# Supplementary material for: The Transcriptomic Landscape of Age-Induced Changes in Human Visceral Fat and the Predicted Omentum-Liver Connectome in Males
Source: MDPI journal article supplement (doi:10.3390/biomedicines11051446), 2023-05-14
Supplement: s1 [file s1]

**Supplementary Table 1**

| Cluster<br>s | PPI Enrichment<br>score | Number of<br>genes | Random gene set | PPI Enrichment score | Number of genes |
|--------------|-------------------------|--------------------|-----------------|----------------------|-----------------|
| A            | <b>1.08E-09</b>         | 108                | 1               | 0.499                | 50              |
| B            | <b>6.44E-05</b>         | 86                 | 2               | 0.898                | 50              |
| C            | <b>&lt; 1.0e-16</b>     | 102                | 3               | 0.197                | 100             |
| D            | 0.448                   | 19                 | 4               | 0.675                | 250             |
| E            | 0.148                   | 18                 | 5               | 0.5                  | 250             |
| F            | <b>0.00741</b>          | 46                 | 6               | 0.871                | 350             |
| G            | <b>0.000805</b>         | 50                 | 7               | 0.447                | 350             |
| H            | <b>1.29E-07</b>         | 49                 | 8               | 0.733                | 400             |
| I            | <b>1.60E-12</b>         | 125                | 9               | 0.265                | 800             |
| J            | <b>0.00271</b>          | 114                | 10              | <b>0.03</b>          | 800             |
| K            | <b>0.0159</b>           | 54                 | 11              | 0.808                | 800             |

Cluster quality test performed on STRINGDB. Clusters had very significant protein-protein interaction p-values (PPI) compared to randomly selected genes.
