# Supplementary material for: The Transcriptomic Landscape of Age-Induced Changes in Human Visceral Fat and the Predicted Omentum-Liver Connectome in Males
Source: Biomedicines. 2023 May 14;11(5):1446. doi: 10.3390/biomedicines11051446 (PMC10216224; doi:10.3390/biomedicines11051446)
Supplement: Supplementary file 1 [file biomedicines-11-01446-s001.zip]

Archive with 9 entries (9 files):
- biomedicines-2237156-figure S1-S4.pdf
- Material_S2.xlsx
- Material_S3.xlsx
- Material_S4.xlsx
- Material_S5.xlsx
- Material_S6.xlsx
- Material_S7.xlsx
- Supplementari_material_description.txt
- Table S1.pdf
