# Supplementary material for: The Transcriptomic Landscape of Age-Induced Changes in Human Visceral Fat and the Predicted Omentum-Liver Connectome in Males
Source: Biomedicines. 2023 May 14;11(5):1446. doi: 10.3390/biomedicines11051446 (PMC10216224; doi:10.3390/biomedicines11051446)
Supplement: Supplementary file 1 [file biomedicines-11-01446-s001.zip › Material_S2.xlsx]

## Sheet: 30-39
gene_symbol	logFC	AveExpr	t	P.Value	adj.P.Val	B	FC
A1BG	0.072847	1.55844	0.317221	0.753674	0.922873	-5.25772	1.05179
A1CF	0.311834	-4.82242	0.517953	0.608982	0.861414	-4.86809	1.24128
A2M	-0.0490505	10.2505	-0.271328	0.788336	0.937686	-5.54761	0.966572
A2ML1	0.126077	-1.49916	0.255604	0.800319	0.942279	-4.96492	1.09132
A3GALT2	-0.117149	-4.01072	-0.19504	0.846916	0.956091	-4.93394	0.922008
A4GALT	-0.33507	5.42253	-1.56599	0.12975	0.541615	-4.73829	0.792746
A4GNT	-0.648839	-2.56082	-1.01306	0.320604	0.72737	-4.69081	0.637793
AAAS	-0.00609553	5.3955	-0.0538558	0.957472	0.992059	-5.84998	0.995784
AACS	-0.0886862	5.75051	-0.192113	0.849184	0.956091	-5.8378	0.940379
AADAC	1.12744	2.33774	1.6395	0.113461	0.523724	-4.35892	2.18471
AADACL2	-0.286029	-3.95717	-0.410213	0.685096	0.894843	-4.90064	0.820157
AADACL3	-0.900547	-3.65208	-1.02123	0.31679	0.723933	-4.68148	0.535684
AADACL4	-0.52938	-5.65761	-0.861598	0.396985	0.774997	-4.74628	0.692853
AADAT	0.346505	2.39357	2.05203	0.0506286	0.408324	-3.81152	1.27148
AAED1	-0.216307	4.8355	-1.84698	0.0764541	0.463896	-4.30864	0.860766
AAGAB	-0.259608	4.75436	-2.2545	0.0330439	0.362315	-3.6344	0.835315
AAK1	0.0407509	3.96474	0.203675	0.840233	0.955348	-5.69366	1.02865
AAMDC	-0.12746	3.57434	-0.763363	0.452292	0.808252	-5.38491	0.915442
AAMP	-0.262836	6.79033	-1.58753	0.124787	0.536436	-4.68013	0.833448
AANAT	0.312127	-3.511	0.637082	0.529783	0.831095	-4.84313	1.24154
AAR2	-0.249353	5.51491	-1.9369	0.0639766	0.436042	-4.19196	0.841274
AARD	0.138668	-4.48092	0.21112	0.834482	0.954178	-4.92793	1.10089
AARS	-0.22324	6.90128	-1.74411	0.0932541	0.490952	-4.45421	0.856639
AARS2	-0.0307062	3.72025	-0.282187	0.780091	0.934192	-5.63631	0.978941
AARSD1	-0.184057	4.43809	-2.13534	0.0425723	0.387243	-3.81995	0.880224
AASDH	0.0926512	3.64439	0.894558	0.379438	0.766679	-5.29962	1.06633
AASDHPPT	-0.0979708	4.67183	-0.948922	0.351618	0.748908	-5.38642	0.934346
AASS	0.213802	5.93546	0.589374	0.560826	0.838518	-5.68847	1.15974
AATF	-0.124433	5.52361	-0.986612	0.333156	0.735168	-5.39843	0.917364
AATK	0.209434	3.30305	0.655481	0.518063	0.831095	-5.40686	1.15623
ABAT	0.140818	3.94228	0.567691	0.575238	0.843548	-5.56095	1.10253
ABCA1	-0.0252395	7.69744	-0.10766	0.915113	0.975859	-5.74927	0.982657
ABCA10	0.75537	5.0019	2.39829	0.0241429	0.341434	-3.38765	1.68806
ABCA12	0.277588	-4.58979	0.409981	0.685264	0.894843	-4.8953	1.21217
ABCA13	-0.215267	-3.21176	-0.269892	0.789428	0.938045	-4.93254	0.861387
ABCA2	0.166693	6.5031	0.969536	0.341437	0.74107	-5.39315	1.12248
ABCA3	-0.0803354	5.19126	-0.391871	0.698428	0.901484	-5.77053	0.945838
ABCA4	0.0594919	0.227287	0.16188	0.872684	0.961707	-5.11811	1.0421
ABCA5	0.292218	6.45037	1.36537	0.18413	0.606075	-4.98051	1.22452
ABCA6	0.81526	6.74805	2.89436	0.00770685	0.321177	-2.42807	1.75962
ABCA7	0.17556	4.67669	0.794474	0.434294	0.798804	-5.51029	1.1294
ABCA8	0.314127	6.65525	1.32749	0.196177	0.620054	-5.01615	1.24326
ABCA9	0.766306	7.40356	2.92268	0.00720313	0.321177	-2.36165	1.70091
ABCB1	-0.0257823	2.37859	-0.0679555	0.946354	0.988148	-5.42733	0.982288
ABCB10	-0.0787165	4.63741	-0.720304	0.477927	0.820941	-5.55848	0.9469
ABCB11	0.877613	1.92305	1.3914	0.176194	0.595121	-4.60261	1.83733
ABCB4	0.566836	0.436323	1.42777	0.16556	0.582953	-4.4758	1.48127
ABCB5	1.4975	0.302328	2.25481	0.033022	0.362315	-3.59486	2.82354
ABCB6	-0.371452	1.55455	-1.68113	0.105017	0.507759	-4.26026	0.773004
ABCB7	0.310579	4.63253	3.51307	0.00168382	0.310503	-1.13782	1.24021
ABCB8	-0.274254	4.71788	-2.51834	0.0184599	0.334249	-3.15491	0.826878
ABCB9	0.198132	3.26527	0.973955	0.339281	0.740625	-5.17437	1.14721
ABCC1	0.116469	5.67485	0.905769	0.373586	0.762206	-5.47017	1.08408
ABCC10	0.0828281	4.42003	0.704947	0.487269	0.824914	-5.54532	1.05909
ABCC11	-0.205977	-2.21601	-0.374791	0.710933	0.907664	-4.92475	0.866951
ABCC12	0.189678	-6.16252	0.362506	0.719978	0.912	-4.89568	1.14051
ABCC2	0.329674	2.20424	1.55968	0.131233	0.54334	-4.4428	1.25673
ABCC3	0.0817653	4.60543	0.205306	0.838973	0.955247	-5.77803	1.05831
ABCC4	-0.218306	2.97693	-1.06809	0.295544	0.707758	-5.04745	0.859574
ABCC5	0.702646	5.86661	2.9912	0.00611081	0.313267	-2.24117	1.62749
ABCC6	-0.0245386	2.47607	-0.0608947	0.951921	0.990456	-5.44483	0.983135
ABCC8	0.585598	-0.407096	1.36247	0.18503	0.606527	-4.50507	1.50066
ABCC9	0.255486	6.44028	1.68213	0.104822	0.507473	-4.5634	1.19374
ABCD1	-0.280447	5.79221	-0.890444	0.3816	0.767478	-5.48255	0.823336
ABCD2	-0.260202	4.711	-0.534776	0.597464	0.854975	-5.67384	0.834971
ABCD3	-0.0785414	5.46021	-0.704268	0.487685	0.824914	-5.61852	0.947015
ABCD4	0.125769	5.50045	0.987457	0.332749	0.734625	-5.39731	1.09109
ABCE1	-0.359239	5.65322	-1.97447	0.059315	0.424903	-4.1327	0.779576
ABCF1	-0.321293	6.29144	-2.33159	0.0279562	0.351075	-3.51346	0.800352
ABCF2	-0.399284	5.62645	-2.21198	0.0361973	0.371102	-3.73316	0.758234
ABCF3	-0.182106	5.62978	-1.5462	0.134449	0.547975	-4.76757	0.881416
ABCG1	-0.301374	4.89892	-0.840677	0.408388	0.781501	-5.49398	0.811479
ABCG2	0.857777	2.38041	2.28698	0.0308057	0.357668	-3.46079	1.81224
ABCG4	-0.0284	-1.88893	-0.0640884	0.949402	0.989309	-4.96778	0.980507
ABCG5	-1.01901	-3.04216	-1.47208	0.153305	0.569052	-4.41162	0.493456
ABCG8	0.109011	-3.94085	0.132442	0.89568	0.968897	-4.93996	1.07849
ABHD1	-0.0121972	0.105648	-0.0429217	0.9661	0.995128	-5.11331	0.991581
ABHD10	0.16215	4.29699	1.75834	0.0907575	0.488355	-4.40003	1.11895
ABHD11	-0.207928	3.5144	-1.55243	0.132954	0.545164	-4.59529	0.86578
ABHD12	0.0718079	5.67491	0.576779	0.569175	0.841643	-5.6977	1.05103
ABHD12B	0.135143	-0.9309	0.387356	0.701726	0.902678	-4.97468	1.0982
ABHD13	-0.0643518	4.20193	-0.567055	0.575663	0.843548	-5.59876	0.956375
ABHD14A	-0.224925	3.61196	-1.40788	0.17131	0.589851	-4.78554	0.855639
ABHD14B	-0.125626	6.36939	-0.824745	0.417209	0.786295	-5.51885	0.916606
ABHD15	-0.506432	5.50721	-1.5591	0.13137	0.543414	-4.749	0.703961
ABHD16A	0.00255602	5.07485	0.0259056	0.979535	0.997402	-5.83681	1.00177
ABHD16B	-0.129435	2.02725	-0.616734	0.542909	0.831095	-5.2156	0.914189
ABHD17A	-0.176303	6.14865	-1.55794	0.131644	0.543426	-4.74538	0.884968
ABHD17B	-0.126157	3.81379	-1.10377	0.280061	0.69741	-5.141	0.916269
ABHD17C	-0.237409	1.80666	-1.23043	0.229831	0.652895	-4.74854	0.848267
ABHD2	0.0122924	6.45	0.070708	0.944185	0.987403	-5.83206	1.00856
ABHD3	0.17142	4.11319	1.33218	0.194653	0.618451	-4.93788	1.12617
ABHD4	-0.100917	5.93585	-0.830994	0.413735	0.784223	-5.52805	0.93244
ABHD5	-0.421206	5.77484	-1.1293	0.269342	0.690331	-5.26182	0.7468
ABHD6	-0.12185	4.57095	-0.841636	0.407861	0.781316	-5.46457	0.919009
ABHD8	-0.157262	3.36902	-0.929538	0.361377	0.754845	-5.22767	0.896725
ABI1	0.0460329	6.00757	0.428177	0.672138	0.891065	-5.7644	1.03242
ABI2	0.187609	5.24321	1.25383	0.221342	0.645587	-5.12	1.13887
ABI3	-0.0355907	3.14829	-0.155667	0.877529	0.96413	-5.55881	0.975632
ABI3BP	0.60894	6.42364	1.78583	0.0860944	0.481698	-4.41241	1.52514
ABL1	-0.183643	7.48573	-1.34563	0.190334	0.612319	-4.94996	0.880477
ABL2	0.0563686	5.87131	0.420447	0.677701	0.892795	-5.77021	1.03985
ABLIM1	0.370615	8.54777	2.45592	0.0212391	0.334335	-3.22565	1.2929
ABLIM2	-0.0265033	4.2183	-0.0877833	0.930739	0.982154	-5.74684	0.981797
ABLIM3	0.0461981	8.00719	0.190343	0.850556	0.956442	-5.71612	1.03254
ABO	0.498842	0.284296	1.5666	0.129606	0.541615	-4.34352	1.41308
ABR	0.2834	6.97276	2.13527	0.042579	0.387243	-3.8343	1.21706
ABRA	-1.20586	-3.76828	-1.73373	0.095112	0.493073	-4.22207	0.433512
ABRACL	-0.290299	3.03499	-1.12715	0.270235	0.690996	-5.00194	0.817733
ABT1	-0.281573	4.28548	-2.68684	0.0125532	0.32524	-2.81854	0.822694
ABTB1	0.206403	6.44895	1.18984	0.245133	0.667946	-5.18007	1.15381
ABTB2	-0.504119	2.39562	-1.79645	0.0843484	0.478209	-4.16416	0.705091
AC003006.1	-0.135907	-6.94733	-0.612903	0.545399	0.831095	-4.83385	0.910098
AC004593.3	-0.461824	-6.59105	-1.25036	0.222585	0.646958	-4.55058	0.726068
AC005154.6	-0.068444	5.06007	-0.48467	0.632072	0.873654	-5.72493	0.953666
AC005702.1	-0.267738	-6.61713	-0.862802	0.396335	0.774779	-4.74393	0.830621
AC006486.1	0.124517	-2.33257	0.42382	0.675271	0.891927	-4.91269	1.09014
AC007040.2	-0.135907	-6.94733	-0.612903	0.545399	0.831095	-4.83385	0.910098
AC008397.1	-0.135907	-6.94733	-0.612903	0.545399	0.831095	-4.83385	0.910098
AC010323.1	-0.135907	-6.94733	-0.612903	0.545399	0.831095	-4.83385	0.910098
AC010327.1	-0.135907	-6.94733	-0.612903	0.545399	0.831095	-4.83385	0.910098
AC010522.1	-0.401694	-5.89994	-0.973039	0.339727	0.74091	-4.69625	0.756969
AC011499.1	-0.135907	-6.94733	-0.612903	0.545399	0.831095	-4.83385	0.910098
AC012314.20	0.0569566	-6.7185	0.163544	0.871387	0.96087	-4.92102	1.04027
AC012314.8	0.356571	-0.471768	1.54003	0.135942	0.550021	-4.3592	1.28038
AC017083.3	-0.135907	-6.94733	-0.612903	0.545399	0.831095	-4.83385	0.910098
AC018512.1	-0.135907	-6.94733	-0.612903	0.545399	0.831095	-4.83385	0.910098
AC020915.1	-0.112757	-4.61263	-0.231383	0.818874	0.948803	-4.92449	0.924819
AC040162.1	-0.205355	-6.26085	-0.479373	0.635782	0.876059	-4.87081	0.867325
AC068896.1	-0.135907	-6.94733	-0.612903	0.545399	0.831095	-4.83385	0.910098
AC068946.1	-0.197491	-6.78454	-0.702335	0.488869	0.824914	-4.80498	0.872066
AC078864.2	-0.135907	-6.94733	-0.612903	0.545399	0.831095	-4.83385	0.910098
AC093323.1	-0.462385	-6.52038	-1.1666	0.254228	0.677661	-4.59757	0.725785
AC093668.1	-0.135169	-6.81525	-0.543751	0.591362	0.851022	-4.8537	0.910563
AC093668.2	-0.246639	-0.177397	-0.55412	0.584352	0.848416	-4.98613	0.842858
AC096887.1	-0.135907	-6.94733	-0.612903	0.545399	0.831095	-4.83385	0.910098
AC098650.1	-0.135907	-6.94733	-0.612903	0.545399	0.831095	-4.83385	0.910098
AC105052.1	-0.532223	-6.74921	-1.83417	0.0783927	0.468207	-4.15559	0.691488
AC107871.1	-0.135907	-6.94733	-0.612903	0.545399	0.831095	-4.83385	0.910098
AC131160.1	-0.725451	-6.65246	-1.99987	0.0563354	0.419744	-4.02514	0.604808
AC138647.1	-0.13619	-6.81525	-0.457739	0.651039	0.882589	-4.87513	0.909919
ACAA1	-0.136805	5.72793	-0.931622	0.360319	0.754506	-5.4482	0.909531
ACAA2	-0.459441	7.42348	-2.02716	0.0532827	0.41151	-3.99502	0.727268
ACACA	-0.0500837	6.20263	-0.177832	0.860268	0.959174	-5.83034	0.96588
ACACB	-0.112974	10.2591	-0.240376	0.811971	0.945896	-5.55415	0.92468
ACAD10	0.0671555	4.76387	0.644625	0.52496	0.831095	-5.61819	1.04765
ACAD11	0.809615	-4.95192	1.2991	0.205602	0.630359	-4.52305	1.75274
ACAD8	-0.0832516	5.03618	-0.845601	0.405686	0.779964	-5.49939	0.943928
ACAD9	-0.17952	5.42577	-1.59635	0.1228	0.534195	-4.69693	0.882997
ACADL	0.332863	3.59524	0.903472	0.37478	0.763403	-5.28483	1.25951
ACADM	-0.143957	5.75101	-0.927177	0.362577	0.755517	-5.45193	0.905033
ACADS	-0.293249	6.37228	-1.15692	0.258088	0.680292	-5.21807	0.816062
ACADSB	0.21964	5.32003	1.29036	0.20857	0.632421	-5.08108	1.16444
ACADVL	-0.234348	8.84347	-2.02068	0.0539934	0.414348	-3.94911	0.850069
ACAN	-0.471837	-1.15691	-0.660411	0.514946	0.831095	-4.87819	0.721046
ACAP1	-0.0505421	2.88284	-0.199769	0.843255	0.956091	-5.50277	0.965573
ACAP2	0.168852	6.10754	1.58731	0.124838	0.536492	-4.70665	1.12416
ACAP3	0.0583421	5.74174	0.378384	0.708295	0.906546	-5.78724	1.04127
ACAT1	-0.106104	6.81505	-0.647793	0.522942	0.831095	-5.61645	0.929094
ACAT2	0.0348884	3.72269	0.148298	0.883281	0.965593	-5.66315	1.02448
ACBD3	-0.196491	5.76816	-1.81516	0.0813481	0.473927	-4.38244	0.87267
ACBD4	0.291477	4.1477	1.74522	0.0930584	0.490627	-4.40483	1.22389
ACBD5	0.0156315	5.11339	0.203006	0.840751	0.955348	-5.81974	1.01089
ACBD6	-0.166051	4.49712	-1.69588	0.102157	0.502982	-4.50745	0.891279
ACBD7	-0.802813	-2.77737	-1.45406	0.158197	0.573429	-4.42397	0.573231
ACCS	0.464184	5.03801	2.3293	0.0280965	0.351075	-3.5138	1.37954
ACCSL	-0.442332	-5.07802	-0.652167	0.520163	0.831095	-4.82698	0.735944
ACD	0.174686	4.13413	1.45563	0.157768	0.573075	-4.79229	1.12872
ACE	0.259771	4.52995	0.626487	0.536596	0.831095	-5.60595	1.19729
ACE2	-0.279029	2.5363	-0.334525	0.740735	0.919236	-5.40945	0.824145
ACER1	0.898084	-4.20103	1.40633	0.171764	0.589949	-4.4561	1.86359
ACER2	0.164092	3.75939	0.571617	0.572615	0.842989	-5.53015	1.12046
ACER3	-0.125252	5.66788	-0.681592	0.501676	0.831054	-5.6357	0.916844
ACHE	0.0561131	0.452151	0.140693	0.889224	0.966564	-5.14535	1.03966
ACIN1	0.0757248	7.27847	0.776019	0.444917	0.804862	-5.50322	1.05389
ACKR2	0.546179	3.06149	1.47303	0.153051	0.568698	-4.63625	1.46021
ACKR3	-0.298679	6.62577	-1.02477	0.315149	0.722801	-5.33673	0.812996
ACKR4	0.220167	2.58478	0.386267	0.702521	0.902882	-5.40205	1.16487
ACLY	-0.291884	7.12158	-1.25287	0.221686	0.645891	-5.07646	0.816834
ACMSD	0.313712	-5.26817	0.605425	0.550278	0.832902	-4.84061	1.2429
ACO1	-0.576901	8.14323	-1.77475	0.0879485	0.485031	-4.35068	0.670403
ACO2	-0.0750705	6.42042	-0.290153	0.774059	0.930641	-5.79587	0.949296
ACOT1	-0.685106	3.65003	-1.75844	0.0907399	0.488355	-4.33375	0.62196
ACOT11	0.578627	0.351285	1.51818	0.141342	0.55566	-4.39045	1.49343
ACOT12	1.05764	-4.6578	1.92347	0.0657195	0.440138	-4.07784	2.08152
ACOT13	-0.0806645	3.94216	-0.694931	0.493419	0.82727	-5.48772	0.945622
ACOT2	-0.642858	5.82724	-2.80627	0.00949553	0.321994	-2.61606	0.640443
ACOT4	-0.388705	2.72233	-1.26415	0.217675	0.642851	-4.82307	0.763815
ACOT6	0.601858	-4.18121	0.8988	0.377216	0.765221	-4.73697	1.51767
ACOT7	-0.313819	3.63092	-1.93605	0.0640858	0.436299	-4.07128	0.804509
ACOT8	-0.0845672	3.40237	-0.771301	0.447658	0.806414	-5.35093	0.943067
ACOT9	-0.0926813	5.62768	-1.35144	0.188492	0.609851	-5.01493	0.937778
ACOX1	-0.318558	6.9143	-1.06677	0.296127	0.707827	-5.2812	0.801871
ACOX2	0.309166	4.19951	2.0007	0.0562406	0.419744	-4.02208	1.23899
ACOX3	-0.135702	4.22249	-1.20856	0.237982	0.660259	-5.08797	0.910227
ACOXL	0.264625	-2.4012	0.489452	0.62873	0.871855	-4.89595	1.20132
ACP1	-0.120878	5.56786	-1.47048	0.153735	0.569052	-4.86651	0.919628
ACP2	-0.191929	5.55202	-1.26146	0.218627	0.6439	-5.11889	0.875434
ACP5	1.26685	4.74591	1.99777	0.056577	0.419744	-4.06627	2.40636
ACP6	0.633145	3.3778	3.33645	0.00262138	0.310503	-1.55176	1.55094
ACPP	-0.12061	-0.251785	-0.220054	0.827591	0.951493	-5.06217	0.919799
ACR	0.215644	1.37168	0.583079	0.564991	0.839787	-5.14026	1.16122
ACRBP	0.374603	0.892462	1.48035	0.151101	0.567794	-4.44495	1.29648
ACRV1	0.276089	-5.09012	0.503202	0.619166	0.866884	-4.87011	1.21091
ACSBG1	-0.0642242	-1.0304	-0.194997	0.846949	0.956091	-5.00064	0.95646
ACSBG2	0.851527	-3.09385	1.99318	0.0571079	0.420142	-4.00744	1.80441
ACSF2	-0.26318	5.67318	-1.27744	0.213022	0.637588	-5.10165	0.833249
ACSF3	-0.071178	4.1624	-0.644025	0.525343	0.831095	-5.55046	0.95186
ACSL1	-0.478872	10.3901	-0.959765	0.346238	0.745161	-5.16937	0.717539
ACSL3	-0.0888558	5.77988	-0.79955	0.431399	0.797887	-5.55385	0.940268
ACSL4	-0.124068	6.54796	-0.556367	0.582838	0.847597	-5.68301	0.917596
ACSL5	-0.367417	5.79044	-1.98791	0.0577218	0.420943	-4.11074	0.775169
ACSL6	0.0728392	-1.35731	0.193629	0.84801	0.956091	-4.98012	1.05178
ACSM1	-0.241589	-2.27291	-0.571697	0.572561	0.842989	-4.87431	0.845813
ACSM2A	0.805395	-2.01394	1.43371	0.163874	0.580941	-4.43803	1.74762
ACSM2B	0.353456	-1.97771	0.833038	0.412602	0.78391	-4.7814	1.27762
ACSM3	0.442624	-0.624337	1.76565	0.0894967	0.486279	-4.16015	1.35907
ACSM4	0.681332	-3.50435	1.58151	0.126159	0.536841	-4.33475	1.60362
ACSM5	0.233975	4.89736	0.777094	0.444294	0.804752	-5.54142	1.17607
ACSS1	0.363938	5.24333	2.37278	0.0255413	0.346186	-3.4411	1.28693
ACSS2	-0.131713	7.28267	-0.593887	0.55785	0.837165	-5.6182	0.912747
ACSS3	0.0298583	5.87868	0.0921337	0.927316	0.980805	-5.85019	1.02091
ACTA1	-0.285062	2.28347	-0.416337	0.680667	0.893465	-5.34059	0.820706
ACTA2	-0.569907	7.7861	-1.25936	0.219373	0.64433	-5.03084	0.67366
ACTB	-0.533349	11.5992	-3.02718	0.00560249	0.313267	-2.19158	0.690949
ACTBL2	0.0558092	-6.39293	0.109741	0.913479	0.974852	-4.92519	1.03944
ACTC1	0.0753341	0.775401	0.122727	0.903291	0.971631	-5.18546	1.05361
ACTG1	-0.199394	10.6408	-1.08158	0.289621	0.702274	-5.05091	0.870916
ACTG2	-0.81473	4.40649	-1.09528	0.28369	0.699036	-5.22472	0.568515
ACTL10	-0.207834	-0.408152	-0.810343	0.425284	0.793501	-4.85928	0.865836
ACTL6A	-0.198473	4.77854	-2.27929	0.0313228	0.358254	-3.59204	0.871473
ACTL6B	0.0782061	-4.93474	0.147377	0.884	0.965867	-4.93007	1.0557
ACTL7A	0.0390443	-5.85761	0.064547	0.949041	0.989309	-4.92888	1.02743
ACTL7B	-1.12275	-5.19108	-1.85891	0.0746848	0.461064	-4.13226	0.459217
ACTL8	-0.134772	-6.55109	-0.366543	0.717001	0.910925	-4.89415	0.910814
ACTL9	0.152398	-5.8269	0.298007	0.768126	0.928289	-4.9076	1.11142
ACTN1	-0.330892	7.96135	-1.68336	0.10458	0.50725	-4.48959	0.795045
ACTN2	0.48464	0.875198	1.16461	0.255018	0.677843	-4.72391	1.39924
ACTN3	-0.163292	-1.47684	-0.490253	0.628171	0.871847	-4.91725	0.892985
ACTN4	-0.271346	8.78339	-1.85761	0.0748762	0.461064	-4.20043	0.828546
ACTR10	-0.117872	5.72826	-1.95647	0.0615099	0.43056	-4.16169	0.921546
ACTR1A	-0.214054	7.09526	-2.05003	0.0508366	0.408324	-3.97121	0.862111
ACTR1B	0.0390974	6.2472	0.395411	0.695847	0.900566	-5.7694	1.02747
ACTR2	-0.220779	7.54768	-1.96547	0.0604043	0.426985	-4.08838	0.858102
ACTR3	-0.258071	7.06793	-1.71795	0.0979974	0.498055	-4.48434	0.836205
ACTR3B	-0.0394853	2.93742	-0.304034	0.763583	0.926935	-5.48982	0.973002
ACTR3C	0.239678	-0.817307	0.745323	0.462931	0.81458	-4.86324	1.18073
ACTR5	0.0393021	3.66935	0.443706	0.661019	0.886007	-5.57419	1.02762
ACTR6	0.0125581	4.16935	0.143562	0.886981	0.966389	-5.73394	1.00874
ACTR8	-0.0892954	4.11374	-0.951306	0.35043	0.748433	-5.32136	0.939982
ACTRT1	-0.136253	-6.75383	-0.391435	0.698746	0.901635	-4.88923	0.909879
ACTRT2	-0.506741	-5.935	-0.873095	0.390806	0.772334	-4.74065	0.70381
ACTRT3	-0.275011	1.12319	-1.04687	0.305036	0.714416	-4.83538	0.826444
ACVR1	0.181653	5.44395	1.0562	0.30084	0.711287	-5.33205	1.13418
ACVR1B	-0.287144	5.41988	-1.85425	0.0753718	0.461614	-4.32021	0.819523
ACVR1C	-0.167538	6.16699	-0.365329	0.717896	0.911336	-5.78322	0.890361
ACVR2A	0.191198	4.54828	1.12159	0.272546	0.692339	-5.21323	1.14171
ACVR2B	0.562233	3.59184	3.22353	0.0034678	0.313267	-1.76302	1.47655
ACVRL1	-0.312816	6.67297	-2.31712	0.0288533	0.351075	-3.5289	0.805069
ACY1	-0.381208	4.32359	-1.80831	0.0824352	0.475323	-4.329	0.767794
ACY3	-0.712324	-5.01355	-1.13237	0.268075	0.688984	-4.61834	0.610336
ACYP1	0.0172009	2.15693	0.0848529	0.933045	0.983091	-5.38838	1.01199
ACYP2	-0.110685	3.65815	-0.716651	0.48014	0.821907	-5.42941	0.926148
ADA	-0.0133249	4.2338	-0.0788722	0.937754	0.984391	-5.74965	0.990806
ADAD1	-0.00557383	-6.23014	-0.0123239	0.990264	0.997402	-4.92858	0.996144
ADAD2	0.102831	-0.046134	0.177427	0.860583	0.959174	-5.08776	1.07388
ADAL	0.0511076	2.93899	0.296872	0.768982	0.928625	-5.492	1.03606
ADAM10	0.109155	5.98377	1.08388	0.288617	0.701648	-5.30464	1.0786
ADAM11	0.650365	1.15614	2.28341	0.0310448	0.357846	-3.50135	1.56956
ADAM12	-0.397075	4.89202	-1.19342	0.243755	0.665947	-5.16739	0.759396
ADAM15	-0.272943	7.62982	-1.55828	0.131563	0.543426	-4.67662	0.827629
ADAM17	0.135656	4.56258	1.1134	0.275982	0.69585	-5.22283	1.09859
ADAM18	0.322065	-6.7185	1.09235	0.284951	0.70044	-4.63681	1.25012
ADAM19	-0.348505	3.16616	-1.07563	0.292222	0.705553	-5.06973	0.785398
ADAM2	-0.655417	-6.55571	-2.13579	0.0425322	0.387243	-3.91323	0.634892
ADAM20	0.371611	-2.19907	1.08165	0.289589	0.702274	-4.65667	1.2938
ADAM21	0.676078	-2.14642	2.23701	0.0343097	0.366914	-3.77919	1.59779
ADAM22	0.274808	3.12102	0.923658	0.364372	0.756231	-5.19206	1.20983
ADAM23	-0.00606968	1.02698	-0.0132886	0.989502	0.997402	-5.22295	0.995802
ADAM28	0.448304	2.44449	1.23206	0.22923	0.652895	-4.81918	1.36444
ADAM29	0.765495	-6.2638	1.82214	0.0802515	0.471916	-4.16426	1.69995
ADAM30	0.127818	-6.81525	0.384741	0.703638	0.903555	-4.89049	1.09264
ADAM32	-0.123698	0.566391	-0.422682	0.676091	0.89229	-5.1027	0.917832
ADAM33	0.685496	6.85351	2.23864	0.0341902	0.36644	-3.66138	1.60826
ADAM7	-0.135907	-6.94733	-0.612903	0.545399	0.831095	-4.83385	0.910098
ADAM8	-0.117688	2.69144	-0.402196	0.69091	0.897807	-5.41544	0.921663
ADAM9	0.0680445	6.85796	0.495998	0.624168	0.869722	-5.69505	1.04829
ADAMDEC1	1.63735	0.324914	3.08854	0.00482745	0.313267	-2.50611	3.11093
ADAMTS1	-0.0125363	8.59491	-0.0408047	0.967771	0.995533	-5.69036	0.991348
ADAMTS10	0.49483	5.68719	1.99744	0.0566153	0.419744	-4.09549	1.40915
ADAMTS12	-0.315992	5.18345	-1.77736	0.0875084	0.484592	-4.43046	0.803298
ADAMTS13	0.232125	2.21982	1.15086	0.260528	0.681873	-4.86736	1.17456
ADAMTS14	-1.13856	-0.973396	-1.45318	0.15844	0.573923	-4.42648	0.454214
ADAMTS15	-0.155328	6.66522	-0.6781	0.50385	0.831095	-5.60638	0.897928
ADAMTS16	-0.366951	0.932372	-0.826114	0.416446	0.785666	-4.96387	0.775419
ADAMTS17	-0.0562644	1.00463	-0.246673	0.807148	0.944892	-5.19756	0.961751
ADAMTS18	-0.625763	2.92011	-0.808577	0.426281	0.79395	-5.24426	0.648077
ADAMTS19	0.440722	-3.84584	0.560389	0.580133	0.845728	-4.86401	1.35728
ADAMTS2	0.0187655	7.22534	0.114126	0.910037	0.973616	-5.78094	1.01309
ADAMTS20	0.290008	-6.33737	0.741823	0.465011	0.815888	-4.79146	1.22265
ADAMTS3	0.168477	2.14457	0.542602	0.592142	0.851374	-5.26838	1.12387
ADAMTS4	-1.07566	6.96154	-2.33552	0.0277172	0.351075	-3.48685	0.474454
ADAMTS5	0.204234	7.06907	0.928526	0.361891	0.755229	-5.39725	1.15207
ADAMTS6	0.222675	2.07477	0.618221	0.541944	0.831095	-5.22201	1.1669
ADAMTS7	-0.0770604	4.56444	-0.337311	0.738659	0.919019	-5.73991	0.947987
ADAMTS8	-0.725239	-0.149402	-1.68274	0.104703	0.507285	-4.23092	0.604897
ADAMTS9	-1.31052	5.85271	-3.10062	0.00468741	0.313267	-2.01472	0.403175
ADAMTSL1	0.91163	3.61167	2.40398	0.0238408	0.340315	-3.30477	1.88117
ADAMTSL2	-0.461366	0.916851	-0.940849	0.355661	0.751252	-4.89069	0.726298
ADAMTSL3	-0.581147	3.03497	-2.40802	0.0236281	0.340315	-3.27483	0.668432
ADAMTSL4	-0.367208	7.15817	-1.46771	0.15448	0.569701	-4.81894	0.775281
ADAMTSL5	0.224533	0.227137	0.486296	0.630934	0.872881	-5.04702	1.1684
ADAP1	0.0520369	1.63863	0.227655	0.82174	0.949865	-5.28857	1.03673
ADAP2	0.0287556	4.11678	0.102391	0.919251	0.977693	-5.73107	1.02013
ADAR	0.0710546	7.84758	0.750474	0.459878	0.813052	-5.48408	1.05048
ADARB1	0.153821	5.57436	0.841881	0.407726	0.781297	-5.52117	1.11251
ADARB2	0.0112492	-1.74463	0.026547	0.979029	0.997402	-4.9729	1.00783
ADAT1	0.0271642	3.87653	0.186146	0.853812	0.956753	-5.68278	1.01901
ADAT2	0.0144358	3.98094	0.0654327	0.948343	0.989096	-5.71345	1.01006
ADAT3	-0.386403	0.483088	-1.38589	0.17785	0.598566	-4.5149	0.765035
ADCK1	-0.108406	3.20622	-0.723509	0.47599	0.820518	-5.34894	0.927612
ADCK2	-0.0321003	4.1003	-0.299911	0.76669	0.928093	-5.69165	0.977995
ADCK5	0.0837792	3.48334	0.625571	0.537187	0.831095	-5.45495	1.05979
ADCY1	0.032664	3.06541	0.10566	0.916684	0.976123	-5.5492	1.0229
ADCY10	0.209569	-1.13857	0.488164	0.629629	0.872301	-4.93553	1.15634
ADCY2	0.682025	2.01074	1.59273	0.123614	0.535089	-4.38916	1.60439
ADCY3	-0.218116	6.85633	-0.750626	0.459788	0.813052	-5.54724	0.859687
ADCY4	-0.00768846	7.06504	-0.048951	0.961342	0.993472	-5.79662	0.994685
ADCY5	-0.0349982	6.57892	-0.111192	0.912339	0.974279	-5.8217	0.976033
ADCY6	0.0653674	7.3918	0.447588	0.658252	0.885061	-5.68191	1.04635
ADCY7	0.441076	3.12085	1.48769	0.149166	0.565747	-4.62617	1.35762
ADCY8	0.315687	-5.5592	0.397301	0.69447	0.899675	-4.89145	1.2446
ADCY9	0.174867	5.16207	1.34572	0.190306	0.612319	-5.01045	1.12886
ADCYAP1	1.2496	-0.519241	1.27913	0.212436	0.637517	-4.56495	2.37775
ADCYAP1R1	-0.822595	3.62161	-2.26829	0.0320767	0.361569	-3.53789	0.565424
ADD1	0.0255582	8.42346	0.242542	0.810312	0.94537	-5.67619	1.01787
ADD2	-0.232898	1.4244	-0.811708	0.424515	0.792716	-5.02668	0.850924
ADD3	0.292072	7.20881	1.97178	0.0596394	0.424903	-4.09285	1.2244
ADGB	0.372063	-4.75895	0.505656	0.617467	0.86574	-4.87172	1.2942
ADH1A	0.0953982	0.848264	0.221029	0.82684	0.951405	-5.18223	1.06836
ADH1B	-0.088318	11.5918	-0.250386	0.804307	0.944248	-5.47368	0.940619
ADH1C	-0.0493831	3.8301	-0.107618	0.915146	0.975859	-5.68588	0.966349
ADH4	-1.27731	0.205874	-1.67772	0.105688	0.508446	-4.2352	0.412565
ADH5	-0.046734	7.8543	-0.3482	0.730565	0.916022	-5.68722	0.968126
ADH6	0.360634	-0.431522	1.20679	0.238654	0.660621	-4.61978	1.28399
ADH7	-0.995462	-3.31845	-1.82392	0.0799739	0.47129	-4.14892	0.501575
ADHFE1	0.517764	5.24579	1.83741	0.0778974	0.467407	-4.34179	1.43173
ADI1	-0.158457	6.28164	-0.930458	0.36091	0.754506	-5.43695	0.895983
ADIG	0.0580455	-6.7185	0.197937	0.844673	0.956091	-4.91789	1.04105
ADIPOQ	-0.827086	10.1534	-1.58613	0.125105	0.536544	-4.51867	0.563666
ADIPOR1	-0.0345309	6.55433	-0.333758	0.741307	0.919357	-5.77608	0.976349
ADIPOR2	-0.275305	7.47514	-1.26474	0.217465	0.642703	-5.04297	0.826276
ADIRF	0.141563	-1.96256	0.396586	0.694991	0.900222	-4.92447	1.1031
ADK	-0.342874	4.54252	-2.24728	0.0335611	0.364843	-3.63541	0.788469
ADM	-0.0473062	8.16351	-0.128194	0.899007	0.970314	-5.7143	0.967742
ADM2	-1.11103	-1.74453	-2.47019	0.0205717	0.334335	-3.54231	0.462964
ADM5	-0.153656	1.83463	-0.509234	0.614992	0.864603	-5.23541	0.898969
ADNP	0.0922957	6.50585	1.19335	0.24378	0.665947	-5.17377	1.06607
ADNP2	-0.054422	5.19307	-0.446888	0.65875	0.885061	-5.74878	0.96298
ADO	-0.197293	4.09406	-1.42588	0.1661	0.583334	-4.82433	0.872186
ADORA1	-0.718111	2.29869	-1.66191	0.108848	0.514953	-4.32831	0.607893
ADORA2A	0.194016	1.46034	0.78368	0.440488	0.802243	-5.04779	1.14394
ADORA2B	0.0246082	-0.125245	0.0487412	0.961508	0.993472	-5.08937	1.0172
ADORA3	0.918385	3.21185	1.76415	0.0897546	0.486444	-4.27884	1.89
ADPGK	-0.0546433	5.94534	-0.436916	0.665871	0.888216	-5.76217	0.962832
ADPRH	-0.0246937	4.64481	-0.19461	0.847249	0.956091	-5.7841	0.983029
ADPRHL1	-0.327194	1.24445	-1.08234	0.289288	0.701854	-4.81964	0.797085
ADPRHL2	-0.332642	4.49656	-3.67624	0.00111348	0.310503	-0.789579	0.794081
ADPRM	0.206979	3.44378	1.40164	0.173145	0.5906	-4.77039	1.15427
ADRA1A	-0.0612587	2.02429	-0.0969745	0.923509	0.979067	-5.36558	0.958428
ADRA1B	0.306154	1.75064	0.867376	0.393872	0.774138	-5.03107	1.23641
ADRA1D	-0.783459	0.463415	-1.71446	0.0986448	0.498055	-4.1989	0.580972
ADRA2A	-0.840168	7.30861	-2.63454	0.0141643	0.325996	-2.92512	0.558579
ADRA2B	0.584494	3.10442	1.83938	0.0775982	0.466746	-4.163	1.49951
ADRA2C	-0.337792	3.80595	-0.758873	0.454926	0.809808	-5.42494	0.791252
ADRB1	-0.686133	2.08953	-1.17159	0.252256	0.675587	-4.83298	0.621518
ADRB2	-0.320181	5.61051	-1.14999	0.260879	0.682132	-5.24043	0.800969
ADRB3	-2.36378	-2.74126	-3.10757	0.00460862	0.313267	-2.94005	0.194281
ADRM1	-0.386511	5.88258	-2.63413	0.0141776	0.325996	-2.95417	0.764977
ADSL	-0.219773	5.20669	-1.86354	0.074009	0.459943	-4.30035	0.8587
ADSS	-0.0780702	5.31848	-0.75466	0.457406	0.811334	-5.58022	0.947324
ADSSL1	0.3167	3.00102	1.10991	0.277453	0.69741	-5.01297	1.24548
ADTRP	0.0168121	-0.599278	0.0412701	0.967404	0.995417	-5.04545	1.01172
AEBP1	0.33793	8.85255	1.46554	0.155066	0.570642	-4.72998	1.26394
AEBP2	0.0854673	4.86535	0.658456	0.51618	0.831095	-5.61817	1.06103
AEN	-0.457703	3.35711	-1.85947	0.0746035	0.461064	-4.15847	0.728145
AES	-0.0464095	7.78938	-0.337714	0.738359	0.919019	-5.69506	0.968343
AF241726.2	-0.329418	-6.85058	-1.07418	0.292861	0.705553	-4.64605	0.795857
AFAP1	-0.160702	5.87385	-1.08731	0.28713	0.701404	-5.30321	0.894589
AFAP1L1	0.277274	6.62642	1.6647	0.108285	0.51364	-4.5806	1.2119
AFAP1L2	0.522199	4.10804	1.91295	0.0671125	0.443384	-4.15142	1.43614
AFF1	0.528702	7.92027	2.95478	0.00667013	0.317529	-2.29245	1.44263
AFF2	0.0540944	2.09571	0.129425	0.898043	0.969797	-5.37427	1.03821
AFF3	0.0272007	3.66984	0.0796804	0.937117	0.984231	-5.66123	1.01903
AFF4	0.175972	7.07755	1.4243	0.166552	0.583616	-4.87762	1.12973
AFG3L2	-0.171321	5.29826	-1.34633	0.19011	0.612178	-5.01484	0.888029
AFM	0.51603	-6.48967	1.25425	0.221191	0.645587	-4.54836	1.43001
AFMID	-0.11499	3.60099	-0.942744	0.354709	0.750767	-5.25381	0.923388
AFP	0.16452	-6.48621	0.34597	0.73222	0.916926	-4.89792	1.12079
AFTPH	0.125318	5.29002	1.45775	0.157185	0.572725	-4.87708	1.09075
AGA	0.167214	3.60416	1.5863	0.125067	0.536544	-4.56261	1.12289
AGAP1	0.00210679	5.54749	0.0130717	0.989673	0.997402	-5.8544	1.00146
AGAP2	0.163402	1.80682	0.50978	0.614615	0.864603	-5.23111	1.11993
AGAP3	0.0637052	6.45103	0.477968	0.636768	0.876484	-5.72614	1.04515
AGAP4	0.0560402	1.15326	0.126682	0.900191	0.970731	-5.23379	1.03961
AGAP5	0.229463	2.21819	1.31063	0.201732	0.626136	-4.71458	1.1724
AGAP6	-0.0638669	4.49134	-0.397815	0.694096	0.899381	-5.71084	0.956696
AGAP9	0.384298	-1.02179	1.07519	0.292415	0.705553	-4.68314	1.30522
AGBL1	-0.113191	-6.22261	-0.204755	0.839399	0.955348	-4.91804	0.924541
AGBL2	0.333425	-1.20705	0.838452	0.409613	0.782262	-4.8011	1.26
AGBL3	0.125875	0.656346	0.743167	0.464212	0.815267	-4.98184	1.09117
AGBL4	0.340581	-1.40764	0.768413	0.44934	0.807053	-4.82376	1.26627
AGBL5	0.0215643	4.42966	0.214	0.832259	0.953287	-5.75643	1.01506
AGER	0.0294523	2.07146	0.109502	0.913667	0.974876	-5.37223	1.02062
AGFG1	-0.294787	7.40348	-1.62882	0.115715	0.526173	-4.5932	0.815193
AGFG2	0.162059	4.84398	0.79688	0.43292	0.798072	-5.52298	1.11888
AGGF1	-0.0425394	4.9575	-0.364114	0.718792	0.911514	-5.76648	0.970944
AGK	-0.0168368	4.65249	-0.140965	0.889012	0.966564	-5.79337	0.988397
AGL	0.249043	5.34583	2.11456	0.044467	0.3916	-3.89718	1.18842
AGMAT	-0.673222	-1.76518	-1.3986	0.174046	0.592237	-4.46266	0.627104
AGMO	0.0334676	2.11877	0.145881	0.885169	0.966171	-5.37621	1.02347
AGPAT1	-0.0440547	6.05617	-0.48162	0.634207	0.874739	-5.74015	0.969925
AGPAT2	-0.742591	9.01558	-1.68291	0.104669	0.507285	-4.43928	0.597665
AGPAT3	-0.248388	6.32875	-1.54214	0.13543	0.549164	-4.76086	0.841836
AGPAT4	0.512406	4.38821	2.30492	0.0296293	0.354458	-3.5254	1.42643
AGPAT5	-0.259794	3.78322	-1.4365	0.163087	0.580077	-4.77351	0.835207
AGPS	-0.163536	5.62251	-1.43671	0.163027	0.579977	-4.91001	0.892834
AGR2	0.120981	-4.0266	0.144255	0.88644	0.966389	-4.93827	1.08747
AGR3	-1.28482	-6.06389	-2.4203	0.0229933	0.337702	-3.66536	0.410421
AGRN	0.356698	5.55045	1.6255	0.116424	0.527105	-4.6584	1.28049
AGRP	-0.234855	-5.28402	-0.376798	0.709459	0.906957	-4.89701	0.84977
AGT	-0.353884	2.3766	-0.822133	0.418666	0.78748	-5.14837	0.782475
AGTPBP1	0.034778	4.81802	0.36075	0.721275	0.91221	-5.75672	1.0244
AGTR1	0.344237	6.82494	1.23353	0.228692	0.652328	-5.11414	1.26948
AGTR2	-0.268597	-6.68779	-0.752184	0.458867	0.81261	-4.78729	0.830126
AGTRAP	-0.166048	5.07984	-1.40567	0.171958	0.589957	-4.93388	0.891281
AGXT	-0.48401	-1.40773	-0.730523	0.471768	0.818961	-4.83932	0.714987
AGXT2	-0.171727	-6.14741	-0.333387	0.741584	0.919409	-4.90081	0.887779
AHCTF1	0.116403	6.45605	0.747443	0.461673	0.814344	-5.57128	1.08403
AHCY	-0.194472	5.78851	-0.933315	0.359461	0.754374	-5.44648	0.873893
AHCYL1	-0.0497978	7.52912	-0.367003	0.716662	0.910821	-5.70328	0.966072
AHCYL2	0.231483	4.83181	2.92765	0.00711802	0.320666	-2.36147	1.17404
AHDC1	0.183437	5.43472	1.00891	0.322548	0.728036	-5.37645	1.13559
AHI1	0.0220535	4.49475	0.119282	0.905992	0.972467	-5.77891	1.0154
AHNAK	0.246083	11.5885	1.6051	0.120857	0.531624	-4.44276	1.18598
AHNAK2	0.690817	6.16361	2.17946	0.0387893	0.379609	-3.78447	1.6142
AHR	0.0513209	6.66149	0.322292	0.749874	0.922334	-5.77369	1.03621
AHRR	0.31293	1.19598	0.67966	0.502879	0.831095	-5.07291	1.24223
AHSA1	-0.280679	5.83921	-1.8517	0.0757499	0.462104	-4.32611	0.823204
AHSG	-0.125245	-4.99524	-0.19786	0.844733	0.956091	-4.92515	0.916848
AHSP	-2.07275	-4.32801	-3.16982	0.0039576	0.313267	-2.92789	0.237706
AICDA	0.0888654	-1.79012	0.21147	0.834211	0.954161	-4.95935	1.06353
AIDA	-0.050174	5.68462	-0.46015	0.64933	0.881857	-5.75484	0.96582
AIF1	-0.142227	4.10209	-0.500655	0.620933	0.867898	-5.61751	0.906119
AIF1L	-0.216056	6.8873	-0.924868	0.363754	0.756231	-5.41115	0.860916
AIFM1	-0.272136	5.09027	-1.7846	0.0862994	0.481698	-4.41593	0.828093
AIFM2	-0.706326	7.09624	-2.60186	0.0152672	0.327193	-2.99229	0.612879
AIFM3	0.340645	0.0215753	0.84119	0.408106	0.781452	-4.87434	1.26632
AIG1	-0.0544247	4.88908	-0.394018	0.696862	0.900847	-5.7506	0.962978
AIM2	0.554334	-1.5655	1.65161	0.110949	0.518962	-4.27421	1.46849
AIMP1	-0.121078	5.44421	-1.18941	0.2453	0.668005	-5.19649	0.9195
AIMP2	-0.531282	3.32596	-2.88124	0.00795135	0.321177	-2.43338	0.69194
AIP	0.0499585	5.53642	0.393457	0.697271	0.900937	-5.7806	1.03524
AIPL1	-0.462741	-5.66904	-0.852242	0.402059	0.778343	-4.75015	0.725606
AIRE	-0.873518	-2.81684	-1.31949	0.198798	0.623372	-4.51328	0.545814
AJAP1	-0.350833	0.860207	-1.18434	0.247263	0.670258	-4.707	0.784131
AJUBA	-0.0829949	3.37812	-0.351037	0.728461	0.915217	-5.55658	0.944096
AK1	-0.140591	5.4521	-1.14045	0.264758	0.684899	-5.24815	0.907147
AK2	-0.533362	6.85015	-2.4953	0.0194442	0.334335	-3.1989	0.690943
AK3	-0.0179286	6.6562	-0.155755	0.87746	0.964126	-5.81172	0.98765
AK4	-0.651474	5.82987	-2.36245	0.0261282	0.346807	-3.46468	0.63663
AK5	0.531764	-0.665796	0.967222	0.34257	0.742072	-4.76094	1.4457
AK7	-0.159798	0.439719	-0.622585	0.539117	0.831095	-5.01703	0.895151
AK8	0.0900811	0.177378	0.408248	0.686519	0.895906	-5.06545	1.06443
AK9	0.339407	2.83895	2.33785	0.027576	0.351075	-3.38601	1.26524
AKAP1	0.0517629	6.72694	0.291969	0.772686	0.929834	-5.77869	1.03653
AKAP10	0.0658447	5.23862	0.948153	0.352002	0.748916	-5.42484	1.0467
AKAP11	0.190723	6.2849	1.44108	0.161799	0.578643	-4.8936	1.14134
AKAP12	-0.187265	8.51058	-0.43674	0.665997	0.888255	-5.60933	0.878269
AKAP13	0.249516	7.41479	1.79654	0.0843348	0.478209	-4.35301	1.18881
AKAP14	-1.00393	-5.86223	-1.91141	0.0673187	0.443939	-4.09391	0.498641
AKAP17A	-0.135907	-6.94733	-0.612903	0.545399	0.831095	-4.83385	0.910098
AKAP2	-0.373671	8.57945	-2.39477	0.0243315	0.341672	-3.3333	0.771816
AKAP3	-0.150032	-0.829402	-0.467851	0.643888	0.879615	-4.96154	0.901231
AKAP4	-2.15402	-5.80585	-3.64204	0.00121471	0.310503	-2.51088	0.224686
AKAP5	-0.0467439	0.570917	-0.18796	0.852404	0.956647	-5.15364	0.968119
AKAP6	0.721993	1.95281	1.46929	0.154056	0.569052	-4.52292	1.64946
AKAP7	-0.157703	3.7108	-1.03926	0.308496	0.717929	-5.1866	0.896451
AKAP8	-0.0301185	5.81982	-0.291615	0.772954	0.929873	-5.81442	0.97934
AKAP8L	0.162179	6.05613	1.3583	0.186333	0.607346	-5.00244	1.11898
AKAP9	0.361189	6.50916	1.86084	0.0744023	0.46079	-4.29545	1.28448
AKIP1	0.0242894	3.57853	0.185274	0.854488	0.956795	-5.63255	1.01698
AKIRIN1	-0.200846	5.63806	-1.30215	0.20457	0.629501	-5.0731	0.87004
AKIRIN2	-0.18787	5.25272	-1.52327	0.140067	0.554862	-4.79081	0.877901
AKNA	0.128637	6.47858	0.768144	0.449497	0.807053	-5.55562	1.09326
AKNAD1	1.20649	-1.3537	3.16369	0.00401756	0.313267	-2.77488	2.30776
AKR1A1	-0.151763	6.03867	-1.25042	0.222563	0.646958	-5.12808	0.90015
AKR1B1	0.265375	6.3188	1.22041	0.233541	0.655393	-5.15244	1.20195
AKR1B10	-0.163469	-2.00682	-0.267343	0.791368	0.938772	-4.9468	0.892876
AKR1B15	-0.734114	-2.22034	-0.873352	0.390668	0.772334	-4.76072	0.601187
AKR1C1	-0.262377	7.40755	-0.700251	0.490147	0.825354	-5.54637	0.833713
AKR1C2	-0.515813	8.0219	-1.15689	0.258102	0.680292	-5.12552	0.699399
AKR1C3	-0.239197	6.97302	-0.746109	0.462464	0.814514	-5.54333	0.847216
AKR1C4	-0.222451	-4.68852	-0.393646	0.697133	0.900893	-4.89788	0.857108
AKR1D1	-0.167738	-5.92827	-0.338753	0.737585	0.919019	-4.90064	0.890238
AKR1E2	0.0661892	1.85062	0.354287	0.726053	0.914311	-5.29119	1.04695
AKR7A2	-0.272913	5.0567	-2.28466	0.0309609	0.357846	-3.5941	0.827647
AKR7A3	0.178196	0.338044	0.50037	0.621131	0.867976	-5.05355	1.13147
AKT1	-0.393713	6.81855	-2.08551	0.0472405	0.399729	-3.92346	0.761168
AKT1S1	-0.234993	5.86901	-2.01325	0.05482	0.417133	-4.06887	0.849689
AKT2	-0.201741	7.60408	-1.31003	0.20193	0.626376	-4.98445	0.869501
AKT3	0.380472	6.13241	2.27809	0.0314043	0.358738	-3.61243	1.30177
AKTIP	0.0227055	5.22954	0.217617	0.82947	0.952516	-5.82275	1.01586
AL035460.1	-0.135907	-6.94733	-0.612903	0.545399	0.831095	-4.83385	0.910098
AL121594.1	-0.135907	-6.94733	-0.612903	0.545399	0.831095	-4.83385	0.910098
AL121753.1	-0.0748234	-6.78454	-0.215671	0.83097	0.953108	-4.91599	0.949458
AL139300.1	-0.135907	-6.94733	-0.612903	0.545399	0.831095	-4.83385	0.910098
AL160269.1	0.127823	-6.81525	0.443404	0.661234	0.886131	-4.87835	1.09264
AL357673.1	0.304607	2.22048	1.53389	0.137443	0.551548	-4.47397	1.23508
AL359922.1	-0.135907	-6.94733	-0.612903	0.545399	0.831095	-4.83385	0.910098
AL391650.1	-0.00391544	-6.88129	-0.0163261	0.987102	0.997402	-4.92759	0.99729
AL512428.1	-0.346144	-4.36944	-0.79145	0.436024	0.79943	-4.78104	0.786684
AL590560.1	-0.865679	-4.72554	-1.44004	0.16209	0.578863	-4.43407	0.548788
AL645922.1	-0.135907	-6.94733	-0.612903	0.545399	0.831095	-4.83385	0.910098
AL713999.1	-0.207619	-6.45434	-0.622308	0.539296	0.831095	-4.83137	0.865965
ALAD	-0.183488	5.94392	-1.25726	0.220117	0.645153	-5.1223	0.880571
ALAS1	-0.469764	5.83566	-2.61411	0.0148449	0.325996	-2.9931	0.722083
ALAS2	-1.5454	-0.907001	-2.30942	0.029341	0.353564	-3.638	0.342602
ALB	0.19842	-0.0710954	0.29221	0.772504	0.92981	-5.06759	1.14744
ALCAM	0.650523	4.41143	1.35272	0.188085	0.609386	-4.94688	1.56974
ALDH16A1	-0.172405	5.82892	-1.08178	0.289531	0.702274	-5.30918	0.887362
ALDH18A1	-0.35573	4.5365	-2.04474	0.0513936	0.408559	-3.97661	0.781474
ALDH1A1	0.575866	5.84389	2.51967	0.0184047	0.334249	-3.17317	1.49057
ALDH1A2	0.0862204	3.68218	0.26663	0.791911	0.93888	-5.63373	1.06159
ALDH1A3	-0.142771	4.16565	-0.372477	0.712634	0.908674	-5.67839	0.905778
ALDH1B1	-0.246968	4.44259	-0.84608	0.405423	0.779964	-5.44739	0.842666
ALDH1L1	-0.538338	6.65273	-0.864598	0.395366	0.774566	-5.47381	0.688564
ALDH1L2	0.262163	4.31774	1.12589	0.270758	0.691345	-5.18445	1.19928
ALDH2	-0.196742	9.11269	-0.527431	0.60248	0.857672	-5.52811	0.872519
ALDH3A1	0.113903	-0.112097	0.328499	0.745232	0.920645	-5.05626	1.08215
ALDH3A2	-0.0213118	6.66429	-0.11924	0.906025	0.972467	-5.81602	0.985336
ALDH3B1	0.068649	4.5348	0.334979	0.740397	0.919236	-5.73738	1.04873
ALDH3B2	-0.198383	-3.21461	-0.357474	0.723695	0.913588	-4.91804	0.871527
ALDH4A1	-0.47407	6.25629	-1.04331	0.306651	0.715954	-5.33597	0.719931
ALDH5A1	0.0505569	4.15238	0.195798	0.846329	0.956091	-5.72325	1.03566
ALDH6A1	0.0513403	6.0146	0.182688	0.856496	0.957901	-5.83553	1.03623
ALDH7A1	-0.0742433	5.47276	-0.588617	0.561326	0.838518	-5.68895	0.94984
ALDH8A1	0.238621	-0.210741	0.583139	0.564951	0.839787	-4.97277	1.17986
ALDH9A1	-0.289908	6.80576	-1.86217	0.074208	0.46027	-4.28152	0.817954
ALDOA	-0.269938	9.53479	-1.77071	0.0886336	0.485672	-4.29534	0.829355
ALDOB	-0.108979	-0.984106	-0.324192	0.748452	0.92192	-4.98419	0.927244
ALDOC	-0.130117	5.54173	-0.282039	0.780203	0.934192	-5.81646	0.913757
ALG1	-0.296617	3.32532	-2.32857	0.0281416	0.351075	-3.41923	0.814159
ALG10	0.0933761	0.82754	0.526377	0.603201	0.858013	-5.0973	1.06686
ALG10B	0.38093	1.30949	2.24034	0.0340655	0.36644	-3.55216	1.30218
ALG11	-0.188198	2.11011	-1.50755	0.144029	0.558863	-4.49417	0.877701
ALG12	0.0585859	3.58682	0.585413	0.563445	0.83891	-5.49434	1.04144
ALG13	0.151819	5.42116	1.32969	0.19546	0.619166	-5.03798	1.11097
ALG14	-0.472823	3.22719	-2.28527	0.0309199	0.357846	-3.48643	0.720553
ALG1L	-0.00675531	-3.31884	-0.0103892	0.991792	0.997402	-4.95072	0.995329
ALG1L2	0.0463896	-3.49644	0.0914834	0.927828	0.98099	-4.94677	1.03268
ALG2	-0.213993	4.40036	-1.74774	0.0926112	0.489778	-4.42471	0.862147
ALG3	-0.45216	4.76243	-2.37312	0.025522	0.346186	-3.42377	0.730948
ALG5	-0.216176	4.66631	-1.66411	0.108404	0.513668	-4.56583	0.860844
ALG6	0.232785	3.53057	1.69131	0.103036	0.504123	-4.41382	1.1751
ALG8	-0.322357	4.57368	-2.3577	0.0264021	0.348599	-3.44225	0.799762
ALG9	-0.0851668	5.5536	-0.604496	0.550886	0.833092	-5.6813	0.942676
ALK	-0.565476	-0.560899	-1.10425	0.279853	0.69741	-4.6834	0.675732
ALKBH1	0.0249865	3.59809	0.208931	0.836172	0.95448	-5.63171	1.01747
ALKBH2	-0.253301	3.71621	-1.72836	0.0960865	0.494148	-4.38338	0.838975
ALKBH3	-0.169309	4.18603	-1.63737	0.113907	0.523724	-4.56017	0.889268
ALKBH4	0.0363493	2.73257	0.303637	0.763882	0.926935	-5.45272	1.02552
ALKBH5	-0.0481217	6.23888	-0.424807	0.674561	0.891683	-5.7583	0.967195
ALKBH6	-0.103174	2.91885	-0.85147	0.40248	0.778911	-5.21374	0.930983
ALKBH7	-0.140139	5.02236	-0.995308	0.328992	0.731668	-5.37197	0.907432
ALKBH8	0.0633626	3.32627	0.517909	0.609012	0.861414	-5.48248	1.0449
ALLC	0.92399	-3.88552	1.31066	0.201723	0.626136	-4.51732	1.89735
ALMS1	0.264975	4.78149	2.34933	0.0268914	0.350368	-3.4675	1.20162
ALOX12	0.177062	0.448864	0.990736	0.331176	0.733163	-4.81784	1.13058
ALOX12B	-0.401013	-4.68929	-0.659883	0.515279	0.831095	-4.82683	0.757326
ALOX15	-1.09269	-4.68905	-1.50413	0.144905	0.55976	-4.39111	0.468885
ALOX15B	1.46529	1.78094	1.75687	0.0910122	0.488514	-4.18028	2.7612
ALOX5	-0.108318	4.55819	-0.429754	0.671005	0.890714	-5.70595	0.927669
ALOX5AP	-0.403593	3.94076	-1.51016	0.143366	0.558112	-4.70126	0.755973
ALOXE3	0.412237	-3.98962	0.697566	0.491797	0.826382	-4.81882	1.33075
ALPI	-0.706053	-6.46945	-1.73688	0.0945449	0.492283	-4.2286	0.612995
ALPK1	-0.0606236	4.79091	-0.353145	0.726899	0.914929	-5.75695	0.95885
ALPK2	0.375834	-0.112132	0.603408	0.551598	0.833232	-4.97351	1.29759
ALPK3	-0.52363	5.81434	-1.29202	0.208003	0.632093	-5.08446	0.695619
ALPL	-0.579674	4.63854	-1.38807	0.177194	0.597282	-4.92565	0.669115
ALPP	-0.633549	-6.56619	-1.46326	0.155684	0.570988	-4.4195	0.644589
ALS2	0.158574	5.11813	1.99675	0.0566946	0.419744	-4.08599	1.11618
ALS2CL	0.332438	5.48581	1.5042	0.144887	0.55976	-4.82171	1.25914
ALS2CR12	0.037152	-0.00799667	0.171948	0.864844	0.960323	-5.09226	1.02609
ALX1	0.686782	-4.41626	0.934407	0.358909	0.753914	-4.71959	1.60969
ALX3	-0.40016	-6.68317	-1.38527	0.178038	0.598606	-4.4694	0.757774
ALX4	0.0516529	0.254318	0.118346	0.906727	0.972467	-5.12521	1.03645
ALYREF	-0.624841	4.64703	-4.33943	0.000201138	0.310503	0.669328	0.648491
AMACR	0.136433	3.41276	0.78692	0.438623	0.801362	-5.34195	1.09918
AMBN	-0.0040715	-6.68779	-0.0111826	0.991165	0.997402	-4.92777	0.997182
AMBP	0.0719058	-3.86276	0.0929939	0.926639	0.980486	-4.94305	1.0511
AMBRA1	0.0714795	5.10751	0.633056	0.532367	0.831095	-5.64968	1.05079
AMD1	-0.15769	5.76274	-0.762599	0.45274	0.808252	-5.58081	0.896459
AMDHD1	-0.229965	-0.239126	-0.729892	0.472147	0.819004	-4.90973	0.852655
AMDHD2	0.456901	4.25281	2.64519	0.0138212	0.325996	-2.89639	1.37259
AMELX	0.058894	-6.45434	0.136602	0.892425	0.967302	-4.9234	1.04167
AMELY	-0.135907	-6.94733	-0.612903	0.545399	0.831095	-4.83385	0.910098
AMER1	0.106471	2.62232	0.749714	0.460328	0.813322	-5.23403	1.07659
AMER2	-1.3065	-3.17782	-1.89958	0.068922	0.449812	-4.08649	0.4043
AMER3	-0.10143	-5.44389	-0.177059	0.860869	0.959375	-4.92412	0.932109
AMFR	0.0144423	6.32471	0.145488	0.885476	0.966235	-5.83032	1.01006
AMH	0.112638	-1.65777	0.223028	0.825301	0.951252	-4.96248	1.0812
AMHR2	-0.248155	-3.05183	-0.539356	0.594347	0.852661	-4.87667	0.841972
AMIGO1	-0.10257	3.40102	-0.448858	0.657347	0.884649	-5.52555	0.931373
AMIGO2	-0.00403288	4.30051	-0.0176654	0.986044	0.997402	-5.76141	0.997209
AMIGO3	-0.135907	-6.94733	-0.612903	0.545399	0.831095	-4.83385	0.910098
AMMECR1	0.187813	3.14657	1.3376	0.192904	0.615562	-4.80262	1.13904
AMMECR1L	-0.111144	5.5335	-1.30157	0.204766	0.629995	-5.07277	0.925853
AMN	-1.44147	-1.0353	-2.5655	0.0165882	0.328061	-3.3798	0.368191
AMN1	0.162362	1.82042	0.982174	0.335294	0.737214	-4.95806	1.11912
AMOT	0.476077	3.4877	2.08302	0.0474851	0.399765	-3.83085	1.39096
AMOTL1	-0.19971	6.43232	-1.63549	0.114302	0.524771	-4.62956	0.870726
AMOTL2	0.121951	8.03157	0.605451	0.550261	0.832902	-5.56175	1.08821
AMPD1	-0.521617	-3.00727	-0.790285	0.436692	0.799638	-4.7906	0.69659
AMPD2	-0.153346	4.58953	-0.929127	0.361586	0.755023	-5.3956	0.899162
AMPD3	-0.00533825	3.85637	-0.0217201	0.982841	0.997402	-5.6953	0.996307
AMPH	0.141772	3.51513	0.358953	0.722603	0.912919	-5.57845	1.10326
AMT	0.305662	4.44546	1.51248	0.142779	0.557469	-4.75229	1.23599
AMTN	-0.135907	-6.94733	-0.612903	0.545399	0.831095	-4.83385	0.910098
AMY1A	0.0584313	-6.58642	0.167185	0.868551	0.960793	-4.92086	1.04133
AMY1B	-0.967832	-4.16634	-1.85536	0.0752084	0.461459	-4.12913	0.511274
AMY1C	-0.268211	-6.74921	-1.07436	0.292782	0.705553	-4.64599	0.830349
AMY2A	-0.856168	-2.28592	-0.869844	0.392547	0.773262	-4.76169	0.552418
AMY2B	0.64123	5.31765	2.78016	0.010097	0.323712	-2.66584	1.55966
AMZ1	0.469949	-2.10276	1.17465	0.25105	0.675024	-4.6044	1.38506
AMZ2	0.0567753	5.77288	0.623767	0.538353	0.831095	-5.67089	1.04014
ANAPC1	0.0426559	4.44735	0.488218	0.629591	0.872301	-5.66835	1.03001
ANAPC10	-0.105076	3.02094	-0.829631	0.414491	0.784391	-5.24624	0.929756
ANAPC11	-0.371177	5.33669	-2.7107	0.0118764	0.324497	-2.80311	0.773152
ANAPC13	-0.153032	5.45559	-1.18796	0.245858	0.668529	-5.19827	0.899358
ANAPC15	-0.380233	2.66322	-2.28304	0.03107	0.357846	-3.47005	0.768314
ANAPC16	0.0124743	6.66824	0.0830588	0.934457	0.983356	-5.81927	1.00868
ANAPC2	0.0553999	5.82504	0.540346	0.593674	0.852565	-5.71627	1.03915
ANAPC4	0.200291	5.07087	1.7669	0.089283	0.486279	-4.44145	1.14893
ANAPC5	-0.0216345	7.10643	-0.262401	0.795133	0.940358	-5.76255	0.985116
ANAPC7	-0.112576	5.38596	-1.38133	0.179233	0.599296	-4.97516	0.924935
ANG	0.0629075	3.60662	0.247823	0.806267	0.944662	-5.6251	1.04457
ANGEL1	0.185936	4.83665	1.24721	0.22372	0.647266	-5.10491	1.13755
ANGEL2	0.114053	5.29102	0.766432	0.450497	0.807297	-5.57092	1.08226
ANGPT1	0.116368	5.25459	0.557559	0.582035	0.847422	-5.69905	1.084
ANGPT2	0.0511767	4.95902	0.153953	0.878866	0.964299	-5.81821	1.03611
ANGPT4	0.868269	2.41855	1.89104	0.070099	0.451643	-4.03878	1.82547
ANGPTL1	0.206675	5.63887	0.550734	0.586637	0.849411	-5.71142	1.15403
ANGPTL2	-0.109381	8.12877	-0.527642	0.602335	0.8576	-5.59561	0.926986
ANGPTL3	1.42054	-3.66673	2.74351	0.0110021	0.323712	-3.32667	2.67685
ANGPTL4	-0.933761	8.24824	-3.92323	0.000591428	0.310503	-0.288527	0.523492
ANGPTL5	0.549439	1.90341	1.41205	0.170093	0.588411	-4.57946	1.46352
ANGPTL6	0.142776	-1.81011	0.39567	0.695658	0.900449	-4.92823	1.10403
ANGPTL7	0.673442	0.632684	0.731679	0.471074	0.818442	-4.98537	1.59487
ANHX	0.553604	-6.33737	1.27514	0.21382	0.637801	-4.53625	1.46775
ANK1	0.0319399	1.00438	0.0771722	0.939092	0.985062	-5.21785	1.02239
ANK2	-0.0867401	5.83645	-0.292299	0.772437	0.92981	-5.81407	0.941648
ANK3	0.149435	2.517	0.603272	0.551687	0.833268	-5.2998	1.10913
ANKAR	0.492686	2.32552	2.82707	0.00904093	0.321177	-2.58404	1.40706
ANKDD1A	0.120292	4.49307	0.519584	0.607861	0.861136	-5.65883	1.08695
ANKDD1B	-0.210011	-0.762581	-0.71332	0.482163	0.822709	-4.88032	0.864531
ANKEF1	-0.122126	2.39026	-0.38938	0.700246	0.901926	-5.36754	0.918833
ANKFN1	1.34847	-0.876518	3.33743	0.00261499	0.310503	-2.47915	2.54641
ANKFY1	0.223317	6.08467	3.42779	0.00208652	0.310503	-1.31971	1.16741
ANKH	0.128957	5.85526	1.27877	0.212561	0.637518	-5.09928	1.0935
ANKHD1	0.184233	7.12543	2.12646	0.0433728	0.388785	-3.84331	1.13621
ANKIB1	0.117581	5.78339	1.33792	0.192801	0.615429	-5.03094	1.08491
ANKK1	-0.109432	-1.26346	-0.374572	0.711093	0.907664	-4.95626	0.926953
ANKLE1	0.16077	0.252253	0.726342	0.474282	0.819822	-4.95217	1.11788
ANKLE2	-0.0538037	6.61263	-0.578724	0.567882	0.840864	-5.66762	0.963393
ANKMY1	0.109283	3.77065	1.00706	0.32342	0.728036	-5.22446	1.07869
ANKMY2	0.126277	4.53157	0.806293	0.427572	0.79477	-5.48719	1.09147
ANKRA2	0.362807	4.03073	2.294	0.0303408	0.355921	-3.52139	1.28593
ANKRD1	0.195463	-0.942799	0.317664	0.753342	0.92283	-4.98833	1.14509
ANKRD10	0.117403	6.95895	1.04162	0.30742	0.716788	-5.3026	1.08478
ANKRD11	0.0315336	6.87434	0.339467	0.737054	0.918904	-5.75555	1.0221
ANKRD12	0.235871	6.45048	1.94633	0.0627778	0.433717	-4.16359	1.17762
ANKRD13A	0.117022	5.60734	1.08518	0.288053	0.701648	-5.30612	1.08449
ANKRD13B	0.23451	3.78559	1.60714	0.120408	0.531214	-4.55681	1.17651
ANKRD13C	-0.0325149	4.7976	-0.362101	0.720277	0.912	-5.75451	0.977714
ANKRD13D	0.160999	4.9928	0.953322	0.349428	0.747549	-5.40757	1.11806
ANKRD16	-0.0374341	2.34715	-0.316331	0.754341	0.923188	-5.38182	0.974386
ANKRD17	0.0676993	6.77175	0.750495	0.459866	0.813052	-5.55227	1.04804
ANKRD18A	0.464978	-4.49381	0.666561	0.511073	0.831095	-4.82591	1.3803
ANKRD18B	0.5118	-5.7709	1.07417	0.292862	0.705553	-4.64711	1.42583
ANKRD2	-0.0131397	-1.93175	-0.0270449	0.978636	0.997402	-4.96767	0.990934
ANKRD20A1	-0.405146	-3.30276	-0.714066	0.481709	0.822674	-4.81798	0.75516
ANKRD20A2	-0.244999	-4.8725	-0.361693	0.720579	0.912089	-4.90264	0.843816
ANKRD20A3	0.409821	-3.47328	0.735701	0.468665	0.817205	-4.8087	1.32852
ANKRD20A4	0.473013	-3.01318	0.577892	0.568435	0.841138	-4.86574	1.38801
ANKRD20A8P	-2.43469	-4.42529	-2.80268	0.00957631	0.321994	-3.28762	0.184963
ANKRD22	-0.712107	-3.73746	-1.25988	0.219188	0.64433	-4.54868	0.610428
ANKRD23	0.455554	-0.918481	1.53742	0.136578	0.551009	-4.36048	1.37131
ANKRD24	0.189348	1.33341	0.681077	0.501996	0.831054	-5.08878	1.14025
ANKRD26	0.277446	3.63751	2.15474	0.0408701	0.384932	-3.7273	1.21205
ANKRD27	0.108354	5.03731	1.32539	0.196862	0.620706	-5.02838	1.078
ANKRD28	0.153322	6.30889	1.39417	0.175366	0.594305	-4.95111	1.11213
ANKRD29	0.170927	4.75559	0.679008	0.503285	0.831095	-5.59627	1.12578
ANKRD30A	0.0698173	-0.307773	0.118953	0.90625	0.972467	-5.06786	1.04958
ANKRD30B	-0.334737	-4.03493	-0.356581	0.724356	0.913717	-4.91058	0.792929
ANKRD30BL	-0.442677	-6.46945	-1.06441	0.297176	0.708577	-4.65115	0.735768
ANKRD31	0.316188	-1.61598	0.972791	0.339847	0.740911	-4.72183	1.24504
ANKRD33	0.422792	-4.08389	0.683815	0.500295	0.830874	-4.82294	1.34052
ANKRD33B	0.502322	-0.697085	1.09703	0.282939	0.698844	-4.68221	1.41649
ANKRD34A	0.149816	0.788895	0.729873	0.472158	0.819004	-5.00214	1.10943
ANKRD34B	-0.462587	-5.06846	-0.627239	0.536111	0.831095	-4.83501	0.725684
ANKRD34C	-0.103261	-3.96502	-0.123355	0.902799	0.971631	-4.94033	0.930926
ANKRD35	0.140673	2.90302	0.729061	0.472646	0.819606	-5.29362	1.10242
ANKRD36	0.548733	3.26323	2.29643	0.0301809	0.355184	-3.46978	1.4628
ANKRD36B	0.525892	1.73917	2.31531	0.0289673	0.351993	-3.42956	1.43982
ANKRD36C	0.75371	2.5281	2.24389	0.0338069	0.365642	-3.52867	1.68612
ANKRD37	0.07389	1.95745	0.183207	0.856093	0.95761	-5.34496	1.05255
ANKRD39	0.147778	2.30335	1.26592	0.21705	0.642202	-4.76884	1.10786
ANKRD40	-0.0653787	6.43019	-0.421916	0.676643	0.892683	-5.75097	0.955694
ANKRD42	0.169877	3.21218	1.48886	0.148859	0.565523	-4.63627	1.12496
ANKRD44	0.336349	2.78977	1.74917	0.0923596	0.489513	-4.25799	1.26256
ANKRD45	-0.47445	-3.15351	-0.87303	0.390841	0.772334	-4.75455	0.719741
ANKRD46	-0.150991	4.40368	-1.04177	0.30735	0.716788	-5.27569	0.900631
ANKRD49	0.192309	3.92597	1.77649	0.0876552	0.484592	-4.33727	1.14259
ANKRD50	0.26113	4.7904	1.38072	0.179417	0.599296	-4.94656	1.19842
ANKRD52	0.0728635	5.90735	0.757922	0.455485	0.810514	-5.5826	1.0518
ANKRD53	-0.81486	3.40171	-1.95527	0.0616594	0.430564	-4.02094	0.568464
ANKRD54	0.00279056	4.26405	0.0323779	0.974424	0.997402	-5.75619	1.00194
ANKRD55	0.0639788	-2.98865	0.153563	0.87917	0.964299	-4.94769	1.04534
ANKRD6	0.376287	3.36357	2.57724	0.0161504	0.328061	-2.98977	1.298
ANKRD60	-0.455157	-6.26085	-1.11554	0.275082	0.694631	-4.62504	0.729431
ANKRD61	-0.0535801	-0.838784	-0.181008	0.857801	0.958439	-5.01636	0.963542
ANKRD62	-0.0122652	-6.48967	-0.0305917	0.975835	0.997402	-4.92782	0.991534
ANKRD63	0.537332	-5.95194	1.03891	0.308653	0.718163	-4.66449	1.45129
ANKRD65	-0.263016	2.75793	-1.09184	0.285169	0.70044	-4.99337	0.833344
ANKRD66	-0.0587678	-6.29813	-0.119009	0.906206	0.972467	-4.92486	0.960084
ANKRD7	-1.10398	-4.26286	-1.81662	0.0811175	0.473509	-4.16033	0.465233
ANKRD9	-0.218928	3.01542	-0.923214	0.364599	0.756231	-5.17528	0.859204
ANKS1A	0.196398	6.10892	1.3149	0.200314	0.625553	-5.0525	1.14583
ANKS1B	0.122953	0.471801	0.335083	0.740319	0.919236	-5.11535	1.08896
ANKS3	0.0173271	4.14342	0.190141	0.850713	0.956445	-5.72298	1.01208
ANKS4B	0.374088	-5.42776	0.707964	0.485426	0.824099	-4.80633	1.29602
ANKS6	-0.0919605	4.87103	-0.786275	0.438994	0.801757	-5.5328	0.938247
ANKUB1	0.685776	-3.79182	1.3438	0.190917	0.612945	-4.49661	1.60857
ANKZF1	0.372338	5.29824	2.06411	0.0493813	0.406147	-3.98077	1.29445
ANLN	-0.303956	0.354334	-0.446252	0.659203	0.885288	-5.0727	0.810028
ANO1	-0.110867	4.69011	-0.459318	0.64992	0.882309	-5.70703	0.926031
ANO10	-0.155707	5.55973	-1.15194	0.260094	0.681491	-5.23787	0.897692
ANO2	0.138755	3.37362	0.564832	0.577152	0.843801	-5.46821	1.10095
ANO3	-0.418433	2.60769	-1.232	0.229254	0.652895	-4.8402	0.748237
ANO4	-0.268714	-0.0147955	-0.632896	0.532469	0.831095	-4.97021	0.830059
ANO5	0.569378	0.945923	1.46188	0.15606	0.571409	-4.46534	1.48388
ANO6	0.144027	7.63798	0.910282	0.371247	0.760989	-5.37701	1.10499
ANO7	-0.523162	-0.460164	-2.31746	0.0288314	0.351075	-3.58806	0.695845
ANO8	-0.070315	4.93587	-0.351581	0.728058	0.915217	-5.76911	0.95243
ANO9	0.132522	0.535325	0.350048	0.729194	0.915306	-5.11888	1.09621
ANP32A	-0.0741909	6.34101	-0.881688	0.386228	0.770352	-5.47519	0.949875
ANP32B	0.0129912	7.2731	0.101958	0.919592	0.977693	-5.77897	1.00905
ANP32D	-0.0800195	-6.01642	-0.170637	0.865864	0.960438	-4.92192	0.946045
ANP32E	-0.0242955	5.16412	-0.18719	0.853001	0.956667	-5.82546	0.983301
ANPEP	0.334175	7.15079	1.17208	0.25206	0.675467	-5.16179	1.26066
ANTXR1	0.337538	6.95998	1.46935	0.154038	0.569052	-4.82725	1.2636
ANTXR2	-0.0523817	7.62531	-0.191521	0.849643	0.956091	-5.74252	0.964343
ANTXRL	-0.585872	-3.72359	-0.686629	0.498549	0.830387	-4.82466	0.666247
ANXA1	-0.481781	9.17453	-2.26449	0.0323404	0.361836	-3.54223	0.716093
ANXA10	0.38596	-6.16714	0.809649	0.425676	0.79367	-4.76608	1.30673
ANXA11	-0.348589	8.44812	-3.13788	0.00427976	0.313267	-1.92615	0.785352
ANXA13	1.3455	-5.21202	2.32453	0.0283905	0.351075	-3.74279	2.54118
ANXA2	-0.381312	9.79008	-2.33695	0.0276304	0.351075	-3.40701	0.767739
ANXA2R	0.213041	1.98283	0.83449	0.411799	0.78336	-5.08339	1.15913
ANXA3	-0.24991	5.08787	-0.653905	0.519061	0.831095	-5.63602	0.840949
ANXA4	0.107762	6.1019	0.76336	0.452294	0.808252	-5.5742	1.07756
ANXA5	-0.329195	9.37385	-1.91991	0.0661883	0.441416	-4.08452	0.79598
ANXA6	-0.522277	8.99816	-2.75636	0.0106762	0.323712	-2.66772	0.696272
ANXA7	-0.183445	7.17999	-1.93306	0.0644703	0.437108	-4.15527	0.880598
ANXA8	-0.338996	-6.65246	-0.944465	0.353846	0.750509	-4.70839	0.790591
ANXA8L1	-1.65089	-5.36413	-3.4176	0.0021405	0.310503	-2.71651	0.318443
ANXA9	0.420836	0.978426	1.8214	0.0803675	0.472143	-4.08458	1.3387
AOAH	0.583554	2.28596	1.7851	0.0862157	0.481698	-4.1718	1.49854
AOC1	0.223345	-4.03668	0.317062	0.753793	0.922888	-4.91746	1.16744
AOC2	-0.264986	2.93379	-0.963889	0.344206	0.74359	-5.12975	0.832207
AOC3	-0.362673	9.44501	-1.40697	0.171577	0.589851	-4.77004	0.777722
AOX1	0.118969	7.91274	0.259067	0.797676	0.941226	-5.70835	1.08596
AP000350.4	-0.15867	-1.01704	-0.221264	0.826659	0.951405	-4.99838	0.89585
AP000351.3	-0.135907	-6.94733	-0.612903	0.545399	0.831095	-4.83385	0.910098
AP1AR	0.0321907	4.38141	0.264354	0.793644	0.939972	-5.73921	1.02256
AP1B1	-0.0229148	6.59903	-0.187038	0.85312	0.956682	-5.80984	0.984242
AP1G1	0.0218951	6.65462	0.238675	0.813277	0.946366	-5.79629	1.01529
AP1G2	0.390481	3.83338	2.45823	0.0211299	0.334335	-3.22065	1.31083
AP1M1	-0.327925	6.44629	-2.31818	0.0287865	0.351075	-3.5336	0.796681
AP1M2	-0.380652	-2.98655	-0.507105	0.616464	0.864916	-4.88604	0.76809
AP1S1	-0.217339	3.98992	-1.39215	0.175969	0.594881	-4.85265	0.860151
AP1S2	0.0490612	5.12034	0.318188	0.752949	0.92283	-5.7916	1.03459
AP1S3	0.524314	-0.4001	1.93691	0.0639762	0.436042	-3.98782	1.43825
AP2A1	-0.126646	7.06917	-1.08687	0.28732	0.701528	-5.25273	0.915958
AP2A2	0.111126	6.93881	0.981026	0.335849	0.737644	-5.35936	1.08007
AP2B1	0.0643184	7.62978	0.839997	0.408762	0.781808	-5.43338	1.04559
AP2M1	-0.219716	8.2579	-2.17997	0.0387473	0.379609	-3.71175	0.858734
AP2S1	-0.508085	5.92395	-3.0143	0.00577971	0.313267	-2.19339	0.703155
AP3B1	-0.0957564	5.72745	-1.18571	0.24673	0.669594	-5.20298	0.935781
AP3B2	0.0638266	0.95081	0.188784	0.851765	0.956647	-5.19997	1.04523
AP3D1	-0.159309	7.08279	-1.38073	0.179414	0.599296	-4.93059	0.895454
AP3M1	-0.142925	5.63705	-1.54795	0.134026	0.547225	-4.76525	0.905681
AP3M2	0.243243	4.49034	1.62024	0.117554	0.528392	-4.61253	1.18365
AP3S1	-0.0106679	6.08342	-0.11393	0.910191	0.973616	-5.84336	0.992633
AP3S2	-0.212023	6.04822	-1.78371	0.086447	0.481698	-4.42643	0.863326
AP4B1	0.126352	4.13801	0.856928	0.399512	0.777331	-5.40151	1.09153
AP4E1	0.0867204	4.34607	1.09229	0.284978	0.70044	-5.22092	1.06195
AP4M1	0.174136	3.85661	1.78357	0.08647	0.481698	-4.31981	1.12829
AP4S1	-0.0692979	1.91259	-0.582963	0.565068	0.839824	-5.21483	0.953102
AP5B1	-0.072774	3.2482	-0.374921	0.710837	0.907664	-5.52531	0.950808
AP5M1	-0.0550766	4.3815	-0.611156	0.546537	0.831122	-5.59776	0.962543
AP5S1	-0.549751	3.12399	-2.97416	0.0063668	0.316509	-2.26618	0.683138
AP5Z1	-0.0580512	5.57556	-0.612023	0.545973	0.831122	-5.67728	0.960561
APAF1	0.387846	4.14802	1.85882	0.0746983	0.461064	-4.2375	1.30844
APBA1	0.176066	3.30558	0.87622	0.389137	0.771444	-5.25916	1.1298
APBA2	-0.151388	0.491306	-0.421018	0.67729	0.892795	-5.09491	0.900384
APBA3	-0.0953126	3.6363	-0.575995	0.569696	0.841856	-5.50756	0.936069
APBB1	0.0588547	5.30234	0.46925	0.642901	0.879615	-5.74364	1.04164
APBB1IP	-0.379963	5.91806	-1.7726	0.088312	0.485393	-4.44521	0.768457
APBB2	-0.0012712	7.06289	-0.00822683	0.9935	0.997857	-5.79786	0.999119
APBB3	0.266599	5.22372	1.76268	0.090007	0.486661	-4.45371	1.20297
APC	0.177443	5.32175	1.88507	0.0709312	0.453799	-4.27018	1.13088
APC2	0.0773955	0.0226806	0.260585	0.796518	0.940563	-5.08269	1.05511
APCDD1	0.0292874	6.62848	0.0639253	0.949531	0.989309	-5.82287	1.02051
APCDD1L	0.179382	-2.01178	0.286383	0.776912	0.932478	-4.94384	1.1324
APCS	-0.0183534	-5.3905	-0.0286917	0.977335	0.997402	-4.93222	0.987359
APEH	-0.160747	5.65124	-1.17449	0.251113	0.675094	-5.21493	0.894562
APEX1	-0.235061	6.66977	-1.64039	0.113274	0.523654	-4.61287	0.849649
APEX2	-0.18485	4.19577	-1.59577	0.122932	0.534195	-4.61764	0.879741
APH1A	-0.067467	6.74248	-0.699646	0.490518	0.825459	-5.58819	0.954312
APH1B	0.380045	4.75948	3.4603	0.00192301	0.310503	-1.24991	1.30138
API5	-0.0652955	6.18443	-0.734112	0.469616	0.817648	-5.59186	0.95575
APIP	-0.334254	4.60759	-2.10247	0.0456033	0.39555	-3.88601	0.793194
APLF	0.246793	2.17582	1.37333	0.181673	0.60305	-4.64572	1.18657
APLN	-1.09235	0.976889	-1.24943	0.222921	0.647085	-4.66124	0.468996
APLNR	-1.30548	3.71927	-1.75152	0.0919473	0.489364	-4.35108	0.404586
APLP1	-0.171175	0.64825	-0.520536	0.607206	0.860892	-5.07934	0.888119
APLP2	0.100803	9.03203	0.91442	0.369111	0.759215	-5.28413	1.07237
APMAP	-0.19851	7.72445	-0.679989	0.502674	0.831095	-5.53838	0.87145
APOA1	-1.11269	-2.37791	-2.81075	0.0093958	0.321994	-3.22901	0.462431
APOA2	0.525413	-4.17416	0.876298	0.389096	0.771444	-4.74693	1.43935
APOA4	-0.0216987	-5.06673	-0.0259665	0.979487	0.997402	-4.93447	0.985072
APOA5	0.151778	-5.56364	0.27791	0.783335	0.935211	-4.91179	1.11094
APOB	-1.02742	3.15759	-1.25977	0.219228	0.64433	-4.88786	0.490587
APOBEC1	-0.0670493	-6.45434	-0.150781	0.881342	0.965004	-4.92237	0.954588
APOBEC2	0.64669	-2.92291	1.10014	0.281609	0.698567	-4.64311	1.56557
APOBEC3A	-0.552223	0.0682067	-1.50748	0.144048	0.558863	-4.39404	0.681969
APOBEC3B	-0.331065	-2.21785	-0.402995	0.69033	0.897772	-4.91884	0.79495
APOBEC3C	0.252853	4.35215	1.2692	0.215897	0.640184	-5.03652	1.19156
APOBEC3D	0.235806	1.38156	0.768051	0.449552	0.807053	-5.04741	1.17756
APOBEC3F	0.639333	0.847762	2.08047	0.0477371	0.401281	-3.77754	1.55761
APOBEC3G	0.48278	2.05097	1.73931	0.0941091	0.492004	-4.21565	1.39743
APOBEC3H	0.658905	-2.50393	1.12935	0.269322	0.690331	-4.62849	1.57888
APOBEC4	-0.532404	-6.55571	-1.16837	0.253528	0.676826	-4.59659	0.691402
APOBR	0.106284	2.51579	0.22507	0.823729	0.950538	-5.43189	1.07645
APOC1	-0.306973	3.58785	-0.576939	0.569069	0.841643	-5.49895	0.808336
APOC2	0.235942	-6.0425	0.569983	0.573706	0.843193	-4.8477	1.17768
APOC3	-0.661053	-3.97985	-0.8807	0.386753	0.770836	-4.74614	0.632417
APOC4	0.0850725	-5.31703	0.142208	0.88804	0.966389	-4.92774	1.06074
APOD	0.418983	10.0001	1.49062	0.1484	0.564716	-4.64419	1.33698
APOE	-0.113793	8.40548	-0.356309	0.724557	0.913717	-5.64604	0.924155
APOF	-0.079874	-5.06527	-0.136721	0.892331	0.967293	-4.92987	0.94614
APOH	0.621006	-4.7834	0.704944	0.487271	0.824914	-4.81083	1.53795
APOL1	-0.247592	5.41235	-1.5265	0.139265	0.554515	-4.79097	0.842301
APOL2	-0.476711	6.0632	-1.51863	0.141228	0.555563	-4.80002	0.718614
APOL3	0.111906	7.29912	0.68664	0.498542	0.830387	-5.56212	1.08066
APOL4	-1.15842	5.05445	-1.87354	0.0725659	0.456	-4.27899	0.448003
APOL5	-0.788212	-3.49121	-1.22443	0.232047	0.653821	-4.57045	0.579061
APOL6	-0.191332	7.30065	-0.757437	0.455771	0.810514	-5.5149	0.875797
APOLD1	-0.377582	8.28022	-0.965162	0.343581	0.742767	-5.28976	0.769726
APOM	0.0381063	1.19757	0.189305	0.851361	0.956647	-5.23229	1.02677
APOO	-0.368052	1.9672	-2.58804	0.0157571	0.327865	-3.00413	0.774828
APOOL	0.393762	1.11293	2.60983	0.014991	0.326288	-3.04947	1.31382
APOPT1	-0.101543	4.91774	-0.740914	0.465553	0.816273	-5.56838	0.932036
APP	0.0421039	9.0582	0.324293	0.748376	0.92192	-5.61029	1.02961
APPBP2	0.0540796	5.89196	0.643204	0.525867	0.831095	-5.65808	1.0382
APPL1	0.0103593	5.86183	0.118914	0.90628	0.972467	-5.84774	1.00721
APPL2	0.324137	6.29804	1.66726	0.107771	0.512968	-4.58964	1.25191
APRT	-0.426983	5.89431	-2.21171	0.0362179	0.371102	-3.73279	0.743816
APTX	-0.133223	4.30446	-1.8916	0.0700203	0.451643	-4.20149	0.911792
AQP1	0.219679	9.24974	0.862255	0.39663	0.774779	-5.31151	1.16447
AQP10	-0.499307	-4.58229	-0.778393	0.443542	0.804521	-4.78485	0.707446
AQP11	-0.244586	1.14312	-1.21363	0.236075	0.65868	-4.70412	0.844058
AQP12A	-0.430573	-6.27133	-1.10493	0.279567	0.69741	-4.63057	0.741967
AQP12B	-0.332125	-5.89836	-0.613235	0.545184	0.831095	-4.83545	0.794366
AQP2	-0.408836	-5.43608	-0.829236	0.41471	0.784391	-4.76042	0.753231
AQP3	-0.0244528	2.81781	-0.0733907	0.942071	0.986552	-5.50587	0.983193
AQP4	-0.452187	-1.6356	-0.75513	0.457129	0.811157	-4.82139	0.730934
AQP5	-0.215546	-3.63217	-0.337328	0.738647	0.919019	-4.9178	0.86122
AQP6	0.473972	-4.94086	0.737637	0.467508	0.816519	-4.79816	1.38893
AQP7	-0.30891	8.01	-1.05269	0.302413	0.712275	-5.22815	0.807251
AQP8	-0.0890134	-2.32076	-0.20813	0.83679	0.954752	-4.94938	0.940165
AQP9	-0.0760413	2.50472	-0.137074	0.892055	0.967293	-5.4435	0.948657
AQR	-0.0166946	5.52658	-0.206819	0.837803	0.955075	-5.83376	0.988495
AR	-0.136263	6.00957	-0.465696	0.645409	0.880234	-5.74847	0.909873
ARAF	-0.167898	6.3398	-1.56392	0.130233	0.542515	-4.73124	0.890139
ARAP1	0.180994	6.57446	1.02332	0.315822	0.722997	-5.34069	1.13367
ARAP2	0.335588	3.34505	1.87829	0.0718888	0.455503	-4.12991	1.26189
ARAP3	0.0239039	6.11633	0.143448	0.88707	0.966389	-5.83867	1.01671
ARC	-0.0609789	1.0294	-0.228551	0.821052	0.949618	-5.20394	0.958613
ARCN1	-0.252219	7.46613	-1.80701	0.0826441	0.475835	-4.33506	0.839604
AREG	-0.98746	-0.820806	-1.56573	0.12981	0.541615	-4.33724	0.504365
AREL1	-0.0617445	5.0488	-0.557473	0.582094	0.847439	-5.68854	0.958105
ARF1	-0.321982	8.46001	-3.10133	0.00467938	0.313267	-1.99941	0.79997
ARF3	-0.146415	6.88461	-1.57587	0.127452	0.538947	-4.6914	0.903493
ARF4	-0.439359	7.10282	-2.73109	0.0113257	0.323712	-2.7441	0.737462
ARF5	-0.285771	6.04541	-3.17985	0.00386133	0.313267	-1.84803	0.820303
ARF6	-0.22497	5.432	-1.98725	0.0577998	0.420943	-4.10989	0.855613
ARFGAP1	-0.161074	6.16884	-1.42508	0.16633	0.583334	-4.91742	0.894359
ARFGAP2	-0.0826888	6.53023	-0.793401	0.434907	0.799076	-5.53474	0.944296
ARFGAP3	-0.135668	5.81496	-1.14144	0.264352	0.684871	-5.2491	0.910248
ARFGEF1	0.103182	5.98083	1.28032	0.212022	0.637109	-5.09546	1.07414
ARFGEF2	0.151098	6.16461	1.46124	0.156234	0.571632	-4.87183	1.11041
ARFIP1	0.00243925	5.07846	0.0254447	0.979899	0.997402	-5.83704	1.00169
ARFIP2	-0.232906	5.05448	-2.31838	0.0287738	0.351075	-3.53393	0.850919
ARFRP1	-0.275982	5.12162	-2.52424	0.0182156	0.334249	-3.15753	0.825888
ARG1	-0.937329	0.309377	-2.67087	0.0130259	0.325547	-3.0695	0.522199
ARG2	-0.427409	-0.00907683	-1.2771	0.213141	0.637588	-4.58451	0.743596
ARGFX	-0.19752	-6.78454	-0.643649	0.525583	0.831095	-4.82439	0.872049
ARGLU1	0.31481	7.65755	2.13353	0.0427344	0.387667	-3.81106	1.24385
ARHGAP1	0.0130828	7.56796	0.130015	0.89758	0.969541	-5.75575	1.00911
ARHGAP10	0.397375	6.34031	1.92038	0.0661257	0.441386	-4.20832	1.31711
ARHGAP11A	-0.107921	1.57005	-0.318926	0.752395	0.92283	-5.25897	0.927924
ARHGAP11B	0.134609	0.954918	0.411276	0.684326	0.894604	-5.1515	1.0978
ARHGAP12	0.359723	5.52945	2.5744	0.0162554	0.328061	-3.069	1.28318
ARHGAP15	0.20956	2.85318	0.665936	0.511466	0.831095	-5.32284	1.15634
ARHGAP17	0.0368964	6.03275	0.367069	0.716614	0.910821	-5.78683	1.0259
ARHGAP18	-0.116666	5.09135	-0.686505	0.498626	0.830387	-5.61579	0.922317
ARHGAP19	0.403721	3.86753	2.7891	0.00988721	0.323712	-2.60985	1.32292
ARHGAP19-SLIT1	-0.135907	-6.94733	-0.612903	0.545399	0.831095	-4.83385	0.910098
ARHGAP20	0.201439	5.41328	0.754105	0.457734	0.811758	-5.5835	1.14984
ARHGAP21	0.218022	7.35367	1.65591	0.110068	0.517799	-4.55824	1.16314
ARHGAP22	0.168819	1.83088	0.41078	0.684685	0.894662	-5.27092	1.12414
ARHGAP23	-0.128673	5.83333	-0.921936	0.365253	0.756294	-5.45587	0.914673
ARHGAP24	0.0689598	5.03417	0.448204	0.657813	0.884755	-5.73939	1.04896
ARHGAP25	0.281363	4.2109	1.12089	0.272839	0.692634	-5.17686	1.21534
ARHGAP26	-0.0777735	5.62369	-0.530977	0.600056	0.856167	-5.72142	0.947519
ARHGAP27	0.0777693	5.51677	0.457424	0.651262	0.882589	-5.7545	1.05538
ARHGAP28	0.0686781	3.76568	0.293544	0.771496	0.929391	-5.64095	1.04876
ARHGAP29	0.181721	7.54396	1.23771	0.227166	0.651198	-5.06874	1.13424
ARHGAP30	0.0302126	4.59617	0.0983852	0.9224	0.978376	-5.79238	1.02116
ARHGAP31	-0.0966184	6.52839	-0.75482	0.457312	0.811245	-5.56254	0.935223
ARHGAP32	0.280427	4.94923	1.72797	0.0961563	0.494148	-4.49267	1.21455
ARHGAP33	0.504652	4.40571	2.9374	0.00695384	0.320636	-2.33227	1.41878
ARHGAP35	0.0117354	6.58359	0.0687591	0.945721	0.987881	-5.82507	1.00817
ARHGAP36	-0.677462	-5.03751	-0.866825	0.394168	0.774138	-4.74649	0.625264
ARHGAP39	-0.00229447	2.36861	-0.0138821	0.989033	0.997402	-5.42746	0.998411
ARHGAP4	-0.0764537	5.81471	-0.418901	0.678817	0.892923	-5.77149	0.948386
ARHGAP40	-1.14997	-5.38923	-1.7901	0.0853896	0.480368	-4.18624	0.450635
ARHGAP42	0.221325	4.23845	1.47571	0.152336	0.568372	-4.77857	1.1658
ARHGAP44	0.205213	2.86517	0.885777	0.384062	0.76886	-5.17974	1.15286
ARHGAP5	0.157707	6.17174	1.52324	0.140076	0.554862	-4.79103	1.11551
ARHGAP6	0.227512	5.28431	1.8657	0.0736957	0.459221	-4.29934	1.17081
ARHGAP8	0.697495	0.765215	1.53483	0.137213	0.551548	-4.38656	1.62169
ARHGAP9	0.276494	3.71667	0.873035	0.390838	0.772334	-5.32781	1.21125
ARHGDIA	-0.399339	7.36815	-2.79614	0.00972471	0.321994	-2.61216	0.758206
ARHGDIB	-0.0701928	6.97226	-0.333868	0.741225	0.919357	-5.75115	0.952511
ARHGDIG	-0.0428314	-0.115642	-0.100684	0.920593	0.977693	-5.08779	0.970748
ARHGEF1	0.0551052	7.23409	0.518354	0.608706	0.86131	-5.66047	1.03893
ARHGEF10	0.14141	6.14734	1.32895	0.195701	0.619392	-5.03488	1.10298
ARHGEF10L	0.22076	6.17467	1.99305	0.0571225	0.420142	-4.09652	1.16535
ARHGEF11	0.162978	6.39514	2.16807	0.0397356	0.383544	-3.79821	1.1196
ARHGEF12	0.17493	7.40114	1.73864	0.094229	0.492139	-4.43842	1.12891
ARHGEF15	-0.19309	7.07962	-1.33008	0.195335	0.618927	-4.99089	0.87473
ARHGEF16	-0.458229	3.08522	-1.22061	0.233467	0.655393	-4.91784	0.727879
ARHGEF17	0.0200026	7.50147	0.13471	0.893905	0.968013	-5.75975	1.01396
ARHGEF18	-0.0305526	5.06394	-0.345227	0.732772	0.917092	-5.77987	0.979045
ARHGEF19	-0.3283	2.73936	-1.65384	0.11049	0.518482	-4.37737	0.796475
ARHGEF2	-0.130428	6.82229	-0.798659	0.431907	0.797925	-5.51483	0.91356
ARHGEF25	0.203809	4.41536	0.929779	0.361254	0.75479	-5.3767	1.15174
ARHGEF26	-0.234562	4.77507	-0.696626	0.492375	0.826382	-5.58671	0.849943
ARHGEF28	0.253598	4.38874	1.02314	0.315906	0.722997	-5.29132	1.19218
ARHGEF3	-0.0565812	4.92033	-0.270086	0.78928	0.938045	-5.79192	0.96154
ARHGEF33	0.370872	-0.696534	1.20358	0.23987	0.661606	-4.61263	1.29313
ARHGEF35	0.208227	-0.408909	0.330239	0.743933	0.920298	-5.0286	1.15527
ARHGEF37	0.274905	3.67667	0.92748	0.362423	0.755517	-5.27815	1.20991
ARHGEF38	0.568664	-5.20069	0.921522	0.365464	0.756356	-4.72192	1.48315
ARHGEF39	0.059959	2.89309	0.329738	0.744307	0.92045	-5.4746	1.04244
ARHGEF4	-0.0331972	3.31209	-0.11694	0.907829	0.972901	-5.59381	0.977252
ARHGEF40	-0.00313368	7.13313	-0.0254854	0.979867	0.997402	-5.79296	0.99783
ARHGEF5	0.0420513	2.03017	0.297981	0.768146	0.928289	-5.3341	1.02958
ARHGEF6	-0.0995004	6.85209	-0.404449	0.689274	0.897199	-5.73415	0.933356
ARHGEF7	0.0495893	7.43554	0.377938	0.708622	0.906588	-5.70581	1.03497
ARHGEF9	0.247967	4.24454	1.55992	0.131175	0.54334	-4.6704	1.18753
ARID1A	0.0331679	6.81918	0.362092	0.720284	0.912	-5.75145	1.02326
ARID1B	0.141234	6.4522	1.36886	0.183051	0.605208	-4.97623	1.10285
ARID2	0.210554	5.01709	1.97348	0.059434	0.424903	-4.11953	1.15713
ARID3A	0.0456796	4.33746	0.239706	0.812485	0.946032	-5.73946	1.03217
ARID3B	0.24959	2.97936	1.72678	0.0963735	0.494617	-4.30598	1.18887
ARID3C	0.298838	-3.91337	0.610895	0.546707	0.831122	-4.84829	1.23015
ARID4A	0.414095	5.53946	3.13991	0.00425858	0.313267	-1.93256	1.33246
ARID4B	0.268663	5.78621	2.65287	0.0135788	0.325996	-2.91832	1.20469
ARID5A	-0.169165	5.59468	-0.821687	0.418915	0.787575	-5.537	0.889357
ARID5B	0.0394676	7.25804	0.168449	0.867567	0.96062	-5.77151	1.02773
ARIH1	0.0191383	6.37554	0.210336	0.835087	0.954236	-5.81698	1.01335
ARIH2	-0.0288544	6.32855	-0.335348	0.740122	0.919236	-5.78675	0.980198
ARIH2OS	0.360845	1.07281	2.216	0.0358874	0.370411	-3.59551	1.28418
ARL1	-0.20608	5.84647	-1.85803	0.0748142	0.461064	-4.31627	0.86689
ARL10	0.399188	3.73331	1.89633	0.069368	0.450793	-4.14114	1.31877
ARL11	0.117326	0.800175	0.339248	0.737217	0.918904	-5.15235	1.08472
ARL13A	0.418291	-3.76623	0.772419	0.447007	0.805934	-4.79252	1.33634
ARL13B	-0.03306	3.51034	-0.318601	0.752639	0.92283	-5.58998	0.977345
ARL14	-0.247313	-6.31129	-0.58945	0.560776	0.838518	-4.84145	0.842464
ARL14EP	0.017679	4.28551	0.174451	0.862897	0.959725	-5.74528	1.01233
ARL14EPL	-0.630565	-3.96912	-0.886902	0.383468	0.768447	-4.74347	0.645923
ARL15	0.108512	4.23612	0.657893	0.516536	0.831095	-5.55202	1.07812
ARL16	0.13249	4.52781	1.11099	0.276999	0.696974	-5.2218	1.09618
ARL17A	0.618485	0.618701	1.79558	0.0844915	0.47829	-4.11291	1.53526
ARL17B	0.243633	-0.0435945	0.535399	0.597039	0.854762	-5.00458	1.18397
ARL2	-0.196712	6.24126	-1.56607	0.12973	0.541615	-4.7317	0.872537
ARL2BP	-0.178975	5.57168	-1.86436	0.0738901	0.459827	-4.30656	0.88333
ARL3	0.129408	4.52185	1.29864	0.205756	0.630609	-5.02047	1.09384
ARL4A	-0.104781	4.56481	-0.565191	0.576912	0.843801	-5.64369	0.929946
ARL4C	0.441294	4.45644	1.73846	0.0942617	0.492151	-4.44293	1.35782
ARL4D	-0.648389	2.91583	-2.03098	0.052867	0.410861	-3.86887	0.637992
ARL5A	-0.100068	5.34414	-0.937534	0.35733	0.752923	-5.43774	0.932989
ARL5B	0.178945	4.83147	0.855535	0.400269	0.777757	-5.4773	1.13206
ARL5C	0.307059	-5.50234	0.462223	0.647863	0.881466	-4.87769	1.23718
ARL6	0.0163005	1.18866	0.100649	0.92062	0.977693	-5.2408	1.01136
ARL6IP1	0.0280441	7.47978	0.16925	0.866943	0.96062	-5.7563	1.01963
ARL6IP4	-0.147943	6.41626	-1.5341	0.137391	0.551548	-4.76827	0.902537
ARL6IP5	-0.129196	7.45292	-0.923207	0.364602	0.756231	-5.37798	0.914341
ARL6IP6	0.252604	4.189	1.52348	0.140016	0.554862	-4.71225	1.19136
ARL8A	-0.190746	5.56645	-1.5177	0.141462	0.555766	-4.80496	0.876152
ARL8B	-0.0298416	6.50016	-0.307767	0.760774	0.926013	-5.78689	0.979528
ARL9	1.38261	-4.00218	2.16642	0.0398746	0.383544	-3.86741	2.6074
ARMC1	-0.0821382	4.84021	-0.87657	0.388951	0.771444	-5.46121	0.944657
ARMC10	-0.0159397	4.76019	-0.184646	0.854976	0.957063	-5.79704	0.989012
ARMC12	0.379838	0.493657	1.08768	0.28697	0.70126	-4.75446	1.3012
ARMC2	-0.040864	2.39648	-0.285106	0.777879	0.933026	-5.39813	0.972073
ARMC3	-0.469262	-5.54366	-0.896995	0.37816	0.766202	-4.73152	0.722334
ARMC4	0.992854	-3.40904	1.46607	0.154922	0.570457	-4.41596	1.99012
ARMC5	-0.281029	3.75309	-2.35313	0.0266686	0.349846	-3.40114	0.823004
ARMC6	-0.553033	4.17543	-3.35981	0.00247314	0.310503	-1.46801	0.681586
ARMC7	0.166076	3.24788	1.09764	0.282679	0.698809	-5.062	1.122
ARMC8	-0.220562	6.0229	-1.21033	0.237317	0.659486	-5.17268	0.858231
ARMC9	0.287006	2.0617	1.0514	0.302995	0.712593	-4.93328	1.22011
ARMCX1	0.247322	5.10797	1.47811	0.151694	0.568372	-4.84386	1.187
ARMCX2	0.304808	4.163	1.54797	0.134022	0.547225	-4.67756	1.23525
ARMCX3	-0.0068091	6.10874	-0.0671452	0.946993	0.988441	-5.84659	0.995291
ARMCX4	0.371488	4.58241	2.22442	0.0352476	0.367773	-3.67739	1.29369
ARMCX5	0.12956	3.33554	1.07265	0.293532	0.705681	-5.0987	1.09396
ARMCX6	0.0401535	3.11605	0.238878	0.813121	0.946331	-5.53824	1.02822
ARMS2	0.370759	-3.09003	0.590669	0.559971	0.83837	-4.86124	1.29303
ARNT	0.162433	6.55802	1.65547	0.110156	0.517815	-4.5965	1.11917
ARNT2	0.545567	1.34439	1.10519	0.279456	0.69741	-4.81103	1.45959
ARNTL	-0.15826	5.45638	-0.519148	0.60816	0.861136	-5.7249	0.896105
ARNTL2	-0.247076	2.55346	-0.823696	0.417794	0.78683	-5.17456	0.842602
ARPC1A	-0.16255	6.2361	-1.45982	0.15662	0.57175	-4.87146	0.893445
ARPC1B	-0.287482	6.27234	-1.35927	0.186031	0.60713	-4.9948	0.819331
ARPC2	-0.206684	8.07238	-1.93499	0.064222	0.436576	-4.11361	0.866526
ARPC3	-0.122808	7.09614	-1.12834	0.269739	0.69067	-5.20992	0.918398
ARPC4	-0.209838	6.85257	-2.33271	0.0278883	0.351075	-3.49539	0.864634
ARPC5	-0.163576	6.86239	-1.16605	0.254446	0.677661	-5.18441	0.892809
ARPC5L	-0.556266	5.028	-4.70615	7.72867e-05	0.310503	1.50676	0.68006
ARPP19	-0.0374852	7.3386	-0.381777	0.705808	0.905223	-5.71099	0.974352
ARPP21	-0.469448	-2.78221	-0.524766	0.604305	0.858867	-4.88292	0.722241
ARR3	0.699441	-3.60402	1.36564	0.184047	0.606075	-4.48279	1.62388
ARRB1	-0.355684	5.78395	-2.16459	0.0400289	0.383544	-3.8152	0.781499
ARRB2	0.242432	5.76362	0.980756	0.33598	0.737725	-5.40484	1.18299
ARRDC1	0.0619613	5.31432	0.483901	0.632609	0.873849	-5.73746	1.04388
ARRDC2	0.269067	6.93525	1.17763	0.249879	0.67351	-5.16825	1.20503
ARRDC3	-0.0805234	6.07824	-0.224342	0.824289	0.950803	-5.82571	0.945714
ARRDC4	-0.0233692	4.39242	-0.100783	0.920516	0.977693	-5.76863	0.983932
ARRDC5	0.353106	-2.21019	0.830878	0.413799	0.784223	-4.7796	1.27731
ARSA	0.107898	5.6114	0.935668	0.358272	0.753405	-5.44448	1.07766
ARSB	0.0907371	3.97655	0.62809	0.535563	0.831095	-5.53313	1.06491
ARSD	0.0327468	5.41925	0.145797	0.885235	0.966171	-5.84189	1.02296
ARSE	1.49143	-3.56146	2.61386	0.0148534	0.325996	-3.44921	2.81168
ARSF	-0.0214191	-5.94526	-0.0381029	0.969904	0.996085	-4.9292	0.985263
ARSG	-0.0161758	2.76523	-0.100861	0.920454	0.977693	-5.49415	0.98885
ARSH	0.38201	-6.4943	0.955605	0.348296	0.746387	-4.70343	1.30316
ARSI	0.147806	-0.771007	0.301841	0.765235	0.927312	-5.00411	1.10788
ARSJ	0.0804115	1.3685	0.264025	0.793895	0.940037	-5.24281	1.05732
ARSK	0.446269	2.78653	3.34022	0.00259686	0.310503	-1.60929	1.36251
ART1	0.221669	-6.04713	0.453735	0.65388	0.883259	-4.87736	1.16608
ART3	0.882001	-1.01648	2.05941	0.0498633	0.40752	-3.89757	1.84293
ART4	0.744122	0.729204	1.94096	0.0634586	0.43543	-3.94795	1.67496
ART5	1.41863	-2.0095	2.61584	0.014786	0.325996	-3.41078	2.67331
ARTN	-0.254256	-1.14634	-0.553424	0.584821	0.848642	-4.91565	0.838419
ARV1	-0.0824057	3.48794	-0.783791	0.440424	0.802243	-5.35663	0.944481
ARVCF	0.135795	3.92833	0.574507	0.570688	0.842061	-5.55526	1.0987
ARX	0.0615815	-5.57741	0.13067	0.897068	0.969373	-4.92698	1.04361
AS3MT	0.587673	2.36515	2.43819	0.0220962	0.334335	-3.22401	1.50282
ASAH1	0.290903	8.44215	1.79567	0.0844762	0.47829	-4.30643	1.22341
ASAH2	-0.495905	-1.97594	-1.36142	0.185358	0.606877	-4.48738	0.709117
ASAH2B	-0.0135908	0.669029	-0.0716406	0.94345	0.986973	-5.17604	0.990624
ASAP1	0.168022	7.04233	1.23528	0.228051	0.651722	-5.10029	1.12352
ASAP2	0.223335	4.74845	1.5658	0.129793	0.541615	-4.70706	1.16743
ASAP3	0.233584	5.76969	1.60673	0.120498	0.53148	-4.68509	1.17575
ASB1	0.0507425	5.12681	0.518601	0.608536	0.861136	-5.71265	1.0358
ASB10	0.803529	-5.39347	1.49754	0.146601	0.562343	-4.39627	1.74537
ASB11	0.742462	-4.01868	1.21881	0.234137	0.655955	-4.57242	1.67303
ASB12	-0.00224695	-6.55571	-0.00600134	0.995259	0.998148	-4.92794	0.998444
ASB13	-0.0245997	4.85131	-0.0984167	0.922375	0.978376	-5.81652	0.983093
ASB14	0.406441	0.830582	1.97762	0.0589388	0.424737	-3.90279	1.32541
ASB15	0.00290258	-5.56974	0.00544909	0.995695	0.998148	-4.93136	1.00201
ASB16	0.30435	-0.0624102	1.71526	0.0984964	0.498055	-4.19918	1.23486
ASB17	0.617295	-6.30478	1.19874	0.241715	0.663374	-4.57998	1.534
ASB18	-0.154231	-6.49827	-0.344247	0.7335	0.917341	-4.8982	0.898612
ASB2	-0.0516467	0.590035	-0.0860039	0.932139	0.982733	-5.16577	0.964834
ASB4	-0.746335	-2.68757	-1.39264	0.175822	0.594755	-4.46565	0.596116
ASB5	0.300702	-3.58738	0.354134	0.726167	0.914329	-4.91519	1.23174
ASB6	-0.28841	3.93182	-2.85522	0.00845819	0.321177	-2.48404	0.818804
ASB7	0.134285	3.73232	1.32166	0.198083	0.622198	-4.90129	1.09755
ASB8	-0.0415733	4.97122	-0.591826	0.559208	0.83785	-5.66495	0.971595
ASB9	0.153698	0.838783	0.549025	0.587792	0.849885	-5.08984	1.11242
ASCC1	0.0708468	4.58128	0.673801	0.506535	0.831095	-5.58287	1.05033
ASCC2	-0.287716	6.14441	-3.56201	0.00148802	0.310503	-1.02891	0.819198
ASCC3	-0.0134185	4.89236	-0.106098	0.916339	0.976123	-5.81905	0.990742
ASCL1	-0.248419	-4.5496	-0.356205	0.724634	0.913717	-4.90618	0.841819
ASCL2	0.687908	-1.42322	1.39943	0.1738	0.591619	-4.4634	1.61095
ASCL3	0.0552838	-6.42314	0.117948	0.907039	0.972567	-4.92465	1.03906
ASCL4	0.772118	-4.8361	0.972288	0.340093	0.740987	-4.7	1.70777
ASCL5	0.342004	-4.51154	0.848637	0.404025	0.779709	-4.75686	1.26752
ASF1A	0.0602126	3.38879	0.456209	0.652124	0.882589	-5.5204	1.04262
ASF1B	-0.401367	-0.0950568	-0.740219	0.465967	0.816396	-4.91619	0.757141
ASGR1	-0.295384	0.327577	-1.00595	0.323945	0.728369	-4.79876	0.814855
ASGR2	0.0195044	-0.0723133	0.0521958	0.958782	0.992427	-5.09457	1.01361
ASH1L	0.237601	6.76391	2.04541	0.0513233	0.408531	-3.99184	1.17903
ASH2L	-0.168194	5.66757	-1.02008	0.317328	0.724891	-5.36897	0.889956
ASIC1	0.186898	0.639526	0.432261	0.669206	0.889747	-5.10802	1.13831
ASIC2	0.326935	-5.27952	0.561564	0.579344	0.845386	-4.85336	1.25435
ASIC3	0.131415	1.88327	0.561942	0.57909	0.845083	-5.22011	1.09537
ASIC4	0.0297198	-2.24043	0.053649	0.957635	0.992059	-4.96145	1.02081
ASIC5	-0.135907	-6.94733	-0.612903	0.545399	0.831095	-4.83385	0.910098
ASIP	0.870167	-2.05114	1.3275	0.196172	0.620054	-4.5096	1.82787
ASL	-0.148965	5.05181	-1.23827	0.226959	0.651047	-5.1285	0.901897
ASMT	-0.135907	-6.94733	-0.612903	0.545399	0.831095	-4.83385	0.910098
ASMTL	-0.135907	-6.94733	-0.612903	0.545399	0.831095	-4.83385	0.910098
ASNA1	-0.200572	5.552	-1.61374	0.118963	0.529929	-4.67477	0.870206
ASNS	0.103427	4.24888	0.536474	0.596307	0.854202	-5.62059	1.07432
ASNSD1	-0.0332522	5.26842	-0.280427	0.781425	0.934657	-5.80951	0.977215
ASPA	0.366182	3.60785	1.05692	0.300516	0.710891	-5.15496	1.28894
ASPDH	0.654458	-2.63427	1.44429	0.160902	0.577127	-4.43067	1.57402
ASPG	-0.139713	-0.67499	-0.203838	0.840108	0.955348	-5.02682	0.9077
ASPH	-0.0566824	8.73571	-0.268271	0.790662	0.938638	-5.64798	0.961473
ASPHD1	0.370093	-1.09819	0.578777	0.567847	0.840864	-4.91023	1.29244
ASPHD2	-0.00177596	0.131875	-0.00749051	0.994082	0.997892	-5.11669	0.99877
ASPM	-0.212689	-0.420927	-0.298897	0.767455	0.928151	-5.03373	0.862927
ASPN	0.638117	4.00763	1.4772	0.151938	0.568372	-4.75076	1.5563
ASPRV1	0.180639	1.80763	1.10793	0.278291	0.69741	-4.85638	1.13339
ASPSCR1	-0.231907	4.56642	-1.95521	0.0616661	0.430564	-4.12269	0.851509
ASRGL1	-0.389906	3.37371	-1.78552	0.086146	0.481698	-4.2659	0.76318
ASS1	-0.48457	8.04778	-2.04604	0.0512564	0.408531	-3.93933	0.71471
ASTE1	0.0935009	2.6951	0.610205	0.547157	0.831122	-5.32619	1.06696
ASTL	0.203252	-4.45862	0.321526	0.750447	0.922365	-4.91297	1.15129
ASTN1	-0.91497	-2.82638	-1.51275	0.142709	0.557469	-4.38295	0.530355
ASTN2	-0.260649	1.12819	-1.27739	0.213037	0.637588	-4.64766	0.834712
ASXL1	0.107058	7.33693	1.08905	0.286375	0.700982	-5.23469	1.07703
ASXL2	0.151758	5.40697	1.87394	0.072509	0.455984	-4.28947	1.11092
ASXL3	0.513408	0.790568	1.50254	0.145313	0.56039	-4.41914	1.42742
ASZ1	-0.136124	-6.81525	-0.498297	0.62257	0.868811	-4.86547	0.90996
ATAD1	0.0200433	5.45176	0.229117	0.820616	0.949529	-5.82776	1.01399
ATAD2	0.224634	3.73796	1.46672	0.154748	0.570155	-4.73083	1.16848
ATAD2B	0.159369	4.66628	1.23172	0.229356	0.652895	-5.10842	1.1168
ATAD3A	-0.414413	4.28186	-2.65515	0.0135076	0.325996	-2.87871	0.750325
ATAD3B	-0.25265	4.31397	-1.38211	0.178993	0.599296	-4.9018	0.839353
ATAD3C	0.199876	0.377923	0.567264	0.575523	0.843548	-5.03329	1.1486
ATAD5	0.33172	2.12529	1.17819	0.249663	0.673175	-4.83118	1.25851
ATAT1	0.069815	3.27663	0.587382	0.562142	0.838518	-5.43963	1.04958
ATCAY	-0.475619	-2.96021	-0.797072	0.432811	0.798072	-4.78814	0.719158
ATE1	0.0263638	5.06231	0.324531	0.748199	0.92192	-5.78634	1.01844
ATF1	-0.041204	4.34581	-0.388594	0.700821	0.902225	-5.69678	0.971844
ATF2	0.143788	5.78588	1.52472	0.139707	0.554862	-4.79607	1.1048
ATF3	-0.0920178	5.57127	-0.192466	0.84891	0.956091	-5.83713	0.93821
ATF4	-0.131694	9.07695	-1.09982	0.281744	0.698567	-5.11785	0.912759
ATF5	-0.800908	5.37025	-2.59723	0.0154298	0.327267	-3.02366	0.573988
ATF6	-0.0281899	5.8713	-0.272634	0.787343	0.937151	-5.8189	0.98065
ATF6B	0.141086	6.2098	1.85386	0.07543	0.461816	-4.31591	1.10274
ATF7	0.191786	6.41847	1.62607	0.116302	0.526961	-4.64321	1.14218
ATF7IP	0.374264	5.37736	3.03729	0.00546714	0.313267	-2.1453	1.29618
ATF7IP2	0.153289	2.21531	0.801805	0.430117	0.796804	-5.13771	1.1121
ATG10	0.0927548	2.67131	0.743931	0.463757	0.814985	-5.24565	1.0664
ATG12	0.04465	5.7119	0.514883	0.611095	0.862889	-5.72955	1.03143
ATG13	0.0187556	6.3929	0.187189	0.853002	0.956667	-5.82053	1.01309
ATG14	0.314575	5.38483	2.30331	0.0297336	0.354458	-3.56925	1.24364
ATG16L1	-0.0453099	4.98983	-0.685771	0.499081	0.83044	-5.6101	0.969082
ATG16L2	0.564989	5.30198	2.23813	0.0342275	0.36644	-3.68317	1.47938
ATG2A	0.0815415	5.62728	0.520168	0.607459	0.861053	-5.72682	1.05815
ATG2B	0.271208	6.11857	2.13978	0.0421777	0.386893	-3.8535	1.20682
ATG3	-0.237733	5.37883	-2.69098	0.012433	0.32465	-2.84227	0.848077
ATG4A	-0.15007	3.82777	-1.58205	0.126034	0.536841	-4.59488	0.901207
ATG4B	-0.00874913	5.72214	-0.0908177	0.928351	0.981261	-5.85158	0.993954
ATG4C	0.147964	3.4165	1.22494	0.231857	0.653821	-4.96168	1.108
ATG4D	-0.23624	3.50637	-2.07476	0.0483058	0.403457	-3.84542	0.848955
ATG5	-0.0156539	5.00286	-0.199084	0.843785	0.956091	-5.81372	0.989208
ATG7	-0.00954527	4.56803	-0.0820861	0.935223	0.983875	-5.79075	0.993406
ATG9A	-0.0874084	6.37775	-0.668972	0.50956	0.831095	-5.62673	0.941212
ATG9B	-0.524814	0.259928	-2.03444	0.0524929	0.410171	-3.8553	0.695049
ATIC	-0.295139	5.54446	-1.96212	0.0608137	0.428529	-4.15189	0.814994
ATL1	0.401569	2.36463	2.05505	0.0503136	0.408324	-3.80616	1.32094
ATL2	0.0523602	5.49875	0.337181	0.738756	0.919019	-5.79954	1.03696
ATL3	-0.0188136	7.45003	-0.186718	0.853368	0.956753	-5.75542	0.987044
ATM	0.4651	5.89128	3.16375	0.00401702	0.313267	-1.88249	1.38041
ATMIN	-0.158165	5.90415	-1.2842	0.210685	0.6352	-5.09239	0.896164
ATN1	0.0413077	8.58471	0.352077	0.72769	0.915217	-5.63477	1.02905
ATOH1	-0.3915	-6.45385	-0.869427	0.392771	0.773332	-4.7413	0.762336
ATOH7	0.251755	-2.99468	0.399367	0.692967	0.8991	-4.91165	1.19065
ATOH8	0.158161	6.4698	0.522148	0.6061	0.860133	-5.70441	1.11586
ATOX1	-0.302847	4.86537	-2.23929	0.0341418	0.36644	-3.66629	0.810651
ATP10A	-0.257548	5.30964	-0.59938	0.554239	0.834917	-5.67833	0.836508
ATP10B	0.334177	-3.25772	0.433082	0.668617	0.889619	-4.90196	1.26066
ATP10D	0.341868	4.78144	2.50521	0.019015	0.334249	-3.18202	1.2674
ATP11A	0.126699	5.46157	1.15258	0.259834	0.681422	-5.23576	1.09179
ATP11B	0.116116	6.02539	0.948741	0.351709	0.748916	-5.42937	1.08381
ATP11C	0.191675	5.34981	1.86303	0.0740829	0.459943	-4.30512	1.14209
ATP12A	0.127906	-6.48967	0.281667	0.780485	0.934272	-4.90805	1.09271
ATP13A1	0.0195608	6.00378	0.261318	0.795959	0.940563	-5.81914	1.01365
ATP13A2	-0.259164	5.24999	-1.92591	0.0654002	0.439788	-4.20407	0.835572
ATP13A3	-0.405899	7.07383	-2.09441	0.0463746	0.398049	-3.89883	0.754766
ATP13A4	0.287932	-2.26971	0.691478	0.495549	0.82883	-4.83442	1.22089
ATP13A5	0.666674	-6.1571	1.2245	0.232019	0.653821	-4.56557	1.58741
ATP1A1	-0.143865	7.92495	-0.778007	0.443765	0.804692	-5.45981	0.905091
ATP1A2	0.137185	7.17249	0.385036	0.703422	0.903552	-5.72086	1.09976
ATP1A3	-0.165196	-1.59168	-0.353773	0.726434	0.914602	-4.94424	0.891808
ATP1A4	0.0877623	-1.81516	0.266588	0.791943	0.93888	-4.95142	1.06272
ATP1B1	0.948839	3.53993	2.13111	0.0429522	0.388148	-3.75816	1.93032
ATP1B2	0.426053	2.79582	1.16421	0.255176	0.677843	-4.93179	1.34355
ATP1B3	-0.39767	6.72619	-2.14813	0.0414434	0.38582	-3.82158	0.759083
ATP1B4	-0.303209	-5.95718	-0.521119	0.606806	0.860618	-4.86124	0.810447
ATP2A1	-0.0700022	1.28018	-0.226064	0.822964	0.949994	-5.23774	0.952637
ATP2A2	-0.0547294	7.70678	-0.303669	0.763858	0.926935	-5.71094	0.962775
ATP2A3	-0.168837	4.07117	-0.624819	0.537673	0.831095	-5.54879	0.889559
ATP2B1	0.0959244	5.39933	0.641001	0.527274	0.831095	-5.65694	1.06875
ATP2B2	0.20168	-1.08773	0.384926	0.703502	0.903552	-4.96466	1.15004
ATP2B3	0.22368	-3.15511	0.427398	0.672697	0.891065	-4.90415	1.16771
ATP2B4	0.0832577	8.12666	0.544781	0.590665	0.850874	-5.58731	1.05941
ATP2C1	0.0276187	6.3301	0.362362	0.720085	0.912	-5.77775	1.01933
ATP2C2	-0.245515	-2.56339	-0.593425	0.558154	0.837165	-4.86456	0.843514
ATP4A	-0.812388	-2.23457	-1.44909	0.159569	0.575279	-4.4273	0.569438
ATP4B	-0.956079	-4.96254	-1.32436	0.197198	0.621053	-4.50765	0.515456
ATP5S	-0.100639	3.62389	-0.631314	0.533486	0.831095	-5.47542	0.93262
ATP6AP1	0.0694038	6.75122	0.53223	0.599201	0.855867	-5.68398	1.04928
ATP6AP1L	0.11833	2.77259	0.518117	0.608869	0.861407	-5.38395	1.08548
ATP6AP2	-0.00144672	6.9367	-0.0143721	0.988646	0.997402	-5.80599	0.998998
ATP6V0A1	0.180426	5.79648	1.48096	0.150938	0.567763	-4.85332	1.13322
ATP6V0A2	-0.026407	4.96205	-0.160717	0.87359	0.962301	-5.81742	0.981863
ATP6V0A4	-0.367236	-5.8501	-0.570267	0.573516	0.843067	-4.84826	0.775266
ATP6V0B	-0.089927	5.86886	-0.706581	0.48627	0.82444	-5.61833	0.93957
ATP6V0C	-0.213673	7.02688	-1.27587	0.213568	0.637778	-5.05602	0.862339
ATP6V0D1	-0.250627	6.1367	-1.96501	0.0604607	0.427193	-4.14273	0.840531
ATP6V0D2	1.8937	-3.63002	1.69363	0.102588	0.503557	-4.25206	3.71588
ATP6V0E1	-0.182304	7.15887	-1.08292	0.289035	0.701648	-5.25131	0.881294
ATP6V0E2	-0.206309	4.09643	-1.01035	0.321871	0.72755	-5.26719	0.866752
ATP6V1A	0.0353255	5.73627	0.262673	0.794925	0.940358	-5.82255	1.02479
ATP6V1B1	-0.0880324	0.604518	-0.333331	0.741625	0.919409	-5.13077	0.940805
ATP6V1B2	-0.0575344	6.97558	-0.356377	0.724507	0.913717	-5.74362	0.960905
ATP6V1C1	0.0957392	6.15831	1.09638	0.283217	0.698853	-5.28764	1.06861
ATP6V1C2	-0.355199	1.50233	-1.52206	0.140371	0.554862	-4.43398	0.781762
ATP6V1D	-0.170594	4.98072	-1.21361	0.236081	0.65868	-5.15144	0.888477
ATP6V1E1	-0.141475	6.96117	-1.08529	0.288007	0.701648	-5.26054	0.906592
ATP6V1E2	-0.0670059	2.20821	-0.309444	0.759512	0.925477	-5.36027	0.954617
ATP6V1F	-0.110689	5.79475	-0.704599	0.487482	0.824914	-5.62041	0.926146
ATP6V1G1	-0.0962088	5.84041	-0.765021	0.451322	0.807563	-5.57854	0.935488
ATP6V1G2	0.484612	-0.419543	1.16067	0.25659	0.678987	-4.65218	1.39921
ATP6V1G3	-0.135907	-6.94733	-0.612903	0.545399	0.831095	-4.83385	0.910098
ATP6V1H	-0.0411093	5.39434	-0.3863	0.702498	0.902882	-5.78029	0.971907
ATP7A	0.211769	4.11382	1.6894	0.103405	0.504886	-4.48064	1.15811
ATP7B	0.0518546	3.72984	0.302011	0.765108	0.92725	-5.63263	1.0366
ATP8A1	0.301967	4.8957	1.31705	0.199604	0.624401	-5.02951	1.23282
ATP8A2	-0.642195	-0.469901	-1.79215	0.0850525	0.479945	-4.13183	0.640737
ATP8B1	0.053269	4.70735	0.207196	0.837512	0.955075	-5.78785	1.03761
ATP8B2	0.155331	5.97774	1.27548	0.213704	0.637778	-5.10105	1.11368
ATP8B3	0.227733	1.64278	0.893383	0.380054	0.766927	-5.00022	1.17099
ATP8B4	0.0404235	4.49684	0.147876	0.883611	0.965781	-5.77555	1.02842
ATP9A	0.0246499	7.09144	0.102025	0.919539	0.977693	-5.7911	1.01723
ATP9B	0.0067781	4.67884	0.0819543	0.935327	0.983875	-5.80222	1.00471
ATPAF1	-0.229318	5.63166	-1.49532	0.147175	0.563412	-4.83487	0.853038
ATPAF2	-0.296756	3.34711	-2.83167	0.00894305	0.321177	-2.52566	0.814081
ATR	-0.0187611	5.00946	-0.153655	0.879098	0.964299	-5.82177	0.98708
ATRAID	-0.0823561	6.3498	-0.714665	0.481345	0.822674	-5.59846	0.944514
ATRIP	0.082609	3.36307	0.842678	0.407288	0.780948	-5.29382	1.05893
ATRN	-0.00602078	5.99572	-0.0755521	0.940368	0.985779	-5.84917	0.995835
ATRNL1	0.415044	-2.45594	0.681791	0.501553	0.831002	-4.83601	1.33334
ATRX	0.179403	6.42769	1.95616	0.0615489	0.43056	-4.14866	1.13242
ATXN1	0.213407	5.25266	1.30103	0.20495	0.630051	-5.06658	1.15942
ATXN10	-0.168032	6.12305	-1.67936	0.105365	0.508085	-4.57748	0.890056
ATXN1L	-0.0654388	6.32162	-0.550892	0.58653	0.849411	-5.69681	0.955655
ATXN2	0.115978	5.87182	0.921528	0.365461	0.756356	-5.45575	1.08371
ATXN2L	0.150917	7.07878	1.39056	0.176447	0.595752	-4.91892	1.11027
ATXN3	0.24216	4.71741	1.8968	0.0693028	0.450702	-4.2245	1.18276
ATXN3L	-0.268003	-6.88129	-0.991437	0.330841	0.732932	-4.68657	0.830468
ATXN7	0.118412	5.45274	1.07642	0.291876	0.7053	-5.31258	1.08554
ATXN7L1	0.194212	3.9416	1.52518	0.139592	0.554862	-4.68216	1.1441
ATXN7L2	0.128929	2.73273	0.960418	0.345916	0.744775	-5.10114	1.09348
ATXN7L3	-0.0798821	5.8241	-0.870665	0.392106	0.773122	-5.49842	0.946135
ATXN7L3B	-0.0488096	5.86622	-0.773703	0.446261	0.805146	-5.57198	0.966734
AUH	0.137539	4.21336	1.24351	0.225056	0.648433	-5.04926	1.10003
AUNIP	0.0340496	-1.28139	0.134406	0.894143	0.968197	-4.99005	1.02388
AUP1	-0.07389	6.64286	-0.636219	0.530336	0.831095	-5.63329	0.950073
AURKA	0.0718128	0.898081	0.207036	0.837636	0.955075	-5.19064	1.05104
AURKAIP1	-0.390988	5.96455	-2.53312	0.0178534	0.333385	-3.14673	0.762607
AURKB	0.150723	-1.11081	0.217862	0.829281	0.952419	-4.99235	1.11013
AURKC	-0.0511406	0.967524	-0.231499	0.818785	0.948803	-5.19549	0.965173
AUTS2	0.101851	4.99343	0.634194	0.531635	0.831095	-5.64214	1.07315
AVEN	-0.33847	3.94041	-1.85272	0.0755981	0.462104	-4.22679	0.79088
AVIL	0.0130215	2.06229	0.07302	0.942363	0.986552	-5.37346	1.00907
AVL9	0.08518	5.4869	0.892296	0.380625	0.767029	-5.47945	1.06082
AVP	-0.750732	-1.93998	-1.44481	0.160759	0.577085	-4.4303	0.594302
AVPI1	-0.192028	5.00194	-0.94848	0.351839	0.748916	-5.41236	0.875374
AVPR1A	0.261872	3.02049	1.11461	0.275474	0.695334	-5.01152	1.19903
AVPR1B	-0.378674	-5.83204	-0.644259	0.525194	0.831095	-4.82602	0.769144
AVPR2	0.27017	3.64747	1.10022	0.281573	0.698567	-5.12023	1.20595
AWAT1	0.224588	-5.84043	0.406147	0.688042	0.896628	-4.88836	1.16844
AWAT2	-0.269637	-5.45134	-0.406776	0.687586	0.896532	-4.8901	0.829528
AXDND1	0.240896	-3.3148	0.45141	0.655532	0.883895	-4.89721	1.18173
AXIN1	-0.0383711	5.02492	-0.393194	0.697463	0.900937	-5.76067	0.973754
AXIN2	0.0456625	3.43998	0.16869	0.867379	0.96062	-5.61045	1.03216
AXL	0.104333	7.14818	0.656305	0.517541	0.831095	-5.59069	1.075
AZGP1	-0.440688	6.12105	-0.777508	0.444054	0.804752	-5.56344	0.736783
AZI2	-0.138263	4.88029	-0.694402	0.493745	0.82727	-5.59665	0.908612
AZIN1	-0.0705331	6.87953	-0.60265	0.552094	0.833647	-5.63892	0.952286
AZU1	-1.1826	-1.79916	-1.5587	0.131464	0.543426	-4.3475	0.440558
B2M	0.0426764	10.997	0.28583	0.777331	0.932736	-5.49957	1.03002
B3GALNT1	0.117294	2.77837	0.486739	0.630625	0.872624	-5.39852	1.0847
B3GALNT2	-0.000385315	3.14186	-0.00229076	0.99819	0.999133	-5.56841	0.999733
B3GALT1	-0.0229771	-0.651722	-0.0800347	0.936838	0.984231	-5.03952	0.9842
B3GALT2	0.391154	-1.27556	0.914491	0.369075	0.759215	-4.76164	1.31144
B3GALT4	0.015931	3.655	0.10694	0.915678	0.975859	-5.65633	1.0111
B3GALT5	-0.850735	-5.28421	-1.18959	0.245227	0.668005	-4.58632	0.554502
B3GALT6	-0.425353	3.97789	-2.73859	0.0111292	0.323712	-2.70906	0.744657
B3GAT1	-0.0498213	-1.07776	-0.115461	0.908989	0.973461	-5.00455	0.966056
B3GAT2	0.466689	1.73501	1.84922	0.0761182	0.462846	-4.06405	1.38193
B3GAT3	-0.233706	4.83355	-2.03554	0.0523746	0.409946	-4.0098	0.850448
B3GNT2	0.0580423	4.66706	0.444105	0.660734	0.885949	-5.71125	1.04105
B3GNT3	-0.43491	-2.56552	-0.741504	0.465201	0.816099	-4.8129	0.73974
B3GNT4	0.0986332	-2.38891	0.300044	0.76659	0.928093	-4.93596	1.07076
B3GNT5	-0.298121	3.11937	-0.918121	0.367208	0.757454	-5.19616	0.813311
B3GNT6	-0.0962621	-5.38977	-0.201353	0.842029	0.956079	-4.92211	0.935454
B3GNT7	0.396689	1.0741	1.32939	0.195557	0.619258	-4.59723	1.31648
B3GNT8	0.415539	1.13823	1.3315	0.194872	0.618589	-4.59956	1.3338
B3GNT9	-0.157136	2.4673	-0.633752	0.531919	0.831095	-5.27584	0.896804
B3GNTL1	-0.0121047	2.03575	-0.0845549	0.933279	0.983135	-5.36837	0.991645
B4GALNT1	0.246586	0.719751	0.732465	0.470602	0.818244	-4.99371	1.1864
B4GALNT2	-0.136123	-6.81525	-0.440294	0.663455	0.887128	-4.87903	0.909961
B4GALNT3	0.3994	-0.861487	0.90014	0.376517	0.764852	-4.78714	1.31896
B4GALNT4	0.0493492	-0.89244	0.114653	0.909623	0.97357	-5.01808	1.0348
B4GALT1	-0.139116	6.99975	-0.735162	0.468987	0.817455	-5.54918	0.908075
B4GALT2	-0.483569	5.57063	-2.61192	0.0149193	0.326192	-2.99729	0.715206
B4GALT3	-0.199153	5.0503	-1.40897	0.170992	0.589739	-4.92834	0.871062
B4GALT4	0.0182814	4.28421	0.227075	0.822186	0.949874	-5.73521	1.01275
B4GALT5	-0.313301	6.13254	-1.77861	0.0872987	0.483875	-4.4321	0.804798
B4GALT6	0.032277	1.90031	0.1176	0.907311	0.972591	-5.34387	1.02262
B4GALT7	-0.471978	4.66342	-2.67752	0.012827	0.325547	-2.85064	0.720975
B9D1	-0.160535	1.90125	-0.893847	0.379811	0.766829	-5.03229	0.894693
B9D2	-0.0758795	1.14123	-0.393199	0.697459	0.900937	-5.18028	0.948764
BAALC	-0.266458	3.0204	-1.1648	0.254942	0.677843	-4.96376	0.831358
BAAT	-1.5205	-4.26639	-2.28469	0.0309592	0.357846	-3.76634	0.348564
BABAM1	-0.19548	5.63833	-2.14828	0.0414303	0.38582	-3.84333	0.873282
BACE1	0.0753038	5.75282	0.938556	0.356815	0.752184	-5.44213	1.05358
BACE2	0.150068	5.7793	0.572222	0.572211	0.84291	-5.69987	1.10962
BACH1	0.105821	5.33878	0.602333	0.552302	0.833647	-5.67764	1.07611
BACH2	0.586135	2.48419	2.078	0.0479828	0.402054	-3.77707	1.50122
BAD	-0.168653	4.39852	-1.13383	0.267474	0.688408	-5.18548	0.889673
BAG1	-0.174516	5.97314	-1.17544	0.250739	0.674485	-5.21117	0.886065
BAG2	0.0326346	3.65007	0.105682	0.916666	0.976123	-5.65559	1.02288
BAG3	-0.525678	6.3069	-2.4963	0.0194003	0.334335	-3.21065	0.694632
BAG4	-0.26154	4.95019	-1.40619	0.171807	0.589949	-4.92612	0.834197
BAG5	-0.15128	6.12322	-0.757483	0.455743	0.810514	-5.57768	0.900451
BAG6	-0.0754364	7.73385	-0.807125	0.427102	0.794562	-5.4513	0.949055
BAHD1	0.0631727	4.84374	0.586013	0.563048	0.838702	-5.6586	1.04476
BAIAP2	0.169791	4.93954	0.86443	0.395457	0.774566	-5.47822	1.1249
BAIAP2L1	0.0079926	3.40105	0.0401223	0.96831	0.995543	-5.61554	1.00556
BAIAP2L2	-0.0583609	2.48804	-0.223198	0.82517	0.951252	-5.42736	0.960355
BAIAP3	0.411724	3.2538	1.22368	0.232323	0.65418	-4.93922	1.33027
BAK1	-0.351186	3.27139	-1.95032	0.0622761	0.432285	-4.01678	0.783939
BAMBI	-0.16186	1.52618	-0.575267	0.570182	0.841995	-5.16403	0.893872
BANF1	-0.387659	5.65811	-3.15844	0.00406964	0.313267	-1.89392	0.764369
BANF2	-0.136344	-6.75383	-0.417306	0.679967	0.893126	-4.884	0.909822
BANK1	-0.501785	3.50726	-1.69087	0.103121	0.504123	-4.41176	0.706232
BANP	0.135158	3.4841	0.694768	0.493519	0.82727	-5.41436	1.09821
BAP1	-0.109118	6.52744	-1.25435	0.221155	0.645587	-5.106	0.927155
BARD1	0.208078	2.55771	0.855137	0.400484	0.777875	-5.15336	1.15515
BARHL1	-0.499112	-5.32127	-0.924923	0.363726	0.756231	-4.71994	0.707542
BARHL2	-0.189122	-5.81179	-0.331038	0.743336	0.919967	-4.90242	0.877139
BARX1	-0.0634337	-4.16899	-0.102925	0.918832	0.977542	-4.93957	0.956984
BARX2	-0.572697	-4.95061	-0.956299	0.347952	0.746128	-4.70703	0.672359
BASP1	0.358714	5.09125	1.1365	0.266376	0.687157	-5.23911	1.28228
BATF	-0.469728	0.908307	-1.35562	0.187174	0.608199	-4.56318	0.722101
BATF2	0.0638734	0.696994	0.28269	0.77971	0.933956	-5.15266	1.04527
BATF3	-0.606366	1.72506	-2.30943	0.0293404	0.353564	-3.4386	0.656849
BAX	-0.198313	4.39165	-1.28041	0.211993	0.637109	-5.02817	0.871569
BAZ1A	-0.0858356	5.63609	-0.688947	0.497114	0.829727	-5.63086	0.942239
BAZ1B	0.0653198	6.63724	0.796884	0.432918	0.798072	-5.52656	1.04632
BAZ2A	0.209446	7.51302	1.8328	0.0786029	0.468707	-4.29434	1.15624
BAZ2B	0.283956	5.49609	2.08895	0.0469043	0.398931	-3.94283	1.21753
BBC3	0.189591	1.77025	0.636789	0.52997	0.831095	-5.16847	1.14044
BBIP1	0.214616	4.11268	1.54784	0.134054	0.547225	-4.67226	1.1604
BBOX1	-0.141651	-2.88036	-0.247539	0.806485	0.944662	-4.93867	0.906481
BBS1	0.179646	4.86533	1.89215	0.0699443	0.451643	-4.24063	1.13261
BBS10	0.19513	4.51868	1.16356	0.255438	0.67786	-5.16744	1.14483
BBS12	0.169097	2.173	0.935537	0.358338	0.753405	-5.03857	1.12435
BBS2	0.271487	5.27838	1.6943	0.102459	0.503356	-4.55536	1.20705
BBS4	0.134222	4.2354	1.39662	0.174635	0.593248	-4.87586	1.0975
BBS5	0.0333089	3.78711	0.18926	0.851396	0.956647	-5.66764	1.02336
BBS7	0.243037	4.01954	1.95536	0.0616475	0.430564	-4.07781	1.18348
BBS9	0.145886	3.88096	0.920835	0.365816	0.756449	-5.31435	1.10641
BBX	0.22985	5.66854	2.46122	0.0209887	0.334335	-3.28319	1.17271
BCAM	0.151442	7.19762	0.705026	0.487221	0.824914	-5.55682	1.11068
BCAN	-0.483974	-1.67739	-1.41006	0.170672	0.589214	-4.45493	0.715005
BCAP29	-0.168961	6.10009	-1.54072	0.135775	0.549708	-4.7698	0.889483
BCAP31	-0.277079	8.43497	-1.15	0.260878	0.682132	-5.10739	0.82526
BCAR1	-0.365157	5.88674	-1.86499	0.0737977	0.45951	-4.30507	0.776385
BCAR3	-0.219457	5.66263	-1.27143	0.215115	0.639059	-5.10846	0.858889
BCAS1	0.415083	-0.677945	0.55619	0.582957	0.847597	-4.94544	1.33338
BCAS2	-0.095267	4.66401	-0.723014	0.476289	0.8208	-5.5592	0.936099
BCAS3	0.0623991	4.7369	0.425656	0.67395	0.891327	-5.72546	1.0442
BCAS4	-0.158364	0.0743633	-0.264302	0.793684	0.939972	-5.08731	0.896041
BCAT1	0.296169	4.94472	1.02479	0.315142	0.722801	-5.33985	1.22788
BCAT2	-0.0329711	5.15625	-0.126167	0.900595	0.970731	-5.83414	0.977405
BCCIP	-0.398096	5.03722	-2.77493	0.0102218	0.323712	-2.67126	0.758859
BCDIN3D	0.038666	0.904934	0.228834	0.820834	0.949529	-5.18802	1.02716
BCHE	-0.0769365	0.114339	-0.148737	0.882938	0.965507	-5.10742	0.948069
BCKDHA	-0.0820388	5.50846	-0.564654	0.577271	0.843801	-5.70258	0.944722
BCKDHB	0.0168056	4.92068	0.0855563	0.932491	0.982813	-5.82309	1.01172
BCKDK	-0.152103	5.59611	-1.23339	0.228742	0.652328	-5.15076	0.899938
BCL10	0.123512	3.74994	0.844409	0.406339	0.78042	-5.35485	1.08938
BCL11A	0.384787	-1.58723	0.906054	0.373438	0.762204	-4.75572	1.30567
BCL11B	0.391923	0.817372	1.342	0.191491	0.613496	-4.57027	1.31214
BCL2	-0.0340956	6.02392	-0.143939	0.886686	0.966389	-5.84133	0.976644
BCL2A1	-0.223009	1.1241	-0.372113	0.712901	0.908818	-5.1841	0.856777
BCL2L1	-0.0792955	7.23965	-0.409415	0.685674	0.895186	-5.70734	0.94652
BCL2L10	-0.473036	-2.59297	-1.18767	0.245972	0.668654	-4.59459	0.720447
BCL2L11	0.459839	4.77069	3.15692	0.00408477	0.313267	-1.8905	1.37539
BCL2L12	-0.111359	2.70163	-0.835775	0.411089	0.782987	-5.18967	0.925716
BCL2L13	-0.0233906	6.3299	-0.113011	0.910912	0.973867	-5.83408	0.983918
BCL2L14	0.235311	-4.11348	0.525743	0.603635	0.858316	-4.87145	1.17716
BCL2L15	0.220989	-2.67792	0.383952	0.704215	0.903986	-4.91762	1.16553
BCL2L2	-0.0286241	6.57964	-0.263728	0.794121	0.940071	-5.79451	0.980355
BCL2L2-PABPN1	0.454691	-2.12813	1.72359	0.0969579	0.496424	-4.22234	1.37049
BCL3	-0.608877	5.23607	-2.20967	0.0363761	0.371854	-3.73139	0.655707
BCL6	0.127038	8.73182	0.450304	0.656318	0.884044	-5.58837	1.09205
BCL6B	-0.557059	4.95793	-1.8643	0.073899	0.459827	-4.28873	0.679686
BCL7A	0.0334753	3.2137	0.172213	0.864638	0.960323	-5.56848	1.02347
BCL7B	-0.198135	5.99447	-1.37442	0.181339	0.602707	-4.98427	0.871676
BCL7C	-0.122291	4.39545	-1.1835	0.24759	0.67047	-5.13396	0.918728
BCL9	0.385885	4.09316	3.18942	0.00377162	0.313267	-1.82008	1.30666
BCL9L	-0.0263943	6.20385	-0.154485	0.878451	0.964299	-5.834	0.981871
BCLAF1	0.127997	7.37204	1.12645	0.270523	0.691069	-5.19552	1.09278
BCO2	0.534585	0.967065	1.88058	0.0715647	0.454721	-4.01593	1.44853
BCOR	-0.0333013	4.95578	-0.188431	0.852039	0.956647	-5.81237	0.977182
BCORL1	0.176364	4.45598	1.22083	0.233381	0.655393	-5.10047	1.13003
BCR	-0.183869	6.71355	-0.900849	0.376147	0.764577	-5.4411	0.880339
BCS1L	0.0704527	4.64043	0.598412	0.554874	0.835185	-5.63342	1.05005
BDH1	-0.438923	3.67792	-1.15541	0.258697	0.680518	-5.0707	0.737685
BDH2	0.236201	4.39913	1.49039	0.148459	0.564822	-4.77635	1.17789
BDKRB1	-0.440261	-1.15876	-0.890763	0.381432	0.767358	-4.77806	0.737001
BDKRB2	-0.832936	3.47123	-2.51506	0.0185973	0.334249	-3.10339	0.561385
BDNF	0.713731	-2.07301	1.41026	0.170615	0.589214	-4.45417	1.64004
BDP1	0.18656	5.5351	1.92507	0.0655098	0.439788	-4.21099	1.13805
BEAN1	0.521907	-0.233645	1.45243	0.158648	0.574184	-4.43605	1.43585
BECN1	-0.0796937	5.46775	-0.698593	0.491166	0.825754	-5.6224	0.946259
BEGAIN	0.325298	0.350867	1.19081	0.244758	0.667281	-4.66881	1.25292
BEND2	0.0153774	-5.57683	0.025875	0.97956	0.997402	-4.93116	1.01072
BEND3	-0.469208	1.30362	-2.16201	0.0402474	0.384273	-3.65777	0.722361
BEND4	0.844317	-2.23781	0.981025	0.33585	0.737644	-4.70919	1.79541
BEND5	0.297745	2.11334	1.80135	0.0835535	0.476358	-4.14074	1.22922
BEND6	0.346635	0.0513829	0.6455	0.524403	0.831095	-4.9708	1.27159
BEND7	0.211664	4.53352	1.38269	0.178819	0.599296	-4.92288	1.15802
BEST1	-0.225898	4.36285	-1.48036	0.151099	0.567794	-4.78557	0.855063
BEST2	-0.0432702	-3.37764	-0.106216	0.916247	0.976123	-4.94719	0.970453
BEST3	1.20817	-4.96406	2.02602	0.0534064	0.41151	-3.99629	2.31044
BEST4	0.18969	-1.62217	0.574739	0.570533	0.841997	-4.88676	1.14052
BET1	-0.0237253	4.3344	-0.210531	0.834936	0.954178	-5.74523	0.983689
BET1L	0.0331493	5.42112	0.312307	0.757362	0.924476	-5.80559	1.02324
BEX1	-0.573117	-1.33808	-1.30086	0.205005	0.630051	-4.53235	0.672163
BEX2	0.157933	-0.894619	0.350807	0.728632	0.915217	-4.98524	1.11569
BEX4	0.0804076	4.20849	0.548168	0.588371	0.849885	-5.60937	1.05732
BEX5	0.258752	-0.22199	0.941324	0.355422	0.751239	-4.80122	1.19644
BFAR	-0.0289805	5.73202	-0.25711	0.799169	0.941874	-5.82395	0.980113
BFSP1	-0.441419	0.430446	-1.38407	0.178401	0.599144	-4.5143	0.73641
BFSP2	-0.25773	-6.42826	-0.651751	0.520427	0.831095	-4.82215	0.836403
BGLAP	-0.13383	0.699361	-0.729164	0.472584	0.819588	-4.99333	0.911408
BGN	0.0318134	6.81101	0.0917878	0.927588	0.980866	-5.80996	1.0223
BHLHA15	0.276585	-5.79871	0.497861	0.622873	0.868927	-4.86775	1.21132
BHLHA9	0.0679172	-5.1161	0.121779	0.904034	0.972079	-4.93049	1.0482
BHLHB9	0.486716	2.13674	2.11544	0.0443849	0.391443	-3.71401	1.40125
BHLHE22	0.321226	0.914761	0.87755	0.388428	0.771444	-4.93105	1.24939
BHLHE23	0.0559546	-5.93527	0.106762	0.915818	0.975859	-4.92672	1.03955
BHLHE40	-0.411126	7.51386	-0.904736	0.374123	0.762581	-5.38946	0.752036
BHLHE41	0.0224675	4.68894	0.0690984	0.945453	0.987875	-5.80413	1.0157
BHMT	0.107983	0.313904	0.235908	0.8154	0.947411	-5.11748	1.07772
BHMT2	0.0376798	5.20774	0.151565	0.88073	0.964716	-5.83338	1.02646
BICC1	0.463513	5.05597	1.98749	0.0577715	0.420943	-4.0986	1.3789
BICD1	0.230289	3.63954	1.19266	0.244044	0.666105	-5.02738	1.17307
BICD2	-0.031769	5.76345	-0.364329	0.718634	0.911514	-5.7921	0.97822
BID	-0.203147	4.50831	-1.53411	0.137387	0.551548	-4.72977	0.868654
BIK	-0.699813	-3.87792	-1.13693	0.266198	0.686987	-4.61935	0.615652
BIN1	-0.354909	6.34342	-1.65294	0.110674	0.51892	-4.60832	0.781919
BIN2	0.16826	3.19637	0.625752	0.53707	0.831095	-5.40502	1.1237
BIN3	-0.464728	3.89792	-2.77954	0.0101116	0.323712	-2.6288	0.724608
BIRC2	0.0686202	5.7908	0.816182	0.421999	0.790438	-5.54129	1.04871
BIRC3	0.292043	3.86663	1.0751	0.292453	0.705553	-5.17588	1.22437
BIRC5	-0.289896	-2.01942	-0.340593	0.736216	0.918701	-4.93451	0.817961
BIRC6	0.153897	6.66785	1.85524	0.0752254	0.461459	-4.2979	1.11257
BIRC7	1.47949	-1.72921	1.96008	0.0610647	0.429142	-4.01927	2.78851
BIRC8	-0.195963	-6.3883	-0.586642	0.562632	0.838518	-4.84213	0.87299
BIVM	0.052277	4.62534	0.344084	0.733621	0.917341	-5.74417	1.0369
BLCAP	-0.39668	6.90882	-2.12674	0.0433473	0.388785	-3.85108	0.759604
BLID	-0.330608	-6.39293	-0.73762	0.467518	0.816519	-4.7929	0.795201
BLK	-0.319124	-1.42022	-0.701394	0.489446	0.825063	-4.85026	0.801557
BLM	0.509734	0.894069	1.73862	0.0942324	0.492139	-4.17683	1.42379
BLMH	0.0197463	5.29835	0.249601	0.804907	0.944279	-5.8184	1.01378
BLNK	0.625745	1.10479	1.40073	0.173415	0.591189	-4.53265	1.54301
BLOC1S1	-0.167124	5.52341	-1.15087	0.260526	0.681873	-5.23852	0.890616
BLOC1S2	-0.131822	4.51625	-0.827617	0.41561	0.784898	-5.46956	0.912678
BLOC1S3	0.031545	3.72176	0.32134	0.750587	0.922365	-5.62575	1.02211
BLOC1S4	-0.2469	3.2312	-1.92505	0.0655116	0.439788	-4.05072	0.842706
BLOC1S5	0.135083	3.79443	0.99655	0.3284	0.731109	-5.23725	1.09816
BLOC1S6	-0.0625525	6.10075	-0.524227	0.604674	0.859222	-5.71858	0.957568
BLVRA	-0.110512	5.20711	-1.00747	0.323228	0.728036	-5.37038	0.926259
BLVRB	-0.195657	5.87186	-1.24086	0.226017	0.649924	-5.14181	0.873175
BLZF1	-0.0780305	4.21664	-0.674321	0.50621	0.831095	-5.53943	0.94735
BMF	0.781503	3.10691	2.29477	0.03029	0.355553	-3.4652	1.71892
BMI1	0.0539291	5.70215	0.452048	0.655078	0.883609	-5.75833	1.03809
BMP1	-0.326518	6.93174	-1.75091	0.0920531	0.489421	-4.44287	0.797459
BMP10	-0.16615	-5.54236	-0.245807	0.807811	0.945123	-4.91617	0.891218
BMP15	0.0573083	-6.85058	0.19207	0.849218	0.956091	-4.91837	1.04052
BMP2	0.0324675	4.07497	0.118989	0.906222	0.972467	-5.72313	1.02276
BMP2K	0.135949	3.34221	0.834117	0.412005	0.783461	-5.29664	1.09882
BMP3	1.58922	0.437569	1.71263	0.0989863	0.498088	-4.20069	3.00888
BMP4	0.0965173	3.52263	0.453551	0.65401	0.883281	-5.54504	1.06919
BMP5	0.231851	1.52204	0.624294	0.538012	0.831095	-5.1409	1.17434
BMP6	0.0606062	5.23099	0.343214	0.734268	0.917709	-5.78933	1.0429
BMP7	0.321867	-0.629226	0.718249	0.479171	0.821051	-4.88691	1.24995
BMP8A	-0.306772	-1.28758	-1.09826	0.282414	0.698809	-4.66128	0.808449
BMP8B	0.241018	1.33938	0.893508	0.379989	0.766927	-4.96508	1.18183
BMPER	0.253911	2.46717	0.600728	0.553354	0.834332	-5.29284	1.19244
BMPR1A	0.109115	5.38379	0.94296	0.354601	0.750767	-5.43425	1.07857
BMPR1B	0.293604	-0.379308	0.60626	0.549732	0.832859	-4.95035	1.2257
BMPR2	-0.0173715	6.98124	-0.154856	0.878161	0.964259	-5.79186	0.988031
BMS1	-0.242744	5.66553	-2.51782	0.0184815	0.334249	-3.17704	0.845136
BMX	0.394124	3.14026	1.12702	0.270289	0.690996	-5.01795	1.31415
BNC1	0.369189	-1.56119	0.767529	0.449857	0.807053	-4.81858	1.29163
BNC2	0.401128	4.66836	2.73444	0.0112377	0.323712	-2.7405	1.32054
BNIP1	-0.405594	2.7804	-3.01404	0.00578327	0.313267	-2.21515	0.754926
BNIP2	0.0127844	6.72992	0.143304	0.887183	0.966389	-5.80917	1.0089
BNIP3	-0.0640786	5.93556	-0.298991	0.767384	0.928151	-5.81057	0.956556
BNIP3L	-0.289086	8.31352	-1.22608	0.231434	0.653821	-5.03581	0.81842
BNIPL	0.124303	-1.64659	0.350366	0.728958	0.915306	-4.94276	1.08998
BOC	0.534944	5.37702	2.48567	0.0198694	0.334335	-3.23518	1.44889
BOD1	-0.129102	5.44731	-1.07349	0.293163	0.705628	-5.31534	0.9144
BOD1L1	0.247626	6.31764	2.26894	0.0320317	0.361569	-3.62457	1.18725
BOD1L2	-0.566365	-5.20692	-0.77601	0.444922	0.804862	-4.7824	0.675316
BOK	-0.433802	7.07553	-1.44838	0.159766	0.575647	-4.84771	0.740308
BOLA1	-0.151957	3.28613	-1.03534	0.310285	0.719634	-5.12469	0.900029
BOLA2	-0.943271	-1.71977	-2.76378	0.0104924	0.323712	-3.2446	0.520053
BOLA2B	0.00867967	-2.11244	0.0178602	0.98589	0.997402	-4.9642	1.00603
BOLA3	-0.589044	2.95877	-3.23516	0.00336967	0.31302	-1.78683	0.664783
BOLL	-0.37382	-5.74251	-0.614191	0.544561	0.831095	-4.83573	0.771736
BOP1	-0.642799	1.13129	-2.30056	0.0299113	0.354704	-3.4796	0.640469
BORA	0.0361619	1.51901	0.156838	0.876615	0.96395	-5.28167	1.02538
BPGM	-0.0862405	3.83747	-0.762704	0.452678	0.808252	-5.42716	0.941974
BPHL	-0.0252764	3.63533	-0.127948	0.8992	0.970314	-5.65066	0.982632
BPI	-0.00519333	-2.1185	-0.00728337	0.994246	0.997892	-4.96417	0.996407
BPIFA1	-0.397402	-6.41901	-0.917853	0.367346	0.757456	-4.72047	0.759224
BPIFA2	-0.656158	-6.55571	-1.75879	0.090679	0.488355	-4.21241	0.634566
BPIFA3	-0.462624	-6.32689	-1.04488	0.305939	0.715396	-4.66103	0.725665
BPIFB1	0.035228	-5.26336	0.0481927	0.96194	0.99365	-4.93266	1.02472
BPIFB2	-1.05985	-3.32303	-1.22502	0.231829	0.653821	-4.57053	0.479683
BPIFB3	0.188948	-6.52038	0.52303	0.605495	0.859554	-4.85945	1.13993
BPIFB4	1.11916	-4.54799	1.2855	0.210235	0.634805	-4.53178	2.17221
BPIFB6	-0.339737	-6.65246	-1.18949	0.245266	0.668005	-4.58496	0.790185
BPIFC	-0.433361	-5.1101	-0.651531	0.520566	0.831095	-4.82701	0.740535
BPNT1	-0.118042	3.96584	-0.999167	0.327155	0.730424	-5.25952	0.921438
BPTF	0.239617	6.39037	2.14294	0.0418977	0.386233	-3.8413	1.18068
BPY2	-0.135907	-6.94733	-0.612903	0.545399	0.831095	-4.83385	0.910098
BPY2B	-0.135907	-6.94733	-0.612903	0.545399	0.831095	-4.83385	0.910098
BPY2C	-0.135907	-6.94733	-0.612903	0.545399	0.831095	-4.83385	0.910098
BRAF	0.170815	5.40807	1.6332	0.114786	0.525245	-4.64546	1.12569
BRAP	-0.0434301	4.69566	-0.554787	0.583902	0.848116	-5.6622	0.970345
BRAT1	-0.0797836	5.77426	-0.797069	0.432813	0.798072	-5.55572	0.9462
BRCA1	0.288229	2.57119	1.49363	0.147614	0.563764	-4.55476	1.22114
BRCA2	0.213242	1.03751	0.524958	0.604173	0.858767	-5.12257	1.15929
BRCC3	0.0147871	3.98424	0.132045	0.895991	0.968897	-5.70786	1.0103
BRD1	0.0965359	5.74639	1.13522	0.2669	0.68804	-5.25588	1.0692
BRD2	-0.0126849	7.95689	-0.165188	0.870106	0.96087	-5.72382	0.991246
BRD3	0.115436	5.12796	1.0995	0.281879	0.698567	-5.27838	1.0833
BRD4	-0.0176392	6.75941	-0.129998	0.897594	0.969541	-5.8091	0.987848
BRD7	-0.0221034	5.70081	-0.393497	0.697242	0.900937	-5.78181	0.984796
BRD8	0.0464663	5.74868	0.394336	0.69663	0.900821	-5.78136	1.03273
BRD9	-0.0232215	5.44683	-0.318508	0.752708	0.92283	-5.80434	0.984033
BRDT	0.242538	-4.81645	0.393806	0.697017	0.900847	-4.89688	1.18307
BRF1	-0.0979531	5.43492	-0.95884	0.346695	0.745385	-5.42165	0.934358
BRF2	-0.249771	2.76486	-2.27109	0.031883	0.360828	-3.49133	0.84103
BRI3	-0.0816544	6.70971	-0.622506	0.539168	0.831095	-5.63761	0.944973
BRI3BP	-0.0786635	3.07078	-0.433217	0.668521	0.889611	-5.47226	0.946934
BRICD5	0.246531	2.67015	1.45748	0.157261	0.572725	-4.60733	1.18635
BRINP1	0.929803	-3.81917	1.16807	0.253646	0.676834	-4.60214	1.90502
BRINP2	0.468221	-1.72631	0.767789	0.449705	0.807053	-4.81376	1.3834
BRINP3	0.667262	-5.2884	0.715523	0.480824	0.822114	-4.80432	1.58806
BRIP1	0.11522	0.446341	0.250681	0.804081	0.944248	-5.1297	1.08314
BRIX1	-0.32927	4.15561	-1.95909	0.0611869	0.429356	-4.08407	0.795939
BRK1	-0.170723	7.15465	-1.75753	0.0908987	0.488387	-4.42277	0.888397
BRMS1	-0.23688	4.93127	-2.16867	0.0396849	0.383544	-3.7914	0.848579
BRMS1L	-0.207827	3.32996	-1.41798	0.168371	0.586335	-4.73605	0.865841
BROX	0.101473	5.24449	0.888851	0.382439	0.768063	-5.47524	1.07287
BRPF1	-0.120856	4.90248	-1.55873	0.131456	0.543426	-4.72677	0.919642
BRPF3	0.00122458	5.52999	0.00596654	0.995286	0.998148	-5.85422	1.00085
BRS3	0.0282801	-6.01179	0.0512694	0.959513	0.992692	-4.92864	1.0198
BRSK1	-0.0144096	0.446401	-0.0398551	0.968521	0.995543	-5.15104	0.990062
BRSK2	-0.252016	0.642157	-0.778629	0.443405	0.804385	-4.96175	0.839722
BRWD1	0.301405	6.36497	2.60766	0.0150657	0.326288	-2.99843	1.23234
BRWD3	0.316139	4.80494	1.87717	0.072048	0.455503	-4.26042	1.24499
BSCL2	-0.21951	5.50289	-1.89192	0.069976	0.451643	-4.26288	0.858857
BSDC1	0.0584147	6.56693	0.589739	0.560585	0.838518	-5.66405	1.04132
BSG	-0.297637	8.93287	-1.62486	0.116561	0.527335	-4.52162	0.813584
BSN	-0.0181157	0.838928	-0.0813581	0.935796	0.984066	-5.19643	0.987522
BSND	-0.763646	-6.05529	-1.42708	0.165757	0.582953	-4.44286	0.589006
BSPH1	-0.463627	-6.45897	-1.24947	0.222907	0.647085	-4.55114	0.725161
BSPRY	0.491156	-1.39586	1.1124	0.276402	0.696331	-4.65025	1.40557
BST1	0.0484407	3.75424	0.266223	0.79222	0.939088	-5.64604	1.03415
BST2	0.0246291	6.5797	0.149637	0.882235	0.9652	-5.81689	1.01722
BSX	-0.268003	-6.88129	-1.0325	0.311589	0.720051	-4.66682	0.830468
BTAF1	0.302721	6.77636	1.71463	0.0986137	0.498055	-4.50267	1.23347
BTBD1	-0.177432	6.06114	-1.58896	0.124463	0.535685	-4.70552	0.884275
BTBD10	-0.0340792	4.52901	-0.365305	0.717914	0.911336	-5.72676	0.976655
BTBD11	-0.00472897	-0.50405	-0.0142594	0.988735	0.997402	-5.05426	0.996727
BTBD16	0.287313	-3.23556	0.515639	0.610574	0.862411	-4.88168	1.22037
BTBD17	-0.953207	-5.46239	-1.69115	0.103067	0.504123	-4.26039	0.516483
BTBD18	0.28161	-2.69095	0.690485	0.496162	0.829203	-4.83096	1.21555
BTBD19	0.237474	1.86617	1.35508	0.187343	0.608379	-4.63439	1.17893
BTBD2	-0.00629587	6.45931	-0.053696	0.957598	0.992059	-5.8326	0.995646
BTBD3	0.0319046	4.69537	0.267515	0.791237	0.938712	-5.77316	1.02236
BTBD6	-0.336522	6.94179	-1.51429	0.14232	0.557221	-4.77026	0.791948
BTBD7	0.0670215	5.31544	0.72566	0.474693	0.819826	-5.60014	1.04755
BTBD8	1.02207	-0.568403	2.50479	0.0190329	0.334249	-3.38984	2.03083
BTBD9	-0.0403261	3.97711	-0.447093	0.658604	0.885061	-5.62242	0.972435
BTC	-0.045796	0.78882	-0.18569	0.854166	0.956753	-5.18009	0.968755
BTD	-0.144178	4.92989	-0.812008	0.424346	0.792482	-5.5181	0.904895
BTF3	-0.0659173	8.54744	-0.512334	0.612852	0.863304	-5.57393	0.955338
BTF3L4	-0.203443	5.50237	-1.68443	0.104371	0.506668	-4.57444	0.868476
BTG1	0.0999351	8.20771	0.555294	0.58356	0.847907	-5.57643	1.07173
BTG2	0.10114	7.52118	0.433013	0.668667	0.889619	-5.67918	1.07262
BTG3	-0.189388	4.50344	-1.16016	0.256792	0.679043	-5.16942	0.876978
BTG4	-0.634703	-6.50478	-1.58921	0.124406	0.535685	-4.33455	0.644073
BTK	0.437814	3.3301	1.29037	0.208566	0.632421	-4.87986	1.35455
BTLA	0.128997	-1.27576	0.32361	0.748887	0.92192	-4.96566	1.09353
BTN1A1	-0.828554	-4.71336	-1.44348	0.161128	0.5776	-4.4318	0.563093
BTN2A1	0.0550703	5.53406	0.345348	0.732681	0.917046	-5.79745	1.03891
BTN2A2	0.340539	3.49387	1.51541	0.142038	0.556833	-4.63943	1.26623
BTN3A1	0.206881	4.84294	0.70271	0.488639	0.824914	-5.58838	1.15419
BTN3A2	0.197556	4.75159	0.90655	0.373181	0.762157	-5.42943	1.14675
BTN3A3	0.183037	4.38179	0.922589	0.364919	0.756289	-5.37892	1.13527
BTNL2	0.143172	-5.36747	0.264542	0.793501	0.939972	-4.91476	1.10433
BTNL3	0.858967	-2.33748	1.81418	0.0815031	0.474034	-4.15104	1.81374
BTNL8	-0.106978	-0.823971	-0.280807	0.781138	0.934546	-5.0037	0.928531
BTNL9	0.00904369	9.62844	0.0327599	0.974123	0.997402	-5.61938	1.00629
BTRC	0.0421886	4.4042	0.486527	0.630773	0.872761	-5.66404	1.02967
BUB1	0.0678686	-0.448141	0.117304	0.907543	0.972767	-5.05503	1.04817
BUB1B	-0.504152	-0.515232	-0.645227	0.524577	0.831095	-4.92497	0.705075
BUB3	0.0531592	6.01217	0.690207	0.496334	0.829339	-5.62627	1.03753
BUD13	0.0318954	4.18576	0.374905	0.710849	0.907664	-5.68037	1.02235
BUD31	-0.161559	4.44204	-1.67668	0.105894	0.508807	-4.5299	0.894059
BVES	0.408483	2.55712	1.37456	0.181298	0.602679	-4.68644	1.32729
BX004987.1	0.128786	-6.81525	0.494633	0.625119	0.870003	-4.86637	1.09337
BYSL	-0.863101	3.51454	-3.29142	0.00293174	0.310503	-1.63178	0.549769
BZW1	-0.379653	6.89238	-2.21638	0.0358589	0.370326	-3.69868	0.768622
BZW2	-0.471468	5.28873	-2.72158	0.0115795	0.324111	-2.7811	0.72123
C10orf105	-0.0456684	-2.44254	-0.125906	0.900799	0.970731	-4.95521	0.968841
C10orf113	0.320093	-6.52501	0.764942	0.451368	0.807563	-4.7827	1.24841
C10orf120	0.451551	-6.52038	1.23443	0.228362	0.651746	-4.55974	1.36751
C10orf53	-0.331038	-6.45434	-0.806926	0.427215	0.794562	-4.7667	0.794964
C10orf55	-0.149458	-2.02245	-0.320635	0.751115	0.922573	-4.93802	0.901589
C10orf62	-0.613762	-4.81057	-0.864125	0.395621	0.774566	-4.74872	0.65349
C10orf67	0.0320222	-6.1485	0.0606214	0.952136	0.990571	-4.92792	1.02244
C10orf71	0.855081	-3.5411	1.31955	0.198778	0.623372	-4.51224	1.80886
C10orf82	-0.278944	-3.61812	-0.596179	0.556342	0.835931	-4.85525	0.824194
C10orf88	0.0581586	3.21432	0.603717	0.551395	0.83322	-5.42008	1.04114
C10orf90	-0.733854	-0.279168	-1.27222	0.214841	0.638763	-4.57789	0.601295
C10orf95	0.471286	-4.54869	0.838466	0.409605	0.782262	-4.7609	1.38634
C10orf99	-0.100366	-5.74063	-0.165901	0.869551	0.96087	-4.92349	0.932796
C11orf1	-0.128212	2.6504	-0.862094	0.396717	0.774805	-5.16286	0.914965
C11orf16	0.689058	-4.92955	1.33432	0.19396	0.616989	-4.50154	1.61223
C11orf21	0.398227	1.26481	0.874444	0.390085	0.772183	-4.96929	1.31789
C11orf24	-0.515861	5.17894	-2.82949	0.00898932	0.321177	-2.56554	0.699376
C11orf40	-0.329572	-6.7185	-0.936207	0.357999	0.753405	-4.71208	0.795773
C11orf42	0.320888	-3.41834	0.638761	0.528707	0.831095	-4.84331	1.2491
C11orf45	1.06869	0.631805	1.83534	0.0782132	0.468109	-4.06916	2.09752
C11orf49	-0.0903337	3.54023	-0.866119	0.394548	0.774138	-5.30519	0.939305
C11orf52	-0.071935	1.435	-0.277195	0.783878	0.935367	-5.24937	0.951361
C11orf53	0.863347	-0.933693	1.31809	0.19926	0.623908	-4.52685	1.81925
C11orf54	0.167406	4.88168	1.31688	0.199659	0.624468	-5.02877	1.12304
C11orf58	-0.0933953	6.96461	-0.906399	0.373259	0.762178	-5.42206	0.937314
C11orf65	0.867034	-1.20809	2.15979	0.0404371	0.384288	-3.81168	1.82391
C11orf68	-0.058858	5.32149	-0.445478	0.659755	0.88561	-5.75461	0.960024
C11orf71	0.097796	-6.69827	0.293879	0.771243	0.929331	-4.90604	1.07014
C11orf74	-0.124288	2.9171	-1.40454	0.172292	0.59033	-4.69745	0.917457
C11orf80	0.179295	2.22493	0.847725	0.404523	0.779709	-5.10857	1.13233
C11orf86	-0.552653	-2.76433	-0.771676	0.44744	0.806237	-4.79967	0.681765
C11orf87	0.293927	-4.20014	0.385702	0.702935	0.90316	-4.90352	1.22597
C11orf88	-0.0874007	-3.99013	-0.154925	0.878107	0.964259	-4.9378	0.941217
C11orf91	-0.25086	-2.92647	-0.728388	0.473051	0.819606	-4.81534	0.840395
C11orf94	-0.475807	-5.36202	-0.834712	0.411677	0.78329	-4.75848	0.719065
C11orf95	0.0740178	5.3658	0.569352	0.574127	0.843276	-5.69671	1.05264
C11orf96	-0.629656	6.67968	-1.47652	0.152119	0.568372	-4.832	0.646331
C12orf10	-0.0502435	4.76672	-0.546953	0.589193	0.850275	-5.6728	0.965773
C12orf29	-0.0419165	3.40011	-0.323903	0.748669	0.92192	-5.56876	0.971364
C12orf4	-0.184378	4.02883	-1.17952	0.24914	0.672261	-5.09444	0.880028
C12orf40	0.969001	-2.89777	1.7435	0.0933626	0.491311	-4.21056	1.95748
C12orf42	0.197918	-5.40453	0.347545	0.731051	0.916254	-4.90166	1.14704
C12orf43	-0.143355	3.97098	-1.17507	0.250886	0.674683	-5.09148	0.905411
C12orf45	-0.499631	2.54403	-3.02731	0.00560079	0.313267	-2.21363	0.707288
C12orf49	-0.0963259	3.65548	-0.703033	0.488441	0.824914	-5.43764	0.935412
C12orf50	-0.410942	-5.54561	-0.744378	0.463492	0.814985	-4.79277	0.752132
C12orf54	0.410775	-2.67553	1.12086	0.272852	0.692634	-4.63258	1.3294
C12orf56	0.761186	-5.73023	1.27702	0.213168	0.637588	-4.53549	1.69488
C12orf57	-0.0917915	4.6879	-0.545656	0.590071	0.850629	-5.66617	0.938357
C12orf60	0.385924	0.10533	1.47593	0.152275	0.568372	-4.42293	1.3067
C12orf65	0.165404	3.58349	1.10393	0.27999	0.69741	-5.10719	1.12148
C12orf66	-0.0959924	2.67586	-0.683893	0.500246	0.830868	-5.28254	0.935628
C12orf71	0.0259485	-2.87987	0.0736508	0.941866	0.986552	-4.95354	1.01815
C12orf73	0.287273	2.43475	2.09421	0.0463942	0.398049	-3.7516	1.22033
C12orf74	0.259941	-6.55571	0.733927	0.469726	0.817648	-4.79403	1.19743
C12orf75	0.344412	2.22337	0.890681	0.381475	0.767358	-5.07834	1.26963
C12orf76	0.2961	3.13285	2.15662	0.0407079	0.384932	-3.68913	1.22782
C14orf119	-0.284031	5.20614	-1.92884	0.0650174	0.438686	-4.19807	0.821293
C14orf132	0.585844	3.96844	2.59693	0.0154405	0.327267	-2.97473	1.50092
C14orf177	-0.461612	-6.78454	-1.65905	0.109428	0.516648	-4.2854	0.726175
C14orf178	0.314858	-5.74526	0.522011	0.606194	0.860133	-4.86181	1.24389
C14orf180	-0.426247	5.67308	-1.2013	0.240736	0.662677	-5.18627	0.744195
C14orf28	0.361463	3.22005	2.07362	0.0484201	0.403501	-3.82498	1.28473
C14orf39	-0.206475	-0.423569	-0.371318	0.713486	0.909189	-5.01829	0.866652
C14orf93	0.298266	3.27408	2.41526	0.0232519	0.339052	-3.27003	1.22967
C15orf39	-0.262592	5.37592	-1.10636	0.278959	0.69741	-5.28103	0.833589
C15orf40	0.0662831	3.78435	0.556142	0.582989	0.847597	-5.54211	1.04702
C15orf41	0.251508	2.46833	1.18853	0.245637	0.668421	-4.86406	1.19045
C15orf48	-0.99725	-2.41936	-1.63395	0.114628	0.525245	-4.29323	0.500954
C15orf53	-0.330195	-6.46359	-0.757201	0.45591	0.810565	-4.78565	0.795429
C15orf59	-0.121636	2.50821	-0.444649	0.660346	0.885774	-5.36826	0.919145
C15orf61	0.188057	3.03434	0.760918	0.453725	0.808567	-5.29547	1.13923
C15orf62	0.190622	1.74042	1.39837	0.174117	0.592298	-4.57972	1.14126
C15orf65	0.141442	-0.590566	0.517719	0.609142	0.861461	-4.96449	1.10301
C16orf45	0.0574321	5.41242	0.513829	0.611821	0.862941	-5.72645	1.04061
C16orf46	-0.0660138	0.926331	-0.420408	0.677729	0.892795	-5.14524	0.955274
C16orf54	-0.116541	0.122549	-0.326823	0.746484	0.921213	-5.07991	0.922396
C16orf58	-0.122523	5.58754	-1.50807	0.143897	0.558736	-4.81785	0.91858
C16orf70	0.0968846	4.27958	0.933683	0.359275	0.754192	-5.35742	1.06946
C16orf71	-0.554639	-1.11894	-1.59119	0.123961	0.535524	-4.318	0.680827
C16orf72	0.0713673	5.7614	0.774411	0.44585	0.805038	-5.57236	1.05071
C16orf74	-0.310918	0.981976	-1.30744	0.202795	0.627486	-4.61099	0.806128
C16orf78	-0.95037	-6.086	-2.00214	0.0560758	0.419366	-4.02212	0.5175
C16orf86	0.0751174	2.56292	0.455227	0.65282	0.882711	-5.37362	1.05345
C16orf87	-0.142052	2.48339	-1.05268	0.302417	0.712275	-4.98827	0.906229
C16orf89	0.333675	0.159024	0.79205	0.43568	0.79943	-4.91126	1.26022
C16orf90	0.775797	-5.47496	1.33173	0.1948	0.618574	-4.50278	1.71214
C16orf91	-0.444265	2.59148	-2.43398	0.0223044	0.334335	-3.2277	0.734959
C16orf92	-0.0975311	-6.60153	-0.267721	0.79108	0.938712	-4.90983	0.934631
C16orf95	-0.140319	1.39433	-0.73934	0.466491	0.816519	-5.06518	0.907318
C16orf96	1.1083	-2.63116	2.10428	0.045431	0.395374	-3.90675	2.15591
C17orf100	0.277354	-6.34553	0.742651	0.464519	0.815488	-4.79115	1.21197
C17orf107	0.134738	-0.610932	0.304264	0.76341	0.926935	-5.0165	1.09789
C17orf47	-0.50447	-5.18826	-0.924171	0.36411	0.756231	-4.72078	0.704919
C17orf49	-0.182176	2.39549	-1.21595	0.235203	0.657236	-4.82863	0.881373
C17orf50	-0.141588	-4.34906	-0.259716	0.79718	0.940944	-4.92318	0.906521
C17orf51	-0.137784	4.02832	-0.880069	0.387088	0.771143	-5.36833	0.908914
C17orf53	-0.189303	1.60532	-0.586792	0.562533	0.838518	-5.16956	0.87703
C17orf58	-0.428791	3.2785	-1.85215	0.0756835	0.462104	-4.16136	0.742884
C17orf64	-0.0534875	-3.40968	-0.0947355	0.92527	0.979789	-4.94748	0.963604
C17orf67	0.526178	0.472314	2.08845	0.046953	0.398931	-3.78327	1.44011
C17orf75	0.120425	2.76038	0.956971	0.347619	0.746089	-5.10816	1.08706
C17orf78	1.62305	-5.37426	2.92685	0.00713175	0.320666	-3.18898	3.08024
C17orf80	0.18862	4.15721	1.69958	0.101449	0.502031	-4.47076	1.13967
C17orf97	-0.643785	0.713308	-2.12451	0.0435508	0.388785	-3.72873	0.640031
C17orf98	-0.994327	-5.25526	-1.77471	0.087956	0.485031	-4.19743	0.50197
C17orf99	0.231584	-3.58101	0.386668	0.702228	0.902818	-4.90895	1.17412
C18orf21	-0.0426888	3.43661	-0.417934	0.679514	0.893126	-5.54388	0.970844
C18orf25	0.106851	5.1649	1.15719	0.257982	0.680292	-5.22133	1.07688
C18orf32	-0.0790268	5.22977	-0.874132	0.390251	0.772222	-5.48662	0.946696
C18orf54	0.564291	1.92901	2.27168	0.0318422	0.360813	-3.48791	1.47866
C18orf63	-0.761292	-5.75571	-1.10312	0.280336	0.697743	-4.63221	0.589968
C19orf12	-0.357003	6.52442	-1.10375	0.280066	0.69741	-5.26556	0.780785
C19orf18	0.144462	0.335732	0.642493	0.526321	0.831095	-4.9983	1.10532
C19orf24	-0.301673	4.54939	-1.55731	0.131792	0.543442	-4.70271	0.811311
C19orf25	-0.116815	3.96766	-0.931264	0.360501	0.754506	-5.31823	0.922221
C19orf33	-0.724468	0.272229	-1.74312	0.0934296	0.491311	-4.1694	0.60522
C19orf38	-0.232817	0.231749	-0.732156	0.470788	0.818334	-4.94753	0.850972
C19orf44	0.210846	2.58631	1.14191	0.264162	0.684871	-4.92341	1.15737
C19orf47	-0.171157	3.48602	-1.36541	0.184116	0.606075	-4.81803	0.88813
C19orf48	-0.318707	3.90309	-2.03263	0.0526878	0.410648	-3.94594	0.801788
C19orf53	-0.208192	5.409	-1.49255	0.147894	0.56401	-4.83548	0.865621
C19orf54	0.0537213	3.96094	0.49859	0.622366	0.868776	-5.59756	1.03794
C19orf57	0.464028	0.747669	2.05057	0.050781	0.408324	-3.81748	1.37939
C19orf66	0.109382	4.47273	0.859283	0.398237	0.776565	-5.44042	1.07877
C19orf67	1.09251	-4.27594	1.72764	0.0962165	0.49418	-4.229	2.13245
C19orf70	-0.389324	5.11305	-2.30037	0.0299242	0.354704	-3.568	0.763487
C19orf71	0.0971159	0.736349	0.378645	0.708104	0.906503	-5.13461	1.06963
C19orf73	-0.162737	-1.25137	-0.513271	0.612206	0.862941	-4.92201	0.893329
C19orf81	-0.868485	-4.80734	-1.55472	0.132409	0.544392	-4.35642	0.547722
C1D	-0.0966837	4.03265	-0.771715	0.447417	0.806237	-5.44979	0.93518
C1GALT1	-0.0114342	5.00251	-0.0663943	0.947585	0.988562	-5.83045	0.992106
C1GALT1C1	-0.171062	4.189	-1.3717	0.182173	0.604054	-4.9005	0.888188
C1orf100	0.724743	-4.43445	1.2492	0.223004	0.647085	-4.55366	1.65261
C1orf105	-0.185903	-5.92718	-0.383855	0.704286	0.903986	-4.89245	0.879098
C1orf109	-0.104123	4.04248	-1.13973	0.265052	0.685182	-5.13676	0.93037
C1orf112	0.391228	2.34243	2.55411	0.0170235	0.328617	-3.03795	1.31151
C1orf115	-0.226657	6.28609	-1.21244	0.236522	0.659107	-5.16239	0.854613
C1orf116	-0.424078	-2.47794	-0.73196	0.470905	0.818374	-4.81729	0.745315
C1orf122	-0.406058	4.84713	-2.05949	0.0498556	0.40752	-3.97111	0.754683
C1orf123	-0.0107909	5.60455	-0.133513	0.894842	0.968283	-5.84668	0.992548
C1orf127	1.5587	-1.522	2.74054	0.0110788	0.323712	-3.25059	2.94589
C1orf131	0.0297283	3.7059	0.318224	0.752921	0.92283	-5.62398	1.02082
C1orf141	0.0600478	-5.2982	0.0905644	0.92855	0.981316	-4.93093	1.0425
C1orf146	0.767235	-5.11356	1.31225	0.201194	0.625569	-4.51492	1.702
C1orf158	0.388868	-5.7084	0.806881	0.42724	0.794562	-4.76838	1.30937
C1orf159	0.0234006	3.97837	0.1635	0.871421	0.96087	-5.70263	1.01635
C1orf162	0.130066	4.93792	0.432956	0.668708	0.889619	-5.7391	1.09434
C1orf167	0.358063	-4.54916	0.701105	0.489623	0.825063	-4.81366	1.2817
C1orf174	-0.0295852	4.3918	-0.223121	0.825229	0.951252	-5.74994	0.979702
C1orf185	-0.972466	-5.80977	-1.75687	0.091012	0.488514	-4.21263	0.509634
C1orf189	-0.802017	-4.42114	-1.47435	0.152697	0.568372	-4.41103	0.573547
C1orf194	-1.07713	-5.4475	-2.28148	0.0311749	0.357913	-3.78296	0.47397
C1orf198	-0.191102	6.50331	-0.912627	0.370036	0.760007	-5.44225	0.875936
C1orf21	0.0930362	6.43305	0.465203	0.645757	0.880352	-5.73269	1.06661
C1orf210	-0.447028	-3.9155	-0.684313	0.499985	0.83079	-4.82402	0.733553
C1orf216	-0.107836	4.38016	-0.904941	0.374016	0.762448	-5.39337	0.927979
C1orf226	0.0326129	2.45784	0.100109	0.921045	0.977821	-5.43893	1.02286
C1orf35	0.0606737	4.01094	0.514391	0.611434	0.862941	-5.59774	1.04295
C1orf43	-0.153146	7.30262	-1.27233	0.214803	0.638763	-5.04445	0.899287
C1orf50	-0.0133706	2.98967	-0.105958	0.916449	0.976123	-5.53512	0.990775
C1orf52	0.0746469	4.36075	0.805159	0.428215	0.795096	-5.46887	1.0531
C1orf53	-0.310672	-0.494778	-1.23139	0.229477	0.652895	-4.60011	0.806266
C1orf54	-0.013795	2.32748	-0.0459954	0.963674	0.994039	-5.41952	0.990484
C1orf56	0.0890081	2.48623	0.486143	0.631041	0.872935	-5.34823	1.06364
C1orf61	-0.564605	-2.63135	-0.8244	0.417401	0.786365	-4.77886	0.676141
C1orf68	0.0325997	-4.15647	0.0414568	0.967256	0.995417	-4.942	1.02285
C1orf74	-0.305449	0.14586	-1.47818	0.151676	0.568372	-4.42189	0.809191
C1orf87	0.971366	-4.19192	1.50965	0.143495	0.558112	-4.38673	1.9607
C1orf94	-0.695711	-6.47407	-1.75582	0.091195	0.488545	-4.21455	0.617405
C1QA	0.294179	6.42788	0.934945	0.358637	0.753681	-5.42684	1.22619
C1QB	0.283273	6.92071	0.715158	0.481046	0.822416	-5.56747	1.21695
C1QBP	-0.579756	5.48529	-3.19666	0.00370502	0.313267	-1.81311	0.669077
C1QC	0.174068	6.6949	0.55393	0.58448	0.848416	-5.67622	1.12824
C1QL1	0.946345	-1.91471	1.77205	0.0884052	0.485393	-4.18158	1.92699
C1QL2	-0.082093	-6.02818	-0.120852	0.904761	0.972176	-4.92555	0.944686
C1QL3	-0.146399	-0.318895	-0.335719	0.739845	0.919236	-5.03546	0.903503
C1QL4	-0.0395925	-5.08576	-0.0739248	0.94165	0.986501	-4.9331	0.97293
C1QTNF1	-0.424109	8.84588	-1.13501	0.266989	0.68807	-5.09744	0.745299
C1QTNF2	0.312239	1.22334	0.773702	0.446262	0.805146	-5.02567	1.24163
C1QTNF3	0.330665	2.02949	0.996946	0.328211	0.730897	-4.97274	1.25759
C1QTNF4	0.532525	0.128215	1.51993	0.140902	0.555385	-4.38396	1.44646
C1QTNF5	-0.25929	5.08066	-1.25854	0.219661	0.64433	-5.1074	0.835499
C1QTNF6	0.122181	2.98512	0.34375	0.733869	0.917388	-5.48724	1.08838
C1QTNF7	0.367391	3.97253	1.59568	0.122952	0.534195	-4.59354	1.29002
C1QTNF8	0.2877	-5.8925	0.619913	0.540847	0.831095	-4.83343	1.22069
C1QTNF9	-0.0983778	-0.398556	-0.141535	0.888566	0.966399	-5.05757	0.934083
C1QTNF9B	-0.551506	-4.54924	-0.998753	0.327352	0.730468	-4.6885	0.682308
C1R	0.141948	8.63152	0.750036	0.460137	0.813104	-5.43212	1.10339
C1RL	-2.04497e-05	6.47355	-0.000124526	0.999902	0.999902	-5.83326	0.999986
C1S	0.357698	9.60229	2.37213	0.0255776	0.346186	-3.35055	1.28138
C2	0.689207	4.93445	1.95392	0.0618273	0.431189	-4.14695	1.6124
C20orf141	-1.35527	-2.74879	-2.22425	0.0352607	0.367773	-3.80049	0.390862
C20orf144	0.312782	-6.45897	0.763912	0.451971	0.808116	-4.78316	1.2421
C20orf173	-0.135907	-6.94733	-0.612903	0.545399	0.831095	-4.83385	0.910098
C20orf194	0.249682	6.0369	2.69634	0.0122795	0.32465	-2.8318	1.18894
C20orf202	0.279705	-1.21772	0.690345	0.496249	0.829272	-4.86373	1.21395
C20orf203	0.885081	-1.01091	1.85872	0.0747141	0.461064	-4.08593	1.84687
C20orf27	-0.297947	6.00244	-1.47137	0.153495	0.569052	-4.86288	0.813409
C20orf85	-0.000596175	-6.4943	-0.00131976	0.998957	0.999394	-4.92804	0.999587
C20orf96	0.379632	2.98048	1.90932	0.0676	0.445153	-4.05229	1.30101
C21orf2	-0.234389	3.72291	-1.61802	0.118034	0.528771	-4.53499	0.850045
C21orf58	0.519252	2.08091	1.86071	0.0744224	0.46079	-4.06219	1.43321
C21orf62	0.635855	-3.3543	1.27392	0.214246	0.638343	-4.54091	1.55386
C21orf91	0.0527906	4.08346	0.333225	0.741705	0.919409	-5.67936	1.03727
C22orf15	-1.0093	-4.40678	-1.89603	0.0694083	0.450831	-4.0982	0.496786
C22orf23	0.17358	1.30795	1.10575	0.279218	0.69741	-4.80715	1.12785
C22orf31	0.115716	-5.56282	0.180592	0.858124	0.958439	-4.92312	1.08351
C22orf39	0.00226255	5.15708	0.0242805	0.980819	0.997402	-5.84149	1.00157
C22orf42	-0.450666	-6.39293	-1.10205	0.28079	0.697876	-4.63196	0.731705
C22orf46	-0.0876424	3.89906	-0.652621	0.519875	0.831095	-5.50709	0.941059
C2CD2	-0.0241521	7.23659	-0.0928329	0.926766	0.980523	-5.78226	0.983398
C2CD2L	-0.0627834	4.06829	-0.406268	0.687955	0.896628	-5.65211	0.957415
C2CD3	0.0790801	4.55714	0.798937	0.431748	0.797887	-5.4953	1.05634
C2CD4A	0.521236	-4.28932	0.826245	0.416373	0.78561	-4.76748	1.43518
C2CD4B	0.239005	1.54291	0.309834	0.75922	0.925414	-5.25729	1.18018
C2CD4C	-0.461538	2.36179	-1.27635	0.213399	0.637711	-4.76539	0.726212
C2CD4D	-0.441477	-2.90827	-0.785935	0.43919	0.801793	-4.793	0.736381
C2CD5	0.476351	5.48221	3.33497	0.00263104	0.310503	-1.51931	1.39122
C2orf15	0.458181	-3.9371	1.10986	0.277477	0.69741	-4.63393	1.37381
C2orf16	0.0961392	0.067793	0.300007	0.766618	0.928093	-5.07993	1.06891
C2orf40	0.502406	3.28854	1.38912	0.176879	0.59655	-4.76396	1.41657
C2orf42	0.0812532	3.15437	0.784038	0.440282	0.802243	-5.30039	1.05794
C2orf49	0.105422	4.55707	1.25099	0.222361	0.646788	-5.07742	1.07581
C2orf50	0.385475	-3.11807	0.704434	0.487583	0.824914	-4.82285	1.30629
C2orf54	-0.409844	-4.53706	-0.591376	0.559505	0.838021	-4.84949	0.752705
C2orf66	0.0544489	-2.90036	0.126016	0.900713	0.970731	-4.95056	1.03846
C2orf68	0.126408	4.65801	0.930441	0.360918	0.754506	-5.40099	1.09157
C2orf69	-0.133391	4.24532	-1.22403	0.232194	0.653946	-5.07406	0.911686
C2orf70	-0.738378	-5.39788	-1.23822	0.226977	0.651047	-4.55849	0.599413
C2orf71	-0.394311	-2.255	-0.77945	0.44293	0.804138	-4.80071	0.760853
C2orf72	-1.43095	-2.68905	-2.55719	0.0169045	0.328061	-3.4867	0.370886
C2orf73	0.515671	-2.52598	1.53211	0.13788	0.552198	-4.36875	1.42966
C2orf74	-0.135907	-6.94733	-0.612903	0.545399	0.831095	-4.83385	0.910098
C2orf76	-0.129287	2.62985	-1.03559	0.310169	0.719587	-5.02377	0.914283
C2orf78	-0.2066	-6.58642	-0.649512	0.521849	0.831095	-4.82267	0.866577
C2orf80	0.264856	-6.03664	0.508349	0.615603	0.864627	-4.86427	1.20152
C2orf81	0.252535	1.38262	1.00974	0.322158	0.727749	-4.88834	1.1913
C2orf83	0.0937478	-5.25561	0.164286	0.870809	0.96087	-4.92642	1.06714
C2orf88	-0.093222	2.40703	-0.431849	0.669502	0.889946	-5.35576	0.937427
C2orf91	0.618095	-4.68931	1.01241	0.320907	0.72737	-4.68124	1.53485
C3	0.321292	9.28739	1.36675	0.183701	0.605963	-4.82477	1.24945
C3AR1	0.0757851	4.4838	0.260023	0.796946	0.940789	-5.75252	1.05393
C3orf14	-0.28282	1.94001	-1.07194	0.293843	0.705965	-4.90154	0.821983
C3orf18	0.349867	3.44574	2.47584	0.0203127	0.334335	-3.17158	1.27444
C3orf20	-0.529946	-3.23706	-1.41904	0.168066	0.585772	-4.44781	0.692581
C3orf22	0.499479	-5.97762	0.876871	0.38879	0.771444	-4.73895	1.4137
C3orf30	-0.687135	-6.21454	-1.66763	0.107696	0.512839	-4.27886	0.621086
C3orf33	-0.0969923	1.79558	-0.652069	0.520225	0.831095	-5.16428	0.93498
C3orf36	-0.877293	-3.98177	-1.12499	0.271132	0.691459	-4.62555	0.544388
C3orf38	0.0446558	3.71675	0.411867	0.683898	0.894592	-5.59459	1.03144
C3orf49	0.233671	-3.97759	0.47437	0.639296	0.878017	-4.8858	1.17582
C3orf52	-1.15874	0.374478	-3.03703	0.00547047	0.313267	-2.56614	0.447904
C3orf56	0.0980867	-5.831	0.178958	0.859393	0.958899	-4.92193	1.07035
C3orf58	0.189671	3.92715	1.10827	0.278149	0.69741	-5.15248	1.1405
C3orf62	0.147955	3.81819	1.22048	0.233512	0.655393	-5.02349	1.108
C3orf67	0.621052	-0.383165	2.02909	0.0530723	0.411129	-3.8926	1.538
C3orf70	-0.120724	2.46811	-0.40499	0.688882	0.896933	-5.37559	0.919726
C3orf80	-0.448182	-0.586203	-0.924506	0.363939	0.756231	-4.78889	0.732966
C3orf84	-0.0532703	-5.98925	-0.100833	0.920477	0.977693	-4.92682	0.963749
C4A	0.337916	1.3213	1.36223	0.185107	0.606527	-4.5834	1.26393
C4B	0.209329	0.759742	0.550576	0.586743	0.849411	-5.08031	1.15615
C4BPA	-0.100616	-3.92393	-0.162631	0.872098	0.961236	-4.9378	0.932635
C4BPB	0.488841	-0.700732	0.866255	0.394474	0.774138	-4.81309	1.40332
C4orf17	-1.37945	-6.19481	-3.23587	0.00336383	0.31302	-2.90612	0.384365
C4orf19	-0.990015	1.52078	-2.23847	0.0342025	0.36644	-3.54656	0.503473
C4orf3	-0.161468	7.27457	-1.9562	0.0615441	0.43056	-4.11475	0.894115
C4orf33	0.144214	2.68689	0.684614	0.499798	0.830698	-5.28396	1.10513
C4orf36	0.18334	1.37577	1.09686	0.283013	0.698844	-4.82068	1.13551
C4orf45	0.454907	-3.28361	0.958779	0.346725	0.745385	-4.71417	1.37069
C4orf46	0.0480237	2.5262	0.250133	0.8045	0.944278	-5.42866	1.03385
C4orf47	0.0283164	-2.09707	0.0745542	0.941155	0.986095	-4.96305	1.01982
C4orf48	-0.933941	0.621941	-2.02	0.054069	0.414348	-3.85811	0.523427
C4orf50	-0.283221	-5.6027	-0.513255	0.612216	0.862941	-4.86471	0.821755
C4orf51	-0.390708	-6.68779	-1.08651	0.287476	0.701629	-4.63982	0.762755
C5	0.460094	3.77479	1.89421	0.0696595	0.451643	-4.14839	1.37563
C5AR1	-0.378227	4.72225	-1.12146	0.272603	0.692386	-5.22915	0.769383
C5AR2	0.0831563	2.65702	0.32618	0.746965	0.921682	-5.43307	1.05933
C5orf15	-0.10517	5.42973	-1.00122	0.326179	0.730095	-5.38342	0.929695
C5orf22	-0.061493	4.23639	-0.598554	0.554781	0.835185	-5.58639	0.958272
C5orf24	-0.00240944	5.8136	-0.0238056	0.981194	0.997402	-5.85478	0.998331
C5orf30	-0.413616	4.46662	-1.15096	0.260488	0.681873	-5.17517	0.750739
C5orf34	0.41066	0.819772	1.63804	0.113767	0.523724	-4.28329	1.32929
C5orf38	0.46641	2.4652	1.81336	0.0816326	0.474034	-4.14654	1.38167
C5orf46	-0.483129	-5.93979	-0.814222	0.4231	0.791465	-4.76479	0.715424
C5orf47	-0.084759	-5.15355	-0.130198	0.897437	0.969541	-4.92968	0.942942
C5orf49	-0.0926895	-2.05149	-0.167727	0.868128	0.960793	-4.95774	0.937773
C5orf51	0.212699	5.26584	1.79628	0.0843769	0.478209	-4.40483	1.15885
C5orf52	-0.56539	-6.60153	-1.53871	0.136264	0.550591	-4.36926	0.675773
C5orf58	0.731767	0.782758	2.80132	0.0096069	0.321994	-2.82049	1.66067
C5orf60	-0.449522	-5.93688	-0.8874	0.383205	0.768197	-4.73455	0.732285
C5orf63	-0.0280553	2.08574	-0.139427	0.890214	0.966755	-5.37152	0.980741
C6	0.522042	4.3464	1.03146	0.312063	0.720418	-5.27882	1.43599
C6orf10	0.223868	-5.88738	0.377754	0.708757	0.906588	-4.89377	1.16786
C6orf106	-0.0624001	7.309	-0.303363	0.764088	0.926935	-5.73816	0.95767
C6orf118	-0.618475	-6.28058	-1.30795	0.202627	0.627444	-4.51682	0.651359
C6orf120	-0.172771	5.22524	-1.46096	0.156308	0.571632	-4.8708	0.887137
C6orf132	0.0798849	2.58169	0.282095	0.780161	0.934192	-5.43119	1.05693
C6orf136	0.195926	3.64008	1.58307	0.125802	0.536841	-4.57115	1.14546
C6orf141	0.375284	3.45129	1.06805	0.295561	0.707758	-5.12078	1.29709
C6orf15	0.831615	-5.63877	1.74313	0.0934292	0.491311	-4.22245	1.77968
C6orf163	0.294818	0.0260248	1.09109	0.285496	0.70066	-4.72198	1.22673
C6orf201	0.724359	1.06528	2.84571	0.00865088	0.321177	-2.71209	1.65217
C6orf203	-0.117317	3.35729	-1.08971	0.286091	0.700982	-5.08626	0.921901
C6orf222	-0.194509	-5.5402	-0.356658	0.724299	0.913717	-4.89928	0.87387
C6orf223	-0.60444	-4.96627	-0.978803	0.336925	0.738713	-4.69639	0.657727
C6orf226	0.0638605	2.23653	0.335367	0.740107	0.919236	-5.35804	1.04526
C6orf47	-0.197349	3.98918	-2.04072	0.0518199	0.409355	-3.94044	0.872152
C6orf48	0.0307217	6.41025	0.215028	0.831466	0.953108	-5.81438	1.02152
C6orf52	-0.46578	-1.38636	-1.26906	0.215949	0.640184	-4.55286	0.724079
C6orf58	-0.778815	-3.5684	-1.54958	0.133636	0.546282	-4.35779	0.582845
C6orf62	-0.068318	7.22874	-0.507544	0.61616	0.864666	-5.66599	0.953749
C6orf89	0.00556121	6.99979	0.0508111	0.959874	0.992749	-5.80078	1.00386
C7	0.232508	6.95779	0.651757	0.520423	0.831095	-5.60542	1.17488
C7orf25	-0.0746673	3.51593	-0.587679	0.561946	0.838518	-5.48109	0.949561
C7orf26	-0.159727	4.8968	-1.57952	0.126614	0.536972	-4.6984	0.895194
C7orf31	0.423941	2.51163	3.14788	0.00417627	0.313267	-2.0011	1.34159
C7orf33	-0.267997	-6.88129	-1.08345	0.288806	0.701648	-4.64133	0.830471
C7orf43	-0.310417	3.87749	-2.2825	0.0311063	0.357846	-3.53086	0.806409
C7orf50	-0.285093	4.99744	-1.88486	0.070962	0.453799	-4.25884	0.820689
C7orf55-LUC7L2	0.0615606	7.04805	0.617756	0.542246	0.831095	-5.61985	1.04359
C7orf57	-0.314921	-3.40839	-0.680797	0.502171	0.831054	-4.82911	0.803895
C7orf61	0.415471	-1.9077	1.34071	0.191906	0.614071	-4.50136	1.33373
C8A	-1.19117	-5.90167	-2.58296	0.015941	0.327865	-3.51734	0.437947
C8B	-0.589728	-6.06735	-1.1199	0.273255	0.693007	-4.62295	0.664468
C8G	-0.385077	-1.21116	-1.10848	0.278061	0.69741	-4.65735	0.765738
C8orf33	-0.210396	5.87791	-1.53753	0.136551	0.551009	-4.77824	0.8643
C8orf34	-0.697123	0.16934	-1.41989	0.167821	0.58542	-4.47373	0.616801
C8orf37	0.197502	1.51394	0.852461	0.40194	0.778277	-5.01183	1.14671
C8orf44	0.417119	2.15977	1.80845	0.0824131	0.475323	-4.1341	1.33526
C8orf48	-0.145059	-0.160641	-0.533301	0.598469	0.855581	-4.99484	0.904342
C8orf58	-0.287443	3.8624	-2.48218	0.0200259	0.334335	-3.17922	0.819353
C8orf59	-0.0207511	4.28431	-0.23047	0.819576	0.949168	-5.7345	0.985719
C8orf74	-0.331706	-6.58642	-0.892833	0.380343	0.767029	-4.73123	0.794596
C8orf76	-0.195027	3.90189	-1.63868	0.113632	0.523724	-4.52777	0.873557
C8orf82	-0.0593564	4.59325	-0.259797	0.797119	0.940932	-5.76478	0.959692
C8orf86	1.32392	-5.57063	2.90186	0.00757026	0.321177	-3.21605	2.50345
C9	-0.126784	-2.7039	-0.238217	0.813628	0.946366	-4.94149	0.915871
[truncated: 16,297 more rows]

## Sheet: 40-49
gene_symbol	logFC	AveExpr	t	P.Value	adj.P.Val	B	FC
A1BG	0.0637689	1.55748	0.311972	0.756531	0.913649	-5.45733	1.04519
A1CF	0.166504	-4.84854	0.344276	0.732274	0.903707	-5.07305	1.12234
A2M	0.217907	10.4383	1.50596	0.139202	0.514609	-4.78504	1.16305
A2ML1	0.56472	-1.15406	1.04605	0.301233	0.672577	-4.78742	1.4791
A3GALT2	-0.0473624	-3.98397	-0.0918172	0.927259	0.97571	-5.11063	0.967704
A4GALT	0.14945	5.70012	0.929788	0.35754	0.718377	-5.71378	1.10915
A4GNT	-0.328471	-2.46486	-0.58473	0.561708	0.840936	-5.00413	0.79638
AAAS	0.00361827	5.40944	0.0419145	0.966756	0.989244	-6.12712	1.00251
AACS	-0.189154	5.66498	-0.496558	0.621966	0.871093	-6.01124	0.87712
AADAC	-0.224845	1.62761	-0.287819	0.774833	0.920984	-5.47536	0.855687
AADACL2	-0.545405	-4.1985	-0.989798	0.327669	0.696036	-4.79458	0.685199
AADACL3	-0.638005	-3.66642	-0.90814	0.368738	0.725874	-4.84529	0.642601
AADACL4	-0.728168	-5.90931	-1.63596	0.108962	0.475251	-4.26506	0.60367
AADAT	0.313797	2.48621	2.24758	0.0296511	0.326096	-3.52485	1.24297
AAED1	-0.122643	4.86198	-1.26428	0.212766	0.596175	-5.33513	0.918504
AAGAB	-0.154295	4.78111	-1.83571	0.073145	0.416087	-4.51601	0.898571
AAK1	-0.112697	3.86305	-0.587923	0.559581	0.839961	-5.79403	0.924858
AAMDC	-0.124128	3.53744	-0.84888	0.40053	0.74775	-5.55696	0.917558
AAMP	-0.165905	6.81244	-1.52789	0.133676	0.507475	-4.97976	0.891369
AANAT	-0.151236	-3.77528	-0.317754	0.75217	0.911984	-5.0807	0.900479
AAR2	-0.208878	5.4947	-2.12866	0.0389022	0.348332	-4.03171	0.86521
AARD	0.493921	-4.19545	0.855752	0.396758	0.744986	-4.87407	1.40827
AARS	-0.0754969	6.96707	-0.777906	0.440775	0.775371	-5.78027	0.949015
AARS2	-0.0820054	3.68335	-0.606741	0.547132	0.83444	-5.75001	0.944744
AARSD1	-0.0491796	4.49484	-0.740668	0.462818	0.789911	-5.79438	0.966486
AASDH	-0.0663818	3.5685	-0.828538	0.411825	0.757776	-5.57884	0.95503
AASDHPPT	-0.120189	4.63956	-1.39129	0.171114	0.552564	-5.15795	0.920067
AASS	-0.211739	5.67756	-0.677365	0.501711	0.81139	-5.9086	0.863496
AATF	-0.0120976	5.58101	-0.141346	0.88824	0.964175	-6.12109	0.99165
AATK	0.13375	3.29683	0.434902	0.665753	0.891601	-5.75663	1.09714
ABAT	-0.13296	3.77147	-0.646406	0.521364	0.821796	-5.74311	0.911958
ABCA1	-0.394206	7.4309	-1.90675	0.0630769	0.399	-4.35519	0.760908
ABCA10	0.63055	5.09185	2.09507	0.041938	0.355473	-4.08206	1.54816
ABCA12	0.996094	-4.00164	1.93853	0.0589714	0.389876	-3.94076	1.99459
ABCA13	-0.390171	-3.3714	-0.535745	0.594825	0.858051	-5.02066	0.763039
ABCA2	0.141883	6.52906	0.918105	0.363555	0.722217	-5.6945	1.10334
ABCA3	0.0181225	5.25221	0.129403	0.897627	0.966678	-6.11456	1.01264
ABCA4	0.219497	0.342583	0.908638	0.368477	0.72577	-4.99851	1.16433
ABCA5	-0.0333024	6.28454	-0.178783	0.858927	0.95477	-6.0982	0.977181
ABCA6	0.329461	6.58665	1.53245	0.132549	0.505765	-4.98624	1.25654
ABCA7	-0.125776	4.50976	-0.537841	0.593389	0.857742	-5.92046	0.916511
ABCA8	0.137404	6.60387	0.520766	0.605133	0.863801	-5.96423	1.09992
ABCA9	0.318693	7.25205	1.28952	0.203937	0.588711	-5.26271	1.2472
ABCB1	-0.0288786	2.36081	-0.10667	0.915534	0.971853	-5.64301	0.980182
ABCB10	-0.0876207	4.62069	-0.93316	0.355815	0.716722	-5.65549	0.941073
ABCB11	-0.00833272	1.42981	-0.0163133	0.987058	0.996206	-5.47735	0.994241
ABCB4	0.803947	0.747834	2.35879	0.0228272	0.315273	-3.2862	1.74587
ABCB5	1.03446	0.364866	1.61384	0.113692	0.481834	-4.33652	2.04835
ABCB6	-0.176039	1.61448	-1.09445	0.279697	0.653698	-5.00265	0.88513
ABCB7	0.153606	4.59237	2.30375	0.0260054	0.318312	-3.649	1.11235
ABCB8	-0.22385	4.70319	-2.08853	0.0425518	0.356338	-4.06897	0.856277
ABCB9	0.0516801	3.21061	0.331684	0.741698	0.906952	-5.77562	1.03647
ABCC1	0.0180105	5.63909	0.181929	0.856472	0.953778	-6.11492	1.01256
ABCC10	0.014755	4.39632	0.138985	0.890095	0.964589	-6.03573	1.01028
ABCC11	-0.402705	-2.3937	-0.753453	0.455179	0.785561	-4.93054	0.756439
ABCC12	-0.0345393	-6.27896	-0.0917193	0.927336	0.97571	-5.11385	0.976343
ABCC2	0.324101	2.27494	1.59413	0.118046	0.488175	-4.53067	1.25188
ABCC3	0.236014	4.74359	0.878092	0.38465	0.737855	-5.71546	1.17773
ABCC4	-0.118872	3.00785	-0.666459	0.508587	0.814664	-5.57876	0.920907
ABCC5	0.157498	5.63304	0.655651	0.515452	0.818462	-5.92247	1.11535
ABCC6	-0.163072	2.40261	-0.432497	0.667487	0.892779	-5.57257	0.893122
ABCC8	0.62921	-0.249714	1.72954	0.0907035	0.446442	-4.17844	1.54672
ABCC9	0.103982	6.39982	0.713975	0.479002	0.799721	-5.86116	1.07474
ABCD1	-0.439886	5.62338	-1.70143	0.0958993	0.454406	-4.76579	0.737193
ABCD2	-0.648988	4.39824	-1.29216	0.203029	0.587875	-5.25424	0.637727
ABCD3	-0.0671262	5.45385	-0.807655	0.423622	0.766262	-5.81349	0.954538
ABCD4	0.136981	5.54094	0.999825	0.322847	0.69288	-5.64874	1.0996
ABCE1	-0.344118	5.58613	-2.47564	0.0172088	0.297693	-3.34118	0.787789
ABCF1	-0.184393	6.32508	-1.86892	0.068281	0.408922	-4.47875	0.880019
ABCF2	-0.299897	5.61397	-2.44368	0.0186055	0.300965	-3.40825	0.81231
ABCF3	-0.166265	5.60821	-2.04767	0.0465735	0.363251	-4.18195	0.891147
ABCG1	-0.0627244	5.00982	-0.251255	0.802783	0.932639	-6.07829	0.957454
ABCG2	0.455036	2.30038	1.71714	0.0929652	0.450208	-4.36378	1.37082
ABCG4	0.336877	-1.63836	1.05533	0.297019	0.669389	-4.76199	1.26302
ABCG5	-0.194005	-2.67675	-0.474162	0.637722	0.877872	-5.04225	0.874176
ABCG8	0.0588234	-3.94541	0.0967201	0.923387	0.974428	-5.11043	1.04162
ABHD1	-0.0228622	0.101798	-0.0978828	0.922469	0.974254	-5.28345	0.984278
ABHD10	0.00163686	4.23244	0.022199	0.982389	0.994784	-6.02107	1.00114
ABHD11	-0.135948	3.52923	-1.10076	0.276969	0.651482	-5.32834	0.910072
ABHD12	0.0151393	5.6574	0.159002	0.874393	0.959024	-6.11879	1.01055
ABHD12B	0.192018	-0.831673	0.800926	0.427466	0.768379	-4.96186	1.14236
ABHD13	-0.130278	4.14894	-1.36611	0.178826	0.562481	-5.12986	0.913655
ABHD14A	-0.0773117	3.66684	-0.493274	0.624265	0.871799	-5.80574	0.947822
ABHD14B	-0.212378	6.28859	-1.52105	0.135382	0.510193	-5.01722	0.863114
ABHD15	-0.479269	5.42396	-1.47716	0.146735	0.52323	-5.09125	0.717341
ABHD16A	-0.0258018	5.05819	-0.274478	0.784998	0.925252	-6.07571	0.982275
ABHD16B	-0.101019	2.00444	-0.544538	0.588812	0.855398	-5.44879	0.932374
ABHD17A	-0.0692322	6.19528	-0.679735	0.500223	0.810698	-5.8942	0.953145
ABHD17B	-0.166811	3.76804	-1.84445	0.0718375	0.414179	-4.38255	0.890809
ABHD17C	0.115346	2.00327	0.665512	0.509187	0.814819	-5.38481	1.08323
ABHD2	0.0434911	6.4801	0.352527	0.726121	0.903707	-6.04273	1.0306
ABHD3	-0.0768542	3.9736	-0.67154	0.505377	0.812733	-5.76352	0.948123
ABHD4	0.0348968	6.01972	0.379257	0.706316	0.903707	-6.05485	1.02448
ABHD5	-0.772816	5.42209	-2.33998	0.0238716	0.316902	-3.61912	0.585274
ABHD6	-0.420934	4.32635	-2.69485	0.00992525	0.28231	-2.80496	0.746941
ABHD8	-0.0937041	3.37771	-0.681493	0.499121	0.810463	-5.64483	0.937114
ABI1	0.0994323	6.06107	1.35847	0.18122	0.564908	-5.24334	1.07135
ABI2	0.239889	5.32829	1.64422	0.107238	0.472746	-4.84865	1.1809
ABI3	0.0333657	3.19215	0.160908	0.8729	0.958616	-5.81097	1.0234
ABI3BP	0.651279	6.59753	1.84178	0.0722339	0.414693	-4.51094	1.57056
ABL1	-0.0470343	7.55112	-0.37176	0.711851	0.903707	-5.96268	0.967924
ABL2	0.112752	5.92643	1.03085	0.308226	0.678521	-5.61607	1.08129
ABLIM1	0.191438	8.49996	1.37608	0.175741	0.557859	-5.07176	1.1419
ABLIM2	0.0302478	4.25974	0.130115	0.897067	0.966678	-6.01732	1.02119
ABLIM3	-0.3579	7.73697	-1.54554	0.129359	0.50401	-4.89702	0.780299
ABO	0.3722	0.287644	1.21831	0.229578	0.610385	-4.74469	1.29433
ABR	0.239222	7.01075	2.44103	0.0187258	0.301268	-3.36989	1.18036
ABRA	0.247093	-2.97624	0.393792	0.695631	0.903353	-5.06483	1.18681
ABRACL	-0.396262	2.90473	-1.72099	0.092258	0.448783	-4.44222	0.759825
ABT1	-0.175918	4.30291	-2.06771	0.0445615	0.360494	-4.06839	0.885204
ABTB1	0.0681939	6.4081	0.552319	0.583517	0.852699	-5.95934	1.0484
ABTB2	0.229885	2.85065	0.884681	0.381124	0.735792	-5.39307	1.17274
AC003006.1	0.208579	-6.72223	1.06121	0.29437	0.667446	-4.75188	1.15555
AC004593.3	0.0957375	-6.2848	0.294475	0.769776	0.919212	-5.088	1.06861
AC005154.6	-0.168221	4.97637	-1.21113	0.232292	0.613589	-5.40519	0.88994
AC005702.1	0.157392	-6.36465	0.519021	0.606339	0.864645	-5.02835	1.11527
AC006486.1	-0.161951	-2.51025	-0.452305	0.653265	0.886193	-5.04916	0.893815
AC007040.2	0.0556475	-6.83281	0.340064	0.735422	0.903707	-5.08201	1.03933
AC008397.1	0.12976	-6.77881	0.701786	0.486498	0.803194	-4.9576	1.09411
AC010323.1	0.0556475	-6.83281	0.340064	0.735422	0.903707	-5.08201	1.03933
AC010327.1	0.0556475	-6.83281	0.340064	0.735422	0.903707	-5.08201	1.03933
AC010522.1	-0.111687	-5.77591	-0.294701	0.769604	0.919204	-5.08508	0.925505
AC011499.1	0.182019	-6.74195	0.836423	0.407424	0.753934	-4.88983	1.13447
AC012314.20	0.226918	-6.57737	0.860946	0.393922	0.743587	-4.87546	1.17033
AC012314.8	0.348495	-0.40059	1.77631	0.0825767	0.432797	-4.12038	1.27323
AC017083.3	0.0556475	-6.83281	0.340064	0.735422	0.903707	-5.08201	1.03933
AC018512.1	0.0556475	-6.83281	0.340064	0.735422	0.903707	-5.08201	1.03933
AC020915.1	-0.0957423	-4.61334	-0.227373	0.821184	0.940272	-5.09516	0.935791
AC040162.1	0.263529	-5.96178	0.766729	0.447325	0.780473	-4.9221	1.20041
AC068896.1	0.157857	-6.75909	0.825253	0.413667	0.759197	-4.89595	1.11563
AC068946.1	0.118914	-6.59451	0.508198	0.613846	0.867831	-5.03343	1.08592
AC078864.2	0.0556475	-6.83281	0.340064	0.735422	0.903707	-5.08201	1.03933
AC093323.1	-0.353922	-6.54051	-1.23329	0.223998	0.605517	-4.62525	0.782454
AC093668.1	-0.076718	-6.79595	-0.425025	0.672884	0.89442	-5.0603	0.948212
AC093668.2	0.108474	0.0515216	0.368064	0.714585	0.903707	-5.22942	1.07809
AC096887.1	0.0556475	-6.83281	0.340064	0.735422	0.903707	-5.08201	1.03933
AC098650.1	0.0556475	-6.83281	0.340064	0.735422	0.903707	-5.08201	1.03933
AC105052.1	0.0649773	-6.42994	0.224697	0.823252	0.94088	-5.101	1.04607
AC107871.1	0.0556475	-6.83281	0.340064	0.735422	0.903707	-5.08201	1.03933
AC131160.1	-0.0795656	-6.33622	-0.250454	0.803398	0.932939	-5.09628	0.946343
AC138647.1	-0.0753154	-6.79595	-0.436608	0.664525	0.89103	-5.057	0.949135
ACAA1	-0.116781	5.72108	-1.18737	0.241433	0.621322	-5.45472	0.922243
ACAA2	-0.567638	7.24933	-2.69789	0.009848	0.28231	-2.80781	0.674721
ACACA	-0.175722	6.10402	-0.705939	0.483937	0.802614	-5.88052	0.885325
ACACB	-0.755205	9.78279	-1.67523	0.100962	0.462037	-4.58308	0.592462
ACAD10	-0.0568426	4.69852	-0.562399	0.57669	0.848957	-5.9289	0.961366
ACAD11	-0.322796	-5.57839	-0.635303	0.528512	0.82564	-4.98067	0.799519
ACAD8	-0.206677	4.9334	-2.68259	0.0102425	0.28231	-2.87413	0.866531
ACAD9	-0.263053	5.33581	-2.7039	0.00969698	0.28231	-2.8411	0.833322
ACADL	0.205404	3.60181	0.731091	0.468588	0.794012	-5.65626	1.15301
ACADM	-0.239146	5.65625	-1.83405	0.0733952	0.417122	-4.55307	0.847247
ACADS	-0.51921	6.15546	-2.59695	0.0127312	0.284161	-3.07355	0.697754
ACADSB	0.0832842	5.27726	0.575222	0.568063	0.844094	-5.96319	1.05943
ACADVL	-0.274896	8.77109	-2.55109	0.014281	0.286559	-3.05803	0.82651
ACAN	1.27957	0.0330279	2.24286	0.029977	0.32712	-3.48893	2.42767
ACAP1	-0.172354	2.77921	-0.875871	0.385843	0.738712	-5.3861	0.887394
ACAP2	0.0782262	6.08223	1.12417	0.267019	0.643461	-5.51599	1.05572
ACAP3	0.0905811	5.78684	0.605003	0.548276	0.835146	-5.95254	1.0648
ACAT1	-0.193458	6.73585	-1.24148	0.220986	0.601971	-5.3523	0.874507
ACAT2	-0.0450402	3.69625	-0.26823	0.789773	0.927016	-5.89258	0.969263
ACBD3	-0.121278	5.78214	-1.39185	0.170943	0.552495	-5.20678	0.919373
ACBD4	0.221014	4.16648	1.54821	0.128714	0.502984	-4.88946	1.16555
ACBD5	-0.0694807	5.06265	-0.775266	0.442317	0.776665	-5.82215	0.952981
ACBD6	0.0176719	4.59914	0.206217	0.83757	0.946573	-6.05013	1.01232
ACBD7	-0.698353	-2.88136	-1.70703	0.0948442	0.452925	-4.19282	0.616275
ACCS	0.189446	4.9562	1.36893	0.177951	0.560909	-5.21339	1.14033
ACCSL	-0.365559	-5.11505	-0.636664	0.527633	0.825061	-4.97936	0.776168
ACD	0.204431	4.19936	1.85321	0.0705468	0.412857	-4.42718	1.15223
ACE	0.377017	4.68	0.970189	0.33724	0.704027	-5.62832	1.29865
ACE2	-0.505933	2.19932	-0.664551	0.509796	0.814987	-5.42064	0.704205
ACER1	0.702503	-4.13024	1.51623	0.136594	0.511828	-4.38053	1.62733
ACER2	-0.313249	3.43809	-1.08175	0.28524	0.660017	-5.33048	0.804827
ACER3	-0.248984	5.55477	-1.87497	0.0674242	0.407576	-4.48425	0.841489
ACHE	0.276897	0.623936	0.797372	0.429505	0.769903	-5.10334	1.21159
ACIN1	-0.000856655	7.25029	-0.0119544	0.990516	0.997603	-6.05123	0.999406
ACKR2	0.362945	3.09486	1.07635	0.287621	0.661406	-5.27041	1.28605
ACKR3	0.16535	6.89287	0.556551	0.580646	0.850823	-5.9269	1.12144
ACKR4	0.0647606	2.59555	0.113286	0.910318	0.970527	-5.69044	1.04591
ACLY	-0.105155	7.19552	-0.416439	0.679108	0.897013	-5.97154	0.929705
ACMSD	0.235522	-5.25103	0.569344	0.57201	0.845881	-5.00595	1.17733
ACO1	-0.592023	8.01301	-2.05654	0.045673	0.361825	-4.06043	0.663412
ACO2	-0.267574	6.27919	-1.35751	0.181522	0.565327	-5.23599	0.830715
ACOT1	-0.304684	3.77971	-1.00312	0.321272	0.691679	-5.46885	0.80962
ACOT11	0.69789	0.574462	2.35653	0.0229504	0.315573	-3.29467	1.62213
ACOT12	0.901208	-4.53381	2.03108	0.048298	0.366321	-3.83338	1.86763
ACOT13	-0.173874	3.8642	-1.46253	0.150682	0.528701	-4.9621	0.886459
ACOT2	-0.528851	5.77976	-2.41031	0.0201727	0.307195	-3.47705	0.693107
ACOT4	-0.336312	2.69082	-1.15666	0.253637	0.632084	-5.11483	0.792064
ACOT6	0.264732	-4.28401	0.552159	0.583625	0.852773	-5.01265	1.20141
ACOT7	-0.074598	3.72817	-0.614076	0.542318	0.833075	-5.75421	0.949607
ACOT8	-0.0550911	3.40107	-0.745294	0.460046	0.788965	-5.60717	0.962534
ACOT9	-0.0520661	5.64278	-0.79311	0.431958	0.771654	-5.8266	0.964554
ACOX1	-0.480154	6.73322	-1.84039	0.0724425	0.415189	-4.50607	0.716901
ACOX2	0.268263	4.24828	1.83631	0.0730545	0.41596	-4.46101	1.20436
ACOX3	-0.104295	4.21237	-1.25141	0.217379	0.599058	-5.27777	0.930259
ACOXL	0.110492	-2.45203	0.283376	0.778214	0.92153	-5.09023	1.0796
ACP1	-0.0468259	5.59869	-0.691767	0.492708	0.806456	-5.89887	0.968064
ACP2	-0.276422	5.45294	-1.7381	0.0891676	0.444264	-4.70666	0.825636
ACP5	0.516243	4.48366	0.936642	0.354041	0.715511	-5.63665	1.43023
ACP6	0.433988	3.35283	2.64295	0.0113329	0.28231	-2.82577	1.35096
ACPP	-0.696757	-0.689143	-1.90827	0.0628748	0.399	-3.95943	0.616957
ACR	0.0388017	1.31091	0.117311	0.907146	0.969406	-5.45223	1.02726
ACRBP	0.0512386	0.72976	0.211537	0.833442	0.945511	-5.35195	1.03615
ACRV1	0.538756	-4.83496	1.16636	0.249735	0.628241	-4.67297	1.45272
ACSBG1	-0.0622265	-1.02243	-0.271628	0.787175	0.925855	-5.14489	0.957785
ACSBG2	0.682907	-3.0227	1.51664	0.136489	0.511828	-4.38068	1.60537
ACSF2	-0.412397	5.51542	-1.96605	0.0556043	0.381281	-4.32712	0.751374
ACSF3	-0.0842874	4.14342	-0.873947	0.386879	0.739258	-5.64311	0.94325
ACSL1	-0.750482	10.0934	-1.72495	0.0915346	0.447897	-4.49245	0.594405
ACSL3	-0.0728726	5.77443	-0.865829	0.391267	0.742527	-5.76808	0.950743
ACSL4	-0.269834	6.41444	-1.89719	0.064359	0.403545	-4.42694	0.829415
ACSL5	-0.537906	5.59066	-3.02117	0.00417904	0.27548	-2.104	0.68877
ACSL6	0.325662	-1.15211	1.16263	0.251229	0.629879	-4.70155	1.25324
ACSM1	0.0187674	-2.13168	0.0460753	0.963458	0.98819	-5.11758	1.01309
ACSM2A	-0.335742	-2.64768	-0.704627	0.484745	0.802895	-4.95331	0.792377
ACSM2B	-0.415548	-2.45281	-0.790626	0.433391	0.771912	-4.91172	0.749734
ACSM3	0.138383	-0.749455	0.569778	0.571718	0.845518	-5.07958	1.10067
ACSM4	0.202668	-3.69316	0.511549	0.611517	0.866459	-5.02814	1.15082
ACSM5	-0.174924	4.66157	-0.599327	0.55202	0.837156	-5.9044	0.885814
ACSS1	0.150892	5.17845	1.14422	0.258702	0.636794	-5.49119	1.11026
ACSS2	-0.0984175	7.28661	-0.473403	0.638259	0.877957	-5.94062	0.934057
ACSS3	-0.17676	5.74396	-0.718644	0.476148	0.79789	-5.88045	0.884687
ACTA1	0.899066	3.16191	1.57834	0.12163	0.493861	-4.68789	1.86486
ACTA2	0.643933	8.54964	1.60269	0.116138	0.485565	-4.7626	1.56258
ACTB	-0.0553541	11.8374	-0.38352	0.703176	0.903707	-5.65603	0.962358
ACTBL2	-0.0774402	-6.46938	-0.241083	0.810608	0.93603	-5.09872	0.947738
ACTC1	1.73759	1.99507	2.66491	0.0107162	0.28231	-2.71378	3.33477
ACTG1	0.0746934	10.8011	0.553401	0.582782	0.852107	-5.64891	1.05314
ACTG2	0.834855	5.44071	1.15262	0.255271	0.632908	-5.49107	1.78368
ACTL10	-0.0455789	-0.326755	-0.179008	0.858751	0.954747	-5.22596	0.968901
ACTL6A	-0.155248	4.76873	-2.00408	0.0512238	0.370467	-4.22657	0.897978
ACTL6B	-0.417712	-5.26611	-0.808231	0.423294	0.765821	-4.89912	0.748611
ACTL7A	0.0776069	-5.81895	0.170322	0.865535	0.956807	-5.10432	1.05527
ACTL7B	-0.894144	-5.27617	-1.84286	0.0720742	0.414636	-4.04831	0.538066
ACTL8	0.188352	-6.34166	0.548542	0.586084	0.853989	-5.01785	1.13946
ACTL9	-0.402825	-6.18552	-1.23724	0.222543	0.60409	-4.62103	0.756376
ACTN1	0.186711	8.27341	1.03696	0.305404	0.676622	-5.46561	1.13817
ACTN2	0.815608	1.28126	1.83794	0.0728092	0.4157	-4.09722	1.76004
ACTN3	0.249296	-1.21984	0.541077	0.591176	0.856302	-5.05465	1.18863
ACTN4	0.046238	8.96112	0.33837	0.736689	0.904126	-5.86622	1.03257
ACTR10	-0.0838944	5.73126	-1.57112	0.123299	0.495566	-4.96118	0.943507
ACTR1A	-0.100055	7.13956	-1.32238	0.192855	0.577996	-5.23015	0.932998
ACTR1B	-0.0251878	6.21804	-0.352413	0.726207	0.903707	-6.05654	0.982693
ACTR2	-0.182015	7.52976	-2.01325	0.0502132	0.368916	-4.16507	0.881471
ACTR3	-0.122815	7.11302	-0.96095	0.341813	0.706894	-5.619	0.918394
ACTR3B	-0.043788	2.94124	-0.39002	0.698398	0.903707	-5.69917	0.970104
ACTR3C	-0.20096	-1.05267	-0.565749	0.57443	0.847543	-5.05706	0.869972
ACTR5	0.0507645	3.69495	0.708711	0.482231	0.801311	-5.68906	1.03581
ACTR6	-0.0312502	4.14164	-0.450064	0.654868	0.887184	-5.90967	0.978572
ACTR8	-0.0193794	4.15407	-0.236946	0.813795	0.937163	-5.98187	0.986657
ACTRT1	-0.0628866	-6.72481	-0.262975	0.793794	0.928184	-5.09678	0.957347
ACTRT2	-0.442359	-5.99521	-1.03314	0.307167	0.678085	-4.76771	0.73593
ACTRT3	-0.0498951	1.21538	-0.239758	0.811628	0.936258	-5.41879	0.966007
ACVR1	0.149177	5.46555	1.29923	0.200614	0.585434	-5.32242	1.10894
ACVR1B	-0.0433568	5.53455	-0.330275	0.742755	0.907371	-6.07731	0.970394
ACVR1C	-0.595581	5.82461	-1.29198	0.20309	0.587875	-5.3315	0.661778
ACVR2A	0.068413	4.5171	0.607287	0.546773	0.834265	-5.88317	1.04856
ACVR2B	0.285428	3.52736	2.00971	0.0506007	0.36942	-4.07043	1.21877
ACVRL1	-0.190209	6.69717	-1.61201	0.114091	0.482469	-4.86534	0.876479
ACY1	-0.370655	4.25506	-2.17685	0.0348845	0.338218	-3.86165	0.773431
ACY3	-0.600604	-5.0824	-1.03213	0.307634	0.678085	-4.76671	0.659478
ACYP1	0.187266	2.2706	1.22156	0.228361	0.60883	-4.97577	1.1386
ACYP2	-0.158416	3.59552	-1.10058	0.277047	0.651582	-5.34076	0.896009
ADA	0.0693617	4.29207	0.492556	0.624768	0.871799	-5.91355	1.04925
ADAD1	-0.0961026	-6.29246	-0.273074	0.78607	0.925424	-5.09206	0.935557
ADAD2	-0.576139	-0.580175	-1.0107	0.317669	0.688539	-4.8468	0.670757
ADAL	-0.012606	2.91145	-0.080833	0.93594	0.978611	-5.76	0.9913
ADAM10	-0.0403635	5.90607	-0.469408	0.641089	0.879677	-6.02101	0.97241
ADAM11	0.516628	1.20853	2.31989	0.0250345	0.316902	-3.34567	1.43061
ADAM12	-0.449558	4.796	-0.999703	0.322905	0.692913	-5.61169	0.732267
ADAM15	-0.216039	7.61986	-1.65093	0.105854	0.470641	-4.75162	0.860926
ADAM17	0.00265052	4.50254	0.0312935	0.975177	0.9928	-6.05862	1.00184
ADAM18	0.231923	-6.70509	1.12221	0.267842	0.644678	-4.70913	1.1744
ADAM19	0.331397	3.58089	0.916872	0.364194	0.722729	-5.50948	1.25823
ADAM2	-0.376681	-6.49495	-1.45034	0.154036	0.532592	-4.44216	0.770207
ADAM20	0.263401	-2.19317	1.02189	0.312404	0.682952	-4.77703	1.2003
ADAM21	0.0646297	-2.42621	0.165237	0.869512	0.957922	-5.10783	1.04582
ADAM22	0.673154	3.46623	2.62302	0.0119204	0.28231	-2.87864	1.59455
ADAM23	0.321834	1.32601	0.92484	0.360079	0.719773	-5.10463	1.24992
ADAM28	0.103326	2.32518	0.310501	0.757642	0.913844	-5.5978	1.07425
ADAM29	1.31882	-5.68873	2.33934	0.023908	0.316902	-3.44681	2.49462
ADAM30	0.306808	-6.65109	1.3275	0.191171	0.576917	-4.54936	1.23697
ADAM32	0.367418	0.908237	1.7047	0.0952829	0.453121	-4.25437	1.29004
ADAM33	0.50367	6.88079	1.82902	0.074159	0.419249	-4.51661	1.41782
ADAM7	0.157938	-6.75909	0.820657	0.416253	0.761106	-4.89842	1.11569
ADAM8	0.140117	2.85069	0.453838	0.65217	0.885789	-5.65545	1.10199
ADAM9	0.0268784	6.84772	0.204799	0.838671	0.947025	-6.05928	1.01881
ADAMDEC1	0.298385	-0.265702	0.532516	0.59704	0.858881	-5.13948	1.22977
ADAMTS1	-0.176344	8.49484	-0.666426	0.508608	0.814664	-5.74562	0.884943
ADAMTS10	0.545726	5.8439	2.71158	0.00950694	0.28231	-2.82608	1.45975
ADAMTS12	-0.550246	4.95526	-2.69515	0.00991767	0.28231	-2.8472	0.682904
ADAMTS13	0.228183	2.26195	1.18413	0.242701	0.622532	-5.01316	1.17136
ADAMTS14	-0.0967973	-0.400124	-0.168588	0.866891	0.957312	-5.2195	0.935107
ADAMTS15	-0.489139	6.40564	-1.81539	0.0762641	0.423432	-4.56387	0.71245
ADAMTS16	-0.711205	0.63633	-1.712	0.0939171	0.451416	-4.23014	0.61081
ADAMTS17	0.214266	1.20241	1.06196	0.29403	0.667006	-4.97733	1.16011
ADAMTS18	-1.42699	2.26867	-1.87062	0.0680383	0.408462	-4.13268	0.371906
ADAMTS19	0.164132	-3.93454	0.24859	0.804831	0.933689	-5.09317	1.12049
ADAMTS2	-0.202861	7.07582	-1.15136	0.255785	0.633296	-5.43184	0.868826
ADAMTS20	-0.0565344	-6.52079	-0.18446	0.854497	0.952817	-5.10704	0.961571
ADAMTS3	0.0918212	2.19089	0.395441	0.694423	0.902553	-5.54499	1.06571
ADAMTS4	-1.45136	6.48661	-3.22955	0.0023434	0.274467	-1.57533	0.365677
ADAMTS5	-0.157989	6.85726	-0.629024	0.532576	0.827934	-5.88795	0.896274
ADAMTS6	0.172249	2.13464	0.564896	0.575006	0.847845	-5.4626	1.12681
ADAMTS7	0.132548	4.69824	0.778331	0.440528	0.775245	-5.78993	1.09623
ADAMTS8	0.0616103	0.281447	0.1556	0.877058	0.959859	-5.30014	1.04363
ADAMTS9	-0.997322	5.78458	-2.19846	0.0332047	0.335429	-3.8995	0.500929
ADAMTSL1	0.564866	3.59279	1.44433	0.15571	0.533993	-4.94144	1.47925
ADAMTSL2	0.0868313	1.20874	0.245108	0.807509	0.934548	-5.41667	1.06204
ADAMTSL3	-0.182803	3.18001	-0.894657	0.375824	0.731859	-5.45014	0.880989
ADAMTSL4	-0.0957696	7.29019	-0.471275	0.639766	0.878836	-5.94133	0.935773
ADAMTSL5	0.970196	0.803221	2.47332	0.0173072	0.297693	-3.09227	1.95911
ADAP1	0.00818511	1.62081	0.0385738	0.969404	0.989987	-5.50908	1.00569
ADAP2	-0.341451	3.88875	-1.17531	0.246175	0.625041	-5.31348	0.789247
ADAR	0.0533161	7.85107	0.672683	0.504656	0.812267	-5.79017	1.03765
ADARB1	0.383714	5.77506	1.83332	0.073506	0.417131	-4.55368	1.3047
ADARB2	-0.0656753	-1.79141	-0.13054	0.896732	0.966678	-5.11845	0.955498
ADAT1	-0.127653	3.79371	-1.2714	0.210248	0.593546	-5.18924	0.91532
ADAT2	-0.0492073	3.96084	-0.34041	0.735163	0.903707	-5.92074	0.966467
ADAT3	-0.115481	0.573181	-0.556135	0.580928	0.850826	-5.2256	0.923075
ADCK1	-0.157804	3.15955	-1.02361	0.3116	0.68214	-5.33317	0.896388
ADCK2	0.0128495	4.1238	0.141606	0.888036	0.964131	-5.99435	1.00895
ADCK5	-0.0103636	3.4299	-0.0938381	0.925663	0.975093	-5.86897	0.992842
ADCY1	0.506134	3.41697	1.70107	0.0959679	0.454406	-4.55249	1.42024
ADCY10	0.0275397	-1.19715	0.0857728	0.932035	0.977133	-5.15419	1.01927
ADCY2	1.00161	2.37827	3.15365	0.0028995	0.274467	-1.67197	2.00224
ADCY3	-0.231695	6.80744	-1.18457	0.24253	0.622395	-5.41264	0.851634
ADCY4	-0.0208784	7.06587	-0.134993	0.893232	0.965472	-6.05567	0.985632
ADCY5	-0.0410889	6.5846	-0.144825	0.885508	0.962967	-6.08661	0.971921
ADCY6	-0.0799501	7.31419	-0.581211	0.564056	0.841376	-5.88406	0.94609
ADCY7	0.351665	3.15443	1.38452	0.173162	0.555083	-4.94083	1.27603
ADCY8	1.39797	-4.69725	1.70278	0.0956447	0.454214	-4.19733	2.6353
ADCY9	0.304202	5.30287	2.4723	0.0173504	0.297693	-3.34391	1.23474
ADCYAP1	0.664618	-0.609734	0.75576	0.453809	0.785365	-5.00378	1.58515
ADCYAP1R1	-0.688877	3.56405	-1.68581	0.0988912	0.459784	-4.59874	0.620337
ADD1	0.0497681	8.4581	0.684983	0.496937	0.809159	-5.73656	1.0351
ADD2	0.0151607	1.5581	0.0540167	0.957166	0.985033	-5.49773	1.01056
ADD3	0.0974336	7.13557	0.759202	0.451768	0.783784	-5.78249	1.06987
ADGB	0.52965	-4.55888	0.95449	0.345036	0.708898	-4.81614	1.44358
ADH1A	0.31089	1.00839	0.870958	0.388491	0.740638	-5.10195	1.24047
ADH1B	-0.402471	11.3577	-1.22834	0.22583	0.606252	-5.07128	0.756562
ADH1C	-0.527674	3.43575	-1.00585	0.319973	0.690854	-5.40286	0.693672
ADH4	-0.836877	0.265064	-1.32753	0.19116	0.576917	-4.63962	0.559854
ADH5	0.0302313	7.90928	0.218236	0.828251	0.943479	-5.9793	1.02118
ADH6	0.0691991	-0.56922	0.292053	0.771614	0.919486	-5.18162	1.04913
ADH7	-0.819764	-3.4081	-1.7618	0.08503	0.435868	-4.13544	0.566535
ADHFE1	0.163905	5.11291	0.702189	0.486249	0.803194	-5.87701	1.12032
ADI1	-0.0809155	6.31009	-0.577253	0.566702	0.843417	-5.95095	0.945458
ADIG	0.124983	-6.65109	0.524796	0.602352	0.861579	-5.02815	1.09049
ADIPOQ	-0.871867	9.93997	-1.62564	0.111149	0.479256	-4.64664	0.546439
ADIPOR1	-0.0744822	6.52522	-0.919282	0.362946	0.721477	-5.69369	0.949683
ADIPOR2	-0.283746	7.4136	-1.35585	0.182046	0.566041	-5.17071	0.821455
ADIRF	0.202223	-1.87997	0.732783	0.467565	0.793104	-4.94443	1.15047
ADK	-0.191406	4.58203	-1.43792	0.157512	0.535773	-5.09091	0.875752
ADM	-0.328445	7.94372	-0.973651	0.335537	0.701798	-5.54914	0.796394
ADM2	-0.596256	-1.57317	-1.10512	0.275097	0.649667	-4.72891	0.661468
ADM5	0.342619	2.21477	1.14663	0.257715	0.635816	-5.04318	1.26806
ADNP	0.0940284	6.53173	1.45653	0.152327	0.530744	-5.09396	1.06735
ADNP2	-0.0968907	5.15544	-0.904017	0.370895	0.727168	-5.72382	0.935046
ADO	-0.149056	4.10543	-1.38932	0.171707	0.553295	-5.09425	0.90184
ADORA1	-0.319629	2.43876	-0.893549	0.376411	0.731943	-5.30741	0.801276
ADORA2A	0.262918	1.54361	1.06493	0.292702	0.665719	-5.01934	1.1999
ADORA2B	-0.0186111	-0.149285	-0.0525355	0.958339	0.985646	-5.25646	0.987183
ADORA3	-0.139431	2.67146	-0.368867	0.713991	0.903707	-5.65011	0.907877
ADPGK	-0.215708	5.82106	-2.49778	0.0162979	0.294979	-3.29358	0.861123
ADPRH	-0.0311865	4.63084	-0.269208	0.789025	0.926537	-6.03934	0.978615
ADPRHL1	-0.0317578	1.37814	-0.176408	0.860781	0.955436	-5.45581	0.978228
ADPRHL2	-0.098643	4.59545	-1.58523	0.120056	0.491444	-4.88773	0.933911
ADPRM	0.10709	3.41589	0.933735	0.355522	0.716447	-5.46353	1.07705
ADRA1A	-0.000890468	2.0202	-0.00177728	0.99859	0.999719	-5.58167	0.999383
ADRA1B	0.0159056	1.58553	0.0545925	0.95671	0.984977	-5.50238	1.01109
ADRA1D	0.0261853	0.883204	0.0754019	0.940236	0.979815	-5.38978	1.01832
ADRA2A	-0.442994	7.41391	-1.47245	0.147996	0.52541	-5.01875	0.735606
ADRA2B	0.81325	3.35593	2.59818	0.0126919	0.284102	-2.92039	1.75717
ADRA2C	0.489815	4.2764	1.33232	0.189595	0.575696	-5.1897	1.40427
ADRB1	-0.537104	1.95282	-1.1998	0.23662	0.617708	-4.94946	0.689153
ADRB2	-0.786516	5.20099	-2.70879	0.00957558	0.28231	-2.82646	0.579742
ADRB3	-1.6237	-2.72478	-2.20495	0.0327144	0.334119	-3.61792	0.324502
ADRM1	-0.177685	5.95457	-1.71446	0.0934616	0.450803	-4.74196	0.88412
ADSL	-0.126784	5.23008	-1.52353	0.134762	0.50955	-5.02094	0.915871
ADSS	-0.0586013	5.32081	-0.750999	0.45664	0.786939	-5.85237	0.960195
ADSSL1	0.469996	3.18968	1.8129	0.0766534	0.423538	-4.3455	1.38511
ADTRP	0.0275368	-0.547214	0.0877847	0.930445	0.976663	-5.21193	1.01927
AEBP1	0.609841	9.1295	2.406	0.0203839	0.308477	-3.33983	1.52609
AEBP2	0.159581	4.9453	1.41321	0.164609	0.543547	-5.15538	1.11696
AEN	-0.152646	3.49778	-0.893897	0.376227	0.731909	-5.51292	0.899599
AES	0.108757	7.89695	1.0418	0.303181	0.673899	-5.48806	1.0783
AF241726.2	-0.0125937	-6.68795	-0.0496142	0.960654	0.986876	-5.11867	0.991309
AFAP1	0.0456411	5.99027	0.359854	0.720673	0.903707	-6.06279	1.03214
AFAP1L1	0.061311	6.54836	0.347991	0.729501	0.903707	-6.04026	1.04341
AFAP1L2	0.468744	4.20014	2.04734	0.0466072	0.363251	-4.09334	1.3839
AFF1	0.213321	7.82151	1.33586	0.188446	0.574012	-5.16829	1.15935
AFF2	0.310871	2.24648	0.896462	0.374871	0.731113	-5.27037	1.24046
AFF3	0.552628	4.06596	2.17893	0.0347197	0.338218	-3.83607	1.46676
AFF4	0.0862854	7.05803	1.0084	0.318762	0.689928	-5.57847	1.06163
AFG3L2	-0.23076	5.22173	-1.7707	0.0835182	0.433097	-4.64808	0.852186
AFM	0.450525	-6.41703	1.25301	0.216802	0.598869	-4.60936	1.36654
AFMID	-0.0526702	3.63136	-0.448566	0.655939	0.887953	-5.81877	0.96415
AFP	0.598279	-6.1347	1.54103	0.130451	0.504234	-4.35762	1.51391
AFTPH	0.0670816	5.28017	0.825857	0.413328	0.759171	-5.79422	1.0476
AGA	0.126232	3.62063	1.33417	0.188993	0.574894	-5.0849	1.09144
AGAP1	-0.0531092	5.51912	-0.536333	0.594422	0.857813	-5.99048	0.963857
AGAP2	0.222534	1.89619	0.751928	0.456087	0.786579	-5.31343	1.16678
AGAP3	0.0637021	6.47598	0.733869	0.46691	0.792593	-5.84308	1.04514
AGAP4	-0.526787	0.742001	-1.14257	0.259379	0.637304	-4.85465	0.694099
AGAP5	-0.0227994	2.10022	-0.175199	0.861725	0.955641	-5.58329	0.984321
AGAP6	-0.175235	4.40555	-1.49077	0.143136	0.518588	-4.99995	0.885624
AGAP9	-0.0648605	-1.2183	-0.243185	0.808989	0.935395	-5.13482	0.956038
AGBL1	-0.25264	-6.34216	-0.637038	0.527391	0.824779	-4.98346	0.839359
AGBL2	0.50391	-0.999494	1.62893	0.110446	0.477891	-4.27853	1.41805
AGBL3	0.0678642	0.649212	0.408579	0.684824	0.89974	-5.29197	1.04816
AGBL4	0.0839803	-1.49422	0.279095	0.781476	0.923599	-5.11084	1.05994
AGBL5	0.169575	4.54872	1.99689	0.0520281	0.373722	-4.22031	1.12473
AGER	0.234805	2.23356	1.38786	0.172149	0.553567	-4.78453	1.17675
AGFG1	-0.406883	7.26375	-2.15352	0.0367811	0.342541	-3.92423	0.754251
AGFG2	0.134012	4.87345	1.16219	0.251406	0.62988	-5.45236	1.09734
AGGF1	-0.127909	4.89117	-1.40483	0.167074	0.547013	-5.16251	0.915157
AGK	-0.0430718	4.63388	-0.575488	0.567885	0.844094	-5.91485	0.970586
AGL	0.163536	5.34329	1.37559	0.175891	0.558185	-5.22397	1.12003
AGMAT	-0.802961	-2.0027	-2.19593	0.0333981	0.335816	-3.62716	0.573171
AGMO	-0.424197	1.77106	-1.58167	0.120867	0.4924	-4.4858	0.745253
AGPAT1	0.0420559	6.11745	0.573832	0.568995	0.844306	-5.96157	1.02958
AGPAT2	-0.795626	8.82034	-2.01201	0.0503489	0.368916	-4.09345	0.576093
AGPAT3	-0.197069	6.31856	-1.34648	0.185024	0.569401	-5.24813	0.872321
AGPAT4	0.343239	4.39116	1.67227	0.101549	0.463338	-4.73656	1.2686
AGPAT5	-0.136446	3.82372	-0.910629	0.367438	0.725138	-5.55929	0.909758
AGPS	-0.140461	5.60629	-1.58262	0.120651	0.492178	-4.94453	0.907229
AGR2	0.142544	-3.96925	0.234901	0.815372	0.937218	-5.09526	1.10385
AGR3	-0.62612	-5.86608	-1.44057	0.156763	0.534575	-4.4499	0.647916
AGRN	0.441189	5.69986	2.03824	0.0475467	0.365772	-4.19914	1.35772
AGRP	-0.711578	-5.66376	-1.44714	0.154924	0.533312	-4.4438	0.610652
AGT	0.260504	2.80055	0.800094	0.427943	0.768458	-5.44762	1.1979
AGTPBP1	-0.0320655	4.78323	-0.410891	0.683141	0.89887	-6.00835	0.978019
AGTR1	-0.109353	6.57921	-0.435996	0.664965	0.891426	-6.00497	0.927004
AGTR2	0.342558	-6.3006	0.904921	0.370422	0.72694	-4.84893	1.268
AGTRAP	-0.0592112	5.12767	-0.42944	0.669693	0.893695	-6.0269	0.959789
AGXT	-0.983196	-1.88295	-1.70922	0.0944346	0.452041	-4.19041	0.505858
AGXT2	-0.367325	-6.32106	-1.0302	0.308532	0.679029	-4.77099	0.775219
AHCTF1	0.0340298	6.42644	0.223995	0.823795	0.941039	-6.08177	1.02387
AHCY	-0.0669238	5.84126	-0.478323	0.634782	0.877173	-6.01812	0.954671
AHCYL1	-0.176864	7.43566	-1.47175	0.148184	0.525537	-5.01828	0.884624
AHCYL2	0.096587	4.79306	1.30131	0.199905	0.584837	-5.28484	1.06924
AHDC1	0.560867	5.75559	3.1218	0.00316807	0.274467	-1.85797	1.47516
AHI1	-0.0464729	4.45863	-0.320833	0.749851	0.911295	-6.00378	0.968301
AHNAK	0.217608	11.6322	1.78971	0.0803644	0.430246	-4.32172	1.1628
AHNAK2	0.91705	6.47985	2.93679	0.00525269	0.27548	-2.29002	1.88825
AHR	-0.0307877	6.61282	-0.247495	0.805673	0.934037	-6.06528	0.978886
AHRR	-0.127319	0.958065	-0.373212	0.710778	0.903707	-5.34623	0.915531
AHSA1	-0.126863	5.89284	-0.996939	0.32423	0.69374	-5.64954	0.915821
AHSG	-0.654593	-5.40196	-1.40928	0.16576	0.545486	-4.47713	0.635255
AHSP	-1.97362	-4.71126	-3.78809	0.000455992	0.235149	-1.22824	0.254614
AICDA	0.190735	-1.673	0.523911	0.602962	0.862182	-5.03668	1.14135
AIDA	-0.0673075	5.6661	-0.611855	0.543774	0.833352	-5.94938	0.954418
AIF1	-0.336124	3.95825	-0.960692	0.341942	0.706894	-5.53846	0.792167
AIF1L	-0.619964	6.56236	-2.64756	0.011201	0.28231	-2.94836	0.650687
AIFM1	-0.235855	5.06341	-2.08954	0.0424567	0.355912	-4.09085	0.849182
AIFM2	-0.573318	7.04769	-2.17634	0.0349249	0.338218	-3.89276	0.672069
AIFM3	0.0678462	-0.140686	0.205661	0.838001	0.946807	-5.2426	1.04815
AIG1	0.0865738	4.98453	0.766257	0.447603	0.780473	-5.8235	1.06185
AIM2	0.665837	-1.33714	2.31619	0.0252543	0.317631	-3.45008	1.58649
AIMP1	-0.058895	5.46545	-0.771394	0.444585	0.778117	-5.84126	0.959999
AIMP2	-0.313024	3.37762	-1.96141	0.0561599	0.381791	-4.13165	0.804953
AIP	0.076934	5.5756	0.784469	0.436956	0.773664	-5.83289	1.05477
AIPL1	-0.520688	-5.80277	-1.30963	0.1971	0.582046	-4.56211	0.697039
AIRE	-0.198196	-2.52358	-0.379861	0.705871	0.903707	-5.069	0.87164
AJAP1	0.0518177	1.09322	0.180191	0.857828	0.953962	-5.41026	1.03657
AJUBA	0.258284	3.61194	1.36118	0.180367	0.564137	-5.05031	1.19606
AK1	-0.0314472	5.51003	-0.339528	0.735823	0.903829	-6.074	0.978438
AK2	-0.520705	6.74949	-3.37988	0.00152613	0.274467	-1.18571	0.697031
AK3	-0.0137225	6.65921	-0.13225	0.895388	0.966085	-6.08357	0.990533
AK4	-0.336008	5.91751	-1.37824	0.175079	0.55682	-5.22216	0.79223
AK5	0.836175	-0.285933	1.71122	0.0940628	0.451561	-4.19925	1.78531
AK7	-0.0656383	0.469658	-0.330469	0.74261	0.907254	-5.2911	0.955522
AK8	0.304989	0.374784	1.63561	0.109035	0.475251	-4.31122	1.23541
AK9	0.159822	2.79226	1.2542	0.216374	0.598869	-5.02905	1.11715
AKAP1	0.0228542	6.72526	0.147582	0.883345	0.962399	-6.07724	1.01597
AKAP10	-0.0285352	5.19116	-0.556287	0.580825	0.850823	-5.9696	0.980415
AKAP11	0.0603273	6.23766	0.626659	0.534112	0.828817	-5.92568	1.0427
AKAP12	-0.234852	8.45128	-0.733453	0.467161	0.792753	-5.70461	0.849772
AKAP13	0.244052	7.47101	2.1571	0.036484	0.342151	-3.90631	1.18431
AKAP14	-0.506452	-5.71939	-1.13205	0.263729	0.640469	-4.69871	0.703951
AKAP17A	0.0556475	-6.83281	0.340064	0.735422	0.903707	-5.08201	1.03933
AKAP2	-0.382375	8.49997	-2.69602	0.0098955	0.28231	-2.75876	0.767174
AKAP3	0.15345	-0.671428	0.678964	0.500707	0.810845	-5.03783	1.11223
AKAP4	-1.1194	-5.53111	-2.09705	0.0417533	0.354808	-3.75395	0.460286
AKAP5	0.16125	0.71415	0.69987	0.487682	0.803871	-5.17202	1.11826
AKAP6	1.20025	2.45646	2.78374	0.00788275	0.27548	-2.47626	2.2978
AKAP7	-0.29152	3.59392	-2.33096	0.0243877	0.316902	-3.48729	0.817041
AKAP8	0.00758241	5.84519	0.0860586	0.931809	0.977133	-6.1257	1.00527
AKAP8L	0.122603	6.07235	1.31008	0.196948	0.581799	-5.30335	1.0887
AKAP9	0.102536	6.40944	0.841758	0.404462	0.751361	-5.7653	1.07366
AKIP1	0.11289	3.64716	1.08525	0.283705	0.658229	-5.3656	1.08139
AKIRIN1	-0.129121	5.6496	-0.799798	0.428113	0.768536	-5.8215	0.914389
AKIRIN2	-0.174078	5.23071	-1.61588	0.113249	0.48167	-4.88755	0.886334
AKNA	-0.11936	6.34033	-0.861951	0.393375	0.743587	-5.75252	0.920596
AKNAD1	0.882255	-1.31435	3.21148	0.0024658	0.274467	-2.08884	1.84325
AKR1A1	-0.18841	5.98411	-1.86122	0.0693831	0.411252	-4.50352	0.877572
AKR1B1	0.0101497	6.20199	0.0738579	0.941457	0.980303	-6.11503	1.00706
AKR1B10	0.517326	-1.57707	0.869318	0.389377	0.741572	-4.88102	1.4313
AKR1B15	0.418835	-1.52617	0.798666	0.428762	0.769342	-4.922	1.33685
AKR1C1	-0.222921	7.38478	-0.727411	0.470816	0.795189	-5.78755	0.856829
AKR1C2	-0.318779	8.06032	-0.850578	0.399596	0.74687	-5.64631	0.801748
AKR1C3	-0.36406	6.84632	-1.23974	0.221623	0.602988	-5.34751	0.776975
AKR1C4	0.267091	-4.38734	0.596518	0.553878	0.838391	-4.99585	1.20338
AKR1D1	-0.103626	-5.90904	-0.233491	0.81646	0.937576	-5.09634	0.930691
AKR1E2	0.028078	1.83904	0.190491	0.849798	0.950801	-5.53246	1.01965
AKR7A2	-0.189275	5.06269	-1.56555	0.124599	0.496335	-4.95314	0.877047
AKR7A3	0.39293	0.564911	1.48696	0.144135	0.520389	-4.49377	1.31306
AKT1	-0.244702	6.84639	-1.78922	0.080444	0.430246	-4.58332	0.84399
AKT1S1	-0.133849	5.89909	-1.41016	0.165504	0.545028	-5.18108	0.911397
AKT2	-0.163904	7.59248	-1.20291	0.235426	0.616689	-5.34037	0.892606
AKT3	0.340486	6.1964	2.25085	0.0294273	0.326096	-3.7885	1.26618
AKTIP	0.0713174	5.27433	0.675257	0.503036	0.811647	-5.90268	1.05068
AL035460.1	0.247353	-6.6938	1.1407	0.26015	0.637891	-4.69572	1.18703
AL121594.1	0.0556475	-6.83281	0.340064	0.735422	0.903707	-5.08201	1.03933
AL121753.1	0.202575	-6.59451	0.832146	0.409807	0.755696	-4.89138	1.15075
AL139300.1	0.0556475	-6.83281	0.340064	0.735422	0.903707	-5.08201	1.03933
AL160269.1	0.363604	-6.61165	1.48042	0.145866	0.522095	-4.41493	1.28664
AL357673.1	0.251874	2.27218	1.75953	0.085419	0.436639	-4.29918	1.19075
AL359922.1	0.0556475	-6.83281	0.340064	0.735422	0.903707	-5.08201	1.03933
AL391650.1	0.0556475	-6.83281	0.340064	0.735422	0.903707	-5.08201	1.03933
AL512428.1	-0.0476621	-4.22903	-0.122169	0.90332	0.967842	-5.1079	0.967503
AL590560.1	0.189709	-4.15466	0.35051	0.727624	0.903707	-5.07254	1.14053
AL645922.1	0.10702	-6.79595	0.581157	0.564091	0.841376	-5.00849	1.077
AL713999.1	-0.0590185	-6.39049	-0.211181	0.833718	0.945528	-5.10267	0.959917
ALAD	0.00660223	6.05052	0.0542336	0.956994	0.985033	-6.12235	1.00459
ALAS1	-0.408021	5.78273	-2.76354	0.00830956	0.27548	-2.70908	0.753657
ALAS2	-2.04597	-1.61878	-3.21673	0.00242967	0.274467	-2.12126	0.242159
ALB	-0.103532	-0.240065	-0.191735	0.848829	0.950475	-5.23362	0.930752
ALCAM	0.621553	4.55699	1.98126	0.053815	0.376171	-4.2486	1.53853
ALDH16A1	-0.242568	5.75015	-1.88401	0.0661624	0.405754	-4.46902	0.84524
ALDH18A1	-0.114558	4.63476	-0.756629	0.453293	0.784867	-5.79921	0.923665
ALDH1A1	0.692042	6.06192	3.06984	0.00365728	0.27548	-1.98157	1.61557
ALDH1A2	0.404958	3.94296	1.55953	0.126014	0.497862	-4.84131	1.32405
ALDH1A3	-0.264823	4.05907	-0.797718	0.429306	0.769622	-5.69011	0.832301
ALDH1B1	0.379056	4.83727	1.33499	0.188725	0.574368	-5.24725	1.30049
ALDH1L1	-0.795452	6.35868	-1.73913	0.0889837	0.443948	-4.68872	0.576162
ALDH1L2	0.408789	4.50606	2.09132	0.0422892	0.355912	-4.04642	1.32757
ALDH2	-0.296057	9.00186	-0.985764	0.329623	0.696912	-5.46123	0.814475
ALDH3A1	0.489088	0.165125	1.51585	0.136689	0.511828	-4.43756	1.40356
ALDH3A2	0.0465575	6.7149	0.316595	0.753044	0.912206	-6.03988	1.0328
ALDH3B1	-0.0215679	4.49858	-0.122626	0.90296	0.967664	-6.05132	0.985161
ALDH3B2	0.341252	-2.8597	0.513368	0.610255	0.866181	-5.02933	1.26686
ALDH4A1	-0.474887	6.17034	-1.14902	0.256738	0.634732	-5.48595	0.719523
ALDH5A1	0.0394466	4.16901	0.165882	0.869007	0.957857	-5.99803	1.02772
ALDH6A1	-0.249436	5.81843	-0.953902	0.34533	0.708903	-5.69081	0.841225
ALDH7A1	-0.0742937	5.46439	-0.680403	0.499804	0.810463	-5.90485	0.949807
ALDH8A1	0.246361	-0.158211	0.790606	0.433402	0.771912	-5.0241	1.18621
ALDH9A1	-0.297327	6.74223	-2.21063	0.0322911	0.332355	-3.84299	0.813759
ALDOA	-0.0458044	9.64645	-0.380843	0.705147	0.903707	-5.80175	0.96875
ALDOB	-0.187713	-1.08029	-0.570435	0.571276	0.84548	-5.05323	0.877996
ALDOC	0.0502723	5.65998	0.136474	0.892067	0.965338	-6.12204	1.03546
ALG1	-0.219041	3.33721	-1.89255	0.0649894	0.404061	-4.24009	0.859136
ALG10	-0.0562141	0.758939	-0.447694	0.656564	0.888028	-5.29343	0.961785
ALG10B	0.0836847	1.19395	0.646761	0.521137	0.821796	-5.26599	1.05972
ALG11	-0.135311	2.10789	-1.4234	0.161653	0.538956	-4.7243	0.910474
ALG12	-0.0129222	3.56626	-0.163232	0.871081	0.958441	-5.88835	0.991083
ALG13	-0.0207449	5.33677	-0.253002	0.801442	0.932393	-6.09475	0.985724
ALG14	-0.320403	3.25875	-1.85352	0.0705006	0.412726	-4.29156	0.800846
ALG1L	0.759052	-2.76548	1.75373	0.0864205	0.43833	-4.14389	1.69238
ALG1L2	0.407515	-3.2246	1.03034	0.308465	0.678965	-4.77002	1.3264
ALG2	-0.17628	4.38868	-1.72999	0.0906209	0.446442	-4.64754	0.884982
ALG3	-0.28756	4.78935	-2.11998	0.0396669	0.350618	-4.01744	0.819287
ALG5	-0.177804	4.65031	-1.78224	0.0815909	0.431628	-4.59199	0.884048
ALG6	-0.00947562	3.42937	-0.104797	0.917012	0.97283	-5.86783	0.993454
ALG8	-0.274267	4.54683	-2.31933	0.0250675	0.316902	-3.61419	0.82687
ALG9	-0.170528	5.47568	-1.56614	0.12446	0.496322	-4.9672	0.888517
ALK	-0.631676	-0.755364	-1.55349	0.127449	0.501123	-4.36214	0.645426
ALKBH1	-0.0614559	3.5551	-0.766949	0.447196	0.780439	-5.62208	0.958297
ALKBH2	-0.195034	3.71879	-1.5419	0.13024	0.504234	-4.83094	0.873552
ALKBH3	-0.0967918	4.20864	-1.03177	0.307802	0.678238	-5.51135	0.93511
ALKBH4	0.0621386	2.76088	0.685819	0.496415	0.80894	-5.51656	1.04401
ALKBH5	0.0735211	6.32638	0.728608	0.470091	0.794843	-5.85491	1.05228
ALKBH6	0.0620206	3.01942	0.574371	0.568633	0.844094	-5.63365	1.04393
ALKBH7	-0.088964	5.03104	-0.816808	0.418427	0.762974	-5.78837	0.940198
ALKBH8	0.0807899	3.37408	0.86804	0.390069	0.742076	-5.51004	1.0576
ALLC	0.709927	-3.8273	1.23227	0.224375	0.605773	-4.62393	1.63572
ALMS1	0.160761	4.7674	1.94806	0.0577856	0.386364	-4.32478	1.11788
ALOX12	0.168927	0.491985	1.22286	0.227875	0.608066	-4.75787	1.12422
ALOX12B	0.301193	-4.26079	0.632332	0.530433	0.826633	-4.98171	1.23216
ALOX15	-0.210918	-4.28171	-0.398166	0.692428	0.9022	-5.06057	0.863987
ALOX15B	0.75286	1.53986	1.12185	0.267995	0.644796	-4.96732	1.68513
ALOX5	-0.11257	4.53978	-0.430295	0.669076	0.893634	-5.97421	0.924939
ALOX5AP	-0.362575	3.88218	-1.5166	0.136499	0.511828	-4.89184	0.777775
ALOXE3	0.632734	-3.72643	1.51358	0.137263	0.511828	-4.3832	1.5505
ALPI	-0.261119	-6.29936	-0.697177	0.489349	0.804447	-4.95699	0.834441
ALPK1	0.117289	4.91554	0.825305	0.413638	0.759197	-5.77344	1.08469
ALPK2	0.566948	0.167013	1.02538	0.31077	0.681742	-4.89602	1.48139
ALPK3	-0.51192	5.71565	-1.4738	0.147634	0.524908	-5.09822	0.701288
ALPL	-0.527562	4.58003	-1.19124	0.239926	0.620353	-5.39235	0.693726
ALPP	-0.197345	-6.38179	-0.594341	0.555319	0.838755	-5.00093	0.872154
ALS2	0.0683548	5.09575	1.17132	0.247757	0.626497	-5.45741	1.04852
ALS2CL	0.318982	5.55579	1.6167	0.113072	0.481144	-4.89414	1.24745
ALS2CR12	-0.211614	-0.177725	-0.943908	0.350356	0.712758	-4.92481	0.86357
ALX1	1.2188	-3.88377	2.04239	0.0471166	0.364273	-3.8193	2.32753
ALX3	0.267143	-6.28508	0.885564	0.380653	0.735478	-4.86005	1.20342
ALX4	-0.193242	0.150183	-0.579546	0.565168	0.842072	-5.16446	0.874638
ALYREF	-0.390656	4.67964	-3.81311	0.000422657	0.235149	-0.0321392	0.762783
AMACR	-0.0829169	3.30242	-0.581175	0.564079	0.841376	-5.68847	0.944147
AMBN	0.134656	-6.57996	0.490214	0.626411	0.872834	-5.03926	1.09783
AMBP	0.00182498	-3.88987	0.00324683	0.997424	0.999719	-5.11366	1.00127
AMBRA1	0.113738	5.15996	1.49079	0.143131	0.518588	-5.06349	1.08203
AMD1	-0.200165	5.69525	-1.28591	0.205182	0.589732	-5.34017	0.870451
AMDHD1	-0.466469	-0.456486	-1.91954	0.0613957	0.395163	-3.94383	0.723734
AMDHD2	0.208061	4.17663	1.43384	0.158666	0.536129	-5.04666	1.15513
AMELX	0.192105	-6.33908	0.589263	0.55869	0.839902	-5.00263	1.14243
AMELY	0.10702	-6.79595	0.58515	0.561427	0.840936	-5.00696	1.077
AMER1	0.256914	2.76414	1.86036	0.069507	0.411252	-4.2095	1.19492
AMER2	-1.03662	-3.25846	-1.75016	0.0870424	0.439928	-4.14774	0.487467
AMER3	0.264947	-5.1958	0.605245	0.548117	0.835082	-4.99213	1.20159
AMFR	0.114476	6.40596	1.37802	0.175144	0.556834	-5.20377	1.08258
AMH	0.070613	-1.64521	0.140596	0.888829	0.96423	-5.12284	1.05016
AMHR2	0.120351	-2.84086	0.346244	0.730805	0.903707	-5.07663	1.087
AMIGO1	-0.0269318	3.42943	-0.127807	0.898882	0.966824	-5.86532	0.981505
AMIGO2	0.230631	4.47857	1.00355	0.321068	0.691484	-5.57462	1.17335
AMIGO3	0.0556475	-6.83281	0.340064	0.735422	0.903707	-5.08201	1.03933
AMMECR1	0.0883509	3.13787	0.861346	0.393704	0.743587	-5.46852	1.06315
AMMECR1L	-0.119402	5.51096	-1.35344	0.182806	0.566817	-5.25584	0.920569
AMN	-1.2543	-1.22948	-2.94386	0.0051536	0.27548	-2.51192	0.419197
AMN1	0.160944	1.84549	1.308	0.197647	0.582434	-4.82049	1.11802
AMOT	0.679727	3.75512	3.38279	0.00151339	0.274467	-1.13081	1.60184
AMOTL1	-0.135242	6.44278	-1.44511	0.155492	0.533966	-5.11393	0.910517
AMOTL2	0.0681013	8.02526	0.383415	0.703253	0.903707	-5.92282	1.04834
AMPD1	-0.152827	-2.84537	-0.220761	0.826297	0.942344	-5.10011	0.899486
AMPD2	-0.0420191	4.63979	-0.25196	0.802242	0.932393	-6.04469	0.971295
AMPD3	-0.137481	3.76776	-0.556268	0.580838	0.850823	-5.79364	0.909105
AMPH	0.172907	3.53734	0.516886	0.607817	0.865262	-5.76902	1.12733
AMT	0.45188	4.61574	2.45659	0.0180295	0.298859	-3.34055	1.36782
AMTN	0.309467	-6.65109	1.07822	0.286793	0.660912	-4.7399	1.23925
AMY1A	-0.0541462	-6.64851	-0.239562	0.811779	0.936296	-5.10016	0.963164
AMY1B	-0.301179	-3.88646	-0.732534	0.467716	0.793195	-4.938	0.811589
AMY1C	0.221365	-6.44966	0.831743	0.410032	0.755881	-4.89086	1.16584
AMY2A	-0.321541	-2.08232	-0.425284	0.672696	0.89442	-5.05882	0.800215
AMY2B	0.278284	5.20489	1.58224	0.120736	0.492198	-4.93585	1.21275
AMZ1	0.574247	-1.90187	1.44198	0.156368	0.534523	-4.45055	1.4889
AMZ2	-0.0319548	5.72793	-0.349531	0.728354	0.903707	-6.07142	0.978094
ANAPC1	-0.0570771	4.39489	-0.950089	0.347242	0.710956	-5.61335	0.96121
ANAPC10	-0.125371	3.00631	-1.345	0.185496	0.569684	-4.96254	0.916768
ANAPC11	-0.248643	5.34813	-2.45295	0.0181902	0.299084	-3.38554	0.841688
ANAPC13	-0.0675261	5.48627	-0.563784	0.575755	0.84854	-5.97536	0.954273
ANAPC15	-0.172239	2.7294	-1.30173	0.199763	0.584837	-4.96448	0.887464
ANAPC16	-0.0730448	6.61896	-0.685197	0.496803	0.80914	-5.86779	0.95063
ANAPC2	0.0425521	5.8337	0.496443	0.622046	0.871093	-6.00969	1.02993
ANAPC4	0.0813038	5.0325	1.0216	0.312541	0.683169	-5.6089	1.05797
ANAPC5	-0.0565242	7.08063	-0.803054	0.426248	0.767748	-5.75357	0.961578
ANAPC7	-0.148951	5.34044	-2.2933	0.0266519	0.320243	-3.71092	0.901906
ANG	-0.077653	3.4954	-0.410948	0.683099	0.89887	-5.80688	0.947598
ANGEL1	0.0163313	4.76184	0.123021	0.902649	0.967664	-6.08076	1.01138
ANGEL2	-0.0535533	5.19952	-0.504303	0.616558	0.869208	-5.99669	0.96356
ANGPT1	-0.0811714	5.14998	-0.405809	0.686844	0.900273	-6.03769	0.94529
ANGPT2	-0.0100305	4.93108	-0.0327541	0.974018	0.99232	-6.10267	0.993071
ANGPT4	0.0836514	2.06998	0.235155	0.815176	0.937218	-5.56669	1.0597
ANGPTL1	0.0978912	5.60922	0.301362	0.764554	0.916624	-6.08671	1.07021
ANGPTL2	-0.112704	8.10379	-0.485793	0.629517	0.874815	-5.87429	0.924853
ANGPTL3	0.574208	-3.95934	1.02634	0.310323	0.681274	-4.77138	1.48886
ANGPTL4	-0.990254	8.00949	-2.77883	0.00798475	0.27548	-2.59501	0.503389
ANGPTL5	0.323584	1.89987	0.969831	0.337417	0.70415	-5.15324	1.25144
ANGPTL6	0.14206	-1.75847	0.392024	0.696927	0.903707	-5.07395	1.10348
ANGPTL7	0.952719	1.06414	1.31788	0.194344	0.579705	-4.71839	1.93552
ANHX	0.321461	-6.37594	1.05478	0.297268	0.66962	-4.7548	1.2496
ANK1	0.149747	1.09028	0.446806	0.6572	0.888028	-5.34087	1.10938
ANK2	0.377186	6.14274	1.44631	0.155156	0.533312	-5.12588	1.29881
ANK3	0.46218	2.81952	2.09349	0.0420857	0.355748	-3.83119	1.37762
ANKAR	0.359151	2.33117	2.86374	0.00638489	0.27548	-2.30673	1.28267
ANKDD1A	0.343735	4.69438	1.65411	0.105203	0.470024	-4.79547	1.26904
ANKDD1B	0.0389359	-0.622872	0.155273	0.877314	0.959931	-5.19849	1.02736
ANKEF1	-0.389014	2.18021	-1.43081	0.159529	0.536489	-4.72554	0.763651
ANKFN1	0.988263	-0.866656	2.70511	0.00966673	0.28231	-2.84556	1.9838
ANKFY1	0.121358	6.06482	2.09091	0.0423274	0.355912	-4.09669	1.08776
ANKH	0.211337	5.94814	1.91096	0.0625197	0.399	-4.42011	1.15776
ANKHD1	0.0963762	7.10808	1.43484	0.158383	0.536129	-5.0886	1.06908
ANKIB1	0.0506207	5.76335	0.720583	0.474966	0.797248	-5.87889	1.03571
ANKK1	0.113224	-1.12376	0.362552	0.71867	0.903707	-5.11694	1.08164
ANKLE1	0.170223	0.29402	0.804923	0.42518	0.767428	-5.06126	1.12523
ANKLE2	-0.117421	6.56193	-1.57199	0.123097	0.495566	-4.93119	0.921834
ANKMY1	0.0915321	3.80956	1.02049	0.313057	0.683646	-5.45777	1.0655
ANKMY2	0.129629	4.56778	1.16694	0.249502	0.627976	-5.41787	1.09401
ANKRA2	0.167751	3.97113	1.51773	0.136214	0.51162	-4.90386	1.12331
ANKRD1	0.921356	-0.316312	1.68351	0.099339	0.460209	-4.23073	1.89389
ANKRD10	0.118228	6.98885	1.12524	0.266571	0.642934	-5.46549	1.0854
ANKRD11	0.0368323	6.89409	0.515622	0.608693	0.865574	-5.94795	1.02586
ANKRD12	0.178394	6.46574	1.65793	0.104425	0.468146	-4.80908	1.13162
ANKRD13A	0.134303	5.65004	1.35101	0.18358	0.567194	-5.25978	1.09756
ANKRD13B	0.259121	3.86737	1.65976	0.104053	0.467614	-4.68475	1.19675
ANKRD13C	-0.0304924	4.79907	-0.416709	0.678912	0.896992	-6.00753	0.979086
ANKRD13D	0.194802	5.06171	1.56374	0.125024	0.496513	-4.95568	1.14457
ANKRD16	0.0784012	2.42731	0.800594	0.427656	0.768379	-5.37501	1.05585
ANKRD17	0.0407671	6.77161	0.594343	0.555318	0.838755	-5.91403	1.02866
ANKRD18A	0.484952	-4.37308	0.871823	0.388024	0.74024	-4.86486	1.39954
ANKRD18B	0.284741	-5.81576	0.663752	0.510302	0.815242	-4.9694	1.21819
ANKRD2	0.0303468	-1.88723	0.0549605	0.956418	0.984977	-5.12063	1.02126
ANKRD20A1	-0.712503	-3.60895	-1.362	0.180111	0.563968	-4.51855	0.610261
ANKRD20A2	0.143717	-4.64125	0.252596	0.801754	0.932393	-5.09115	1.10475
ANKRD20A3	-0.226823	-3.82883	-0.457764	0.649368	0.884272	-5.04488	0.854515
ANKRD20A4	0.537291	-2.84936	0.866555	0.390873	0.742294	-4.8705	1.45124
ANKRD20A8P	-2.41211	-4.94289	-3.48995	0.00110851	0.274467	-1.72522	0.187881
ANKRD22	-0.289166	-3.58443	-0.493605	0.624033	0.871541	-5.03434	0.818375
ANKRD23	0.379025	-0.854039	1.51971	0.135717	0.510726	-4.39412	1.30046
ANKRD24	0.0971622	1.30982	0.359158	0.72119	0.903707	-5.40372	1.06967
ANKRD26	0.10122	3.57308	1.09481	0.279538	0.65366	-5.34247	1.07268
ANKRD27	0.108348	5.06384	1.26937	0.210964	0.594483	-5.34306	1.07799
ANKRD28	0.0793904	6.29181	0.761416	0.450459	0.782514	-5.83311	1.05657
ANKRD29	0.0738972	4.72782	0.373329	0.710691	0.903707	-6.01725	1.05256
ANKRD30A	-0.836703	-0.94806	-1.3932	0.170538	0.551777	-4.51358	0.559922
ANKRD30B	0.680956	-3.38465	1.009	0.318478	0.689639	-4.7837	1.6032
ANKRD30BL	0.0581773	-6.20007	0.156579	0.876291	0.9595	-5.10796	1.04115
ANKRD31	0.206774	-1.61954	0.720951	0.474742	0.797248	-4.95727	1.1541
ANKRD33	0.352532	-4.03109	0.638733	0.526298	0.824197	-4.97952	1.2768
ANKRD33B	0.620561	-0.526135	1.75837	0.085619	0.437106	-4.1402	1.53747
ANKRD34A	0.348338	0.943726	1.76269	0.0848784	0.435706	-4.18053	1.27309
ANKRD34B	-0.432286	-5.1346	-0.710153	0.481346	0.800919	-4.94721	0.741086
ANKRD34C	1.48201	-2.823	2.13827	0.0380696	0.346981	-3.70146	2.79338
ANKRD35	0.407978	3.14471	2.05348	0.0459816	0.362687	-3.94162	1.32682
ANKRD36	0.369772	3.2662	2.42967	0.0192495	0.303403	-3.25532	1.29215
ANKRD36B	0.30443	1.71438	1.5496	0.128382	0.50258	-4.52042	1.23493
ANKRD36C	0.477183	2.49166	2.23984	0.0301875	0.328242	-3.53923	1.39202
ANKRD37	0.347371	2.15709	1.05231	0.298386	0.670537	-5.12317	1.27224
ANKRD39	0.108718	2.30536	1.24288	0.220476	0.601603	-4.95872	1.07827
ANKRD40	-0.0174493	6.45883	-0.109811	0.913057	0.971333	-6.09844	0.987978
ANKRD42	0.240669	3.31406	2.39315	0.0210244	0.31053	-3.33276	1.18154
ANKRD44	0.294862	2.81384	1.86088	0.0694322	0.411252	-4.21546	1.22677
ANKRD45	-0.220263	-3.0662	-0.497208	0.621511	0.870876	-5.03438	0.858409
ANKRD46	-0.223474	4.31759	-1.72459	0.0916008	0.447897	-4.64762	0.856501
ANKRD49	0.0183073	3.86183	0.224745	0.823215	0.94088	-5.93418	1.01277
ANKRD50	0.439767	4.98862	2.58335	0.013174	0.286559	-3.0948	1.35639
ANKRD52	0.144497	5.98178	1.87664	0.0671894	0.407363	-4.47763	1.10535
ANKRD53	-1.02812	3.03326	-2.72969	0.00907267	0.28231	-2.61572	0.49035
ANKRD54	0.0184222	4.28215	0.248744	0.804713	0.933636	-5.99897	1.01285
ANKRD55	-0.0492984	-3.04691	-0.121058	0.904195	0.968069	-5.11106	0.966406
ANKRD6	0.285542	3.39563	2.12559	0.0391708	0.349331	-3.84765	1.21887
ANKRD60	-0.684956	-6.52338	-2.82139	0.00714123	0.27548	-2.76221	0.622025
ANKRD61	-0.200214	-0.967473	-0.916845	0.364208	0.722729	-4.88385	0.870421
ANKRD62	0.451427	-6.15192	1.23227	0.224375	0.605773	-4.62481	1.36739
ANKRD63	0.151661	-6.10273	0.404405	0.687869	0.900273	-5.06149	1.11085
ANKRD65	-0.115522	2.81395	-0.490811	0.625992	0.872547	-5.63184	0.923048
ANKRD66	0.202379	-6.11119	0.459942	0.647816	0.883148	-5.04575	1.15059
ANKRD7	-0.269558	-3.90124	-0.60219	0.55013	0.83608	-4.9946	0.829574
ANKRD9	0.0830727	3.16185	0.400066	0.691038	0.901611	-5.74202	1.05927
ANKS1A	0.152443	6.12793	1.14595	0.257992	0.63603	-5.49098	1.11145
ANKS1B	0.442836	0.73934	1.37182	0.177055	0.559992	-4.63185	1.35927
ANKS3	0.0566654	4.17813	0.643902	0.522972	0.82241	-5.81416	1.04006
ANKS4B	0.855999	-4.99192	1.91022	0.0626167	0.399	-3.97335	1.81001
ANKS6	-0.0483312	4.88881	-0.513503	0.610161	0.866181	-5.97205	0.967054
ANKUB1	0.0187591	-4.11228	0.0432859	0.965669	0.988961	-5.11247	1.01309
ANKZF1	0.292751	5.32984	2.13684	0.0381927	0.347242	-4.01307	1.22497
ANLN	0.18572	0.623483	0.381438	0.704709	0.903707	-5.29706	1.13738
ANO1	0.293269	4.96886	1.31142	0.1965	0.581799	-5.28613	1.22541
ANO10	-0.115665	5.55786	-1.19156	0.239804	0.620353	-5.44973	0.922957
ANO2	-0.0846561	3.20812	-0.340067	0.735419	0.903707	-5.77246	0.943009
ANO3	0.181302	2.9615	0.635387	0.528457	0.82564	-5.58778	1.13391
ANO4	-0.191728	-0.000459727	-0.654432	0.51623	0.819132	-5.11305	0.875556
ANO5	0.370198	0.981919	1.31708	0.194612	0.580119	-4.71105	1.29253
ANO6	0.0385142	7.6018	0.323799	0.74762	0.909489	-5.97497	1.02706
ANO7	-0.280273	-0.396526	-1.21688	0.230119	0.610759	-4.69713	0.823435
ANO8	0.0351255	4.99616	0.220483	0.826512	0.942379	-6.08436	1.02465
ANO9	0.102466	0.549917	0.358893	0.721386	0.903707	-5.2939	1.07361
ANP32A	-0.0855926	6.3243	-1.15561	0.254058	0.632209	-5.47191	0.942397
ANP32B	-0.00801108	7.26896	-0.0884032	0.929956	0.97648	-6.04617	0.994463
ANP32D	-0.266524	-6.15709	-0.706915	0.483336	0.802203	-4.95171	0.83132
ANP32E	0.0408807	5.20956	0.368438	0.714309	0.903707	-6.05466	1.02874
ANPEP	0.0313666	7.01645	0.135327	0.892969	0.965462	-6.05911	1.02198
ANTXR1	0.533372	7.17315	2.54177	0.0146164	0.288723	-3.15076	1.44731
ANTXR2	-0.0297567	7.63962	-0.143038	0.886912	0.963608	-6.01276	0.979585
ANTXRL	0.397438	-3.15146	0.544387	0.588916	0.855398	-5.01809	1.31717
ANXA1	-0.276328	9.22691	-1.7829	0.081483	0.431378	-4.45014	0.82569
ANXA10	0.692028	-5.85628	1.71178	0.0939575	0.451416	-4.18797	1.61555
ANXA11	-0.188007	8.49531	-1.91622	0.0618286	0.396171	-4.27608	0.877818
ANXA13	0.510531	-5.51547	1.0312	0.308067	0.678415	-4.76777	1.42457
ANXA2	-0.119535	9.90215	-0.848356	0.400818	0.747851	-5.51667	0.920484
ANXA2R	0.233193	2.06174	1.37109	0.17728	0.560415	-4.77937	1.17543
ANXA3	-0.751687	4.66105	-2.37133	0.0221537	0.313195	-3.51919	0.593909
ANXA4	0.180741	6.18179	1.40877	0.165912	0.545814	-5.17412	1.13347
ANXA5	-0.280726	9.34178	-2.11313	0.0402809	0.351522	-3.88707	0.823177
ANXA6	-0.345868	9.02273	-2.07902	0.0434595	0.358364	-3.96432	0.786834
ANXA7	-0.0422399	7.24734	-0.509325	0.613062	0.867321	-5.92646	0.971146
ANXA8	0.355657	-6.22033	0.880286	0.383474	0.737217	-4.86274	1.27957
ANXA8L1	-0.279708	-4.73311	-0.4855	0.629724	0.874821	-5.03469	0.823758
ANXA9	0.291577	0.97853	1.75071	0.0869459	0.439928	-4.19842	1.22398
AOAH	-0.0554162	1.9721	-0.175047	0.861844	0.955641	-5.55923	0.962317
AOC1	0.574654	-3.72933	0.898683	0.3737	0.730163	-4.85067	1.48932
AOC2	-0.0917201	3.00607	-0.407636	0.685512	0.900048	-5.70638	0.938403
AOC3	-0.192946	9.50244	-0.970349	0.337161	0.703942	-5.44076	0.874818
AOX1	-0.178764	7.74284	-0.469713	0.640873	0.879529	-5.9089	0.88346
AP000350.4	0.572767	-0.471249	1.24426	0.219971	0.601356	-4.66905	1.48737
AP000351.3	0.0556475	-6.83281	0.340064	0.735422	0.903707	-5.08201	1.03933
AP1AR	0.0168841	4.38341	0.17818	0.859397	0.954828	-6.02792	1.01177
AP1B1	-0.110347	6.53583	-0.930544	0.357152	0.717942	-5.68315	0.926365
AP1G1	-0.0458499	6.61398	-0.645075	0.522219	0.822084	-5.89376	0.968719
AP1G2	0.141365	3.74484	0.987471	0.328796	0.696166	-5.47708	1.10295
AP1M1	-0.268614	6.42552	-2.48878	0.0166627	0.296172	-3.29617	0.830116
AP1M2	1.03576	-2.03621	1.54974	0.128348	0.50258	-4.34988	2.05019
AP1S1	-0.130932	4.0046	-0.978819	0.333005	0.699736	-5.52974	0.913241
AP1S2	-0.0433099	5.07262	-0.32034	0.750222	0.911554	-6.06338	0.970426
AP1S3	0.241058	-0.477695	1.0251	0.310902	0.681868	-4.84372	1.18186
AP2A1	-0.100378	7.07082	-1.18121	0.243845	0.62353	-5.39951	0.932789
AP2A2	-0.0339344	6.86791	-0.386032	0.701328	0.903707	-6.0061	0.976753
AP2B1	0.0273008	7.62341	0.483234	0.631319	0.875834	-5.91159	1.0191
AP2M1	-0.113143	8.29558	-1.35526	0.182231	0.566062	-5.1118	0.924572
AP2S1	-0.359421	5.92621	-2.89115	0.00593578	0.27548	-2.4121	0.779478
AP3B1	-0.09515	5.7098	-1.13442	0.262744	0.639387	-5.51288	0.936175
AP3B2	-0.11706	0.827781	-0.339956	0.735503	0.903707	-5.3372	0.922065
AP3D1	-0.105015	7.09395	-1.26469	0.212623	0.596113	-5.30256	0.929795
AP3M1	-0.150173	5.60255	-1.87515	0.0673994	0.407576	-4.48421	0.901143
AP3M2	0.148716	4.48851	1.20602	0.234237	0.615931	-5.36551	1.10858
AP3S1	0.0365763	6.11711	0.509428	0.612991	0.867321	-5.99533	1.02568
AP3S2	-0.19881	6.02008	-1.92519	0.0606659	0.392986	-4.39378	0.871269
AP4B1	0.117165	4.17746	0.954065	0.345248	0.708903	-5.57924	1.0846
AP4E1	0.0657197	4.3521	0.80739	0.423773	0.766384	-5.72651	1.04661
AP4M1	0.039705	3.80448	0.419629	0.676793	0.896122	-5.86377	1.0279
AP4S1	-0.0797907	1.87822	-0.747846	0.45852	0.788101	-5.31305	0.946195
AP5B1	-0.166037	3.15881	-0.958838	0.342865	0.707775	-5.39154	0.891287
AP5M1	-0.124534	4.32558	-1.35045	0.183757	0.567194	-5.17361	0.9173
AP5S1	-0.467125	3.07766	-3.00927	0.0043169	0.27548	-2.0002	0.723405
AP5Z1	0.00579955	5.61507	0.0714283	0.94338	0.981123	-6.12849	1.00403
APAF1	0.198242	4.10849	1.41542	0.163965	0.54246	-5.0611	1.1473
APBA1	0.207467	3.38084	1.24478	0.219784	0.601356	-5.14687	1.15466
APBA2	0.0023698	0.594828	0.00826228	0.993445	0.998601	-5.35109	1.00164
APBA3	0.00617843	3.6785	0.0558918	0.95568	0.98496	-5.92184	1.00429
APBB1	0.160188	5.39165	1.33938	0.187304	0.57204	-5.27114	1.11743
APBB1IP	-0.390222	5.83444	-1.60893	0.114764	0.48291	-4.90464	0.763012
APBB2	-0.143305	6.96612	-0.969944	0.337361	0.70415	-5.62061	0.905443
APBB3	0.228233	5.26166	1.55959	0.126	0.497862	-4.97096	1.1714
APC	0.180298	5.36751	1.91139	0.062463	0.398839	-4.41921	1.13312
APC2	0.220297	0.139149	0.895328	0.37547	0.731747	-4.98704	1.16497
APCDD1	-0.387861	6.34426	-1.00583	0.319982	0.690854	-5.62422	0.764262
APCDD1L	0.635392	-1.61996	1.00494	0.320405	0.691115	-4.79628	1.55336
APCS	-0.655646	-5.84801	-1.35145	0.183438	0.567194	-4.52735	0.634791
APEH	-0.159036	5.62411	-1.64104	0.1079	0.473858	-4.8581	0.895623
APEX1	-0.14252	6.68845	-1.49409	0.14227	0.518141	-5.034	0.905935
APEX2	-0.137923	4.19569	-1.53807	0.131172	0.504681	-4.90773	0.908827
APH1A	-0.0485689	6.74423	-0.509793	0.612737	0.867221	-5.9608	0.966895
APH1B	0.216254	4.72862	2.80434	0.00746877	0.27548	-2.58778	1.16171
API5	-0.057148	6.17856	-0.793197	0.431908	0.77164	-5.81458	0.961162
APIP	-0.319702	4.54124	-2.33006	0.0244397	0.316902	-3.59234	0.801235
APLF	0.210194	2.20914	1.58645	0.119779	0.491427	-4.53218	1.15684
APLN	-0.0134069	1.58402	-0.0169026	0.986591	0.996006	-5.50328	0.99075
APLNR	-0.0133866	4.39778	-0.0231198	0.981659	0.9947	-6.045	0.990764
APLP1	-0.132546	0.653724	-0.490176	0.626438	0.872834	-5.26337	0.91222
APLP2	0.163032	9.10725	2.07097	0.044241	0.359631	-3.97428	1.11964
APMAP	-0.465595	7.4952	-2.09859	0.0416101	0.354515	-4.01335	0.724172
APOA1	-0.856663	-2.43443	-1.98426	0.0534672	0.375692	-3.88662	0.552228
APOA2	-0.0437499	-4.46719	-0.0779951	0.938185	0.979044	-5.11037	0.97013
APOA4	-0.0893697	-5.11262	-0.137826	0.891005	0.964736	-5.10584	0.939933
APOA5	0.275556	-5.43514	0.671456	0.50543	0.812733	-4.96497	1.21046
APOB	-1.38129	2.66733	-2.22485	0.0312516	0.329783	-3.58229	0.383875
APOBEC1	0.0066572	-6.41022	0.0253462	0.979893	0.994271	-5.11737	1.00463
APOBEC2	0.95943	-2.55108	1.82525	0.074736	0.420304	-4.06681	1.94454
APOBEC3A	-0.619927	-0.093697	-1.39279	0.170661	0.551962	-4.55204	0.650704
APOBEC3B	-0.414942	-2.34053	-0.704308	0.484941	0.802895	-4.95405	0.750049
APOBEC3C	0.323496	4.47258	1.67613	0.100785	0.462037	-4.73998	1.25136
APOBEC3D	0.140849	1.36959	0.501498	0.618513	0.869874	-5.36177	1.10255
APOBEC3F	0.493407	0.898687	1.86256	0.0691904	0.410982	-4.04263	1.40776
APOBEC3G	0.323675	2.07788	1.19883	0.236993	0.618153	-4.96917	1.25151
APOBEC3H	0.650331	-2.35724	1.32214	0.192935	0.578046	-4.55303	1.56953
APOBEC4	0.0436414	-6.24992	0.117886	0.906693	0.969243	-5.11183	1.03071
APOBR	-0.0141705	2.48179	-0.0429812	0.96591	0.989022	-5.67189	0.990226
APOC1	-0.29946	3.55083	-0.677812	0.501429	0.811188	-5.68147	0.812556
APOC2	0.225826	-5.98905	0.623623	0.536086	0.82977	-4.98699	1.16945
APOC3	-1.17868	-4.50309	-1.78767	0.0806982	0.430841	-4.10816	0.441756
APOC4	0.630836	-4.89145	1.15354	0.254899	0.632842	-4.68237	1.54846
APOD	0.367824	10.0549	1.34957	0.184037	0.567593	-5.00559	1.29041
APOE	-0.253081	8.29293	-0.777775	0.440852	0.775397	-5.68492	0.839103
APOF	-0.0183059	-5.03223	-0.0419213	0.966751	0.989244	-5.11147	0.987391
APOH	-0.226604	-5.25276	-0.338125	0.736873	0.904133	-5.07464	0.854644
APOL1	-0.116951	5.45787	-0.604568	0.548562	0.83539	-5.95175	0.922134
APOL2	-0.505844	5.94473	-2.35649	0.0229524	0.315573	-3.58489	0.704248
APOL3	-0.0213474	7.22907	-0.161443	0.872481	0.958616	-6.04023	0.985312
APOL4	-1.2438	4.72351	-2.54683	0.0144336	0.287415	-3.15801	0.42226
APOL5	-0.145876	-3.20062	-0.28851	0.774307	0.920959	-5.08807	0.90383
APOL6	-0.408553	7.10193	-1.5817	0.120859	0.4924	-4.88561	0.753379
APOLD1	-0.426646	8.18536	-1.26756	0.211604	0.595105	-5.22525	0.74399
APOM	0.0738724	1.23399	0.51267	0.610739	0.866231	-5.33623	1.05254
APOO	-0.246	1.97332	-1.89826	0.0642148	0.403545	-4.06094	0.843231
APOOL	0.264664	1.10267	2.2159	0.031902	0.330582	-3.51691	1.20136
APOPT1	-0.21924	4.80779	-1.8114	0.0768896	0.42383	-4.55803	0.859018
APP	0.126779	9.1357	1.19095	0.240038	0.62038	-5.24601	1.09185
APPBP2	-0.0390496	5.84354	-0.48804	0.627938	0.87385	-6.01353	0.973296
APPL1	0.0537859	5.89807	0.660214	0.512548	0.816674	-5.91693	1.03799
APPL2	0.124116	6.23187	0.722677	0.473691	0.796815	-5.86354	1.08984
APRT	-0.380228	5.84214	-2.60006	0.0126321	0.283942	-3.07326	0.768316
APTX	-0.0547249	4.33722	-1.05635	0.296557	0.668925	-5.50515	0.962778
AQP1	0.425002	9.4472	2.00287	0.0513584	0.370899	-4.07624	1.34257
AQP10	0.722484	-3.80969	1.52946	0.133289	0.506931	-4.36828	1.65002
AQP11	-0.283561	1.07752	-1.51963	0.135737	0.510726	-4.49546	0.821561
AQP12A	-0.563677	-6.45551	-2.02122	0.0493486	0.367082	-3.84263	0.676575
AQP12B	-0.323709	-5.95565	-0.75609	0.453613	0.785272	-4.92733	0.799013
AQP2	0.407355	-4.93312	0.725595	0.471918	0.795862	-4.93994	1.32625
AQP3	-0.0255698	2.85815	-0.0791169	0.937297	0.978954	-5.74877	0.982433
AQP4	-0.416714	-1.67016	-0.863374	0.392601	0.743516	-4.88127	0.749129
AQP5	0.902577	-2.87469	1.07369	0.288797	0.662184	-4.74124	1.8694
AQP6	-0.139039	-5.26731	-0.262801	0.793927	0.928184	-5.08954	0.908124
AQP7	-0.778867	7.608	-1.87548	0.0673523	0.407576	-4.39729	0.582824
AQP8	0.206608	-2.12943	0.726948	0.471097	0.795189	-4.94439	1.15397
AQP9	-0.458985	2.22342	-0.910762	0.36737	0.725138	-5.25503	0.727498
AQR	-0.0560202	5.49775	-1.03442	0.306577	0.67758	-5.61474	0.961914
AR	-0.10541	6.00816	-0.440959	0.661395	0.889981	-6.03067	0.929541
ARAF	-0.143423	6.32814	-1.93393	0.0595514	0.390986	-4.36784	0.905369
ARAP1	0.0792944	6.54922	0.477746	0.635189	0.877173	-5.98835	1.0565
ARAP2	0.0700209	3.26397	0.416959	0.67873	0.896992	-5.75698	1.04973
ARAP3	-0.0711834	6.06654	-0.504263	0.616585	0.869208	-5.9997	0.951857
ARC	-0.0641314	0.999719	-0.317311	0.752505	0.911984	-5.36813	0.956521
ARCN1	-0.121954	7.51427	-0.907459	0.369093	0.726001	-5.63854	0.918942
AREG	-1.05779	-1.10338	-1.78541	0.0810685	0.430885	-4.10672	0.480366
AREL1	-0.0973251	5.01391	-1.12903	0.264984	0.641839	-5.49824	0.934765
ARF1	-0.158025	8.51663	-2.09443	0.0419971	0.355679	-3.96387	0.896251
ARF3	0.0105903	6.96899	0.154443	0.877965	0.960356	-6.05975	1.00737
ARF4	-0.221969	7.16874	-1.74889	0.0872643	0.440413	-4.62889	0.857394
ARF5	-0.172236	6.0716	-2.54929	0.0143454	0.286777	-3.17895	0.887466
ARF6	-0.059467	5.50915	-0.573785	0.569027	0.844306	-5.97022	0.959619
ARFGAP1	0.0197659	6.26912	0.191823	0.848761	0.950475	-6.09659	1.01379
ARFGAP2	-0.0652133	6.53259	-0.70211	0.486298	0.803194	-5.86175	0.955804
ARFGAP3	-0.00780318	5.88103	-0.0844002	0.93312	0.97718	-6.12521	0.994606
ARFGEF1	0.0570732	5.9745	0.734316	0.46664	0.792593	-5.86513	1.04035
ARFGEF2	0.0572269	6.13435	0.570474	0.57125	0.84548	-5.96275	1.04046
ARFIP1	-0.0486732	5.05223	-0.676973	0.501957	0.811423	-5.89011	0.966825
ARFIP2	-0.101416	5.10336	-1.2988	0.200757	0.585434	-5.30989	0.932118
ARFRP1	-0.190893	5.12691	-2.07405	0.0439407	0.359436	-4.12228	0.876063
ARG1	-1.33349	-0.1823	-2.7798	0.00796443	0.27548	-2.64709	0.396807
ARG2	-0.230588	0.0278886	-0.795368	0.430657	0.770761	-5.03938	0.852287
ARGFX	0.0400914	-6.65109	0.148338	0.882752	0.962314	-5.11192	1.02818
ARGLU1	0.147342	7.61231	1.29323	0.202662	0.587472	-5.23427	1.10753
ARHGAP1	0.2394	7.73973	2.05677	0.0456501	0.361825	-4.07553	1.1805
ARHGAP10	0.299721	6.36574	1.64193	0.107713	0.473284	-4.83811	1.23091
ARHGAP11A	-0.0768017	1.57266	-0.359727	0.720767	0.903707	-5.44619	0.948157
ARHGAP11B	-0.15846	0.779387	-0.684966	0.496948	0.809159	-5.18857	0.895981
ARHGAP12	0.229251	5.51942	2.19045	0.0338188	0.3369	-3.91488	1.17223
ARHGAP15	0.0253528	2.79633	0.0981941	0.922223	0.974165	-5.73411	1.01773
ARHGAP17	0.0703699	6.07265	0.888144	0.379279	0.734866	-5.74223	1.04999
ARHGAP18	-0.263217	4.96478	-1.39478	0.170064	0.551049	-5.18071	0.833228
ARHGAP19	0.190943	3.81966	1.47103	0.148378	0.525614	-4.94371	1.14151
ARHGAP19-SLIT1	0.0556475	-6.83281	0.340064	0.735422	0.903707	-5.08201	1.03933
ARHGAP20	-0.121102	5.2404	-0.499505	0.619905	0.870694	-6.00097	0.919485
ARHGAP21	0.22146	7.41135	1.60053	0.116618	0.486128	-4.83906	1.16591
ARHGAP22	0.208311	1.91545	0.638502	0.526447	0.824302	-5.38479	1.15533
ARHGAP23	0.194837	6.04516	1.44213	0.156326	0.534523	-5.13475	1.1446
ARHGAP24	-0.0982205	4.93769	-0.688324	0.494852	0.807975	-5.87459	0.934185
ARHGAP25	-0.0317813	4.06412	-0.131715	0.895808	0.966187	-5.98583	0.978212
ARHGAP26	-0.0856617	5.60556	-0.530361	0.598521	0.859745	-5.99423	0.942352
ARHGAP27	-0.0689496	5.4385	-0.475506	0.636772	0.877282	-6.01878	0.953332
ARHGAP28	0.197206	3.89213	1.05658	0.296453	0.668856	-5.43705	1.14648
ARHGAP29	-0.077073	7.40688	-0.660515	0.512357	0.81667	-5.8303	0.947979
ARHGAP30	-0.164799	4.48737	-0.607662	0.546526	0.834088	-5.87931	0.892053
ARHGAP31	-0.170361	6.46327	-1.23433	0.223612	0.60507	-5.37621	0.88862
ARHGAP32	0.167826	4.93584	1.43492	0.158361	0.536129	-5.12604	1.12336
ARHGAP33	0.322803	4.38917	1.65443	0.105138	0.470011	-4.76321	1.25076
ARHGAP35	0.154549	6.69775	1.11121	0.272495	0.647827	-5.49864	1.11307
ARHGAP36	-0.536192	-5.07389	-0.96522	0.339695	0.705495	-4.80943	0.689589
ARHGAP39	0.118675	2.46829	0.697203	0.489333	0.804447	-5.45171	1.08574
ARHGAP4	-0.210375	5.71059	-1.04081	0.303634	0.674406	-5.60945	0.864313
ARHGAP40	0.134519	-4.70747	0.208358	0.835908	0.946077	-5.0978	1.09773
ARHGAP42	0.0574107	4.18716	0.501886	0.618243	0.869874	-5.89329	1.0406
ARHGAP44	0.31353	2.97884	1.72434	0.0916468	0.447897	-4.44856	1.24274
ARHGAP5	0.111764	6.17904	0.985581	0.329712	0.696913	-5.651	1.08055
ARHGAP6	0.144933	5.28317	1.29875	0.200777	0.585434	-5.31812	1.10568
ARHGAP8	0.731527	0.958629	2.38671	0.0213519	0.311098	-3.23504	1.6604
ARHGAP9	-0.182571	3.44912	-0.610238	0.544834	0.833791	-5.70211	0.881131
ARHGDIA	-0.206499	7.42993	-1.92431	0.0607796	0.393156	-4.32541	0.866638
ARHGDIB	-0.0187481	6.99635	-0.100271	0.920584	0.973747	-6.06453	0.987089
ARHGDIG	0.132458	0.0153841	0.412946	0.681646	0.897825	-5.21197	1.09616
ARHGEF1	-0.0942332	7.14667	-0.969537	0.337562	0.70415	-5.60888	0.93677
ARHGEF10	0.194201	6.22207	2.13024	0.0387636	0.348332	-4.01843	1.14409
ARHGEF10L	0.38007	6.34614	2.83755	0.0068433	0.27548	-2.52678	1.3014
ARHGEF11	0.103304	6.39479	1.52403	0.134638	0.509304	-5.00806	1.07423
ARHGEF12	0.137922	7.41906	1.44992	0.154151	0.532602	-5.04865	1.10032
ARHGEF15	-0.367	6.92456	-1.97523	0.0545177	0.378599	-4.26602	0.775393
ARHGEF16	-0.572005	2.91343	-1.6007	0.116579	0.48608	-4.61619	0.672681
ARHGEF17	0.0771945	7.55734	0.651638	0.518015	0.82024	-5.82501	1.05496
ARHGEF18	-0.00134279	5.08447	-0.0201796	0.983991	0.995035	-6.11382	0.99907
ARHGEF19	0.147788	3.01939	0.840327	0.405255	0.752158	-5.46124	1.10787
ARHGEF2	-0.0987788	6.83029	-0.814716	0.419611	0.763543	-5.76131	0.933823
ARHGEF25	0.531681	4.7031	2.24313	0.0299584	0.32712	-3.77688	1.44561
ARHGEF26	-0.213788	4.72653	-0.729627	0.469474	0.794696	-5.8279	0.86227
ARHGEF28	0.0779186	4.333	0.395654	0.694267	0.902508	-5.96072	1.05549
ARHGEF3	0.0289581	4.97876	0.146877	0.883898	0.962399	-6.09625	1.02028
ARHGEF33	0.349513	-0.627147	1.63101	0.110006	0.476858	-4.28271	1.27413
ARHGEF35	0.18722	-0.362021	0.332569	0.741034	0.906604	-5.19327	1.13857
ARHGEF37	0.560436	3.94165	2.18248	0.0344394	0.338071	-3.8142	1.47472
ARHGEF38	0.772906	-4.91964	1.55914	0.126107	0.497862	-4.33985	1.70871
ARHGEF39	0.0514018	2.87167	0.268525	0.789546	0.926885	-5.72132	1.03627
ARHGEF4	-0.0851701	3.24949	-0.362703	0.718558	0.903707	-5.7737	0.942673
ARHGEF40	-0.0505084	7.10448	-0.441334	0.661126	0.889981	-5.96769	0.965596
ARHGEF5	0.065004	2.06243	0.473338	0.638305	0.877957	-5.49106	1.04609
ARHGEF6	-0.196741	6.76503	-1.0118	0.31715	0.688067	-5.59428	0.872519
ARHGEF7	-0.082416	7.36102	-0.861331	0.393712	0.743587	-5.68799	0.944475
ARHGEF9	0.46804	4.46475	2.2979	0.0263655	0.318474	-3.64941	1.38323
ARID1A	0.0279197	6.82947	0.371113	0.712329	0.903707	-6.01415	1.01954
ARID1B	0.0803424	6.44615	1.33871	0.187522	0.572415	-5.25146	1.05727
ARID2	0.130988	5.00924	1.49337	0.142455	0.518141	-5.05163	1.09504
ARID3A	-0.0216963	4.30008	-0.1202	0.904871	0.968314	-6.02444	0.985074
ARID3B	0.267662	3.04019	2.18147	0.0345191	0.338169	-3.7014	1.20386
ARID3C	0.231864	-3.88375	0.562672	0.576506	0.848957	-5.00968	1.17435
ARID4A	0.213164	5.49072	2.35207	0.0231951	0.316795	-3.5958	1.15923
ARID4B	0.166521	5.77702	2.09098	0.042321	0.355912	-4.10217	1.12235
ARID5A	0.195985	5.82392	0.874423	0.386622	0.739077	-5.7602	1.14551
ARID5B	0.170041	7.36186	0.969445	0.337607	0.70415	-5.5942	1.12509
ARIH1	0.0128514	6.38076	0.190302	0.849945	0.950908	-6.09113	1.00895
ARIH2	-0.113629	6.27002	-1.22672	0.226434	0.60662	-5.39464	0.92426
ARIH2OS	0.142037	0.996812	0.715891	0.47783	0.798785	-5.19987	1.10346
ARL1	-0.0504343	5.91664	-0.61391	0.542427	0.833103	-5.94499	0.965646
ARL10	0.368956	3.79292	1.64265	0.107563	0.473172	-4.69871	1.29142
ARL11	-0.398381	0.475042	-1.10428	0.275456	0.64984	-4.86135	0.758709
ARL13A	0.583749	-3.55168	1.2991	0.200657	0.585434	-4.57104	1.49874
ARL13B	-0.00714335	3.5327	-0.066516	0.947268	0.982877	-5.89204	0.995061
ARL14	-0.363388	-6.44575	-1.09612	0.278972	0.653254	-4.72663	0.777337
ARL14EP	0.0397715	4.31357	0.567441	0.57329	0.847086	-5.87861	1.02795
ARL14EPL	-0.468104	-3.9849	-0.89679	0.374698	0.73102	-4.85126	0.722914
ARL15	0.0207707	4.21245	0.14261	0.887247	0.963608	-6.00841	1.0145
ARL16	0.069666	4.52007	0.659574	0.512955	0.816765	-5.85177	1.04947
ARL17A	0.0876957	0.369108	0.322969	0.748244	0.910062	-5.2801	1.06267
ARL17B	0.213797	-0.0173293	0.579481	0.565212	0.842072	-5.146	1.15974
ARL2	-0.016752	6.33707	-0.210404	0.834321	0.945801	-6.08958	0.988456
ARL2BP	-0.10351	5.5928	-1.24714	0.218927	0.60087	-5.38611	0.930766
ARL3	0.226042	4.6193	2.27901	0.0275588	0.322665	-3.70009	1.16962
ARL4A	-0.0028968	4.63609	-0.0195138	0.984519	0.995221	-6.07485	0.997994
ARL4C	0.261827	4.43516	0.870692	0.388634	0.740834	-5.68714	1.199
ARL4D	-0.136019	3.19311	-0.56987	0.571656	0.845494	-5.67206	0.910027
ARL5A	-0.168765	5.27547	-1.54048	0.130585	0.504583	-4.99878	0.889604
ARL5B	0.130435	4.83465	0.650334	0.518848	0.820686	-5.89061	1.09462
ARL5C	0.62094	-5.2039	1.25199	0.217168	0.598869	-4.60777	1.53788
ARL6	0.0578789	1.20375	0.390876	0.69777	0.903707	-5.37733	1.04093
ARL6IP1	-0.23373	7.30419	-1.35934	0.180945	0.564683	-5.17349	0.850434
ARL6IP4	-0.0699553	6.44842	-1.12897	0.265012	0.641839	-5.4942	0.952668
ARL6IP5	-0.075918	7.46724	-0.608212	0.546165	0.833944	-5.85768	0.948738
ARL6IP6	0.0508828	4.09893	0.413966	0.680904	0.897346	-5.91776	1.0359
ARL8A	-0.0175101	5.65723	-0.180459	0.857619	0.953962	-6.11524	0.987936
ARL8B	0.0191679	6.53188	0.241222	0.810501	0.93603	-6.07177	1.01337
ARL9	1.8268	-3.36863	3.91956	0.000305312	0.235149	-0.993096	3.54749
ARMC1	-0.0179093	4.87339	-0.21048	0.834262	0.945794	-6.077	0.987663
ARMC10	0.0346227	4.7949	0.512507	0.610852	0.866231	-5.96412	1.02429
ARMC12	0.053153	0.331314	0.187798	0.851896	0.9517	-5.30221	1.03753
ARMC2	-0.137516	2.30059	-1.02052	0.313045	0.683646	-5.17601	0.909083
ARMC3	-0.129194	-5.39978	-0.302882	0.763403	0.916277	-5.08231	0.914342
ARMC4	1.63473	-2.72103	2.47099	0.0174058	0.297693	-3.26695	3.10529
ARMC5	-0.143372	3.78266	-1.41817	0.163164	0.541316	-5.00704	0.9054
ARMC6	-0.417213	4.16357	-3.19032	0.00261688	0.274467	-1.6323	0.74887
ARMC7	0.209322	3.33102	1.58331	0.120491	0.492045	-4.70911	1.15614
ARMC8	-0.218579	5.98032	-1.16336	0.250938	0.629581	-5.47684	0.859412
ARMC9	0.437539	2.22742	1.60841	0.114877	0.483165	-4.50524	1.35429
ARMCX1	0.234424	5.1578	1.78528	0.0810911	0.430885	-4.62194	1.17644
ARMCX2	0.441347	4.33397	2.11221	0.0403633	0.351944	-3.9905	1.35787
ARMCX3	0.0473144	6.15133	0.642054	0.52416	0.823338	-5.92015	1.03334
ARMCX4	0.300982	4.62542	2.10318	0.0411863	0.35253	-4.03553	1.23198
ARMCX5	0.0261523	3.31817	0.284679	0.777222	0.921269	-5.81167	1.01829
ARMCX6	0.0961393	3.16844	0.666656	0.508463	0.814664	-5.61158	1.06891
ARMS2	0.2534	-3.09865	0.414573	0.680463	0.897346	-5.05909	1.19201
ARNT	0.163929	6.60116	2.4408	0.0187366	0.301268	-3.38929	1.12033
ARNT2	1.22932	1.95188	2.55599	0.0141078	0.286559	-2.92512	2.34456
ARNTL	-0.541735	5.14535	-1.95965	0.0563718	0.382545	-4.32793	0.686944
ARNTL2	0.124721	2.75418	0.543697	0.589386	0.85556	-5.59456	1.0903
ARPC1A	-0.120796	6.23713	-1.60364	0.115927	0.485462	-4.90064	0.91968
ARPC1B	-0.215969	6.26161	-1.29764	0.201153	0.585697	-5.31103	0.860967
ARPC2	-0.159344	8.06712	-1.7343	0.0898463	0.445172	-4.59649	0.895432
ARPC3	-0.237516	6.99278	-3.14267	0.00298958	0.274467	-1.77543	0.848205
ARPC4	-0.0833002	6.90352	-1.22904	0.225571	0.606252	-5.35629	0.943896
ARPC5	-0.143304	6.84515	-1.49905	0.140981	0.517608	-5.01797	0.905443
ARPC5L	-0.360406	5.04849	-4.00107	0.000237454	0.235149	0.481539	0.778945
ARPP19	-0.0990695	7.29325	-0.952604	0.34598	0.709614	-5.61424	0.933635
ARPP21	0.205915	-2.38979	0.306337	0.760789	0.915509	-5.08595	1.15342
ARR3	0.67773	-3.458	1.66729	0.10254	0.464593	-4.23357	1.59962
ARRB1	-0.411121	5.67545	-2.61585	0.0121386	0.28231	-3.03992	0.752039
ARRB2	-0.0125584	5.64415	-0.0552042	0.956225	0.984967	-6.12959	0.991333
ARRDC1	-0.0667863	5.24196	-0.628392	0.532987	0.828195	-5.93075	0.954762
ARRDC2	0.0613442	6.85696	0.303293	0.763092	0.916251	-6.03442	1.04344
ARRDC3	0.400818	6.3999	1.25653	0.215534	0.598867	-5.35361	1.32026
ARRDC4	0.00609242	4.42438	0.0326638	0.97409	0.99232	-6.04843	1.00423
ARRDC5	-0.161186	-2.49433	-0.403783	0.688322	0.900314	-5.06287	0.89429
ARSA	-0.0712324	5.51292	-0.606835	0.54707	0.83444	-5.9514	0.951825
ARSB	0.0319637	3.96611	0.212507	0.83269	0.945062	-5.95549	1.0224
ARSD	-0.0585419	5.36865	-0.324889	0.7468	0.909161	-6.07553	0.960234
ARSE	0.970744	-3.60601	1.64196	0.107706	0.473284	-4.25907	1.95985
ARSF	0.510106	-5.55716	0.953865	0.345348	0.708903	-4.81697	1.42415
ARSG	0.142374	2.88132	1.20376	0.2351	0.616517	-5.10003	1.10372
ARSH	0.155632	-6.56867	0.523282	0.603396	0.862556	-5.02815	1.11391
ARSI	0.16354	-0.708935	0.342132	0.733876	0.903707	-5.15697	1.12003
ARSJ	0.492312	1.70445	1.63684	0.108778	0.475251	-4.4069	1.4067
ARSK	0.26264	2.76402	1.79766	0.0790762	0.427226	-4.30652	1.19967
ART1	-0.0635762	-6.19845	-0.147892	0.883102	0.962399	-5.10883	0.956889
ART3	1.17953	-0.578743	2.91533	0.00556418	0.27548	-2.46955	2.26503
ART4	0.786299	0.927782	1.93377	0.0595718	0.390986	-3.94338	1.72464
ART5	0.95207	-2.01917	1.6594	0.104127	0.467614	-4.24169	1.93465
ARTN	0.224898	-0.878438	0.607198	0.546831	0.834265	-5.05354	1.16869
ARV1	0.00197379	3.54308	0.024783	0.98034	0.994271	-5.89596	1.00137
ARVCF	0.460851	4.19401	2.06975	0.0443612	0.360324	-4.0523	1.37635
ARX	-0.577756	-6.01642	-1.10967	0.273154	0.648089	-4.71545	0.670005
AS3MT	0.44026	2.402	1.63078	0.110054	0.476858	-4.4982	1.35685
ASAH1	0.0238153	8.31498	0.126665	0.899781	0.967223	-5.96306	1.01664
ASAH2	-0.574585	-2.14383	-1.41384	0.164427	0.543222	-4.47478	0.671479
ASAH2B	-0.00729142	0.698496	-0.0456036	0.963832	0.988241	-5.3647	0.994959
ASAP1	0.0447687	6.99305	0.495718	0.622553	0.871243	-5.95091	1.03152
ASAP2	0.258407	4.83114	2.14402	0.0375796	0.345551	-3.9756	1.19616
ASAP3	0.29643	5.869	2.03489	0.0478967	0.366321	-4.20344	1.2281
ASB1	0.146513	5.21049	1.47568	0.14713	0.523931	-5.08645	1.10689
ASB10	1.34146	-4.81948	2.34958	0.023333	0.316902	-3.43454	2.53408
ASB11	1.35988	-3.40023	2.68801	0.0101011	0.28231	-2.96316	2.56664
ASB12	0.38094	-6.27379	1.22565	0.226832	0.607052	-4.63034	1.30219
ASB13	-0.110927	4.78319	-0.596034	0.554198	0.838391	-5.91837	0.925993
ASB14	0.28983	0.861315	1.93524	0.059386	0.390781	-3.93895	1.2225
ASB15	0.0866923	-5.50131	0.161659	0.872313	0.958616	-5.10414	1.06193
ASB16	0.313083	0.0207325	1.54892	0.128544	0.502747	-4.39407	1.24236
ASB17	0.0436215	-6.57737	0.159205	0.874234	0.959024	-5.1103	1.0307
ASB18	0.677361	-5.92875	1.43107	0.159454	0.536489	-4.45845	1.59921
ASB2	1.23058	1.4819	2.34063	0.0238348	0.316902	-3.3121	2.34661
ASB4	-0.679388	-2.80291	-1.74962	0.0871365	0.440132	-4.14824	0.62443
ASB5	0.867714	-3.10393	1.41653	0.163641	0.542309	-4.4717	1.82477
ASB6	-0.193863	3.93618	-3.30087	0.0019142	0.274467	-1.34479	0.874262
ASB7	0.0899939	3.73537	0.999165	0.323162	0.693143	-5.46456	1.06437
ASB8	-0.0295395	4.97878	-0.497637	0.621211	0.870876	-5.98663	0.979733
ASB9	0.00190768	0.779962	0.00874844	0.993059	0.998485	-5.37709	1.00132
ASCC1	0.0227768	4.56507	0.224409	0.823475	0.94088	-6.0423	1.01591
ASCC2	-0.236928	6.12543	-2.92097	0.00548063	0.27548	-2.33787	0.84855
ASCC3	0.00796648	4.91074	0.0746399	0.940839	0.980152	-6.09888	1.00554
ASCL1	0.363848	-4.15656	0.578269	0.566022	0.842885	-5.00326	1.28685
ASCL2	0.71259	-1.25567	1.76874	0.0838488	0.433706	-4.12566	1.63874
ASCL3	1.09233	-5.65997	2.32159	0.0249343	0.316902	-3.4702	2.13218
ASCL4	0.388385	-4.94196	0.77089	0.44488	0.778477	-4.91799	1.30893
ASCL5	0.310715	-4.4491	0.7232	0.473373	0.796807	-4.94139	1.24032
ASF1A	0.0714066	3.43293	0.676175	0.502459	0.81149	-5.65927	1.05074
ASF1B	-0.47132	-0.222809	-1.15635	0.25376	0.632084	-4.75972	0.721305
ASGR1	-0.241912	0.308082	-0.874218	0.386733	0.739211	-5.01833	0.845624
ASGR2	-0.311898	-0.32121	-0.882594	0.382238	0.736285	-4.95332	0.805581
ASH1L	0.149507	6.75978	1.47242	0.148005	0.52541	-5.05953	1.10919
ASH2L	-0.237684	5.58672	-1.88909	0.0654627	0.40441	-4.46056	0.848106
ASIC1	0.404672	0.863412	1.0244	0.311228	0.682115	-4.96825	1.32379
ASIC2	0.295195	-5.21564	0.545897	0.587886	0.854969	-5.01444	1.22705
ASIC3	0.114094	1.89424	0.629755	0.532102	0.827734	-5.38593	1.08229
ASIC4	0.357899	-1.98876	0.658928	0.513366	0.817034	-4.97649	1.28156
ASIC5	0.205378	-6.72481	0.920511	0.362311	0.721283	-4.8418	1.15299
ASIP	1.14396	-1.65099	2.45729	0.0179986	0.298767	-3.27218	2.20987
ASL	-0.200112	4.98705	-2.14955	0.0371126	0.344402	-3.97488	0.870483
ASMT	0.0556475	-6.83281	0.340064	0.735422	0.903707	-5.08201	1.03933
ASMTL	0.0556475	-6.83281	0.340064	0.735422	0.903707	-5.08201	1.03933
ASNA1	-0.148344	5.54979	-1.83826	0.0727619	0.4157	-4.54565	0.902286
ASNS	0.151595	4.32196	0.839093	0.40594	0.752571	-5.69763	1.1108
ASNSD1	-0.0860763	5.22889	-0.908312	0.368647	0.725871	-5.72356	0.942081
ASPA	0.299523	3.67866	0.949909	0.347332	0.711032	-5.49899	1.23074
ASPDH	0.156434	-2.84151	0.453547	0.652378	0.885843	-5.04836	1.11453
ASPG	0.222517	-0.4501	0.366698	0.715597	0.903707	-5.17557	1.16677
ASPH	-0.0579259	8.72639	-0.264952	0.792281	0.927937	-5.90519	0.960644
ASPHD1	0.490299	-0.921765	1.07001	0.290434	0.663606	-4.78263	1.40474
ASPHD2	0.261185	0.327261	1.39879	0.168866	0.549579	-4.57217	1.19846
ASPM	0.0669598	-0.265064	0.13753	0.891237	0.964834	-5.23752	1.04751
ASPN	0.791306	4.28826	2.06232	0.0450953	0.360951	-4.07652	1.73064
ASPRV1	0.204345	1.87971	1.40928	0.165762	0.545486	-4.71054	1.15216
ASPSCR1	-0.210261	4.53439	-2.35318	0.0231339	0.316795	-3.54543	0.864381
ASRGL1	-0.377897	3.31566	-1.60089	0.116538	0.48608	-4.6818	0.769559
ASS1	-0.483441	7.94283	-2.53786	0.0147592	0.289179	-3.12313	0.71527
ASTE1	0.166779	2.78824	1.40647	0.166588	0.546531	-4.85021	1.12255
ASTL	0.334106	-4.30761	0.674131	0.503744	0.811895	-4.96386	1.2606
ASTN1	-0.275041	-2.55674	-0.544109	0.589105	0.855401	-5.01903	0.826427
ASTN2	0.00480024	1.27553	0.0255851	0.979704	0.994271	-5.45206	1.00333
ASXL1	-0.038492	7.26363	-0.439875	0.662175	0.890356	-5.957	0.973672
ASXL2	0.0717619	5.38792	0.9197	0.36273	0.721439	-5.71918	1.051
ASXL3	0.644678	1.01306	2.50219	0.0161215	0.294715	-3.03478	1.56339
ASZ1	0.17511	-6.61423	0.730241	0.469102	0.794386	-4.94336	1.12905
ATAD1	0.0581837	5.48793	0.637822	0.526886	0.82459	-5.93238	1.04115
ATAD2	0.0172167	3.6363	0.137311	0.891409	0.964911	-5.9061	1.01201
ATAD2B	0.00271153	4.59605	0.0282724	0.977572	0.993322	-6.06998	1.00188
ATAD3A	-0.341869	4.24395	-2.89077	0.0059417	0.27548	-2.35431	0.789018
ATAD3B	-0.0933747	4.36979	-0.858972	0.394998	0.744276	-5.68808	0.937328
ATAD3C	0.227514	0.446867	0.860953	0.393918	0.743587	-5.04204	1.17082
ATAD5	0.0389657	2.0047	0.243285	0.808912	0.935395	-5.55275	1.02738
ATAT1	0.136053	3.34334	1.32577	0.191739	0.577176	-5.04591	1.09889
ATCAY	-0.391525	-2.98867	-0.952379	0.346093	0.709635	-4.81997	0.762323
ATE1	-0.0192512	5.04338	-0.249452	0.804169	0.933444	-6.0811	0.986745
ATF1	-0.0567846	4.33288	-0.638768	0.526276	0.824197	-5.84013	0.961404
ATF2	0.0680439	5.76793	0.928801	0.358045	0.718919	-5.71408	1.04829
ATF3	0.11426	5.70691	0.276526	0.783435	0.924542	-6.09379	1.08242
ATF4	0.0173234	9.16512	0.160964	0.872856	0.958616	-5.89287	1.01208
ATF5	-0.232536	5.61073	-0.794672	0.431058	0.771176	-5.8253	0.851138
ATF6	0.00561135	5.89415	0.0682258	0.945914	0.982118	-6.12615	1.0039
ATF6B	0.0589734	6.18923	0.672265	0.50492	0.812382	-5.89933	1.04172
ATF7	0.0786546	6.38781	0.978072	0.333371	0.700021	-5.64812	1.05603
ATF7IP	0.1556	5.30919	1.4501	0.154103	0.532602	-5.12501	1.11388
ATF7IP2	-0.346582	1.90924	-1.50654	0.139054	0.514183	-4.59687	0.786445
ATG10	-0.039188	2.6078	-0.334986	0.739223	0.905413	-5.64783	0.973203
ATG12	0.0394389	5.72063	0.625113	0.535116	0.829369	-5.94129	1.02771
ATG13	-0.000574764	6.39067	-0.0062298	0.995057	0.99921	-6.10816	0.999602
ATG14	0.197901	5.37868	1.95443	0.0570052	0.384358	-4.34498	1.14703
ATG16L1	-0.0179661	5.0037	-0.25432	0.80043	0.932332	-6.0771	0.987624
ATG16L2	0.119905	5.10981	0.504559	0.616379	0.869208	-5.99194	1.08666
ATG2A	0.111037	5.67425	0.866205	0.391063	0.742294	-5.76847	1.08
ATG2B	0.211157	6.13976	2.24496	0.0298317	0.326814	-3.8019	1.15762
ATG3	-0.135529	5.40477	-2.12239	0.0394531	0.350337	-4.04182	0.910336
ATG4A	-0.189106	3.76623	-2.34864	0.0233856	0.316902	-3.47318	0.877149
ATG4B	0.0195213	5.74864	0.290304	0.772943	0.920154	-6.08965	1.01362
ATG4C	-0.0497446	3.31847	-0.33673	0.737917	0.904601	-5.79657	0.966107
ATG4D	-0.124968	3.53242	-1.32739	0.191205	0.576926	-5.0776	0.917025
ATG5	-0.0479672	4.97918	-0.712755	0.47975	0.800067	-5.86112	0.967298
ATG7	-0.0752453	4.53201	-0.880866	0.383163	0.736852	-5.6905	0.949181
ATG9A	-0.0382781	6.40284	-0.363429	0.71802	0.903707	-6.04334	0.973816
ATG9B	-0.187176	0.37809	-0.720267	0.475159	0.797248	-5.12023	0.878323
ATIC	-0.270237	5.50331	-2.3608	0.0227179	0.315202	-3.57825	0.829183
ATL1	0.607745	2.62776	3.51609	0.00102677	0.274467	-0.809225	1.52388
ATL2	-0.135296	5.37863	-1.18434	0.24262	0.622452	-5.45459	0.910483
ATL3	0.121121	7.55188	0.98287	0.33103	0.698339	-5.56858	1.08758
ATM	0.224139	5.82591	1.90771	0.0629493	0.399	-4.42778	1.16808
ATMIN	-0.153054	5.8787	-1.39761	0.169219	0.549791	-5.19787	0.899345
ATN1	0.0983971	8.64697	1.17756	0.245285	0.625008	-5.2943	1.07058
ATOH1	-0.438733	-6.56867	-1.47291	0.147872	0.525243	-4.42175	0.737782
ATOH7	0.182437	-2.98114	0.40636	0.686442	0.900273	-5.06152	1.1348
ATOH8	-0.049733	6.36639	-0.191972	0.848645	0.950475	-6.09162	0.966115
ATOX1	-0.218861	4.86201	-2.27694	0.0276921	0.323812	-3.72204	0.859244
ATP10A	-0.280053	5.24084	-0.77884	0.440231	0.775245	-5.82876	0.823561
ATP10B	0.526754	-3.03627	0.901156	0.372398	0.728631	-4.85052	1.44068
ATP10D	0.282535	4.82123	2.67845	0.0103516	0.28231	-2.87721	1.21633
ATP11A	0.0436068	5.43439	0.493753	0.623929	0.87147	-6.0101	1.03069
ATP11B	-0.0281634	5.95168	-0.266233	0.7913	0.927651	-6.09245	0.980668
ATP11C	0.166599	5.37609	1.74085	0.0886791	0.443275	-4.70064	1.12241
ATP12A	0.390293	-6.26379	1.07738	0.287164	0.660937	-4.7389	1.31066
ATP13A1	0.0300806	6.0212	0.431511	0.668198	0.893079	-6.03424	1.02107
ATP13A2	-0.220782	5.2297	-2.05748	0.0455786	0.361825	-4.15668	0.8581
ATP13A3	-0.358133	7.02615	-2.29713	0.0264131	0.318839	-3.6602	0.780174
ATP13A4	0.772291	-1.84396	1.9564	0.0567659	0.383894	-3.91714	1.70798
ATP13A5	1.09324	-5.69835	1.76286	0.084849	0.435706	-4.13448	2.13352
ATP1A1	0.0557973	8.04867	0.316251	0.753303	0.91228	-5.94351	1.03943
ATP1A2	0.0853657	7.19367	0.233407	0.816525	0.937592	-6.02905	1.06096
ATP1A3	0.017877	-1.4715	0.0407386	0.967688	0.98958	-5.13789	1.01247
ATP1A4	0.194898	-1.70774	0.785378	0.436429	0.773379	-4.92241	1.14464
ATP1B1	0.533956	3.47545	1.53348	0.132297	0.505591	-4.80242	1.44789
ATP1B2	0.868512	3.25711	2.47052	0.0174259	0.297693	-3.1727	1.82578
ATP1B3	-0.323118	6.6981	-2.03713	0.0476629	0.365798	-4.16811	0.79934
ATP1B4	0.956059	-5.11174	1.47293	0.147867	0.525243	-4.42023	1.94
ATP2A1	0.0539591	1.39279	0.158392	0.874871	0.959024	-5.46075	1.03811
ATP2A2	0.122128	7.8303	0.761343	0.450502	0.782514	-5.7313	1.08834
ATP2A3	0.435814	4.45223	1.65725	0.104563	0.46865	-4.76626	1.35267
ATP2B1	0.0888174	5.4204	0.779888	0.43962	0.775227	-5.83386	1.0635
ATP2B2	0.548366	-0.763318	1.16211	0.251436	0.62988	-4.72113	1.46243
ATP2B3	0.0474965	-3.22002	0.0968425	0.92329	0.974428	-5.11242	1.03347
ATP2B4	0.206585	8.23354	1.51868	0.135976	0.51127	-4.90178	1.15395
ATP2C1	-0.0488231	6.28615	-0.741507	0.462314	0.789911	-5.84775	0.966725
ATP2C2	0.357294	-2.17633	1.18976	0.240505	0.620405	-4.65848	1.28102
ATP4A	-1.29866	-2.76882	-2.49915	0.0162431	0.294889	-3.22829	0.406504
ATP4B	0.04757	-4.44527	0.0892797	0.929264	0.976143	-5.10979	1.03352
ATP5S	-0.157565	3.55298	-0.912207	0.366617	0.725138	-5.50812	0.896537
ATP6AP1	0.0631082	6.7674	0.80429	0.425542	0.767748	-5.77347	1.04471
ATP6AP1L	-0.188457	2.6167	-0.867275	0.390483	0.742294	-5.36142	0.877544
ATP6AP2	0.0686387	6.99186	0.881853	0.382635	0.73661	-5.69635	1.04873
ATP6V0A1	0.157473	5.82636	1.60141	0.116422	0.48608	-4.91585	1.11533
ATP6V0A2	-0.0333637	4.95328	-0.287953	0.774731	0.920984	-6.0646	0.977139
ATP6V0A4	0.88778	-5.02081	1.06043	0.294719	0.667826	-4.74782	1.85033
ATP6V0B	-0.114937	5.83563	-1.2101	0.232682	0.614162	-5.42763	0.923422
ATP6V0C	-0.0963359	7.07359	-0.781601	0.438623	0.774779	-5.77027	0.935406
ATP6V0D1	-0.128011	6.17508	-1.26363	0.212999	0.596462	-5.35559	0.915092
ATP6V0D2	1.77613	-3.27984	1.8254	0.0747141	0.420304	-4.06686	3.42507
ATP6V0E1	-0.122793	7.16773	-1.02414	0.31135	0.682115	-5.556	0.918408
ATP6V0E2	-0.0605286	4.16691	-0.397511	0.692907	0.9022	-5.93503	0.958913
ATP6V1A	-0.0371424	5.6936	-0.387027	0.700597	0.903707	-6.05819	0.974583
ATP6V1B1	0.360968	0.901407	1.05685	0.296333	0.66875	-4.94586	1.28429
ATP6V1B2	-0.0649125	6.96076	-0.560671	0.577858	0.849382	-5.9201	0.956003
ATP6V1C1	0.0456916	6.14688	0.580985	0.564206	0.841376	-5.95639	1.03218
ATP6V1C2	-0.37898	1.42353	-1.68404	0.0992355	0.460115	-4.31846	0.768981
ATP6V1D	-0.129239	4.9765	-1.25714	0.215316	0.598867	-5.35189	0.914314
ATP6V1E1	-0.0550264	7.00074	-0.518023	0.60703	0.864823	-5.93949	0.962577
ATP6V1E2	-0.262792	2.05275	-1.55052	0.12816	0.502319	-4.55903	0.833473
ATP6V1F	-0.010687	5.84966	-0.102037	0.91919	0.973499	-6.12416	0.99262
ATP6V1G1	-0.0690072	5.84235	-0.779482	0.439856	0.775245	-5.83523	0.953294
ATP6V1G2	0.486154	-0.323318	1.58621	0.119834	0.491427	-4.33974	1.40071
ATP6V1G3	0.0556475	-6.83281	0.340064	0.735422	0.903707	-5.08201	1.03933
ATP6V1H	-0.0206857	5.40288	-0.263532	0.793367	0.928184	-6.09398	0.985764
ATP7A	0.1151	4.09858	1.31684	0.194692	0.580119	-5.18353	1.08305
ATP7B	-0.0626915	3.64588	-0.476294	0.636215	0.877173	-5.80947	0.957476
ATP8A1	0.189019	4.88305	0.91446	0.365445	0.724152	-5.69685	1.13999
ATP8A2	-0.640361	-0.613358	-2.09058	0.042359	0.355912	-3.72369	0.641552
ATP8B1	0.33364	4.9281	1.62071	0.112204	0.4802	-4.86403	1.26019
ATP8B2	0.460085	6.23655	2.7152	0.00941871	0.28231	-2.80934	1.37562
ATP8B3	-0.237505	1.36732	-0.927638	0.358642	0.719407	-5.10819	0.848211
ATP8B4	0.122526	4.56703	0.44022	0.661926	0.890353	-5.97326	1.08864
ATP9A	-0.043101	7.05466	-0.213967	0.831558	0.944366	-6.04313	0.970567
ATP9B	0.0598978	4.725	0.800389	0.427774	0.768379	-5.77593	1.04239
ATPAF1	-0.300074	5.53599	-2.21987	0.0316117	0.330127	-3.85831	0.812211
ATPAF2	-0.275686	3.30174	-2.78289	0.00790029	0.27548	-2.51979	0.826058
ATR	-0.088161	4.96175	-1.05098	0.298991	0.671342	-5.57519	0.940721
ATRAID	-0.0571926	6.35556	-0.68227	0.498634	0.810175	-5.88485	0.961133
ATRIP	-0.0498253	3.28611	-0.642029	0.524176	0.823338	-5.65053	0.966053
ATRN	0.0289523	6.02473	0.383904	0.702894	0.903707	-6.05296	1.02027
ATRNL1	0.924138	-2.00334	1.83197	0.07371	0.417664	-4.05891	1.89755
ATRX	0.0481875	6.37843	0.582631	0.563107	0.841376	-5.94436	1.03397
ATXN1	0.260879	5.33849	1.65333	0.105362	0.470306	-4.83517	1.19821
ATXN10	-0.126174	6.11967	-1.7171	0.0929737	0.450208	-4.73301	0.916258
ATXN1L	0.0178043	6.3726	0.164683	0.869945	0.957997	-6.096	1.01242
ATXN2	0.112098	5.90196	1.20734	0.233733	0.61571	-5.42964	1.0808
ATXN2L	0.0950438	7.08179	1.24469	0.219815	0.601356	-5.32676	1.0681
ATXN3	-0.00928172	4.5974	-0.0918839	0.927206	0.97571	-6.06643	0.993587
ATXN3L	-0.0257163	-6.75909	-0.123476	0.902291	0.967664	-5.11489	0.982333
ATXN7	0.077225	5.45328	0.743131	0.46134	0.789475	-5.86158	1.05499
ATXN7L1	0.090888	3.92463	0.820443	0.416374	0.761127	-5.65011	1.06503
ATXN7L2	-0.0146075	2.67878	-0.133576	0.894345	0.965804	-5.70552	0.989926
ATXN7L3	-0.0391522	5.84347	-0.584254	0.562025	0.840936	-5.96358	0.973227
ATXN7L3B	0.0248727	5.91433	0.583204	0.562725	0.841376	-5.96282	1.01739
AUH	-0.0569236	4.10276	-0.685239	0.496777	0.80914	-5.77619	0.961312
AUNIP	-0.0794216	-1.34397	-0.317073	0.752684	0.911984	-5.11219	0.946437
AUP1	-0.151859	6.5771	-1.84763	0.0713663	0.413423	-4.50232	0.90009
AURKA	-0.207696	0.721954	-0.784357	0.437021	0.773664	-5.12329	0.865919
AURKAIP1	-0.325999	5.93476	-2.61068	0.0122983	0.28231	-3.04875	0.797746
AURKB	0.29647	-0.99425	0.56991	0.571629	0.845494	-5.05979	1.22814
AURKC	-0.166228	0.86872	-0.887445	0.379651	0.735156	-5.07282	0.891169
AUTS2	0.236321	5.12376	1.50084	0.140518	0.516674	-5.04784	1.17799
AVEN	-0.3577	3.8471	-2.24318	0.0299552	0.32712	-3.68778	0.780408
AVIL	-0.0762464	1.97986	-0.404467	0.687823	0.900273	-5.50242	0.948522
AVL9	0.023215	5.46496	0.367239	0.715196	0.903707	-6.06369	1.01622
AVP	-0.632564	-2.03354	-1.26817	0.211388	0.594865	-4.59797	0.645029
AVPI1	-0.0891476	5.03296	-0.476234	0.636258	0.877173	-6.00056	0.940078
AVPR1A	-0.000115651	2.93708	-0.000548869	0.999565	0.999738	-5.7685	0.99992
AVPR1B	-0.0637241	-5.6918	-0.144333	0.885894	0.963215	-5.1065	0.956791
AVPR2	0.00030098	3.50837	0.00130438	0.998965	0.999719	-5.88918	1.00021
AWAT1	0.184927	-5.81471	0.442944	0.659971	0.889396	-5.0493	1.13676
AWAT2	-0.510858	-5.68664	-1.06994	0.290464	0.663606	-4.74214	0.701805
AXDND1	-0.077006	-3.48183	-0.173779	0.862834	0.955957	-5.10485	0.948023
AXIN1	-0.00802602	5.0411	-0.088691	0.929729	0.976303	-6.10737	0.994452
AXIN2	0.393486	3.69886	1.67404	0.101197	0.462399	-4.63756	1.31356
AXL	0.127198	7.19902	0.758026	0.452465	0.784127	-5.77893	1.09217
AZGP1	-0.741654	5.81071	-1.74451	0.0880322	0.441511	-4.6972	0.598053
AZI2	-0.116115	4.86816	-0.683956	0.497579	0.80975	-5.87196	0.922669
AZIN1	-0.108907	6.84582	-0.81048	0.422014	0.765045	-5.76358	0.92729
AZU1	-0.891413	-1.88309	-1.6694	0.102118	0.464365	-4.23156	0.539086
B2M	0.0234923	10.9965	0.177786	0.859704	0.954995	-5.76304	1.01642
B3GALNT1	0.11398	2.83848	0.620747	0.53796	0.830655	-5.57096	1.08221
B3GALNT2	0.0798741	3.2058	0.518357	0.606799	0.8647	-5.70072	1.05693
B3GALT1	-0.144856	-0.721357	-0.485197	0.629937	0.874865	-5.11366	0.90447
B3GALT2	0.464299	-1.12739	1.35519	0.182253	0.566062	-4.54221	1.37965
B3GALT4	0.0457387	3.67728	0.341851	0.734086	0.903707	-5.86761	1.03221
B3GALT5	1.20242	-3.99113	1.61699	0.113008	0.481144	-4.28383	2.30125
B3GALT6	-0.237178	4.01905	-1.88665	0.0657985	0.405153	-4.34843	0.848403
B3GAT1	-0.0947828	-1.10666	-0.235429	0.814965	0.937218	-5.14459	0.936413
B3GAT2	0.205708	1.64786	0.979668	0.332591	0.699413	-5.10683	1.15325
B3GAT3	-0.0722067	4.90537	-0.829714	0.411167	0.756977	-5.76918	0.951182
B3GNT2	-0.0302697	4.62782	-0.274101	0.785286	0.925357	-6.0377	0.979237
B3GNT3	-0.0653302	-2.39374	-0.136617	0.891955	0.965279	-5.11079	0.955727
B3GNT4	0.234547	-2.26365	1.01811	0.314174	0.684777	-4.77929	1.17654
B3GNT5	-0.724633	2.72883	-2.6316	0.0116642	0.28231	-2.80211	0.605151
B3GNT6	-0.471508	-5.67466	-1.10037	0.277136	0.651623	-4.72109	0.72121
B3GNT7	0.338988	1.17086	1.07125	0.289882	0.662939	-4.96543	1.26487
B3GNT8	0.242366	1.10703	0.994972	0.325175	0.69385	-5.02112	1.18293
B3GNT9	0.401827	2.82453	1.82335	0.075028	0.421402	-4.27553	1.32118
B3GNTL1	-0.0607128	1.98804	-0.55804	0.579638	0.85029	-5.43936	0.95879
B4GALNT1	0.652669	1.04441	2.28211	0.0273596	0.322292	-3.40862	1.57207
B4GALNT2	0.401826	-6.44966	1.2535	0.216626	0.598869	-4.60907	1.32118
B4GALNT3	1.03319	-0.255346	2.61858	0.0120552	0.28231	-2.92151	2.04654
B4GALNT4	0.655307	-0.393058	1.48925	0.143535	0.519518	-4.4401	1.57495
B4GALT1	-0.0649338	7.02887	-0.418295	0.67776	0.896695	-5.98253	0.955989
B4GALT2	-0.231663	5.64989	-1.79041	0.0802511	0.429849	-4.62461	0.851653
B4GALT3	-0.24812	4.97303	-2.43054	0.0192091	0.303403	-3.41799	0.841993
B4GALT4	0.0993532	4.35376	1.55097	0.128053	0.502008	-4.90982	1.07129
B4GALT5	-0.0926008	6.22313	-0.654267	0.516336	0.819132	-5.9093	0.937831
B4GALT6	-0.116269	1.8272	-0.599404	0.551969	0.837148	-5.39055	0.922571
B4GALT7	-0.311737	4.68578	-2.26507	0.0284701	0.324985	-3.7328	0.805671
B9D1	-0.14154	1.88287	-0.810509	0.421997	0.765045	-5.27187	0.906551
B9D2	0.0887297	1.25411	0.540657	0.591463	0.856491	-5.32702	1.06343
BAALC	-0.276575	2.96543	-1.35102	0.183576	0.567194	-4.9481	0.825548
BAAT	-0.937198	-4.18615	-1.79147	0.0800769	0.42924	-4.104	0.522246
BABAM1	-0.14918	5.63627	-2.46756	0.0175527	0.298254	-3.35831	0.901763
BACE1	0.196847	5.86269	2.67991	0.0103129	0.28231	-2.8968	1.14619
BACE2	0.378692	5.97918	1.87634	0.0672318	0.407363	-4.47821	1.30016
BACH1	0.0594789	5.3339	0.397448	0.692953	0.9022	-6.04899	1.04209
BACH2	0.579084	2.59118	2.76565	0.00826392	0.27548	-2.5176	1.4939
BAD	-0.0342487	4.45388	-0.329068	0.743661	0.90764	-6.00058	0.97654
BAG1	-0.138262	5.96719	-1.13448	0.262718	0.639387	-5.50856	0.908613
BAG2	0.393259	3.92762	1.45001	0.154128	0.532602	-4.98858	1.31336
BAG3	-0.119948	6.49192	-0.581495	0.563866	0.841376	-5.93863	0.920221
BAG4	-0.297937	4.86959	-1.62307	0.111698	0.479507	-4.85639	0.813415
BAG5	-0.190125	6.06949	-1.04946	0.299682	0.671753	-5.59338	0.87653
BAG6	-0.0935851	7.71288	-1.4835	0.145049	0.521071	-4.98434	0.937191
BAHD1	0.0855698	4.87299	0.94946	0.347558	0.711285	-5.66496	1.06111
BAIAP2	0.123457	4.95044	0.716364	0.477541	0.798708	-5.8566	1.08934
BAIAP2L1	-0.112656	3.3222	-0.715271	0.478209	0.799122	-5.61168	0.924884
BAIAP2L2	-0.0944283	2.43529	-0.396102	0.693939	0.902508	-5.59261	0.936643
BAIAP3	-0.081539	2.97693	-0.313328	0.755507	0.912955	-5.73162	0.945049
BAK1	-0.144989	3.35732	-1.25484	0.216144	0.598869	-5.13116	0.904386
BAMBI	0.226507	1.78326	1.03491	0.306351	0.677424	-5.08001	1.17
BANF1	-0.194102	5.71561	-1.88305	0.0662958	0.406043	-4.47091	0.874117
BANF2	0.268561	-6.48652	0.9007	0.372638	0.728879	-4.85232	1.20461
BANK1	-0.52263	3.37431	-1.81416	0.0764559	0.423538	-4.37174	0.696102
BANP	0.256181	3.59736	1.74544	0.0878679	0.441147	-4.51352	1.19431
BAP1	-0.046356	6.55408	-0.681745	0.498963	0.810278	-5.87403	0.968379
BARD1	0.431483	2.76569	2.59279	0.0128654	0.284161	-2.88357	1.34862
BARHL1	-0.237961	-5.23597	-0.587028	0.560177	0.840373	-4.99926	0.847943
BARHL2	0.32294	-5.47858	0.64486	0.522356	0.822084	-4.97646	1.25088
BARX1	-0.242229	-4.31087	-0.50109	0.618799	0.870007	-5.03018	0.845438
BARX2	0.801077	-4.08442	1.00251	0.321562	0.691831	-4.78664	1.7424
BASP1	0.455694	5.23933	1.29821	0.200958	0.585434	-5.31701	1.37144
BATF	-0.256966	0.965448	-1.00887	0.318538	0.689645	-4.9927	0.836846
BATF2	0.0364873	0.696147	0.143964	0.886185	0.963416	-5.35688	1.02561
BATF3	-0.356359	1.80395	-1.29824	0.200949	0.585434	-4.82552	0.781134
BAX	-0.0503277	4.46201	-0.3728	0.711082	0.903707	-5.98684	0.965717
BAZ1A	-0.143145	5.58037	-1.40978	0.165615	0.545212	-5.18386	0.905543
BAZ1B	0.0460383	6.64472	0.710375	0.481209	0.800919	-5.84931	1.03243
BAZ2A	0.119074	7.5021	1.43137	0.159368	0.536489	-5.06782	1.08604
BAZ2B	0.0590506	5.3992	0.626953	0.533921	0.828662	-5.93699	1.04178
BBC3	0.418995	1.99232	1.71414	0.0935203	0.450849	-4.33201	1.337
BBIP1	0.101868	4.0907	1.2897	0.203872	0.58865	-5.215	1.07316
BBOX1	0.549297	-2.40694	0.888753	0.378955	0.734629	-4.85841	1.46337
BBS1	0.198904	4.92484	2.10673	0.0408608	0.351944	-4.05128	1.14783
BBS10	0.0128571	4.42261	0.0757911	0.939928	0.97975	-6.04593	1.00895
BBS12	0.177695	2.23431	1.2278	0.226033	0.606421	-4.96343	1.13108
BBS2	0.381953	5.4275	3.10322	0.00333551	0.274954	-1.90257	1.3031
BBS4	0.159508	4.29525	2.107	0.0408366	0.351944	-3.99594	1.11691
BBS5	0.0897066	3.85813	0.812961	0.420605	0.764483	-5.64433	1.06415
BBS7	0.233051	4.06861	2.2888	0.0269346	0.321735	-3.62606	1.17532
BBS9	0.0661233	3.87242	0.518684	0.606573	0.864645	-5.83206	1.0469
BBX	0.291539	5.76847	2.9705	0.00479608	0.27548	-2.22566	1.22395
BCAM	0.365634	7.39687	1.87661	0.0671937	0.407363	-4.40789	1.28845
BCAN	0.130327	-1.33537	0.368243	0.714453	0.903707	-5.10081	1.09454
BCAP29	-0.119356	6.10429	-1.15824	0.252998	0.631632	-5.47849	0.920599
BCAP31	-0.312231	8.35776	-1.49886	0.14103	0.517621	-4.92065	0.805395
BCAR1	-0.00155627	6.07575	-0.00890847	0.992932	0.998485	-6.12287	0.998922
BCAR3	-0.399084	5.49512	-2.69688	0.0098736	0.28231	-2.85946	0.758339
BCAS1	0.798089	-0.239741	1.35685	0.181728	0.565679	-4.57905	1.7388
BCAS2	-0.10787	4.64025	-1.48719	0.144077	0.520389	-5.03049	0.927957
BCAS3	0.0211003	4.72981	0.204973	0.838536	0.946942	-6.0646	1.01473
BCAS4	0.245099	0.314094	0.558515	0.579316	0.849887	-5.19267	1.18517
BCAT1	0.0744856	4.86715	0.325465	0.746367	0.909088	-6.04656	1.05299
BCAT2	-0.175189	5.04568	-0.937191	0.353762	0.71542	-5.68844	0.885651
BCCIP	-0.337601	4.99657	-3.3302	0.00176031	0.274467	-1.32268	0.791356
BCDIN3D	-0.0836266	0.832487	-0.664446	0.509862	0.814987	-5.20657	0.943682
BCHE	0.0972597	0.183465	0.240802	0.810824	0.93603	-5.27485	1.06974
BCKDHA	-0.149849	5.45009	-1.29524	0.201974	0.586891	-5.32695	0.901345
BCKDHB	-0.202854	4.76776	-1.21079	0.232422	0.613755	-5.38902	0.86883
BCKDK	-0.1515	5.56757	-1.49649	0.141644	0.517793	-5.06676	0.900314
BCL10	0.103683	3.77851	0.784832	0.436746	0.773588	-5.65114	1.07451
BCL11A	0.200686	-1.61446	0.505839	0.615488	0.868617	-5.04514	1.14924
BCL11B	0.130551	0.740051	0.471264	0.639774	0.878836	-5.28217	1.09471
BCL2	-0.170321	5.92584	-0.830285	0.410847	0.756678	-5.79434	0.888645
BCL2A1	-0.199695	1.12795	-0.391952	0.69698	0.903707	-5.36546	0.870735
BCL2L1	-0.202908	7.14172	-1.43196	0.159201	0.536435	-5.09029	0.868798
BCL2L10	-0.635497	-2.81406	-1.30497	0.198666	0.58346	-4.56688	0.643719
BCL2L11	0.259291	4.73564	2.20407	0.0327805	0.334187	-3.85472	1.19689
BCL2L12	-0.170244	2.64158	-1.62477	0.111333	0.479256	-4.54076	0.888693
BCL2L13	-0.0728888	6.30021	-0.369129	0.713797	0.903707	-6.04678	0.950732
BCL2L14	0.317704	-3.9988	0.828037	0.412105	0.758019	-4.88949	1.24635
BCL2L15	0.0814183	-2.72161	0.27023	0.788243	0.926035	-5.09224	1.05806
BCL2L2	-0.0161351	6.59239	-0.162266	0.871837	0.958616	-6.08351	0.988878
BCL2L2-PABPN1	-0.229317	-2.52074	-0.805736	0.424716	0.767136	-4.90381	0.853039
BCL3	0.0369933	5.55386	0.129637	0.897443	0.966678	-6.12242	1.02597
BCL6	-0.0381504	8.65413	-0.181673	0.856671	0.953884	-5.92849	0.973903
BCL6B	-0.483388	4.88059	-2.05314	0.0460163	0.362687	-4.14672	0.715296
BCL7A	0.288636	3.41704	1.77545	0.0827201	0.433097	-4.43901	1.22149
BCL7B	-0.154042	5.99293	-1.11285	0.2718	0.647619	-5.53083	0.898729
BCL7C	0.0684689	4.50853	0.740609	0.462853	0.789911	-5.79608	1.0486
BCL9	0.46604	4.23894	4.82178	1.72354e-05	0.235149	2.85266	1.38131
BCL9L	0.225405	6.39189	1.48376	0.14498	0.521071	-5.06411	1.16911
BCLAF1	-0.00655615	7.30737	-0.0794875	0.937004	0.978835	-6.0441	0.995466
BCO2	0.532475	1.09802	2.30482	0.0259401	0.318312	-3.37095	1.44641
BCOR	0.183514	5.10325	0.91153	0.366969	0.725138	-5.71456	1.13565
BCORL1	0.245413	4.54671	1.71501	0.0933597	0.450803	-4.68801	1.18543
BCR	-0.0633393	6.76624	-0.408363	0.684982	0.89974	-6.00434	0.957046
BCS1L	0.0207441	4.62753	0.197756	0.844144	0.948943	-6.05511	1.01448
BDH1	-0.513893	3.54793	-1.53466	0.132008	0.505387	-4.8129	0.70033
BDH2	0.286273	4.49949	1.86599	0.0686983	0.409278	-4.44019	1.21949
BDKRB1	0.129667	-0.844292	0.28772	0.774908	0.920984	-5.15694	1.09404
BDKRB2	-0.264604	3.70655	-0.657657	0.514175	0.817782	-5.72404	0.832427
BDNF	1.21694	-1.5494	2.11648	0.0399792	0.350829	-3.7188	2.32453
BDP1	0.0329397	5.46779	0.404257	0.687977	0.900273	-6.04988	1.02309
BEAN1	0.718455	0.0181662	2.55764	0.0140498	0.286559	-2.99743	1.64542
BECN1	-0.0398471	5.48576	-0.391516	0.6973	0.903707	-6.05514	0.972758
BEGAIN	-0.114194	0.153937	-0.394067	0.695429	0.903353	-5.2339	0.923898
BEND2	-0.0930619	-5.64957	-0.200784	0.84179	0.948085	-5.09992	0.937531
BEND3	-0.321129	1.32352	-2.09606	0.0418447	0.354866	-3.71331	0.800443
BEND4	1.34993	-1.71655	2.21485	0.031979	0.330817	-3.59829	2.54899
BEND5	0.436266	2.27982	2.55982	0.0139734	0.286559	-2.92532	1.3531
BEND6	0.669413	0.39779	1.39941	0.16868	0.549299	-4.57644	1.59043
BEND7	0.00222524	4.43173	0.0158567	0.98742	0.996206	-6.04981	1.00154
BEST1	-0.176009	4.34842	-0.967444	0.338595	0.704904	-5.59142	0.885148
BEST2	-0.290688	-3.5582	-0.62748	0.533578	0.828362	-4.9853	0.817512
BEST3	0.852445	-4.9519	1.30772	0.197741	0.582434	-4.56297	1.80556
BEST4	0.594741	-1.28568	2.21954	0.0316359	0.330127	-3.57712	1.5102
BET1	-0.129754	4.26088	-1.40677	0.1665	0.546531	-5.09358	0.913988
BET1L	0.085653	5.47229	1.05289	0.298124	0.670394	-5.59598	1.06117
BEX1	0.119526	-0.96957	0.342968	0.733251	0.903707	-5.13395	1.08638
BEX2	0.39031	-0.705175	0.963447	0.340574	0.705892	-4.87086	1.31067
BEX4	0.165685	4.30021	1.43481	0.158391	0.536129	-5.06203	1.1217
BEX5	0.67956	0.128607	2.69932	0.00981184	0.28231	-2.75102	1.60165
BFAR	-0.0491965	5.71753	-0.606539	0.547265	0.83444	-5.95237	0.966474
BFSP1	-0.0810079	0.580199	-0.319632	0.750756	0.911554	-5.30849	0.945397
BFSP2	0.0739426	-6.23951	0.192922	0.847905	0.950369	-5.10404	1.05259
BGLAP	0.0496937	0.790536	0.314155	0.754884	0.912683	-5.33876	1.03505
BGN	0.86389	7.42419	2.22841	0.0309961	0.329783	-3.77353	1.81994
BHLHA15	0.832962	-5.33396	1.65669	0.104677	0.468675	-4.24422	1.78134
BHLHA9	-0.267749	-5.33414	-0.627418	0.533619	0.828362	-4.98341	0.830615
BHLHB9	0.40355	2.18536	2.0227	0.0491901	0.366524	-3.88405	1.32276
BHLHE22	0.374647	1.02798	1.2898	0.203841	0.58865	-4.7436	1.29652
BHLHE23	-0.213881	-6.1118	-0.596466	0.553912	0.838391	-4.99847	0.862214
BHLHE40	0.134621	7.80887	0.343249	0.733041	0.903707	-5.95324	1.0978
BHLHE41	0.341334	4.92238	1.27205	0.210018	0.593541	-5.33048	1.26693
BHMT	-0.0781896	0.24654	-0.167753	0.867544	0.957312	-5.29421	0.947246
BHMT2	0.0749783	5.24645	0.383517	0.703178	0.903707	-6.05092	1.05335
BICC1	0.578648	5.24705	2.77516	0.00806145	0.27548	-2.67758	1.49345
BICD1	0.181444	3.67438	1.03293	0.307266	0.678085	-5.42178	1.13402
BICD2	0.0137802	5.79465	0.163525	0.870852	0.958376	-6.11709	1.0096
BID	-0.282262	4.41331	-2.34629	0.0235167	0.316902	-3.54839	0.822301
BIK	0.443819	-3.20974	1.19066	0.240154	0.62038	-4.65661	1.3602
BIN1	-0.146932	6.4244	-1.01929	0.313621	0.68441	-5.60704	0.903169
BIN2	-0.160885	3.02384	-0.650949	0.518455	0.820454	-5.59141	0.894476
BIN3	-0.404671	3.83592	-2.64178	0.0113666	0.28231	-2.87513	0.755409
BIRC2	0.00612952	5.76535	0.0930949	0.92625	0.975192	-6.12628	1.00426
BIRC3	0.474886	4.07762	2.00052	0.0516199	0.371907	-4.16133	1.38981
BIRC5	-0.284382	-2.07636	-0.448389	0.656067	0.887953	-5.05222	0.821093
BIRC6	0.0909817	6.66133	1.04092	0.303583	0.674406	-5.57233	1.06509
BIRC7	1.11867	-1.62538	1.43385	0.158662	0.536129	-4.46042	2.17147
BIRC8	-0.199058	-6.42994	-0.67023	0.506204	0.813121	-4.96981	0.871119
BIVM	-0.0286126	4.58531	-0.317274	0.752532	0.911984	-6.02037	0.980363
BLCAP	-0.339985	6.87235	-2.12911	0.0388628	0.348332	-3.99064	0.79005
BLID	0.0360379	-6.19395	0.0930656	0.926273	0.975192	-5.11317	1.02529
BLK	-0.909288	-1.92031	-2.32209	0.0249045	0.316902	-3.46287	0.532448
BLM	-0.24092	0.46083	-0.867945	0.39012	0.742076	-5.03891	0.846205
BLMH	-0.0297453	5.27111	-0.445766	0.657945	0.888355	-6.02694	0.979593
BLNK	0.0739095	0.883118	0.172689	0.863685	0.956456	-5.37994	1.05257
BLOC1S1	-0.183867	5.48294	-1.70633	0.0949768	0.452925	-4.75705	0.88034
BLOC1S2	-0.08726	4.53125	-0.762464	0.44984	0.782116	-5.78311	0.941309
BLOC1S3	0.06262	3.76834	0.726327	0.471474	0.795644	-5.69083	1.04436
BLOC1S4	-0.0896917	3.30468	-0.921726	0.361684	0.721218	-5.45208	0.939724
BLOC1S5	0.0678249	3.78172	0.648716	0.519884	0.821153	-5.74362	1.04814
BLOC1S6	-0.176701	6.0082	-1.54243	0.130111	0.504234	-4.99734	0.884724
BLVRA	-0.126273	5.17398	-1.80863	0.0773257	0.423894	-4.58466	0.916195
BLVRB	-0.203867	5.82878	-1.5609	0.125692	0.497497	-4.97477	0.86822
BLZF1	-0.0650499	4.21514	-0.903052	0.371402	0.727608	-5.62962	0.955912
BMF	0.631243	3.18615	2.26309	0.0286017	0.325351	-3.56825	1.5489
BMI1	-0.00678594	5.67284	-0.0737493	0.941543	0.980328	-6.12848	0.995307
BMP1	-0.263824	6.91572	-1.89249	0.0649974	0.404061	-4.4089	0.832878
BMP10	-0.149289	-5.56504	-0.265919	0.79154	0.927658	-5.08964	0.901695
BMP15	0.130701	-6.77881	0.658334	0.513744	0.81731	-4.97697	1.09483
BMP2	0.331331	4.2923	1.11507	0.270855	0.646997	-5.43929	1.25817
BMP2K	0.00495768	3.3	0.0384165	0.969529	0.989987	-5.84518	1.00344
BMP3	0.312828	-0.177764	0.424102	0.673552	0.89442	-5.18708	1.24214
BMP4	0.612154	3.9395	2.83584	0.00687436	0.27548	-2.45506	1.52854
BMP5	0.0267628	1.44418	0.0741615	0.941217	0.980258	-5.47751	1.01872
BMP6	-0.341327	4.96715	-1.67224	0.101555	0.463338	-4.78906	0.789315
BMP7	0.694014	-0.225119	1.47695	0.14679	0.52323	-4.45991	1.61778
BMP8A	-0.199351	-1.27896	-0.864069	0.392223	0.743285	-4.89761	0.870942
BMP8B	0.404802	1.539	1.61277	0.113924	0.48224	-4.42198	1.32391
BMPER	0.0324297	2.39016	0.0774936	0.938581	0.979163	-5.65135	1.02273
BMPR1A	0.165646	5.4515	1.2368	0.222704	0.604133	-5.39647	1.12167
BMPR1B	0.995177	0.221015	1.85442	0.0703694	0.412475	-4.03242	1.99333
BMPR2	0.0581522	7.04069	0.484918	0.630133	0.874919	-5.9527	1.04113
BMS1	-0.159624	5.67672	-2.34472	0.0236046	0.316902	-3.61166	0.895258
BMX	0.450891	3.27322	1.79407	0.0796551	0.428354	-4.3877	1.36688
BNC1	0.0146901	-1.72833	0.0383798	0.969558	0.989987	-5.12578	1.01023
BNC2	0.379226	4.74589	2.54125	0.0146352	0.288723	-3.17141	1.30064
BNIP1	-0.213427	2.83088	-1.94548	0.0581053	0.387072	-4.08199	0.862486
BNIP2	-0.00523967	6.72318	-0.0659796	0.947692	0.983072	-6.08584	0.996375
BNIP3	-0.180652	5.84413	-0.922942	0.361057	0.720774	-5.71816	0.882304
BNIP3L	-0.401361	8.1811	-1.80976	0.077147	0.42383	-4.47017	0.757143
BNIPL	0.288159	-1.50363	0.642246	0.524036	0.823338	-4.998	1.22108
BOC	0.586599	5.5404	2.80952	0.00736774	0.27548	-2.60379	1.5017
BOD1	-0.0392831	5.48808	-0.41587	0.679521	0.897037	-6.04564	0.973138
BOD1L1	0.184632	6.33283	2.47691	0.0171556	0.297693	-3.32474	1.13653
BOD1L2	-0.227828	-5.08646	-0.408269	0.685051	0.899765	-5.0573	0.85392
BOK	-0.55868	6.90424	-1.85224	0.0706886	0.413027	-4.47696	0.678923
BOLA1	-0.160182	3.23598	-1.6438	0.107326	0.472807	-4.60742	0.894912
BOLA2	-0.348609	-1.51462	-1.41215	0.164919	0.544083	-4.48175	0.785341
BOLA2B	-0.00911969	-2.12603	-0.0250323	0.980142	0.994271	-5.11812	0.993699
BOLA3	-0.340747	2.98536	-2.43433	0.0190333	0.302749	-3.21783	0.789632
BOLL	-0.211551	-5.70325	-0.454351	0.651803	0.885647	-5.04551	0.863608
BOP1	-0.336417	1.23056	-1.57437	0.122545	0.495057	-4.44241	0.792006
BORA	-0.0376708	1.50186	-0.283608	0.778037	0.921499	-5.45525	0.974227
BPGM	-0.00697943	3.88475	-0.0765609	0.939319	0.979461	-5.9597	0.995174
BPHL	-0.247396	3.47974	-1.53476	0.131983	0.505387	-4.80138	0.842416
BPI	0.049378	-2.07625	0.0847679	0.932829	0.97718	-5.11636	1.03482
BPIFA1	-0.331143	-6.44966	-1.04572	0.301385	0.672577	-4.76122	0.794907
BPIFA2	-0.392378	-6.50624	-1.30118	0.199952	0.584837	-4.57077	0.761873
BPIFA3	-0.0727327	-6.14281	-0.197551	0.844303	0.949005	-5.10279	0.950835
BPIFB1	-0.014016	-5.27667	-0.0265523	0.978937	0.993927	-5.11205	0.990332
BPIFB2	0.340254	-2.54965	0.428848	0.67012	0.893695	-5.05591	1.26598
BPIFB3	-0.0326465	-6.63137	-0.126024	0.900285	0.967511	-5.11381	0.977625
BPIFB4	1.00786	-4.38399	1.11579	0.270551	0.646997	-4.70979	2.01093
BPIFB6	-0.0808736	-6.53793	-0.345389	0.731443	0.903707	-5.07893	0.945485
BPIFC	0.0500325	-4.85156	0.0843619	0.93315	0.97718	-5.10968	1.03529
BPNT1	-0.212227	3.86291	-2.07348	0.0439961	0.359436	-4.00411	0.863203
BPTF	0.149609	6.38521	1.95282	0.0572019	0.384358	-4.33255	1.10927
BPY2	0.0556475	-6.83281	0.340064	0.735422	0.903707	-5.08201	1.03933
BPY2B	0.0556475	-6.83281	0.340064	0.735422	0.903707	-5.08201	1.03933
BPY2C	0.0556475	-6.83281	0.340064	0.735422	0.903707	-5.08201	1.03933
BRAF	0.0710295	5.37786	0.813393	0.42036	0.764367	-5.80716	1.05047
BRAP	-0.00803271	4.71901	-0.129234	0.89776	0.966678	-6.07578	0.994448
BRAT1	-0.0871171	5.75968	-0.979039	0.332898	0.699671	-5.66842	0.941402
BRCA1	-0.0293309	2.42419	-0.160624	0.873123	0.958669	-5.64933	0.979875
BRCA2	0.0111615	0.99851	0.0412073	0.967317	0.98958	-5.40858	1.00777
BRCC3	-0.0586735	3.95046	-0.821392	0.415839	0.760681	-5.65379	0.960147
BRD1	0.0809185	5.76307	1.16908	0.248648	0.627275	-5.47467	1.05769
BRD2	0.0153631	7.97987	0.272699	0.786357	0.925483	-5.96108	1.01071
BRD3	0.0953985	5.14869	1.26849	0.211273	0.594723	-5.34866	1.06836
BRD4	0.0682198	6.82398	0.776971	0.441322	0.775814	-5.79044	1.04842
BRD7	-0.0119252	5.70899	-0.199498	0.84279	0.948329	-6.11163	0.991768
BRD8	0.00334927	5.73442	0.0297365	0.976411	0.993126	-6.13043	1.00232
BRD9	-0.0618756	5.41769	-0.866294	0.391015	0.742294	-5.76555	0.958018
BRDT	-0.271199	-5.13015	-0.526565	0.601133	0.861182	-5.02114	0.828631
BRF1	-0.0810772	5.43467	-1.09962	0.277459	0.651854	-5.54742	0.945352
BRF2	-0.0309243	2.87282	-0.331393	0.741916	0.906952	-5.70421	0.978793
BRI3	0.0154307	6.77124	0.146166	0.884456	0.962431	-6.07442	1.01075
BRI3BP	-0.233777	2.96555	-1.15041	0.256173	0.633786	-5.17171	0.850406
BRICD5	0.0102319	2.53678	0.0708835	0.943811	0.981349	-5.68178	1.00712
BRINP1	1.81409	-2.96001	2.77206	0.00812697	0.27548	-2.83907	3.51638
BRINP2	0.163826	-1.83591	0.419537	0.67686	0.896146	-5.06433	1.12025
BRINP3	0.491703	-5.25456	0.758087	0.452429	0.784127	-4.92451	1.4061
BRIP1	-0.255592	0.234498	-0.766429	0.447502	0.780473	-5.07792	0.837643
BRIX1	-0.239397	4.16029	-1.87765	0.0670487	0.407232	-4.38172	0.847099
BRK1	-0.116139	7.16373	-1.66772	0.102453	0.464365	-4.7546	0.922653
BRMS1	-0.16615	4.936	-1.9785	0.0541355	0.377402	-4.28362	0.891218
BRMS1L	-0.0447226	3.42136	-0.368721	0.714099	0.903707	-5.80736	0.969476
BROX	0.0153051	5.2146	0.214851	0.830874	0.944181	-6.09846	1.01067
BRPF1	-0.0718404	4.91255	-1.23044	0.225052	0.605965	-5.37858	0.951424
BRPF3	-0.0763306	5.47804	-0.570175	0.571451	0.845494	-5.97171	0.948467
BRS3	-0.0505344	-6.05522	-0.12283	0.9028	0.967664	-5.11015	0.965579
BRSK1	0.405103	0.745411	1.18747	0.241394	0.62131	-4.81433	1.32418
BRSK2	-0.068201	0.703935	-0.244635	0.807873	0.934729	-5.34227	0.953827
BRWD1	0.150583	6.3278	1.58046	0.121145	0.492796	-4.93066	1.11002
BRWD3	0.25322	4.83231	2.04869	0.0464687	0.363251	-4.15141	1.19186
BSCL2	-0.1844	5.48752	-2.08434	0.0429504	0.356945	-4.11395	0.880015
BSDC1	-0.0303899	6.52661	-0.414383	0.680601	0.897346	-6.01705	0.979156
BSG	-0.31249	8.86616	-2.39494	0.0209338	0.31053	-3.37364	0.805251
BSN	0.255182	1.04176	1.16016	0.252221	0.630638	-4.87079	1.19349
BSND	-0.503812	-6.03393	-1.17383	0.246759	0.625055	-4.66895	0.705241
BSPH1	-0.363442	-6.48652	-1.24817	0.218551	0.600421	-4.61339	0.777308
BSPRY	1.01943	-0.901817	3.18962	0.00262198	0.274467	-2.0564	2.02712
BST1	0.0830446	3.79999	0.672813	0.504574	0.812255	-5.73197	1.05925
BST2	-0.179508	6.4411	-0.778456	0.440455	0.775245	-5.81267	0.883004
BSX	0.12606	-6.64851	0.584673	0.561745	0.840936	-5.00628	1.09131
BTAF1	0.234723	6.79915	1.72738	0.0910944	0.447146	-4.68426	1.17668
BTBD1	-0.119923	6.0658	-1.52289	0.134921	0.509713	-5.02323	0.920237
BTBD10	0.0331124	4.57695	0.450486	0.654566	0.887033	-5.97002	1.02322
BTBD11	0.124005	-0.40434	0.395853	0.694121	0.902508	-5.17204	1.08976
BTBD16	0.521753	-3.00283	0.920089	0.362529	0.721283	-4.83943	1.4357
BTBD17	-0.336265	-5.21783	-0.642755	0.523709	0.823286	-4.97691	0.792089
BTBD18	0.00522965	-2.82433	0.0154191	0.987767	0.99637	-5.11618	1.00363
BTBD19	0.227307	1.91949	1.19719	0.237626	0.618572	-4.94724	1.17065
BTBD2	0.0612662	6.51478	0.747122	0.458953	0.788502	-5.83147	1.04338
BTBD3	-0.0256094	4.66437	-0.276692	0.783308	0.924451	-6.04107	0.982406
BTBD6	-0.39374	6.84042	-1.97729	0.0542766	0.377953	-4.26696	0.761154
BTBD7	0.0499793	5.32246	0.600864	0.551005	0.836556	-5.95027	1.03525
BTBD8	0.520206	-0.726207	1.67914	0.100193	0.461422	-4.22802	1.43416
BTBD9	0.107525	4.086	1.19326	0.239146	0.620255	-5.32522	1.07738
BTC	0.339601	1.07538	1.55505	0.127077	0.500539	-4.45298	1.26541
BTD	-0.243885	4.82831	-1.5893	0.119133	0.489987	-4.90283	0.844468
BTF3	-0.109908	8.51027	-1.18277	0.243234	0.622663	-5.29828	0.926647
BTF3L4	-0.185924	5.47511	-1.77611	0.0826099	0.432797	-4.64641	0.879086
BTG1	-0.082989	8.10204	-0.663955	0.510174	0.81518	-5.77695	0.9441
BTG2	-0.105047	7.41481	-0.522252	0.604107	0.862876	-5.90803	0.929775
BTG3	-0.151086	4.48057	-1.17519	0.246223	0.625041	-5.39895	0.900572
BTG4	0.405577	-5.89036	0.910791	0.367354	0.725138	-4.8437	1.32462
BTK	0.0940973	3.19981	0.35631	0.723307	0.903707	-5.76543	1.0674
BTLA	-0.333368	-1.56827	-0.963009	0.340791	0.706042	-4.82495	0.793681
BTN1A1	-0.316371	-4.52758	-0.711749	0.480366	0.800501	-4.94662	0.803087
BTN2A1	0.105197	5.59055	0.889589	0.378511	0.734232	-5.74856	1.07564
BTN2A2	0.324809	3.57629	1.57984	0.121286	0.493011	-4.75468	1.2525
BTN3A1	0.147581	4.85486	0.517205	0.607596	0.865262	-5.96732	1.10771
BTN3A2	0.156713	4.78894	0.631155	0.531195	0.826816	-5.89817	1.11474
BTN3A3	0.0534029	4.34321	0.236823	0.81389	0.937213	-6.01052	1.03771
BTNL2	0.358918	-5.17849	0.784223	0.437099	0.773664	-4.91139	1.28246
BTNL3	-0.341126	-3.00592	-0.677108	0.501872	0.811402	-4.96533	0.789425
BTNL8	-0.524954	-1.15848	-1.46463	0.15011	0.527662	-4.44052	0.694981
BTNL9	-0.816945	9.04735	-2.79509	0.00765201	0.27548	-2.51987	0.567643
BTRC	0.100855	4.45431	1.04663	0.300969	0.67249	-5.52997	1.07241
BUB1	0.208895	-0.333075	0.494476	0.623423	0.87147	-5.14704	1.1558
BUB1B	-0.147876	-0.385916	-0.296751	0.768049	0.918421	-5.19908	0.902578
BUB3	-0.0423629	5.95899	-0.740165	0.46312	0.790003	-5.86144	0.971063
BUD13	-0.0268189	4.15443	-0.434598	0.665972	0.891736	-5.91826	0.981582
BUD31	-0.134239	4.42568	-1.81651	0.0760887	0.423432	-4.51389	0.91115
BVES	0.634998	2.77556	2.38024	0.0216861	0.311756	-3.30357	1.55294
BX004987.1	0.10702	-6.79595	0.588199	0.559398	0.839961	-5.00578	1.077
BYSL	-0.5458	3.5627	-3.13608	0.00304487	0.274467	-1.72699	0.685012
BZW1	-0.332531	6.8499	-2.1778	0.0348088	0.338218	-3.90024	0.794142
BZW2	-0.350818	5.27535	-2.81783	0.00720854	0.27548	-2.5804	0.784139
C10orf105	-0.0438164	-2.44796	-0.153393	0.878788	0.96074	-5.10901	0.970085
C10orf113	-0.0637362	-6.72481	-0.285521	0.776581	0.921269	-5.09268	0.956783
C10orf120	0.103134	-6.66823	0.474918	0.637188	0.877522	-5.04469	1.0741
C10orf53	-0.274776	-6.48393	-1.00404	0.320832	0.691402	-4.7888	0.826578
C10orf55	0.212652	-1.76312	0.565899	0.574329	0.84748	-5.01854	1.15882
C10orf62	0.167158	-4.37893	0.337887	0.737051	0.904176	-5.07495	1.12284
C10orf67	-0.0147516	-6.17096	-0.0394178	0.968735	0.989885	-5.11536	0.989827
C10orf71	1.59541	-2.80897	2.60138	0.0125902	0.283942	-3.08536	3.02181
C10orf82	-0.124475	-3.55852	-0.237204	0.813597	0.937082	-5.09603	0.917338
C10orf88	-0.0439126	3.16327	-0.579887	0.56494	0.842072	-5.66054	0.970021
C10orf90	-0.329542	-0.113268	-0.674237	0.503678	0.811895	-5.09158	0.795789
C10orf95	0.465909	-4.4408	1.17006	0.248258	0.626983	-4.67044	1.38119
C10orf99	0.286639	-5.47243	0.448781	0.655786	0.887953	-5.04648	1.2198
C11orf1	-0.143915	2.6092	-1.16936	0.248536	0.627275	-5.08726	0.90506
C11orf16	-0.138267	-5.37099	-0.314411	0.75469	0.912593	-5.07991	0.90861
C11orf21	0.187622	1.20819	0.509787	0.612741	0.867221	-5.33357	1.13888
C11orf24	-0.138736	5.34171	-1.09921	0.27764	0.652025	-5.54547	0.908315
C11orf40	-0.220245	-6.70509	-0.923794	0.360618	0.720291	-4.83975	0.85842
C11orf42	0.210742	-3.42595	0.542375	0.590289	0.855898	-5.01818	1.15728
C11orf45	0.459303	0.470293	1.07234	0.289396	0.662398	-4.88746	1.37488
C11orf49	0.0193004	3.59842	0.176709	0.860546	0.955408	-5.89267	1.01347
C11orf52	-0.00627398	1.46202	-0.0300728	0.976145	0.993029	-5.48242	0.995661
C11orf53	0.0441051	-1.30329	0.0805125	0.936194	0.978611	-5.14703	1.03104
C11orf54	-0.131399	4.69527	-1.23181	0.224545	0.605855	-5.35829	0.912946
C11orf58	-0.0994376	6.94632	-1.25518	0.21602	0.598869	-5.32324	0.933397
C11orf65	0.57677	-1.22269	1.99333	0.0524302	0.374502	-3.86317	1.49151
C11orf68	-0.0159253	5.3465	-0.18255	0.855987	0.953413	-6.11	0.989022
C11orf71	0.509707	-6.37336	1.84187	0.0722211	0.414693	-4.04842	1.42376
C11orf74	-0.0981789	2.9127	-1.2115	0.232151	0.613482	-5.09744	0.934211
C11orf80	0.259823	2.33605	1.31193	0.196327	0.581576	-4.88772	1.19733
C11orf86	-1.0607	-3.25177	-1.87392	0.0675728	0.407605	-4.01323	0.4794
C11orf87	-0.182008	-4.46468	-0.315046	0.754212	0.912534	-5.07972	0.881475
C11orf88	-0.475129	-4.28026	-0.953674	0.345444	0.70902	-4.81696	0.719402
C11orf91	-0.229474	-2.96134	-0.766047	0.447727	0.780473	-4.92358	0.852946
C11orf94	-0.348859	-5.36985	-0.850677	0.399542	0.746845	-4.87653	0.785205
C11orf95	0.164398	5.45245	1.12794	0.265441	0.642195	-5.51796	1.1207
C11orf96	0.0181992	7.0239	0.0482913	0.961702	0.98704	-6.06633	1.01269
C12orf10	0.00189539	4.79846	0.0245786	0.980502	0.994271	-6.09134	1.00131
C12orf29	-0.102779	3.36516	-1.00756	0.319159	0.69038	-5.38775	0.931237
C12orf4	-0.144774	4.03225	-1.55471	0.127159	0.500754	-4.86145	0.904521
C12orf40	-0.181696	-3.51069	-0.310512	0.757633	0.913844	-5.08293	0.881666
C12orf42	0.668741	-5.01872	1.52563	0.134238	0.508393	-4.37156	1.58968
C12orf43	-0.112627	3.9636	-1.39016	0.171453	0.553213	-5.07178	0.924902
C12orf45	-0.404662	2.51437	-3.40156	0.00143354	0.274467	-1.09168	0.755413
C12orf49	-0.141252	3.61152	-1.1893	0.24068	0.620405	-5.25027	0.906732
C12orf50	-0.00430508	-5.33815	-0.00982537	0.992205	0.99804	-5.11235	0.99702
C12orf54	0.247378	-2.69516	0.862388	0.393137	0.743587	-4.87297	1.18705
C12orf56	0.60407	-5.67305	1.21248	0.23178	0.612944	-4.63894	1.52
C12orf57	0.21715	4.89116	1.42547	0.161058	0.538172	-5.13541	1.16243
C12orf60	0.213933	0.0603906	0.96407	0.340265	0.705751	-4.93175	1.15985
C12orf65	0.196674	3.63688	1.94256	0.0584682	0.388067	-4.20099	1.14605
C12orf66	-0.134411	2.66049	-1.34775	0.184617	0.56876	-4.89935	0.911042
C12orf71	0.00169682	-2.88618	0.00556665	0.995584	0.99921	-5.11616	1.00118
C12orf73	0.0943401	2.35979	0.861189	0.39379	0.743587	-5.31797	1.06758
C12orf74	-0.0158992	-6.69275	-0.0576718	0.95427	0.98473	-5.11842	0.98904
C12orf75	1.02589	2.81644	2.33235	0.0243077	0.316902	-3.39824	2.03621
C12orf76	0.162279	3.10378	1.52779	0.133701	0.507475	-4.7472	1.11905
C14orf119	-0.234713	5.17628	-2.05029	0.0463058	0.362911	-4.16768	0.849854
C14orf132	0.886888	4.33	2.96039	0.00492886	0.27548	-2.19798	1.84918
C14orf177	-0.0146661	-6.56024	-0.0495978	0.960667	0.986876	-5.11777	0.989886
C14orf178	0.282226	-5.69096	0.612791	0.54316	0.833199	-4.99017	1.21607
C14orf180	-0.726447	5.37968	-1.70587	0.0950618	0.452925	-4.75561	0.604391
C14orf28	0.183164	3.17637	1.56619	0.124447	0.496322	-4.70712	1.13537
C14orf39	-0.488509	-0.692738	-1.07413	0.288604	0.662184	-4.79318	0.712761
C14orf93	0.232282	3.2975	1.988	0.053038	0.375306	-4.07513	1.17469
C15orf39	0.0162927	5.51866	0.111603	0.911645	0.970981	-6.12419	1.01136
C15orf40	-0.0396423	3.71895	-0.382339	0.704045	0.903707	-5.8617	0.972896
C15orf41	0.393321	2.62997	1.90889	0.0627935	0.399	-4.11531	1.31341
C15orf48	-0.105664	-1.99398	-0.285068	0.776926	0.921269	-5.09278	0.929377
C15orf53	-0.0711438	-6.34424	-0.194095	0.846993	0.949924	-5.10462	0.951883
C15orf59	0.462474	2.90494	2.02942	0.0484737	0.366321	-3.95161	1.3779
C15orf61	0.120407	3.01753	0.630714	0.53148	0.826978	-5.60204	1.08704
C15orf62	0.0367881	1.67084	0.266269	0.791273	0.927651	-5.48789	1.02583
C15orf65	-0.0361846	-0.664643	-0.150005	0.881444	0.962107	-5.19503	0.975231
C16orf45	0.315807	5.62003	2.2589	0.0288817	0.325693	-3.78259	1.24471
C16orf46	-0.130801	0.856771	-0.809665	0.422478	0.765403	-5.124	0.913324
C16orf54	-0.322963	-0.0167718	-0.926448	0.359253	0.719661	-4.95109	0.799426
C16orf58	0.000165671	5.65654	0.00180844	0.998565	0.999719	-6.13111	1.00011
C16orf70	0.0260442	4.25427	0.346699	0.730465	0.903707	-5.96679	1.01822
C16orf71	-0.166484	-0.976258	-0.666305	0.508685	0.814672	-5.01984	0.891011
C16orf72	0.114027	5.81409	1.25501	0.216081	0.598869	-5.37586	1.08225
C16orf74	-0.187644	1.00044	-0.617068	0.540361	0.83204	-5.25386	0.878038
C16orf78	-0.0675338	-5.6586	-0.167783	0.86752	0.957312	-5.10397	0.954268
C16orf86	-0.0142948	2.51381	-0.10807	0.91443	0.971828	-5.67403	0.990141
C16orf87	-0.00526263	2.56758	-0.0489771	0.961159	0.987015	-5.68936	0.996359
C16orf89	0.410522	0.291649	0.915842	0.364728	0.723308	-4.98825	1.32917
C16orf90	0.188517	-5.72127	0.436682	0.664471	0.89103	-5.05074	1.13959
C16orf91	-0.222384	2.66189	-1.63285	0.109618	0.47652	-4.53254	0.857148
C16orf92	0.268201	-6.35622	0.822955	0.414959	0.759814	-4.89508	1.20431
C16orf95	-0.300069	1.25311	-1.55441	0.12723	0.50082	-4.46888	0.812213
C16orf96	1.06648	-2.41067	2.47488	0.017241	0.297693	-3.26104	2.09432
C17orf100	0.904713	-5.8243	2.64728	0.0112089	0.28231	-3.02328	1.87217
C17orf107	0.0748583	-0.649611	0.220887	0.826199	0.942344	-5.18702	1.05326
C17orf47	-0.211301	-5.08447	-0.483987	0.630788	0.875491	-5.03517	0.863758
C17orf49	-0.0834044	2.41656	-0.574631	0.568459	0.844094	-5.51128	0.943828
C17orf50	0.300157	-4.05819	0.624226	0.535693	0.829584	-4.98543	1.23128
C17orf51	0.0269088	4.11133	0.22366	0.824054	0.941159	-5.97795	1.01883
C17orf53	-0.280185	1.49446	-0.979525	0.332661	0.699413	-5.08495	0.823485
C17orf58	-0.307558	3.3003	-1.42025	0.162561	0.540531	-4.92177	0.808008
C17orf64	0.380622	-3.10395	0.887102	0.379833	0.735156	-4.85853	1.3019
C17orf67	0.484964	0.560263	2.20262	0.0328899	0.334209	-3.53826	1.39955
C17orf75	0.0366286	2.74148	0.412658	0.681855	0.897986	-5.64904	1.02571
C17orf78	1.14828	-5.35515	2.40321	0.0205211	0.308512	-3.36295	2.2165
C17orf80	0.00124846	4.06537	0.0125405	0.990051	0.997405	-5.99429	1.00087
C17orf97	-0.401201	0.728214	-1.43211	0.159159	0.536434	-4.56634	0.757228
C17orf98	-0.710258	-5.26327	-1.71327	0.0936806	0.450911	-4.18649	0.611211
C17orf99	-0.523822	-4.06642	-0.943705	0.350459	0.712758	-4.82335	0.695527
C18orf21	-0.130188	3.37719	-1.42328	0.161687	0.538956	-4.93142	0.913712
C18orf25	0.0173539	5.1287	0.239449	0.811866	0.936296	-6.08866	1.0121
C18orf32	-0.039977	5.24551	-0.481019	0.632879	0.876863	-6.00999	0.97267
C18orf54	0.345706	1.90326	1.78149	0.0817156	0.431628	-4.22724	1.27077
C18orf63	-0.667598	-5.85889	-1.3168	0.194704	0.580119	-4.5563	0.629554
C19orf12	-0.497544	6.35708	-1.61801	0.112786	0.480945	-4.8742	0.708311
C19orf18	0.0729079	0.335944	0.388555	0.699474	0.903707	-5.25773	1.05183
C19orf24	-0.250374	4.52497	-1.77163	0.0833621	0.433097	-4.59673	0.840678
C19orf25	-0.0480077	3.99957	-0.496523	0.62199	0.871093	-5.86521	0.967271
C19orf33	-0.568565	0.231055	-1.36562	0.17898	0.562579	-4.5994	0.674287
C19orf38	-0.126407	0.26341	-0.415253	0.679969	0.897212	-5.24047	0.91611
C19orf44	0.198819	2.60877	1.3066	0.198119	0.582515	-4.93831	1.14776
C19orf47	-0.0201857	3.55701	-0.262818	0.793914	0.928184	-5.8664	0.986106
C19orf48	-0.137618	3.97934	-0.909986	0.367774	0.725557	-5.58653	0.909019
C19orf53	-0.0813634	5.45901	-0.974637	0.335053	0.701546	-5.67122	0.945164
C19orf54	-0.0576733	3.8999	-0.545921	0.58787	0.854969	-5.82322	0.960812
C19orf57	0.293206	0.736402	1.43641	0.157939	0.536129	-4.56229	1.22536
C19orf66	0.0858714	4.48912	0.684027	0.497535	0.80975	-5.83227	1.06133
C19orf67	0.842383	-4.2128	1.68327	0.099385	0.460209	-4.2173	1.79301
C19orf70	-0.197424	5.17107	-1.74678	0.0876333	0.440963	-4.68415	0.872107
C19orf71	0.260581	0.891442	1.30663	0.198107	0.582515	-4.71299	1.19796
C19orf73	-0.245327	-1.33757	-0.958852	0.342858	0.707775	-4.83702	0.843625
C19orf81	-0.224814	-4.53409	-0.421172	0.675674	0.895418	-5.05398	0.855705
C1D	-0.115795	3.99857	-1.13574	0.262196	0.639387	-5.37384	0.922874
C1GALT1	-0.0813871	4.95623	-0.557335	0.580115	0.850433	-5.95458	0.945148
C1GALT1C1	-0.147021	4.16261	-1.35857	0.181189	0.564908	-5.14128	0.903113
C1orf100	0.152249	-4.67878	0.315698	0.75372	0.912394	-5.07933	1.1113
C1orf105	-0.253069	-6.00992	-0.646371	0.521387	0.821796	-4.97766	0.83911
C1orf109	-0.0636504	4.05425	-0.691587	0.492819	0.806528	-5.76421	0.95684
C1orf112	0.0876375	2.22081	0.804111	0.425644	0.767748	-5.33454	1.06263
C1orf115	-0.348836	6.15964	-1.75058	0.0869689	0.439928	-4.6788	0.785217
C1orf116	0.452504	-1.92144	0.828096	0.412073	0.758019	-4.8952	1.36841
C1orf122	-0.258149	4.86679	-1.71743	0.0929115	0.450167	-4.71255	0.83616
C1orf123	-0.0440925	5.58425	-0.691154	0.493089	0.806599	-5.89922	0.9699
C1orf127	0.663505	-1.80519	1.02657	0.310218	0.681274	-4.77763	1.58393
C1orf131	-0.0689145	3.65568	-1.11212	0.272109	0.647701	-5.33988	0.953355
C1orf141	-0.673351	-5.80857	-1.35541	0.182185	0.566041	-4.52394	0.627049
C1orf146	0.371797	-5.22439	0.825952	0.413275	0.759171	-4.88973	1.29396
C1orf158	0.480387	-5.55561	1.05782	0.295893	0.668317	-4.75009	1.39512
C1orf159	-0.0342256	3.96012	-0.280189	0.780642	0.922792	-5.93847	0.976556
C1orf162	-0.311497	4.65414	-1.1571	0.253458	0.632084	-5.43793	0.805805
C1orf167	0.174419	-4.59807	0.406026	0.686685	0.900273	-5.05801	1.12851
C1orf174	-0.127967	4.32535	-1.30104	0.199998	0.584837	-5.23426	0.91512
C1orf185	-0.288823	-5.5288	-0.614206	0.542233	0.833043	-4.98914	0.818569
C1orf189	-0.237516	-4.1854	-0.587401	0.559928	0.840168	-4.99972	0.848205
C1orf194	-0.641121	-5.36699	-1.49785	0.141292	0.517627	-4.39748	0.641215
C1orf198	0.257119	6.79251	1.35391	0.182659	0.566525	-5.21272	1.19509
C1orf21	0.0510821	6.43381	0.352614	0.726056	0.903707	-6.04535	1.03604
C1orf210	0.325532	-3.44177	0.602541	0.549898	0.83608	-4.9956	1.25313
C1orf216	0.0729933	4.4889	0.719641	0.475541	0.79758	-5.80833	1.0519
C1orf226	0.189566	2.59813	0.728599	0.470096	0.794843	-5.45694	1.14042
C1orf35	0.165285	4.10421	1.5179	0.136171	0.51162	-4.92314	1.12139
C1orf43	-0.162459	7.27053	-1.58655	0.119756	0.491427	-4.86816	0.893501
C1orf50	-0.0474163	2.95212	-0.512215	0.611055	0.866231	-5.65072	0.967668
C1orf52	0.0371169	4.35941	0.444263	0.659024	0.889128	-5.94478	1.02606
C1orf53	-0.439553	-0.65707	-1.59515	0.117818	0.488175	-4.32075	0.737363
C1orf54	0.253978	2.53322	1.02478	0.311051	0.682113	-5.21347	1.19249
C1orf56	0.0671582	2.46365	0.482433	0.631883	0.876152	-5.5642	1.04765
C1orf61	-0.107026	-2.41124	-0.187506	0.852124	0.951774	-5.10528	0.9285
C1orf68	0.353106	-3.90926	0.627463	0.53359	0.828362	-4.98445	1.27731
C1orf74	-0.0265036	0.295706	-0.159034	0.874367	0.959024	-5.30154	0.981797
C1orf87	-0.0553607	-4.71646	-0.100293	0.920566	0.973747	-5.10878	0.962354
C1orf94	0.213531	-5.96697	0.49782	0.621083	0.870876	-5.03306	1.15952
C1QA	-0.0544405	6.24664	-0.160675	0.873083	0.958669	-6.10301	0.962968
C1QB	-0.246487	6.59701	-0.654195	0.516381	0.819132	-5.88911	0.842946
C1QBP	-0.406858	5.48412	-2.98256	0.00464196	0.27548	-2.19633	0.754264
C1QC	-0.182471	6.4754	-0.522035	0.604257	0.863022	-5.97125	0.881192
C1QL1	0.521645	-2.01795	1.09569	0.279161	0.653456	-4.72786	1.43559
C1QL2	0.16846	-5.85708	0.331528	0.741815	0.906952	-5.07785	1.12386
C1QL3	-0.262803	-0.364802	-0.651672	0.517993	0.82024	-5.07806	0.833467
C1QL4	0.269458	-4.85944	0.600156	0.551472	0.836857	-4.994	1.20535
C1QTNF1	-0.400758	8.79669	-1.20073	0.236263	0.617395	-5.25844	0.75746
C1QTNF2	0.807159	1.69375	2.06414	0.0449138	0.360651	-3.78109	1.74976
C1QTNF3	0.656734	2.3851	2.10051	0.0414318	0.353574	-3.77306	1.57651
C1QTNF4	0.78313	0.42353	2.03298	0.0480974	0.366321	-3.79063	1.72086
C1QTNF5	0.148156	5.32516	0.718811	0.476047	0.79789	-5.87527	1.10815
C1QTNF6	0.378635	3.23638	1.11412	0.271258	0.647452	-5.2599	1.30011
C1QTNF7	0.661994	4.26743	2.57263	0.013533	0.286559	-3.06579	1.58227
C1QTNF8	-0.050155	-6.06457	-0.124348	0.901605	0.967637	-5.11008	0.965833
C1QTNF9	-0.118629	-0.435625	-0.254649	0.800177	0.932156	-5.20247	0.921063
C1QTNF9B	-0.13374	-4.36578	-0.309356	0.758507	0.914326	-5.08105	0.911466
C1R	0.383178	8.83835	1.98698	0.0531544	0.37543	-4.13586	1.30421
C1RL	0.0608877	6.51976	0.4184	0.677684	0.896695	-6.01584	1.04311
C1S	0.386185	9.70556	2.66257	0.0107806	0.28231	-2.78788	1.30693
C2	0.41711	4.90515	1.22832	0.225837	0.606252	-5.38048	1.33525
C20orf141	-2.14431	-3.61306	-3.55105	0.000926401	0.274196	-1.61693	0.226202
C20orf144	0.0969162	-6.53793	0.343688	0.732713	0.903707	-5.07931	1.06948
C20orf173	0.0556475	-6.83281	0.340064	0.735422	0.903707	-5.08201	1.03933
C20orf194	0.100231	5.99272	1.47493	0.14733	0.52426	-5.09195	1.07194
C20orf202	0.5048	-0.984266	1.66011	0.103983	0.467614	-4.2455	1.41893
C20orf203	0.967039	-0.714199	2.64688	0.0112201	0.28231	-2.92078	1.95482
C20orf27	-0.390314	5.87981	-2.09788	0.0416756	0.354563	-4.08808	0.762963
C20orf85	0.0823713	-6.42381	0.247056	0.806011	0.934135	-5.09746	1.05876
C20orf96	0.277505	2.99284	1.56752	0.124137	0.49616	-4.67485	1.2121
C21orf2	-0.0707733	3.79568	-0.607734	0.546479	0.834088	-5.77054	0.952127
C21orf58	0.13334	1.91687	0.607947	0.546339	0.83407	-5.40153	1.09683
C21orf62	0.570819	-3.24913	1.31022	0.1969	0.581799	-4.56225	1.48537
C21orf91	-0.0894175	4.00061	-0.694841	0.490798	0.805669	-5.75309	0.939902
C22orf15	-0.909706	-4.55408	-2.05827	0.0454994	0.361704	-3.80101	0.532294
C22orf23	0.282277	1.41641	2.05244	0.0460869	0.362687	-3.78544	1.21611
C22orf31	1.14499	-4.79076	2.07275	0.0440673	0.359436	-3.78373	2.21144
C22orf39	-0.0269652	5.14045	-0.314695	0.754476	0.912575	-6.06904	0.981483
C22orf42	0.162727	-6.04263	0.413143	0.681503	0.897811	-5.05878	1.1194
C22orf46	-0.0415878	3.91989	-0.412276	0.682133	0.898254	-5.88766	0.971585
C2CD2	-0.194699	7.11662	-0.79322	0.431894	0.77164	-5.75859	0.873755
C2CD2L	-0.000526516	4.10287	-0.00468941	0.99628	0.999283	-6.00058	0.999635
C2CD3	0.00706392	4.52992	0.0787974	0.93755	0.978954	-6.05948	1.00491
C2CD4A	0.963645	-3.85033	1.51731	0.13632	0.51162	-4.37965	1.95023
C2CD4B	0.726938	1.96762	0.99624	0.324565	0.69374	-5.14181	1.65512
C2CD4C	-0.410155	2.24575	-1.37284	0.176739	0.559313	-4.80396	0.752542
C2CD4D	-0.162081	-2.80636	-0.414015	0.680869	0.897346	-5.0597	0.893735
C2CD5	0.19662	5.39052	2.02697	0.0487335	0.366321	-4.21658	1.14601
C2orf15	0.171053	-4.02942	0.511025	0.611881	0.866741	-5.02748	1.12588
C2orf16	-0.0564316	-0.0192335	-0.219574	0.827216	0.942806	-5.25432	0.96164
C2orf40	0.688507	3.53835	2.17618	0.0349379	0.338218	-3.77417	1.61161
C2orf42	0.0369004	3.15637	0.375092	0.709389	0.903707	-5.74986	1.02591
C2orf49	0.0135018	4.5168	0.201174	0.841487	0.948014	-6.04129	1.0094
C2orf50	0.0577717	-3.26338	0.123093	0.902593	0.967664	-5.11041	1.04086
C2orf54	0.464563	-3.98922	0.778895	0.440198	0.775245	-4.91506	1.3799
C2orf66	-0.157041	-3.0298	-0.352842	0.725887	0.903707	-5.07482	0.896863
C2orf68	0.0162091	4.60939	0.159476	0.874021	0.959024	-6.05962	1.0113
C2orf69	-0.156173	4.20342	-1.30107	0.199987	0.584837	-5.21774	0.897402
C2orf70	-0.4416	-5.33696	-1.01647	0.314948	0.685795	-4.77715	0.736318
C2orf71	-0.735781	-2.59474	-1.56021	0.125853	0.497862	-4.33944	0.600493
C2orf72	-0.232437	-2.14114	-0.51497	0.609144	0.865812	-5.0306	0.851196
C2orf73	0.281252	-2.5746	0.828296	0.41196	0.757904	-4.89177	1.21525
C2orf74	0.0556475	-6.83281	0.340064	0.735422	0.903707	-5.08201	1.03933
C2orf76	-0.131754	2.61586	-1.25703	0.215357	0.598867	-4.99506	0.912721
C2orf78	0.087421	-6.4128	0.315849	0.753606	0.912394	-5.08458	1.06247
C2orf80	-0.1333	-6.25338	-0.350497	0.727633	0.903707	-5.07586	0.911744
C2orf81	0.375885	1.53578	1.5613	0.125598	0.497402	-4.48703	1.29764
C2orf83	0.590568	-4.86834	1.07873	0.286568	0.66081	-4.73535	1.50584
C2orf88	-0.00366313	2.47939	-0.0205178	0.983723	0.995035	-5.67204	0.997464
C2orf91	0.896121	-4.34601	1.87257	0.0677629	0.407682	-4.01541	1.86105
C3	0.565812	9.52711	2.21493	0.0319736	0.330817	-3.6917	1.48022
C3AR1	-0.15227	4.34249	-0.522545	0.603905	0.862876	-5.90609	0.899834
C3orf14	-0.12783	2.04552	-0.710919	0.480875	0.80083	-5.36505	0.915207
C3orf18	0.473577	3.61622	3.67832	0.000634691	0.235149	-0.368979	1.38855
C3orf20	-0.869869	-3.59187	-2.12722	0.0390278	0.348332	-3.71612	0.547196
C3orf22	0.0746051	-6.16749	0.1707	0.86524	0.956784	-5.10622	1.05307
C3orf30	-0.570689	-6.27896	-1.75393	0.0863854	0.43833	-4.14365	0.673295
C3orf33	0.0187407	1.87632	0.161754	0.872238	0.958616	-5.54361	1.01307
C3orf36	-0.45648	-3.87447	-0.733091	0.46738	0.79299	-4.93776	0.728762
C3orf38	-0.0539036	3.6664	-0.712709	0.479778	0.800067	-5.68102	0.963326
C3orf49	0.270186	-3.89311	0.637012	0.527408	0.824779	-4.98055	1.20596
C3orf52	-0.442201	0.624371	-1.53611	0.131651	0.505272	-4.44211	0.736011
C3orf56	-0.302765	-6.09268	-0.643287	0.523367	0.82282	-4.97939	0.810697
C3orf58	0.249414	4.02661	1.57401	0.122628	0.495168	-4.83327	1.18872
C3orf62	-0.0740412	3.70644	-0.744272	0.460657	0.789282	-5.66692	0.949973
C3orf67	0.491044	-0.321939	1.53971	0.130771	0.504681	-4.38997	1.40546
C3orf70	0.439407	2.85619	1.40861	0.165958	0.545836	-4.85907	1.35605
C3orf80	0.162526	-0.227418	0.494287	0.623555	0.87147	-5.15791	1.11925
C3orf84	-0.109077	-6.03615	-0.280922	0.780083	0.922549	-5.08897	0.927181
C4A	0.341691	1.39564	1.03333	0.307081	0.678085	-5.0267	1.26724
C4B	0.423954	0.974448	1.0601	0.294867	0.667871	-4.95152	1.3416
C4BPA	-0.203774	-4.01764	-0.470423	0.64037	0.879199	-5.04056	0.868277
C4BPB	-0.379537	-1.21635	-0.584625	0.561777	0.840936	-5.03815	0.768684
C4orf17	-0.688261	-5.99537	-1.84393	0.0719147	0.4143	-4.04664	0.620601
C4orf19	-0.919306	1.36932	-2.72759	0.00912205	0.28231	-2.60693	0.528763
C4orf3	-0.000610286	7.36092	-0.00744158	0.994096	0.998922	-6.04323	0.999577
C4orf33	-0.0768339	2.58333	-0.561221	0.577486	0.84904	-5.55114	0.948136
C4orf36	0.236709	1.45509	1.99116	0.0526767	0.374654	-3.88199	1.1783
C4orf45	0.13207	-3.41012	0.329022	0.743696	0.90764	-5.0793	1.09586
C4orf46	-0.0293053	2.50158	-0.266149	0.791364	0.927651	-5.64477	0.979892
C4orf47	0.252138	-1.92091	0.744222	0.460687	0.789282	-4.93826	1.19097
C4orf48	-0.449002	0.701464	-1.42984	0.159805	0.536489	-4.5667	0.732549
C4orf50	-0.626588	-5.90931	-1.45246	0.153447	0.531432	-4.43929	0.647706
C4orf51	-0.231228	-6.65109	-0.918511	0.363345	0.721956	-4.84263	0.85191
C5	0.129742	3.62068	0.632622	0.530245	0.826633	-5.7229	1.0941
C5AR1	-0.317519	4.68079	-0.966086	0.339266	0.70531	-5.63217	0.802448
C5AR2	-0.0630653	2.56599	-0.194667	0.846547	0.949885	-5.67292	0.957228
C5orf15	-0.118852	5.40216	-1.36146	0.180279	0.564137	-5.24352	0.92092
C5orf22	-0.0878377	4.21212	-0.925454	0.359764	0.719773	-5.60983	0.940932
C5orf24	-0.0530498	5.78126	-0.47629	0.636218	0.877173	-6.02	0.963897
C5orf30	-0.442374	4.3411	-1.36289	0.179834	0.563754	-5.15998	0.735923
C5orf34	0.178594	0.763235	0.910935	0.367279	0.725138	-5.04342	1.13178
C5orf38	0.573459	2.638	3.16417	0.00281559	0.274467	-1.64056	1.48809
C5orf46	0.8088	-5.11086	1.15256	0.255297	0.632908	-4.68313	1.75175
C5orf47	-0.316167	-5.3355	-0.64338	0.523307	0.82282	-4.97681	0.803201
C5orf49	-0.510834	-2.38193	-1.12492	0.266706	0.643046	-4.70576	0.701817
C5orf51	0.0888647	5.23248	0.909604	0.367973	0.725571	-5.72261	1.06353
C5orf52	-0.0498591	-6.35009	-0.149367	0.881945	0.962137	-5.10975	0.966031
C5orf58	0.256039	0.60825	1.14069	0.260151	0.637891	-4.84293	1.1942
C5orf60	0.28979	-5.49467	0.631965	0.53067	0.826746	-4.98185	1.22246
C5orf63	-0.209245	1.95872	-1.18602	0.241963	0.621987	-4.96424	0.86499
C6	0.25465	4.27718	0.592037	0.556847	0.839654	-5.85974	1.19305
C6orf10	-0.0247306	-6.01162	-0.061038	0.951605	0.983918	-5.11365	0.983004
C6orf106	-0.112668	7.26613	-0.687025	0.495662	0.80836	-5.82322	0.924876
C6orf118	-0.351407	-6.21911	-1.02722	0.309915	0.680992	-4.77251	0.783819
C6orf120	-0.190203	5.1784	-1.7187	0.0926791	0.449875	-4.72869	0.876482
C6orf132	0.336773	2.85139	1.1547	0.254426	0.632437	-5.1461	1.26293
C6orf136	0.168316	3.66854	1.80947	0.0771927	0.42383	-4.42406	1.12375
C6orf141	0.102952	3.34701	0.390493	0.698051	0.903707	-5.78421	1.07397
C6orf15	0.70285	-5.54361	1.38644	0.172578	0.554552	-4.49709	1.62772
C6orf163	0.236837	0.0341821	1.21314	0.231529	0.61288	-4.72955	1.17841
C6orf201	0.26198	0.906297	1.34334	0.186031	0.570259	-4.67653	1.19912
C6orf203	-0.129172	3.32467	-1.29494	0.202076	0.586891	-5.07897	0.914356
C6orf222	-0.325061	-5.67437	-0.82391	0.414422	0.75963	-4.89164	0.798265
C6orf223	-0.662034	-5.12261	-1.1918	0.239712	0.620353	-4.65406	0.631987
C6orf226	0.231037	2.35694	1.42532	0.1611	0.538172	-4.75804	1.17368
C6orf47	-0.0843315	4.02916	-1.12007	0.268742	0.645194	-5.39518	0.943222
C6orf48	0.0977131	6.47236	0.884205	0.381378	0.735963	-5.72682	1.07008
C6orf52	-0.348491	-1.40686	-1.0309	0.308206	0.678521	-4.78654	0.785405
C6orf58	-0.354635	-3.42418	-0.678458	0.501024	0.810983	-4.9639	0.782068
C6orf62	-0.114755	7.18105	-0.983231	0.330854	0.698102	-5.59389	0.923539
C6orf89	0.0259473	7.02197	0.30317	0.763185	0.916273	-6.02312	1.01815
C7	0.567108	7.25998	1.6059	0.11543	0.484153	-4.84067	1.48155
C7orf25	-0.00464566	3.5337	-0.0443289	0.964842	0.988897	-5.89341	0.996785
C7orf26	-0.119928	4.89578	-1.82218	0.0752093	0.421733	-4.54694	0.920234
C7orf31	0.287659	2.50312	2.88061	0.00610481	0.27548	-2.27138	1.22066
C7orf33	-0.0246897	-6.75909	-0.125784	0.900474	0.967513	-5.1147	0.983032
C7orf43	-0.199665	3.89202	-1.8889	0.0654886	0.40441	-4.32724	0.870753
C7orf50	0.0704746	5.19693	0.411036	0.683036	0.89887	-6.03794	1.05006
C7orf55-LUC7L2	0.0458183	7.05522	0.555935	0.581063	0.850826	-5.91612	1.03227
C7orf57	-0.54697	-3.6383	-1.27325	0.209597	0.593106	-4.59183	0.684456
C7orf61	0.719713	-1.58198	2.40087	0.0206373	0.309053	-3.34678	1.64685
C8A	-1.1496	-6.13187	-2.79886	0.00757677	0.27548	-2.80023	0.450752
C8B	-0.00677575	-5.76942	-0.0139919	0.988899	0.996743	-5.11361	0.995314
C8G	-0.302347	-1.24401	-1.20752	0.233666	0.615706	-4.66264	0.810932
C8orf33	-0.145106	5.8808	-1.31927	0.193883	0.579221	-5.29722	0.904313
C8orf34	-0.46239	0.183813	-0.94187	0.351387	0.713275	-4.95924	0.725783
C8orf37	0.197483	1.57383	1.16817	0.249009	0.627669	-4.92801	1.1467
C8orf44	0.244373	2.13125	1.4949	0.142057	0.518064	-4.6399	1.18458
C8orf48	-0.197305	-0.236789	-0.878752	0.384296	0.737816	-4.96305	0.872178
C8orf58	-0.100646	3.93352	-1.04032	0.303859	0.674669	-5.45983	0.932615
C8orf59	-0.0464893	4.26621	-0.590257	0.558029	0.839902	-5.85917	0.96829
C8orf74	-0.0327945	-6.44095	-0.109136	0.913589	0.971395	-5.11384	0.977525
C8orf76	-0.24382	3.82858	-2.19787	0.0332497	0.335429	-3.77127	0.844506
C8orf82	-0.115434	4.53918	-0.776352	0.441683	0.776221	-5.77382	0.923104
C8orf86	0.822293	-5.63078	2.052	0.046132	0.362791	-3.80808	1.76821
C9	-0.425598	-2.9451	-0.826598	0.412912	0.758816	-4.8923	0.74453
[truncated: 16,297 more rows]

## Sheet: 50-59
gene_symbol	logFC	AveExpr	t	P.Value	adj.P.Val	B	FC
A1BG	0.234353	1.70882	1.12951	0.263018	0.559874	-5.10302	1.17638
A1CF	-0.0649509	-4.99755	-0.137118	0.89138	0.969929	-5.21767	0.955978
A2M	0.174132	10.4416	1.10643	0.2728	0.569476	-5.39273	1.12829
A2ML1	-0.0653322	-1.61768	-0.14418	0.885824	0.966628	-5.23993	0.955725
A3GALT2	0.319807	-3.66838	0.712504	0.478816	0.742067	-5.04461	1.24816
A4GALT	0.35534	5.90302	2.03654	0.0459557	0.232832	-4.29675	1.27929
A4GNT	-1.00038	-3.00667	-1.95382	0.05522	0.256284	-3.88779	0.499869
AAAS	-0.0804104	5.36404	-0.884318	0.379928	0.666158	-5.87282	0.945789
AACS	-0.30173	5.589	-0.914094	0.364195	0.654628	-5.85332	0.811279
AADAC	0.425898	2.14609	0.751186	0.455372	0.722423	-5.49224	1.34341
AADACL2	0.192779	-3.62796	0.360502	0.719693	0.887754	-5.18176	1.14296
AADACL3	-0.490668	-3.57591	-0.756678	0.452098	0.720553	-5.02154	0.711696
AADACL4	-0.437388	-5.71224	-0.98396	0.328945	0.622114	-4.87627	0.73847
AADAT	0.318403	2.5301	2.87614	0.0055059	0.0822513	-2.236	1.24695
AAED1	-0.0482345	4.93995	-0.466915	0.642191	0.846723	-6.12134	0.967119
AAGAB	-0.130597	4.81467	-1.55899	0.12407	0.385414	-5.05379	0.913453
AAK1	-0.423633	3.62207	-2.21113	0.0307091	0.189496	-3.7884	0.745545
AAMDC	-0.139455	3.53683	-1.1809	0.242135	0.538776	-5.3659	0.907862
AAMP	-0.145906	6.83629	-1.36735	0.176432	0.459996	-5.32578	0.903812
AANAT	0.653428	-3.11682	1.63554	0.106983	0.3589	-4.27918	1.5729
AAR2	-0.233936	5.48292	-2.37921	0.0204296	0.152622	-3.6083	0.850312
AARD	0.779013	-3.90103	1.49081	0.141062	0.409491	-4.43539	1.71596
AARS	-0.14968	6.9242	-1.53696	0.129371	0.392033	-5.0885	0.901451
AARS2	-0.104777	3.68186	-1.05939	0.293514	0.590773	-5.51924	0.929949
AARSD1	-0.0443594	4.52415	-0.657962	0.512989	0.76628	-5.97551	0.96972
AASDH	-0.0908043	3.55297	-0.988149	0.326906	0.620349	-5.56515	0.938999
AASDHPPT	-0.178781	4.61042	-2.21311	0.0305653	0.189274	-3.90172	0.883449
AASS	-0.388754	5.54324	-1.49506	0.139952	0.408174	-5.18393	0.763789
AATF	-0.0254736	5.59613	-0.279872	0.780504	0.916838	-6.2216	0.982498
AATK	-0.0138389	3.22138	-0.0527456	0.958104	0.982643	-5.96248	0.990453
ABAT	-0.252849	3.66981	-1.18487	0.240574	0.536968	-5.38469	0.839237
ABCA1	-0.522606	7.31552	-2.29115	0.0253523	0.171302	-3.74261	0.696113
ABCA10	0.731251	5.24017	2.47293	0.0161455	0.135347	-3.39803	1.66008
ABCA12	0.506453	-4.29041	0.910025	0.36632	0.65632	-4.92718	1.42055
ABCA13	-0.689907	-3.6226	-1.17945	0.242709	0.539484	-4.72845	0.619894
ABCA2	-0.054786	6.41073	-0.413677	0.680533	0.868128	-6.16397	0.962737
ABCA3	-0.410777	4.93187	-2.76071	0.00756853	0.0959169	-2.72209	0.752218
ABCA4	0.0626378	0.244713	0.235301	0.814747	0.932821	-5.41685	1.04437
ABCA5	-0.179078	6.18558	-0.9906	0.325717	0.619219	-5.77923	0.883267
ABCA6	0.3987	6.6974	1.70929	0.0923787	0.333144	-4.83878	1.31832
ABCA7	-0.128958	4.49884	-0.678475	0.499986	0.758245	-5.95925	0.914491
ABCA8	0.281556	6.76054	1.22843	0.22391	0.51652	-5.50134	1.21551
ABCA9	0.389456	7.36362	1.41036	0.163413	0.443222	-5.23775	1.3099
ABCB1	0.20629	2.56443	0.671401	0.504449	0.76133	-5.62191	1.15372
ABCB10	-0.134416	4.60229	-1.65577	0.102802	0.351803	-4.88862	0.911038
ABCB11	-0.229785	1.28523	-0.375703	0.708415	0.882718	-5.53468	0.852762
ABCB4	0.836611	0.837762	2.77265	0.00732616	0.0944575	-2.4447	1.78585
ABCB5	1.49714	0.810906	2.62988	0.0107496	0.112643	-2.7359	2.82282
ABCB6	-0.424773	1.43096	-2.5962	0.0117452	0.117342	-2.80676	0.744956
ABCB7	0.10285	4.58983	1.65573	0.102811	0.351803	-4.8874	1.07389
ABCB8	-0.306381	4.63709	-2.94354	0.00455573	0.0753011	-2.25525	0.808668
ABCB9	0.0830464	3.26644	0.614125	0.541371	0.785716	-5.79396	1.05925
ABCC1	0.153691	5.77099	1.45762	0.149973	0.421972	-5.23883	1.11241
ABCC10	0.0248365	4.42469	0.263593	0.792965	0.923328	-6.13945	1.01736
ABCC11	-0.430445	-2.42615	-0.969013	0.336289	0.628966	-4.89258	0.742033
ABCC12	0.00782523	-6.22354	0.0228066	0.981877	0.992672	-5.22752	1.00544
ABCC2	0.764079	2.68408	3.40195	0.00117406	0.0403102	-0.932173	1.69828
ABCC3	0.235344	4.7783	1.02917	0.307384	0.603425	-5.70092	1.17719
ABCC4	-0.0252243	3.09529	-0.161884	0.871921	0.959192	-5.9259	0.982668
ABCC5	0.11776	5.63306	0.528664	0.598918	0.820375	-6.12401	1.08505
ABCC6	-0.248024	2.29344	-0.73108	0.467474	0.732465	-5.5325	0.842049
ABCC8	0.256028	-0.508693	0.571115	0.569978	0.802696	-5.21677	1.19419
ABCC9	-0.039984	6.31355	-0.291904	0.771331	0.913308	-6.20994	0.972666
ABCD1	-0.732353	5.37481	-2.98429	0.00405753	0.0712168	-2.18855	0.601921
ABCD2	-1.06491	4.03545	-2.55096	0.0132151	0.122753	-3.12899	0.478002
ABCD3	-0.188615	5.37607	-2.69727	0.00898407	0.103597	-2.89188	0.877448
ABCD4	0.247754	5.66561	2.27915	0.0260989	0.17355	-3.82059	1.18736
ABCE1	-0.278651	5.63772	-2.02554	0.047105	0.235332	-4.31656	0.824362
ABCF1	-0.182714	6.33593	-1.9238	0.0589557	0.264957	-4.49278	0.881044
ABCF2	-0.197118	5.69751	-1.42585	0.158909	0.435987	-5.28192	0.872292
ABCF3	-0.132264	5.64607	-1.64827	0.104338	0.354508	-4.95916	0.912399
ABCG1	0.262494	5.29549	1.03484	0.304749	0.601121	-5.73082	1.19955
ABCG2	0.661374	2.54734	2.7409	0.00798701	0.098381	-2.54704	1.58159
ABCG4	0.166554	-1.72366	0.541493	0.590101	0.815105	-5.13556	1.12237
ABCG5	-0.189095	-2.6639	-0.529203	0.598547	0.820235	-5.13035	0.877156
ABCG8	-0.456246	-4.33218	-0.771137	0.443543	0.715277	-5.01087	0.728881
ABHD1	-0.141748	0.0309159	-0.662283	0.510235	0.764474	-5.23268	0.90642
ABHD10	-0.107708	4.16078	-1.22239	0.226169	0.519635	-5.42027	0.928061
ABHD11	-0.133765	3.5491	-1.27045	0.208653	0.499566	-5.26553	0.91145
ABHD12	-0.0235128	5.65074	-0.25244	0.801533	0.927698	-6.22967	0.983834
ABHD12B	0.127655	-0.848961	0.497311	0.620722	0.833213	-5.21324	1.09252
ABHD13	-0.105135	4.18977	-1.21394	0.229358	0.522969	-5.43419	0.929718
ABHD14A	-0.182283	3.59107	-1.43659	0.155843	0.43126	-5.06369	0.881308
ABHD14B	-0.292791	6.22811	-3.13249	0.00264171	0.0575516	-1.8054	0.816321
ABHD15	-0.960097	5.0162	-3.99062	0.000176268	0.018656	0.666296	0.514022
ABHD16A	-0.0199198	5.08434	-0.235585	0.814528	0.932813	-6.21136	0.986288
ABHD16B	-0.0535701	2.06304	-0.325008	0.746265	0.901859	-5.68537	0.963549
ABHD17A	0.0443942	6.30541	0.460472	0.646782	0.849259	-6.14832	1.03125
ABHD17B	-0.143379	3.80046	-1.60993	0.112473	0.366645	-4.85347	0.905396
ABHD17C	-0.112622	1.85804	-0.695197	0.48952	0.749592	-5.47831	0.924906
ABHD2	-0.0292522	6.45038	-0.230023	0.818828	0.934664	-6.22	0.979928
ABHD3	-0.242152	3.86496	-1.77445	0.0808785	0.308874	-4.60715	0.845483
ABHD4	-0.107112	5.93119	-1.06747	0.289882	0.587599	-5.70814	0.928445
ABHD5	-1.05539	5.15807	-3.55725	0.000723297	0.0318948	-0.628132	0.481167
ABHD6	-0.419603	4.31798	-2.66481	0.00979843	0.10828	-2.90014	0.74763
ABHD8	-0.29785	3.22063	-2.07447	0.0421775	0.221831	-3.99091	0.813464
ABI1	0.147988	6.13056	2.34488	0.022237	0.158945	-3.681	1.10802
ABI2	0.177776	5.32296	1.63813	0.10644	0.358283	-4.96643	1.13114
ABI3	0.239019	3.37864	1.32286	0.190721	0.477853	-5.1725	1.18019
ABI3BP	0.832341	6.82482	3.46082	0.000978498	0.0365593	-0.893177	1.78057
ABL1	-0.0337982	7.57951	-0.32739	0.744471	0.900795	-6.12391	0.976845
ABL2	0.199077	6.02925	1.33706	0.186071	0.472405	-5.39679	1.14796
ABLIM1	0.274727	8.60542	1.93395	0.0576691	0.261882	-4.34965	1.20977
ABLIM2	0.046939	4.30961	0.191373	0.848856	0.948118	-6.13965	1.03307
ABLIM3	-0.237595	7.81874	-1.14416	0.256939	0.554343	-5.53004	0.848158
ABO	0.249548	0.232574	0.92426	0.35892	0.650013	-5.08737	1.18883
ABR	0.146257	6.97719	1.41138	0.163111	0.442843	-5.25987	1.10669
ABRA	-0.106131	-3.21864	-0.198138	0.843583	0.945813	-5.21659	0.929076
ABRACL	-0.238999	3.02232	-1.18861	0.23911	0.53564	-5.26412	0.847333
ABT1	-0.0495321	4.42273	-0.568551	0.571707	0.803646	-6.01617	0.96625
ABTB1	0.0628714	6.43106	0.480694	0.632419	0.840797	-6.13387	1.04454
ABTB2	0.31875	2.92182	1.36441	0.177351	0.460729	-5.04023	1.24725
AC003006.1	0.0418206	-6.81588	0.306931	0.759921	0.907731	-5.19712	1.02941
AC004593.3	-0.099021	-6.41156	-0.314321	0.754328	0.905013	-5.19299	0.933666
AC005154.6	-0.117504	5.02887	-0.941336	0.350172	0.641217	-5.8046	0.921781
AC005702.1	0.132128	-6.34819	0.522612	0.6031	0.822838	-5.1292	1.09591
AC006486.1	-0.142818	-2.48477	-0.582534	0.562312	0.798324	-5.10917	0.905748
AC007040.2	0.0093906	-6.84186	0.077657	0.93835	0.975006	-5.22944	1.00653
AC008397.1	0.0569531	-6.8038	0.363715	0.717303	0.886816	-5.18316	1.04027
AC010323.1	0.0093906	-6.84186	0.077657	0.93835	0.975006	-5.22944	1.00653
AC010327.1	0.0093906	-6.84186	0.077657	0.93835	0.975006	-5.22944	1.00653
AC010522.1	-0.284724	-5.89813	-0.882548	0.380877	0.667178	-4.94449	0.820899
AC011499.1	0.0093906	-6.84186	0.077657	0.93835	0.975006	-5.22944	1.00653
AC012314.20	0.163414	-6.58567	0.685505	0.49557	0.755116	-5.05926	1.11993
AC012314.8	0.398938	-0.320592	2.08173	0.0414859	0.220183	-3.70541	1.31854
AC017083.3	0.0415929	-6.81588	0.316089	0.752993	0.904225	-5.19504	1.02925
AC018512.1	0.0093906	-6.84186	0.077657	0.93835	0.975006	-5.22944	1.00653
AC020915.1	0.391284	-4.20624	1.19088	0.238224	0.534318	-4.71732	1.31156
AC040162.1	0.185967	-5.97761	0.571664	0.569609	0.802336	-5.10758	1.13758
AC068896.1	0.0743379	-6.7899	0.475081	0.636392	0.843313	-5.14905	1.05288
AC068946.1	0.090799	-6.58385	0.413044	0.680994	0.868325	-5.16789	1.06496
AC078864.2	0.0093906	-6.84186	0.077657	0.93835	0.975006	-5.22944	1.00653
AC093323.1	-0.40308	-6.58567	-1.53731	0.129286	0.392033	-4.3871	0.756242
AC093668.1	0.00665088	-6.71195	0.0360306	0.971373	0.98774	-5.23049	1.00462
AC093668.2	0.193163	0.185277	0.724584	0.471422	0.735488	-5.21611	1.14327
AC096887.1	0.0093906	-6.84186	0.077657	0.93835	0.975006	-5.22944	1.00653
AC098650.1	0.0418466	-6.81588	0.305988	0.760635	0.908141	-5.19733	1.02943
AC105052.1	-0.0470188	-6.492	-0.179757	0.857928	0.952744	-5.21773	0.967934
AC107871.1	0.0093906	-6.84186	0.077657	0.93835	0.975006	-5.22944	1.00653
AC131160.1	0.138335	-6.14578	0.397576	0.692303	0.873874	-5.16967	1.10063
AC138647.1	0.0925068	-6.64315	0.431468	0.667619	0.86169	-5.16261	1.06622
ACAA1	-0.187942	5.67558	-1.95565	0.0549989	0.255711	-4.44488	0.877857
ACAA2	-0.741955	7.08316	-4.07216	0.000133916	0.0169001	0.92718	0.597929
ACACA	-0.431885	5.91269	-1.84508	0.0697846	0.28717	-4.63919	0.741293
ACACB	-1.0113	9.53949	-2.81774	0.00647398	0.0892261	-2.46327	0.496101
ACAD10	-0.137216	4.64458	-1.72999	0.0885887	0.325216	-4.77598	0.909272
ACAD11	-0.490293	-5.7129	-1.15301	0.253316	0.551014	-4.74786	0.711881
ACAD8	-0.203836	4.94313	-2.35264	0.0218164	0.157734	-3.64125	0.868239
ACAD9	-0.275272	5.32613	-3.34451	0.00140011	0.0428365	-1.23183	0.826295
ACADL	0.0307362	3.49549	0.136401	0.891945	0.970254	-6.00913	1.02153
ACADM	-0.446217	5.49185	-3.32751	0.00147449	0.043733	-1.28216	0.733965
ACADS	-0.645086	6.03162	-3.52304	0.000805579	0.0335048	-0.735085	0.639455
ACADSB	-0.0350024	5.21041	-0.278421	0.781612	0.917715	-6.20819	0.97603
ACADVL	-0.279269	8.76653	-2.83498	0.00617311	0.086923	-2.45436	0.824009
ACAN	0.911232	-0.153329	1.73991	0.0868177	0.321482	-4.19952	1.88065
ACAP1	0.185812	3.05526	1.26466	0.210709	0.50209	-5.18412	1.13746
ACAP2	0.0942297	6.12466	1.25936	0.212602	0.504786	-5.49096	1.0675
ACAP3	0.191589	5.89895	1.38385	0.171348	0.452967	-5.33798	1.14202
ACAT1	-0.346095	6.61751	-2.4847	0.0156688	0.132504	-3.36435	0.786711
ACAT2	-0.046287	3.71898	-0.335408	0.738445	0.898029	-6.00636	0.968426
ACBD3	-0.0371825	5.86582	-0.388222	0.699176	0.877714	-6.18797	0.974556
ACBD4	0.129824	4.12013	0.928141	0.35692	0.648044	-5.7149	1.09416
ACBD5	-0.10747	5.04815	-1.22072	0.226798	0.520399	-5.51637	0.928214
ACBD6	0.0769611	4.67262	0.897665	0.372823	0.662009	-5.81232	1.05479
ACBD7	-1.01913	-3.17206	-2.60174	0.0115759	0.116716	-2.9161	0.493415
ACCS	0.205522	5.00323	1.33581	0.186475	0.472972	-5.37319	1.1531
ACCSL	-0.589579	-5.30153	-1.29064	0.201602	0.490342	-4.62876	0.664537
ACD	0.287701	4.30847	2.85569	0.00582863	0.0846539	-2.44574	1.22069
ACE	0.652502	4.95306	2.16647	0.0341124	0.199984	-4.02061	1.57189
ACE2	-0.348914	2.38215	-0.55888	0.578249	0.808079	-5.65076	0.785175
ACER1	1.30025	-3.57117	2.78487	0.00708565	0.0929711	-2.60527	2.46272
ACER2	-0.0999213	3.60895	-0.401132	0.689696	0.872262	-5.96281	0.933084
ACER3	-0.351498	5.47623	-3.03889	0.00346919	0.0658984	-2.05114	0.78377
ACHE	0.603832	0.928542	1.79156	0.0780658	0.303564	-4.19523	1.51975
ACIN1	0.0122914	7.2841	0.187145	0.852155	0.95007	-6.1793	1.00856
ACKR2	0.608767	3.31277	1.91544	0.0600336	0.266654	-4.28716	1.52496
ACKR3	0.237517	6.98842	0.850865	0.398106	0.68218	-5.86451	1.17896
ACKR4	0.325661	2.77869	0.790348	0.432326	0.707897	-5.58275	1.25324
ACLY	-0.0442643	7.25494	-0.201376	0.841061	0.944839	-6.17857	0.969784
ACMSD	-0.00229539	-5.39884	-0.00620114	0.995072	0.998173	-5.22448	0.99841
ACO1	-0.879107	7.75713	-3.78049	0.000353237	0.0236785	0.0590223	0.543704
ACO2	-0.498023	6.09229	-2.95357	0.00442814	0.073946	-2.26967	0.708076
ACOT1	-0.506538	3.61404	-1.86238	0.0672719	0.281391	-4.42377	0.703909
ACOT11	0.486287	0.465201	1.67037	0.0998685	0.346672	-4.32908	1.40084
ACOT12	0.734669	-4.56979	1.66611	0.100716	0.348677	-4.24297	1.66402
ACOT13	-0.295406	3.77517	-2.38285	0.0202456	0.151905	-3.4607	0.814843
ACOT2	-0.712615	5.6088	-3.55225	0.000734805	0.0320929	-0.651683	0.610213
ACOT4	-0.745752	2.37732	-3.16919	0.00237088	0.0541321	-1.52412	0.596357
ACOT6	0.0672896	-4.39476	0.1313	0.895961	0.97162	-5.21964	1.04775
ACOT7	-0.122736	3.71293	-0.822791	0.413768	0.693339	-5.7356	0.918444
ACOT8	-0.113143	3.37355	-1.39514	0.167933	0.4489	-5.08074	0.924572
ACOT9	-0.00899361	5.69641	-0.15539	0.877016	0.961906	-6.24958	0.993785
ACOX1	-0.65556	6.57735	-3.14255	0.00256477	0.0569602	-1.76947	0.634829
ACOX2	0.233844	4.25348	1.70874	0.0924827	0.333144	-4.76608	1.17596
ACOX3	-0.230188	4.13166	-2.91165	0.0049846	0.0787721	-2.29215	0.852524
ACOXL	0.16173	-2.37839	0.490092	0.625792	0.836948	-5.14569	1.11863
ACP1	-0.000167281	5.65848	-0.00232092	0.998156	0.999229	-6.26099	0.999884
ACP2	-0.285289	5.44547	-2.54849	0.0132997	0.122936	-3.23652	0.820577
ACP5	0.697863	4.69048	1.5565	0.124661	0.386594	-5.04623	1.6221
ACP6	0.231846	3.24964	1.54587	0.127206	0.389211	-4.85574	1.17434
ACPP	-0.515633	-0.575819	-1.53433	0.130016	0.392822	-4.43338	0.699486
ACR	0.49964	1.72755	1.63913	0.106232	0.358167	-4.49393	1.41386
ACRBP	0.0680843	0.751151	0.362481	0.718221	0.886864	-5.4564	1.04832
ACRV1	0.324749	-4.93808	0.744354	0.459463	0.72568	-5.02417	1.25245
ACSBG1	-0.231076	-1.13718	-0.939653	0.351028	0.641996	-4.94917	0.851999
ACSBG2	0.457547	-3.12497	1.16276	0.249368	0.546846	-4.74364	1.37321
ACSF2	-0.546092	5.39137	-2.99021	0.00398951	0.0703856	-2.17392	0.684873
ACSF3	-0.0990086	4.14716	-1.20125	0.234204	0.529254	-5.44251	0.933674
ACSL1	-1.16651	9.72246	-3.13517	0.002621	0.0574359	-1.67109	0.445498
ACSL3	-0.156721	5.72636	-1.54582	0.127218	0.389211	-5.11361	0.897062
ACSL4	-0.229033	6.44668	-1.43759	0.155558	0.430798	-5.25178	0.853207
ACSL5	-0.33322	5.73311	-2.39272	0.0197552	0.150055	-3.58278	0.793763
ACSL6	0.154123	-1.26364	0.537158	0.593074	0.817078	-5.16232	1.11274
ACSM1	0.0282423	-2.10402	0.0669379	0.946846	0.978145	-5.23367	1.01977
ACSM2A	0.0448135	-2.34974	0.0905654	0.928129	0.975006	-5.23061	1.03155
ACSM2B	0.201074	-1.96331	0.540305	0.590915	0.815643	-5.13023	1.14955
ACSM3	0.0695129	-0.783381	0.258209	0.797098	0.925269	-5.28934	1.04936
ACSM4	0.524387	-3.39303	1.47845	0.144331	0.414165	-4.44907	1.43832
ACSM5	-0.344405	4.52874	-1.18485	0.240579	0.536968	-5.5104	0.787633
ACSS1	0.264373	5.30492	1.94647	0.0561157	0.258146	-4.45241	1.20111
ACSS2	-0.361808	7.08811	-1.65474	0.103012	0.351898	-4.90312	0.778189
ACSS3	-0.479192	5.5061	-2.02732	0.0469178	0.234832	-4.31099	0.717379
ACTA1	0.0739104	2.57052	0.13761	0.890993	0.969795	-5.82316	1.05257
ACTA2	0.570799	8.56968	1.58809	0.117334	0.374692	-4.91086	1.48535
ACTB	-0.117691	11.8025	-0.843206	0.402342	0.684944	-5.54459	0.921661
ACTBL2	-0.114858	-6.48174	-0.404692	0.687091	0.870943	-5.16976	0.923473
ACTC1	0.9612	1.49449	1.6348	0.107139	0.359172	-4.47267	1.94693
ACTG1	0.13042	10.8705	0.910324	0.366164	0.656169	-5.54938	1.09461
ACTG2	0.775618	5.49365	1.35329	0.180859	0.465568	-5.37417	1.71192
ACTL10	-0.245703	-0.471938	-1.06632	0.2904	0.588061	-4.90443	0.843405
ACTL6A	-0.140863	4.79969	-1.90354	0.0615968	0.269888	-4.49817	0.906977
ACTL6B	-0.536776	-5.3708	-1.29592	0.199787	0.487481	-4.62398	0.68931
ACTL7A	-0.088837	-5.92316	-0.203698	0.839254	0.944199	-5.21086	0.94028
ACTL7B	-0.759846	-5.21598	-1.56993	0.121501	0.38194	-4.35011	0.59056
ACTL8	-0.196005	-6.60984	-0.825809	0.412066	0.691882	-4.98283	0.872964
ACTL9	0.0949848	-5.79601	0.255626	0.799082	0.92634	-5.20165	1.06805
ACTN1	0.0389002	8.19018	0.265104	0.791806	0.922991	-6.0982	1.02733
ACTN2	0.47186	1.07625	1.33304	0.187378	0.47408	-4.80269	1.3869
ACTN3	0.498613	-0.99629	1.54716	0.126895	0.389211	-4.39983	1.41285
ACTN4	0.0851794	9.01716	0.621702	0.536409	0.781781	-5.8857	1.06082
ACTR10	-0.106202	5.73106	-1.78777	0.0786816	0.304606	-4.73606	0.92903
ACTR1A	-0.140109	7.12212	-2.11918	0.038072	0.211264	-4.09486	0.907451
ACTR1B	-0.0537197	6.21599	-0.648046	0.519339	0.769484	-6.05003	0.963449
ACTR2	-0.156619	7.55789	-1.79629	0.077301	0.301944	-4.64848	0.897125
ACTR3	-0.0954371	7.14585	-0.770007	0.444209	0.715739	-5.91786	0.935989
ACTR3B	0.0902322	3.08029	0.888879	0.377491	0.665231	-5.56388	1.06454
ACTR3C	-0.510173	-1.30396	-1.88679	0.0638551	0.274501	-3.9766	0.702138
ACTR5	0.118871	3.78397	1.65877	0.102194	0.350702	-4.77733	1.08588
ACTR6	-0.0764909	4.13021	-1.15866	0.25102	0.54889	-5.48761	0.948362
ACTR8	-0.00476393	4.18789	-0.0708523	0.943742	0.977	-6.13735	0.996703
ACTRT1	-0.089293	-6.72767	-0.426541	0.671185	0.863553	-5.16467	0.939983
ACTRT2	-0.292021	-5.88729	-0.662257	0.510251	0.764474	-5.06682	0.816757
ACTRT3	-0.282253	1.0492	-1.47947	0.144059	0.414039	-4.62708	0.822306
ACVR1	0.00305094	5.38519	0.0261386	0.97923	0.991201	-6.25373	1.00212
ACVR1B	-0.019528	5.57759	-0.143369	0.886462	0.966901	-6.2495	0.986555
ACVR1C	-1.33557	5.19429	-3.16062	0.00243169	0.0549381	-1.72511	0.396236
ACVR2A	0.155472	4.61424	1.33404	0.187052	0.473775	-5.34157	1.11379
ACVR2B	0.0342433	3.38606	0.261808	0.794334	0.924001	-5.96405	1.02402
ACVRL1	-0.0994625	6.77513	-0.787171	0.434169	0.709213	-5.92758	0.933381
ACY1	-0.37194	4.24412	-2.79345	0.00692112	0.0924686	-2.59034	0.772743
ACY3	-0.353141	-4.90779	-0.696814	0.488513	0.748852	-5.04886	0.782878
ACYP1	0.163202	2.28773	1.19513	0.236572	0.532231	-5.1271	1.11977
ACYP2	-0.198549	3.58591	-1.55958	0.12393	0.385241	-4.89262	0.871427
ADA	0.308497	4.51486	1.89139	0.0632278	0.273143	-4.49291	1.23842
ADAD1	-0.200184	-6.36141	-0.622321	0.536004	0.781781	-5.0879	0.87044
ADAD2	-0.762717	-0.745439	-1.56887	0.12175	0.382361	-4.38533	0.589385
ADAL	-0.105481	2.84827	-1.02654	0.30861	0.60473	-5.39747	0.929495
ADAM10	-0.0472617	5.91875	-0.631336	0.530132	0.777737	-6.06667	0.967771
ADAM11	0.502739	1.24783	2.00821	0.0489657	0.239977	-3.88391	1.4169
ADAM12	-0.594253	4.65516	-1.97174	0.0530874	0.250969	-4.36441	0.662388
ADAM15	-0.082446	7.73079	-0.67168	0.504273	0.76133	-5.94689	0.944455
ADAM17	0.0563982	4.56997	0.563711	0.574976	0.805178	-6.03668	1.03987
ADAM18	0.0418503	-6.81588	0.28711	0.774982	0.915082	-5.20142	1.02943
ADAM19	0.385433	3.66699	1.4911	0.140986	0.4094	-5.00229	1.30625
ADAM2	-0.30531	-6.4455	-1.16966	0.246598	0.543901	-4.73666	0.809268
ADAM20	0.0879089	-2.28614	0.344144	0.731898	0.895467	-5.19061	1.06283
ADAM21	0.0855728	-2.38063	0.323673	0.747271	0.901992	-5.19511	1.06111
ADAM22	0.552122	3.42063	2.09949	0.0398353	0.215612	-3.97353	1.46624
ADAM23	0.244378	1.28648	0.715875	0.476746	0.740363	-5.37264	1.18458
ADAM28	0.37067	2.54576	1.17389	0.24491	0.542465	-5.19411	1.29295
ADAM29	1.28817	-5.58125	2.4509	0.0170723	0.139226	-3.16605	2.44218
ADAM30	0.217867	-6.67388	1.13669	0.260025	0.557066	-4.76462	1.16301
ADAM32	0.40165	1.00326	1.82874	0.0722301	0.292187	-4.14631	1.32102
ADAM33	0.621843	7.04571	2.4186	0.0185185	0.145287	-3.48869	1.53884
ADAM7	0.163013	-6.71789	0.903875	0.369547	0.659133	-4.93479	1.11962
ADAM8	0.40494	3.1019	1.56478	0.122704	0.383581	-4.80396	1.32403
ADAM9	0.0320347	6.87945	0.279092	0.781099	0.917407	-6.18459	1.02245
ADAMDEC1	0.255089	-0.274653	0.590753	0.556825	0.795588	-5.23327	1.19341
ADAMTS1	0.0127392	8.64635	0.0541105	0.95702	0.981929	-6.09719	1.00887
ADAMTS10	0.598493	5.95408	3.20464	0.00213421	0.0513895	-1.61768	1.51413
ADAMTS12	-0.611272	4.87761	-3.17297	0.00234452	0.0539683	-1.6784	0.654619
ADAMTS13	0.258891	2.31329	1.56032	0.123755	0.384775	-4.68309	1.19656
ADAMTS14	-0.233352	-0.496956	-0.385644	0.701075	0.878745	-5.28778	0.850656
ADAMTS15	-0.703854	6.20821	-2.64433	0.0103463	0.110788	-3.01669	0.61393
ADAMTS16	-0.388966	0.875439	-1.02706	0.308369	0.60445	-5.0822	0.763677
ADAMTS17	0.340604	1.3415	1.60465	0.113634	0.368207	-4.49693	1.26629
ADAMTS18	-1.07857	2.4736	-1.73356	0.0879485	0.323965	-4.45507	0.473497
ADAMTS19	-0.380434	-4.33468	-0.660539	0.511346	0.765325	-5.06793	0.768206
ADAMTS2	-0.0563938	7.20278	-0.401644	0.689322	0.872258	-6.12328	0.961665
ADAMTS20	-0.0561771	-6.49977	-0.234607	0.815284	0.933005	-5.20949	0.961809
ADAMTS3	0.549504	2.59532	2.20765	0.0309631	0.190197	-3.659	1.46358
ADAMTS4	-1.01793	6.7241	-2.20892	0.0308701	0.189835	-3.93907	0.493826
ADAMTS5	0.0896618	7.06684	0.425579	0.671882	0.863877	-6.12254	1.06412
ADAMTS6	0.453875	2.37425	1.56956	0.121587	0.381982	-4.67947	1.36971
ADAMTS7	0.337416	4.89663	2.05706	0.0438767	0.226872	-4.22688	1.26349
ADAMTS8	0.0429687	0.298193	0.101007	0.91987	0.975006	-5.44288	1.03023
ADAMTS9	-0.58235	6.06707	-1.31021	0.194941	0.482665	-5.42996	0.667875
ADAMTSL1	1.12819	4.11748	3.22555	0.00200516	0.0497094	-1.48617	2.18584
ADAMTSL2	0.385732	1.45318	1.04779	0.298788	0.596251	-5.14292	1.30652
ADAMTSL3	-0.255489	3.11316	-1.14684	0.255839	0.553376	-5.32589	0.837703
ADAMTSL4	-0.272952	7.15758	-1.48646	0.142207	0.4111	-5.14664	0.827624
ADAMTSL5	0.351427	0.376713	0.977573	0.33207	0.625129	-5.06255	1.27582
ADAP1	0.0550738	1.67212	0.263649	0.792921	0.923328	-5.63145	1.03891
ADAP2	-0.113079	4.05208	-0.541853	0.589854	0.815036	-5.9767	0.924613
ADAR	0.0277574	7.86095	0.324352	0.746759	0.901906	-6.10502	1.01943
ADARB1	0.272628	5.74362	1.60797	0.112903	0.367219	-5.02148	1.20801
ADARB2	-0.255756	-1.92374	-0.708907	0.481029	0.743378	-5.05413	0.837548
ADAT1	-0.0299498	3.87119	-0.30094	0.764463	0.909898	-6.04419	0.979454
ADAT2	0.115524	4.11408	0.790334	0.432334	0.707897	-5.82728	1.08337
ADAT3	0.138883	0.789979	0.699259	0.486995	0.747589	-5.31002	1.10105
ADCK1	-0.127443	3.18544	-1.0527	0.296546	0.594069	-5.43553	0.915453
ADCK2	-0.0784219	4.07407	-0.912067	0.365253	0.65537	-5.72204	0.947093
ADCK5	0.00369865	3.46663	0.0329452	0.973824	0.988821	-6.01191	1.00257
ADCY1	0.331018	3.33724	1.26482	0.210651	0.50209	-5.23472	1.2579
ADCY10	-0.107648	-1.27547	-0.430544	0.668287	0.862033	-5.20012	0.9281
ADCY2	0.577507	2.13056	1.61469	0.111436	0.365117	-4.58085	1.49227
ADCY3	-0.218036	6.8231	-1.1189	0.267481	0.56412	-5.62064	0.859735
ADCY4	0.10115	7.18317	0.737451	0.463619	0.729011	-5.93914	1.07263
ADCY5	-0.60958	6.1474	-2.1933	0.0320301	0.193538	-3.99081	0.655387
ADCY6	-0.352274	7.10918	-2.50039	0.0150534	0.130558	-3.30735	0.783348
ADCY7	0.450607	3.25713	2.1946	0.0319325	0.193434	-3.76996	1.36662
ADCY8	0.893664	-4.96501	1.41984	0.160644	0.438642	-4.50613	1.85789
ADCY9	0.218738	5.28058	2.00684	0.0491153	0.240452	-4.34183	1.16372
ADCYAP1	1.32478	0.0141655	1.77408	0.0809416	0.308946	-4.1616	2.50495
ADCYAP1R1	-0.650431	3.54741	-2.07884	0.0417598	0.220996	-4.03021	0.63709
ADD1	-0.00987217	8.43681	-0.15198	0.879695	0.9634	-6.10293	0.99318
ADD2	-0.0615437	1.51171	-0.266859	0.79046	0.922186	-5.6031	0.958238
ADD3	0.184816	7.24049	1.55096	0.125982	0.387986	-5.04963	1.13667
ADGB	0.148209	-4.79784	0.288682	0.773784	0.914627	-5.19452	1.10819
ADH1A	-0.158493	0.672362	-0.386196	0.700669	0.878536	-5.43737	0.895961
ADH1B	-0.601425	11.1833	-1.77401	0.0809523	0.308946	-4.47115	0.659102
ADH1C	-0.385265	3.53769	-1.02266	0.310426	0.606754	-5.52968	0.765639
ADH4	-0.539224	0.488696	-0.895727	0.37385	0.662454	-5.13912	0.688141
ADH5	-0.179295	7.76293	-1.55447	0.125143	0.387003	-5.01201	0.883134
ADH6	-0.0172677	-0.613418	-0.0794395	0.936938	0.975006	-5.33089	0.988102
ADH7	-0.956437	-3.56141	-2.17737	0.0332524	0.197315	-3.57837	0.515328
ADHFE1	-0.136377	4.90053	-0.555354	0.580643	0.809797	-6.07417	0.909801
ADI1	-0.18693	6.24016	-1.47677	0.144778	0.415078	-5.20531	0.878473
ADIG	0.166609	-6.58385	0.644954	0.521327	0.770978	-5.07879	1.12242
ADIPOQ	-1.46246	9.42026	-3.87099	0.000262462	0.0224442	0.360402	0.362873
ADIPOR1	-0.111417	6.51208	-1.49837	0.139092	0.406609	-5.16475	0.925678
ADIPOR2	-0.36271	7.34908	-2.03668	0.045942	0.232827	-4.23819	0.777702
ADIRF	0.0188008	-1.98318	0.0717198	0.943055	0.976623	-5.2349	1.01312
ADK	-0.143435	4.62969	-1.03219	0.305978	0.602074	-5.68327	0.905361
ADM	0.182123	8.35146	0.664522	0.508811	0.763866	-5.90747	1.13455
ADM2	-0.306813	-1.35916	-0.738781	0.462817	0.728187	-5.06025	0.808426
ADM5	0.553563	2.43782	1.93468	0.0575771	0.261779	-4.12748	1.46771
ADNP	-0.0482588	6.44904	-0.902226	0.370415	0.659917	-5.85029	0.967103
ADNP2	-0.11682	5.15893	-1.15437	0.252761	0.551014	-5.5983	0.922218
ADO	-0.302673	3.9921	-3.32777	0.00147333	0.043733	-1.20217	0.810749
ADORA1	-0.935453	1.93188	-2.35273	0.0218118	0.157734	-3.31666	0.522878
ADORA2A	0.428173	1.72045	2.21168	0.0306688	0.189496	-3.56644	1.34553
ADORA2B	-0.0384573	-0.134076	-0.107301	0.914896	0.975006	-5.38537	0.973696
ADORA3	0.164871	2.90809	0.434557	0.665387	0.860962	-5.81151	1.12107
ADPGK	-0.146175	5.88082	-2.24151	0.028568	0.182243	-3.89786	0.903643
ADPRH	-0.00443906	4.68358	-0.0441172	0.964952	0.984865	-6.20282	0.996928
ADPRHL1	-0.0775885	1.37191	-0.420382	0.675654	0.865922	-5.53316	0.94764
ADPRHL2	-0.111033	4.60463	-1.27467	0.207166	0.497788	-5.41393	0.925925
ADPRM	0.124354	3.47047	1.23617	0.221039	0.514045	-5.29171	1.09002
ADRA1A	-0.324567	1.76023	-0.707274	0.482036	0.744033	-5.45416	0.798538
ADRA1B	0.344808	1.85908	1.30604	0.196345	0.484845	-4.93673	1.26998
ADRA1D	0.220458	1.06458	0.673792	0.502939	0.760266	-5.36448	1.1651
ADRA2A	-0.667337	7.22111	-2.72595	0.00831647	0.100261	-2.78622	0.629668
ADRA2B	0.858821	3.49118	2.75725	0.00764009	0.0960607	-2.59711	1.81356
ADRA2C	0.411255	4.29448	1.30956	0.195159	0.483014	-5.33429	1.32984
ADRB1	-0.566946	1.94615	-1.25085	0.215671	0.50854	-5.01182	0.675044
ADRB2	-0.456997	5.42931	-1.79337	0.0777722	0.303009	-4.72154	0.728501
ADRB3	-2.48542	-3.52776	-3.80284	0.000328358	0.0233044	-0.62413	0.178572
ADRM1	-0.113869	6.01514	-1.08592	0.281701	0.578676	-5.68789	0.924107
ADSL	-0.144893	5.23311	-1.60366	0.113853	0.36867	-5.01504	0.904447
ADSS	0.0452925	5.42564	0.505036	0.615318	0.8297	-6.13094	1.03189
ADSSL1	0.309605	3.13455	1.47996	0.143929	0.413941	-4.92722	1.23937
ADTRP	0.0538916	-0.491283	0.178502	0.858908	0.953014	-5.3345	1.03806
AEBP1	0.756687	9.3228	4.40307	4.27501e-05	0.0115048	1.99193	1.68961
AEBP2	0.172144	4.99219	1.80032	0.0766563	0.301162	-4.68898	1.12673
AEN	-0.0460182	3.58839	-0.263102	0.793341	0.923483	-6.00284	0.968606
AES	0.0560969	7.88853	0.644221	0.521799	0.771132	-5.95327	1.03965
AF241726.2	-0.120677	-6.75183	-0.682218	0.497632	0.756771	-5.06183	0.919756
AFAP1	0.107437	6.07035	0.929473	0.356235	0.647377	-5.83879	1.07731
AFAP1L1	0.0614229	6.57162	0.458503	0.648188	0.8498	-6.13737	1.04349
AFAP1L2	0.574148	4.33466	2.69633	0.00900665	0.103726	-2.8285	1.4888
AFF1	0.168697	7.82639	1.18436	0.240773	0.537139	-5.48506	1.12404
AFF2	-0.134138	1.93722	-0.476902	0.635102	0.84233	-5.60726	0.911214
AFF3	-0.0750509	3.61444	-0.254006	0.800328	0.926893	-6.01	0.949309
AFF4	0.0876322	7.08978	1.00915	0.316812	0.612104	-5.71661	1.06262
AFG3L2	-0.241037	5.22001	-2.47735	0.0159647	0.134324	-3.38744	0.846137
AFM	0.247006	-6.51981	0.862377	0.391791	0.677363	-4.96014	1.18674
AFMID	-0.0259999	3.65813	-0.225741	0.822142	0.935931	-6.02462	0.98214
AFP	0.701653	-5.9785	1.88421	0.0642089	0.275253	-3.97855	1.62637
AFTPH	0.0376591	5.28546	0.475589	0.636032	0.843007	-6.13945	1.02645
AGA	0.0348626	3.56924	0.300524	0.764779	0.910037	-5.98907	1.02446
AGAP1	-0.099028	5.49877	-0.86	0.39309	0.678188	-5.89781	0.933662
AGAP2	0.703532	2.3134	2.57325	0.0124711	0.119864	-2.89663	1.62849
AGAP3	0.0479066	6.49063	0.535635	0.59412	0.81778	-6.10401	1.03376
AGAP4	-0.331852	0.895431	-0.732837	0.466409	0.731651	-5.30439	0.794516
AGAP5	-0.06355	2.08795	-0.547131	0.586245	0.812599	-5.60189	0.956907
AGAP6	-0.074638	4.50371	-0.653062	0.516121	0.768013	-5.97618	0.94958
AGAP9	0.145462	-1.04478	0.607254	0.545891	0.788405	-5.14925	1.10609
AGBL1	-0.0236849	-6.15322	-0.0679103	0.946075	0.978019	-5.22556	0.983717
AGBL2	0.379515	-1.04927	1.38013	0.172484	0.454492	-4.57644	1.3009
AGBL3	0.00459008	0.626638	0.0292163	0.976786	0.989888	-5.49356	1.00319
AGBL4	-0.317981	-1.78737	-0.9994	0.321471	0.615589	-4.8769	0.802192
AGBL5	-0.0374304	4.41895	-0.447873	0.6558	0.85564	-6.07507	0.974389
AGER	0.175978	2.24073	1.11879	0.267529	0.56412	-5.19854	1.12973
AGFG1	-0.41977	7.23989	-2.96833	0.00424635	0.0727994	-2.19328	0.747544
AGFG2	0.130374	4.90184	1.00532	0.318633	0.613088	-5.73495	1.09458
AGGF1	-0.194371	4.85024	-2.5752	0.012408	0.119658	-3.14911	0.873954
AGK	-0.0421041	4.65813	-0.585152	0.560561	0.797718	-6.03465	0.971237
AGL	-0.0248228	5.22679	-0.214834	0.830599	0.940751	-6.22442	0.982941
AGMAT	-0.791007	-2.03568	-2.22403	0.029783	0.186259	-3.50783	0.577941
AGMO	-0.420007	1.78039	-2.18865	0.0323833	0.194423	-3.61304	0.747421
AGPAT1	-0.113323	6.01979	-1.37253	0.174824	0.457563	-5.35125	0.924456
AGPAT2	-1.11537	8.51909	-3.43308	0.00106645	0.0382058	-0.913708	0.461573
AGPAT3	-0.367175	6.18927	-3.00492	0.00382507	0.0689643	-2.13736	0.775299
AGPAT4	0.404884	4.49259	2.7487	0.00781967	0.0974534	-2.71932	1.32398
AGPAT5	-0.0367639	3.92149	-0.249044	0.804147	0.928572	-6.06662	0.974839
AGPS	-0.22353	5.55138	-2.67765	0.00946853	0.10592	-2.94188	0.856467
AGR2	0.1161	-3.95667	0.186789	0.852434	0.950139	-5.21494	1.0838
AGR3	-1.0322	-6.21788	-2.89782	0.00518195	0.0799575	-2.4074	0.488964
AGRN	0.468783	5.77962	2.95734	0.00438102	0.0737559	-2.26238	1.38394
AGRP	-0.409799	-5.45831	-0.935928	0.352928	0.644038	-4.90877	0.752728
AGT	0.206001	2.77273	0.588652	0.558225	0.796656	-5.71085	1.15349
AGTPBP1	-0.0314487	4.808	-0.375668	0.708441	0.882718	-6.14743	0.978437
AGTR1	-0.0571458	6.63776	-0.236622	0.813727	0.932273	-6.20919	0.961164
AGTR2	0.0322703	-6.49746	0.121576	0.903627	0.975006	-5.22417	1.02262
AGTRAP	0.0129179	5.20639	0.107654	0.914616	0.975006	-6.2402	1.00899
AGXT	-0.773885	-1.76584	-1.55696	0.12455	0.386448	-4.36977	0.58484
AGXT2	-0.461985	-6.40317	-1.54469	0.127491	0.389562	-4.37881	0.725987
AHCTF1	0.157287	6.55278	1.26463	0.21072	0.50209	-5.46896	1.11519
AHCY	-0.176258	5.77498	-1.30277	0.197452	0.485332	-5.44178	0.884995
AHCYL1	-0.253266	7.38286	-2.79092	0.00696921	0.0928055	-2.62383	0.838995
AHCYL2	-0.0433578	4.70634	-0.440346	0.661212	0.858839	-6.11168	0.970394
AHDC1	0.492752	5.77287	3.49727	0.000873327	0.0348795	-0.809671	1.40713
AHI1	0.149237	4.63908	1.12008	0.266985	0.563662	-5.59381	1.10898
AHNAK	0.0677582	11.5538	0.549187	0.584842	0.812221	-5.75107	1.04809
AHNAK2	0.818875	6.50425	2.96145	0.0043302	0.0733336	-2.23956	1.76403
AHR	0.0387603	6.69101	0.274077	0.784933	0.919079	-6.19695	1.02723
AHRR	-0.019126	1.06491	-0.0672973	0.946561	0.978048	-5.55896	0.98683
AHSA1	-0.131626	5.90616	-1.25689	0.213491	0.505633	-5.49751	0.912802
AHSG	-0.330362	-5.17115	-0.632534	0.529355	0.777028	-5.07946	0.795337
AHSP	-1.84623	-4.74689	-3.24463	0.00189391	0.0482035	-1.76598	0.278119
AICDA	0.572765	-1.33557	1.43953	0.15501	0.430257	-4.50404	1.48737
AIDA	-0.223308	5.55776	-2.32538	0.0233261	0.163036	-3.72324	0.856599
AIF1	-0.0350239	4.17843	-0.129388	0.897468	0.972447	-6.13021	0.976016
AIF1L	-0.535799	6.59475	-2.52266	0.0142171	0.127021	-3.28113	0.689777
AIFM1	-0.397892	4.93665	-3.49829	0.000870546	0.0348795	-0.7881	0.758967
AIFM2	-0.853276	6.79242	-3.71901	0.000431314	0.025239	-0.149808	0.553527
AIFM3	0.155232	-0.0265276	0.603136	0.54861	0.789957	-5.25612	1.1136
AIG1	-0.0918664	4.8691	-0.807958	0.422192	0.700083	-5.90472	0.938308
AIM2	0.788827	-1.15985	2.71708	0.00851807	0.101261	-2.67573	1.72767
AIMP1	-0.0508446	5.49404	-0.728266	0.469182	0.733604	-5.99909	0.965371
AIMP2	-0.341596	3.36023	-2.65172	0.0101454	0.109873	-2.82508	0.789168
AIP	0.138941	5.65616	1.27423	0.20732	0.497828	-5.47612	1.1011
AIPL1	-0.330469	-5.66864	-0.857179	0.394635	0.679423	-4.95965	0.795278
AIRE	0.48524	-1.96227	1.18165	0.241841	0.538339	-4.73146	1.39982
AJAP1	0.290802	1.31228	1.03751	0.303513	0.600692	-5.13197	1.22332
AJUBA	0.141328	3.57484	0.775991	0.440693	0.713437	-5.74619	1.10292
AK1	0.094575	5.63008	0.999339	0.3215	0.615589	-5.77536	1.06775
AK2	-0.537541	6.71602	-4.14652	0.000103992	0.0157921	1.15175	0.688944
AK3	-0.0831097	6.62754	-0.88494	0.379595	0.666126	-5.85663	0.944021
AK4	-0.744736	5.58681	-3.77271	0.000362309	0.0237958	-0.00574413	0.596777
AK5	0.646492	-0.369122	1.59818	0.115067	0.370662	-4.36868	1.56536
AK7	0.122044	0.635671	0.697569	0.488044	0.748353	-5.28983	1.08828
AK8	0.169374	0.29683	1.04276	0.301094	0.598589	-4.99968	1.12457
AK9	0.0703273	2.76727	0.78153	0.437454	0.711152	-5.58698	1.04995
AKAP1	-0.188342	6.5768	-1.37464	0.174173	0.45675	-5.32981	0.877614
AKAP10	-0.0590976	5.18662	-1.12371	0.265451	0.561808	-5.63331	0.959864
AKAP11	-0.0685618	6.16206	-0.708848	0.481066	0.743378	-6.01153	0.953588
AKAP12	-0.259769	8.42559	-0.976486	0.332604	0.625877	-5.65736	0.835222
AKAP13	0.290285	7.55608	2.56241	0.0128281	0.121132	-3.14691	1.22288
AKAP14	-0.44973	-5.69175	-1.04013	0.302302	0.599428	-4.83571	0.73218
AKAP17A	0.0093906	-6.84186	0.077657	0.93835	0.975006	-5.22944	1.00653
AKAP2	-0.342335	8.51898	-2.65123	0.0101587	0.109873	-2.89749	0.788764
AKAP3	-0.319502	-1.0084	-1.29577	0.199838	0.48754	-4.66171	0.801346
AKAP4	-0.690749	-5.25518	-1.29354	0.200605	0.48876	-4.62612	0.619532
AKAP5	-0.0754465	0.576094	-0.406722	0.685608	0.870507	-5.41673	0.949048
AKAP6	0.737096	2.20632	2.11885	0.0381007	0.211264	-3.7792	1.66682
AKAP7	-0.370448	3.53471	-3.68661	0.000478838	0.0264981	-0.172931	0.773542
AKAP8	0.106116	5.94951	1.13814	0.259425	0.556331	-5.63308	1.07633
AKAP8L	0.229142	6.19215	2.55246	0.0131637	0.122624	-3.22714	1.17214
AKAP9	0.114041	6.45124	0.994902	0.323636	0.617651	-5.76544	1.08226
AKIP1	0.120968	3.68661	1.35183	0.181321	0.465905	-5.18945	1.08746
AKIRIN1	-0.205673	5.60414	-1.87428	0.0655865	0.277639	-4.58777	0.867134
AKIRIN2	-0.107465	5.29086	-1.24015	0.219574	0.512004	-5.50686	0.928218
AKNA	-0.0821355	6.38269	-0.621757	0.536373	0.781781	-6.06019	0.944658
AKNAD1	1.08184	-1.07147	3.27944	0.00170567	0.0460186	-1.58793	2.11674
AKR1A1	-0.196321	5.98656	-2.20237	0.0313524	0.19125	-3.97553	0.872773
AKR1B1	0.122219	6.31833	0.70073	0.486083	0.746835	-6.01204	1.08841
AKR1B10	0.643245	-1.44685	1.26698	0.209883	0.501305	-4.66841	1.56184
AKR1B15	0.137252	-1.70948	0.261386	0.794658	0.924001	-5.21878	1.09981
AKR1C1	0.115883	7.66654	0.397262	0.692533	0.874015	-6.09325	1.08364
AKR1C2	-0.42907	7.96301	-1.22904	0.223683	0.516127	-5.4248	0.742741
AKR1C3	-0.343718	6.85139	-1.37226	0.174909	0.457706	-5.31858	0.788008
AKR1C4	0.434136	-4.20583	1.08613	0.28161	0.578676	-4.80195	1.3511
AKR1D1	-0.301148	-6.05189	-0.790603	0.432178	0.707897	-5.00034	0.811606
AKR1E2	0.0848622	1.91196	0.662473	0.510114	0.764474	-5.50755	1.06059
AKR7A2	-0.317329	4.9665	-2.80245	0.00675227	0.0912603	-2.62362	0.802554
AKR7A3	0.587284	0.774953	2.20379	0.0312468	0.191179	-3.52894	1.50242
AKT1	-0.342352	6.77237	-3.08691	0.00301842	0.0613067	-1.90844	0.788754
AKT1S1	-0.13815	5.90764	-1.40432	0.165195	0.445092	-5.31081	0.908684
AKT2	-0.419387	7.39869	-3.59119	0.00064961	0.0303669	-0.503621	0.747742
AKT3	0.246184	6.17115	1.97158	0.0531064	0.250985	-4.41187	1.18607
AKTIP	-0.0154073	5.23619	-0.179974	0.857758	0.95273	-6.23167	0.989377
AL035460.1	0.0894529	-6.77782	0.520173	0.604789	0.823416	-5.13266	1.06397
AL121594.1	0.0093906	-6.84186	0.077657	0.93835	0.975006	-5.22944	1.00653
AL121753.1	0.119528	-6.62192	0.514644	0.608625	0.825197	-5.13385	1.08638
AL139300.1	0.0093906	-6.84186	0.077657	0.93835	0.975006	-5.22944	1.00653
AL160269.1	0.164502	-6.71789	0.781237	0.437625	0.711364	-5.00925	1.12078
AL357673.1	0.0928717	2.16991	0.508744	0.612731	0.82777	-5.63539	1.06649
AL359922.1	0.0093906	-6.84186	0.077657	0.93835	0.975006	-5.22944	1.00653
AL391650.1	0.0093906	-6.84186	0.077657	0.93835	0.975006	-5.22944	1.00653
AL512428.1	0.160627	-4.04119	0.396683	0.692958	0.87426	-5.17002	1.11777
AL590560.1	0.565974	-3.81156	1.11691	0.268328	0.564608	-4.77894	1.48039
AL645922.1	0.0093906	-6.84186	0.077657	0.93835	0.975006	-5.22944	1.00653
AL713999.1	-0.181046	-6.46784	-0.791896	0.431429	0.707168	-5.00186	0.882063
ALAD	-0.119074	5.97138	-0.945554	0.348032	0.639367	-5.82584	0.920778
ALAS1	-0.455172	5.7344	-3.80715	0.000323759	0.0233044	0.0964267	0.729423
ALAS2	-1.47659	-1.31411	-3.14644	0.0025355	0.0567234	-1.88525	0.359338
ALB	-0.193635	-0.309148	-0.319849	0.750154	0.903265	-5.32761	0.8744
ALCAM	0.691273	4.67902	2.4552	0.016888	0.138463	-3.40281	1.61471
ALDH16A1	-0.147414	5.82865	-1.14224	0.257731	0.555116	-5.62945	0.902867
ALDH18A1	-0.209064	4.5757	-1.52233	0.132992	0.397926	-5.08406	0.865098
ALDH1A1	0.710183	6.16086	3.21769	0.00205281	0.0500886	-1.58003	1.63601
ALDH1A2	0.721965	4.25592	3.32652	0.00147895	0.0437943	-1.2254	1.64943
ALDH1A3	-0.0892259	4.19244	-0.297316	0.767215	0.911001	-6.09765	0.940027
ALDH1B1	0.0810267	4.65164	0.320089	0.749973	0.903225	-6.15051	1.05777
ALDH1L1	-1.21396	5.96932	-2.82752	0.00630169	0.0875633	-2.58434	0.431085
ALDH1L2	0.370541	4.52458	1.69168	0.0957089	0.33963	-4.8245	1.29284
ALDH2	-0.555878	8.79023	-2.07738	0.0418991	0.221351	-4.07874	0.680243
ALDH3A1	0.43462	0.204144	1.41021	0.163457	0.443222	-4.62781	1.35155
ALDH3A2	-0.194819	6.54919	-1.40925	0.163737	0.44345	-5.28547	0.873683
ALDH3B1	-0.0649261	4.4792	-0.421553	0.674803	0.865254	-6.0937	0.955994
ALDH3B2	0.0294269	-3.05986	0.056096	0.955445	0.981263	-5.23038	1.02061
ALDH4A1	-0.914411	5.79379	-2.87935	0.00545687	0.0821145	-2.45762	0.530561
ALDH5A1	-0.251911	3.95263	-1.09154	0.279243	0.57618	-5.53205	0.839783
ALDH6A1	-0.57212	5.55639	-2.35569	0.0216531	0.157305	-3.65953	0.672628
ALDH7A1	-0.227967	5.35367	-2.31049	0.0241887	0.166599	-3.74914	0.853837
ALDH8A1	-0.00746055	-0.29497	-0.027652	0.978028	0.990684	-5.36988	0.994842
ALDH9A1	-0.445116	6.62279	-3.56949	0.000695858	0.0309834	-0.589995	0.734525
ALDOA	-0.139703	9.5871	-1.13045	0.262622	0.559356	-5.42376	0.907706
ALDOB	-0.374201	-1.20745	-1.02065	0.311371	0.607602	-4.88572	0.771533
ALDOC	-0.256646	5.44144	-0.778574	0.439181	0.712385	-5.96077	0.837032
ALG1	-0.175009	3.37364	-1.79114	0.0781327	0.303564	-4.50415	0.885762
ALG10	-0.0721368	0.763992	-0.607563	0.545688	0.788355	-5.3572	0.951228
ALG10B	0.196639	1.29894	1.44841	0.152523	0.426002	-4.6935	1.14603
ALG11	-0.148307	2.11242	-1.49022	0.141217	0.409708	-4.74765	0.902309
ALG12	-0.0504106	3.54576	-0.613679	0.541664	0.78583	-5.84795	0.965661
ALG13	-0.0160002	5.3627	-0.202444	0.84023	0.944772	-6.23311	0.988971
ALG14	-0.410245	3.18549	-2.79594	0.00687404	0.0921369	-2.47527	0.752496
ALG1L	0.923078	-2.54632	2.16515	0.034218	0.200253	-3.59496	1.89616
ALG1L2	0.397361	-3.17544	1.13648	0.260112	0.557109	-4.76503	1.3171
ALG2	-0.249865	4.3451	-2.91066	0.00499844	0.0787868	-2.31391	0.840975
ALG3	-0.248052	4.82222	-1.93437	0.0576165	0.261867	-4.44559	0.842032
ALG5	-0.138027	4.69877	-1.50298	0.137901	0.405282	-5.12384	0.908761
ALG6	-0.0260052	3.43683	-0.308399	0.758809	0.907004	-5.96123	0.982136
ALG8	-0.361094	4.47972	-3.99046	0.000176366	0.018656	0.685181	0.778574
ALG9	-0.150706	5.50317	-1.16968	0.246588	0.543901	-5.59537	0.90081
ALK	-1.58523	-1.53661	-3.8935	0.000243633	0.0221961	-0.364651	0.333272
ALKBH1	0.0640091	3.67464	0.691873	0.49159	0.7512	-5.82309	1.04537
ALKBH2	0.0453733	3.91927	0.371215	0.711738	0.884537	-6.02971	1.03195
ALKBH3	-0.0985637	4.2272	-1.21251	0.229898	0.523406	-5.44109	0.933962
ALKBH4	0.0794735	2.79393	0.842484	0.402743	0.684962	-5.54623	1.05663
ALKBH5	0.00833802	6.30215	0.100171	0.920531	0.975006	-6.24715	1.0058
ALKBH6	0.205041	3.16653	2.06241	0.0433488	0.224947	-4.0052	1.15272
ALKBH7	-0.147687	5.00168	-1.20746	0.231825	0.526297	-5.52844	0.902696
ALKBH8	0.0477434	3.37594	0.55528	0.580693	0.809797	-5.84801	1.03365
ALLC	0.986853	-3.52448	1.71573	0.0911863	0.330831	-4.18604	1.98186
ALMS1	0.0639143	4.72652	0.727106	0.469887	0.734364	-5.95137	1.0453
ALOX12	0.244442	0.586798	1.91336	0.060304	0.267531	-3.99111	1.18463
ALOX12B	0.340284	-4.18302	0.644906	0.521358	0.770978	-5.0758	1.26601
ALOX15	-0.455976	-4.47467	-0.900043	0.371567	0.660996	-4.93316	0.729017
ALOX15B	0.645192	1.51363	1.07978	0.284408	0.582046	-5.12214	1.56395
ALOX5	0.121948	4.73122	0.543438	0.588769	0.814195	-6.0649	1.0882
ALOX5AP	-0.349397	3.88404	-1.37141	0.175172	0.458042	-5.19675	0.784912
ALOXE3	0.757817	-3.55213	1.51158	0.135701	0.40202	-4.41422	1.69093
ALPI	-0.170093	-6.22185	-0.478441	0.634013	0.841628	-5.14442	0.888785
ALPK1	0.138497	4.96316	1.06295	0.29191	0.589564	-5.68252	1.10076
ALPK2	1.18238	0.718522	2.83438	0.00618324	0.086923	-2.32021	2.26951
ALPK3	-1.11629	5.20577	-3.80319	0.000327987	0.0233044	0.091972	0.461278
ALPL	0.119542	5.05154	0.299317	0.765695	0.910593	-6.19254	1.08639
ALPP	0.00549828	-6.2123	0.0124688	0.990091	0.995969	-5.22757	1.00382
ALS2	0.0499955	5.10931	0.829716	0.409871	0.690578	-5.90526	1.03526
ALS2CL	0.321199	5.60598	2.01937	0.0477599	0.236946	-4.32753	1.24937
ALS2CR12	-0.470575	-0.361834	-1.64063	0.105919	0.357622	-4.31697	0.721677
ALX1	1.76667	-3.31953	3.13358	0.00263326	0.0574359	-1.96816	3.40267
ALX3	-0.0248127	-6.47378	-0.0978171	0.922392	0.975006	-5.22592	0.982948
ALX4	-0.273722	0.114515	-0.686758	0.494786	0.754549	-5.22931	0.827183
ALYREF	-0.226123	4.81267	-1.73658	0.0874083	0.322559	-4.78032	0.854929
AMACR	-0.207531	3.21195	-1.42677	0.158644	0.435628	-5.01142	0.866018
AMBN	-0.01077	-6.66362	-0.0459217	0.96352	0.984588	-5.22989	0.992563
AMBP	0.0397139	-3.83677	0.0660974	0.947512	0.978347	-5.2266	1.02791
AMBRA1	0.120242	5.19725	1.60378	0.113827	0.36867	-5.01305	1.08692
AMD1	-0.206875	5.7039	-1.59488	0.115804	0.371987	-5.041	0.866412
AMDHD1	-0.511608	-0.520004	-1.98163	0.051942	0.247343	-3.85243	0.70144
AMDHD2	0.179066	4.19091	1.26557	0.210383	0.501949	-5.37383	1.13215
AMELX	0.0453774	-6.41769	0.143974	0.885986	0.966628	-5.2215	1.03195
AMELY	0.0093906	-6.84186	0.077657	0.93835	0.975006	-5.22944	1.00653
AMER1	0.0408018	2.62956	0.307628	0.759393	0.907506	-5.79969	1.02869
AMER2	-1.70047	-3.85376	-3.59893	0.000633833	0.029819	-1.05328	0.307685
AMER3	-0.591999	-5.8346	-1.55571	0.124849	0.386714	-4.36587	0.663423
AMFR	-0.00399716	6.34415	-0.0472904	0.962433	0.984272	-6.2493	0.997233
AMH	0.0898821	-1.60187	0.180671	0.857213	0.952517	-5.23636	1.06428
AMHR2	0.385364	-2.59425	1.10246	0.274507	0.57085	-4.79326	1.30619
AMIGO1	-0.305705	3.22269	-1.37755	0.173276	0.455596	-5.07672	0.809047
AMIGO2	-0.101229	4.25669	-0.481775	0.631655	0.840584	-6.03753	0.932239
AMIGO3	0.0093906	-6.84186	0.077657	0.93835	0.975006	-5.22944	1.00653
AMMECR1	0.168145	3.22961	1.79382	0.0776988	0.302924	-4.47686	1.12361
AMMECR1L	-0.154556	5.49416	-2.00482	0.0493372	0.240986	-4.35236	0.898409
AMN	-1.50136	-1.51163	-3.49838	0.000870302	0.0348795	-1.20116	0.353221
AMN1	0.0962436	1.83645	0.927105	0.357453	0.648626	-5.30682	1.06899
AMOT	0.503907	3.66075	2.07674	0.0419602	0.22147	-4.05035	1.41805
AMOTL1	-0.218023	6.38697	-2.19054	0.0322394	0.19414	-3.9894	0.859743
AMOTL2	-0.000595644	8.00326	-0.0034888	0.997228	0.998974	-6.14583	0.999587
AMPD1	-0.920827	-3.45269	-1.66217	0.101507	0.35009	-4.24848	0.528206
AMPD2	0.129311	4.79511	0.76532	0.446974	0.717447	-5.93049	1.09377
AMPD3	-0.0376931	3.8556	-0.225901	0.822019	0.935914	-6.06053	0.974211
AMPH	-0.022584	3.40164	-0.0587912	0.953307	0.980305	-5.99814	0.984468
AMT	0.468062	4.68488	2.97948	0.00411362	0.0716969	-2.16804	1.38325
AMTN	0.08825	-6.77782	0.620149	0.537424	0.782444	-5.09125	1.06308
AMY1A	-0.110232	-6.67388	-0.577286	0.565829	0.800121	-5.10933	0.926439
AMY1B	-0.781887	-4.27404	-2.05192	0.0443903	0.228058	-3.75611	0.581606
AMY1C	-0.253231	-6.7899	-1.90415	0.0615158	0.269888	-3.95285	0.839015
AMY2A	-0.595338	-2.30891	-0.896254	0.373571	0.66236	-4.94191	0.66189
AMY2B	0.258566	5.23368	1.63845	0.106374	0.358167	-4.96218	1.19629
AMZ1	0.410646	-1.96464	1.34015	0.185069	0.471168	-4.58928	1.32928
AMZ2	-0.133684	5.66546	-1.7079	0.0926389	0.333325	-4.86577	0.911501
ANAPC1	-0.0947741	4.37813	-1.3339	0.187097	0.473775	-5.31466	0.936419
ANAPC10	-0.0401068	3.0885	-0.420951	0.675241	0.865693	-5.85318	0.972583
ANAPC11	-0.26865	5.33809	-2.23996	0.0286742	0.182454	-3.89327	0.830096
ANAPC13	-0.195205	5.4057	-2.10748	0.0391111	0.214163	-4.15682	0.873449
ANAPC15	-0.228733	2.70345	-1.76447	0.08256	0.312277	-4.44139	0.853384
ANAPC16	-0.172047	6.55509	-1.75077	0.0849133	0.317514	-4.77865	0.887583
ANAPC2	0.0953529	5.90365	1.23738	0.220594	0.5134	-5.52077	1.06833
ANAPC4	0.0526534	5.04353	0.782475	0.436902	0.710593	-5.9379	1.03717
ANAPC5	-0.0447191	7.10928	-0.728602	0.468978	0.733404	-5.95019	0.969479
ANAPC7	-0.140236	5.35926	-2.34621	0.0221643	0.158945	-3.67465	0.907371
ANG	-0.161653	3.46491	-0.831766	0.408721	0.689608	-5.68321	0.894
ANGEL1	-0.00862893	4.76849	-0.0754974	0.940061	0.975438	-6.2096	0.994037
ANGEL2	-0.0195994	5.24602	-0.219712	0.826815	0.938862	-6.22443	0.986507
ANGPT1	-0.155208	5.09154	-0.594933	0.554045	0.793724	-6.06635	0.898003
ANGPT2	0.261491	5.17468	0.820952	0.414807	0.693954	-5.91613	1.19872
ANGPT4	0.258143	2.22609	0.817584	0.416713	0.695536	-5.45934	1.19594
ANGPTL1	0.0963615	5.64235	0.327727	0.744218	0.900795	-6.20818	1.06907
ANGPTL2	-0.143157	8.09693	-0.860213	0.392973	0.678114	-5.78246	0.905535
ANGPTL3	0.933408	-3.59935	2.3216	0.0235422	0.163811	-3.36424	1.90978
ANGPTL4	-0.783339	8.10882	-2.64551	0.010314	0.110766	-2.93067	0.581021
ANGPTL5	0.674958	2.203	1.78449	0.0792177	0.305454	-4.33926	1.59655
ANGPTL6	0.499884	-1.46065	1.27992	0.205322	0.495763	-4.656	1.4141
ANGPTL7	0.72662	0.920581	1.07935	0.284599	0.582242	-5.04152	1.65476
ANHX	0.236006	-6.39401	0.910849	0.365889	0.656044	-4.92863	1.17773
ANK1	0.295774	1.24335	0.950606	0.345481	0.637545	-5.1967	1.22754
ANK2	0.46255	6.2736	2.13475	0.0367263	0.207551	-4.10265	1.37798
ANK3	0.514265	2.87889	2.1876	0.0324632	0.194588	-3.73234	1.42827
ANKAR	0.224663	2.26824	1.64386	0.105247	0.356274	-4.55864	1.1685
ANKDD1A	0.244321	4.65637	1.50587	0.13716	0.404246	-5.11577	1.18453
ANKDD1B	0.143396	-0.509005	0.414457	0.679964	0.867677	-5.27738	1.1045
ANKEF1	-0.690894	1.9232	-3.31846	0.00151564	0.0439547	-1.15529	0.61947
ANKFN1	1.09586	-0.68093	2.65829	0.00996989	0.109055	-2.74704	2.1374
ANKFY1	0.0951593	6.08043	1.32724	0.189278	0.47658	-5.40833	1.06818
ANKH	0.164193	5.95223	1.80898	0.0752848	0.298335	-4.69997	1.12054
ANKHD1	0.0604658	7.11132	0.978811	0.331463	0.624564	-5.74421	1.0428
ANKIB1	-0.0186014	5.73731	-0.252742	0.801301	0.927619	-6.23034	0.987189
ANKK1	0.11762	-1.09494	0.405961	0.686164	0.870669	-5.22221	1.08494
ANKLE1	0.34133	0.481236	1.84279	0.0701225	0.287998	-4.08981	1.26692
ANKLE2	-0.040767	6.63405	-0.520185	0.60478	0.823416	-6.10473	0.972138
ANKMY1	0.0923155	3.83596	1.14269	0.257543	0.555063	-5.45912	1.06608
ANKMY2	-0.0760098	4.43652	-0.783076	0.436552	0.710514	-5.87797	0.948678
ANKRA2	0.151087	3.99432	1.44791	0.15266	0.426127	-5.11302	1.11041
ANKRD1	0.734891	-0.405551	1.67211	0.0995238	0.346251	-4.27554	1.66427
ANKRD10	0.0757405	6.98582	0.900394	0.371381	0.660825	-5.82287	1.0539
ANKRD11	0.0394949	6.92291	0.52455	0.601759	0.822093	-6.08589	1.02775
ANKRD12	0.162986	6.49205	1.82819	0.0723148	0.292455	-4.65273	1.1196
ANKRD13A	0.122018	5.67629	1.77747	0.0803773	0.307463	-4.75284	1.08826
ANKRD13B	0.308825	3.9462	1.87374	0.0656631	0.277834	-4.45333	1.2387
ANKRD13C	-0.0381253	4.81446	-0.547563	0.58595	0.812599	-6.07085	0.97392
ANKRD13D	0.221123	5.12206	1.95369	0.0552358	0.256292	-4.43092	1.16564
ANKRD16	0.085031	2.45611	0.956413	0.342564	0.635293	-5.38882	1.06071
ANKRD17	0.000451065	6.76761	0.00605388	0.995189	0.998173	-6.22925	1.00031
ANKRD18A	-0.10579	-4.78328	-0.203831	0.839151	0.944199	-5.20973	0.929296
ANKRD18B	-0.0471135	-6.03351	-0.124837	0.901055	0.974084	-5.22084	0.967871
ANKRD2	-0.0683378	-1.94847	-0.12257	0.902843	0.975006	-5.23191	0.953736
ANKRD20A1	-0.318582	-3.32859	-0.661178	0.510939	0.765082	-5.07143	0.801858
ANKRD20A2	-0.588206	-5.19268	-1.06332	0.291745	0.589564	-4.81789	0.66517
ANKRD20A3	0.0913492	-3.5693	0.21781	0.82829	0.939509	-5.2121	1.06537
ANKRD20A4	0.202875	-3.05291	0.294788	0.769137	0.912256	-5.19979	1.15099
ANKRD20A8P	-2.81055	-5.43734	-5.22497	2.14506e-06	0.00412594	2.56335	0.142541
ANKRD22	0.173375	-3.21565	0.271183	0.787148	0.920552	-5.20408	1.12769
ANKRD23	0.435397	-0.759074	1.87623	0.0653144	0.277	-3.9968	1.35228
ANKRD24	-0.40641	0.932295	-1.65862	0.102224	0.350713	-4.38294	0.754499
ANKRD26	0.0865459	3.58553	0.772145	0.442951	0.715077	-5.751	1.06182
ANKRD27	0.00811742	5.0208	0.103594	0.917824	0.975006	-6.2288	1.00564
ANKRD28	0.151409	6.38204	1.20346	0.233355	0.527926	-5.54838	1.11065
ANKRD29	0.11124	4.78222	0.518568	0.605901	0.823902	-6.08279	1.08016
ANKRD30A	-0.777857	-0.945316	-1.30816	0.19563	0.483912	-4.6533	0.583232
ANKRD30B	0.144287	-3.73486	0.240693	0.810584	0.931098	-5.20753	1.10518
ANKRD30BL	-0.112177	-6.30717	-0.360982	0.719335	0.887626	-5.18083	0.925191
ANKRD31	-0.0408454	-1.77771	-0.131829	0.895545	0.971619	-5.23515	0.972085
ANKRD33	0.689543	-3.70831	1.34655	0.183008	0.468202	-4.5791	1.61277
ANKRD33B	0.433586	-0.629635	1.40945	0.163678	0.44345	-4.56865	1.35059
ANKRD34A	-0.0134585	0.703864	-0.0785369	0.937653	0.975006	-5.50272	0.990715
ANKRD34B	-0.255541	-5.00571	-0.467573	0.641723	0.846479	-5.14515	0.837673
ANKRD34C	1.2425	-2.87101	1.90453	0.0614654	0.26987	-3.95235	2.36609
ANKRD35	0.437089	3.19661	2.60759	0.0113994	0.115697	-2.90551	1.35387
ANKRD36	0.312975	3.28313	2.04555	0.0450335	0.22975	-4.05279	1.24227
ANKRD36B	0.408967	1.84007	2.32175	0.0235335	0.163811	-3.36966	1.32773
ANKRD36C	0.471366	2.55297	2.47293	0.0161454	0.135347	-3.12754	1.38642
ANKRD37	0.487773	2.3054	1.90359	0.0615898	0.269888	-4.16211	1.40228
ANKRD39	0.106299	2.33432	1.44499	0.153477	0.427689	-4.83993	1.07646
ANKRD40	-0.186061	6.34452	-1.38758	0.170214	0.451868	-5.32273	0.879003
ANKRD42	0.142809	3.28116	1.49503	0.139961	0.408174	-4.93186	1.10405
ANKRD44	0.261469	2.83081	1.67103	0.0997372	0.346515	-4.60424	1.1987
ANKRD45	-0.502041	-3.28862	-1.12655	0.264256	0.560995	-4.77274	0.706107
ANKRD46	-0.418443	4.16932	-3.13757	0.00260255	0.0573814	-1.72206	0.748232
ANKRD49	0.090954	3.95159	1.13	0.262811	0.559627	-5.49145	1.06507
ANKRD50	0.313368	4.93831	1.99389	0.0505506	0.244256	-4.34676	1.24261
ANKRD52	0.0269211	5.92416	0.298088	0.766629	0.910942	-6.21773	1.01884
ANKRD53	-1.36284	2.73263	-4.73294	1.31783e-05	0.00748548	2.97001	0.388815
ANKRD54	0.00642748	4.29674	0.08824	0.929969	0.975006	-6.15185	1.00447
ANKRD55	0.124701	-2.88805	0.290736	0.77222	0.913662	-5.20115	1.09028
ANKRD6	0.277154	3.4317	2.55471	0.0130871	0.122076	-3.04933	1.2118
ANKRD60	-0.753671	-6.61166	-3.76157	0.000375696	0.0240565	-0.709278	0.593092
ANKRD61	-0.147432	-0.907409	-0.459478	0.647492	0.849585	-5.22161	0.902856
ANKRD62	0.143337	-6.33912	0.447589	0.656004	0.855682	-5.15557	1.10446
ANKRD63	-0.132763	-6.29511	-0.42005	0.675895	0.865922	-5.16397	0.912083
ANKRD65	-0.612281	2.4577	-1.86763	0.066524	0.279667	-4.24115	0.654161
ANKRD66	0.160331	-6.10324	0.428867	0.669501	0.862807	-5.16003	1.11754
ANKRD7	-0.0743731	-3.74351	-0.15815	0.874851	0.960624	-5.21949	0.949755
ANKRD9	0.200134	3.28995	1.01799	0.312623	0.608308	-5.48852	1.14881
ANKS1A	0.135459	6.15209	1.10585	0.273046	0.569616	-5.66398	1.09844
ANKS1B	0.0518726	0.470604	0.179968	0.857762	0.95273	-5.45772	1.03661
ANKS3	0.107849	4.24862	1.38115	0.172172	0.453933	-5.23757	1.07762
ANKS4B	0.521768	-5.16673	1.16415	0.248805	0.545878	-4.73825	1.43571
ANKS6	-0.116876	4.85639	-1.27331	0.207645	0.498247	-5.43948	0.922182
ANKUB1	-0.0112976	-4.11231	-0.0297553	0.976357	0.989834	-5.22667	0.9922
ANKZF1	0.3445	5.41853	2.86878	0.00562017	0.08328	-2.47925	1.26971
ANLN	0.220819	0.66249	0.552379	0.582667	0.811188	-5.36997	1.16539
ANO1	0.388887	5.08506	1.78438	0.079236	0.30546	-4.72137	1.30938
ANO10	-0.295318	5.42859	-3.3724	0.00128566	0.0416733	-1.15703	0.814893
ANO2	-0.113569	3.24116	-0.495623	0.621906	0.834314	-5.85122	0.924298
ANO3	-0.057549	2.80743	-0.210086	0.834287	0.942659	-5.85905	0.960895
ANO4	-0.284233	-0.0694725	-0.829819	0.409812	0.690578	-5.12044	0.821178
ANO5	-0.216383	0.551621	-0.69424	0.490115	0.750113	-5.28051	0.860721
ANO6	-0.154517	7.47364	-1.36425	0.177401	0.46075	-5.29113	0.898433
ANO7	-0.369789	-0.451213	-1.70002	0.094119	0.336665	-4.23819	0.773896
ANO8	-0.27069	4.76772	-1.73588	0.0875331	0.322766	-4.77759	0.828923
ANO9	0.688421	1.01567	2.79847	0.0068264	0.0918724	-2.38587	1.61152
ANP32A	-0.161226	6.27724	-2.0693	0.0426761	0.223135	-4.228	0.894265
ANP32B	0.00673024	7.29894	0.0660367	0.94756	0.978347	-6.19324	1.00468
ANP32D	-0.360531	-6.23076	-1.04635	0.299448	0.596785	-4.83294	0.778878
ANP32E	0.0255453	5.22885	0.267518	0.789955	0.921983	-6.21211	1.01786
ANPEP	0.339119	7.28985	1.40526	0.164916	0.444864	-5.24912	1.26498
ANTXR1	0.601745	7.30282	2.88809	0.00532513	0.0811042	-2.39071	1.51755
ANTXR2	-0.329556	7.42118	-1.61806	0.110707	0.363941	-4.93918	0.795781
ANTXRL	-0.789643	-4.0473	-1.11288	0.270039	0.566701	-4.78145	0.578487
ANXA1	-0.126158	9.33822	-0.710406	0.480106	0.74309	-5.80634	0.916268
ANXA10	0.480905	-5.94456	1.24626	0.217339	0.50952	-4.6693	1.39562
ANXA11	-0.256999	8.44556	-3.33645	0.00143495	0.0434129	-1.18088	0.836827
ANXA13	0.781723	-5.23066	1.59727	0.115271	0.370992	-4.32018	1.71918
ANXA2	-0.119831	9.91404	-0.902665	0.370184	0.65982	-5.61945	0.920296
ANXA2R	0.375749	2.20497	2.33421	0.0228273	0.160793	-3.37489	1.29751
ANXA3	-0.644003	4.72033	-1.88371	0.0642783	0.275285	-4.52596	0.639935
ANXA4	0.157534	6.20267	1.16445	0.248684	0.545775	-5.59877	1.11538
ANXA5	-0.356455	9.2802	-2.81029	0.00660816	0.0899771	-2.49152	0.781082
ANXA6	-0.588553	8.82206	-4.58798	2.22003e-05	0.00970761	2.58807	0.66501
ANXA7	-0.0736579	7.24117	-1.10249	0.274492	0.57085	-5.61265	0.950226
ANXA8	0.109612	-6.3624	0.353687	0.724769	0.891259	-5.18309	1.07894
ANXA8L1	-1.08097	-5.3755	-2.11743	0.038226	0.211493	-3.66541	0.472712
ANXA9	0.147694	0.912777	0.712273	0.478957	0.742161	-5.31953	1.1078
AOAH	0.235765	2.1792	0.896266	0.373564	0.66236	-5.38998	1.17753
AOC1	0.345726	-3.84388	0.596277	0.553153	0.793062	-5.09893	1.27079
AOC2	-0.172364	2.9499	-0.799289	0.427162	0.70386	-5.60935	0.887388
AOC3	-0.559427	9.21991	-2.99295	0.00395837	0.0701114	-2.04848	0.678572
AOX1	-0.196201	7.73276	-0.586354	0.559758	0.797662	-5.99858	0.872846
AP000350.4	0.0933034	-0.790375	0.188727	0.850921	0.9492	-5.30065	1.06681
AP000351.3	0.041709	-6.81588	0.3111	0.756764	0.906068	-5.19618	1.02933
AP1AR	0.00663661	4.40833	0.0858383	0.93187	0.975006	-6.16747	1.00461
AP1B1	-0.0748766	6.57964	-0.749875	0.456155	0.722865	-5.96586	0.949423
AP1G1	-0.0477269	6.63147	-0.675323	0.501972	0.75962	-6.01472	0.967459
AP1G2	0.229633	3.85008	1.97401	0.0528235	0.250044	-4.2646	1.17254
AP1M1	-0.266581	6.42698	-2.41625	0.0186277	0.145646	-3.52067	0.831287
AP1M2	0.449925	-2.40255	0.782881	0.436666	0.710593	-5.01023	1.36597
AP1S1	-0.116353	4.03008	-1.07855	0.284949	0.582449	-5.55764	0.922517
AP1S2	-0.14267	5.01223	-1.14956	0.254723	0.552598	-5.5944	0.905841
AP1S3	0.402897	-0.317407	2.241	0.0286031	0.182255	-3.45357	1.32216
AP2A1	-0.152152	7.04419	-1.84037	0.0704818	0.288822	-4.60444	0.899907
AP2A2	-0.0701647	6.85964	-0.798604	0.427557	0.704089	-5.91392	0.952529
AP2B1	-0.0282421	7.60478	-0.450381	0.654001	0.854445	-6.07573	0.980614
AP2M1	-0.191857	8.24564	-2.83992	0.00608927	0.0864497	-2.46574	0.875478
AP2S1	-0.330938	5.94347	-2.50085	0.0150356	0.130527	-3.34664	0.795019
AP3B1	-0.105598	5.71785	-1.96173	0.0542699	0.25387	-4.43419	0.92942
AP3B2	-0.0301888	0.91097	-0.0979404	0.922294	0.975006	-5.53266	0.979292
AP3D1	-0.196574	7.0345	-2.30392	0.0245785	0.16837	-3.73095	0.87262
AP3M1	-0.284602	5.50736	-4.38712	4.52116e-05	0.0116531	1.91226	0.820968
AP3M2	0.197421	4.55913	1.67517	0.0989188	0.345779	-4.85402	1.14665
AP3S1	0.0754935	6.17656	0.982114	0.329846	0.623057	-5.78756	1.05372
AP3S2	-0.323465	5.92558	-3.93856	0.000209768	0.02075	0.494963	0.799148
AP4B1	0.104026	4.20048	1.08807	0.280759	0.577797	-5.57318	1.07477
AP4E1	-0.0165158	4.31773	-0.217032	0.828893	0.939998	-6.1357	0.988617
AP4M1	0.0424142	3.83937	0.465486	0.643208	0.847161	-5.97804	1.02984
AP4S1	-0.147353	1.84606	-1.47128	0.146253	0.416878	-4.73453	0.902905
AP5B1	-0.337557	3.03369	-2.10179	0.0396256	0.215433	-3.914	0.79138
AP5M1	-0.247818	4.23901	-2.95972	0.00435148	0.0734614	-2.1826	0.842169
AP5S1	-0.454212	3.0667	-3.20862	0.00210906	0.050918	-1.45073	0.729909
AP5Z1	0.114042	5.72645	1.20307	0.233507	0.52801	-5.56091	1.08226
APAF1	0.179772	4.12449	1.22951	0.223508	0.515918	-5.40672	1.1327
APBA1	0.16144	3.36519	1.10263	0.274434	0.570827	-5.41861	1.1184
APBA2	0.466672	0.967831	2.13299	0.0368761	0.207882	-3.65832	1.38192
APBA3	0.0236213	3.71255	0.232787	0.81669	0.933623	-6.03317	1.01651
APBB1	0.134699	5.41301	1.40469	0.165085	0.445003	-5.30447	1.09786
APBB1IP	-0.45866	5.7668	-2.32515	0.0233392	0.163036	-3.72577	0.727662
APBB2	-0.246346	6.89401	-1.87641	0.0652888	0.276955	-4.5508	0.843029
APBB3	0.242973	5.31363	2.11379	0.0385474	0.212539	-4.14159	1.18343
APC	0.0762159	5.32158	0.832687	0.408205	0.689462	-5.91401	1.05425
APC2	-0.237206	-0.19528	-1.03289	0.305651	0.601637	-4.95702	0.848387
APCDD1	-0.627136	6.14298	-1.58787	0.117383	0.374692	-5.04755	0.647461
APCDD1L	0.466667	-1.71372	0.703628	0.484288	0.746314	-5.06196	1.38191
APCS	-0.447637	-5.71077	-0.995029	0.323575	0.617651	-4.86845	0.733243
APEH	-0.288329	5.53166	-2.86001	0.00575898	0.0841768	-2.50316	0.81885
APEX1	-0.113097	6.72269	-1.17098	0.246072	0.543401	-5.56921	0.924601
APEX2	-0.12328	4.21812	-1.50247	0.138032	0.405282	-5.06954	0.918098
APH1A	0.0515741	6.84511	0.623815	0.535029	0.78122	-6.03519	1.0364
APH1B	0.214499	4.76909	2.21145	0.0306855	0.189496	-3.91835	1.1603
API5	-0.0709106	6.1874	-1.09314	0.278543	0.575546	-5.6764	0.952037
APIP	-0.483977	4.419	-3.5754	0.000682951	0.0307437	-0.541536	0.715004
APLF	0.12268	2.17838	0.987388	0.327275	0.620829	-5.31242	1.08876
APLN	0.609304	2.10643	0.843178	0.402358	0.684944	-5.41894	1.52552
APLNR	0.170483	4.52623	0.3314	0.741455	0.899796	-6.13237	1.12544
APLP1	-0.389921	0.445158	-1.61909	0.110485	0.36383	-4.3949	0.763171
APLP2	0.05241	9.05453	0.762736	0.448502	0.718366	-5.78978	1.037
APMAP	-0.680652	7.30679	-3.0347	0.00351131	0.0663176	-2.02178	0.623883
APOA1	-0.611936	-2.28283	-1.50537	0.137288	0.404307	-4.42238	0.654318
APOA2	0.042697	-4.37711	0.0818976	0.934991	0.975006	-5.22354	1.03004
APOA4	-0.465174	-5.3979	-0.751086	0.455431	0.722423	-5.02048	0.724384
APOA5	-0.0539729	-5.652	-0.141071	0.888269	0.967825	-5.21773	0.96328
APOB	-2.15376	1.97366	-3.46393	0.000969062	0.0365593	-0.782756	0.224725
APOBEC1	-0.0552201	-6.43572	-0.211959	0.832831	0.941688	-5.21278	0.962448
APOBEC2	0.752956	-2.61552	1.84586	0.069669	0.287049	-4.02739	1.68524
APOBEC3A	-0.330667	0.093925	-0.778575	0.43918	0.712385	-5.17218	0.795169
APOBEC3B	0.0278253	-1.99647	0.0510296	0.959465	0.983323	-5.2356	1.01947
APOBEC3C	0.377339	4.54968	2.23175	0.0292413	0.184841	-3.85875	1.29894
APOBEC3D	0.292174	1.49617	1.36774	0.176313	0.459842	-4.81493	1.22448
APOBEC3F	0.620532	1.05216	3.04792	0.00337992	0.0649712	-1.8394	1.53744
APOBEC3G	0.557257	2.27887	2.57921	0.0122789	0.11908	-2.8815	1.47147
APOBEC3H	0.910352	-2.07086	2.03198	0.0464292	0.234	-3.78196	1.8795
APOBEC4	0.151224	-6.13772	0.3604	0.719768	0.887754	-5.17986	1.11051
APOBR	0.159915	2.63847	0.577513	0.565676	0.800121	-5.69047	1.11722
APOC1	-0.178673	3.62888	-0.500166	0.618722	0.831628	-5.92382	0.883515
APOC2	0.324565	-5.86754	0.928359	0.356808	0.647904	-4.91468	1.25229
APOC3	-0.617442	-4.12493	-0.915067	0.363688	0.654098	-4.92437	0.651826
APOC4	0.602258	-4.83872	1.32403	0.190334	0.477389	-4.59825	1.51809
APOD	0.602527	10.3007	2.71013	0.00867901	0.10203	-2.68516	1.51837
APOE	-0.221912	8.31822	-0.949559	0.346009	0.637809	-5.68962	0.857429
APOF	-0.325113	-5.2551	-0.79431	0.430033	0.705857	-4.9964	0.798236
APOH	0.0295103	-5.04236	0.0443499	0.964767	0.984841	-5.22375	1.02067
APOL1	0.285055	5.79181	1.36138	0.178301	0.461971	-5.36751	1.21846
APOL2	-0.635846	5.82649	-3.00359	0.0038397	0.069092	-2.14482	0.643563
APOL3	0.235585	7.4644	1.61113	0.112212	0.366561	-4.94696	1.17738
APOL4	-1.50983	4.43269	-3.51825	0.000817776	0.0339349	-0.704997	0.351153
APOL5	-0.0886797	-3.14381	-0.22641	0.821625	0.93581	-5.21249	0.940383
APOL6	-0.781144	6.79671	-3.07613	0.00311455	0.0623848	-1.93553	0.581905
APOLD1	0.0696765	8.57077	0.24039	0.810818	0.931098	-6.07629	1.04948
APOM	0.125226	1.31496	0.788918	0.433155	0.708684	-5.32914	1.09068
APOO	-0.321758	1.92009	-2.58009	0.0122509	0.118998	-2.85785	0.800094
APOOL	0.161992	1.05917	1.2671	0.209841	0.501305	-4.87289	1.11883
APOPT1	-0.367415	4.70245	-3.3489	0.00138147	0.0427766	-1.19358	0.77517
APP	0.202039	9.22998	2.07161	0.0424527	0.222475	-4.06446	1.15032
APPBP2	-0.160815	5.76362	-2.04817	0.0447676	0.228821	-4.2752	0.894519
APPL1	0.043259	5.91846	0.580775	0.563489	0.798997	-6.09652	1.03044
APPL2	0.0667866	6.22211	0.463097	0.64491	0.847957	-6.14994	1.04738
APRT	-0.340003	5.86809	-2.57819	0.0123118	0.119336	-3.17348	0.79004
APTX	-0.00627868	4.39747	-0.100196	0.920511	0.975006	-6.16471	0.995657
AQP1	0.611522	9.65244	3.07899	0.0030888	0.0621837	-1.81673	1.52787
AQP10	0.334557	-4.03788	0.76178	0.449069	0.71856	-5.01701	1.26099
AQP11	-0.474093	0.925198	-2.81414	0.00653856	0.0895254	-2.3552	0.719919
AQP12A	-0.274596	-6.24588	-0.885555	0.379266	0.665945	-4.94415	0.826682
AQP12B	-0.585689	-6.16592	-1.67178	0.0995875	0.346251	-4.23686	0.666331
AQP2	-0.269181	-5.41938	-0.603312	0.548493	0.789911	-5.09261	0.829791
AQP3	0.139198	2.95751	0.441305	0.660521	0.858261	-5.81871	1.10129
AQP4	-1.15797	-2.29948	-2.14223	0.0360945	0.205661	-3.62763	0.448144
AQP5	0.478998	-3.11752	0.909543	0.366572	0.656469	-4.93134	1.39378
AQP6	-0.174244	-5.28353	-0.326608	0.74506	0.901103	-5.18565	0.886232
AQP7	-1.06345	7.34035	-4.00619	0.000167296	0.0182233	0.729264	0.478485
AQP8	0.586945	-1.79625	1.53084	0.130876	0.394601	-4.39775	1.50206
AQP9	-0.113432	2.47759	-0.268234	0.789406	0.921752	-5.78011	0.924387
AQR	-0.0249308	5.54373	-0.467725	0.641615	0.846479	-6.1519	0.982868
AR	-0.526612	5.68801	-2.46098	0.0166424	0.137751	-3.43479	0.694183
ARAF	-0.13812	6.34337	-1.99545	0.0503759	0.243805	-4.36334	0.908703
ARAP1	0.0411514	6.54972	0.332939	0.7403	0.899149	-6.18697	1.02893
ARAP2	0.343867	3.49139	1.90481	0.0614286	0.269838	-4.33273	1.26915
ARAP3	-0.0436189	6.10104	-0.312449	0.755744	0.905716	-6.21048	0.970218
ARC	0.320201	1.34349	1.171	0.246061	0.543401	-5.00928	1.2485
ARCN1	-0.258467	7.41634	-2.91518	0.00493536	0.0783453	-2.31857	0.835976
AREG	-0.454393	-0.694083	-0.806693	0.422915	0.70071	-5.0725	0.729817
AREL1	-0.0728734	5.04916	-0.90461	0.36916	0.658829	-5.83873	0.950743
ARF1	-0.0973686	8.57286	-1.18807	0.23932	0.535816	-5.43002	0.934736
ARF3	-0.0320008	6.96061	-0.458622	0.648103	0.849773	-6.11507	0.978063
ARF4	-0.274046	7.13065	-2.63401	0.0106329	0.112151	-3.00497	0.826997
ARF5	-0.165293	6.08735	-2.10274	0.0395391	0.215155	-4.16904	0.891747
ARF6	0.0803992	5.64041	0.747223	0.457743	0.724154	-5.98846	1.05731
ARFGAP1	0.100634	6.3595	0.919157	0.361562	0.652331	-5.83911	1.07224
ARFGAP2	-0.120843	6.50551	-1.26134	0.211893	0.504047	-5.47514	0.91965
ARFGAP3	0.00939272	5.9201	0.102503	0.918687	0.975006	-6.25613	1.00653
ARFGEF1	-0.0378638	5.92738	-0.525049	0.601414	0.821886	-6.12644	0.974096
ARFGEF2	-0.00556106	6.11269	-0.0662098	0.947423	0.978347	-6.25581	0.996153
ARFIP1	-0.105109	5.02313	-1.36061	0.178542	0.462248	-5.34286	0.929735
ARFIP2	-0.00398447	5.1985	-0.0452995	0.964014	0.984588	-6.24442	0.997242
ARFRP1	-0.14277	5.17728	-1.38574	0.170773	0.452199	-5.3194	0.905778
ARG1	-0.699902	0.236253	-1.95404	0.0551939	0.256227	-3.91297	0.615614
ARG2	-0.441645	-0.139593	-2.13235	0.0369306	0.20795	-3.62814	0.736295
ARGFX	-0.0400644	-6.68779	-0.191242	0.848958	0.948122	-5.21745	0.972612
ARGLU1	0.232428	7.71401	2.14893	0.0355368	0.204055	-4.00453	1.17481
ARHGAP1	0.175857	7.73388	1.89813	0.0623178	0.271138	-4.46487	1.12964
ARHGAP10	0.262743	6.38513	1.642	0.105635	0.357058	-4.95791	1.19976
ARHGAP11A	0.0892276	1.72624	0.460316	0.646894	0.849344	-5.57714	1.0638
ARHGAP11B	0.072429	0.966261	0.364948	0.716388	0.886257	-5.48791	1.05149
ARHGAP12	0.216747	5.55153	2.17993	0.0330536	0.196628	-4.01901	1.16211
ARHGAP15	0.294719	3.01634	1.15468	0.252635	0.550973	-5.2997	1.22665
ARHGAP17	0.116098	6.13649	1.35009	0.181876	0.466611	-5.3779	1.0838
ARHGAP18	-0.152152	5.05549	-0.991327	0.325364	0.619065	-5.75996	0.899907
ARHGAP19	0.0815977	3.77232	0.792957	0.430816	0.706635	-5.76916	1.05819
ARHGAP19-SLIT1	0.0093906	-6.84186	0.077657	0.93835	0.975006	-5.22944	1.00653
ARHGAP20	-0.253247	5.14563	-1.04434	0.300369	0.597863	-5.71355	0.839006
ARHGAP21	0.14337	7.39014	1.23412	0.221799	0.51457	-5.4566	1.10448
ARHGAP22	0.208455	1.94953	0.733956	0.465731	0.730883	-5.46921	1.15545
ARHGAP23	0.28933	6.16142	2.30383	0.0245839	0.16837	-3.76601	1.22207
ARHGAP24	0.0184778	5.04731	0.144126	0.885867	0.966628	-6.22586	1.01289
ARHGAP25	0.107935	4.19691	0.59681	0.552799	0.792885	-5.96895	1.07768
ARHGAP26	-0.0312723	5.66733	-0.235114	0.814892	0.932849	-6.23405	0.978557
ARHGAP27	0.102432	5.59065	0.898539	0.372361	0.66155	-5.86698	1.07358
ARHGAP28	0.17933	3.8963	0.841495	0.403292	0.685387	-5.75249	1.13236
ARHGAP29	0.111271	7.57066	0.874663	0.38512	0.671486	-5.80677	1.08018
ARHGAP30	0.0149222	4.62096	0.0705246	0.944002	0.977139	-6.19461	1.0104
ARHGAP31	-0.227236	6.42495	-1.83685	0.071008	0.289866	-4.64065	0.85427
ARHGAP32	0.146786	4.95473	1.36672	0.176629	0.460119	-5.32999	1.1071
ARHGAP33	0.431612	4.52125	3.11626	0.00277051	0.0587489	-1.80513	1.34874
ARHGAP35	-0.13416	6.50276	-1.00839	0.317172	0.612192	-5.75017	0.9112
ARHGAP36	-0.819506	-5.32207	-1.64482	0.105049	0.355932	-4.26703	0.566636
ARHGAP39	0.166298	2.53925	0.874151	0.385396	0.671554	-5.47299	1.12218
ARHGAP4	0.0434657	5.91716	0.283497	0.777736	0.915737	-6.22196	1.03059
ARHGAP40	0.132906	-4.6752	0.238157	0.812541	0.932135	-5.20446	1.0965
ARHGAP42	0.0653996	4.2114	0.502146	0.617337	0.83062	-6.02133	1.04637
ARHGAP44	0.331141	3.02099	1.96449	0.0539418	0.252982	-4.15836	1.25801
ARHGAP5	-0.0695059	6.06574	-0.815004	0.418178	0.696644	-5.93545	0.952964
ARHGAP6	0.363462	5.49353	3.40019	0.00118044	0.0403931	-1.08089	1.28651
ARHGAP8	0.951219	1.19111	2.65703	0.0100034	0.109291	-2.67902	1.93351
ARHGAP9	0.16947	3.73175	0.73476	0.465245	0.730566	-5.80426	1.12465
ARHGDIA	-0.114803	7.50698	-0.962484	0.339531	0.632538	-5.73363	0.923508
ARHGDIB	0.258493	7.24217	1.57386	0.120589	0.38039	-5.016	1.19623
ARHGDIG	-0.118375	-0.157316	-0.375553	0.708526	0.882752	-5.33023	0.921225
ARHGEF1	0.0575155	7.28386	0.657637	0.513196	0.766307	-5.98636	1.04067
ARHGEF10	0.117821	6.20188	1.25286	0.214942	0.507474	-5.49663	1.08509
ARHGEF10L	0.250165	6.2982	2.21155	0.0306783	0.189496	-3.95046	1.18934
ARHGEF11	0.029848	6.36873	0.510422	0.611561	0.827228	-6.12213	1.0209
ARHGEF12	0.102628	7.42587	1.17596	0.244091	0.541372	-5.52093	1.07373
ARHGEF15	-0.14578	7.08858	-0.754541	0.45337	0.721324	-5.93291	0.90389
ARHGEF16	-0.781156	2.7222	-2.92886	0.00474875	0.0770409	-2.1234	0.5819
ARHGEF17	0.0718367	7.58046	0.621973	0.536231	0.781781	-5.98834	1.05105
ARHGEF18	-0.0224381	5.08979	-0.300738	0.764616	0.909962	-6.19464	0.984567
ARHGEF19	0.192577	3.08896	1.10998	0.271278	0.567683	-5.35993	1.1428
ARHGEF2	-0.188782	6.77003	-1.70691	0.0928237	0.333597	-4.83887	0.877346
ARHGEF25	0.44897	4.70747	2.37128	0.0208352	0.153981	-3.58502	1.36507
ARHGEF26	-0.369464	4.61698	-1.4744	0.145414	0.41582	-5.15589	0.77407
ARHGEF28	0.12133	4.39115	0.669643	0.505562	0.762028	-5.95152	1.08774
ARHGEF3	0.316822	5.2308	1.78181	0.0796591	0.306222	-4.73327	1.24558
ARHGEF33	0.258415	-0.657885	1.21819	0.22775	0.521422	-4.75688	1.19616
ARHGEF35	0.335766	-0.229229	0.922757	0.359697	0.650507	-5.03876	1.26205
ARHGEF37	0.151022	3.67354	0.608228	0.545249	0.788355	-5.87477	1.11036
ARHGEF38	0.384686	-5.14432	0.869656	0.38783	0.673707	-4.95144	1.30558
ARHGEF39	0.0236881	2.91005	0.154808	0.877473	0.962061	-5.88937	1.01655
ARHGEF4	-0.368196	3.03716	-1.94978	0.0557111	0.257201	-4.18627	0.774751
ARHGEF40	-0.201178	7.00437	-1.54088	0.128416	0.390693	-5.07824	0.86984
ARHGEF5	0.05911	2.0765	0.435652	0.664597	0.860497	-5.64957	1.04182
ARHGEF6	-0.434784	6.58002	-2.55772	0.0129852	0.121674	-3.20307	0.739805
ARHGEF7	0.00669142	7.44549	0.0560391	0.95549	0.981263	-6.18379	1.00465
ARHGEF9	0.298109	4.38749	2.20906	0.03086	0.189835	-3.88791	1.22953
ARID1A	-0.0873906	6.76411	-1.28322	0.204174	0.494281	-5.43562	0.941224
ARID1B	0.0402081	6.44455	0.640481	0.524211	0.77326	-6.04608	1.02826
ARID2	0.0806213	5.00483	1.0683	0.289512	0.587174	-5.68019	1.05747
ARID3A	-0.299781	4.09749	-1.69505	0.0950648	0.338341	-4.76694	0.812376
ARID3B	0.172242	3.01622	1.52352	0.132693	0.397557	-4.84737	1.12681
ARID3C	-0.0432953	-4.06251	-0.0950294	0.924597	0.975006	-5.22391	0.970436
ARID4A	0.185228	5.50764	2.06835	0.0427683	0.223425	-4.23409	1.137
ARID4B	0.157877	5.80678	2.12924	0.0371975	0.208531	-4.12062	1.11564
ARID5A	0.488598	6.1014	2.04718	0.044868	0.229139	-4.27413	1.40308
ARID5B	0.268163	7.48589	1.46324	0.148433	0.419768	-5.15852	1.20427
ARIH1	0.00988618	6.40253	0.15127	0.880252	0.963627	-6.23675	1.00688
ARIH2	-0.190889	6.22005	-2.41046	0.0188996	0.146552	-3.53936	0.876066
ARIH2OS	0.0312384	0.938907	0.192674	0.847841	0.947859	-5.52512	1.02189
ARL1	-0.092231	5.90439	-1.02176	0.310849	0.607104	-5.75439	0.938071
ARL10	0.230921	3.73923	1.18632	0.240006	0.536509	-5.39501	1.17358
ARL11	-0.313037	0.520741	-1.15278	0.253407	0.551016	-4.92565	0.804946
ARL13A	0.445183	-3.58951	1.17763	0.243426	0.540557	-4.73006	1.36149
ARL13B	0.1302	3.66841	1.35975	0.178815	0.462713	-5.17641	1.09445
ARL14	-0.353849	-6.44348	-1.24121	0.219186	0.511619	-4.67551	0.782494
ARL14EP	-0.0112381	4.30522	-0.153585	0.878434	0.962653	-6.14537	0.992241
ARL14EPL	0.141641	-3.50942	0.299635	0.765454	0.910485	-5.19693	1.10316
ARL15	0.0951218	4.29527	0.639837	0.524627	0.773749	-5.9573	1.06816
ARL16	0.00989172	4.5021	0.110853	0.912089	0.975006	-6.17689	1.00688
ARL17A	0.12262	0.419333	0.50928	0.612357	0.827632	-5.35572	1.08871
ARL17B	0.103169	-0.0526852	0.233451	0.816177	0.93327	-5.37824	1.07413
ARL2	0.0304823	6.39849	0.34733	0.729515	0.894121	-6.18914	1.02135
ARL2BP	-0.0926127	5.61621	-1.33328	0.187299	0.474003	-5.40217	0.937823
ARL3	0.0641097	4.53921	0.764685	0.447349	0.717558	-5.90399	1.04544
ARL4A	0.186992	4.8038	1.29064	0.201603	0.490342	-5.41379	1.13839
ARL4C	0.71008	4.82468	3.02551	0.00360552	0.0672589	-2.05982	1.63589
ARL4D	-0.361879	2.99782	-1.4795	0.144051	0.414039	-4.90433	0.778151
ARL5A	-0.188922	5.27228	-2.49935	0.0150933	0.130745	-3.34099	0.877261
ARL5B	0.287636	5.00741	1.32811	0.18899	0.476184	-5.38322	1.22064
ARL5C	0.420847	-5.29006	0.898117	0.372585	0.661757	-4.93345	1.33871
ARL6	-0.0260345	1.15415	-0.178154	0.859181	0.953118	-5.56138	0.982116
ARL6IP1	-0.38474	7.18418	-3.10974	0.00282385	0.0597417	-1.83287	0.765917
ARL6IP4	-0.0548568	6.47818	-0.647884	0.519443	0.769492	-6.03996	0.96269
ARL6IP5	-0.276899	7.3225	-2.31682	0.0238188	0.165278	-3.68932	0.825363
ARL6IP6	0.17831	4.23929	1.80083	0.0765747	0.301162	-4.6152	1.13156
ARL8A	-0.0251716	5.67389	-0.309312	0.758117	0.90681	-6.21437	0.982704
ARL8B	-0.0520938	6.49907	-0.7674	0.445745	0.716704	-5.95694	0.964535
ARL9	1.55349	-3.41542	3.27509	0.00172818	0.0460487	-1.69706	2.93526
ARMC1	-0.0723997	4.85488	-1.04167	0.301596	0.598919	-5.69544	0.951055
ARMC10	-0.024005	4.77906	-0.354285	0.724322	0.890979	-6.15223	0.983499
ARMC12	0.0680747	0.376629	0.241584	0.809897	0.930974	-5.43368	1.04832
ARMC2	-0.0974627	2.34869	-0.7905	0.432238	0.707897	-5.50142	0.934675
ARMC3	-0.701035	-5.84628	-1.94088	0.0568049	0.259553	-3.90524	0.615131
ARMC4	1.62703	-2.56854	3.16559	0.00239624	0.0544613	-1.90336	3.08876
ARMC5	-0.152187	3.80153	-1.49309	0.140466	0.408638	-5.02145	0.899885
ARMC6	-0.375204	4.18823	-2.83562	0.00616215	0.086923	-2.48345	0.770996
ARMC7	0.123782	3.29283	0.908708	0.367009	0.656912	-5.58772	1.08959
ARMC8	-0.295585	5.92548	-2.12474	0.0375862	0.20986	-4.12885	0.814742
ARMC9	0.289238	2.15547	1.79838	0.0769658	0.301557	-4.31152	1.22199
ARMCX1	0.21965	5.19084	1.88061	0.0647057	0.275889	-4.56363	1.16445
ARMCX2	0.259199	4.24975	1.72587	0.0893331	0.326633	-4.73841	1.19681
ARMCX3	-0.0394967	6.10954	-0.562178	0.576014	0.806138	-6.10366	0.972994
ARMCX4	0.261753	4.64007	2.1839	0.0327468	0.195711	-3.96233	1.19893
ARMCX5	0.0977313	3.39838	1.125	0.264909	0.561482	-5.40139	1.07009
ARMCX6	0.00286588	3.12482	0.0213619	0.983025	0.993059	-5.94411	1.00199
ARMS2	0.84631	-2.57787	1.82873	0.0722326	0.292187	-4.04894	1.7979
ARNT	0.158458	6.63463	2.07608	0.0420234	0.221558	-4.20155	1.11609
ARNT2	0.921529	1.79818	2.68774	0.0092164	0.10424	-2.62506	1.89412
ARNTL	-0.624459	5.05986	-2.4392	0.017584	0.141481	-3.46325	0.648663
ARNTL2	0.0700495	2.75493	0.287134	0.774963	0.915082	-5.83054	1.04975
ARPC1A	-0.210689	6.17698	-2.48701	0.0155767	0.132119	-3.37351	0.864125
ARPC1B	-0.0721717	6.38403	-0.501309	0.617922	0.831018	-6.12599	0.951205
ARPC2	-0.0892758	8.12982	-1.05441	0.295773	0.593384	-5.60268	0.939995
ARPC3	-0.179977	7.03941	-2.34805	0.0220644	0.158656	-3.63885	0.882717
ARPC4	-0.0754388	6.92627	-1.14952	0.254739	0.552598	-5.58149	0.949053
ARPC5	-0.0950948	6.89483	-0.996001	0.323106	0.617207	-5.74114	0.936211
ARPC5L	-0.243825	5.14368	-1.93613	0.0573965	0.26129	-4.46348	0.844503
ARPP19	-0.122522	7.28706	-1.48077	0.143713	0.41371	-5.14667	0.91858
ARPP21	0.001322	-2.5144	0.002355	0.998129	0.999229	-5.23293	1.00092
ARR3	0.866146	-3.22604	2.5593	0.012932	0.121536	-2.98651	1.82279
ARRB1	-0.483848	5.60694	-3.77582	0.000358659	0.0237958	0.00333825	0.715068
ARRB2	0.182893	5.81857	1.01312	0.314927	0.610512	-5.7632	1.13516
ARRDC1	-0.00900288	5.30681	-0.0817034	0.935145	0.975006	-6.2476	0.993779
ARRDC2	0.16526	6.97224	0.785887	0.434916	0.709544	-5.91686	1.12137
ARRDC3	0.520855	6.55708	1.67771	0.0984192	0.345327	-4.89535	1.43481
ARRDC4	0.0115983	4.45707	0.0563445	0.955248	0.981263	-6.17579	1.00807
ARRDC5	0.0463188	-2.31819	0.143422	0.88642	0.966901	-5.22625	1.03263
ARSA	-0.100078	5.50724	-1.14891	0.25499	0.552815	-5.61853	0.932983
ARSB	-0.000947656	3.95571	-0.00852461	0.993226	0.997587	-6.10241	0.999343
ARSD	-0.312575	5.1833	-1.84266	0.0701425	0.287998	-4.6286	0.805203
ARSE	0.853118	-3.59772	1.61503	0.111363	0.365117	-4.30176	1.8064
ARSF	-0.0729433	-5.95828	-0.177267	0.859874	0.953448	-5.21468	0.950696
ARSG	0.0161009	2.82182	0.135456	0.892689	0.970602	-5.87406	1.01122
ARSH	0.298715	-6.41568	1.08646	0.281465	0.578612	-4.8033	1.23005
ARSI	0.312978	-0.53282	0.559993	0.577494	0.807406	-5.21916	1.24227
ARSJ	0.684653	1.91091	2.63363	0.0106436	0.112199	-2.74474	1.60732
ARSK	0.210545	2.74865	1.55468	0.125094	0.387003	-4.75933	1.15713
ART1	0.419924	-5.79067	0.920237	0.361002	0.651705	-4.91981	1.33786
ART3	0.910757	-0.714367	2.31904	0.0236899	0.164597	-3.33348	1.88003
ART4	1.24279	1.32211	3.55726	0.000723273	0.0318948	-0.596065	2.36656
ART5	1.14805	-1.76092	3.18678	0.00225055	0.0527338	-1.84667	2.21615
ARTN	0.377199	-0.702179	1.25632	0.213696	0.505839	-4.71809	1.29882
ARV1	-0.131863	3.45876	-1.61743	0.110843	0.364066	-4.78723	0.912652
ARVCF	0.389062	4.1929	2.0128	0.0484671	0.238619	-4.23998	1.30954
ARX	-0.257761	-5.78135	-0.645919	0.520706	0.770512	-5.07415	0.836385
AS3MT	0.280104	2.32199	1.39028	0.169395	0.450703	-4.90703	1.21428
ASAH1	-0.137421	8.21139	-0.717352	0.475841	0.739381	-5.88245	0.909143
ASAH2	-1.03031	-2.53011	-2.29418	0.025167	0.170513	-3.40413	0.489604
ASAH2B	-0.133672	0.619444	-0.834991	0.406916	0.688668	-5.19939	0.911508
ASAP1	0.163222	7.11303	1.34935	0.182113	0.466891	-5.3328	1.11979
ASAP2	0.147223	4.77977	1.07751	0.285411	0.582926	-5.65226	1.10744
ASAP3	0.31684	5.93595	2.4446	0.0173463	0.140346	-3.47036	1.2456
ASB1	-0.00700228	5.12683	-0.0724405	0.942484	0.976425	-6.23858	0.995158
ASB10	0.506361	-5.35509	1.06585	0.290611	0.588245	-4.81601	1.42046
ASB11	1.21341	-3.38112	3.06809	0.00318815	0.0630383	-2.09182	2.31885
ASB12	0.275082	-6.30398	0.984691	0.328588	0.622114	-4.87803	1.21006
ASB13	-0.0853243	4.82081	-0.446466	0.65681	0.856221	-6.12031	0.942573
ASB14	0.332805	0.944198	2.23612	0.0289382	0.183496	-3.47862	1.25946
ASB15	-0.0570084	-5.58319	-0.122834	0.902635	0.974928	-5.2193	0.961255
ASB16	0.100566	-0.114898	0.468314	0.641196	0.846235	-5.30384	1.07219
ASB17	-0.158768	-6.71377	-0.711444	0.479467	0.742574	-5.04688	0.89579
ASB18	0.468523	-6.01453	1.30619	0.196295	0.484845	-4.61559	1.38369
ASB2	0.881822	1.29915	2.07567	0.0420629	0.221575	-3.77517	1.8427
ASB4	-0.67899	-2.83625	-1.8564	0.0681316	0.28301	-4.01404	0.624603
ASB5	0.259376	-3.49801	0.429661	0.668926	0.86231	-5.16244	1.19696
ASB6	-0.22145	3.93006	-2.82602	0.0063278	0.0875936	-2.48086	0.857703
ASB7	-0.0402176	3.663	-0.499718	0.619036	0.831928	-5.9303	0.972508
ASB8	-0.089057	4.94938	-1.37876	0.172904	0.454907	-5.31394	0.940137
ASB9	0.149258	0.918129	0.798913	0.427379	0.704015	-5.26446	1.109
ASCC1	0.040706	4.60558	0.452723	0.652323	0.853198	-6.09555	1.02862
ASCC2	-0.232432	6.13142	-3.69687	0.000463277	0.026006	-0.229474	0.851199
ASCC3	-0.0172655	4.91375	-0.167975	0.867148	0.956949	-6.21177	0.988104
ASCL1	0.483118	-4.00684	0.943419	0.349114	0.640224	-4.90588	1.39776
ASCL2	0.667705	-1.22261	1.97404	0.0528198	0.250044	-3.85898	1.58854
ASCL3	0.505769	-6.01668	1.32966	0.188485	0.475287	-4.59385	1.41988
ASCL4	0.355299	-4.91156	0.657586	0.513229	0.766307	-5.06801	1.27925
ASCL5	-0.124437	-4.74977	-0.29172	0.771471	0.913308	-5.19397	0.917362
ASF1A	-0.0985554	3.32081	-0.980171	0.330797	0.623821	-5.5297	0.933968
ASF1B	-0.0715365	0.0645465	-0.219808	0.82674	0.938836	-5.39582	0.951624
ASGR1	-0.0537264	0.465606	-0.247784	0.805118	0.929158	-5.44484	0.963445
ASGR2	-0.0310622	-0.0919372	-0.0998181	0.92081	0.975006	-5.39133	0.978699
ASH1L	0.0180107	6.69125	0.199144	0.842799	0.945456	-6.21426	1.01256
ASH2L	-0.382869	5.47297	-3.99303	0.00017485	0.018656	0.66413	0.766911
ASIC1	0.447712	0.932005	1.23746	0.220564	0.5134	-4.88884	1.36388
ASIC2	0.378126	-5.10246	0.742838	0.460375	0.726343	-5.02485	1.29965
ASIC3	0.124765	1.93248	0.827971	0.41085	0.691003	-5.40042	1.09033
ASIC4	0.631773	-1.72858	1.63454	0.107193	0.359207	-4.28339	1.54947
ASIC5	0.235631	-6.65998	1.09843	0.276249	0.57317	-4.79503	1.17742
ASIP	1.30416	-1.42755	3.10395	0.00287206	0.0600154	-1.97998	2.4694
ASL	-0.140605	5.04446	-1.45505	0.150681	0.423083	-5.2185	0.907139
ASMT	0.0093906	-6.84186	0.077657	0.93835	0.975006	-5.22944	1.00653
ASMTL	0.0093906	-6.84186	0.077657	0.93835	0.975006	-5.22944	1.00653
ASNA1	-0.134259	5.57573	-1.49272	0.140563	0.40882	-5.18785	0.911138
ASNS	0.161436	4.37213	0.99658	0.322827	0.616867	-5.68735	1.1184
ASNSD1	-0.0371954	5.28727	-0.452417	0.652541	0.853331	-6.15002	0.974548
ASPA	0.126895	3.55938	0.391838	0.696517	0.876513	-5.95694	1.09194
ASPDH	0.157124	-2.80501	0.41665	0.678368	0.866863	-5.16885	1.11506
ASPG	-0.551627	-1.03974	-0.862086	0.39195	0.677371	-5.00845	0.68225
ASPH	-0.253092	8.59225	-1.43896	0.155172	0.430316	-5.11935	0.839096
ASPHD1	0.636473	-0.747275	1.68495	0.0970066	0.342575	-4.24586	1.55452
ASPHD2	0.427951	0.496257	2.438	0.0176372	0.141612	-3.10636	1.34532
ASPM	0.189965	-0.149535	0.441224	0.66058	0.858261	-5.30958	1.14074
ASPN	0.869619	4.41882	2.70955	0.00869253	0.102035	-2.80542	1.82718
ASPRV1	0.24856	1.94545	1.17249	0.24547	0.542963	-5.09565	1.18802
ASPSCR1	-0.159229	4.58389	-1.7533	0.0844742	0.316648	-4.73224	0.895504
ASRGL1	0.103582	3.69901	0.410288	0.683003	0.869608	-5.97589	1.07444
ASS1	-0.63503	7.80344	-3.70649	0.000449108	0.0256833	-0.157284	0.643928
ASTE1	0.0228233	2.71093	0.200746	0.841552	0.9451	-5.84136	1.01595
ASTL	0.437341	-4.17265	0.767118	0.445912	0.716812	-5.0136	1.35411
ASTN1	-0.159404	-2.46325	-0.356494	0.722676	0.889733	-5.18657	0.895395
ASTN2	-0.112259	1.18785	-0.568204	0.571941	0.803646	-5.43993	0.925138
ASXL1	0.086439	7.38284	0.974895	0.333386	0.626511	-5.73034	1.06175
ASXL2	-0.0906244	5.28592	-0.984154	0.32885	0.622114	-5.77967	0.939116
ASXL3	0.634109	1.05133	2.49475	0.0152721	0.131017	-3.00204	1.55198
ASZ1	-0.0899163	-6.7899	-0.596819	0.552793	0.792885	-5.10161	0.939577
ATAD1	0.0419178	5.50424	0.60938	0.544491	0.788243	-6.07665	1.02948
ATAD2	0.0360954	3.67409	0.295815	0.768356	0.911566	-6.01005	1.02534
ATAD2B	0.0793136	4.68122	0.850205	0.39847	0.682238	-5.85312	1.05652
ATAD3A	-0.248567	4.32841	-1.9185	0.0596374	0.26598	-4.42504	0.841732
ATAD3B	0.060552	4.52227	0.418486	0.677033	0.86617	-6.10017	1.04286
ATAD3C	0.0736148	0.357646	0.23187	0.8174	0.933924	-5.43297	1.05235
ATAD5	0.137659	2.11659	0.879368	0.382584	0.669084	-5.3926	1.10012
ATAT1	0.161695	3.39511	1.56639	0.122328	0.383003	-4.85116	1.1186
ATCAY	-1.05762	-3.53328	-2.28868	0.0255044	0.171529	-3.41396	0.480423
ATE1	-0.0204813	5.06378	-0.290576	0.772342	0.913748	-6.19589	0.985904
ATF1	-0.0448869	4.36459	-0.466303	0.642627	0.846901	-6.05961	0.969366
ATF2	0.0159866	5.75427	0.212003	0.832798	0.941688	-6.23967	1.01114
ATF3	0.555116	6.09675	1.38096	0.172231	0.454022	-5.33885	1.46929
ATF4	0.000695744	9.171	0.00666522	0.994703	0.998173	-6.05987	1.00048
ATF5	-0.38061	5.50068	-1.41516	0.162007	0.441443	-5.29304	0.768113
ATF6	0.00868998	5.92199	0.108187	0.914195	0.975006	-6.25552	1.00604
ATF6B	0.0823635	6.23723	1.14041	0.258485	0.555589	-5.6243	1.05875
ATF7	0.0349049	6.38249	0.423848	0.673138	0.86439	-6.16101	1.02449
ATF7IP	0.0738918	5.27442	0.629466	0.531348	0.778611	-6.05615	1.05255
ATF7IP2	-0.519065	1.77693	-3.28793	0.00166247	0.0452933	-1.23678	0.697824
ATG10	0.0451876	2.69462	0.458998	0.647835	0.849773	-5.75862	1.03182
ATG12	0.00500052	5.72166	0.0757369	0.939871	0.975425	-6.25874	1.00347
ATG13	-0.0133896	6.40438	-0.150981	0.880479	0.96367	-6.23672	0.990762
ATG14	0.232491	5.44289	2.23904	0.0287373	0.182674	-3.89839	1.17486
ATG16L1	0.0270844	5.06403	0.520571	0.604513	0.823415	-6.10495	1.01895
ATG16L2	0.156998	5.16815	0.787155	0.434178	0.709213	-5.94205	1.11496
ATG2A	0.102512	5.70111	0.769726	0.444374	0.715849	-5.9726	1.07364
ATG2B	0.224595	6.19195	2.35017	0.0219497	0.158142	-3.66844	1.16845
ATG3	-0.138232	5.41808	-1.92605	0.0586686	0.264312	-4.49273	0.908632
ATG4A	-0.15171	3.8095	-1.7672	0.0820962	0.311266	-4.61077	0.900183
ATG4B	0.0224907	5.7763	0.313766	0.754748	0.905079	-6.21354	1.01571
ATG4C	-0.160834	3.24517	-1.15635	0.251956	0.550018	-5.33997	0.894508
ATG4D	-0.128602	3.5552	-1.15397	0.252923	0.551014	-5.39861	0.914718
ATG5	-0.0445547	5.00638	-0.679847	0.499122	0.757793	-6.00788	0.969589
ATG7	-0.0839146	4.53491	-1.1199	0.267061	0.563708	-5.58242	0.943494
ATG9A	-0.168139	6.31913	-1.35337	0.180833	0.465566	-5.36819	0.88999
ATG9B	0.1832	0.688789	0.714709	0.477461	0.740846	-5.28684	1.1354
ATIC	-0.281724	5.49678	-2.64196	0.0104114	0.110903	-3.02411	0.822607
ATL1	0.47287	2.57836	3.01577	0.00370784	0.0679602	-1.90676	1.38787
ATL2	-0.246195	5.30294	-2.78409	0.0071007	0.0929711	-2.68273	0.843117
ATL3	-0.0130453	7.47392	-0.152649	0.879169	0.96317	-6.17201	0.990998
ATM	0.12844	5.78949	1.0486	0.298417	0.595975	-5.72794	1.09311
ATMIN	-0.224445	5.8312	-2.75671	0.00765132	0.096101	-2.75655	0.855925
ATN1	0.0919876	8.67006	1.00106	0.320674	0.615091	-5.61704	1.06584
ATOH1	-0.35864	-6.51549	-1.33536	0.186621	0.473116	-4.59011	0.779899
ATOH7	0.459715	-2.72032	1.06305	0.291866	0.589564	-4.82356	1.37527
ATOH8	-0.0172517	6.41062	-0.0684883	0.945617	0.977892	-6.24531	0.988113
ATOX1	-0.201123	4.88217	-2.0506	0.0445227	0.228353	-4.23799	0.869873
ATP10A	-0.714409	4.89542	-2.34293	0.0223436	0.159132	-3.65856	0.609455
ATP10B	0.143435	-3.27881	0.255922	0.798855	0.926253	-5.20677	1.10453
ATP10D	0.276061	4.85774	2.67176	0.00961862	0.106695	-2.92777	1.21088
ATP11A	0.173731	5.56754	1.81556	0.0742558	0.296311	-4.68756	1.12797
ATP11B	-0.102512	5.91326	-1.18145	0.241918	0.538445	-5.58537	0.93141
ATP11C	0.202154	5.44531	2.09614	0.0401417	0.216439	-4.17974	1.15041
ATP12A	0.236571	-6.33225	0.626998	0.532954	0.779558	-5.08561	1.17819
ATP13A1	0.134508	6.13168	1.87081	0.066074	0.278671	-4.59147	1.09772
ATP13A2	-0.21516	5.24166	-1.98207	0.0518915	0.247259	-4.38555	0.861451
ATP13A3	-0.332125	7.03406	-2.04238	0.0453563	0.230868	-4.24498	0.794366
ATP13A4	-0.245875	-2.5746	-0.499633	0.619095	0.831933	-5.14163	0.843304
ATP13A5	1.07569	-5.59826	2.22841	0.0294743	0.185355	-3.50564	2.10773
ATP1A1	0.178597	8.17405	1.28234	0.204479	0.494476	-5.34736	1.13178
ATP1A2	-0.594002	6.67534	-1.59585	0.115587	0.371551	-5.01516	0.662502
ATP1A3	0.0315257	-1.44781	0.0982347	0.922062	0.975006	-5.25385	1.02209
ATP1A4	-0.474137	-2.20756	-1.31848	0.192175	0.479436	-4.60834	0.719897
ATP1B1	0.341823	3.33736	1.1732	0.245188	0.542884	-5.33857	1.26736
ATP1B2	0.783699	3.22848	2.38589	0.0200936	0.151344	-3.38411	1.72154
ATP1B3	-0.186873	6.80167	-1.14943	0.254776	0.552614	-5.58872	0.878508
ATP1B4	0.504753	-5.36858	1.06845	0.289445	0.587168	-4.81405	1.41888
ATP2A1	-0.0701466	1.29905	-0.257512	0.797633	0.925716	-5.56977	0.952541
ATP2A2	-0.0323554	7.73941	-0.288175	0.77417	0.91467	-6.12441	0.977823
ATP2A3	0.152776	4.28518	0.824258	0.412941	0.692576	-5.82599	1.11171
ATP2B1	0.256573	5.58582	2.32521	0.0233356	0.163036	-3.72405	1.19464
ATP2B2	-0.0154067	-1.15271	-0.0358013	0.971555	0.987748	-5.27917	0.989378
ATP2B3	0.242697	-3.03593	0.625019	0.534244	0.780479	-5.08928	1.1832
ATP2B4	-0.132543	8.00508	-0.757012	0.451899	0.720415	-5.86899	0.912222
ATP2C1	-0.146275	6.22824	-2.08831	0.040867	0.218462	-4.19327	0.903581
ATP2C2	0.0197651	-2.39229	0.0503579	0.959998	0.983451	-5.23245	1.01379
ATP4A	-1.0904	-2.68491	-2.18606	0.0325807	0.1951	-3.56475	0.46963
ATP4B	-0.236314	-4.64696	-0.457994	0.648552	0.849996	-5.14898	0.848912
ATP5S	-0.237782	3.50495	-2.14608	0.0357729	0.204576	-3.89769	0.848048
ATP6AP1	0.0573727	6.79263	0.783741	0.436165	0.710281	-5.92918	1.04057
ATP6AP1L	-0.342213	2.48991	-1.9198	0.0594696	0.265592	-4.15935	0.78883
ATP6AP2	0.00973159	6.9734	0.139785	0.889281	0.968426	-6.20723	1.00677
ATP6V0A1	0.0568418	5.7811	0.698077	0.487729	0.748148	-6.02397	1.04019
ATP6V0A2	0.0320404	5.03278	0.284131	0.777253	0.915451	-6.1955	1.02246
ATP6V0A4	-0.160508	-5.76497	-0.335553	0.738336	0.897957	-5.18438	0.89471
ATP6V0B	-0.0717018	5.88672	-0.758299	0.451134	0.719957	-5.98125	0.951515
ATP6V0C	-0.0848317	7.09745	-0.646806	0.520136	0.769917	-6.0054	0.942895
ATP6V0D1	-0.143212	6.17669	-1.48369	0.142937	0.412384	-5.19744	0.905501
ATP6V0D2	2.29546	-2.69257	3.14485	0.00254747	0.0568521	-1.94342	4.90911
ATP6V0E1	-0.193271	7.12191	-1.64854	0.10428	0.354508	-4.91071	0.87462
ATP6V0E2	-0.388575	3.90598	-1.98656	0.0513782	0.245632	-4.24986	0.763884
ATP6V1A	-0.147347	5.62623	-1.69749	0.0946003	0.337375	-4.8818	0.902909
ATP6V1B1	0.0738199	0.733214	0.323378	0.747493	0.90206	-5.46518	1.0525
ATP6V1B2	-0.0967492	6.95504	-0.838964	0.4047	0.687006	-5.87628	0.935138
ATP6V1C1	-0.0629773	6.08714	-0.816719	0.417204	0.695974	-5.93368	0.957287
ATP6V1C2	-0.107666	1.62121	-0.47042	0.639699	0.845173	-5.55496	0.928088
ATP6V1D	-0.288854	4.86411	-2.45104	0.0170663	0.139226	-3.4256	0.818552
ATP6V1E1	-0.0916882	6.98749	-1.04397	0.300536	0.597937	-5.68861	0.938424
ATP6V1E2	-0.323155	2.00969	-2.19412	0.0319685	0.19346	-3.62275	0.79932
ATP6V1F	0.0371231	5.91237	0.348442	0.728684	0.893639	-6.20195	1.02607
ATP6V1G1	-0.00240942	5.91578	-0.0274131	0.978218	0.990684	-6.26096	0.998331
ATP6V1G2	0.37176	-0.370811	1.21956	0.227234	0.520712	-4.77724	1.29393
ATP6V1G3	0.0562799	-6.8038	0.404074	0.687544	0.871333	-5.17186	1.03978
ATP6V1H	-0.127797	5.33961	-1.52457	0.132431	0.397263	-5.13583	0.915228
ATP7A	0.0945054	4.11673	1.13174	0.262085	0.558602	-5.51484	1.0677
ATP7B	-0.13952	3.60095	-0.988145	0.326908	0.620349	-5.57384	0.907821
ATP8A1	-0.0432828	4.73081	-0.188676	0.85096	0.9492	-6.19123	0.970444
ATP8A2	-0.746974	-0.734564	-2.43999	0.0175489	0.141411	-3.13313	0.595852
ATP8B1	0.441214	5.06889	2.05151	0.0444308	0.228074	-4.24849	1.35775
ATP8B2	0.38787	6.24217	3.06642	0.00320358	0.0630383	-1.97787	1.30846
ATP8B3	-0.260207	1.33372	-1.2069	0.232038	0.526474	-4.9713	0.834968
ATP8B4	0.124345	4.59737	0.571908	0.569444	0.802336	-6.03535	1.09001
ATP9A	-0.461561	6.73629	-2.128	0.0373044	0.208772	-4.09752	0.7262
ATP9B	0.0488779	4.74407	0.797728	0.428062	0.704327	-5.90107	1.03446
ATPAF1	-0.472568	5.39528	-3.91075	0.000230089	0.021555	0.413013	0.720681
ATPAF2	-0.220205	3.3439	-2.88795	0.00532717	0.0811042	-2.27214	0.858443
ATR	-0.111277	4.96116	-1.32092	0.191363	0.478602	-5.38887	0.925768
ATRAID	-0.106979	6.33448	-1.39412	0.168239	0.449305	-5.31448	0.928531
ATRIP	-0.0349022	3.32192	-0.382862	0.703126	0.879809	-5.91417	0.976098
ATRN	-0.0430335	5.99418	-0.585506	0.560324	0.797718	-6.0928	0.970612
ATRNL1	0.693531	-2.0888	1.73717	0.0873042	0.32237	-4.16148	1.61724
ATRX	0.0283716	6.39049	0.324927	0.746326	0.901859	-6.19683	1.01986
ATXN1	0.1608	5.30368	1.2795	0.20547	0.495924	-5.4601	1.11791
ATXN10	-0.101731	6.15395	-1.30288	0.197416	0.485332	-5.43703	0.931914
ATXN1L	-0.0923267	6.30969	-0.846007	0.40079	0.683473	-5.90347	0.938009
ATXN2	0.078886	5.90719	0.899788	0.371701	0.661107	-5.86744	1.0562
ATXN2L	0.161583	7.16612	2.1207	0.0379385	0.210962	-4.08955	1.11851
ATXN3	0.0248702	4.64086	0.242068	0.809523	0.930854	-6.17072	1.01739
ATXN3L	-0.0267196	-6.73793	-0.152475	0.879305	0.963204	-5.22263	0.98165
ATXN7	0.168748	5.55788	1.58284	0.118527	0.377421	-5.0569	1.12408
ATXN7L1	0.0478077	3.90496	0.438164	0.662785	0.859808	-6.00117	1.03369
ATXN7L2	0.152624	2.84005	1.40685	0.164445	0.444249	-4.97242	1.11159
ATXN7L3	-0.0735034	5.83601	-1.02049	0.311446	0.607684	-5.75596	0.950327
ATXN7L3B	-0.032612	5.89421	-0.606952	0.546091	0.788438	-6.08163	0.977649
AUH	-0.121212	4.07064	-1.37412	0.174334	0.456771	-5.22166	0.919415
AUNIP	-0.407873	-1.59439	-1.96912	0.0533947	0.251532	-3.86632	0.753734
AUP1	-0.0724804	6.64991	-0.731961	0.46694	0.732157	-5.9751	0.951002
AURKA	0.0514041	0.913978	0.231749	0.817493	0.933924	-5.51413	1.03627
AURKAIP1	-0.32752	5.92925	-2.76445	0.00749195	0.0951077	-2.73754	0.796905
AURKB	0.524789	-0.794962	1.20737	0.231859	0.526299	-4.75732	1.43872
AURKC	-0.173226	0.880558	-0.942412	0.349625	0.640807	-5.15327	0.886857
AUTS2	0.345617	5.25107	2.531	0.0139148	0.125839	-3.26972	1.27069
AVEN	-0.427578	3.8036	-3.32215	0.00149875	0.0439547	-1.20293	0.743509
AVIL	-0.37002	1.77343	-1.54825	0.126631	0.38901	-4.62421	0.773772
AVL9	-0.0509559	5.43185	-0.748192	0.457163	0.723771	-5.98294	0.965296
AVP	-1.2938	-2.59531	-2.99896	0.00389091	0.0696028	-2.21637	0.407875
AVPI1	-0.326486	4.85497	-1.65172	0.103628	0.353345	-4.91776	0.797476
AVPR1A	0.124946	3.04184	0.511094	0.611094	0.826944	-5.80427	1.09047
AVPR1B	-0.10418	-5.7046	-0.253098	0.801027	0.92742	-5.20183	0.930334
AVPR2	0.0811059	3.58679	0.372369	0.710883	0.884098	-5.96929	1.05783
AWAT1	0.0654313	-5.87229	0.173901	0.862508	0.954581	-5.21473	1.0464
AWAT2	-0.16036	-5.42202	-0.341842	0.733621	0.895854	-5.18206	0.894802
AXDND1	0.0103085	-3.39573	0.0232623	0.981515	0.99258	-5.23	1.00717
AXIN1	0.0568426	5.12198	0.763852	0.447841	0.717833	-5.95683	1.04019
AXIN2	0.355666	3.73875	1.81763	0.073935	0.295481	-4.51748	1.27958
AXL	0.0791387	7.19236	0.611523	0.543081	0.786887	-6.02074	1.05639
AZGP1	-1.35506	5.28114	-2.87417	0.00553627	0.0823019	-2.46204	0.390919
AZI2	-0.31117	4.72856	-2.29945	0.0248471	0.168971	-3.73663	0.805988
AZIN1	-0.212459	6.77313	-1.86301	0.0671809	0.281246	-4.58017	0.863065
AZU1	-0.489223	-1.59613	-0.986042	0.32793	0.621556	-4.89199	0.712409
B2M	0.273377	11.2191	2.07427	0.0421964	0.221831	-3.95708	1.20863
B3GALNT1	0.166176	2.90918	0.959113	0.341213	0.634186	-5.47088	1.12208
B3GALNT2	-0.0468313	3.12688	-0.380338	0.704989	0.880876	-5.87628	0.96806
B3GALT1	0.0569821	-0.535818	0.321792	0.748688	0.902603	-5.30126	1.04029
B3GALT2	0.267688	-1.24707	0.685303	0.495697	0.75512	-5.09577	1.20388
B3GALT4	-0.0343757	3.6431	-0.264775	0.792058	0.92315	-6.01265	0.976454
B3GALT5	0.049254	-4.79581	0.0871853	0.930804	0.975006	-5.22205	1.03473
B3GALT6	-0.13865	4.10612	-1.32361	0.190473	0.477551	-5.29078	0.908369
B3GAT1	0.0167892	-1.02653	0.0540953	0.957032	0.981929	-5.28994	1.01171
B3GAT2	0.240863	1.73991	1.52935	0.131243	0.395064	-4.64497	1.1817
B3GAT3	-0.0787826	4.92033	-0.8461	0.400738	0.683472	-5.8784	0.946856
B3GNT2	0.0710538	4.72844	0.740177	0.461976	0.727364	-5.94228	1.05048
B3GNT3	0.0321704	-2.29746	0.0743099	0.941002	0.975771	-5.23187	1.02255
B3GNT4	0.358288	-2.11842	1.49046	0.141154	0.409628	-4.43848	1.2819
B3GNT5	-0.337704	3.03941	-1.04767	0.298842	0.596251	-5.41304	0.7913
B3GNT6	-0.562455	-5.76145	-1.56205	0.123347	0.384218	-4.35893	0.677149
B3GNT7	0.395123	1.24764	1.57487	0.120356	0.38014	-4.52653	1.31505
B3GNT8	0.29861	1.18187	1.35232	0.181167	0.465772	-4.79344	1.22996
B3GNT9	0.405692	2.86159	2.18905	0.0323522	0.194376	-3.72732	1.32472
B3GNTL1	-0.0218813	2.04501	-0.194487	0.846428	0.947262	-5.71289	0.984948
B4GALNT1	0.569488	1.05205	2.24359	0.0284264	0.182243	-3.46968	1.484
B4GALNT2	0.38986	-6.40197	1.55197	0.12574	0.387827	-4.37096	1.31027
B4GALNT3	0.612703	-0.5345	1.88387	0.0642559	0.275253	-3.99082	1.52912
B4GALNT4	0.361021	-0.577277	1.06451	0.291209	0.589134	-4.89703	1.28433
B4GALT1	-0.00718437	7.09501	-0.0523046	0.958453	0.982784	-6.20763	0.995033
B4GALT2	-0.297458	5.60503	-2.08087	0.0415671	0.220422	-4.2121	0.813685
B4GALT3	-0.190115	5.02926	-1.62443	0.109338	0.361702	-4.97219	0.876536
B4GALT4	0.0416012	4.33675	0.61297	0.54213	0.78592	-5.97925	1.02926
B4GALT5	-0.0640698	6.26238	-0.419475	0.676314	0.865922	-6.16743	0.956562
B4GALT6	-0.0505613	1.89699	-0.252263	0.801669	0.927698	-5.67403	0.965561
B4GALT7	-0.358029	4.64639	-2.85429	0.00585135	0.0848328	-2.47696	0.78023
B9D1	-0.13457	1.8955	-0.946012	0.347801	0.639102	-5.30072	0.910941
B9D2	0.00648926	1.23696	0.0347617	0.972381	0.988148	-5.58817	1.00451
BAALC	-0.306339	2.97104	-1.50558	0.137234	0.404246	-4.86441	0.808691
BAAT	-0.917907	-4.22405	-2.19264	0.0320805	0.193626	-3.55724	0.529276
BABAM1	-0.140197	5.6543	-2.09952	0.0398324	0.215612	-4.1772	0.907395
BACE1	0.111373	5.83429	1.57327	0.120727	0.380519	-5.0735	1.08026
BACE2	0.600154	6.21168	2.93209	0.00470568	0.0767815	-2.32144	1.51588
BACH1	0.205162	5.47981	1.49669	0.139527	0.407427	-5.18023	1.15282
BACH2	0.460491	2.56791	2.21359	0.030531	0.189232	-3.64454	1.37601
BAD	-0.0259364	4.48295	-0.244347	0.807766	0.930044	-6.15148	0.982183
BAG1	-0.128507	5.98746	-1.06647	0.29033	0.587985	-5.70842	0.914778
BAG2	0.320845	3.9239	1.5185	0.133952	0.399434	-5.00476	1.24906
BAG3	-0.189236	6.44665	-1.26384	0.210999	0.50252	-5.47466	0.87707
BAG4	-0.602874	4.62043	-4.05825	0.000140371	0.0169001	0.888308	0.658441
BAG5	-0.364992	5.93692	-2.78558	0.0070718	0.0929711	-2.68655	0.776473
BAG6	-0.130032	7.69819	-1.98849	0.0511591	0.245495	-4.30646	0.913811
BAHD1	-0.0302606	4.81656	-0.291332	0.771766	0.913362	-6.17566	0.979243
BAIAP2	0.291369	5.11716	1.53539	0.129756	0.392537	-5.10957	1.2238
BAIAP2L1	0.0602947	3.49139	0.38237	0.70349	0.880023	-5.94737	1.04268
BAIAP2L2	-0.364699	2.26215	-1.57916	0.119368	0.378847	-4.64943	0.776631
BAIAP3	-0.203586	2.9051	-0.8106	0.420684	0.698645	-5.59213	0.868389
BAK1	-0.147798	3.37332	-1.3025	0.197545	0.485374	-5.19633	0.902627
BAMBI	0.0578119	1.67407	0.236844	0.813555	0.932135	-5.63779	1.04089
BANF1	-0.222133	5.70458	-2.00575	0.0492349	0.240671	-4.35384	0.857297
BANF2	0.333284	-6.38896	1.02709	0.308352	0.60445	-4.84795	1.25988
BANK1	-0.762354	3.16914	-3.03828	0.00347527	0.0658984	-1.88895	0.589534
BANP	0.272902	3.65053	2.33702	0.0226703	0.160347	-3.53956	1.20824
BAP1	-0.0391762	6.57902	-0.481272	0.632011	0.840783	-6.12657	0.973211
BARD1	0.466422	2.85082	2.81402	0.00654074	0.0895254	-2.40299	1.38168
BARHL1	-0.444381	-5.39727	-1.19977	0.234777	0.529983	-4.70855	0.7349
BARHL2	0.398296	-5.36777	0.779515	0.43863	0.712324	-5.00481	1.31795
BARX1	-0.55496	-4.55852	-1.01934	0.311986	0.607747	-4.85118	0.680676
BARX2	0.222968	-4.461	0.424186	0.672893	0.864197	-5.16031	1.16713
BASP1	0.640326	5.45584	2.28822	0.0255329	0.171562	-3.7983	1.55868
BATF	0.0450226	1.21602	0.17804	0.85927	0.953124	-5.5714	1.0317
BATF2	-0.05741	0.649876	-0.199587	0.842454	0.945195	-5.48044	0.960988
BATF3	-0.128416	1.99641	-0.508045	0.613217	0.828183	-5.60401	0.914835
BAX	0.142736	4.63795	1.27836	0.205868	0.496493	-5.41299	1.104
BAZ1A	-0.0960641	5.62938	-0.93744	0.352156	0.643287	-5.83317	0.935582
BAZ1B	-0.0783122	6.57292	-0.961132	0.340205	0.633471	-5.79157	0.947165
BAZ2A	0.177709	7.58404	1.84593	0.0696588	0.287049	-4.56358	1.13109
BAZ2B	0.050928	5.42091	0.501927	0.61749	0.830704	-6.1323	1.03593
BBC3	0.431605	2.03905	2.35416	0.0217347	0.157523	-3.32201	1.34873
BBIP1	0.1301	4.14992	1.89271	0.0630482	0.272711	-4.44811	1.09437
BBOX1	0.272299	-2.56106	0.498033	0.620216	0.832902	-5.14224	1.20773
BBS1	0.207284	4.97103	2.56073	0.0128843	0.12135	-3.18924	1.15451
BBS10	-0.263254	4.22239	-1.69616	0.0948516	0.337898	-4.78198	0.833206
BBS12	0.142882	2.22297	1.08351	0.282764	0.579915	-5.23046	1.10411
BBS2	0.302333	5.41796	2.50567	0.014851	0.129561	-3.33154	1.23314
BBS4	0.141108	4.31773	2.2891	0.0254783	0.171429	-3.71915	1.10275
BBS5	0.152316	3.93726	1.50927	0.136289	0.40278	-5.01978	1.11135
BBS7	0.217206	4.10123	2.14298	0.0360317	0.205606	-3.98416	1.16248
BBS9	0.0788749	3.90084	0.551378	0.583348	0.811418	-5.94662	1.05619
BBX	0.160171	5.71085	1.74728	0.0855207	0.318853	-4.80263	1.11742
BCAM	0.384582	7.46513	2.33442	0.0228152	0.160793	-3.64517	1.30548
BCAN	0.319426	-1.17278	1.00103	0.320688	0.615091	-4.90255	1.24783
BCAP29	-0.0936534	6.13587	-1.07257	0.287606	0.584801	-5.69924	0.937147
BCAP31	-0.464488	8.22918	-2.57101	0.0125442	0.120245	-3.09359	0.724728
BCAR1	0.144839	6.2147	0.778507	0.43922	0.712385	-5.95971	1.10561
BCAR3	-0.416555	5.46912	-3.78352	0.000349759	0.0236785	0.0278461	0.749211
BCAS1	0.0249472	-0.827619	0.0504964	0.959888	0.983451	-5.30966	1.01744
BCAS2	-0.0630333	4.69673	-0.769975	0.444228	0.715739	-5.91739	0.957249
BCAS3	-0.0871154	4.66186	-0.787729	0.433845	0.709092	-5.90051	0.941403
BCAS4	-0.480695	-0.253598	-1.24726	0.216976	0.509463	-4.76022	0.716632
BCAT1	0.185353	4.98167	0.844027	0.401887	0.684548	-5.88489	1.1371
BCAT2	-0.354008	4.91665	-1.92638	0.0586268	0.264189	-4.46677	0.782407
BCCIP	-0.330592	5.00598	-3.04028	0.00345525	0.0657614	-2.0316	0.79521
BCDIN3D	-0.135418	0.811288	-1.02871	0.307597	0.60365	-5.0726	0.910406
BCHE	0.0690066	0.178217	0.178114	0.859212	0.953118	-5.41767	1.04899
BCKDHA	-0.170218	5.44365	-1.51676	0.134391	0.400025	-5.15066	0.888708
BCKDHB	-0.36946	4.64003	-2.45974	0.0166947	0.137933	-3.38982	0.774072
BCKDK	-0.141309	5.58948	-1.35398	0.180639	0.465395	-5.37524	0.906696
BCL10	0.25793	3.93171	1.9179	0.0597144	0.266076	-4.37504	1.19576
BCL11A	0.371331	-1.45951	1.10878	0.271792	0.568499	-4.80409	1.29355
BCL11B	0.609835	1.11827	2.52406	0.0141657	0.127021	-2.94575	1.52608
BCL2	-0.391769	5.75324	-2.02292	0.0473826	0.236203	-4.32229	0.762194
BCL2A1	0.213693	1.46036	0.512122	0.610378	0.826545	-5.50996	1.15965
BCL2L1	-0.0383194	7.27819	-0.286911	0.775133	0.915082	-6.15667	0.973789
BCL2L10	-1.03455	-3.16331	-2.34221	0.0223834	0.159198	-3.33175	0.488166
BCL2L11	0.291939	4.80536	2.21419	0.0304872	0.189166	-3.91574	1.22428
BCL2L12	-0.0432686	2.75157	-0.368812	0.713519	0.884891	-5.80482	0.970454
BCL2L13	-0.171479	6.23755	-1.21967	0.227193	0.520712	-5.53478	0.887932
BCL2L14	0.427077	-3.86065	1.30929	0.195248	0.483168	-4.61359	1.34451
BCL2L15	0.146603	-2.6386	0.449714	0.654479	0.854912	-5.15875	1.10696
BCL2L2	-0.152393	6.50284	-1.80059	0.0766138	0.301162	-4.69873	0.899757
BCL2L2-PABPN1	-0.331932	-2.59906	-1.474	0.145521	0.415905	-4.45464	0.794472
BCL3	0.224277	5.73823	0.75089	0.455548	0.722466	-5.98668	1.16819
BCL6	-0.125447	8.60436	-0.5916	0.556261	0.795431	-5.93314	0.91672
BCL6B	-0.389696	4.95198	-1.49422	0.140171	0.408464	-5.15744	0.76329
BCL7A	0.119106	3.32249	0.783489	0.436311	0.710365	-5.69309	1.08606
BCL7B	-0.211363	5.95553	-1.76942	0.0817218	0.310704	-4.76575	0.863721
BCL7C	0.141334	4.59926	1.63896	0.106267	0.358167	-4.91412	1.10292
BCL9	0.406203	4.24948	3.76467	0.000371917	0.0240498	0.0176961	1.32519
BCL9L	-0.112296	6.16161	-0.83671	0.405957	0.687806	-5.91573	0.925115
BCLAF1	0.0726277	7.39264	0.924108	0.358999	0.650013	-5.77596	1.05163
BCO2	0.43009	1.07949	2.1004	0.0397523	0.21561	-3.71949	1.34732
BCOR	0.028244	5.0247	0.172994	0.863218	0.954898	-6.21971	1.01977
BCORL1	0.157359	4.52123	1.15162	0.253883	0.551836	-5.54651	1.11524
BCR	-0.158472	6.70836	-1.35964	0.178851	0.462741	-5.3427	0.895974
BCS1L	0.0615527	4.68499	0.695683	0.489217	0.749325	-5.96883	1.04359
BDH1	-0.878424	3.23557	-2.45896	0.0167277	0.138107	-3.23215	0.543961
BDH2	0.445592	4.67159	3.35759	0.00134526	0.0423958	-1.16793	1.36187
BDKRB1	0.3454	-0.631731	0.845162	0.401258	0.684026	-5.05366	1.2705
BDKRB2	0.109447	3.99987	0.334795	0.738905	0.89845	-6.05581	1.07881
BDNF	1.10953	-1.52772	2.10892	0.0389817	0.21371	-3.67108	2.15776
BDP1	0.0385506	5.5004	0.46132	0.646177	0.848951	-6.15382	1.02708
BEAN1	0.515188	-0.0729221	1.81448	0.074423	0.296719	-4.10203	1.42918
BECN1	-0.00981328	5.53052	-0.113458	0.910033	0.975006	-6.25226	0.993221
BEGAIN	0.386364	0.588005	1.20864	0.231371	0.525452	-4.87882	1.3071
BEND2	0.125891	-5.45736	0.281898	0.778957	0.916082	-5.19569	1.09118
BEND3	-0.34379	1.31801	-2.07345	0.0422752	0.222086	-3.78023	0.787969
BEND4	1.43303	-1.53908	2.84227	0.00604966	0.086289	-2.47774	2.70014
BEND5	0.544001	2.42416	4.31288	5.85949e-05	0.0130767	1.63231	1.45801
BEND6	0.914864	0.650482	2.19563	0.0318549	0.19322	-3.53895	1.88539
BEND7	-0.0683932	4.40695	-0.598576	0.551628	0.792245	-5.99715	0.9537
BEST1	-0.112489	4.41699	-0.833534	0.407731	0.689351	-5.83625	0.924991
BEST2	-0.594763	-3.80312	-1.27886	0.205696	0.496264	-4.6415	0.662153
BEST3	0.961526	-4.76577	1.81609	0.0741727	0.296214	-4.06415	1.94737
BEST4	0.766241	-1.06988	3.25861	0.00181603	0.0470458	-1.6301	1.70083
BET1	-0.203827	4.21131	-2.09568	0.0401843	0.216605	-4.08806	0.868244
BET1L	-0.000234777	5.4358	-0.00280381	0.997772	0.999229	-6.25593	0.999837
BEX1	-0.0878792	-1.121	-0.264849	0.792001	0.92315	-5.25584	0.940905
BEX2	0.274074	-0.739889	0.833641	0.407671	0.689351	-5.05141	1.20922
BEX4	0.0117774	4.21067	0.0946475	0.924899	0.975006	-6.13893	1.0082
BEX5	0.629798	0.174669	2.60524	0.01147	0.116031	-2.79981	1.54735
BFAR	-0.108726	5.68945	-1.30125	0.197971	0.485778	-5.44332	0.927407
BFSP1	-0.26064	0.448179	-1.24091	0.219295	0.511744	-4.83154	0.834718
BFSP2	0.538416	-5.83614	1.32679	0.189426	0.476651	-4.5961	1.45238
BGLAP	-0.154857	0.67045	-0.861037	0.392523	0.677895	-5.1875	0.898221
BGN	0.877789	7.53352	3.12074	0.00273434	0.0582834	-1.78991	1.83756
BHLHA15	0.952607	-5.14526	2.0792	0.0417255	0.220879	-3.71885	1.93537
BHLHA9	-0.713813	-5.69005	-1.83147	0.0718174	0.291475	-4.04508	0.609707
BHLHB9	0.316251	2.17703	2.12006	0.0379944	0.211144	-3.7739	1.24509
BHLHE22	0.425486	1.10146	1.46043	0.149202	0.420885	-4.65617	1.34302
BHLHE23	-0.169491	-6.06884	-0.474972	0.636469	0.843341	-5.14471	0.889157
BHLHE40	0.342814	8.01595	0.820739	0.414927	0.693954	-5.81995	1.26823
BHLHE41	-0.0574489	4.66902	-0.228836	0.819747	0.934957	-6.17674	0.960962
BHMT	-0.18829	0.186763	-0.547879	0.585735	0.812599	-5.30837	0.877645
BHMT2	-0.179674	5.07088	-1.01055	0.316144	0.611633	-5.74244	0.882902
BICC1	0.723361	5.43385	3.39465	0.00120074	0.0405172	-1.09527	1.65102
BICD1	0.198239	3.72004	1.23249	0.2224	0.514906	-5.33929	1.1473
BICD2	-0.0781393	5.7468	-1.11703	0.268274	0.564608	-5.65663	0.947279
BID	-0.181351	4.50067	-1.72219	0.0900014	0.32842	-4.77361	0.881877
BIK	-0.0458263	-3.54385	-0.117126	0.907138	0.975006	-5.22452	0.968735
BIN1	-0.252029	6.3528	-1.8249	0.0728151	0.293118	-4.66359	0.839714
BIN2	0.090035	3.21852	0.517605	0.606569	0.824252	-5.83624	1.0644
BIN3	-0.283437	3.93772	-1.99879	0.0500029	0.242977	-4.2322	0.821631
BIRC2	-0.0458198	5.74727	-0.679242	0.499503	0.757889	-6.03649	0.968739
BIRC3	0.74	4.34309	3.13361	0.00263306	0.0574359	-1.74645	1.67018
BIRC5	0.259621	-1.64562	0.483387	0.630517	0.840145	-5.16022	1.19716
BIRC6	-0.00416065	6.61738	-0.0623283	0.950501	0.97948	-6.23573	0.99712
BIRC7	1.23564	-1.40319	2.19496	0.0319054	0.193334	-3.54333	2.35486
BIRC8	-0.0950317	-6.33792	-0.360833	0.719446	0.887626	-5.18107	0.936252
BIVM	-0.0698182	4.57385	-0.80633	0.423123	0.70071	-5.8765	0.952758
BLCAP	-0.520457	6.71991	-3.44396	0.0010311	0.0375133	-0.943916	0.697151
BLID	0.074298	-6.13615	0.198081	0.843627	0.945813	-5.21284	1.05285
BLK	-0.668068	-1.78377	-1.54216	0.128103	0.390455	-4.38567	0.629349
BLM	0.021808	0.661799	0.10215	0.918966	0.975006	-5.49467	1.01523
BLMH	-0.00809159	5.31303	-0.121876	0.90339	0.975006	-6.24386	0.994407
BLNK	0.077351	0.877994	0.192691	0.847829	0.947859	-5.51574	1.05508
BLOC1S1	-0.182117	5.49197	-1.57642	0.119999	0.379473	-5.06508	0.881408
BLOC1S2	-0.0219958	4.60932	-0.203289	0.839572	0.944441	-6.17556	0.984869
BLOC1S3	0.0259408	3.76375	0.293922	0.769795	0.912683	-6.02716	1.01814
BLOC1S4	-0.0330373	3.37077	-0.319288	0.750577	0.903358	-5.94511	0.977361
BLOC1S5	0.0705619	3.8135	0.739122	0.462612	0.728004	-5.81573	1.05013
BLOC1S6	-0.124202	6.06038	-1.21588	0.228624	0.522006	-5.54377	0.917512
BLVRA	-0.166415	5.15849	-1.8866	0.0638812	0.274548	-4.55155	0.891054
BLVRB	-0.219723	5.82295	-1.69017	0.0959978	0.340391	-4.89455	0.85873
BLZF1	-0.184094	4.14012	-2.17499	0.0334389	0.197972	-3.92688	0.880202
BMF	0.581921	3.19445	2.35654	0.0216077	0.157084	-3.4401	1.49684
BMI1	-0.0956548	5.62735	-1.1233	0.265623	0.561953	-5.64879	0.935847
BMP1	-0.380707	6.8223	-2.48734	0.0155636	0.132119	-3.34969	0.768061
BMP10	0.20085	-5.27164	0.393812	0.695066	0.875832	-5.16809	1.14938
BMP15	0.105835	-6.76391	0.729954	0.468157	0.732757	-5.03748	1.07612
BMP2	0.468935	4.44477	2.0983	0.0399442	0.215947	-4.1092	1.38409
BMP2K	0.0264606	3.34292	0.21587	0.829795	0.940496	-5.96592	1.01851
BMP3	0.301252	-0.148891	0.401206	0.689643	0.872262	-5.32323	1.23221
BMP4	0.635983	4.00755	3.47864	0.000925652	0.0358886	-0.788473	1.554
BMP5	0.148131	1.59128	0.473524	0.637496	0.844029	-5.5486	1.10813
BMP6	-0.19296	5.08132	-0.94343	0.349109	0.640224	-5.80622	0.874809
BMP7	0.623448	-0.249356	1.31457	0.193478	0.480934	-4.69349	1.54055
BMP8A	-0.250465	-1.31607	-1.30502	0.196691	0.484845	-4.63815	0.840625
BMP8B	0.0780596	1.32835	0.386123	0.700722	0.878543	-5.5382	1.0556
BMPER	0.18685	2.48539	0.49545	0.622027	0.834355	-5.7014	1.13828
BMPR1A	-0.120263	5.26023	-1.12617	0.264416	0.560995	-5.63452	0.92002
BMPR1B	1.1878	0.467714	2.82945	0.00626818	0.0874595	-2.34271	2.27805
BMPR2	-0.100047	6.94001	-1.11728	0.26817	0.564588	-5.61562	0.933003
BMS1	-0.130456	5.71199	-1.66329	0.101282	0.349677	-4.93648	0.913542
BMX	0.712738	3.55677	3.05776	0.00328507	0.0640535	-1.87281	1.63891
BNC1	0.0742203	-1.65766	0.173879	0.862525	0.954581	-5.2348	1.05279
BNC2	0.350032	4.7784	2.27523	0.026347	0.174532	-3.7903	1.27459
BNIP1	-0.301223	2.77171	-2.80757	0.00665787	0.0904454	-2.41165	0.811564
BNIP2	0.0215756	6.76558	0.311266	0.756638	0.906068	-6.18208	1.01507
BNIP3	-0.253519	5.79329	-1.3633	0.177699	0.461261	-5.36503	0.838848
BNIP3L	-0.543166	8.05135	-3.22962	0.00198095	0.0495213	-1.48238	0.686263
BNIPL	-0.103809	-1.78285	-0.271318	0.787044	0.920515	-5.21427	0.930573
BOC	0.608197	5.6282	4.04298	0.0001478	0.0174074	0.817412	1.52435
BOD1	-0.0301433	5.51869	-0.36928	0.713173	0.884891	-6.19158	0.979323
BOD1L1	0.162601	6.35546	2.17353	0.0335531	0.198187	-4.02413	1.1193
BOD1L2	-0.0448852	-4.93571	-0.0781065	0.937994	0.975006	-5.22236	0.969367
BOK	-0.921543	6.58366	-3.45947	0.000982596	0.0365593	-0.904299	0.527944
BOLA1	-0.224294	3.19421	-2.21414	0.030491	0.189166	-3.7236	0.856014
BOLA2	-0.256333	-1.45222	-1.20554	0.232559	0.527164	-4.72314	0.837213
BOLA2B	0.0374112	-2.06721	0.0982643	0.922038	0.975006	-5.23212	1.02627
BOLA3	-0.300818	3.01552	-2.17371	0.0335395	0.198187	-3.77689	0.811792
BOLL	-0.426177	-5.87011	-1.00016	0.321105	0.615269	-4.86522	0.744232
BOP1	-0.172506	1.34592	-0.837156	0.405708	0.687641	-5.2997	0.8873
BORA	-0.143072	1.43634	-1.16244	0.249494	0.546939	-5.03069	0.905589
BPGM	-0.118358	3.81954	-1.41074	0.163301	0.443121	-5.13554	0.921235
BPHL	-0.460798	3.30878	-3.09749	0.00292676	0.060588	-1.75131	0.726584
BPI	0.175242	-1.94822	0.336232	0.737827	0.897462	-5.19595	1.12915
BPIFA1	-0.354312	-6.47163	-1.03761	0.303468	0.600692	-4.84057	0.782243
BPIFA2	-0.577404	-6.6618	-3.05817	0.00328114	0.0640535	-2.10972	0.670169
BPIFA3	-0.324486	-6.32747	-1.03701	0.303741	0.60087	-4.84034	0.798583
BPIFB1	0.34016	-4.97076	0.57718	0.5659	0.800121	-5.10377	1.2659
BPIFB2	0.273331	-2.5524	0.385439	0.701226	0.878828	-5.17854	1.20859
BPIFB3	-0.0460852	-6.62192	-0.212515	0.832399	0.941582	-5.21388	0.968561
BPIFB4	2.19962	-3.3212	2.20336	0.031279	0.191248	-3.54021	4.59359
BPIFB6	-0.191602	-6.60984	-0.918774	0.361761	0.652624	-4.92448	0.875633
BPIFC	0.171379	-4.72702	0.33307	0.740201	0.899119	-5.18464	1.12613
BPNT1	-0.285077	3.81373	-2.7084	0.00871927	0.102121	-2.74639	0.820698
BPTF	0.126843	6.40373	1.42831	0.158202	0.435184	-5.26609	1.0919
BPY2	0.0093906	-6.84186	0.077657	0.93835	0.975006	-5.22944	1.00653
BPY2B	0.0093906	-6.84186	0.077657	0.93835	0.975006	-5.22944	1.00653
BPY2C	0.0093906	-6.84186	0.077657	0.93835	0.975006	-5.22944	1.00653
BRAF	0.103884	5.43442	1.3541	0.1806	0.465395	-5.37142	1.07466
BRAP	0.0210519	4.76546	0.316241	0.752878	0.904224	-6.16332	1.0147
BRAT1	-0.0904192	5.77335	-1.14409	0.256967	0.554343	-5.62735	0.93925
BRCA1	-0.2114	2.28339	-1.10826	0.272014	0.5688	-5.21633	0.863698
BRCA2	0.269259	1.21573	1.06181	0.292423	0.58981	-5.09654	1.20519
BRCC3	-0.151729	3.89689	-2.08572	0.0411099	0.219103	-4.06651	0.900171
BRD1	0.151037	5.85035	2.38882	0.0199476	0.150613	-3.59124	1.11037
BRD2	0.0382455	8.02217	0.667277	0.507062	0.763094	-5.92926	1.02686
BRD3	-0.0221553	5.07931	-0.259346	0.796224	0.924667	-6.2053	0.98476
BRD4	0.159111	6.92672	1.781	0.0797917	0.306222	-4.71044	1.1166
BRD7	-0.0155077	5.7289	-0.300142	0.765069	0.910264	-6.21748	0.989308
BRD8	0.102596	5.83767	1.30488	0.196739	0.484845	-5.43922	1.0737
BRD9	-0.00600549	5.48376	-0.105304	0.916473	0.975006	-6.25201	0.995846
BRDT	-0.166219	-5.04531	-0.32116	0.749165	0.902787	-5.18699	0.891175
BRF1	-0.0281759	5.49218	-0.372221	0.710993	0.884138	-6.18988	0.980659
BRF2	-0.219744	2.73989	-2.08556	0.0411249	0.219103	-3.9036	0.858718
BRI3	-0.0344047	6.75317	-0.303488	0.76253	0.909192	-6.18514	0.976435
BRI3BP	-0.452729	2.78859	-2.82777	0.00629727	0.0875633	-2.3661	0.730659
BRICD5	-0.103549	2.48664	-0.566849	0.572855	0.804116	-5.66664	0.930741
BRINP1	1.64254	-2.92661	2.62333	0.0109368	0.113012	-2.8793	3.12214
BRINP2	0.121392	-1.82958	0.274102	0.784914	0.919079	-5.21232	1.08778
BRINP3	1.4518	-4.42556	2.30284	0.0246433	0.168391	-3.3944	2.73548
BRIP1	-0.157385	0.303625	-0.500245	0.618667	0.831615	-5.34408	0.896649
BRIX1	-0.163358	4.234	-1.39273	0.168656	0.449978	-5.22054	0.892944
BRK1	-0.140591	7.15536	-1.84676	0.0695369	0.286992	-4.58731	0.907148
BRMS1	-0.0788985	5.02216	-0.78871	0.433276	0.708743	-5.9316	0.94678
BRMS1L	-0.0201561	3.46233	-0.198127	0.843592	0.945813	-5.99283	0.986126
BROX	-0.0520765	5.18184	-0.634402	0.528143	0.776164	-6.04819	0.964547
BRPF1	-0.0346359	4.96416	-0.467015	0.64212	0.846723	-6.12323	0.976278
BRPF3	-0.162668	5.4293	-1.19788	0.235504	0.530637	-5.5613	0.893371
BRS3	-0.407471	-6.31908	-1.27449	0.207227	0.497788	-4.64546	0.753944
BRSK1	0.458023	0.82924	1.67615	0.0987263	0.345779	-4.35002	1.37366
BRSK2	-0.165954	0.631672	-0.600781	0.550167	0.791266	-5.34214	0.891339
BRWD1	0.085883	6.31053	1.03676	0.303858	0.60087	-5.7302	1.06134
BRWD3	0.296275	4.91691	2.28474	0.0257489	0.172161	-3.78072	1.22797
BSCL2	-0.19105	5.48978	-1.79559	0.0774139	0.302256	-4.71951	0.875968
BSDC1	-0.0532509	6.52859	-0.798152	0.427817	0.704178	-5.93223	0.963762
BSG	-0.423842	8.77094	-3.37503	0.00127532	0.0415273	-1.06524	0.745437
BSN	0.233303	1.06379	1.15539	0.252349	0.550612	-4.9879	1.17552
BSND	-0.648999	-6.16588	-1.83543	0.0712202	0.290255	-4.04024	0.637723
BSPH1	-0.332975	-6.46784	-1.38341	0.171482	0.452967	-4.54402	0.793898
BSPRY	0.781257	-0.996142	2.76904	0.00739875	0.0948824	-2.56894	1.71863
BST1	0.0922115	3.84017	0.76602	0.44656	0.71735	-5.80095	1.066
BST2	-0.0255246	6.57044	-0.135651	0.892535	0.97055	-6.23108	0.982463
BSX	-0.0585076	-6.76391	-0.347754	0.729198	0.893913	-5.1871	0.960257
BTAF1	0.310978	6.90471	2.20259	0.0313361	0.19125	-3.94298	1.24055
BTBD1	-0.114454	6.08426	-1.45132	0.151712	0.424709	-5.24465	0.923732
BTBD10	0.00374028	4.58059	0.0596509	0.952625	0.980032	-6.1906	1.0026
BTBD11	0.0970274	-0.432496	0.389597	0.698165	0.87738	-5.29374	1.06957
BTBD16	0.732966	-2.76508	1.41378	0.162409	0.441947	-4.51551	1.66205
BTBD17	0.0127749	-4.94283	0.0283641	0.977462	0.990419	-5.22427	1.00889
BTBD18	-0.351782	-3.08771	-0.89324	0.375169	0.663342	-4.94199	0.783616
BTBD19	0.301441	2.02242	1.8292	0.072161	0.292093	-4.24677	1.23237
BTBD2	-0.0473951	6.45656	-0.528921	0.598742	0.820317	-6.10903	0.967682
BTBD3	-0.0196002	4.6941	-0.187466	0.851905	0.949911	-6.18772	0.986506
BTBD6	-0.50453	6.73911	-2.80733	0.00666232	0.0904454	-2.61258	0.70489
BTBD7	-0.048618	5.27154	-0.640962	0.5239	0.772926	-6.04892	0.966862
BTBD8	0.406346	-0.759561	1.36654	0.176686	0.460133	-4.60575	1.32532
BTBD9	-0.0121747	4.01686	-0.148068	0.882768	0.96486	-6.10215	0.991597
BTC	-0.100226	0.763401	-0.378187	0.706578	0.881856	-5.45325	0.932887
BTD	-0.491295	4.62349	-3.18137	0.0022869	0.0533291	-1.64108	0.711386
BTF3	-0.0662555	8.55481	-0.729797	0.468252	0.73277	-5.84915	0.955114
BTF3L4	-0.212253	5.46378	-2.37752	0.0205156	0.152772	-3.61147	0.863188
BTG1	0.24078	8.38289	1.66729	0.100482	0.348064	-4.80355	1.18163
BTG2	0.0757777	7.57162	0.358953	0.720845	0.888374	-6.11394	1.05393
BTG3	-0.0125618	4.61885	-0.0973373	0.922771	0.975006	-6.19218	0.991331
BTG4	0.327368	-5.89515	0.924205	0.358949	0.650013	-4.91752	1.25472
BTK	0.177844	3.29112	0.773459	0.442179	0.714508	-5.6944	1.13119
BTLA	-0.138881	-1.40837	-0.312045	0.756049	0.905778	-5.22373	0.908223
BTN1A1	-0.32052	-4.53316	-0.728989	0.468743	0.733224	-5.03307	0.800781
BTN2A1	0.194161	5.69319	1.83234	0.0716859	0.291199	-4.66093	1.14406
BTN2A2	0.496534	3.76237	2.87987	0.00544884	0.0821145	-2.33353	1.41082
BTN3A1	0.343617	5.04005	1.54359	0.127758	0.389871	-5.09309	1.26893
BTN3A2	0.381375	4.98717	1.8929	0.0630233	0.272711	-4.53053	1.30258
BTN3A3	0.238464	4.51071	1.231	0.222954	0.515317	-5.45536	1.17974
BTNL2	-0.139031	-5.52391	-0.352289	0.725812	0.891847	-5.17958	0.908129
BTNL3	0.0129272	-2.72626	0.0270487	0.978507	0.990798	-5.23218	1.009
BTNL8	-0.560128	-1.17435	-1.65838	0.102272	0.350776	-4.26526	0.678242
BTNL9	-0.680645	9.10297	-2.36407	0.02121	0.15544	-3.49572	0.623886
BTRC	-0.0821166	4.34017	-0.943991	0.348825	0.640169	-5.73193	0.944671
BUB1	0.309786	-0.231991	0.836348	0.406159	0.687888	-5.09866	1.23952
BUB1B	0.203563	-0.118074	0.4441	0.65851	0.857024	-5.31236	1.15154
BUB3	0.0251935	6.03409	0.444186	0.658449	0.857014	-6.16312	1.01762
BUD13	0.0559068	4.24598	0.832207	0.408474	0.689519	-5.81428	1.03951
BUD31	-0.0932095	4.48117	-1.25724	0.213362	0.505561	-5.421	0.937435
BVES	0.370484	2.63929	2.24235	0.0285109	0.182243	-3.59795	1.29279
BX004987.1	0.0418503	-6.81588	0.297968	0.76672	0.910942	-5.1991	1.02943
BYSL	-0.492666	3.59846	-2.61711	0.0111177	0.11398	-2.9304	0.710711
BZW1	-0.283471	6.88355	-2.2903	0.0254045	0.171318	-3.76654	0.821612
BZW2	-0.345207	5.2809	-2.45821	0.0167598	0.138107	-3.43184	0.787195
C10orf105	0.0341607	-2.36707	0.0977641	0.922434	0.975006	-5.23001	1.02396
C10orf113	0.146828	-6.53783	0.517297	0.606783	0.824315	-5.13234	1.10713
C10orf120	0.151812	-6.59661	0.57737	0.565772	0.800121	-5.10881	1.11096
C10orf53	-0.261118	-6.47196	-0.992197	0.324943	0.618715	-4.87352	0.834441
C10orf55	0.337999	-1.62315	0.923223	0.359456	0.650455	-4.93456	1.264
C10orf62	-0.651405	-4.99889	-1.24284	0.218587	0.511158	-4.67143	0.63666
C10orf67	0.0978552	-6.05664	0.264051	0.792613	0.923328	-5.20127	1.07018
C10orf71	0.818028	-3.2806	1.29618	0.1997	0.487463	-4.627	1.76299
C10orf82	-0.575641	-3.9071	-1.18826	0.239244	0.535752	-4.72027	0.670988
C10orf88	-0.0699173	3.16531	-0.970973	0.33532	0.627953	-5.50888	0.952693
C10orf90	-0.269466	-0.065309	-0.724752	0.47132	0.735488	-5.18647	0.829627
C10orf95	-0.0603745	-4.80272	-0.150161	0.881123	0.963811	-5.2166	0.959015
C10orf99	0.120757	-5.55781	0.245164	0.807136	0.929666	-5.20288	1.08731
C11orf1	-0.201427	2.57613	-1.84652	0.0695731	0.287049	-4.29199	0.86969
C11orf16	0.142177	-5.13257	0.351944	0.726069	0.892004	-5.17941	1.10357
C11orf21	0.520153	1.4842	1.85072	0.0689561	0.285239	-4.15497	1.43411
C11orf24	-0.207465	5.29893	-1.60173	0.11428	0.369231	-5.02083	0.866058
C11orf40	-0.220524	-6.69987	-1.09221	0.278949	0.575733	-4.80006	0.858254
C11orf42	0.0410573	-3.52019	0.0981759	0.922108	0.975006	-5.22612	1.02887
C11orf45	0.418984	0.477293	0.992309	0.324889	0.618675	-5.06238	1.33699
C11orf49	0.0708274	3.67232	0.755734	0.452659	0.721024	-5.77865	1.05032
C11orf52	0.131884	1.59575	0.575342	0.567135	0.801014	-5.50192	1.09572
C11orf53	0.202742	-1.15437	0.339357	0.735484	0.896693	-5.23594	1.15088
C11orf54	-0.212512	4.64721	-1.85701	0.0680435	0.28287	-4.56547	0.863033
C11orf58	-0.128466	6.9376	-1.6852	0.0969587	0.342537	-4.86424	0.914804
C11orf65	0.581695	-1.15535	2.15337	0.0351717	0.202786	-3.60114	1.49661
C11orf68	-0.0446378	5.34545	-0.467555	0.641736	0.846479	-6.14565	0.969533
C11orf71	0.374236	-6.41568	1.34948	0.18207	0.466845	-4.57645	1.29615
C11orf74	-0.201221	2.85004	-2.08845	0.0408539	0.218462	-3.9131	0.869814
C11orf80	0.216165	2.3333	1.19997	0.234698	0.529981	-5.12954	1.16164
C11orf86	-1.37971	-3.57215	-2.5083	0.0147512	0.129128	-3.07088	0.384296
C11orf87	-0.207742	-4.47839	-0.365323	0.716109	0.886178	-5.17712	0.865891
C11orf88	-0.462294	-4.28571	-1.04561	0.299787	0.597029	-4.83249	0.725831
C11orf91	0.324665	-2.51101	0.774073	0.441818	0.714372	-5.01488	1.25237
C11orf94	-0.21619	-5.26888	-0.51829	0.606094	0.823913	-5.12697	0.860836
C11orf95	0.209115	5.52667	1.72194	0.0900467	0.328454	-4.84094	1.15598
C11orf96	0.184162	7.17485	0.502694	0.616954	0.830439	-6.08072	1.13616
C12orf10	0.0261542	4.84676	0.367242	0.714684	0.885373	-6.1541	1.01829
C12orf29	-0.0392548	3.44187	-0.374246	0.709493	0.883367	-5.94076	0.973157
C12orf4	-0.254512	3.95752	-2.78396	0.00710331	0.0929711	-2.58429	0.83827
C12orf40	-0.173212	-3.4937	-0.345447	0.730923	0.895151	-5.18623	0.886866
C12orf42	0.609519	-4.98717	1.25024	0.215894	0.50863	-4.66494	1.52575
C12orf43	-0.110721	3.98777	-1.26344	0.211144	0.502659	-5.3465	0.926125
C12orf45	-0.321025	2.57885	-2.50379	0.0149227	0.129793	-3.06554	0.800501
C12orf49	-0.25944	3.54081	-2.30169	0.0247125	0.16862	-3.59707	0.835412
C12orf50	-0.414245	-5.64447	-0.907897	0.367435	0.657202	-4.92754	0.750412
C12orf54	-0.107378	-2.93546	-0.260169	0.795592	0.924496	-5.20717	0.928273
C12orf56	0.623475	-5.58343	1.29703	0.19941	0.487145	-4.62315	1.54058
C12orf57	0.364374	5.05519	2.56654	0.012691	0.120834	-3.1809	1.28732
C12orf60	0.251738	0.125447	1.14011	0.258609	0.555789	-4.89579	1.19064
C12orf65	0.159131	3.64428	1.66904	0.100133	0.34748	-4.7396	1.11661
C12orf66	-0.105652	2.68142	-1.18199	0.241706	0.538192	-5.20945	0.929385
C12orf71	-0.445959	-3.22181	-1.16588	0.248111	0.545267	-4.74083	0.734096
C12orf73	-0.000367253	2.32184	-0.00366997	0.997084	0.998912	-5.78287	0.999745
C12orf74	0.0740083	-6.59775	0.303387	0.762607	0.909192	-5.19661	1.05264
C12orf75	1.20578	3.0592	3.54265	0.000757379	0.0328437	-0.560411	2.30662
C12orf76	0.115973	3.10184	1.22975	0.22342	0.51591	-5.2327	1.08371
C14orf119	-0.376717	5.07593	-3.16417	0.00240632	0.054567	-1.71119	0.770188
C14orf132	0.679505	4.24673	3.32765	0.0014739	0.043733	-1.22168	1.60159
C14orf177	-0.13985	-6.63764	-0.645013	0.52129	0.770978	-5.07908	0.907613
C14orf178	1.08082	-5.00559	2.4665	0.016411	0.136448	-3.1415	2.11523
C14orf180	-1.16015	4.99156	-3.02257	0.00363616	0.0673592	-2.07637	0.447465
C14orf28	0.0943447	3.14713	0.792288	0.431202	0.707015	-5.65282	1.06758
C14orf39	-0.513721	-0.706751	-1.46244	0.148653	0.420068	-4.50724	0.700413
C14orf93	0.128781	3.24856	1.31342	0.193861	0.481495	-5.16084	1.09337
C15orf39	-0.131537	5.43466	-0.954449	0.343549	0.635751	-5.81314	0.912858
C15orf40	-0.0319175	3.7442	-0.353415	0.724971	0.891299	-6.00507	0.978119
C15orf41	0.43757	2.7189	2.66238	0.00986191	0.108392	-2.73604	1.35432
C15orf48	0.252126	-1.69398	0.65754	0.513258	0.766307	-5.08555	1.19096
C15orf53	0.106448	-6.18317	0.284758	0.776775	0.91543	-5.19789	1.07657
C15orf59	0.415104	2.91888	2.1268	0.037408	0.20922	-3.85189	1.3334
[truncated: 16,564 more rows]

## Sheet: 60-69
gene_symbol	logFC	AveExpr	t	P.Value	adj.P.Val	B	FC
[truncated: 18,296 more rows]

[truncated: 1 more sheets: 70-79]
