# Supplementary material for: The Transcriptomic Landscape of Age-Induced Changes in Human Visceral Fat and the Predicted Omentum-Liver Connectome in Males
Source: Biomedicines. 2023 May 14;11(5):1446. doi: 10.3390/biomedicines11051446 (PMC10216224; doi:10.3390/biomedicines11051446)
Supplement: Supplementary file 1 [file biomedicines-11-01446-s001.zip › Material_S3.xlsx]

## Sheet: Sheet1
gene name	Gene Ensembl ID	Cluster	Secreted (results from The Human Protein Atlas v18)	Diferentially expressed on males for FC=2	Diferentially expressed on females for FC=2
ADAM12	ENSG00000148848	D	Y	Y	N
ADAM23	ENSG00000114948	H	Y	Y	N
ADAMTS6	ENSG00000049192	g	Y	Y	N
ADAMTSL2	ENSG00000197859	J	Y	Y	N
ADORA1	ENSG00000163485	K	N	Y	N
AEBP1	ENSG00000106624	J	Y	N	Y
AGPS	ENSG00000018510	D	Y	N	Y
AIM2	ENSG00000163568	g	N	Y	N
AK4	ENSG00000162433	K	Y	N	Y
AKNAD1	ENSG00000162641	H	N	Y	N
ALDOC	ENSG00000109107	E	N	Y	N
ALOX15	ENSG00000161905	J	N	Y	N
AMN	ENSG00000166126	D	N	Y	N
ANGPTL5	ENSG00000187151	H	Y	Y	N
ANKFN1	ENSG00000153930	K	N	Y	N
ANKRD30A	ENSG00000148513	H	N	Y	N
AOAH	ENSG00000136250	F	Y	Y	N
APOBEC3B	ENSG00000179750	J	N	Y	N
ARAP2	ENSG00000047365	J	N	N	Y
ARHGEF25	ENSG00000240771	J	N	N	Y
ARMC4	ENSG00000169126	J	N	Y	N
ATF3	ENSG00000162772	K	N	Y	N
AURKB	ENSG00000178999	g	N	Y	N
AVEN	ENSG00000169857	D	N	N	Y
BCAR3	ENSG00000137936	J	N	N	Y
BMPR1B	ENSG00000138696	J	N	Y	N
BPIFB2	ENSG00000078898	F	Y	Y	N
C12orf75	ENSG00000235162	J	N	Y	N
C1orf115	ENSG00000162817	F	N	N	Y
C1orf127	ENSG00000175262	g	Y	Y	N
C1QTNF2	ENSG00000145861	J	Y	Y	N
C1S	ENSG00000182326	J	Y	N	Y
C2	ENSG00000166278	J	Y	Y	N
C20orf141	ENSG00000258713	D	N	Y	N
C3orf80	ENSG00000180044	F	N	Y	N
C4BPB	ENSG00000123843	g	Y	Y	N
C5orf49	ENSG00000215217	K	N	Y	N
C7orf57	ENSG00000164746	K	Y	Y	N
C8orf76	ENSG00000189376	F	N	N	Y
CA3	ENSG00000164879	K	N	Y	N
CA4	ENSG00000167434	F	N	Y	N
CADM2	ENSG00000175161	F	N	Y	N
CALB2	ENSG00000172137	J	N	Y	N
CALCR	ENSG00000004948	g	Y	Y	N
CALD1	ENSG00000122786	J	N	N	Y
CAT	ENSG00000121691	F	N	N	Y
CCBE1	ENSG00000183287	J	Y	Y	N
CCDC8	ENSG00000169515	J	N	N	Y
CCL13	ENSG00000181374	g	Y	Y	N
CCL17	ENSG00000102970	J	Y	Y	N
CCL19	ENSG00000172724	H	Y	Y	N
CCL22	ENSG00000102962	F	Y	Y	N
CCL5	ENSG00000161570	H	Y	Y	N
CCR6	ENSG00000112486	F	N	Y	N
CD1C	ENSG00000158481	F	N	Y	N
CD1E	ENSG00000158488	F	Y	Y	N
CD3D	ENSG00000167286	H	Y	Y	N
CD3E	ENSG00000198851	H	N	Y	N
CD5	ENSG00000110448	H	Y	Y	N
CD69	ENSG00000110848	H	N	Y	N
CD83	ENSG00000112149	K	N	Y	N
CDH3	ENSG00000062038	J	N	Y	N
CDHR4	ENSG00000187492	J	Y	Y	N
CDKN2B	ENSG00000147883	F	N	Y	N
CDS1	ENSG00000163624	J	Y	Y	N
CEACAM1	ENSG00000079385	F	N	Y	N
CENPA	ENSG00000115163	E	N	Y	N
CENPM	ENSG00000100162	g	N	Y	N
CEP55	ENSG00000138180	g	N	Y	N
CHAC1	ENSG00000128965	K	N	Y	N
CHD3	ENSG00000170004	J	N	N	Y
CHIT1	ENSG00000133063	F	Y	Y	N
CHRNA1	ENSG00000138435	F	N	Y	N
CLASP2	ENSG00000163539	E	N	N	Y
CLDN1	ENSG00000163347	J	N	Y	N
CLDN4	ENSG00000189143	g	N	Y	N
CLEC18A	ENSG00000157322	K	Y	Y	N
CLECL1	ENSG00000184293	g	N	Y	N
CNGA3	ENSG00000144191	J	N	Y	N
COL1A1	ENSG00000108821	J	Y	Y	N
COL22A1	ENSG00000169436	J	Y	Y	N
COL7A1	ENSG00000114270	F	Y	Y	Y
COLEC11	ENSG00000118004	H	Y	Y	N
COMP	ENSG00000105664	J	Y	Y	N
COQ2	ENSG00000173085	D	N	N	Y
CPNE5	ENSG00000124772	J	N	N	Y
CPXM1	ENSG00000088882	K	Y	Y	N
CPZ	ENSG00000109625	J	Y	Y	N
CRABP2	ENSG00000143320	J	N	Y	N
CRISPLD1	ENSG00000121005	J	N	Y	N
CRTAC1	ENSG00000095713	D	Y	Y	N
CRTAM	ENSG00000109943	H	N	Y	N
CSAD	ENSG00000139631	F	Y	N	Y
CTGF	ENSG00000118523	F	Y	Y	N
CXCL13	ENSG00000156234	K	Y	Y	N
CXCL9	ENSG00000138755	H	Y	Y	N
CXCR3	ENSG00000186810	g	N	Y	N
CXCR6	ENSG00000172215	D	N	N	Y
CYP1A1	ENSG00000140465	E	N	Y	N
DBH	ENSG00000123454	J	Y	Y	N
DCSTAMP	ENSG00000164935	E	N	Y	N
DEFB132	ENSG00000186458	E	Y	Y	N
DHDH	ENSG00000104808	K	N	Y	N
DIRAS1	ENSG00000176490	K	N	Y	N
DLEU7	ENSG00000186047	g	N	Y	N
DLX3	ENSG00000064195	F	N	Y	N
DLX6	ENSG00000006377	J	N	Y	N
DNASE2B	ENSG00000137976	g	Y	Y	N
DPEP1	ENSG00000015413	J	Y	Y	N
DPEP2	ENSG00000167261	F	Y	Y	N
DPEP3	ENSG00000141096	E	Y	Y	N
DPP10	ENSG00000175497	J	N	Y	N
DPYS	ENSG00000147647	J	N	Y	N
EDEM2	ENSG00000088298	D	Y	N	Y
EFCAB7	ENSG00000203965	J	N	N	Y
ELOVL6	ENSG00000170522	K	N	Y	N
EN2	ENSG00000164778	K	N	Y	N
ENTPD2	ENSG00000054179	F	N	Y	N
EPHA5	ENSG00000145242	J	N	Y	N
EPHA7	ENSG00000135333	K	Y	Y	N
EPHB3	ENSG00000182580	J	N	Y	N
EPHX4	ENSG00000172031	H	N	Y	N
ERC2	ENSG00000187672	J	N	Y	N
ESPNL	ENSG00000144488	J	N	Y	N
ESRP2	ENSG00000103067	D	N	Y	N
ETV7	ENSG00000010030	J	N	Y	N
EYA4	ENSG00000112319	J	N	Y	N
F12	ENSG00000131187	K	Y	Y	N
F2RL2	ENSG00000164220	H	N	Y	Y
F2RL3	ENSG00000127533	J	Y	Y	N
FAM153B	ENSG00000182230	J	N	Y	N
FAM180B	ENSG00000196666	H	N	Y	N
FAM19A3	ENSG00000184599	J	Y	Y	N
FAM83G	ENSG00000188522	K	N	Y	N
FAM92B	ENSG00000153789	J	N	Y	N
FAP	ENSG00000078098	J	Y	Y	N
FFAR2	ENSG00000126262	F	N	Y	N
FFAR3	ENSG00000185897	F	N	Y	N
FGF9	ENSG00000102678	J	N	Y	N
FGFR4	ENSG00000160867	E	Y	Y	N
FLNC	ENSG00000128591	K	N	N	Y
FOXRED1	ENSG00000110074	D	N	N	Y
FRMD5	ENSG00000171877	K	N	Y	N
GABRP	ENSG00000094755	E	Y	Y	N
GALR1	ENSG00000166573	K	N	Y	N
GAPT	ENSG00000175857	F	N	Y	N
GBP5	ENSG00000154451	g	N	Y	N
GBP7	ENSG00000213512	H	N	Y	N
GDNF	ENSG00000168621	J	Y	Y	N
GJB3	ENSG00000188910	E	N	Y	N
GLI1	ENSG00000111087	K	N	Y	N
GLI2	ENSG00000074047	J	N	Y	N
GLT8D2	ENSG00000120820	J	N	Y	N
GNAO1	ENSG00000087258	K	N	N	Y
GNG2	ENSG00000186469	F	N	N	Y
GPR12	ENSG00000132975	H	N	Y	N
GPR42	ENSG00000126251	F	N	Y	N
GPRIN2	ENSG00000204175	J	N	Y	N
GRM7	ENSG00000196277	J	N	Y	N
GZMK	ENSG00000113088	H	Y	Y	N
HAVCR1	ENSG00000113249	D	Y	N	Y
HES5	ENSG00000197921	H	N	Y	N
HGFAC	ENSG00000109758	K	Y	N	Y
HLA-DQB2	ENSG00000232629	H	Y	Y	N
HORMAD1	ENSG00000143452	E	N	Y	N
HTR7	ENSG00000148680	g	N	Y	N
HTRA4	ENSG00000169495	J	Y	Y	N
HUNK	ENSG00000142149	J	N	Y	N
ICOS	ENSG00000163600	F	N	Y	N
IER3	ENSG00000137331	K	N	Y	N
IFIT1B	ENSG00000204010	E	N	Y	N
IFNLR1	ENSG00000185436	J	Y	Y	N
IGFN1	ENSG00000163395	K	N	Y	N
IGLL5	ENSG00000254709	J	N	Y	N
IGSF9	ENSG00000085552	J	Y	Y	N
IL12A	ENSG00000168811	J	N	Y	N
IL34	ENSG00000157368	J	Y	Y	N
IL4I1	ENSG00000104951	K	Y	Y	N
ITGAL	ENSG00000005844	g	Y	Y	N
ITGB8	ENSG00000105855	J	N	Y	N
JUN	ENSG00000177606	H	N	Y	N
KCNB2	ENSG00000182674	J	N	Y	N
KCNF1	ENSG00000162975	g	N	Y	N
KCNN4	ENSG00000104783	K	Y	Y	N
KIF20A	ENSG00000112984	g	N	Y	N
KIF21B	ENSG00000116852	H	N	N	Y
KLHL31	ENSG00000124743	F	N	Y	N
KLKB1	ENSG00000164344	H	Y	N	Y
KMO	ENSG00000117009	g	N	Y	N
KRT222	ENSG00000213424	H	N	Y	N
KRT24	ENSG00000167916	H	N	Y	N
LDHAL6B	ENSG00000171989	J	N	N	Y
LMO3	ENSG00000048540	H	N	Y	N
LMO7	ENSG00000136153	J	N	Y	N
LRP5	ENSG00000162337	F	N	N	Y
LRRC15	ENSG00000172061	J	N	Y	N
LSAMP	ENSG00000185565	J	N	Y	N
LY6H	ENSG00000176956	J	Y	Y	N
MACC1	ENSG00000183742	g	N	Y	N
MARCH2	ENSG00000099785	F	N	N	Y
MAST2	ENSG00000086015	J	N	N	Y
MATN1	ENSG00000162510	K	Y	Y	N
MCF2	ENSG00000101977	g	N	Y	N
MDFI	ENSG00000112559	F	N	Y	N
MESP1	ENSG00000166823	F	N	Y	N
MEST	ENSG00000106484	D	Y	Y	Y
MFAP4	ENSG00000166482	J	Y	Y	N
MIA	ENSG00000261857	K	Y	N	Y
MICAL1	ENSG00000135596	F	N	N	Y
MMP11	ENSG00000099953	J	Y	Y	N
MMP7	ENSG00000137673	g	Y	Y	N
MS4A4E	ENSG00000214787	g	N	Y	N
MSI1	ENSG00000135097	J	N	Y	N
MUM1L1	ENSG00000157502	K	N	Y	N
MUSTN1	ENSG00000272573	K	N	Y	N
MYEOV	ENSG00000172927	g	N	Y	N
NALCN	ENSG00000102452	J	N	Y	N
NAP1L2	ENSG00000186462	K	N	Y	N
NEDD4L	ENSG00000049759	K	N	Y	N
NEK2	ENSG00000117650	g	N	Y	N
NKAIN1	ENSG00000084628	K	N	Y	N
NKD2	ENSG00000145506	K	N	Y	N
NPC1L1	ENSG00000015520	K	N	Y	N
NPR3	ENSG00000113389	H	N	Y	N
NR0B1	ENSG00000169297	K	N	Y	N
NTNG1	ENSG00000162631	J	Y	Y	N
OGN	ENSG00000106809	J	Y	Y	N
OLFM2	ENSG00000105088	K	Y	Y	N
OLR1	ENSG00000173391	K	N	Y	N
OMG	ENSG00000126861	H	Y	Y	N
OPCML	ENSG00000183715	K	Y	Y	N
OR2I1P	ENSG00000237988	F	N	Y	N
OTOA	ENSG00000155719	g	Y	Y	N
P2RX6	ENSG00000099957	H	N	Y	N
P2RX7	ENSG00000089041	J	N	Y	N
PAQR5	ENSG00000137819	J	N	Y	N
PARVG	ENSG00000138964	g	N	Y	N
PATL2	ENSG00000229474	g	Y	N	Y
PBK	ENSG00000168078	K	N	Y	N
PCDHA13	ENSG00000239389	D	N	Y	N
PCP4	ENSG00000183036	K	N	Y	N
PDE6G	ENSG00000185527	g	N	Y	N
PHC1	ENSG00000111752	J	N	N	Y
PHF21A	ENSG00000135365	J	N	N	Y
PKP2	ENSG00000057294	K	N	Y	Y
PLA1A	ENSG00000144837	F	Y	Y	N
PLA2G15	ENSG00000103066	g	Y	N	Y
PLA2G7	ENSG00000146070	g	Y	Y	N
PLOD2	ENSG00000152952	K	Y	Y	N
PMAIP1	ENSG00000141682	J	N	Y	N
PNLIPRP3	ENSG00000203837	E	Y	Y	N
PODNL1	ENSG00000132000	g	Y	Y	N
PON1	ENSG00000005421	J	Y	Y	N
POPDC3	ENSG00000132429	g	N	Y	N
PPP4R4	ENSG00000119698	J	N	Y	N
PRAME	ENSG00000185686	g	N	Y	N
PRKG2	ENSG00000138669	J	N	Y	Y
PTCH2	ENSG00000117425	D	N	Y	N
PTCHD3	ENSG00000182077	H	N	Y	N
PTGER3	ENSG00000050628	F	N	Y	N
PTGFR	ENSG00000122420	J	N	Y	Y
RASGRF1	ENSG00000058335	D	N	Y	N
RASL11B	ENSG00000128045	g	N	Y	N
RASSF8	ENSG00000123094	J	N	N	Y
RBM46	ENSG00000151962	D	N	N	Y
RDH12	ENSG00000139988	E	Y	Y	N
RERGL	ENSG00000111404	F	N	Y	N
RFX8	ENSG00000196460	J	N	Y	N
ROR2	ENSG00000169071	J	N	Y	N
RORC	ENSG00000143365	J	N	Y	N
SAMD11	ENSG00000187634	J	Y	Y	N
SCARA3	ENSG00000168077	J	N	Y	N
SCG2	ENSG00000171951	J	Y	Y	N
SCN4A	ENSG00000007314	F	N	Y	N
SDR16C5	ENSG00000170786	F	N	Y	N
SH2D1A	ENSG00000183918	H	N	Y	N
SKA1	ENSG00000154839	g	N	Y	N
SLAMF6	ENSG00000162739	g	N	Y	N
SLAMF9	ENSG00000162723	J	N	Y	N
SLC15A5	ENSG00000188991	F	N	Y	N
SLC22A15	ENSG00000163393	J	N	N	Y
SLC25A48	ENSG00000145832	E	N	Y	N
SLC28A3	ENSG00000197506	J	N	Y	N
SLC44A5	ENSG00000137968	J	N	Y	N
SLC4A4	ENSG00000080493	J	N	Y	N
SLC52A1	ENSG00000132517	H	N	Y	N
SLC6A12	ENSG00000111181	g	N	Y	N
SLC6A7	ENSG00000011083	K	N	Y	N
SLFN14	ENSG00000236320	H	N	Y	N
SMKR1	ENSG00000240204	J	N	Y	N
SMPDL3B	ENSG00000130768	J	Y	Y	N
SOAT2	ENSG00000167780	H	N	Y	N
SORCS2	ENSG00000184985	J	N	Y	N
SOWAHD	ENSG00000187808	g	N	Y	N
SPIB	ENSG00000269404	H	N	Y	N
SPNS3	ENSG00000182557	J	N	Y	N
SPP1	ENSG00000118785	H	Y	Y	N
SPSB4	ENSG00000175093	D	N	Y	N
ST14	ENSG00000149418	g	N	Y	N
STMN2	ENSG00000104435	g	N	Y	N
SUSD4	ENSG00000143502	K	N	Y	N
TACSTD2	ENSG00000184292	E	N	Y	N
TBC1D10C	ENSG00000175463	g	N	Y	N
TBX4	ENSG00000121075	K	N	Y	N
TCEAL2	ENSG00000184905	J	N	Y	N
TEX12	ENSG00000150783	E	N	Y	N
TGM5	ENSG00000104055	H	N	Y	N
THBS3	ENSG00000169231	J	Y	N	Y
TIGIT	ENSG00000181847	H	N	Y	N
TM4SF19	ENSG00000145107	H	N	Y	N
TMEM255A	ENSG00000125355	J	N	Y	N
TMEM52B	ENSG00000165685	J	Y	Y	N
TMPRSS13	ENSG00000137747	g	N	Y	N
TMSB15A	ENSG00000158164	J	N	Y	N
TNFRSF17	ENSG00000048462	g	N	Y	N
TNFSF15	ENSG00000181634	J	Y	Y	N
TNFSF18	ENSG00000120337	F	N	Y	N
TNFSF9	ENSG00000125657	K	N	Y	N
TNN	ENSG00000120332	F	Y	Y	N
TPPP3	ENSG00000159713	H	N	Y	N
TREML1	ENSG00000161911	E	N	Y	N
TRIM50	ENSG00000146755	g	N	Y	N
TRPA1	ENSG00000104321	J	N	Y	N
TRPC4	ENSG00000133107	J	N	N	Y
TSPAN11	ENSG00000110900	H	N	Y	N
TSPAN14	ENSG00000108219	F	N	N	Y
TTC7B	ENSG00000165914	F	N	N	Y
TYROBP	ENSG00000011600	g	N	Y	N
UBD	ENSG00000213886	g	N	Y	N
ULBP1	ENSG00000111981	K	N	Y	N
URAD	ENSG00000183463	H	N	Y	N
VASH2	ENSG00000143494	J	N	Y	N
VAT1L	ENSG00000171724	J	N	Y	N
VCAM1	ENSG00000162692	g	N	Y	N
VNN1	ENSG00000112299	g	Y	Y	N
WISP1	ENSG00000104415	K	Y	Y	N
WISP2	ENSG00000064205	H	Y	Y	N
WNT1	ENSG00000125084	H	Y	Y	N
WNT10A	ENSG00000135925	J	N	Y	N
WNT10B	ENSG00000169884	H	Y	Y	N
WNT3	ENSG00000108379	K	Y	Y	N
WSCD2	ENSG00000075035	H	Y	Y	N
XCL1	ENSG00000143184	H	Y	Y	N
ZC3H12B	ENSG00000102053	J	N	N	Y
ZFR2	ENSG00000105278	J	N	Y	N
ZNF250	ENSG00000196150	J	N	N	Y
ZNF365	ENSG00000138311	D	N	Y	N
ZNF385B	ENSG00000144331	H	N	Y	N
ZNF469	ENSG00000225614	K	N	Y	N
ABCA10	ENSG00000154263	I	N	Y	N
ABCB5	ENSG00000004846	I	N	Y	N
ACY3	ENSG00000132744	I	N	Y	N
ADAM33	ENSG00000149451	I	Y	Y	N
ADAMTS16	ENSG00000145536	I	Y	Y	N
ALPK3	ENSG00000136383	A	N	Y	N
ANKRD10	ENSG00000088448	I	N	N	Y
ANKRD20A8P	ENSG00000229089	A	N	Y	N
ANKRD53	ENSG00000144031	A	N	Y	N
APCDD1	ENSG00000154856	C	Y	Y	N
APOBEC3H	ENSG00000100298	I	N	Y	N
ART5	ENSG00000167311	I	Y	Y	N
ASCC2	ENSG00000100325	A	N	N	Y
ATMIN	ENSG00000166454	B	Y	N	Y
BEND4	ENSG00000188848	I	N	Y	N
BEND6	ENSG00000151917	I	N	Y	N
BIRC7	ENSG00000101197	I	N	Y	N
BOK	ENSG00000176720	C	N	Y	N
BTBD16	ENSG00000138152	I	N	Y	N
C11orf45	ENSG00000174370	I	Y	Y	N
C12orf60	ENSG00000182993	I	N	N	Y
C16orf89	ENSG00000153446	I	Y	Y	N
C19orf71	ENSG00000183397	C	N	Y	N
C1QTNF1	ENSG00000173918	A	Y	Y	N
C20orf203	ENSG00000198547	I	N	Y	N
C4orf19	ENSG00000154274	C	N	Y	N
C9orf50	ENSG00000179058	I	N	Y	N
C9orf66	ENSG00000183784	C	N	N	Y
CCDC110	ENSG00000168491	I	N	N	Y
CD248	ENSG00000174807	B	N	N	Y
CD300LB	ENSG00000178789	A	Y	Y	N
CDH20	ENSG00000101542	C	N	Y	N
CDR1	ENSG00000184258	A	N	Y	N
CDX1	ENSG00000113722	I	N	Y	N
CHIC1	ENSG00000204116	I	N	N	Y
CLEC4F	ENSG00000152672	I	N	Y	N
CLMP	ENSG00000166250	A	N	Y	N
CNTFR	ENSG00000122756	C	Y	Y	N
COX10	ENSG00000006695	B	N	N	Y
CPAMD8	ENSG00000160111	C	Y	Y	N
CPNE4	ENSG00000196353	C	N	Y	N
CXorf65	ENSG00000204165	C	N	Y	N
DEFB124	ENSG00000180383	I	Y	Y	N
ECEL1	ENSG00000171551	A	N	Y	N
ECHDC3	ENSG00000134463	B	N	Y	N
EDA2R	ENSG00000131080	I	N	Y	N
EPB41L4B	ENSG00000095203	C	N	Y	N
EXOC3L4	ENSG00000205436	I	N	Y	N
FAM177B	ENSG00000197520	I	N	Y	N
FAM72C	ENSG00000203817	C	N	Y	N
FAM72D	ENSG00000215784	C	N	Y	N
FAM83F	ENSG00000133477	C	N	Y	N
FAM89A	ENSG00000182118	C	N	Y	N
FAM98A	ENSG00000119812	B	N	N	Y
FCN2	ENSG00000160339	B	Y	Y	N
FCN3	ENSG00000142748	C	Y	Y	N
FCRL6	ENSG00000181036	I	N	Y	N
FGF14	ENSG00000102466	I	N	Y	N
FGF16	ENSG00000196468	I	N	Y	N
FIBCD1	ENSG00000130720	A	N	Y	N
FKBP7	ENSG00000079150	I	Y	N	Y
FNDC4	ENSG00000115226	A	N	Y	N
GCDH	ENSG00000105607	B	N	N	Y
GCHFR	ENSG00000137880	B	N	N	Y
GDF10	ENSG00000107623	C	Y	Y	N
GGT1	ENSG00000100031	I	Y	N	Y
GLIS1	ENSG00000174332	B	N	Y	N
GPR1	ENSG00000183671	I	N	Y	N
GREB1L	ENSG00000141449	C	N	Y	N
GZMM	ENSG00000197540	I	Y	Y	N
HAO2	ENSG00000116882	I	N	Y	N
HAPLN3	ENSG00000140511	C	Y	N	Y
HKDC1	ENSG00000156510	I	N	Y	N
HSPB7	ENSG00000173641	C	N	Y	N
IGFBP6	ENSG00000167779	I	Y	Y	N
IGLON5	ENSG00000142549	C	Y	Y	N
JAKMIP2	ENSG00000176049	C	N	Y	N
KCNA6	ENSG00000151079	I	N	Y	N
KCNJ5	ENSG00000120457	I	N	Y	N
KHDRBS2	ENSG00000112232	I	N	Y	N
KIAA1755	ENSG00000149633	I	N	Y	N
KRT79	ENSG00000185640	B	N	Y	N
LIPC	ENSG00000166035	I	Y	Y	N
LOXL1	ENSG00000129038	I	Y	Y	N
MAP3K12	ENSG00000139625	I	N	N	Y
MCM10	ENSG00000065328	C	N	Y	N
MGAT3	ENSG00000128268	B	Y	Y	N
MLX	ENSG00000108788	B	N	N	Y
MS4A14	ENSG00000166928	I	Y	Y	N
NANOS1	ENSG00000188613	C	N	Y	N
NAP1L4	ENSG00000205531	B	N	N	Y
NDRG4	ENSG00000103034	B	N	Y	N
NDUFV3	ENSG00000160194	B	N	N	Y
NNAT	ENSG00000053438	C	N	Y	N
NUGGC	ENSG00000189233	I	N	Y	Y
OLFML1	ENSG00000183801	I	Y	Y	N
PAPLN	ENSG00000100767	I	Y	Y	N
PCDH10	ENSG00000138650	A	N	Y	N
PDE1C	ENSG00000154678	I	N	Y	N
PI16	ENSG00000164530	I	N	Y	N
PITX3	ENSG00000107859	C	N	Y	N
PLEKHG6	ENSG00000008323	C	N	Y	N
PLN	ENSG00000198523	A	N	N	Y
PLXNC1	ENSG00000136040	I	N	Y	N
PRG2	ENSG00000186652	A	Y	Y	N
PRRG3	ENSG00000130032	I	N	Y	N
PRRT2	ENSG00000167371	I	N	Y	N
PRRT4	ENSG00000224940	B	Y	Y	N
PSORS1C1	ENSG00000204540	I	N	Y	N
PTCHD4	ENSG00000244694	I	N	Y	N
PYHIN1	ENSG00000163564	I	N	Y	N
RASL10B	ENSG00000141150	A	N	Y	N
RBP5	ENSG00000139194	I	N	Y	N
RNF157	ENSG00000141576	A	N	Y	N
ROBO2	ENSG00000185008	I	N	Y	N
RORB	ENSG00000198963	B	N	Y	N
RP1	ENSG00000104237	C	N	Y	N
RRAD	ENSG00000166592	C	N	Y	N
SARDH	ENSG00000123453	I	N	Y	N
SCML4	ENSG00000146285	I	N	Y	N
SCO1	ENSG00000133028	B	N	N	Y
SEL1L2	ENSG00000101251	A	N	Y	N
SEMA5B	ENSG00000082684	I	N	Y	N
SETBP1	ENSG00000152217	I	N	N	Y
SFI1	ENSG00000198089	I	N	N	Y
SLC16A10	ENSG00000112394	A	N	Y	N
SLC29A4	ENSG00000164638	C	N	Y	N
SLC35C1	ENSG00000181830	B	N	Y	N
SMIM3	ENSG00000256235	A	N	Y	N
SPTSSB	ENSG00000196542	I	N	Y	N
SRCIN1	ENSG00000017373	A	N	Y	N
SULT4A1	ENSG00000130540	A	N	Y	N
SYCP1	ENSG00000198765	C	N	Y	N
SYN2	ENSG00000157152	C	N	Y	N
TCF21	ENSG00000118526	I	N	Y	N
TENM3	ENSG00000218336	A	N	Y	N
TM4SF20	ENSG00000168955	A	N	Y	N
TMEM239	ENSG00000198326	A	N	Y	N
TMEM52	ENSG00000178821	A	Y	Y	N
TRIM55	ENSG00000147573	A	N	Y	N
TTC36	ENSG00000172425	A	N	Y	N
TTC39A	ENSG00000085831	A	N	Y	N
TYRO3	ENSG00000092445	B	N	Y	N
VEPH1	ENSG00000197415	A	N	Y	N
WDR91	ENSG00000105875	I	N	N	Y
XKRX	ENSG00000182489	I	N	Y	N
ZFP37	ENSG00000136866	I	N	N	Y
ZMYND15	ENSG00000141497	I	N	Y	N
FASN	ENSG00000169710	A	N	Y	N
DGAT2	ENSG00000062282	B	N	Y	N
ACLY	ENSG00000131473	A	N	Y	N
ACSL1	ENSG00000151726	A	N	Y	N
GPAM	ENSG00000119927	C	N	Y	N
AGPAT2	ENSG00000169692	C	N	Y	N
PNPLA3	ENSG00000100344	B	N	Y	N
ACSS2	ENSG00000131069	B	N	Y	N
ABHD5	ENSG00000011198	C	N	Y	N
SLC27A2	ENSG00000140284	A	N	Y	N
HADHB	ENSG00000138029	B	Y	N	Y
PGD	ENSG00000142657	B	N	Y	N
IDH3G	ENSG00000067829	B	N	N	Y
SUCLG2	ENSG00000172340	B	N	N	Y
BDH1	ENSG00000161267	A	N	N	Y
ADH4	ENSG00000198099	B	N	Y	N
HSD17B10	ENSG00000072506	B	N	N	Y
CYB5A	ENSG00000166347	B	N	Y	N
GGT5	ENSG00000099998	B	Y	N	Y
NAT8L	ENSG00000185818	C	N	Y	N
AKR1C2	ENSG00000151632	C	N	Y	N
GGCT	ENSG00000006625	A	N	Y	N
NAA50	ENSG00000121579	A	N	N	Y
PLIN1	ENSG00000166819	C	N	Y	N
ADIPOQ	ENSG00000181092	C	Y	Y	N
GPD1	ENSG00000167588	C	N	Y	N
GHR	ENSG00000112964	B	N	Y	N
G0S2	ENSG00000123689	B	N	Y	N
RETSAT	ENSG00000042445	C	Y	Y	N
SCD	ENSG00000099194	A	N	Y	N
PRKAR2B	ENSG00000005249	C	N	Y	N
CEBPA	ENSG00000245848	B	N	Y	Y
MARC1	ENSG00000186205	C	N	Y	N
CIDEC	ENSG00000187288	C	N	Y	N
CIDEA	ENSG00000176194	C	N	Y	Y
LEP	ENSG00000174697	F	Y	Y	N
ACACB	ENSG00000076555	C	Y	Y	N
LIPE	ENSG00000079435	C	N	Y	N
GYG2	ENSG00000056998	C	N	Y	N
KLB	ENSG00000134962	C	N	Y	N
LGALS12	ENSG00000133317	B	N	Y	N
AIFM2	ENSG00000042286	B	N	Y	N
ACO1	ENSG00000122729	B	N	Y	N
PDE3B	ENSG00000152270	C	N	Y	N
LPL	ENSG00000175445	C	Y	Y	N
SLC19A3	ENSG00000135917	C	N	Y	N
AOC3	ENSG00000131471	C	Y	N	Y
PCK1	ENSG00000124253	B	N	Y	N
ACVR1C	ENSG00000123612	C	Y	Y	N
MGST1	ENSG00000008394	C	N	Y	N
MRAP	ENSG00000170262	B	N	Y	N
SLC7A10	ENSG00000130876	B	N	Y	Y
ABCD2	ENSG00000173208	B	N	Y	Y
RBP4	ENSG00000138207	B	Y	Y	N
IGF1	ENSG00000017427	A	Y	Y	N
ANGPTL4	ENSG00000167772	A	Y	Y	N
AZGP1	ENSG00000160862	C	Y	Y	N
PGM1	ENSG00000079739	B	N	Y	N
ALDH2	ENSG00000111275	C	N	Y	N
TMEM132C	ENSG00000181234	C	N	Y	N
TF	ENSG00000091513	A	Y	Y	N
PEX11A	ENSG00000166821	B	N	Y	N
PC	ENSG00000173599	C	N	Y	Y
DUSP4	ENSG00000120875	A	N	Y	N
PTPN3	ENSG00000070159	A	N	Y	N
HEBP2	ENSG00000051620	C	N	Y	N
ORMDL3	ENSG00000172057	B	N	Y	N
ECH1	ENSG00000104823	C	N	N	Y
CTSK	ENSG00000143387	I	Y	Y	Y
PTPRF	ENSG00000142949	B	Y	Y	N
ACACA	ENSG00000132142	A	N	Y	N
ISOC1	ENSG00000066583	C	N	N	Y
VEGFA	ENSG00000112715	A	Y	Y	N
MPC1	ENSG00000060762	B	N	N	Y
FOSB	ENSG00000125740	C	N	Y	N
PSAT1	ENSG00000135069	A	N	Y	N
ADRA1A	ENSG00000120907	C	N	Y	N
PLXNA4	ENSG00000221866	B	Y	Y	N
NTSR2	ENSG00000169006	A	N	Y	N
IFNG	ENSG00000111537	I	Y	Y	N
AFF2	ENSG00000155966	C	N	Y	N
FOS	ENSG00000170345	C	N	Y	N
GPT	ENSG00000167701	B	N	N	Y
LPIN1	ENSG00000134324	A	N	Y	N
SLC39A14	ENSG00000104635	A	Y	Y	N
SLC16A7	ENSG00000118596	A	N	Y	N
HCAR3	ENSG00000255398	C	N	Y	N
FOLH1	ENSG00000086205	I	N	Y	N
MT1X	ENSG00000187193	A	N	Y	N
EGR1	ENSG00000120738	C	N	Y	N
FOXL1	ENSG00000176678	A	N	Y	N
NRCAM	ENSG00000091129	A	Y	Y	N
F5	ENSG00000198734	A	Y	Y	N
SHMT1	ENSG00000176974	B	N	Y	N
DCN	ENSG00000011465	I	Y	N	Y
COPB2	ENSG00000184432	B	N	N	Y
HAMP	ENSG00000105697	A	Y	Y	N
ALK	ENSG00000171094	B	N	Y	N
PARVA	ENSG00000197702	A	N	N	Y
TM7SF2	ENSG00000149809	C	N	Y	N
HK2	ENSG00000159399	A	N	Y	N
DHCR7	ENSG00000172893	A	N	Y	N
NSDHL	ENSG00000147383	B	N	Y	N
PPIF	ENSG00000108179	A	N	Y	N
SLC1A3	ENSG00000079215	A	N	Y	N
GLUL	ENSG00000135821	A	N	Y	N
FABP5	ENSG00000164687	B	N	N	Y
AACS	ENSG00000081760	A	N	Y	N
MAPT	ENSG00000186868	C	N	Y	N
ASPN	ENSG00000106819	I	Y	Y	N
ADIPOR2	ENSG00000006831	A	N	Y	N
CD8A	ENSG00000153563	I	Y	Y	N
IP6K3	ENSG00000161896	A	N	Y	N
ALDH1L1	ENSG00000144908	C	N	Y	N
PARP1	ENSG00000143799	B	N	N	Y
CCR3	ENSG00000183625	I	N	Y	N
POU2AF1	ENSG00000110777	I	N	Y	N
ACOT4	ENSG00000177465	B	N	N	Y
PEMT	ENSG00000133027	C	N	Y	N
PPP1R1A	ENSG00000135447	C	N	Y	N
SAR1B	ENSG00000152700	C	N	N	Y
HEPACAM	ENSG00000165478	C	N	Y	N
GPR37	ENSG00000170775	A	N	Y	N
TRHDE	ENSG00000072657	C	N	Y	N
APMAP	ENSG00000101474	B	N	N	Y
CXCR4	ENSG00000121966	I	N	Y	N
CYP3A5	ENSG00000106258	A	N	Y	N
TKT	ENSG00000163931	B	Y	Y	N
KIAA1549L	ENSG00000110427	A	N	Y	N
EGR2	ENSG00000122877	B	N	Y	N
FRZB	ENSG00000162998	I	Y	Y	Y
HLA-DMB	ENSG00000242574	I	N	Y	N
ACP5	ENSG00000102575	I	Y	Y	N
IL1RN	ENSG00000136689	A	Y	Y	N
CYP1A2	ENSG00000140505	A	N	Y	N
GDF15	ENSG00000130513	I	Y	Y	N
SLC2A4	ENSG00000181856	C	N	Y	N
LAMB3	ENSG00000196878	A	Y	Y	N
DMRTA1	ENSG00000176399	B	N	Y	N
MMP15	ENSG00000102996	B	N	N	Y
ADRB3	ENSG00000188778	A	N	Y	N
CCL4	ENSG00000129277	B	Y	Y	N
WLS	ENSG00000116729	B	N	N	Y
ADCY2	ENSG00000078295	A	N	Y	N
MATK	ENSG00000007264	I	N	Y	N
USP10	ENSG00000103194	A	N	N	Y
MOCOS	ENSG00000075643	A	N	Y	N
PDE8B	ENSG00000113231	A	N	Y	N
CISH	ENSG00000114737	A	N	Y	N
SH3KBP1	ENSG00000147010	C	N	N	Y
RTN4	ENSG00000115310	C	N	N	Y
TXNDC9	ENSG00000115514	C	N	N	Y
MOGAT2	ENSG00000166391	A	N	Y	N
CDKN2A	ENSG00000147889	I	Y	Y	N
LUM	ENSG00000139329	I	Y	Y	N
HTR2B	ENSG00000135914	I	N	Y	N
JUNB	ENSG00000171223	A	N	Y	N
ITGAX	ENSG00000140678	A	Y	Y	N
ATF5	ENSG00000169136	A	N	Y	N
GPT2	ENSG00000166123	C	N	Y	N
SCGN	ENSG00000079689	C	N	Y	N
CD40LG	ENSG00000102245	I	N	Y	N
TREH	ENSG00000118094	A	Y	Y	N
RGS1	ENSG00000090104	I	N	Y	N
CLDN2	ENSG00000165376	B	N	Y	N
CCL3	ENSG00000006075	A	Y	Y	N
CXCL10	ENSG00000169245	I	Y	Y	N
SLAMF7	ENSG00000026751	I	Y	Y	N
PMEL	ENSG00000185664	I	Y	Y	N
BLNK	ENSG00000095585	I	N	Y	N
PRR18	ENSG00000176381	B	N	Y	N
CD70	ENSG00000125726	I	N	Y	N
PAX8	ENSG00000125618	A	N	Y	N
FASLG	ENSG00000117560	I	N	Y	N
MC5R	ENSG00000176136	B	N	Y	N
PCYT1A	ENSG00000161217	C	N	N	Y
EIF5	ENSG00000100664	A	N	N	Y
SLC25A18	ENSG00000182902	C	N	Y	N
GPR26	ENSG00000154478	I	N	Y	N
ULBP3	ENSG00000131019	A	Y	Y	N
TNFRSF9	ENSG00000049249	C	N	Y	N
EIF4G2	ENSG00000110321	A	N	N	Y
MOGAT1	ENSG00000124003	B	N	Y	N
LY9	ENSG00000122224	I	N	Y	N
MZB1	ENSG00000170476	I	Y	Y	N
SPON1	ENSG00000152268	A	Y	Y	N
TAGAP	ENSG00000164691	I	N	Y	N
GLRB	ENSG00000109738	B	Y	Y	N
UBA3	ENSG00000144744	C	N	N	Y
DUSP2	ENSG00000158050	A	N	Y	N
KCNB1	ENSG00000158445	A	N	Y	N
EIF4EBP1	ENSG00000187840	A	N	Y	N
FADS1	ENSG00000149485	A	N	Y	N
RAC3	ENSG00000169750	B	N	Y	N
SLC6A8	ENSG00000130821	A	N	Y	N
MS4A1	ENSG00000156738	I	N	Y	N
GPR15	ENSG00000154165	I	N	Y	N
GLDN	ENSG00000186417	B	N	Y	N
CHCHD10	ENSG00000250479	B	N	Y	N
FCER2	ENSG00000104921	I	N	Y	N
SLC30A5	ENSG00000145740	C	N	N	Y
PSMD3	ENSG00000108344	A	N	N	Y
RTN4RL1	ENSG00000185924	B	Y	Y	N
PSMB6	ENSG00000142507	B	N	N	Y
PPP1R1B	ENSG00000131771	C	N	Y	N
SFRP2	ENSG00000145423	I	Y	Y	N
ARFGAP2	ENSG00000149182	B	N	N	Y
EPO	ENSG00000130427	I	Y	Y	N
TRAT1	ENSG00000163519	I	N	Y	N
ASIP	ENSG00000101440	C	Y	Y	N
TUBB3	ENSG00000258947	A	N	Y	N
FFAR4	ENSG00000186188	B	N	Y	N
THEMIS	ENSG00000172673	I	N	Y	N
TREM2	ENSG00000095970	I	Y	Y	N
MYH11	ENSG00000133392	A	N	N	Y
P2RY10	ENSG00000078589	I	N	Y	N
GDF6	ENSG00000156466	I	Y	Y	N
PLA2G2D	ENSG00000117215	I	Y	Y	N
CD52	ENSG00000169442	I	N	Y	N
CXCL11	ENSG00000169248	I	Y	Y	N
SLC29A2	ENSG00000174669	B	N	Y	N
KCNJ1	ENSG00000151704	C	N	Y	N
GZMH	ENSG00000100450	I	Y	Y	N
NTS	ENSG00000133636	A	Y	Y	N
USO1	ENSG00000138768	C	N	N	Y
MUSK	ENSG00000030304	A	N	N	Y
ULBP2	ENSG00000131015	A	N	Y	N
TMEM119	ENSG00000183160	I	Y	Y	N
EOMES	ENSG00000163508	I	N	Y	N
WNT16	ENSG00000002745	I	Y	Y	N
FBXO27	ENSG00000161243	C	N	Y	N
PLD4	ENSG00000166428	I	N	Y	N
WNT6	ENSG00000115596	I	Y	Y	N
MT1M	ENSG00000205364	A	N	Y	N
RTP4	ENSG00000136514	I	N	Y	N
MCOLN2	ENSG00000153898	I	N	Y	N
FGFRL1	ENSG00000127418	A	Y	Y	N
CSPG5	ENSG00000114646	B	N	Y	N
MRPS11	ENSG00000181991	B	N	N	Y
MYH14	ENSG00000105357	C	N	Y	N
KLF14	ENSG00000174595	B	N	Y	N
CMTM5	ENSG00000166091	C	N	Y	N
FBXW5	ENSG00000159069	B	N	N	Y
C11orf86	ENSG00000173237	B	N	Y	N
TPD52L2	ENSG00000101150	A	N	N	Y
FOXS1	ENSG00000179772	I	N	Y	N
MT1B	ENSG00000169688	A	N	Y	N
HCAR2	ENSG00000182782	C	N	Y	Y
GIPR	ENSG00000010310	I	N	Y	N
LGI3	ENSG00000168481	C	Y	Y	N
NCR1	ENSG00000189430	I	N	Y	N
NACC1	ENSG00000160877	A	N	N	Y
SCIN	ENSG00000006747	I	N	Y	N
HLA-DQA2	ENSG00000237541	I	N	Y	N
MT1A	ENSG00000205362	A	N	Y	N
STOX1	ENSG00000165730	B	Y	Y	N
UCN2	ENSG00000145040	C	Y	Y	N
NPAS4	ENSG00000174576	C	N	Y	N
CTHRC1	ENSG00000164932	I	Y	Y	N
HAUS7	ENSG00000213397	A	N	N	Y
ADAMTS4	ENSG00000158859	A	N	Y	N
TRAPPC1	ENSG00000170043	B	N	N	Y
TNFRSF13C	ENSG00000159958	I	N	Y	N
TRMT10A	ENSG00000145331	C	N	N	Y
GRAMD4	ENSG00000075240	C	N	N	Y
VANGL2	ENSG00000162738	I	N	N	Y
WNT9B	ENSG00000158955	C	Y	Y	N
FITM2	ENSG00000197296	B	N	Y	N
CES4A	ENSG00000172824	A	Y	Y	N
TMEM126A	ENSG00000171202	C	N	N	Y
SLC36A2	ENSG00000186335	A	N	Y	N
C2CD4B	ENSG00000205502	B	N	Y	N
TUBA3D	ENSG00000075886	B	N	Y	N
FAM47E-STBD1	ENSG00000118804	A	N	Y	N
