# Supplementary material for: The Transcriptomic Landscape of Age-Induced Changes in Human Visceral Fat and the Predicted Omentum-Liver Connectome in Males
Source: Biomedicines. 2023 May 14;11(5):1446. doi: 10.3390/biomedicines11051446 (PMC10216224; doi:10.3390/biomedicines11051446)
Supplement: Supplementary file 1 [file biomedicines-11-01446-s001.zip › Material_S4.xlsx]

## Sheet: Whole cluster
Source.Name	Cluster	Term	Overlap	P-value	Adjusted P-value	Old P-value	Old Adjusted P-value	Z-score	Combined Score	Genes
ENCODE_and_ChEA_Consensus_TFs_from_ChIP-X_	A	SALL4_CHEA	8/355	0.000686619	0.0604225	0.000789668	0.0694908	-2	12	PLN;EIF5;ADRB3;KCNB1;FASN;ADIPOR2;SLC39A14;HK2
ENCODE_and_ChEA_Consensus_TFs_from_ChIP-X_	A	NELFE_ENCODE	5/234	0.00883506	0.388743	0.00971948	0.427657	-2	9	EIF5;FASN;JUNB;GLUL;EIF4G2
ENCODE_and_ChEA_Consensus_TFs_from_ChIP-X_	A	POU5F1_CHEA	5/261	0.013678	0.40122	0.0148903	0.429707	-2	7	SCD;FASN;ADIPOR2;SLC39A14;HK2
ENCODE_and_ChEA_Consensus_TFs_from_ChIP-X_	A	TP63_CHEA	14/1399	0.0183207	0.403056	0.0195321	0.429707	-1	6	DUSP4;IL1RN;LAMB3;MUSK;ACSL1;TREH;SLC1A3;PARVA;IGF1;AACS;HK2;FASN;PPIF;PTPN3
ENCODE_and_ChEA_Consensus_TFs_from_ChIP-X_	A	GATA1_CHEA	8/807	0.0706766	0.741175	0.0747342	0.78092	-1	4	CISH;BDH1;FIBCD1;EIF4EBP1;SLC16A10;JUNB;GLUL;TTC39A
ENCODE_and_ChEA_Consensus_TFs_from_ChIP-X_	A	HNF4A_ENCODE	11/1276	0.0834254	0.741175	0.0881855	0.78092	-2	4	TF;FAM47E-STBD1;FNDC4;BDH1;MOGAT2;USP10;SCD;TPD52L2;JUNB;SLC39A14;VEGFA
ENCODE_and_ChEA_Consensus_TFs_from_ChIP-X_	A	SUZ12_CHEA	14/1684	0.0691821	0.741175	0.0732178	0.78092	-1	4	DUSP4;DUSP2;SPON1;GPR37;PCDH10;ECEL1;FIBCD1;KIAA1549L;PARVA;FOXL1;CLMP;PAX8;NRCAM;NTSR2
ENCODE_and_ChEA_Consensus_TFs_from_ChIP-X_	A	TCF3_ENCODE	8/840	0.0845706	0.741175	0.0892186	0.78092	-1	3	DUSP2;EIF5;ACSL1;PSMD3;EIF4EBP1;JUNB;EIF4G2;VEGFA
ENCODE_and_ChEA_Consensus_TFs_from_ChIP-X_	A	MYC_CHEA	6/573	0.0901781	0.741175	0.094826	0.78092	-1	3	EIF5;PCDH10;USP10;FASN;EIF4EBP1;ANGPTL4
ENCODE_and_ChEA_Consensus_TFs_from_ChIP-X_	A	REST_CHEA	11/1280	0.0848471	0.741175	0.0896742	0.78092	-1	3	DUSP2;PAX8;ADRB3;TUBB3;VEPH1;ECEL1;NRCAM;SULT4A1;HK2;FADS1;NTSR2
ENCODE_and_ChEA_Consensus_TFs_from_ChIP-X_	A	UBTF_ENCODE	13/1631	0.100796	0.741175	0.106441	0.78092	-1	3	SMIM3;ACSL1;SRCIN1;FGFRL1;VEGFA;SLC6A8;PSAT1;FASN;NACC1;PSMD3;LPIN1;GLUL;EIF4G2
ENCODE_and_ChEA_Consensus_TFs_from_ChIP-X_	A	NFE2L2_CHEA	9/1022	0.101069	0.741175	0.106489	0.78092	-1	3	DUSP4;TTC36;PLN;TUBB3;PPIF;IGF1;NTS;AACS;VEGFA
ENCODE_and_ChEA_Consensus_TFs_from_ChIP-X_	A	RAD21_ENCODE	10/1265	0.145288	0.879493	0.152611	0.904676	-1	3	NAA50;KCNB1;HAUS7;PSMD3;PPIF;KIAA1549L;NTS;TPD52L2;F5;VEGFA
ENCODE_and_ChEA_Consensus_TFs_from_ChIP-X_	A	PPARG_CHEA	5/535	0.163486	0.879493	0.170071	0.904676	-1	2	ACSL1;SCD;SLC16A10;ANGPTL4;VEGFA
ENCODE_and_ChEA_Consensus_TFs_from_ChIP-X_	A	ERG_CHEA	2/144	0.182666	0.879493	0.188173	0.904676	-1	2	DUSP4;ACSL1
ENCODE_and_ChEA_Consensus_TFs_from_ChIP-X_	A	RFX5_ENCODE	5/559	0.185027	0.879493	0.192124	0.904676	-1	2	PSAT1;SCD;FASN;PSMD3;JUNB
ENCODE_and_ChEA_Consensus_TFs_from_ChIP-X_	A	PPARD_CHEA	3/285	0.199826	0.879493	0.206145	0.904676	-1	2	GGCT;FOXL1;ANGPTL4
ENCODE_and_ChEA_Consensus_TFs_from_ChIP-X_	A	ZBTB7A_ENCODE	15/2184	0.197619	0.879493	0.208018	0.904676	-1	2	USP10;MOCOS;TMEM52;SRCIN1;VEGFA;FNDC4;EIF5;TUBB3;FASN;EIF4EBP1;PPIF;DHCR7;JUNB;GLUL;FADS1
ENCODE_and_ChEA_Consensus_TFs_from_ChIP-X_	A	SRF_ENCODE	3/299	0.219376	0.879493	0.225977	0.904676	-1	2	NACC1;PSMD3;JUNB
ENCODE_and_ChEA_Consensus_TFs_from_ChIP-X_	A	NANOG_CHEA	5/595	0.219153	0.879493	0.226989	0.904676	-1	2	SCD;IGF1;GLUL;SLC27A2;SLC39A14
ENCODE_and_ChEA_Consensus_TFs_from_ChIP-X_	A	HDAC2_ENCODE	2/175	0.243862	0.879493	0.249955	0.904676	-1	1	KCNB1;PSMD3
ENCODE_and_ChEA_Consensus_TFs_from_ChIP-X_	A	MYOD1_ENCODE	2/166	0.225928	0.879493	0.231867	0.904676	-1	1	MUSK;TRIM55
ENCODE_and_ChEA_Consensus_TFs_from_ChIP-X_	A	PBX3_ENCODE	9/1269	0.246562	0.879493	0.25701	0.904676	-1	1	EIF5;PCDH10;HAUS7;FASN;DHCR7;ATF5;JUNB;AACS;EIF4G2
ENCODE_and_ChEA_Consensus_TFs_from_ChIP-X_	A	FOXP2_ENCODE	2/178	0.249856	0.879493	0.255997	0.904676	-1	1	DUSP4;JUNB
ENCODE_and_ChEA_Consensus_TFs_from_ChIP-X_	A	STAT3_CHEA	2/177	0.247857	0.879493	0.253983	0.904676	-1	1	SLC27A2;HK2
ENCODE_and_ChEA_Consensus_TFs_from_ChIP-X_	A	NFYB_ENCODE	23/3715	0.267225	0.898479	0.28286	0.932074	-1	1	CISH;FIBCD1;TMEM52;TPD52L2;ADIPOR2;HK2;GGCT;RNF157;ACLY;EIF5;TUBB3;HAUS7;PSAT1;SCD;FASN;NACC1;PSMD3;PPIF;DHCR7;JUNB;GLUL;EIF4G2;FADS1
ENCODE_and_ChEA_Consensus_TFs_from_ChIP-X_	A	FOSL2_ENCODE	2/196	0.285864	0.898479	0.292264	0.932074	-1	1	EIF5;TUBB3
ENCODE_and_ChEA_Consensus_TFs_from_ChIP-X_	A	NR2C2_ENCODE	3/350	0.293215	0.898479	0.300692	0.932074	-1	1	NAA50;NACC1;PSMD3
ENCODE_and_ChEA_Consensus_TFs_from_ChIP-X_	A	SMC3_ENCODE	8/1181	0.3063	0.898479	0.317753	0.932074	-1	1	CISH;KCNB1;HAUS7;PPIF;NTS;TPD52L2;SRCIN1;VEGFA
ENCODE_and_ChEA_Consensus_TFs_from_ChIP-X_	A	REST_ENCODE	3/383	0.341983	0.900087	0.349897	0.937315	-1	1	KCNB1;HAUS7;NTSR2
ENCODE_and_ChEA_Consensus_TFs_from_ChIP-X_	A	MYC_ENCODE	10/1515	0.301521	0.898479	0.313994	0.932074	-1	1	ACLY;SCD;FASN;NACC1;EIF4EBP1;PPIF;ATF5;TPD52L2;SLC39A14;VEGFA
ENCODE_and_ChEA_Consensus_TFs_from_ChIP-X_	A	EZH2_CHEA	2/237	0.366855	0.900087	0.373672	0.937315	-1	1	ECEL1;FIBCD1
ENCODE_and_ChEA_Consensus_TFs_from_ChIP-X_	A	ZMIZ1_ENCODE	6/914	0.372387	0.900087	0.383551	0.937315	-1	1	ACLY;DUSP2;FASN;JUNB;GLUL;VEGFA
ENCODE_and_ChEA_Consensus_TFs_from_ChIP-X_	A	CTCF_ENCODE	11/1790	0.373014	0.900087	0.387934	0.937315	0	0	NAA50;SLC6A8;KCNB1;HAUS7;FASN;PSMD3;PPIF;TPD52L2;SRCIN1;FADS1;VEGFA
ENCODE_and_ChEA_Consensus_TFs_from_ChIP-X_	A	SMAD4_CHEA	4/584	0.387709	0.900087	0.397101	0.937315	0	0	EIF5;NRCAM;ADCY2;LPIN1
ENCODE_and_ChEA_Consensus_TFs_from_ChIP-X_	A	AR_CHEA	7/1095	0.37922	0.900087	0.39133	0.937315	0	0	USP10;PSAT1;FIBCD1;PARVA;IGF1;ACACA;IP6K3
ENCODE_and_ChEA_Consensus_TFs_from_ChIP-X_	A	GATA2_CHEA	5/772	0.404801	0.913398	0.415401	0.937315	0	0	DUSP2;PSMD3;PPIF;ASCC2;SRCIN1
ENCODE_and_ChEA_Consensus_TFs_from_ChIP-X_	A	E2F6_ENCODE	19/3245	0.388674	0.900087	0.408926	0.937315	0	0	NAA50;GPR37;CISH;MOCOS;TPD52L2;SLC39A14;FGFRL1;ACACA;GGCT;RNF157;PSAT1;FASN;PSMD3;EIF4EBP1;PPIF;ATF5;SLC27A2;FADS1;NTSR2
ENCODE_and_ChEA_Consensus_TFs_from_ChIP-X_	A	FOS_ENCODE	4/637	0.452111	0.970384	0.461948	0.991499	0	0	EIF5;PSAT1;DHCR7;TPD52L2
ENCODE_and_ChEA_Consensus_TFs_from_ChIP-X_	A	RELA_ENCODE	3/484	0.487264	0.993655	0.495903	0.999635	0	0	DUSP2;CCL3;JUNB
ENCODE_and_ChEA_Consensus_TFs_from_ChIP-X_	A	PML_ENCODE	9/1596	0.496828	0.993655	0.512299	0.999635	0	0	EIF5;FASN;PPIF;ATF5;TPD52L2;JUNB;GLUL;EIF4G2;VEGFA
ENCODE_and_ChEA_Consensus_TFs_from_ChIP-X_	A	EZH2_ENCODE	2/338	0.547338	0.999506	0.554374	0.999635	0	0	RNF157;SPON1
ENCODE_and_ChEA_Consensus_TFs_from_ChIP-X_	A	TP53_CHEA	2/319	0.516122	0.999506	0.523188	0.999635	0	0	FOXL1;TRIM55
ENCODE_and_ChEA_Consensus_TFs_from_ChIP-X_	A	YY1_ENCODE	5/2753	0.999506	0.999506	0.999635	0.999635	2	0	NAA50;EIF5;USP10;NACC1;EIF4G2
ENCODE_and_ChEA_Consensus_TFs_from_ChIP-X_	A	GABPA_ENCODE	3/2082	0.999375	0.999506	0.999495	0.999635	1	0	NAA50;TPD52L2;JUNB
ENCODE_and_ChEA_Consensus_TFs_from_ChIP-X_	A	CREB1_ENCODE	4/2238	0.998631	0.999506	0.998897	0.999635	1	0	HAUS7;PSMD3;TPD52L2;ADIPOR2
ENCODE_and_ChEA_Consensus_TFs_from_ChIP-X_	A	ELF1_ENCODE	5/2483	0.998292	0.999506	0.998654	0.999635	1	0	NACC1;ASCC2;TPD52L2;JUNB;ADIPOR2
ENCODE_and_ChEA_Consensus_TFs_from_ChIP-X_	A	SIX5_ENCODE	1/1094	0.997739	0.999506	0.997938	0.999635	1	0	ACLY
ENCODE_and_ChEA_Consensus_TFs_from_ChIP-X_	A	TAF1_ENCODE	9/3346	0.996253	0.999506	0.99724	0.999635	1	0	EIF5;FASN;NACC1;PSMD3;ATF5;TPD52L2;JUNB;EIF4G2;ACACA
ENCODE_and_ChEA_Consensus_TFs_from_ChIP-X_	A	BRCA1_ENCODE	9/3218	0.993941	0.999506	0.995387	0.999635	1	0	NAA50;EIF5;PSAT1;EIF4EBP1;ATF5;TPD52L2;JUNB;FADS1;ULBP3
ENCODE_and_ChEA_Consensus_TFs_from_ChIP-X_	A	BCLAF1_ENCODE	1/851	0.990985	0.999506	0.991539	0.999635	1	0	JUNB
ENCODE_and_ChEA_Consensus_TFs_from_ChIP-X_	A	SPI1_ENCODE	3/1540	0.991362	0.999506	0.992318	0.999635	1	0	EIF5;NTS;TPD52L2
ENCODE_and_ChEA_Consensus_TFs_from_ChIP-X_	A	E2F1_CHEA	1/859	0.991384	0.999506	0.991921	0.999635	1	0	ADIPOR2
ENCODE_and_ChEA_Consensus_TFs_from_ChIP-X_	A	ATF2_ENCODE	8/2852	0.990537	0.999506	0.992423	0.999635	1	0	NAA50;EIF5;NACC1;PSMD3;DHCR7;ATF5;TPD52L2;EIF4G2
ENCODE_and_ChEA_Consensus_TFs_from_ChIP-X_	A	USF1_ENCODE	3/1423	0.985281	0.999506	0.986696	0.999635	1	0	NAA50;NACC1;TPD52L2
ENCODE_and_ChEA_Consensus_TFs_from_ChIP-X_	A	ZBTB33_ENCODE	1/702	0.979131	0.999506	0.980122	0.999635	1	0	EIF5
ENCODE_and_ChEA_Consensus_TFs_from_ChIP-X_	A	NRF1_ENCODE	5/1882	0.978778	0.999506	0.981292	0.999635	1	0	NAA50;USP10;ATF5;ADIPOR2;FADS1
ENCODE_and_ChEA_Consensus_TFs_from_ChIP-X_	A	SP1_ENCODE	1/707	0.979708	0.999506	0.980681	0.999635	1	0	GGCT
ENCODE_and_ChEA_Consensus_TFs_from_ChIP-X_	A	CREB1_CHEA	8/1444	0.52302	0.999506	0.537736	0.999635	0	0	ACLY;PSMD3;PARVA;TPD52L2;JUNB;SULT4A1;AACS;HK2
ENCODE_and_ChEA_Consensus_TFs_from_ChIP-X_	A	SP2_ENCODE	2/994	0.97326	0.999506	0.974963	0.999635	1	0	GGCT;EIF5
ENCODE_and_ChEA_Consensus_TFs_from_ChIP-X_	A	NFYA_ENCODE	12/2250	0.563608	0.999506	0.582646	0.999635	0	0	GGCT;ACLY;EIF5;CISH;HAUS7;PSAT1;SCD;FASN;DHCR7;TPD52L2;GLUL;EIF4G2
ENCODE_and_ChEA_Consensus_TFs_from_ChIP-X_	A	SOX2_CHEA	4/775	0.606763	0.999506	0.616846	0.999635	0	0	SMIM3;ALPK3;ADIPOR2;SLC39A14
ENCODE_and_ChEA_Consensus_TFs_from_ChIP-X_	A	EGR1_ENCODE	1/537	0.947526	0.999506	0.949318	0.999635	1	0	NACC1
ENCODE_and_ChEA_Consensus_TFs_from_ChIP-X_	A	TCF7L2_ENCODE	3/583	0.61345	0.999506	0.622026	0.999635	0	0	DUSP4;NAA50;MT1X
ENCODE_and_ChEA_Consensus_TFs_from_ChIP-X_	A	SIN3A_ENCODE	3/1131	0.947912	0.999506	0.951264	0.999635	1	0	NACC1;LPIN1;JUNB
ENCODE_and_ChEA_Consensus_TFs_from_ChIP-X_	A	STAT3_ENCODE	2/725	0.906738	0.999506	0.910474	0.999635	1	0	NAA50;JUNB
ENCODE_and_ChEA_Consensus_TFs_from_ChIP-X_	A	SPI1_CHEA	3/1056	0.929206	0.999506	0.933259	0.999635	1	0	EIF5;ASCC2;JUNB
ENCODE_and_ChEA_Consensus_TFs_from_ChIP-X_	A	CEBPD_ENCODE	2/734	0.91042	0.999506	0.914071	0.999635	1	0	JUNB;EIF4G2
ENCODE_and_ChEA_Consensus_TFs_from_ChIP-X_	A	ZNF384_ENCODE	2/730	0.908801	0.999506	0.912489	0.999635	1	0	NAA50;USP10
ENCODE_and_ChEA_Consensus_TFs_from_ChIP-X_	A	USF2_ENCODE	3/965	0.898448	0.999506	0.903445	0.999635	1	0	NAA50;FASN;NACC1
ENCODE_and_ChEA_Consensus_TFs_from_ChIP-X_	A	TAF7_ENCODE	2/640	0.86442	0.999506	0.868993	0.999635	0	0	FASN;JUNB
ENCODE_and_ChEA_Consensus_TFs_from_ChIP-X_	A	IRF3_ENCODE	2/663	0.877331	0.999506	0.881672	0.999635	1	0	GGCT;EIF5
ENCODE_and_ChEA_Consensus_TFs_from_ChIP-X_	A	FLI1_ENCODE	2/650	0.870178	0.999506	0.87465	0.999635	1	0	NAA50;PPIF
ENCODE_and_ChEA_Consensus_TFs_from_ChIP-X_	A	CHD1_ENCODE	2/655	0.872973	0.999506	0.877395	0.999635	1	0	EIF5;JUNB
ENCODE_and_ChEA_Consensus_TFs_from_ChIP-X_	A	FOXA2_ENCODE	1/316	0.82177	0.999506	0.825263	0.999635	0	0	JUNB
ENCODE_and_ChEA_Consensus_TFs_from_ChIP-X_	A	KLF4_CHEA	5/987	0.621429	0.999506	0.632829	0.999635	0	0	USP10;TUBB3;JUNB;ADIPOR2;AACS
ENCODE_and_ChEA_Consensus_TFs_from_ChIP-X_	A	TCF3_CHEA	5/1006	0.638339	0.999506	0.64968	0.999635	0	0	SLC1A3;PDE8B;ADIPOR2;SRCIN1;SLC39A14
ENCODE_and_ChEA_Consensus_TFs_from_ChIP-X_	A	NFIC_ENCODE	1/279	0.781574	0.999506	0.785405	0.999635	0	0	ACLY
ENCODE_and_ChEA_Consensus_TFs_from_ChIP-X_	A	RCOR1_ENCODE	3/702	0.735574	0.999506	0.743367	0.999635	0	0	SCD;ATF5;VEGFA
ENCODE_and_ChEA_Consensus_TFs_from_ChIP-X_	A	MAX_ENCODE	10/2073	0.693452	0.999506	0.710393	0.999635	0	0	NAA50;SCD;FASN;NACC1;EIF4EBP1;DHCR7;ATF5;TPD52L2;JUNB;FADS1
ENCODE_and_ChEA_Consensus_TFs_from_ChIP-X_	A	RUNX1_CHEA	6/1294	0.706922	0.999506	0.719077	0.999635	0	0	DUSP4;ACSL1;PPIF;JUNB;ADIPOR2;FADS1
ENCODE_and_ChEA_Consensus_TFs_from_ChIP-X_	A	IRF1_ENCODE	1/263	0.761523	0.999506	0.765502	0.999635	0	0	ANKRD53
ENCODE_and_ChEA_Consensus_TFs_from_ChIP-X_	A	TRIM28_CHEA	1/210	0.681162	0.999506	0.685621	0.999635	0	0	FOXL1
ENCODE_and_ChEA_Consensus_TFs_from_ChIP-X_	A	ZKSCAN1_ENCODE	1/120	0.478842	0.993655	0.484003	0.999635	0	0	LPIN1
ENCODE_and_ChEA_Consensus_TFs_from_ChIP-X_	A	ZEB1_ENCODE	1/106	0.437558	0.962627	0.442802	0.974165	0	0	DHCR7
ENCODE_and_ChEA_Consensus_TFs_from_ChIP-X_	A	ESR1_CHEA	1/154	0.567022	0.999506	0.571945	0.999635	0	0	SLC16A10
ENCODE_and_ChEA_Consensus_TFs_from_ChIP-X_	A	ETS1_ENCODE	1/156	0.571722	0.999506	0.57663	0.999635	0	0	JUNB
ENCODE_and_ChEA_Consensus_TFs_from_ChIP-X_	A	KAT2A_ENCODE	1/90	0.386397	0.900087	0.391724	0.937315	0	0	ATF5
ENCODE_and_ChEA_Consensus_TFs_from_ChIP-X_	B	HNF4A_ENCODE	17/1276	2.57975e-05	0.0020896	0.000104487	0.00846345	-2	18	CEBPA;CYB5A;FBXW5;MRPS11;GPT;NAP1L4;GCHFR;HADHB;ADH4;RBP4;MMP15;AIFM2;ORMDL3;MLX;PNPLA3;ACO1;PCK1
ENCODE_and_ChEA_Consensus_TFs_from_ChIP-X_	B	SUZ12_CHEA	18/1684	0.000247367	0.0100184	0.00092666	0.0375297	-2	13	ALK;CEBPA;EGR2;DGAT2;MOGAT1;RORB;SLC7A10;GLIS1;GLDN;RBP4;GLRB;MMP15;RTN4RL1;DMRTA1;FFAR4;PRR18;PLXNA4;WLS
ENCODE_and_ChEA_Consensus_TFs_from_ChIP-X_	B	SMC3_ENCODE	13/1181	0.00154719	0.0417742	0.00415981	0.112315	-2	10	ALK;EGR2;ACSS2;ATMIN;CHCHD10;FITM2;PTPRF;APMAP;RTN4RL1;MPC1;MC5R;TYRO3;RAC3
ENCODE_and_ChEA_Consensus_TFs_from_ChIP-X_	B	RAD21_ENCODE	13/1265	0.00283179	0.0573437	0.00732357	0.148302	-2	10	ALK;EGR2;ACSS2;C11ORF86;ATMIN;CHCHD10;FITM2;HSD17B10;PTPRF;RTN4RL1;MC5R;TYRO3;RAC3
ENCODE_and_ChEA_Consensus_TFs_from_ChIP-X_	B	ZC3H11A_ENCODE	3/129	0.0181924	0.255263	0.0255501	0.413912	-2	6	ACSS2;APMAP;PTPRF
ENCODE_and_ChEA_Consensus_TFs_from_ChIP-X_	B	ERG_CHEA	3/144	0.0242355	0.280439	0.0336283	0.43567	-2	6	ACO1;NDUFV3;TKT
ENCODE_and_ChEA_Consensus_TFs_from_ChIP-X_	B	AR_CHEA	10/1095	0.0189084	0.255263	0.0376505	0.43567	-1	6	GHR;CYB5A;FABP5;DMRTA1;SLC35C1;RAC3;ACO1;PTPRF;PGM1;WLS
ENCODE_and_ChEA_Consensus_TFs_from_ChIP-X_	B	PPARG_CHEA	6/535	0.0277494	0.280962	0.0451566	0.45721	-1	5	MRAP;ABCD2;FABP5;ORMDL3;G0S2;FAM98A
ENCODE_and_ChEA_Consensus_TFs_from_ChIP-X_	B	CTCF_ENCODE	13/1790	0.0418895	0.377006	0.0864332	0.768119	-1	4	CEBPA;EGR2;ACSS2;FBXW5;ATMIN;FITM2;PTPRF;GHR;RTN4RL1;MPC1;MC5R;TYRO3;RAC3
ENCODE_and_ChEA_Consensus_TFs_from_ChIP-X_	B	ZEB1_ENCODE	2/106	0.076347	0.61841	0.0948295	0.768119	-2	4	CYB5A;ATMIN
ENCODE_and_ChEA_Consensus_TFs_from_ChIP-X_	B	ZKSCAN1_ENCODE	2/120	0.0943175	0.69452	0.11617	0.855436	-1	3	TYRO3;TKT
ENCODE_and_ChEA_Consensus_TFs_from_ChIP-X_	B	PPARD_CHEA	3/285	0.124479	0.840236	0.160248	0.999761	-1	3	HADHB;PSMB6;MRPS11
ENCODE_and_ChEA_Consensus_TFs_from_ChIP-X_	B	EGR1_CHEA	3/315	0.154054	0.959873	0.195956	0.999761	-1	2	HADHB;EGR2;ECHDC3
ENCODE_and_ChEA_Consensus_TFs_from_ChIP-X_	B	EZH2_ENCODE	3/338	0.178085	0.995483	0.224556	0.999761	-1	2	MMP15;CSPG5;PLXNA4
ENCODE_and_ChEA_Consensus_TFs_from_ChIP-X_	B	REST_CHEA	8/1280	0.184349	0.995483	0.275304	0.999761	-1	2	ALK;GLRB;MGAT3;PNPLA3;FITM2;PLXNA4;GLDN;COX10
ENCODE_and_ChEA_Consensus_TFs_from_ChIP-X_	B	TRIM28_CHEA	2/210	0.228338	0.998965	0.270467	0.999761	-1	2	PARP1;TKT
ENCODE_and_ChEA_Consensus_TFs_from_ChIP-X_	B	NFYB_ENCODE	19/3715	0.236876	0.998965	0.427371	0.999761	-1	2	GCDH;COPB2;ACSS2;TRAPPC1;IDH3G;SHMT1;GPT;PGD;HSD17B10;ARFGAP2;NAP1L4;GCHFR;NSDHL;MPC1;ORMDL3;MLX;SUCLG2;NDUFV3;ACOT4
ENCODE_and_ChEA_Consensus_TFs_from_ChIP-X_	B	NFYA_ENCODE	12/2250	0.257545	0.998965	0.400946	0.999761	-1	1	GCDH;NSDHL;ACSS2;IDH3G;MPC1;SHMT1;SUCLG2;NDUFV3;PGD;HSD17B10;ARFGAP2;NAP1L4
ENCODE_and_ChEA_Consensus_TFs_from_ChIP-X_	B	EZH2_CHEA	2/237	0.27131	0.998965	0.318411	0.999761	-1	1	PLXNA4;GLIS1
ENCODE_and_ChEA_Consensus_TFs_from_ChIP-X_	B	TCF3_CHEA	6/1006	0.264387	0.998965	0.357387	0.999761	-1	1	CEBPA;PARP1;MGAT3;TYRO3;CHCHD10;FAM98A
ENCODE_and_ChEA_Consensus_TFs_from_ChIP-X_	B	NFIC_ENCODE	2/279	0.337913	0.998965	0.391384	0.999761	-1	1	GCHFR;MLX
ENCODE_and_ChEA_Consensus_TFs_from_ChIP-X_	B	SRF_ENCODE	2/299	0.369073	0.998965	0.424974	0.999761	-1	1	FBXW5;ORMDL3
ENCODE_and_ChEA_Consensus_TFs_from_ChIP-X_	B	RCOR1_ENCODE	4/702	0.356978	0.998965	0.440747	0.999761	-1	1	GCHFR;MPC1;SHMT1;TKT
ENCODE_and_ChEA_Consensus_TFs_from_ChIP-X_	B	STAT3_ENCODE	4/725	0.379578	0.998965	0.465405	0.999761	-1	1	HADHB;ACSS2;MRPS11;G0S2
ENCODE_and_ChEA_Consensus_TFs_from_ChIP-X_	B	EGR1_ENCODE	3/537	0.407643	0.998965	0.482009	0.999761	-1	1	FBXW5;PGD;SLC29A2
ENCODE_and_ChEA_Consensus_TFs_from_ChIP-X_	B	MAX_ENCODE	10/2073	0.400422	0.998965	0.550144	0.999761	-1	1	HADHB;DGAT2;PARP1;FABP5;IDH3G;SLC35C1;FITM2;FAM98A;PGD;COX10
ENCODE_and_ChEA_Consensus_TFs_from_ChIP-X_	B	YY1_CHEA	2/332	0.419188	0.998965	0.478258	0.999761	-1	1	MRPS11;COX10
ENCODE_and_ChEA_Consensus_TFs_from_ChIP-X_	B	KLF4_CHEA	5/987	0.419995	0.998965	0.520936	0.999761	-1	1	CYB5A;PARP1;FABP5;SCO1;MPC1
ENCODE_and_ChEA_Consensus_TFs_from_ChIP-X_	B	BHLHE40_ENCODE	2/348	0.442777	0.998965	0.503021	0.999761	-1	1	DGAT2;AIFM2
ENCODE_and_ChEA_Consensus_TFs_from_ChIP-X_	B	E2F6_ENCODE	15/3245	0.423849	0.998965	0.617279	0.999761	-1	1	CEBPA;DGAT2;PARP1;SHMT1;C2CD4B;PGD;GCHFR;FABP5;APMAP;MMP15;AIFM2;MPC1;ECHDC3;FAM98A;STOX1
ENCODE_and_ChEA_Consensus_TFs_from_ChIP-X_	B	VDR_CHEA	1/76	0.279725	0.998965	0.310032	0.999761	0	0	ABCD2
ENCODE_and_ChEA_Consensus_TFs_from_ChIP-X_	B	NR2C2_ENCODE	2/350	0.44569	0.998965	0.506064	0.999761	-1	0	FBXW5;PGD
ENCODE_and_ChEA_Consensus_TFs_from_ChIP-X_	B	REST_ENCODE	2/383	0.492503	0.998965	0.554537	0.999761	-1	0	ALK;TKT
ENCODE_and_ChEA_Consensus_TFs_from_ChIP-X_	B	RUNX1_CHEA	6/1294	0.485448	0.998965	0.600063	0.999761	-1	0	FBXW5;SLC35C1;ORMDL3;TKT;PTPRF;PGM1
ENCODE_and_ChEA_Consensus_TFs_from_ChIP-X_	B	E2F1_CHEA	4/859	0.508014	0.998965	0.599856	0.999761	0	0	GCDH;SCO1;NDUFV3;PGD
ENCODE_and_ChEA_Consensus_TFs_from_ChIP-X_	B	CHD1_ENCODE	3/655	0.538106	0.998965	0.616689	0.999761	0	0	DGAT2;MRPS11;NDUFV3
ENCODE_and_ChEA_Consensus_TFs_from_ChIP-X_	B	ETS1_ENCODE	1/156	0.490778	0.998965	0.531694	0.999761	0	0	ORMDL3
ENCODE_and_ChEA_Consensus_TFs_from_ChIP-X_	B	UBTF_ENCODE	7/1631	0.559024	0.998965	0.68239	0.999761	0	0	EGR2;ATMIN;RTN4RL1;MPC1;TYRO3;STOX1;ARFGAP2
ENCODE_and_ChEA_Consensus_TFs_from_ChIP-X_	B	TP63_CHEA	6/1399	0.563102	0.998965	0.676536	0.999761	0	0	HADHB;ALK;CEBPA;NSDHL;FABP5;WLS
ENCODE_and_ChEA_Consensus_TFs_from_ChIP-X_	B	ZBTB33_ENCODE	3/702	0.5855	0.998965	0.66349	0.999761	0	0	COPB2;TRAPPC1;IDH3G
ENCODE_and_ChEA_Consensus_TFs_from_ChIP-X_	B	NRF1_ENCODE	8/1882	0.567699	0.998965	0.699679	0.999761	0	0	GCHFR;FBXW5;TRAPPC1;SHMT1;MLX;FITM2;FAM98A;NAP1L4
ENCODE_and_ChEA_Consensus_TFs_from_ChIP-X_	B	E2F4_ENCODE	3/710	0.593262	0.998965	0.671041	0.999761	0	0	MRPS11;SHMT1;NAP1L4
ENCODE_and_ChEA_Consensus_TFs_from_ChIP-X_	B	STAT5A_ENCODE	1/233	0.63576	0.998965	0.678103	0.999761	0	0	PGD
ENCODE_and_ChEA_Consensus_TFs_from_ChIP-X_	B	YY1_ENCODE	11/2753	0.65081	0.998965	0.795846	0.999761	0	0	HADHB;PSMB6;IDH3G;MRPS11;SUCLG2;CHCHD10;NDUFV3;HSD17B10;COX10;ARFGAP2;NAP1L4
ENCODE_and_ChEA_Consensus_TFs_from_ChIP-X_	B	GATA1_CHEA	3/807	0.679843	0.998965	0.752999	0.999761	0	0	GCHFR;PLXNA4;PTPRF
ENCODE_and_ChEA_Consensus_TFs_from_ChIP-X_	B	MYC_CHEA	2/573	0.710322	0.998965	0.768117	0.999761	0	0	PARP1;SHMT1
ENCODE_and_ChEA_Consensus_TFs_from_ChIP-X_	B	IRF1_ENCODE	1/263	0.680451	0.998965	0.721989	0.999761	0	0	IDH3G
ENCODE_and_ChEA_Consensus_TFs_from_ChIP-X_	B	SMAD4_CHEA	2/584	0.720205	0.998965	0.777273	0.999761	0	0	ALK;PLXNA4
ENCODE_and_ChEA_Consensus_TFs_from_ChIP-X_	B	ATF2_ENCODE	4/2852	0.998965	0.998965	0.999761	0.999761	1	0	COPB2;TRAPPC1;MRPS11;ORMDL3
ENCODE_and_ChEA_Consensus_TFs_from_ChIP-X_	B	PML_ENCODE	2/1596	0.993454	0.998965	0.997107	0.999761	1	0	PSMB6;ARFGAP2
ENCODE_and_ChEA_Consensus_TFs_from_ChIP-X_	B	NANOG_CHEA	2/595	0.729807	0.998965	0.786116	0.999761	0	0	MGAT3;CHCHD10
ENCODE_and_ChEA_Consensus_TFs_from_ChIP-X_	B	TCF3_ENCODE	3/840	0.706061	0.998965	0.776942	0.999761	0	0	EGR2;TRAPPC1;FAM98A
ENCODE_and_ChEA_Consensus_TFs_from_ChIP-X_	B	ELF1_ENCODE	5/2483	0.986319	0.998965	0.995245	0.999761	1	0	SCO1;APMAP;MRPS11;SLC35C1;COX10
ENCODE_and_ChEA_Consensus_TFs_from_ChIP-X_	B	GABPA_ENCODE	4/2082	0.982852	0.998965	0.993055	0.999761	1	0	TRAPPC1;SCO1;APMAP;COX10
ENCODE_and_ChEA_Consensus_TFs_from_ChIP-X_	B	SOX2_CHEA	1/775	0.966832	0.998965	0.97822	0.999761	1	0	CYB5A
ENCODE_and_ChEA_Consensus_TFs_from_ChIP-X_	B	SPI1_ENCODE	3/1540	0.966083	0.998965	0.982643	0.999761	1	0	HADHB;SCO1;CCL4
ENCODE_and_ChEA_Consensus_TFs_from_ChIP-X_	B	CEBPD_ENCODE	1/734	0.960147	0.998965	0.973207	0.999761	1	0	MRPS11
ENCODE_and_ChEA_Consensus_TFs_from_ChIP-X_	B	MYC_ENCODE	3/1515	0.963034	0.998965	0.980791	0.999761	1	0	PARP1;COX10;SLC29A2
ENCODE_and_ChEA_Consensus_TFs_from_ChIP-X_	B	IRF3_ENCODE	1/663	0.945279	0.998965	0.961698	0.999761	1	0	PGD
ENCODE_and_ChEA_Consensus_TFs_from_ChIP-X_	B	USF1_ENCODE	3/1423	0.949502	0.998965	0.972256	0.999761	1	0	CEBPA;SHMT1;MLX
ENCODE_and_ChEA_Consensus_TFs_from_ChIP-X_	B	ZBTB7A_ENCODE	8/2184	0.73522	0.998965	0.843113	0.999761	0	0	CEBPA;FBXW5;SCO1;MMP15;MPC1;CHCHD10;ARFGAP2;SLC29A2
ENCODE_and_ChEA_Consensus_TFs_from_ChIP-X_	B	SPI1_CHEA	2/1056	0.945783	0.998965	0.966627	0.999761	1	0	CCL4;FFAR4
ENCODE_and_ChEA_Consensus_TFs_from_ChIP-X_	B	BRCA1_ENCODE	9/3218	0.948643	0.998965	0.982384	0.999761	1	0	COPB2;NSDHL;TRAPPC1;ATMIN;APMAP;IDH3G;ORMDL3;PGD;NAP1L4
ENCODE_and_ChEA_Consensus_TFs_from_ChIP-X_	B	RFX5_ENCODE	1/559	0.913118	0.998965	0.935547	0.999761	1	0	NDUFV3
ENCODE_and_ChEA_Consensus_TFs_from_ChIP-X_	B	FLI1_ENCODE	2/650	0.773767	0.998965	0.82591	0.999761	0	0	SCO1;COX10
ENCODE_and_ChEA_Consensus_TFs_from_ChIP-X_	B	TCF7L2_ENCODE	1/583	0.921892	0.998965	0.942823	0.999761	1	0	MRPS11
ENCODE_and_ChEA_Consensus_TFs_from_ChIP-X_	B	PBX3_ENCODE	3/1269	0.916389	0.998965	0.949713	0.999761	1	0	CYB5A;IDH3G;PGD
ENCODE_and_ChEA_Consensus_TFs_from_ChIP-X_	B	ZMIZ1_ENCODE	2/914	0.908844	0.998965	0.93917	0.999761	1	0	TKT;NAP1L4
ENCODE_and_ChEA_Consensus_TFs_from_ChIP-X_	B	USF2_ENCODE	2/965	0.9242	0.998965	0.950848	0.999761	1	0	SHMT1;MLX
ENCODE_and_ChEA_Consensus_TFs_from_ChIP-X_	B	SP2_ENCODE	3/994	0.807323	0.998965	0.865009	0.999761	0	0	CYB5A;IDH3G;PGD
ENCODE_and_ChEA_Consensus_TFs_from_ChIP-X_	B	TP53_CHEA	1/319	0.749858	0.998965	0.788697	0.999761	0	0	FITM2
ENCODE_and_ChEA_Consensus_TFs_from_ChIP-X_	B	SALL4_CHEA	1/355	0.786373	0.998965	0.822959	0.999761	0	0	SUCLG2
ENCODE_and_ChEA_Consensus_TFs_from_ChIP-X_	B	GATA2_CHEA	2/772	0.849792	0.998965	0.891638	0.999761	0	0	SLC35C1;PTPRF
ENCODE_and_ChEA_Consensus_TFs_from_ChIP-X_	B	TAF1_ENCODE	10/3346	0.927248	0.998965	0.974085	0.999761	1	0	HADHB;PSMB6;COPB2;SCO1;APMAP;MRPS11;NDUFV3;PGD;COX10;ARFGAP2
ENCODE_and_ChEA_Consensus_TFs_from_ChIP-X_	B	SP1_ENCODE	2/707	0.812697	0.998965	0.860108	0.999761	0	0	GCDH;PGD
ENCODE_and_ChEA_Consensus_TFs_from_ChIP-X_	B	ZNF384_ENCODE	2/730	0.82666	0.998965	0.872106	0.999761	0	0	PSMB6;PGD
ENCODE_and_ChEA_Consensus_TFs_from_ChIP-X_	B	SIX5_ENCODE	3/1094	0.856223	0.998965	0.904573	0.999761	0	0	PSMB6;ORMDL3;SLC29A2
ENCODE_and_ChEA_Consensus_TFs_from_ChIP-X_	B	SIN3A_ENCODE	3/1131	0.871406	0.998965	0.916377	0.999761	1	0	HADHB;GCDH;COX10
ENCODE_and_ChEA_Consensus_TFs_from_ChIP-X_	B	NFE2L2_CHEA	3/1022	0.822244	0.998965	0.877315	0.999761	0	0	RORB;PGD;TKT
ENCODE_and_ChEA_Consensus_TFs_from_ChIP-X_	B	CREB1_CHEA	5/1444	0.752844	0.998965	0.836219	0.999761	0	0	APMAP;ORMDL3;PNPLA3;ARFGAP2;NAP1L4
ENCODE_and_ChEA_Consensus_TFs_from_ChIP-X_	B	CREB1_ENCODE	7/2238	0.860215	0.998965	0.92776	0.999761	1	0	PSMB6;GCDH;APMAP;IDH3G;ORMDL3;NDUFV3;COX10
ENCODE_and_ChEA_Consensus_TFs_from_ChIP-X_	C	PPARG_CHEA	13/535	3.30411e-06	0.00029737	2.84479e-06	0.000256031	-2	22	RETSAT;ECH1;ADIPOQ;MGST1;LPL;FOS;CIDEC;LIPE;FAM83F;PC;GPD1;SLC29A4;PEMT
ENCODE_and_ChEA_Consensus_TFs_from_ChIP-X_	C	SUZ12_CHEA	18/1684	0.00202807	0.091263	0.00149911	0.0674599	-2	9	GDF10;SYCP1;RRAD;PDE3B;C4ORF19;WNT9B;LPL;SYN2;TRHDE;ADRA1A;AFF2;NPAS4;FAM83F;CDH20;PPP1R1B;MAPT;NAT8L;PITX3
ENCODE_and_ChEA_Consensus_TFs_from_ChIP-X_	C	EZH2_ENCODE	6/338	0.00772694	0.231808	0.00737815	0.221344	-2	8	SCGN;CPAMD8;WNT9B;C9ORF66;SLC2A4;TRHDE
ENCODE_and_ChEA_Consensus_TFs_from_ChIP-X_	C	REST_CHEA	12/1280	0.0296251	0.666566	0.0257549	0.579486	-2	5	NPAS4;SCGN;CPNE4;SLC30A5;TMEM126A;CIDEA;MYH14;FOSB;ABHD5;MAPT;SYN2;ADRA1A
ENCODE_and_ChEA_Consensus_TFs_from_ChIP-X_	C	NFIC_ENCODE	4/279	0.0545927	0.859991	0.0529057	0.801799	-2	5	EGR1;TRMT10A;ECH1;FOS
ENCODE_and_ChEA_Consensus_TFs_from_ChIP-X_	C	HDAC2_ENCODE	3/175	0.0603683	0.859991	0.0593624	0.801799	-2	5	NPAS4;TXNDC9;RTN4
ENCODE_and_ChEA_Consensus_TFs_from_ChIP-X_	C	SRF_ENCODE	4/299	0.0668882	0.859991	0.0647198	0.801799	-2	4	EGR1;ECH1;FOSB;FOS
ENCODE_and_ChEA_Consensus_TFs_from_ChIP-X_	C	SMC3_ENCODE	10/1181	0.0786928	0.885295	0.0712711	0.801799	-1	4	CNTFR;EGR1;EPB41L4B;RRAD;CPNE4;SH3KBP1;SLC30A5;SLC2A4;RTN4;TM7SF2
ENCODE_and_ChEA_Consensus_TFs_from_ChIP-X_	C	TRIM28_CHEA	3/210	0.092374	0.92374	0.0903815	0.903815	-1	3	EGR1;MAPT;TRHDE
ENCODE_and_ChEA_Consensus_TFs_from_ChIP-X_	C	CTCF_ENCODE	13/1790	0.122923	0.999844	0.109579	0.985616	-1	3	CNTFR;EGR1;TXNDC9;CPNE4;SH3KBP1;SLC30A5;SLC2A4;HAPLN3;RTN4;TM7SF2;HEBP2;EPB41L4B;MAPT
ENCODE_and_ChEA_Consensus_TFs_from_ChIP-X_	C	ESR1_CHEA	2/154	0.185464	0.999844	0.182713	0.985616	-1	2	MAPT;FOS
ENCODE_and_ChEA_Consensus_TFs_from_ChIP-X_	C	MYOD1_ENCODE	2/166	0.207661	0.999844	0.204393	0.985616	-1	2	USO1;SLC2A4
ENCODE_and_ChEA_Consensus_TFs_from_ChIP-X_	C	EGR1_CHEA	3/315	0.217231	0.999844	0.211618	0.985616	-1	2	EGR1;FAM83F;NAT8L
ENCODE_and_ChEA_Consensus_TFs_from_ChIP-X_	C	TAF7_ENCODE	5/640	0.228315	0.999844	0.218993	0.985616	-1	2	NPAS4;EGR1;SAR1B;UBA3;FOS
ENCODE_and_ChEA_Consensus_TFs_from_ChIP-X_	C	STAT3_CHEA	2/177	0.228244	0.999844	0.224511	0.985616	-1	2	FOS;RTN4
ENCODE_and_ChEA_Consensus_TFs_from_ChIP-X_	C	BCLAF1_ENCODE	6/851	0.267263	0.999844	0.25522	0.985616	-1	2	NPAS4;EGR1;TXNDC9;PCYT1A;SAR1B;PEMT
ENCODE_and_ChEA_Consensus_TFs_from_ChIP-X_	C	TCF3_ENCODE	6/840	0.257752	0.999844	0.245992	0.985616	-1	1	NPAS4;NANOS1;EGR1;TXNDC9;PC;USO1
ENCODE_and_ChEA_Consensus_TFs_from_ChIP-X_	C	NFE2L2_CHEA	7/1022	0.26591	0.999844	0.252416	0.985616	-1	1	PC;PRKAR2B;GPT2;PLEKHG6;LPL;ABHD5;ACACB
ENCODE_and_ChEA_Consensus_TFs_from_ChIP-X_	C	SALL4_CHEA	3/355	0.271583	0.999844	0.264636	0.985616	-1	1	SCGN;PDE3B;MCM10
ENCODE_and_ChEA_Consensus_TFs_from_ChIP-X_	C	REST_ENCODE	3/383	0.310508	0.999844	0.302712	0.985616	-1	1	NPAS4;SCGN;CPNE4
ENCODE_and_ChEA_Consensus_TFs_from_ChIP-X_	C	STAT3_ENCODE	5/725	0.311016	0.999844	0.299446	0.985616	-1	1	NPAS4;EGR1;RETSAT;FOS;RTN4
ENCODE_and_ChEA_Consensus_TFs_from_ChIP-X_	C	TP63_CHEA	9/1399	0.284032	0.999844	0.267144	0.985616	-1	1	EGR1;EPB41L4B;HCAR3;FAM83F;PLEKHG6;AGPAT2;ACACB;KCNJ1;GRAMD4
ENCODE_and_ChEA_Consensus_TFs_from_ChIP-X_	C	RAD21_ENCODE	8/1265	0.31722	0.999844	0.300821	0.985616	-1	1	CNTFR;EPB41L4B;SH3KBP1;SLC30A5;C4ORF19;MCM10;SLC2A4;TM7SF2
ENCODE_and_ChEA_Consensus_TFs_from_ChIP-X_	C	RFX5_ENCODE	4/559	0.318812	0.999844	0.308851	0.985616	-1	1	SLC30A5;FOSB;MCM10;FAM72D
ENCODE_and_ChEA_Consensus_TFs_from_ChIP-X_	C	NELFE_ENCODE	2/234	0.335564	0.999844	0.329669	0.985616	-1	1	EGR1;FOS
ENCODE_and_ChEA_Consensus_TFs_from_ChIP-X_	C	UBTF_ENCODE	10/1631	0.319405	0.999844	0.300124	0.985616	-1	1	NANOS1;EGR1;TXNDC9;PCYT1A;FAM89A;SH3KBP1;PRKAR2B;PDE3B;ABHD5;RTN4
ENCODE_and_ChEA_Consensus_TFs_from_ChIP-X_	C	RUNX1_CHEA	8/1294	0.339584	0.999844	0.322658	0.985616	-1	1	LIPE;EGR1;FAM83F;SH3KBP1;PDE3B;ABHD5;FOS;RTN4
ENCODE_and_ChEA_Consensus_TFs_from_ChIP-X_	C	TCF7L2_ENCODE	4/583	0.346648	0.999844	0.336124	0.985616	-1	1	HEBP2;UBA3;PEMT;SLC2A4
ENCODE_and_ChEA_Consensus_TFs_from_ChIP-X_	C	EZH2_CHEA	2/237	0.341144	0.999844	0.335151	0.985616	-1	1	PPP1R1B;NAT8L
ENCODE_and_ChEA_Consensus_TFs_from_ChIP-X_	C	SIN3A_ENCODE	7/1131	0.355242	0.999844	0.33949	0.985616	-1	1	NPAS4;TXNDC9;PC;GPAM;SAR1B;FOSB;MCM10
ENCODE_and_ChEA_Consensus_TFs_from_ChIP-X_	C	E2F6_ENCODE	18/3245	0.388278	0.999844	0.357135	0.993381	-1	0	NANOS1;TXNDC9;SAR1B;FBXO27;GPT2;PDE3B;ECH1;C4ORF19;C9ORF66;MCM10;ABHD5;SLC2A4;FOS;EPB41L4B;PC;ISOC1;MAPT;BOK
ENCODE_and_ChEA_Consensus_TFs_from_ChIP-X_	C	KLF4_CHEA	6/987	0.390059	0.999844	0.375277	0.993381	0	0	TXNDC9;FBXO27;NNAT;ECH1;MAPT;FOS
ENCODE_and_ChEA_Consensus_TFs_from_ChIP-X_	C	BCL3_ENCODE	2/273	0.406775	0.999844	0.399738	0.999836	0	0	NANOS1;TM7SF2
ENCODE_and_ChEA_Consensus_TFs_from_ChIP-X_	C	RCOR1_ENCODE	4/702	0.48308	0.999844	0.47073	0.999836	0	0	SAR1B;TMEM126A;FOS;TM7SF2
ENCODE_and_ChEA_Consensus_TFs_from_ChIP-X_	C	SIX5_ENCODE	6/1094	0.487641	0.999844	0.471878	0.999836	0	0	TRMT10A;TXNDC9;RETSAT;GPT2;ECH1;PEMT
ENCODE_and_ChEA_Consensus_TFs_from_ChIP-X_	C	TP53_CHEA	2/319	0.48583	0.999844	0.477844	0.999836	0	0	RRAD;ABHD5
ENCODE_and_ChEA_Consensus_TFs_from_ChIP-X_	C	BHLHE40_ENCODE	2/348	0.532258	0.999844	0.523888	0.999836	0	0	EPB41L4B;PC
ENCODE_and_ChEA_Consensus_TFs_from_ChIP-X_	C	USF2_ENCODE	5/965	0.550103	0.999844	0.535787	0.999836	0	0	PC;USO1;TMEM126A;RTN4;PITX3
ENCODE_and_ChEA_Consensus_TFs_from_ChIP-X_	C	SOX2_CHEA	4/775	0.561393	0.999844	0.548733	0.999836	0	0	GPT2;UBA3;FOS;TM7SF2
ENCODE_and_ChEA_Consensus_TFs_from_ChIP-X_	C	CBX3_ENCODE	1/81	0.339653	0.999844	0.337041	0.985616	0	0	NPAS4
ENCODE_and_ChEA_Consensus_TFs_from_ChIP-X_	C	TCF3_CHEA	5/1006	0.587594	0.999844	0.573376	0.999836	0	0	SH3KBP1;FBXO27;SLC19A3;CIDEA;RTN4
ENCODE_and_ChEA_Consensus_TFs_from_ChIP-X_	C	TRIM28_ENCODE	1/120	0.459577	0.999844	0.455181	0.999836	0	0	NPAS4
ENCODE_and_ChEA_Consensus_TFs_from_ChIP-X_	C	GATA1_CHEA	4/807	0.593696	0.999844	0.581077	0.999836	0	0	ALDH2;PRKAR2B;FOS;RTN4
ENCODE_and_ChEA_Consensus_TFs_from_ChIP-X_	C	ELF1_ENCODE	3/2483	0.999844	0.999844	0.999836	0.999836	2	0	TRMT10A;PCYT1A;RETSAT
ENCODE_and_ChEA_Consensus_TFs_from_ChIP-X_	C	YY1_ENCODE	6/2753	0.996691	0.999844	0.996485	0.999836	2	0	SAR1B;ECH1;UBA3;TMEM126A;MCM10;ABHD5
ENCODE_and_ChEA_Consensus_TFs_from_ChIP-X_	C	BRCA1_ENCODE	8/3218	0.995474	0.999844	0.995242	0.999836	2	0	EGR1;TXNDC9;SAR1B;SLC30A5;USO1;FOSB;ABHD5;FOS
ENCODE_and_ChEA_Consensus_TFs_from_ChIP-X_	C	TAF1_ENCODE	9/3346	0.992737	0.999844	0.992351	0.999836	2	0	TXNDC9;PCYT1A;RETSAT;SAR1B;USO1;UBA3;TMEM126A;FOS;RTN4
ENCODE_and_ChEA_Consensus_TFs_from_ChIP-X_	C	FOS_ENCODE	3/637	0.634956	0.999844	0.624216	0.999836	0	0	PC;FAM72D;RTN4
ENCODE_and_ChEA_Consensus_TFs_from_ChIP-X_	C	GABPA_ENCODE	5/2082	0.984974	0.999844	0.983815	0.999836	1	0	TRMT10A;TXNDC9;PCYT1A;SAR1B;PEMT
ENCODE_and_ChEA_Consensus_TFs_from_ChIP-X_	C	HNF4A_ENCODE	6/1276	0.639854	0.999844	0.624733	0.999836	0	0	ALDH1L1;PLEKHG6;MARC1;WNT9B;ISOC1;PLIN1
ENCODE_and_ChEA_Consensus_TFs_from_ChIP-X_	C	SPI1_CHEA	5/1056	0.630994	0.999844	0.617082	0.999836	0	0	SCGN;TRMT10A;PCYT1A;FOS;RTN4
ENCODE_and_ChEA_Consensus_TFs_from_ChIP-X_	C	ZBTB33_ENCODE	1/702	0.974111	0.999844	0.972575	0.999836	1	0	TXNDC9
ENCODE_and_ChEA_Consensus_TFs_from_ChIP-X_	C	E2F4_ENCODE	1/710	0.975186	0.999844	0.973701	0.999836	1	0	MCM10
ENCODE_and_ChEA_Consensus_TFs_from_ChIP-X_	C	CREB1_CHEA	7/1444	0.610753	0.999844	0.594027	0.999836	0	0	EGR1;TXNDC9;PCYT1A;PC;GPAM;FOSB;FOS
ENCODE_and_ChEA_Consensus_TFs_from_ChIP-X_	C	PML_ENCODE	4/1596	0.967078	0.999844	0.964655	0.999836	1	0	PCYT1A;GPAM;SAR1B;FOS
ENCODE_and_ChEA_Consensus_TFs_from_ChIP-X_	C	FLI1_ENCODE	1/650	0.96591	0.999844	0.964011	0.999836	1	0	TMEM126A
ENCODE_and_ChEA_Consensus_TFs_from_ChIP-X_	C	SPI1_ENCODE	4/1540	0.959427	0.999844	0.956513	0.999836	1	0	HEBP2;SLC30A5;AGPAT2;RTN4
ENCODE_and_ChEA_Consensus_TFs_from_ChIP-X_	C	MYC_CHEA	1/573	0.94883	0.999844	0.946274	0.999836	1	0	TRMT10A
ENCODE_and_ChEA_Consensus_TFs_from_ChIP-X_	C	EGR1_ENCODE	1/537	0.938164	0.999844	0.93525	0.999836	1	0	BOK
ENCODE_and_ChEA_Consensus_TFs_from_ChIP-X_	C	IRF8_CHEA	1/121	0.46235	0.999844	0.457919	0.999836	0	0	USO1
ENCODE_and_ChEA_Consensus_TFs_from_ChIP-X_	C	NFYA_ENCODE	7/2250	0.949501	0.999844	0.945717	0.999836	1	0	NANOS1;PC;TMEM126A;FOSB;MCM10;RTN4;TM7SF2
ENCODE_and_ChEA_Consensus_TFs_from_ChIP-X_	C	E2F1_CHEA	2/859	0.937104	0.999844	0.933524	0.999836	1	0	NPAS4;MGST1
ENCODE_and_ChEA_Consensus_TFs_from_ChIP-X_	C	CHD1_ENCODE	3/655	0.653724	0.999844	0.643075	0.999836	0	0	TRMT10A;SLC30A5;FOS
ENCODE_and_ChEA_Consensus_TFs_from_ChIP-X_	C	FOSL2_ENCODE	1/196	0.634719	0.999844	0.628861	0.999836	0	0	RTN4
ENCODE_and_ChEA_Consensus_TFs_from_ChIP-X_	C	CEBPD_ENCODE	2/734	0.892805	0.999844	0.887613	0.999836	1	0	ABHD5;FOS
ENCODE_and_ChEA_Consensus_TFs_from_ChIP-X_	C	MAX_ENCODE	7/2073	0.914575	0.999844	0.908465	0.999836	1	0	NPAS4;EPB41L4B;TXNDC9;PC;SLC30A5;USO1;SLC2A4
ENCODE_and_ChEA_Consensus_TFs_from_ChIP-X_	C	SMAD4_CHEA	2/584	0.802781	0.999844	0.795458	0.999836	0	0	EPB41L4B;FAM83F
ENCODE_and_ChEA_Consensus_TFs_from_ChIP-X_	C	PBX3_ENCODE	4/1269	0.894604	0.999844	0.888275	0.999836	1	0	TRMT10A;PCYT1A;PC;RTN4
ENCODE_and_ChEA_Consensus_TFs_from_ChIP-X_	C	ZNF384_ENCODE	3/730	0.724525	0.999844	0.714539	0.999836	0	0	SH3KBP1;SLC30A5;ECH1
ENCODE_and_ChEA_Consensus_TFs_from_ChIP-X_	C	IRF3_ENCODE	2/663	0.856287	0.999844	0.850076	0.999836	1	0	FAM72D;RTN4
ENCODE_and_ChEA_Consensus_TFs_from_ChIP-X_	C	SP2_ENCODE	3/994	0.887917	0.999844	0.881843	0.999836	1	0	PC;MYH14;RTN4
ENCODE_and_ChEA_Consensus_TFs_from_ChIP-X_	C	SP1_ENCODE	2/707	0.880055	0.999844	0.874479	0.999836	1	0	PC;RTN4
ENCODE_and_ChEA_Consensus_TFs_from_ChIP-X_	C	ZMIZ1_ENCODE	4/914	0.691073	0.999844	0.679225	0.999836	0	0	EGR1;RETSAT;TMEM126A;ABHD5
ENCODE_and_ChEA_Consensus_TFs_from_ChIP-X_	C	USF1_ENCODE	5/1423	0.859537	0.999844	0.851212	0.999836	1	0	EPB41L4B;PC;PRKAR2B;USO1;PITX3
ENCODE_and_ChEA_Consensus_TFs_from_ChIP-X_	C	ZBTB7A_ENCODE	8/2184	0.880495	0.999844	0.872123	0.999836	1	0	HEBP2;EGR1;ALDH2;SH3KBP1;PDE3B;SLC29A4;SLC2A4;RTN4
ENCODE_and_ChEA_Consensus_TFs_from_ChIP-X_	C	AR_CHEA	5/1095	0.662909	0.999844	0.64936	0.999836	0	0	HEBP2;EPB41L4B;CPAMD8;MCM10;RTN4
ENCODE_and_ChEA_Consensus_TFs_from_ChIP-X_	C	MYC_ENCODE	7/1515	0.661566	0.999844	0.645636	0.999836	0	0	TXNDC9;PC;SLC30A5;USO1;PEMT;SLC2A4;RTN4
ENCODE_and_ChEA_Consensus_TFs_from_ChIP-X_	C	NRF1_ENCODE	7/1882	0.855981	0.999844	0.846594	0.999836	1	0	TXNDC9;RETSAT;SLC30A5;USO1;FOSB;ABHD5;MAPT
ENCODE_and_ChEA_Consensus_TFs_from_ChIP-X_	C	KAT2A_ENCODE	1/90	0.369476	0.999844	0.366369	0.993381	0	0	EGR1
ENCODE_and_ChEA_Consensus_TFs_from_ChIP-X_	C	ZC3H11A_ENCODE	1/129	0.484031	0.999844	0.479342	0.999836	0	0	TRMT10A
ENCODE_and_ChEA_Consensus_TFs_from_ChIP-X_	C	NANOG_CHEA	2/595	0.811157	0.999844	0.803982	0.999836	1	0	PPP1R1A;FBXO27
ENCODE_and_ChEA_Consensus_TFs_from_ChIP-X_	C	CREB1_ENCODE	8/2238	0.896239	0.999844	0.888818	0.999836	1	0	EGR1;TRMT10A;SLC30A5;TMEM126A;FOSB;PEMT;MCM10;FOS
ENCODE_and_ChEA_Consensus_TFs_from_ChIP-X_	C	GATA2_CHEA	3/772	0.759038	0.999844	0.749572	0.999836	0	0	ABHD5;FOS;GRAMD4
ENCODE_and_ChEA_Consensus_TFs_from_ChIP-X_	C	ATF2_ENCODE	12/2852	0.804127	0.999844	0.790047	0.999836	1	0	NPAS4;EGR1;TRMT10A;PCYT1A;RETSAT;SAR1B;USO1;TMEM126A;FOSB;PEMT;MCM10;FOS
ENCODE_and_ChEA_Consensus_TFs_from_ChIP-X_	C	YY1_CHEA	1/332	0.819455	0.999844	0.81416	0.999836	1	0	ECH1
ENCODE_and_ChEA_Consensus_TFs_from_ChIP-X_	C	FOXA1_ENCODE	1/205	0.65131	0.999844	0.645399	0.999836	0	0	FOS
ENCODE_and_ChEA_Consensus_TFs_from_ChIP-X_	C	NFYB_ENCODE	16/3715	0.808936	0.999844	0.793941	0.999836	1	0	NANOS1;TRMT10A;TXNDC9;PCYT1A;RETSAT;CXORF65;USO1;MCM10;SLC2A4;RTN4;TM7SF2;PC;ALDH2;TMEM126A;FOSB;FAM72D
ENCODE_and_ChEA_Consensus_TFs_from_ChIP-X_	C	STAT5A_ENCODE	1/233	0.6983	0.999844	0.692338	0.999836	0	0	EGR1
ENCODE_and_ChEA_Consensus_TFs_from_ChIP-X_	C	IRF1_ENCODE	1/263	0.741702	0.999844	0.735832	0.999836	1	0	TXNDC9
ENCODE_and_ChEA_Consensus_TFs_from_ChIP-X_	C	POU5F1_CHEA	1/261	0.739011	0.999844	0.733132	0.999836	1	0	SLC19A3
ENCODE_and_ChEA_Consensus_TFs_from_ChIP-X_	D	STAT3_CHEA	1/177	0.15547	0.946313	0.168034	0.960773	-2	3	ESRP2
ENCODE_and_ChEA_Consensus_TFs_from_ChIP-X_	D	FOXA1_ENCODE	1/205	0.177859	0.946313	0.191921	0.960773	-2	3	ESRP2
ENCODE_and_ChEA_Consensus_TFs_from_ChIP-X_	D	SUZ12_CHEA	3/1684	0.211671	0.946313	0.246855	0.960773	-1	2	ADAM12;RASGRF1;SPSB4
ENCODE_and_ChEA_Consensus_TFs_from_ChIP-X_	D	KLF4_CHEA	2/987	0.240629	0.946313	0.270105	0.960773	-2	2	ESRP2;PTCH2
ENCODE_and_ChEA_Consensus_TFs_from_ChIP-X_	D	FOXA2_ENCODE	1/316	0.261205	0.946313	0.280433	0.960773	-2	2	HAVCR1
ENCODE_and_ChEA_Consensus_TFs_from_ChIP-X_	D	NRF1_ENCODE	3/1882	0.262982	0.946313	0.304457	0.960773	-1	2	AVEN;COQ2;EDEM2
ENCODE_and_ChEA_Consensus_TFs_from_ChIP-X_	D	TP53_CHEA	1/319	0.263342	0.946313	0.282694	0.960773	-1	2	ZNF365
ENCODE_and_ChEA_Consensus_TFs_from_ChIP-X_	D	NR2C2_ENCODE	1/350	0.285088	0.946313	0.305671	0.960773	-1	2	AGPS
ENCODE_and_ChEA_Consensus_TFs_from_ChIP-X_	D	AR_CHEA	2/1095	0.279371	0.946313	0.312327	0.960773	-1	2	RASGRF1;ZNF365
ENCODE_and_ChEA_Consensus_TFs_from_ChIP-X_	D	HNF4A_ENCODE	2/1276	0.344258	0.946313	0.382336	0.960773	-1	2	AMN;ESRP2
ENCODE_and_ChEA_Consensus_TFs_from_ChIP-X_	D	REST_CHEA	2/1280	0.345681	0.946313	0.383861	0.960773	-1	1	CRTAC1;ADAM12
ENCODE_and_ChEA_Consensus_TFs_from_ChIP-X_	D	PPARG_CHEA	1/535	0.402742	0.946313	0.42907	0.960773	-1	1	COQ2
ENCODE_and_ChEA_Consensus_TFs_from_ChIP-X_	D	RFX5_ENCODE	1/559	0.416586	0.946313	0.443479	0.960773	-1	1	ZNF365
ENCODE_and_ChEA_Consensus_TFs_from_ChIP-X_	D	MYC_CHEA	1/573	0.424521	0.946313	0.451726	0.960773	-1	1	FOXRED1
ENCODE_and_ChEA_Consensus_TFs_from_ChIP-X_	D	SMAD4_CHEA	1/584	0.430683	0.946313	0.458125	0.960773	-1	1	AGPS
ENCODE_and_ChEA_Consensus_TFs_from_ChIP-X_	D	SP1_ENCODE	1/707	0.495467	0.946313	0.525071	0.960773	-1	1	FOXRED1
ENCODE_and_ChEA_Consensus_TFs_from_ChIP-X_	D	ZMIZ1_ENCODE	1/914	0.589006	0.946313	0.620537	0.960773	-1	1	FOXRED1
ENCODE_and_ChEA_Consensus_TFs_from_ChIP-X_	D	BRCA1_ENCODE	3/3218	0.610057	0.946313	0.672743	0.960773	-1	1	COQ2;MEST;FOXRED1
ENCODE_and_ChEA_Consensus_TFs_from_ChIP-X_	D	E2F6_ENCODE	3/3245	0.616168	0.946313	0.678837	0.960773	-1	0	AVEN;AGPS;MEST
ENCODE_and_ChEA_Consensus_TFs_from_ChIP-X_	D	TCF3_CHEA	1/1006	0.625074	0.946313	0.656908	0.960773	-1	0	COQ2
ENCODE_and_ChEA_Consensus_TFs_from_ChIP-X_	D	NFE2L2_CHEA	1/1022	0.631032	0.946313	0.662889	0.960773	-1	0	ZNF365
ENCODE_and_ChEA_Consensus_TFs_from_ChIP-X_	D	SPI1_CHEA	1/1056	0.643397	0.946313	0.675277	0.960773	-1	0	AGPS
ENCODE_and_ChEA_Consensus_TFs_from_ChIP-X_	D	SIX5_ENCODE	1/1094	0.656752	0.946313	0.688616	0.960773	-1	0	EDEM2
ENCODE_and_ChEA_Consensus_TFs_from_ChIP-X_	D	SMC3_ENCODE	1/1181	0.685565	0.946313	0.717247	0.960773	-1	0	RBM46
ENCODE_and_ChEA_Consensus_TFs_from_ChIP-X_	D	RAD21_ENCODE	1/1265	0.711198	0.946313	0.742533	0.960773	-1	0	RBM46
ENCODE_and_ChEA_Consensus_TFs_from_ChIP-X_	D	ELF1_ENCODE	2/2483	0.702581	0.946313	0.749845	0.960773	-1	0	EDEM2;FOXRED1
ENCODE_and_ChEA_Consensus_TFs_from_ChIP-X_	D	RUNX1_CHEA	1/1294	0.719579	0.946313	0.750759	0.960773	-1	0	ESRP2
ENCODE_and_ChEA_Consensus_TFs_from_ChIP-X_	D	USF1_ENCODE	1/1423	0.754144	0.946313	0.784452	0.960773	-1	0	FOXRED1
ENCODE_and_ChEA_Consensus_TFs_from_ChIP-X_	D	CREB1_CHEA	1/1444	0.759373	0.946313	0.789515	0.960773	-1	0	FOXRED1
ENCODE_and_ChEA_Consensus_TFs_from_ChIP-X_	D	UBTF_ENCODE	1/1631	0.801516	0.946313	0.829935	0.960773	-1	0	AVEN
ENCODE_and_ChEA_Consensus_TFs_from_ChIP-X_	D	CTCF_ENCODE	1/1790	0.83175	0.946313	0.858455	0.960773	-1	0	ADAM12
ENCODE_and_ChEA_Consensus_TFs_from_ChIP-X_	D	GABPA_ENCODE	1/2082	0.876263	0.946313	0.899524	0.960773	-1	0	FOXRED1
ENCODE_and_ChEA_Consensus_TFs_from_ChIP-X_	D	CREB1_ENCODE	1/2238	0.895213	0.946313	0.916589	0.960773	-1	0	FOXRED1
ENCODE_and_ChEA_Consensus_TFs_from_ChIP-X_	D	NFYB_ENCODE	2/3715	0.892596	0.946313	0.923382	0.960773	0	0	AGPS;FOXRED1
ENCODE_and_ChEA_Consensus_TFs_from_ChIP-X_	D	NFYA_ENCODE	1/2250	0.896551	0.946313	0.917782	0.960773	0	0	FOXRED1
ENCODE_and_ChEA_Consensus_TFs_from_ChIP-X_	D	YY1_ENCODE	1/2753	0.940104	0.946313	0.955591	0.960773	0	0	AGPS
ENCODE_and_ChEA_Consensus_TFs_from_ChIP-X_	D	ATF2_ENCODE	1/2852	0.946313	0.946313	0.960773	0.960773	0	0	COQ2
ENCODE_and_ChEA_Consensus_TFs_from_ChIP-X_	E	FOXM1_ENCODE	1/95	0.0821674	0.861832	0.0482848	0.615236	-2	5	CENPA
ENCODE_and_ChEA_Consensus_TFs_from_ChIP-X_	E	SP1_ENCODE	2/707	0.131651	0.861832	0.0483023	0.615236	-2	4	CYP1A1;CENPA
ENCODE_and_ChEA_Consensus_TFs_from_ChIP-X_	E	POU5F1_CHEA	1/261	0.210652	0.861832	0.126978	0.615236	-2	3	GJB3
ENCODE_and_ChEA_Consensus_TFs_from_ChIP-X_	E	TCF3_CHEA	2/1006	0.228474	0.861832	0.0903665	0.615236	-2	2	GABRP;GJB3
ENCODE_and_ChEA_Consensus_TFs_from_ChIP-X_	E	EZH2_ENCODE	1/338	0.264299	0.861832	0.161504	0.615236	-2	2	CYP1A1
ENCODE_and_ChEA_Consensus_TFs_from_ChIP-X_	E	TP63_CHEA	2/1399	0.361941	0.861832	0.15759	0.615236	-1	1	TACSTD2;CENPA
ENCODE_and_ChEA_Consensus_TFs_from_ChIP-X_	E	TCF7L2_ENCODE	1/583	0.412999	0.861832	0.263545	0.615236	-2	1	CLASP2
ENCODE_and_ChEA_Consensus_TFs_from_ChIP-X_	E	NANOG_CHEA	1/595	0.419498	0.861832	0.26825	0.615236	-1	1	GJB3
ENCODE_and_ChEA_Consensus_TFs_from_ChIP-X_	E	FOS_ENCODE	1/637	0.441712	0.861832	0.284513	0.615236	-2	1	CENPA
ENCODE_and_ChEA_Consensus_TFs_from_ChIP-X_	E	IRF3_ENCODE	1/663	0.455059	0.861832	0.294422	0.615236	-1	1	CENPA
ENCODE_and_ChEA_Consensus_TFs_from_ChIP-X_	E	SOX2_CHEA	1/775	0.509182	0.861832	0.335745	0.615236	-1	1	GJB3
ENCODE_and_ChEA_Consensus_TFs_from_ChIP-X_	E	ZMIZ1_ENCODE	1/914	0.569305	0.861832	0.384073	0.615236	-1	1	CENPA
ENCODE_and_ChEA_Consensus_TFs_from_ChIP-X_	E	SP2_ENCODE	1/994	0.600682	0.861832	0.41047	0.615236	-1	1	CENPA
ENCODE_and_ChEA_Consensus_TFs_from_ChIP-X_	E	ZBTB7A_ENCODE	2/2184	0.600092	0.861832	0.312364	0.615236	-1	1	FGFR4;CLASP2
ENCODE_and_ChEA_Consensus_TFs_from_ChIP-X_	E	CREB1_ENCODE	2/2238	0.61411	0.861832	0.323369	0.615236	-1	1	CENPA;CLASP2
ENCODE_and_ChEA_Consensus_TFs_from_ChIP-X_	E	NFE2L2_CHEA	1/1022	0.611144	0.861832	0.419471	0.615236	-1	1	GABRP
ENCODE_and_ChEA_Consensus_TFs_from_ChIP-X_	E	AR_CHEA	1/1095	0.637216	0.861832	0.442377	0.615236	-1	0	CYP1A1
ENCODE_and_ChEA_Consensus_TFs_from_ChIP-X_	E	SMC3_ENCODE	1/1181	0.665813	0.861832	0.468344	0.615236	-1	0	CLASP2
ENCODE_and_ChEA_Consensus_TFs_from_ChIP-X_	E	PBX3_ENCODE	1/1269	0.692863	0.861832	0.493814	0.615236	-1	0	CENPA
ENCODE_and_ChEA_Consensus_TFs_from_ChIP-X_	E	HNF4A_ENCODE	1/1276	0.694923	0.861832	0.495793	0.615236	-1	0	FGFR4
ENCODE_and_ChEA_Consensus_TFs_from_ChIP-X_	E	REST_CHEA	1/1280	0.696095	0.861832	0.496922	0.615236	-1	0	DCSTAMP
ENCODE_and_ChEA_Consensus_TFs_from_ChIP-X_	E	SUZ12_CHEA	1/1684	0.794834	0.939349	0.600089	0.683081	-1	0	TACSTD2
ENCODE_and_ChEA_Consensus_TFs_from_ChIP-X_	E	NFYB_ENCODE	2/3715	0.873716	0.957043	0.604264	0.683081	-1	0	CENPA;CLASP2
ENCODE_and_ChEA_Consensus_TFs_from_ChIP-X_	E	NFYA_ENCODE	1/2250	0.883424	0.957043	0.713363	0.77281	-1	0	CENPA
ENCODE_and_ChEA_Consensus_TFs_from_ChIP-X_	E	BRCA1_ENCODE	1/3218	0.957537	0.958751	0.843287	0.846008	-1	0	CLASP2
ENCODE_and_ChEA_Consensus_TFs_from_ChIP-X_	E	E2F6_ENCODE	1/3245	0.958751	0.958751	0.846008	0.846008	-1	0	CENPA
ENCODE_and_ChEA_Consensus_TFs_from_ChIP-X_	F	MYOD1_ENCODE	2/166	0.0558765	0.999782	0.0437535	0.999446	-2	5	CHRNA1;KLHL31
ENCODE_and_ChEA_Consensus_TFs_from_ChIP-X_	F	SUZ12_CHEA	7/1684	0.0884357	0.999782	0.0446084	0.999446	-2	4	MESP1;DLX3;C1ORF115;CADM2;PTGER3;CA4;MDFI
ENCODE_and_ChEA_Consensus_TFs_from_ChIP-X_	F	PPARD_CHEA	2/285	0.139499	0.999782	0.110859	0.999446	-2	3	TSPAN14;CAT
ENCODE_and_ChEA_Consensus_TFs_from_ChIP-X_	F	RUNX1_CHEA	5/1294	0.174679	0.999782	0.111064	0.999446	-2	3	MICAL1;PTGER3;FFAR2;AOAH;CSAD
ENCODE_and_ChEA_Consensus_TFs_from_ChIP-X_	F	SUZ12_ENCODE	1/105	0.215265	0.999782	0.19076	0.999446	-1	2	DLX3
ENCODE_and_ChEA_Consensus_TFs_from_ChIP-X_	F	TP63_CHEA	5/1399	0.217113	0.999782	0.141623	0.999446	-1	2	COL7A1;TTC7B;LRP5;MDFI;KLHL31
ENCODE_and_ChEA_Consensus_TFs_from_ChIP-X_	F	ZC3H11A_ENCODE	1/129	0.257697	0.999782	0.228782	0.999446	-1	2	PTGER3
ENCODE_and_ChEA_Consensus_TFs_from_ChIP-X_	F	FOXP2_ENCODE	1/178	0.337476	0.999782	0.301116	0.999446	-2	2	CSAD
ENCODE_and_ChEA_Consensus_TFs_from_ChIP-X_	F	HNF4A_ENCODE	4/1276	0.337557	0.999782	0.247459	0.999446	-1	2	BPIFB2;ENTPD2;C1ORF115;CTGF
ENCODE_and_ChEA_Consensus_TFs_from_ChIP-X_	F	TRIM28_CHEA	1/210	0.384982	0.999782	0.344762	0.999446	-1	1	CDKN2B
ENCODE_and_ChEA_Consensus_TFs_from_ChIP-X_	F	SMAD4_CHEA	2/584	0.390307	0.999782	0.325859	0.999446	-1	1	TTC7B;AOAH
ENCODE_and_ChEA_Consensus_TFs_from_ChIP-X_	F	TCF3_CHEA	3/1006	0.409818	0.999782	0.324876	0.999446	-1	1	MESP1;GNG2;CTGF
ENCODE_and_ChEA_Consensus_TFs_from_ChIP-X_	F	EZH2_CHEA	1/237	0.42246	0.999782	0.379526	0.999446	-1	1	PTGER3
ENCODE_and_ChEA_Consensus_TFs_from_ChIP-X_	F	NFE2L2_CHEA	3/1022	0.419825	0.999782	0.33379	0.999446	-1	1	CDKN2B;C3ORF80;CAT
ENCODE_and_ChEA_Consensus_TFs_from_ChIP-X_	F	FOXA2_ENCODE	1/316	0.519744	0.999782	0.471299	0.999446	-1	1	LRP5
ENCODE_and_ChEA_Consensus_TFs_from_ChIP-X_	F	SMC3_ENCODE	3/1181	0.515872	0.999782	0.4219	0.999446	-1	1	MESP1;CEACAM1;DLX3
ENCODE_and_ChEA_Consensus_TFs_from_ChIP-X_	F	SALL4_CHEA	1/355	0.561664	0.999782	0.511617	0.999446	-1	1	CTGF
ENCODE_and_ChEA_Consensus_TFs_from_ChIP-X_	F	CTCF_ENCODE	4/1790	0.599246	0.999782	0.485143	0.999446	-1	1	MESP1;CDKN2B;CEACAM1;DLX3
ENCODE_and_ChEA_Consensus_TFs_from_ChIP-X_	F	RELA_ENCODE	1/484	0.676377	0.999782	0.624872	0.999446	-1	0	PLA1A
ENCODE_and_ChEA_Consensus_TFs_from_ChIP-X_	F	EGR1_ENCODE	1/537	0.714472	0.999782	0.663628	0.999446	-1	0	CSAD
ENCODE_and_ChEA_Consensus_TFs_from_ChIP-X_	F	SPI1_ENCODE	3/1540	0.698373	0.999782	0.604216	0.999446	-1	0	CCL22;MICAL1;DPEP2
ENCODE_and_ChEA_Consensus_TFs_from_ChIP-X_	F	AR_CHEA	2/1095	0.725466	0.999782	0.651628	0.999446	-1	0	LEP;AOAH
ENCODE_and_ChEA_Consensus_TFs_from_ChIP-X_	F	NANOG_CHEA	1/595	0.751138	0.999782	0.701599	0.999446	-1	0	CTGF
ENCODE_and_ChEA_Consensus_TFs_from_ChIP-X_	F	FOS_ENCODE	1/637	0.774773	0.999782	0.72647	0.999446	-1	0	MARCH2
ENCODE_and_ChEA_Consensus_TFs_from_ChIP-X_	F	IRF3_ENCODE	1/663	0.788287	0.999782	0.740847	0.999446	-1	0	MARCH2
ENCODE_and_ChEA_Consensus_TFs_from_ChIP-X_	F	RAD21_ENCODE	2/1265	0.797057	0.999782	0.72983	0.999446	-1	0	CEACAM1;DLX3
ENCODE_and_ChEA_Consensus_TFs_from_ChIP-X_	F	RCOR1_ENCODE	1/702	0.807084	0.999782	0.761052	0.999446	-1	0	TSPAN14
ENCODE_and_ChEA_Consensus_TFs_from_ChIP-X_	F	CEBPD_ENCODE	1/734	0.82128	0.999782	0.776484	0.999446	-1	0	CAT
ENCODE_and_ChEA_Consensus_TFs_from_ChIP-X_	F	GATA2_CHEA	1/772	0.836813	0.999782	0.793558	0.999446	-1	0	C8ORF76
ENCODE_and_ChEA_Consensus_TFs_from_ChIP-X_	F	SOX2_CHEA	1/775	0.837981	0.999782	0.794851	0.999446	-1	0	CTGF
ENCODE_and_ChEA_Consensus_TFs_from_ChIP-X_	F	TCF3_ENCODE	1/840	0.86138	0.999782	0.821014	0.999446	-1	0	MICAL1
ENCODE_and_ChEA_Consensus_TFs_from_ChIP-X_	F	ZMIZ1_ENCODE	1/914	0.884008	0.999782	0.846875	0.999446	-1	0	CAT
ENCODE_and_ChEA_Consensus_TFs_from_ChIP-X_	F	UBTF_ENCODE	2/1631	0.898691	0.999782	0.85035	0.999446	0	0	TSPAN14;TTC7B
ENCODE_and_ChEA_Consensus_TFs_from_ChIP-X_	F	SP2_ENCODE	1/994	0.904409	0.999782	0.870762	0.999446	-1	0	MARCH2
ENCODE_and_ChEA_Consensus_TFs_from_ChIP-X_	F	NFYA_ENCODE	3/2250	0.90341	0.999782	0.845731	0.999446	0	0	MARCH2;CADM2;CAT
ENCODE_and_ChEA_Consensus_TFs_from_ChIP-X_	F	SIX5_ENCODE	1/1094	0.925028	0.999782	0.895588	0.999446	0	0	C8ORF76
ENCODE_and_ChEA_Consensus_TFs_from_ChIP-X_	F	SPI1_CHEA	1/1056	0.917764	0.999782	0.886752	0.999446	0	0	GNG2
ENCODE_and_ChEA_Consensus_TFs_from_ChIP-X_	F	NRF1_ENCODE	2/1882	0.9389	0.999782	0.903093	0.999446	0	0	MESP1;CSAD
ENCODE_and_ChEA_Consensus_TFs_from_ChIP-X_	F	PBX3_ENCODE	1/1269	0.951146	0.999782	0.928372	0.999446	0	0	MARCH2
ENCODE_and_ChEA_Consensus_TFs_from_ChIP-X_	F	REST_CHEA	1/1280	0.95245	0.999782	0.930059	0.999446	0	0	CA4
ENCODE_and_ChEA_Consensus_TFs_from_ChIP-X_	F	GABPA_ENCODE	2/2082	0.959758	0.999782	0.932485	0.999446	0	0	CSAD;C8ORF76
ENCODE_and_ChEA_Consensus_TFs_from_ChIP-X_	F	ZBTB7A_ENCODE	2/2184	0.967628	0.999782	0.944122	0.999446	0	0	DLX3;CSAD
ENCODE_and_ChEA_Consensus_TFs_from_ChIP-X_	F	PML_ENCODE	1/1596	0.978291	0.999782	0.96502	0.999446	0	0	C8ORF76
ENCODE_and_ChEA_Consensus_TFs_from_ChIP-X_	F	NFYB_ENCODE	4/3715	0.980823	0.999782	0.958414	0.999446	0	0	MARCH2;CADM2;CAT;DPEP2
ENCODE_and_ChEA_Consensus_TFs_from_ChIP-X_	F	E2F6_ENCODE	3/3245	0.985918	0.999782	0.970479	0.999446	0	0	MESP1;C3ORF80;CSAD
ENCODE_and_ChEA_Consensus_TFs_from_ChIP-X_	F	BRCA1_ENCODE	2/3218	0.99695	0.999782	0.993066	0.999446	0	0	CSAD;CTGF
ENCODE_and_ChEA_Consensus_TFs_from_ChIP-X_	F	ELF1_ENCODE	1/2483	0.997769	0.999782	0.995415	0.999446	0	0	C8ORF76
ENCODE_and_ChEA_Consensus_TFs_from_ChIP-X_	F	TAF1_ENCODE	1/3346	0.999782	0.999782	0.999446	0.999446	0	0	CSAD
ENCODE_and_ChEA_Consensus_TFs_from_ChIP-X_	F	YY1_ENCODE	1/2753	0.998909	0.999782	0.997596	0.999446	0	0	CSAD
ENCODE_and_ChEA_Consensus_TFs_from_ChIP-X_	G	FOXM1_ENCODE	3/95	0.00173112	0.098674	0.00160015	0.0912084	-2	12	NEK2;KIF20A;CEP55
ENCODE_and_ChEA_Consensus_TFs_from_ChIP-X_	G	E2F4_ENCODE	6/710	0.00825091	0.235151	0.00630418	0.166702	-2	8	CENPM;NEK2;KIF20A;AURKB;SKA1;CEP55
ENCODE_and_ChEA_Consensus_TFs_from_ChIP-X_	G	SPI1_ENCODE	9/1540	0.0131215	0.249309	0.00877379	0.166702	-2	7	TYROBP;PARVG;CXCR3;TBC1D10C;CLECL1;SLC6A12;PRAME;ITGAL;CEP55
ENCODE_and_ChEA_Consensus_TFs_from_ChIP-X_	G	TCF3_CHEA	5/1006	0.105346	0.999548	0.0885677	0.999438	-2	4	CLDN4;MCF2;STMN2;CENPM;ADAMTS6
ENCODE_and_ChEA_Consensus_TFs_from_ChIP-X_	G	POU5F1_CHEA	2/261	0.138534	0.999548	0.128563	0.999438	-2	3	CLDN4;STMN2
ENCODE_and_ChEA_Consensus_TFs_from_ChIP-X_	G	PPARD_CHEA	2/285	0.159297	0.999548	0.147962	0.999438	-2	3	ST14;VCAM1
ENCODE_and_ChEA_Consensus_TFs_from_ChIP-X_	G	SMAD4_CHEA	3/584	0.178985	0.999548	0.161593	0.999438	-2	3	KCNF1;RASL11B;CEP55
ENCODE_and_ChEA_Consensus_TFs_from_ChIP-X_	G	KLF4_CHEA	4/987	0.232391	0.999548	0.206281	0.999438	-1	2	CLDN4;ST14;STMN2;NEK2
ENCODE_and_ChEA_Consensus_TFs_from_ChIP-X_	G	NFE2L2_CHEA	4/1022	0.251494	0.999548	0.223944	0.999438	-1	2	KCNF1;CLDN4;HTR7;RASL11B
ENCODE_and_ChEA_Consensus_TFs_from_ChIP-X_	G	SPI1_CHEA	4/1056	0.270384	0.999548	0.2415	0.999438	-1	2	TYROBP;TBC1D10C;SLAMF6;ITGAL
ENCODE_and_ChEA_Consensus_TFs_from_ChIP-X_	G	SIN3A_ENCODE	4/1131	0.312918	0.999548	0.28135	0.999438	-1	2	NEK2;KIF20A;AURKB;CEP55
ENCODE_and_ChEA_Consensus_TFs_from_ChIP-X_	G	MYOD1_ENCODE	1/166	0.341141	0.999548	0.328817	0.999438	-1	1	PLA2G15
ENCODE_and_ChEA_Consensus_TFs_from_ChIP-X_	G	HNF4A_ENCODE	4/1276	0.396632	0.999548	0.361059	0.999438	-1	1	CLDN4;SLC6A12;NEK2;C4BPB
ENCODE_and_ChEA_Consensus_TFs_from_ChIP-X_	G	STAT5A_ENCODE	1/233	0.443809	0.999548	0.428729	0.999438	-1	1	AIM2
ENCODE_and_ChEA_Consensus_TFs_from_ChIP-X_	G	SUZ12_CHEA	5/1684	0.413864	0.999548	0.372211	0.999438	-1	1	POPDC3;KCNF1;CALCR;HTR7;SOWAHD
ENCODE_and_ChEA_Consensus_TFs_from_ChIP-X_	G	FOS_ENCODE	2/637	0.47598	0.999548	0.451185	0.999438	-1	1	PODNL1;CENPM
ENCODE_and_ChEA_Consensus_TFs_from_ChIP-X_	G	IRF3_ENCODE	2/663	0.497194	0.999548	0.472026	0.999438	-1	1	PODNL1;CENPM
ENCODE_and_ChEA_Consensus_TFs_from_ChIP-X_	G	NFYA_ENCODE	6/2250	0.498798	0.999548	0.45006	0.999438	-1	1	PLA2G15;PODNL1;CENPM;NEK2;KIF20A;AURKB
ENCODE_and_ChEA_Consensus_TFs_from_ChIP-X_	G	SOX2_CHEA	2/775	0.582305	0.999548	0.556406	0.999438	-1	1	CLDN4;NEK2
ENCODE_and_ChEA_Consensus_TFs_from_ChIP-X_	G	BHLHE40_ENCODE	1/348	0.584696	0.999548	0.567507	0.999438	-1	1	NEK2
ENCODE_and_ChEA_Consensus_TFs_from_ChIP-X_	G	NR2C2_ENCODE	1/350	0.586807	0.999548	0.569603	0.999438	-1	1	PLA2G15
ENCODE_and_ChEA_Consensus_TFs_from_ChIP-X_	G	SALL4_CHEA	1/355	0.592037	0.999548	0.5748	0.999438	-1	0	PLA2G7
ENCODE_and_ChEA_Consensus_TFs_from_ChIP-X_	G	REST_ENCODE	1/383	0.620152	0.999548	0.602796	0.999438	-1	0	STMN2
ENCODE_and_ChEA_Consensus_TFs_from_ChIP-X_	G	MAX_ENCODE	5/2073	0.602149	0.999548	0.559021	0.999438	-1	0	CENPM;KIF20A;AURKB;ADAMTS6;CEP55
ENCODE_and_ChEA_Consensus_TFs_from_ChIP-X_	G	E2F1_CHEA	2/859	0.639114	0.999548	0.613465	0.999438	-1	0	CENPM;AURKB
ENCODE_and_ChEA_Consensus_TFs_from_ChIP-X_	G	REST_CHEA	3/1280	0.628695	0.999548	0.596591	0.999438	-1	0	OTOA;STMN2;TMPRSS13
ENCODE_and_ChEA_Consensus_TFs_from_ChIP-X_	G	RELA_ENCODE	1/484	0.706654	0.999548	0.689642	0.999438	-1	0	AIM2
ENCODE_and_ChEA_Consensus_TFs_from_ChIP-X_	G	TP63_CHEA	3/1399	0.689076	0.999548	0.658385	0.999438	-1	0	HTR7;SLAMF6;AURKB
ENCODE_and_ChEA_Consensus_TFs_from_ChIP-X_	G	SP2_ENCODE	2/994	0.717799	0.999548	0.693618	0.999438	-1	0	PODNL1;CENPM
ENCODE_and_ChEA_Consensus_TFs_from_ChIP-X_	G	EGR1_ENCODE	1/537	0.743992	0.999548	0.727512	0.999438	-1	0	PLA2G15
ENCODE_and_ChEA_Consensus_TFs_from_ChIP-X_	G	PPARG_CHEA	1/535	0.742671	0.999548	0.726168	0.999438	-1	0	UBD
ENCODE_and_ChEA_Consensus_TFs_from_ChIP-X_	G	RFX5_ENCODE	1/559	0.758084	0.999548	0.741875	0.999438	-1	0	AURKB
ENCODE_and_ChEA_Consensus_TFs_from_ChIP-X_	G	MYC_CHEA	1/573	0.766653	0.999548	0.750629	0.999438	-1	0	KIF20A
ENCODE_and_ChEA_Consensus_TFs_from_ChIP-X_	G	TCF7L2_ENCODE	1/583	0.772591	0.999548	0.756704	0.999438	-1	0	NEK2
ENCODE_and_ChEA_Consensus_TFs_from_ChIP-X_	G	AR_CHEA	2/1095	0.767054	0.999548	0.744556	0.999438	0	0	MMP7;KIF20A
ENCODE_and_ChEA_Consensus_TFs_from_ChIP-X_	G	NANOG_CHEA	1/595	0.779522	0.999548	0.763804	0.999438	0	0	MCF2
ENCODE_and_ChEA_Consensus_TFs_from_ChIP-X_	G	TAF7_ENCODE	1/640	0.803715	0.999548	0.788678	0.999438	0	0	PRAME
ENCODE_and_ChEA_Consensus_TFs_from_ChIP-X_	G	CHD1_ENCODE	1/655	0.811186	0.999548	0.796388	0.999438	0	0	AURKB
ENCODE_and_ChEA_Consensus_TFs_from_ChIP-X_	G	RAD21_ENCODE	2/1265	0.833527	0.999548	0.814438	0.999438	0	0	MYEOV;KIF20A
ENCODE_and_ChEA_Consensus_TFs_from_ChIP-X_	G	SP1_ENCODE	1/707	0.834989	0.999548	0.821055	0.999438	0	0	PODNL1
ENCODE_and_ChEA_Consensus_TFs_from_ChIP-X_	G	STAT3_ENCODE	1/725	0.842523	0.999548	0.828896	0.999438	0	0	KIF20A
ENCODE_and_ChEA_Consensus_TFs_from_ChIP-X_	G	ZNF384_ENCODE	1/730	0.844555	0.999548	0.831014	0.999438	0	0	ADAMTS6
ENCODE_and_ChEA_Consensus_TFs_from_ChIP-X_	G	USF1_ENCODE	2/1423	0.879747	0.999548	0.86399	0.999438	0	0	CENPM;ADAMTS6
ENCODE_and_ChEA_Consensus_TFs_from_ChIP-X_	G	NFYB_ENCODE	7/3715	0.8457	0.999548	0.81401	0.999438	0	0	PLA2G15;PODNL1;CENPM;NEK2;KIF20A;AURKB;CEP55
ENCODE_and_ChEA_Consensus_TFs_from_ChIP-X_	G	ZMIZ1_ENCODE	1/914	0.903845	0.999548	0.893462	0.999438	0	0	TBC1D10C
ENCODE_and_ChEA_Consensus_TFs_from_ChIP-X_	G	USF2_ENCODE	1/965	0.9159	0.999548	0.906345	0.999438	0	0	ADAMTS6
ENCODE_and_ChEA_Consensus_TFs_from_ChIP-X_	G	PBX3_ENCODE	1/1269	0.962438	0.999548	0.956971	0.999438	0	0	PODNL1
ENCODE_and_ChEA_Consensus_TFs_from_ChIP-X_	G	ATF2_ENCODE	1/2852	0.999548	0.999548	0.999438	0.999438	0	0	ADAMTS6
ENCODE_and_ChEA_Consensus_TFs_from_ChIP-X_	G	ZBTB7A_ENCODE	3/2184	0.921516	0.999548	0.907769	0.999438	0	0	PLA2G15;HTR7;CENPM
ENCODE_and_ChEA_Consensus_TFs_from_ChIP-X_	G	TAF1_ENCODE	2/3346	0.998843	0.999548	0.998556	0.999438	0	0	PODNL1;KIF20A
ENCODE_and_ChEA_Consensus_TFs_from_ChIP-X_	G	BRCA1_ENCODE	2/3218	0.998372	0.999548	0.99797	0.999438	0	0	CENPM;AURKB
ENCODE_and_ChEA_Consensus_TFs_from_ChIP-X_	G	NRF1_ENCODE	2/1882	0.955926	0.999548	0.948221	0.999438	0	0	ADAMTS6;SKA1
ENCODE_and_ChEA_Consensus_TFs_from_ChIP-X_	G	YY1_ENCODE	2/2753	0.994576	0.999548	0.993307	0.999438	0	0	PODNL1;KIF20A
ENCODE_and_ChEA_Consensus_TFs_from_ChIP-X_	G	ELF1_ENCODE	2/2483	0.989369	0.999548	0.987033	0.999438	0	0	PLA2G15;CEP55
ENCODE_and_ChEA_Consensus_TFs_from_ChIP-X_	G	RUNX1_CHEA	1/1294	0.964868	0.999548	0.959666	0.999438	0	0	ITGAL
ENCODE_and_ChEA_Consensus_TFs_from_ChIP-X_	G	E2F6_ENCODE	4/3245	0.971656	0.999548	0.965126	0.999438	0	0	RASL11B;CENPM;AURKB;CEP55
ENCODE_and_ChEA_Consensus_TFs_from_ChIP-X_	G	CREB1_CHEA	1/1444	0.976523	0.999548	0.972707	0.999438	0	0	CEP55
ENCODE_and_ChEA_Consensus_TFs_from_ChIP-X_	H	SUZ12_ENCODE	2/105	0.0273545	0.999874	0.0116783	0.256922	-2	6	NPR3;WNT1
ENCODE_and_ChEA_Consensus_TFs_from_ChIP-X_	H	SUZ12_CHEA	8/1684	0.0506021	0.999874	0.00282576	0.124334	-2	4	WNT10B;JUN;GPR12;NPR3;EPHX4;ZNF385B;WNT1;HES5
ENCODE_and_ChEA_Consensus_TFs_from_ChIP-X_	H	RELA_ENCODE	3/484	0.115059	0.999874	0.0377137	0.553135	-2	4	SPIB;JUN;CD69
ENCODE_and_ChEA_Consensus_TFs_from_ChIP-X_	H	VDR_CHEA	1/76	0.170373	0.999874	0.112148	0.704928	-2	3	CD69
ENCODE_and_ChEA_Consensus_TFs_from_ChIP-X_	H	EGR1_CHEA	2/315	0.180325	0.999874	0.0848998	0.622599	-2	3	JUN;CXCL9
ENCODE_and_ChEA_Consensus_TFs_from_ChIP-X_	H	KLF4_CHEA	4/987	0.22173	0.999874	0.0624908	0.5819	-2	2	TPPP3;NPR3;SPP1;WNT1
ENCODE_and_ChEA_Consensus_TFs_from_ChIP-X_	H	TCF3_CHEA	4/1006	0.231725	0.999874	0.066125	0.5819	-1	2	LMO3;ADAM23;NPR3;SPP1
ENCODE_and_ChEA_Consensus_TFs_from_ChIP-X_	H	ESR1_CHEA	1/154	0.315603	0.999874	0.21341	0.757103	-1	2	CXCL9
ENCODE_and_ChEA_Consensus_TFs_from_ChIP-X_	H	MYOD1_ENCODE	1/166	0.335613	0.999874	0.227971	0.757103	-1	2	TPPP3
ENCODE_and_ChEA_Consensus_TFs_from_ChIP-X_	H	PPARG_CHEA	2/535	0.378587	0.999874	0.199695	0.757103	-1	1	JUN;CD69
ENCODE_and_ChEA_Consensus_TFs_from_ChIP-X_	H	RUNX1_CHEA	4/1294	0.392105	0.999874	0.134361	0.738983	-1	1	GPR12;CD69;CD3E;CD3D
ENCODE_and_ChEA_Consensus_TFs_from_ChIP-X_	H	TRIM28_CHEA	1/210	0.404197	0.999874	0.279183	0.757103	-1	1	JUN
ENCODE_and_ChEA_Consensus_TFs_from_ChIP-X_	H	SMAD4_CHEA	2/584	0.421103	0.999874	0.227597	0.757103	-1	1	WSCD2;CD3E
ENCODE_and_ChEA_Consensus_TFs_from_ChIP-X_	H	EZH2_CHEA	1/237	0.442796	0.999874	0.308979	0.757103	-1	1	WNT1
ENCODE_and_ChEA_Consensus_TFs_from_ChIP-X_	H	IRF1_ENCODE	1/263	0.477646	0.999874	0.336553	0.776588	-1	1	JUN
ENCODE_and_ChEA_Consensus_TFs_from_ChIP-X_	H	NFIC_ENCODE	1/279	0.49802	0.999874	0.352994	0.776588	-1	1	JUN
ENCODE_and_ChEA_Consensus_TFs_from_ChIP-X_	H	SPI1_ENCODE	4/1540	0.527543	0.999874	0.209321	0.757103	-1	1	TPPP3;WSCD2;ANGPTL5;WNT1
ENCODE_and_ChEA_Consensus_TFs_from_ChIP-X_	H	TP53_CHEA	1/319	0.545612	0.999874	0.392407	0.820624	-1	1	NPR3
ENCODE_and_ChEA_Consensus_TFs_from_ChIP-X_	H	EZH2_ENCODE	1/338	0.566641	0.999874	0.410312	0.820624	-1	1	GPR12
ENCODE_and_ChEA_Consensus_TFs_from_ChIP-X_	H	SMC3_ENCODE	3/1181	0.559079	0.999874	0.273471	0.757103	-1	1	JUN;NPR3;WNT1
ENCODE_and_ChEA_Consensus_TFs_from_ChIP-X_	H	RAD21_ENCODE	3/1265	0.606747	0.999874	0.309724	0.757103	-1	1	JUN;SPP1;WNT1
ENCODE_and_ChEA_Consensus_TFs_from_ChIP-X_	H	CTCF_ENCODE	4/1790	0.649716	0.999874	0.296039	0.757103	-1	0	JUN;NPR3;SPP1;WNT1
ENCODE_and_ChEA_Consensus_TFs_from_ChIP-X_	H	AR_CHEA	2/1095	0.757203	0.999874	0.511399	0.958695	-1	0	CRTAM;ZNF385B
ENCODE_and_ChEA_Consensus_TFs_from_ChIP-X_	H	NANOG_CHEA	1/595	0.772744	0.999874	0.607987	0.958695	-1	0	SPP1
ENCODE_and_ChEA_Consensus_TFs_from_ChIP-X_	H	FOS_ENCODE	1/637	0.795662	0.999874	0.633534	0.958695	-1	0	TM4SF19
ENCODE_and_ChEA_Consensus_TFs_from_ChIP-X_	H	TAF7_ENCODE	1/640	0.79721	0.999874	0.635297	0.958695	-1	0	JUN
ENCODE_and_ChEA_Consensus_TFs_from_ChIP-X_	H	CHD1_ENCODE	1/655	0.804776	0.999874	0.643988	0.958695	-1	0	JUN
ENCODE_and_ChEA_Consensus_TFs_from_ChIP-X_	H	STAT3_ENCODE	1/725	0.836585	0.999874	0.681988	0.958695	-1	0	JUN
ENCODE_and_ChEA_Consensus_TFs_from_ChIP-X_	H	REST_CHEA	2/1280	0.830114	0.999874	0.598593	0.958695	-1	0	GPR12;ADAM23
ENCODE_and_ChEA_Consensus_TFs_from_ChIP-X_	H	CEBPD_ENCODE	1/734	0.840286	0.999874	0.686582	0.958695	-1	0	JUN
ENCODE_and_ChEA_Consensus_TFs_from_ChIP-X_	H	GATA2_CHEA	1/772	0.855031	0.999874	0.705287	0.958695	-1	0	JUN
ENCODE_and_ChEA_Consensus_TFs_from_ChIP-X_	H	SOX2_CHEA	1/775	0.856137	0.999874	0.706718	0.958695	-1	0	SPP1
ENCODE_and_ChEA_Consensus_TFs_from_ChIP-X_	H	BCLAF1_ENCODE	1/851	0.881545	0.999874	0.74081	0.958695	-1	0	JUN
ENCODE_and_ChEA_Consensus_TFs_from_ChIP-X_	H	GATA1_CHEA	1/807	0.867427	0.999874	0.721566	0.958695	-1	0	SLFN14
ENCODE_and_ChEA_Consensus_TFs_from_ChIP-X_	H	NFE2L2_CHEA	1/1022	0.923718	0.999874	0.804184	0.996993	0	0	ADAM23
ENCODE_and_ChEA_Consensus_TFs_from_ChIP-X_	H	HNF4A_ENCODE	1/1276	0.960616	0.999874	0.871677	0.996993	0	0	SOAT2
ENCODE_and_ChEA_Consensus_TFs_from_ChIP-X_	H	TP63_CHEA	1/1399	0.971497	0.999874	0.895709	0.996993	0	0	AKNAD1
ENCODE_and_ChEA_Consensus_TFs_from_ChIP-X_	H	NFYA_ENCODE	2/2250	0.979297	0.999874	0.880793	0.996993	0	0	JUN;ANGPTL5
ENCODE_and_ChEA_Consensus_TFs_from_ChIP-X_	H	PML_ENCODE	1/1596	0.983095	0.999874	0.925463	0.996993	0	0	JUN
ENCODE_and_ChEA_Consensus_TFs_from_ChIP-X_	H	BRCA1_ENCODE	2/3218	0.998095	0.999874	0.972019	0.996993	0	0	JUN;NPR3
ENCODE_and_ChEA_Consensus_TFs_from_ChIP-X_	H	YY1_ENCODE	1/2753	0.999301	0.999874	0.990629	0.996993	0	0	ANGPTL5
ENCODE_and_ChEA_Consensus_TFs_from_ChIP-X_	H	ATF2_ENCODE	1/2852	0.999473	0.999874	0.99222	0.996993	0	0	JUN
ENCODE_and_ChEA_Consensus_TFs_from_ChIP-X_	H	NFYB_ENCODE	2/3715	0.999489	0.999874	0.987729	0.996993	0	0	JUN;ANGPTL5
ENCODE_and_ChEA_Consensus_TFs_from_ChIP-X_	H	TAF1_ENCODE	1/3346	0.999874	0.999874	0.996993	0.996993	0	0	JUN
ENCODE_and_ChEA_Consensus_TFs_from_ChIP-X_	I	SUZ12_CHEA	21/1684	0.00171259	0.111318	0.000337059	0.0219088	-2	10	EOMES;ZMYND15;ROBO2;SEMA5B;GPR26;CDKN2A;CD70;ADAM33;CXCR4;TCF21;KCNA6;GDF6;WNT16;C9ORF50;LOXL1;WNT6;FGF16;SFRP2;FRZB;PLXNC1;IGFBP6
ENCODE_and_ChEA_Consensus_TFs_from_ChIP-X_	I	IRF8_CHEA	4/121	0.00704146	0.228847	0.00518323	0.168455	-2	9	RTP4;HLA-DMB;BLNK;MS4A1
ENCODE_and_ChEA_Consensus_TFs_from_ChIP-X_	I	TP63_CHEA	13/1399	0.0978361	1	0.0477994	1	-2	4	EOMES;CD52;KCNJ5;GPR1;LOXL1;ADAMTS16;SCML4;IFNG;CTSK;WDR91;BLNK;SLAMF7;PLXNC1
ENCODE_and_ChEA_Consensus_TFs_from_ChIP-X_	I	TRIM28_CHEA	3/210	0.14442	1	0.115393	1	-2	3	EOMES;GPR26;GDF6
ENCODE_and_ChEA_Consensus_TFs_from_ChIP-X_	I	SUZ12_ENCODE	2/105	0.140064	1	0.119375	1	-2	3	ZMYND15;MCOLN2
ENCODE_and_ChEA_Consensus_TFs_from_ChIP-X_	I	EZH2_ENCODE	4/338	0.161737	1	0.122898	1	-2	3	CD8A;GIPR;PAPLN;SPTSSB
ENCODE_and_ChEA_Consensus_TFs_from_ChIP-X_	I	RAD21_ENCODE	11/1265	0.167532	1	0.0955526	1	-2	3	ADAMTS16;SEMA5B;FOXS1;CCDC110;C20ORF203;CD8A;FKBP7;IGFBP6;HAO2;BEND6;CTHRC1
ENCODE_and_ChEA_Consensus_TFs_from_ChIP-X_	I	NANOG_CHEA	5/595	0.315368	1	0.241137	1	-1	2	RTP4;CDX1;BLNK;ANKRD10;C9ORF50
ENCODE_and_ChEA_Consensus_TFs_from_ChIP-X_	I	TP53_CHEA	3/319	0.321593	1	0.26597	1	-1	2	GDF15;ANKRD10;EDA2R
ENCODE_and_ChEA_Consensus_TFs_from_ChIP-X_	I	RELA_ENCODE	4/484	0.358427	1	0.287548	1	-1	2	FCER2;CD70;CXCR4;MS4A1
ENCODE_and_ChEA_Consensus_TFs_from_ChIP-X_	I	GATA1_CHEA	6/807	0.391852	1	0.297935	1	-1	1	LIPC;GDF15;ABCB5;PLXNC1;SFI1;CCR3
ENCODE_and_ChEA_Consensus_TFs_from_ChIP-X_	I	EZH2_CHEA	2/237	0.437344	1	0.384512	1	-1	1	WNT6;PLXNC1
ENCODE_and_ChEA_Consensus_TFs_from_ChIP-X_	I	TCF3_CHEA	7/1006	0.441059	1	0.332524	1	-1	1	EOMES;RTP4;FRZB;CDX1;ANKRD10;ACP5;C9ORF50
ENCODE_and_ChEA_Consensus_TFs_from_ChIP-X_	I	NFE2L2_CHEA	7/1022	0.457459	1	0.347167	1	-1	1	RTP4;SFRP2;SCML4;SETBP1;WDR91;MCOLN2;DCN
ENCODE_and_ChEA_Consensus_TFs_from_ChIP-X_	I	SMC3_ENCODE	8/1181	0.45975	1	0.340826	1	-1	1	ADAMTS16;SEMA5B;FOXS1;CCDC110;SETBP1;GDF15;BEND6;CTHRC1
ENCODE_and_ChEA_Consensus_TFs_from_ChIP-X_	I	SMAD4_CHEA	4/584	0.497807	1	0.414068	1	-1	1	ADAMTS16;SEMA5B;SETBP1;ABCB5
ENCODE_and_ChEA_Consensus_TFs_from_ChIP-X_	I	POU5F1_CHEA	2/261	0.487051	1	0.431174	1	-1	1	SFRP2;CDX1
ENCODE_and_ChEA_Consensus_TFs_from_ChIP-X_	I	HNF4A_ENCODE	8/1276	0.548476	1	0.422726	1	-1	1	ACY3;RBP5;EXOC3L4;GDF15;EPO;SARDH;MZB1;PLXNC1
ENCODE_and_ChEA_Consensus_TFs_from_ChIP-X_	I	EGR1_CHEA	2/315	0.588411	1	0.52886	1	-1	1	LIPC;SLAMF7
ENCODE_and_ChEA_Consensus_TFs_from_ChIP-X_	I	YY1_CHEA	2/332	0.617129	1	0.55723	1	-1	1	ZFP37;DCN
ENCODE_and_ChEA_Consensus_TFs_from_ChIP-X_	I	ESR1_CHEA	1/154	0.62063	1	0.580383	1	-1	0	GDF15
ENCODE_and_ChEA_Consensus_TFs_from_ChIP-X_	I	SALL4_CHEA	2/355	0.653525	1	0.593683	1	-1	0	CDKN2A;CXCR4
ENCODE_and_ChEA_Consensus_TFs_from_ChIP-X_	I	MYOD1_ENCODE	1/166	0.648339	1	0.60781	1	-1	0	TMEM119
ENCODE_and_ChEA_Consensus_TFs_from_ChIP-X_	I	HDAC2_ENCODE	1/175	0.667793	1	0.627209	1	-1	0	FKBP7
ENCODE_and_ChEA_Consensus_TFs_from_ChIP-X_	I	AR_CHEA	6/1095	0.686595	1	0.580487	1	-1	0	ABCA10;EXOC3L4;ABCB5;LY9;HAO2;BEND6
ENCODE_and_ChEA_Consensus_TFs_from_ChIP-X_	I	REST_CHEA	7/1280	0.695485	1	0.580834	1	-1	0	GPR26;CHIC1;FGF14;HKDC1;TAGAP;BLNK;CLEC4F
ENCODE_and_ChEA_Consensus_TFs_from_ChIP-X_	I	SOX2_CHEA	4/775	0.718641	1	0.635075	1	-1	0	RTP4;GPR1;FKBP7;ANKRD10
ENCODE_and_ChEA_Consensus_TFs_from_ChIP-X_	I	FOSL2_ENCODE	1/196	0.709134	1	0.668864	1	-1	0	IGFBP6
ENCODE_and_ChEA_Consensus_TFs_from_ChIP-X_	I	NELFE_ENCODE	1/234	0.771388	1	0.732875	1	-1	0	GDF15
ENCODE_and_ChEA_Consensus_TFs_from_ChIP-X_	I	CTCF_ENCODE	9/1790	0.797613	1	0.681834	1	-1	0	ADAMTS16;SEMA5B;FOXS1;CCDC110;SETBP1;GDF15;FKBP7;BEND6;CTHRC1
ENCODE_and_ChEA_Consensus_TFs_from_ChIP-X_	I	BCL3_ENCODE	1/273	0.821539	1	0.785846	1	-1	0	PRRT2
ENCODE_and_ChEA_Consensus_TFs_from_ChIP-X_	I	NFIC_ENCODE	1/279	0.828219	1	0.793016	1	-1	0	FKBP7
ENCODE_and_ChEA_Consensus_TFs_from_ChIP-X_	I	RUNX1_CHEA	6/1294	0.826574	1	0.739636	1	-1	0	FOXS1;RGS1;MATK;TNFRSF13C;PI16;GGT1
ENCODE_and_ChEA_Consensus_TFs_from_ChIP-X_	I	ZNF384_ENCODE	3/730	0.83933	1	0.780488	1	-1	0	CD52;CXCR4;FKBP7
ENCODE_and_ChEA_Consensus_TFs_from_ChIP-X_	I	KLF4_CHEA	4/987	0.870521	1	0.809337	1	0	0	EOMES;WNT6;ANKRD10;ACP5
ENCODE_and_ChEA_Consensus_TFs_from_ChIP-X_	I	SPI1_CHEA	4/1056	0.901821	1	0.84916	1	0	0	RGS1;TAGAP;PLD4;PI16
ENCODE_and_ChEA_Consensus_TFs_from_ChIP-X_	I	PPARG_CHEA	1/535	0.966626	1	0.952194	1	0	0	WDR91
ENCODE_and_ChEA_Consensus_TFs_from_ChIP-X_	I	TCF7L2_ENCODE	1/583	0.975513	1	0.963781	1	0	0	XKRX
ENCODE_and_ChEA_Consensus_TFs_from_ChIP-X_	I	IRF3_ENCODE	1/663	0.985409	1	0.977239	1	0	0	C12ORF60
ENCODE_and_ChEA_Consensus_TFs_from_ChIP-X_	I	PBX3_ENCODE	3/1269	0.987744	1	0.976481	1	0	0	KHDRBS2;PRRT2;C12ORF60
ENCODE_and_ChEA_Consensus_TFs_from_ChIP-X_	I	ZBTB33_ENCODE	1/702	0.988672	1	0.981868	1	0	0	VANGL2
ENCODE_and_ChEA_Consensus_TFs_from_ChIP-X_	I	RCOR1_ENCODE	1/702	0.988672	1	0.981868	1	0	0	ANKRD10
ENCODE_and_ChEA_Consensus_TFs_from_ChIP-X_	I	STAT3_ENCODE	1/725	0.990246	1	0.984148	1	0	0	C12ORF60
ENCODE_and_ChEA_Consensus_TFs_from_ChIP-X_	I	GATA2_CHEA	1/772	0.992818	1	0.987962	1	0	0	PI16
ENCODE_and_ChEA_Consensus_TFs_from_ChIP-X_	I	SIX5_ENCODE	2/1094	0.992847	1	0.986542	1	0	0	ZFP37;MAP3K12
ENCODE_and_ChEA_Consensus_TFs_from_ChIP-X_	I	ZBTB7A_ENCODE	6/2184	0.995137	1	0.987409	1	0	0	GDF15;ANKRD10;TNFRSF13C;IGFBP6;ART5;CTHRC1
ENCODE_and_ChEA_Consensus_TFs_from_ChIP-X_	I	E2F1_CHEA	1/859	0.995933	1	0.992784	1	0	0	CHIC1
ENCODE_and_ChEA_Consensus_TFs_from_ChIP-X_	I	TAF1_ENCODE	2/3346	1	1	1	1	1	0	WDR91;C12ORF60
ENCODE_and_ChEA_Consensus_TFs_from_ChIP-X_	I	ELF1_ENCODE	1/2483	1	1	1	1	1	0	ANKRD10
ENCODE_and_ChEA_Consensus_TFs_from_ChIP-X_	I	E2F6_ENCODE	3/3245	1	1	1	1	1	0	CD8A;SFI1;CTHRC1
ENCODE_and_ChEA_Consensus_TFs_from_ChIP-X_	I	BRCA1_ENCODE	3/3218	1	1	0.999999	1	1	0	ANKRD10;SFI1;MAP3K12
ENCODE_and_ChEA_Consensus_TFs_from_ChIP-X_	I	GABPA_ENCODE	1/2082	0.999999	1	0.999996	1	0	0	C12ORF60
ENCODE_and_ChEA_Consensus_TFs_from_ChIP-X_	I	ATF2_ENCODE	3/2852	0.999999	1	0.999995	1	1	0	RBP5;BEND6;MAP3K12
ENCODE_and_ChEA_Consensus_TFs_from_ChIP-X_	I	NFYB_ENCODE	6/3715	0.999999	1	0.999993	1	1	0	PMEL;PRRT2;WDR91;C12ORF60;HAO2;MAP3K12
ENCODE_and_ChEA_Consensus_TFs_from_ChIP-X_	I	YY1_ENCODE	3/2753	0.999998	1	0.999991	1	0	0	WDR91;C12ORF60;ZFP37
ENCODE_and_ChEA_Consensus_TFs_from_ChIP-X_	I	NRF1_ENCODE	1/1882	0.999996	1	0.999986	1	0	0	SFI1
ENCODE_and_ChEA_Consensus_TFs_from_ChIP-X_	I	PML_ENCODE	1/1596	0.99997	1	0.999917	1	0	0	PRRT2
ENCODE_and_ChEA_Consensus_TFs_from_ChIP-X_	I	CREB1_ENCODE	3/2238	0.999951	1	0.999831	1	0	0	C12ORF60;FKBP7;MAP3K12
ENCODE_and_ChEA_Consensus_TFs_from_ChIP-X_	I	NFYA_ENCODE	3/2250	0.999955	1	0.999842	1	0	0	PMEL;C12ORF60;MAP3K12
ENCODE_and_ChEA_Consensus_TFs_from_ChIP-X_	I	USF1_ENCODE	1/1423	0.999904	1	0.999757	1	0	0	CHIC1
ENCODE_and_ChEA_Consensus_TFs_from_ChIP-X_	I	SPI1_ENCODE	2/1540	0.999503	1	0.998761	1	0	0	CD52;SLAMF7
ENCODE_and_ChEA_Consensus_TFs_from_ChIP-X_	I	USF2_ENCODE	1/965	0.997973	1	0.996148	1	0	0	ANKRD10
ENCODE_and_ChEA_Consensus_TFs_from_ChIP-X_	I	ZMIZ1_ENCODE	1/914	0.997165	1	0.994787	1	0	0	ANKRD10
ENCODE_and_ChEA_Consensus_TFs_from_ChIP-X_	I	TCF3_ENCODE	1/840	0.995394	1	0.991929	1	0	0	BLNK
ENCODE_and_ChEA_Consensus_TFs_from_ChIP-X_	I	SP2_ENCODE	1/994	0.998326	1	0.996758	1	0	0	C12ORF60
ENCODE_and_ChEA_Consensus_TFs_from_ChIP-X_	J	SUZ12_CHEA	25/1684	7.20649e-06	0.000490041	4.88265e-06	0.00033202	-2	18	DPP10;SLC44A5;ALOX15;HTRA4;AEBP1;SLC4A4;COMP;GRM7;FGF9;PRKG2;VAT1L;FAM19A3;NTNG1;EPHA5;CCBE1;WNT10A;SCARA3;TRPC4;EYA4;VASH2;IFNLR1;SORCS2;GDNF;ROR2;LY6H
ENCODE_and_ChEA_Consensus_TFs_from_ChIP-X_	J	TP53_CHEA	7/319	0.00236122	0.0802814	0.00239479	0.0814229	-2	10	NTNG1;COL1A1;CCBE1;GDNF;CALD1;PMAIP1;SORCS2
ENCODE_and_ChEA_Consensus_TFs_from_ChIP-X_	J	REST_CHEA	14/1280	0.0140778	0.319098	0.0128756	0.291847	-2	7	DPP10;LRRC15;SPNS3;DBH;CPZ;PPP4R4;PMAIP1;CNGA3;BMPR1B;ERC2;LY6H;CCL17;VAT1L;SLC28A3
ENCODE_and_ChEA_Consensus_TFs_from_ChIP-X_	J	NFE2L2_CHEA	11/1022	0.0314865	0.53527	0.0297828	0.506307	-2	5	BCAR3;GDNF;EYA4;ARAP2;RASSF8;LMO7;ERC2;SLC4A4;NALCN;GLI2;EPHB3
ENCODE_and_ChEA_Consensus_TFs_from_ChIP-X_	J	EZH2_ENCODE	5/338	0.0443083	0.602593	0.0440462	0.599029	-2	5	ZNF250;ZFR2;ALOX15;ARMC4;SLC4A4
ENCODE_and_ChEA_Consensus_TFs_from_ChIP-X_	J	CBX3_ENCODE	2/81	0.0780486	0.884551	0.0794193	0.884024	-2	4	EFCAB7;APOBEC3B
ENCODE_and_ChEA_Consensus_TFs_from_ChIP-X_	J	AR_CHEA	10/1095	0.0949328	0.911758	0.0910025	0.884024	-1	3	NTNG1;EPHA5;SLC22A15;TRPA1;CRISPLD1;COL22A1;ITGB8;IFNLR1;ROR2;PHF21A
ENCODE_and_ChEA_Consensus_TFs_from_ChIP-X_	J	SMAD4_CHEA	6/584	0.116979	0.911758	0.114704	0.918883	-1	3	BCAR3;SLC44A5;TRPA1;KCNB2;ROR2;CLDN1
ENCODE_and_ChEA_Consensus_TFs_from_ChIP-X_	J	SUZ12_ENCODE	2/105	0.120674	0.911758	0.121617	0.918883	-1	3	COMP;EYA4
ENCODE_and_ChEA_Consensus_TFs_from_ChIP-X_	J	SOX2_CHEA	7/775	0.154012	1	0.150281	1	-1	3	NTNG1;CALB2;LRRC15;PHC1;CALD1;DPYS;PMAIP1
ENCODE_and_ChEA_Consensus_TFs_from_ChIP-X_	J	TP63_CHEA	11/1399	0.173605	1	0.166734	1	-1	2	CDS1;WNT10A;SCARA3;SLC22A15;CDH3;FGF9;TMEM52B;TNFSF15;DPEP1;LMO7;SLC28A3
ENCODE_and_ChEA_Consensus_TFs_from_ChIP-X_	J	PPARD_CHEA	3/285	0.221991	1	0.220447	1	-1	2	SPNS3;SCG2;SLC4A4
ENCODE_and_ChEA_Consensus_TFs_from_ChIP-X_	J	SMC3_ENCODE	9/1181	0.231256	1	0.22457	1	-1	2	BCAR3;COL1A1;C1S;ADAMTSL2;CPZ;SORCS2;THBS3;FAM19A3;EPHB3
ENCODE_and_ChEA_Consensus_TFs_from_ChIP-X_	J	MYOD1_ENCODE	2/166	0.244308	1	0.243711	1	-1	2	TNFSF15;CHD3
ENCODE_and_ChEA_Consensus_TFs_from_ChIP-X_	J	EGR1_CHEA	3/315	0.267561	1	0.265426	1	-1	2	CALD1;RORC;GLI2
ENCODE_and_ChEA_Consensus_TFs_from_ChIP-X_	J	CTCF_ENCODE	12/1790	0.321707	1	0.311624	1	-1	1	CALB2;COL1A1;CCBE1;ZNF250;ADAMTSL2;CPZ;SORCS2;CLDN1;THBS3;FAM19A3;EPHB3;APOBEC3B
ENCODE_and_ChEA_Consensus_TFs_from_ChIP-X_	J	TRIM28_CHEA	2/210	0.336856	1	0.335161	1	-1	1	GDNF;HUNK
ENCODE_and_ChEA_Consensus_TFs_from_ChIP-X_	J	TCF3_CHEA	7/1006	0.349794	1	0.34313	1	-1	1	BCAR3;COMP;MMP11;PHC1;AEBP1;CHD3;LDHAL6B
ENCODE_and_ChEA_Consensus_TFs_from_ChIP-X_	J	REST_ENCODE	3/383	0.373348	1	0.370035	1	-1	1	DPP10;CNGA3;SCG2
ENCODE_and_ChEA_Consensus_TFs_from_ChIP-X_	J	EZH2_CHEA	2/237	0.392172	1	0.389901	1	-1	1	COMP;FGF9
ENCODE_and_ChEA_Consensus_TFs_from_ChIP-X_	J	ZNF384_ENCODE	5/730	0.403221	1	0.397752	1	-1	1	PHC1;PMAIP1;CHD3;PHF21A;THBS3
ENCODE_and_ChEA_Consensus_TFs_from_ChIP-X_	J	RAD21_ENCODE	8/1265	0.43367	1	0.425792	1	-1	1	COL1A1;ADAMTSL2;CPZ;SORCS2;CLDN1;THBS3;FAM19A3;EPHB3
ENCODE_and_ChEA_Consensus_TFs_from_ChIP-X_	J	VDR_CHEA	1/76	0.352903	1	0.3529	1	-1	1	VASH2
ENCODE_and_ChEA_Consensus_TFs_from_ChIP-X_	J	ZEB1_ENCODE	1/106	0.455305	1	0.454154	1	-1	1	ETV7
ENCODE_and_ChEA_Consensus_TFs_from_ChIP-X_	J	TRIM28_ENCODE	1/120	0.497426	1	0.49588	1	-1	0	APOBEC3B
ENCODE_and_ChEA_Consensus_TFs_from_ChIP-X_	J	FOXP2_ENCODE	1/178	0.640142	1	0.637655	1	-1	0	ZNF250
ENCODE_and_ChEA_Consensus_TFs_from_ChIP-X_	J	ESR1_CHEA	1/154	0.586751	1	0.584539	1	-1	0	PON1
ENCODE_and_ChEA_Consensus_TFs_from_ChIP-X_	J	NANOG_CHEA	3/595	0.663448	1	0.658925	1	-1	0	CDS1;PHC1;CDH3
ENCODE_and_ChEA_Consensus_TFs_from_ChIP-X_	J	FOSL2_ENCODE	1/196	0.675643	1	0.673032	1	-1	0	MAST2
ENCODE_and_ChEA_Consensus_TFs_from_ChIP-X_	J	FOXA1_ENCODE	1/205	0.692068	1	0.689417	1	-1	0	CALD1
ENCODE_and_ChEA_Consensus_TFs_from_ChIP-X_	J	NELFE_ENCODE	1/234	0.739588	1	0.736887	1	-1	0	PMAIP1
ENCODE_and_ChEA_Consensus_TFs_from_ChIP-X_	J	RELA_ENCODE	2/484	0.76644	1	0.762926	1	-1	0	ITGB8;PMAIP1
ENCODE_and_ChEA_Consensus_TFs_from_ChIP-X_	J	EGR1_ENCODE	2/537	0.814603	1	0.811407	1	-1	0	COL1A1;APOBEC3B
ENCODE_and_ChEA_Consensus_TFs_from_ChIP-X_	J	POU5F1_CHEA	1/261	0.777264	1	0.7746	1	0	0	PHC1
ENCODE_and_ChEA_Consensus_TFs_from_ChIP-X_	J	PPARG_CHEA	2/535	0.812957	1	0.809748	1	-1	0	RASSF8;FAM92B
ENCODE_and_ChEA_Consensus_TFs_from_ChIP-X_	J	FOXA2_ENCODE	1/316	0.838099	1	0.835668	1	0	0	ZNF250
ENCODE_and_ChEA_Consensus_TFs_from_ChIP-X_	J	KLF4_CHEA	4/987	0.820014	1	0.816301	1	0	0	PHC1;ROR2;SORCS2;IGSF9
ENCODE_and_ChEA_Consensus_TFs_from_ChIP-X_	J	GATA1_CHEA	3/807	0.843778	1	0.840578	1	0	0	BCAR3;ROR2;PHF21A
ENCODE_and_ChEA_Consensus_TFs_from_ChIP-X_	J	RUNX1_CHEA	5/1294	0.867942	1	0.864952	1	0	0	P2RX7;RORC;AEBP1;CHD3;F2RL3
ENCODE_and_ChEA_Consensus_TFs_from_ChIP-X_	J	SALL4_CHEA	1/355	0.870945	1	0.868746	1	0	0	BCAR3
ENCODE_and_ChEA_Consensus_TFs_from_ChIP-X_	J	STAT3_ENCODE	2/725	0.922014	1	0.920171	1	0	0	ITGB8;PMAIP1
ENCODE_and_ChEA_Consensus_TFs_from_ChIP-X_	J	RCOR1_ENCODE	2/702	0.913007	1	0.911009	1	0	0	IL12A;PHF21A
ENCODE_and_ChEA_Consensus_TFs_from_ChIP-X_	J	GATA2_CHEA	2/772	0.937778	1	0.936233	1	0	0	BCAR3;CHD3
ENCODE_and_ChEA_Consensus_TFs_from_ChIP-X_	J	TCF3_ENCODE	2/840	0.955367	1	0.954195	1	0	0	FGF9;TNFSF15
ENCODE_and_ChEA_Consensus_TFs_from_ChIP-X_	J	FLI1_ENCODE	1/650	0.977118	1	0.976472	1	0	0	F2RL3
ENCODE_and_ChEA_Consensus_TFs_from_ChIP-X_	J	PBX3_ENCODE	3/1269	0.978503	1	0.977955	1	0	0	ERC2;PHF21A;EPHB3
ENCODE_and_ChEA_Consensus_TFs_from_ChIP-X_	J	CHD1_ENCODE	1/655	0.977784	1	0.977154	1	0	0	PMAIP1
ENCODE_and_ChEA_Consensus_TFs_from_ChIP-X_	J	E2F4_ENCODE	1/710	0.983957	1	0.983482	1	0	0	EFCAB7
ENCODE_and_ChEA_Consensus_TFs_from_ChIP-X_	J	YY1_ENCODE	1/2753	1	1	1	1	1	0	THBS3
ENCODE_and_ChEA_Consensus_TFs_from_ChIP-X_	J	ELF1_ENCODE	1/2483	1	1	1	1	1	0	EFCAB7
ENCODE_and_ChEA_Consensus_TFs_from_ChIP-X_	J	NFYB_ENCODE	4/3715	1	1	1	1	1	0	COL1A1;VASH2;EPHB3;APOBEC3B
ENCODE_and_ChEA_Consensus_TFs_from_ChIP-X_	J	TAF1_ENCODE	3/3346	1	1	1	1	1	0	ZNF250;PMAIP1;PHF21A
ENCODE_and_ChEA_Consensus_TFs_from_ChIP-X_	J	BRCA1_ENCODE	3/3218	0.999999	1	1	1	1	0	COL1A1;PHF21A;THBS3
ENCODE_and_ChEA_Consensus_TFs_from_ChIP-X_	J	NFYA_ENCODE	1/2250	0.999999	1	0.999999	1	1	0	VASH2
ENCODE_and_ChEA_Consensus_TFs_from_ChIP-X_	J	GABPA_ENCODE	1/2082	0.999997	1	0.999997	1	1	0	EFCAB7
ENCODE_and_ChEA_Consensus_TFs_from_ChIP-X_	J	MAX_ENCODE	1/2073	0.999996	1	0.999996	1	1	0	MAST2
ENCODE_and_ChEA_Consensus_TFs_from_ChIP-X_	J	BCLAF1_ENCODE	1/851	0.993066	1	0.992847	1	0	0	EFCAB7
ENCODE_and_ChEA_Consensus_TFs_from_ChIP-X_	J	PML_ENCODE	1/1596	0.999926	1	0.999925	1	0	0	PMAIP1
ENCODE_and_ChEA_Consensus_TFs_from_ChIP-X_	J	ATF2_ENCODE	5/2852	0.99985	1	0.999861	1	0	0	ZNF250;MAST2;ITGB8;PMAIP1;EFCAB7
ENCODE_and_ChEA_Consensus_TFs_from_ChIP-X_	J	USF1_ENCODE	1/1423	0.999784	1	0.99978	1	0	0	C1QTNF2
ENCODE_and_ChEA_Consensus_TFs_from_ChIP-X_	J	SPI1_ENCODE	2/1540	0.99889	1	0.998871	1	0	0	C1QTNF2;SLC22A15
ENCODE_and_ChEA_Consensus_TFs_from_ChIP-X_	J	SIX5_ENCODE	1/1094	0.99839	1	0.998341	1	0	0	IGSF9
ENCODE_and_ChEA_Consensus_TFs_from_ChIP-X_	J	E2F6_ENCODE	8/3245	0.998973	1	0.999051	1	0	0	TMSB15A;ZFR2;RASSF8;ITGB8;PMAIP1;EFCAB7;IGSF9;APOBEC3B
ENCODE_and_ChEA_Consensus_TFs_from_ChIP-X_	J	SP2_ENCODE	1/994	0.997057	1	0.996964	1	0	0	ZNF250
ENCODE_and_ChEA_Consensus_TFs_from_ChIP-X_	J	SPI1_CHEA	1/1056	0.997975	1	0.997912	1	0	0	SLC22A15
ENCODE_and_ChEA_Consensus_TFs_from_ChIP-X_	J	UBTF_ENCODE	3/1631	0.996266	1	0.996205	1	0	0	SLC22A15;ARHGEF25;PHF21A
ENCODE_and_ChEA_Consensus_TFs_from_ChIP-X_	J	ZBTB7A_ENCODE	6/2184	0.988634	1	0.988579	1	0	0	CPNE5;CRABP2;ZNF250;ARHGEF25;PHF21A;THBS3
ENCODE_and_ChEA_Consensus_TFs_from_ChIP-X_	J	CREB1_CHEA	3/1444	0.990615	1	0.990403	1	0	0	ZFR2;PMAIP1;SCG2
ENCODE_and_ChEA_Consensus_TFs_from_ChIP-X_	K	SUZ12_CHEA	13/1684	0.000426262	0.0281333	0.000152116	0.0100396	-2	12	EPHA7;CD83;EN2;TBX4;NKD2;GNAO1;OLFM2;GALR1;ADORA1;FLNC;ATF3;WNT3;OPCML
ENCODE_and_ChEA_Consensus_TFs_from_ChIP-X_	K	EZH2_ENCODE	4/338	0.0130564	0.43086	0.0101996	0.336587	-2	8	FRMD5;OLFM2;PKP2;TNFSF9
ENCODE_and_ChEA_Consensus_TFs_from_ChIP-X_	K	FOXA2_ENCODE	3/316	0.0537105	0.99995	0.0450535	0.991177	-2	5	NEDD4L;PLOD2;TBX4
ENCODE_and_ChEA_Consensus_TFs_from_ChIP-X_	K	MYOD1_ENCODE	2/166	0.0740438	0.99995	0.0659085	0.99992	-2	4	IGFN1;WISP1
ENCODE_and_ChEA_Consensus_TFs_from_ChIP-X_	K	EZH2_CHEA	2/237	0.134304	0.99995	0.119858	0.99992	-2	3	FLNC;WNT3
ENCODE_and_ChEA_Consensus_TFs_from_ChIP-X_	K	REST_CHEA	6/1280	0.129609	0.99995	0.097875	0.99992	-1	3	GNAO1;CA3;F12;GALR1;MATN1;NEDD4L
ENCODE_and_ChEA_Consensus_TFs_from_ChIP-X_	K	SOX2_CHEA	4/775	0.156261	0.99995	0.128437	0.99992	-2	3	PBK;NEDD4L;ELOVL6;NR0B1
ENCODE_and_ChEA_Consensus_TFs_from_ChIP-X_	K	AR_CHEA	5/1095	0.17226	0.99995	0.13721	0.99992	-1	2	EPHA7;ANKFN1;GALR1;NEDD4L;OPCML
ENCODE_and_ChEA_Consensus_TFs_from_ChIP-X_	K	TP53_CHEA	2/319	0.212898	0.99995	0.19123	0.99992	-1	2	KCNN4;ATF3
ENCODE_and_ChEA_Consensus_TFs_from_ChIP-X_	K	KAT2A_ENCODE	1/90	0.216412	0.99995	0.204218	0.99992	-1	2	IL4I1
ENCODE_and_ChEA_Consensus_TFs_from_ChIP-X_	K	ZBTB7A_ENCODE	8/2184	0.232692	0.99995	0.172968	0.99992	-1	2	FAM83G;PKP2;NEDD4L;ELOVL6;AK4;GLI1;HGFAC;IER3
ENCODE_and_ChEA_Consensus_TFs_from_ChIP-X_	K	KLF4_CHEA	4/987	0.27613	0.99995	0.233632	0.99992	-1	2	GNAO1;SLC6A7;EN2;ATF3
ENCODE_and_ChEA_Consensus_TFs_from_ChIP-X_	K	TCF3_CHEA	4/1006	0.287688	0.99995	0.24403	0.99992	-1	2	SLC6A7;ELOVL6;NR0B1;WNT3
ENCODE_and_ChEA_Consensus_TFs_from_ChIP-X_	K	CEBPB_ENCODE	1/144	0.323435	0.99995	0.305538	0.99992	-1	1	CHAC1
ENCODE_and_ChEA_Consensus_TFs_from_ChIP-X_	K	GATA2_CHEA	3/772	0.346592	0.99995	0.305842	0.99992	-1	1	OLFM2;ELOVL6;KCNN4
ENCODE_and_ChEA_Consensus_TFs_from_ChIP-X_	K	ETS1_ENCODE	1/156	0.345193	0.99995	0.326284	0.99992	-1	1	IER3
ENCODE_and_ChEA_Consensus_TFs_from_ChIP-X_	K	RELA_ENCODE	2/484	0.377044	0.99995	0.344054	0.99992	-1	1	CD83;IER3
ENCODE_and_ChEA_Consensus_TFs_from_ChIP-X_	K	STAT3_CHEA	1/177	0.381629	0.99995	0.361145	0.99992	-1	1	EPHA7
ENCODE_and_ChEA_Consensus_TFs_from_ChIP-X_	K	SMC3_ENCODE	4/1181	0.396238	0.99995	0.343833	0.99992	-1	1	PCP4;NEDD4L;GLI1;HGFAC
ENCODE_and_ChEA_Consensus_TFs_from_ChIP-X_	K	FOSL2_ENCODE	1/196	0.412876	0.99995	0.391168	0.99992	-1	1	FAM83G
ENCODE_and_ChEA_Consensus_TFs_from_ChIP-X_	K	EGR1_ENCODE	2/537	0.427545	0.99995	0.392148	0.99992	-1	1	NEDD4L;IER3
ENCODE_and_ChEA_Consensus_TFs_from_ChIP-X_	K	FOXA1_ENCODE	1/205	0.427131	0.99995	0.404905	0.99992	-1	1	NEDD4L
ENCODE_and_ChEA_Consensus_TFs_from_ChIP-X_	K	RAD21_ENCODE	4/1265	0.448074	0.99995	0.392872	0.99992	-1	1	PCP4;NEDD4L;GLI1;HGFAC
ENCODE_and_ChEA_Consensus_TFs_from_ChIP-X_	K	TRIM28_CHEA	1/210	0.434903	0.99995	0.412405	0.99992	-1	1	EPHA7
ENCODE_and_ChEA_Consensus_TFs_from_ChIP-X_	K	PBX3_ENCODE	4/1269	0.450517	0.99995	0.395205	0.99992	-1	1	IL4I1;FRMD5;EPHA7;IER3
ENCODE_and_ChEA_Consensus_TFs_from_ChIP-X_	K	STAT5A_ENCODE	1/233	0.469342	0.99995	0.445738	0.99992	-1	1	PBK
ENCODE_and_ChEA_Consensus_TFs_from_ChIP-X_	K	SMAD4_CHEA	2/584	0.470571	0.99995	0.433552	0.99992	-1	1	GNAO1;ANKFN1
ENCODE_and_ChEA_Consensus_TFs_from_ChIP-X_	K	NELFE_ENCODE	1/234	0.470792	0.99995	0.447145	0.99992	-1	1	TNFSF9
ENCODE_and_ChEA_Consensus_TFs_from_ChIP-X_	K	BCL3_ENCODE	1/273	0.524396	0.99995	0.499372	0.99992	-1	0	IER3
ENCODE_and_ChEA_Consensus_TFs_from_ChIP-X_	K	TP63_CHEA	4/1399	0.527868	0.99995	0.470179	0.99992	-1	0	PKP2;ELOVL6;TBX4;IER3
ENCODE_and_ChEA_Consensus_TFs_from_ChIP-X_	K	CTCF_ENCODE	5/1790	0.537016	0.99995	0.471172	0.99992	-1	0	PCP4;NEDD4L;GLI1;HGFAC;NKD2
ENCODE_and_ChEA_Consensus_TFs_from_ChIP-X_	K	RCOR1_ENCODE	2/702	0.569837	0.99995	0.530714	0.99992	-1	0	IL4I1;IER3
ENCODE_and_ChEA_Consensus_TFs_from_ChIP-X_	K	EGR1_CHEA	1/315	0.576167	0.99995	0.550241	0.99992	-1	0	PKP2
ENCODE_and_ChEA_Consensus_TFs_from_ChIP-X_	K	BHLHE40_ENCODE	1/348	0.612926	0.99995	0.586641	0.99992	-1	0	FAM83G
ENCODE_and_ChEA_Consensus_TFs_from_ChIP-X_	K	SALL4_CHEA	1/355	0.620311	0.99995	0.593985	0.99992	0	0	ELOVL6
ENCODE_and_ChEA_Consensus_TFs_from_ChIP-X_	K	REST_ENCODE	1/383	0.648494	0.99995	0.622109	0.99992	0	0	DIRAS1
ENCODE_and_ChEA_Consensus_TFs_from_ChIP-X_	K	GATA1_CHEA	2/807	0.646625	0.99995	0.607633	0.99992	0	0	CD83;KCNN4
ENCODE_and_ChEA_Consensus_TFs_from_ChIP-X_	K	E2F1_CHEA	2/859	0.680566	0.99995	0.642192	0.99992	0	0	IL4I1;NR0B1
ENCODE_and_ChEA_Consensus_TFs_from_ChIP-X_	K	TCF3_ENCODE	2/840	0.668474	0.99995	0.629838	0.99992	0	0	CHAC1;ATF3
ENCODE_and_ChEA_Consensus_TFs_from_ChIP-X_	K	ZMIZ1_ENCODE	2/914	0.713599	0.99995	0.676196	0.99992	0	0	CHAC1;IER3
ENCODE_and_ChEA_Consensus_TFs_from_ChIP-X_	K	NFE2L2_CHEA	2/1022	0.77034	0.99995	0.735562	0.99992	0	0	GALR1;OPCML
ENCODE_and_ChEA_Consensus_TFs_from_ChIP-X_	K	NANOG_CHEA	1/595	0.804673	0.99995	0.781507	0.99992	0	0	NR0B1
ENCODE_and_ChEA_Consensus_TFs_from_ChIP-X_	K	SPI1_CHEA	2/1056	0.786111	0.99995	0.752305	0.99992	0	0	ELOVL6;FLNC
ENCODE_and_ChEA_Consensus_TFs_from_ChIP-X_	K	SIN3A_ENCODE	2/1131	0.817644	0.99995	0.786142	0.99992	0	0	PBK;IER3
ENCODE_and_ChEA_Consensus_TFs_from_ChIP-X_	K	FOS_ENCODE	1/637	0.826268	0.99995	0.80416	0.99992	0	0	FRMD5
ENCODE_and_ChEA_Consensus_TFs_from_ChIP-X_	K	SP1_ENCODE	1/707	0.857168	0.99995	0.836928	0.99992	0	0	GLI1
ENCODE_and_ChEA_Consensus_TFs_from_ChIP-X_	K	E2F4_ENCODE	1/710	0.858364	0.99995	0.838206	0.99992	0	0	PBK
ENCODE_and_ChEA_Consensus_TFs_from_ChIP-X_	K	HNF4A_ENCODE	2/1276	0.867261	0.99995	0.840523	0.99992	0	0	F12;TBX4
ENCODE_and_ChEA_Consensus_TFs_from_ChIP-X_	K	CEBPD_ENCODE	1/734	0.867585	0.99995	0.848084	0.99992	0	0	TNFSF9
ENCODE_and_ChEA_Consensus_TFs_from_ChIP-X_	K	TAF1_ENCODE	1/3346	0.99995	0.99995	0.99992	0.99992	1	0	IL4I1
ENCODE_and_ChEA_Consensus_TFs_from_ChIP-X_	K	NFYB_ENCODE	2/3715	0.999801	0.99995	0.999679	0.99992	1	0	FRMD5;CHAC1
ENCODE_and_ChEA_Consensus_TFs_from_ChIP-X_	K	BRCA1_ENCODE	2/3218	0.999136	0.99995	0.998659	0.99992	1	0	FAM83G;IL4I1
ENCODE_and_ChEA_Consensus_TFs_from_ChIP-X_	K	MAX_ENCODE	1/2073	0.997307	0.99995	0.996192	0.99992	1	0	IL4I1
ENCODE_and_ChEA_Consensus_TFs_from_ChIP-X_	K	NRF1_ENCODE	1/1882	0.995224	0.99995	0.993415	0.99992	1	0	IL4I1
ENCODE_and_ChEA_Consensus_TFs_from_ChIP-X_	K	SPI1_ENCODE	1/1540	0.986869	0.99995	0.982773	0.99992	0	0	TNFSF9
ENCODE_and_ChEA_Consensus_TFs_from_ChIP-X_	K	USF1_ENCODE	1/1423	0.981521	0.99995	0.976189	0.99992	0	0	FAM83G
ENCODE_and_ChEA_Consensus_TFs_from_ChIP-X_	K	MYC_ENCODE	1/1515	0.985872	0.99995	0.981535	0.99992	0	0	IL4I1
ENCODE_and_ChEA_Consensus_TFs_from_ChIP-X_	K	NFYA_ENCODE	2/2250	0.987616	0.99995	0.98275	0.99992	0	0	FRMD5;CHAC1
ENCODE_and_ChEA_Consensus_TFs_from_ChIP-X_	K	ATF2_ENCODE	3/2852	0.987862	0.99995	0.982402	0.99992	1	0	IL4I1;ELOVL6;GLI1
ENCODE_and_ChEA_Consensus_TFs_from_ChIP-X_	K	USF2_ENCODE	1/965	0.93103	0.99995	0.917585	0.99992	0	0	FAM83G
ENCODE_and_ChEA_Consensus_TFs_from_ChIP-X_	K	PML_ENCODE	2/1596	0.936534	0.99995	0.919698	0.99992	0	0	IL4I1;IER3
ENCODE_and_ChEA_Consensus_TFs_from_ChIP-X_	K	SP2_ENCODE	1/994	0.936489	0.99995	0.923728	0.99992	0	0	FRMD5
ENCODE_and_ChEA_Consensus_TFs_from_ChIP-X_	K	RUNX1_CHEA	2/1294	0.872493	0.99995	0.846352	0.99992	0	0	ELOVL6;GLI1
ENCODE_and_ChEA_Consensus_TFs_from_ChIP-X_	K	E2F6_ENCODE	5/3245	0.951552	0.99995	0.931342	0.99992	0	0	FAM83G;IL4I1;EN2;PBK;ULBP1
ENCODE_and_ChEA_Consensus_TFs_from_ChIP-X_	K	UBTF_ENCODE	2/1631	0.941615	0.99995	0.925719	0.99992	0	0	NEDD4L;ELOVL6
ENCODE_and_ChEA_Consensus_TFs_from_ChIP-X_	K	CREB1_CHEA	2/1444	0.909363	0.99995	0.888071	0.99992	0	0	FRMD5;CHAC1
GO_Biological_Process_2018_	A	fatty acid derivative biosynthetic process (GO:1901570)	7/25	4.87832e-11	5.08321e-08	8.21705e-10	8.56217e-07	-3	60	ACLY;BDH1;SCD;FASN;AACS;ACACA;FADS1
GO_Biological_Process_2018_	A	acyl-CoA biosynthetic process (GO:0071616)	4/15	1.04843e-06	0.000182078	4.97806e-06	0.000864524	-3	37	ACLY;SCD;FASN;ACACA
GO_Biological_Process_2018_	A	fatty-acyl-CoA metabolic process (GO:0035337)	4/20	3.64471e-06	0.000421977	1.33278e-05	0.00154306	-2	29	ACLY;SCD;FASN;ACACA
GO_Biological_Process_2018_	A	zinc ion homeostasis (GO:0055069)	5/32	7.49928e-07	0.000159536	3.04544e-06	0.00063467	-2	26	MT1A;MT1M;MT1X;MT1B;SLC39A14
GO_Biological_Process_2018_	A	cellular response to zinc ion (GO:0071294)	4/20	3.64471e-06	0.000421977	1.33278e-05	0.00154306	-2	26	MT1A;MT1M;MT1X;MT1B
GO_Biological_Process_2018_	A	fatty-acyl-CoA biosynthetic process (GO:0046949)	5/31	6.35474e-07	0.000159536	2.64677e-06	0.00063467	-2	26	ACLY;ACSL1;SCD;FASN;ACACA
GO_Biological_Process_2018_	A	cellular zinc ion homeostasis (GO:0006882)	5/32	7.49928e-07	0.000159536	3.04544e-06	0.00063467	-2	25	MT1A;MT1M;MT1X;MT1B;SLC39A14
GO_Biological_Process_2018_	A	response to copper ion (GO:0046688)	4/26	1.09691e-05	0.00103908	3.34103e-05	0.00316487	-2	24	MT1A;MT1M;MT1X;MT1B
GO_Biological_Process_2018_	A	cellular transition metal ion homeostasis (GO:0046916)	7/94	7.65528e-07	0.000159536	2.97187e-06	0.00063467	-2	22	TF;MT1A;MT1M;MT1X;MT1B;HAMP;SLC39A14
GO_Biological_Process_2018_	A	response to zinc ion (GO:0010043)	4/33	2.91631e-05	0.00189925	7.78953e-05	0.00507293	-2	21	MT1A;MT1M;MT1X;MT1B
GO_Biological_Process_2018_	A	cellular response to cadmium ion (GO:0071276)	4/30	1.97761e-05	0.00147191	5.54786e-05	0.00412919	-2	21	MT1A;MT1M;MT1X;MT1B
GO_Biological_Process_2018_	A	positive regulation of metabolic process (GO:0009893)	3/19	0.000139329	0.00659911	0.000325443	0.0154142	-2	20	ACLY;FASN;ACACA
GO_Biological_Process_2018_	A	long-chain fatty acid import (GO:0044539)	2/8	0.000791977	0.0294728	0.0016547	0.0596311	-3	19	ACSL1;SLC27A2
GO_Biological_Process_2018_	A	regulation of alcohol biosynthetic process (GO:1902930)	4/35	3.70076e-05	0.00226835	9.60964e-05	0.00589014	-2	19	SCD;FASN;DHCR7;ACACA
GO_Biological_Process_2018_	A	cellular response to copper ion (GO:0071280)	4/22	5.4572e-06	0.00056864	1.85744e-05	0.00193545	-2	19	MT1A;MT1M;MT1X;MT1B
GO_Biological_Process_2018_	A	ketone body biosynthetic process (GO:0046951)	2/9	0.00101467	0.0338985	0.00201427	0.0655897	-3	19	BDH1;AACS
GO_Biological_Process_2018_	A	cellular divalent inorganic cation homeostasis (GO:0072503)	6/102	1.90666e-05	0.00147191	5.51804e-05	0.00412919	-2	19	MT1A;MT1M;CCL3;MT1X;MT1B;SLC39A14
GO_Biological_Process_2018_	A	regulation of steroid biosynthetic process (GO:0050810)	4/45	0.000101028	0.00526357	0.000236123	0.012302	-2	18	SCD;FASN;DHCR7;ACACA
GO_Biological_Process_2018_	A	camera-type eye morphogenesis (GO:0048593)	2/12	0.00184063	0.0533333	0.00329266	0.0953041	-3	18	TENM3;VEGFA
GO_Biological_Process_2018_	A	fatty acid metabolic process (GO:0006631)	7/107	1.84134e-06	0.000274096	6.66187e-06	0.000991667	-1	17	ACLY;ACSL1;FASN;LPIN1;SLC27A2;ADIPOR2;ACACA
GO_Biological_Process_2018_	A	response to cadmium ion (GO:0046686)	4/32	2.57349e-05	0.00178772	6.98034e-05	0.00484901	-2	17	MT1A;MT1M;MT1X;MT1B
GO_Biological_Process_2018_	A	regulation of cholesterol biosynthetic process (GO:0045540)	4/41	6.98163e-05	0.00404159	0.000169211	0.00979543	-2	17	SCD;FASN;DHCR7;ACACA
GO_Biological_Process_2018_	A	positive regulation of branching involved in ureteric bud morphogenesis (GO:0090190)	2/13	0.00216764	0.0579149	0.00378395	0.101099	-3	16	PAX8;VEGFA
GO_Biological_Process_2018_	A	regulation of cholesterol metabolic process (GO:0090181)	4/42	7.6846e-05	0.0042144	0.000184453	0.0101158	-2	16	SCD;FASN;DHCR7;ACACA
GO_Biological_Process_2018_	A	cardiac muscle fiber development (GO:0048739)	2/13	0.00216764	0.0579149	0.00378395	0.101099	-3	16	MYH11;VEGFA
GO_Biological_Process_2018_	A	alpha-linolenic acid metabolic process (GO:0036109)	2/14	0.00252002	0.0610665	0.00430715	0.104457	-3	16	ACSL1;FADS1
GO_Biological_Process_2018_	A	acetyl-CoA metabolic process (GO:0006084)	2/15	0.00289749	0.0642379	0.00486184	0.109162	-3	15	ACLY;ACACA
GO_Biological_Process_2018_	A	ketone body metabolic process (GO:1902224)	2/11	0.00153928	0.0471745	0.00283367	0.0868436	-2	15	BDH1;AACS
GO_Biological_Process_2018_	A	regulation of branching involved in ureteric bud morphogenesis (GO:0090189)	2/16	0.00329977	0.0660539	0.00544763	0.109162	-3	15	PAX8;VEGFA
GO_Biological_Process_2018_	A	response to iron ion (GO:0010039)	2/14	0.00252002	0.0610665	0.00430715	0.104457	-2	15	TF;HAMP
GO_Biological_Process_2018_	A	long-chain fatty acid transport (GO:0015909)	3/26	0.000363702	0.0157907	0.000748353	0.032491	-2	15	ACSL1;SLC27A2;ACACA
GO_Biological_Process_2018_	A	coenzyme metabolic process (GO:0006732)	3/52	0.00279236	0.0642379	0.00478475	0.109162	-2	14	ACLY;FASN;MOCOS
GO_Biological_Process_2018_	A	cellular response to metal ion (GO:0071248)	6/101	1.80234e-05	0.00147191	5.23732e-05	0.00412919	-1	14	TF;MT1A;MT1M;PPIF;MT1X;MT1B
GO_Biological_Process_2018_	A	regulation of developmental growth (GO:0048638)	3/31	0.00061657	0.0256986	0.00119844	0.0499512	-2	14	MUSK;NRCAM;IGF1
GO_Biological_Process_2018_	A	negative regulation of ATPase activity (GO:0032780)	2/13	0.00216764	0.0579149	0.00378395	0.101099	-2	14	PLN;PPIF
GO_Biological_Process_2018_	A	positive regulation of cellular metabolic process (GO:0031325)	5/93	0.000149059	0.006753	0.000352643	0.0159763	-2	13	ACLY;PAX8;FASN;ACACA;VEGFA
GO_Biological_Process_2018_	A	unsaturated fatty acid biosynthetic process (GO:0006636)	2/16	0.00329977	0.0660539	0.00544763	0.109162	-2	13	SCD;FADS1
GO_Biological_Process_2018_	A	apoptotic mitochondrial changes (GO:0008637)	3/35	0.000883799	0.0317558	0.0016596	0.0596311	-2	13	GGCT;PPIF;HK2
GO_Biological_Process_2018_	A	linoleic acid metabolic process (GO:0043651)	2/17	0.00372661	0.0693415	0.00606411	0.114887	-2	13	ACSL1;FADS1
GO_Biological_Process_2018_	A	inactivation of MAPK activity (GO:0000188)	2/21	0.00567395	0.0856849	0.00882915	0.135294	-2	13	DUSP4;DUSP2
GO_Biological_Process_2018_	A	negative regulation of release of cytochrome c from mitochondria (GO:0090201)	2/16	0.00329977	0.0660539	0.00544763	0.109162	-2	13	PPIF;IGF1
GO_Biological_Process_2018_	A	positive regulation of morphogenesis of an epithelium (GO:1905332)	2/19	0.00465281	0.0820644	0.00738758	0.13505	-2	13	PAX8;VEGFA
GO_Biological_Process_2018_	A	neurotransmitter transport (GO:0006836)	2/17	0.00372661	0.0693415	0.00606411	0.114887	-2	13	SLC1A3;GLUL
GO_Biological_Process_2018_	A	chemical homeostasis within a tissue (GO:0048875)	1/7	0.0371986	0.221518	0.0485259	0.278097	-4	12	VEGFA
GO_Biological_Process_2018_	A	fatty acid biosynthetic process (GO:0006633)	4/48	0.000130307	0.00646572	0.000297467	0.01476	-1	12	ACLY;SCD;ACACA;FADS1
GO_Biological_Process_2018_	A	centromeric sister chromatid cohesion (GO:0070601)	1/7	0.0371986	0.221518	0.0485259	0.278097	-4	12	NAA50
GO_Biological_Process_2018_	A	positive regulation of mesonephros development (GO:0061213)	2/16	0.00329977	0.0660539	0.00544763	0.109162	-2	12	PAX8;VEGFA
GO_Biological_Process_2018_	A	positive regulation of axon guidance (GO:1902669)	1/7	0.0371986	0.221518	0.0485259	0.278097	-4	12	VEGFA
GO_Biological_Process_2018_	A	endoderm development (GO:0007492)	2/16	0.00329977	0.0660539	0.00544763	0.109162	-2	12	DUSP4;DUSP2
GO_Biological_Process_2018_	A	proteoglycan metabolic process (GO:0006029)	2/21	0.00567395	0.0856849	0.00882915	0.135294	-2	12	FOXL1;IGF1
GO_Biological_Process_2018_	A	endoderm formation (GO:0001706)	3/37	0.00104103	0.0338985	0.0019264	0.0647519	-2	12	DUSP4;DUSP2;LAMB3
GO_Biological_Process_2018_	A	response to nutrient levels (GO:0031667)	2/19	0.00465281	0.0820644	0.00738758	0.13505	-2	12	KCNB1;IGF1
GO_Biological_Process_2018_	A	organophosphate biosynthetic process (GO:0090407)	3/37	0.00104103	0.0338985	0.0019264	0.0647519	-2	11	MOCOS;IP6K3;FADS1
GO_Biological_Process_2018_	A	acylglycerol biosynthetic process (GO:0046463)	2/20	0.00515165	0.0825849	0.00809379	0.135294	-2	11	MOGAT2;LPIN1
GO_Biological_Process_2018_	A	negative regulation of systemic arterial blood pressure (GO:0003085)	1/7	0.0371986	0.221518	0.0485259	0.278097	-3	11	ADRB3
GO_Biological_Process_2018_	A	regulation of histone deacetylase activity (GO:1901725)	1/7	0.0371986	0.221518	0.0485259	0.278097	-3	11	VEGFA
GO_Biological_Process_2018_	A	regulation of calcium ion import (GO:0090279)	2/23	0.00678792	0.0982363	0.0103858	0.150305	-2	11	PLN;CCL3
GO_Biological_Process_2018_	A	unsaturated fatty acid metabolic process (GO:0033559)	3/45	0.00184261	0.0533333	0.00325423	0.0953041	-2	11	ACSL1;SCD;FADS1
GO_Biological_Process_2018_	A	camera-type eye development (GO:0043010)	2/25	0.00799264	0.105422	0.0120544	0.163769	-2	11	TENM3;VEGFA
GO_Biological_Process_2018_	A	cyclic nucleotide metabolic process (GO:0009187)	2/26	0.00862838	0.109428	0.0129298	0.166332	-2	11	ADCY2;PDE8B
GO_Biological_Process_2018_	A	negative regulation of growth (GO:0045926)	4/121	0.00421072	0.076975	0.0075621	0.135294	-2	11	MT1A;MT1M;MT1X;MT1B
GO_Biological_Process_2018_	A	organic hydroxy compound biosynthetic process (GO:1901617)	3/50	0.00249589	0.0610665	0.0043106	0.104457	-2	11	PSAT1;DHCR7;SLC27A2
GO_Biological_Process_2018_	A	positive regulation of cell migration by vascular endothelial growth factor signaling pathway (GO:0038089)	1/8	0.0423996	0.221518	0.0544255	0.278097	-3	11	VEGFA
GO_Biological_Process_2018_	A	triglyceride biosynthetic process (GO:0019432)	2/20	0.00515165	0.0825849	0.00809379	0.135294	-2	11	MOGAT2;LPIN1
GO_Biological_Process_2018_	A	amino acid transport (GO:0006865)	3/49	0.00235531	0.0610665	0.00408473	0.104457	-2	11	SLC6A8;SLC36A2;SLC16A10
GO_Biological_Process_2018_	A	zinc II ion transmembrane import (GO:0071578)	1/8	0.0423996	0.221518	0.0544255	0.278097	-3	10	SLC39A14
GO_Biological_Process_2018_	A	regulation of positive chemotaxis (GO:0050926)	1/9	0.0475727	0.221518	0.0602889	0.278097	-3	10	VEGFA
GO_Biological_Process_2018_	A	regulation of norepinephrine secretion (GO:0014061)	1/8	0.0423996	0.221518	0.0544255	0.278097	-3	10	KCNB1
GO_Biological_Process_2018_	A	positive regulation of hormone metabolic process (GO:0032352)	1/7	0.0371986	0.221518	0.0485259	0.278097	-3	10	PAX8
GO_Biological_Process_2018_	A	regulated exocytosis (GO:0045055)	4/149	0.00871645	0.109428	0.0150358	0.186515	-2	10	TF;IGF1;F5;VEGFA
GO_Biological_Process_2018_	A	lipid hydroxylation (GO:0002933)	1/7	0.0371986	0.221518	0.0485259	0.278097	-3	10	CYP3A5
GO_Biological_Process_2018_	A	citrate metabolic process (GO:0006101)	1/7	0.0371986	0.221518	0.0485259	0.278097	-3	10	ACLY
GO_Biological_Process_2018_	A	positive regulation of deacetylase activity (GO:0090045)	1/7	0.0371986	0.221518	0.0485259	0.278097	-3	10	VEGFA
GO_Biological_Process_2018_	A	lipid biosynthetic process (GO:0008610)	4/73	0.00065728	0.0263418	0.00132186	0.0529762	-1	10	ACLY;ACSL1;ACACA;FADS1
GO_Biological_Process_2018_	A	response to gonadotropin (GO:0034698)	1/7	0.0371986	0.221518	0.0485259	0.278097	-3	10	PAX8
GO_Biological_Process_2018_	A	L-amino acid transport (GO:0015807)	2/26	0.00862838	0.109428	0.0129298	0.166332	-2	10	SLC36A2;SLC1A3
GO_Biological_Process_2018_	A	monocarboxylic acid biosynthetic process (GO:0072330)	3/69	0.00619603	0.0912772	0.0100874	0.149092	-2	10	ACLY;SLC27A2;ACACA
GO_Biological_Process_2018_	A	positive regulation of metanephros development (GO:0072216)	1/9	0.0475727	0.221518	0.0602889	0.278097	-3	10	PAX8
GO_Biological_Process_2018_	A	eye morphogenesis (GO:0048592)	2/21	0.00567395	0.0856849	0.00882915	0.135294	-2	10	TENM3;VEGFA
GO_Biological_Process_2018_	A	regulation of translational initiation (GO:0006446)	3/63	0.00480702	0.0821133	0.0079481	0.135294	-2	10	EIF5;EIF4EBP1;EIF4G2
GO_Biological_Process_2018_	A	kidney epithelium development (GO:0072073)	1/8	0.0423996	0.221518	0.0544255	0.278097	-3	10	PAX8
GO_Biological_Process_2018_	A	oxaloacetate metabolic process (GO:0006107)	1/8	0.0423996	0.221518	0.0544255	0.278097	-3	10	ACLY
GO_Biological_Process_2018_	A	negative regulation of muscle cell apoptotic process (GO:0010656)	1/7	0.0371986	0.221518	0.0485259	0.278097	-3	10	IGF1
GO_Biological_Process_2018_	A	lipid catabolic process (GO:0016042)	2/22	0.00621947	0.0912772	0.00959326	0.144872	-2	9	CYP1A2;CES4A
GO_Biological_Process_2018_	A	positive regulation of catecholamine secretion (GO:0033605)	1/7	0.0371986	0.221518	0.0485259	0.278097	-3	9	KCNB1
GO_Biological_Process_2018_	A	monocarboxylic acid metabolic process (GO:0032787)	4/109	0.00289658	0.0642379	0.00531335	0.109162	-2	9	FASN;CYP1A2;IGF1;ACACA
GO_Biological_Process_2018_	A	molybdopterin cofactor metabolic process (GO:0043545)	1/8	0.0423996	0.221518	0.0544255	0.278097	-3	9	MOCOS
GO_Biological_Process_2018_	A	regulation of relaxation of cardiac muscle (GO:1901897)	1/7	0.0371986	0.221518	0.0485259	0.278097	-3	9	PLN
GO_Biological_Process_2018_	A	positive regulation of neuroblast proliferation (GO:0002052)	1/8	0.0423996	0.221518	0.0544255	0.278097	-3	9	VEGFA
GO_Biological_Process_2018_	A	positive regulation of smooth muscle cell migration (GO:0014911)	1/11	0.057836	0.221518	0.0719081	0.278097	-3	9	IGF1
GO_Biological_Process_2018_	A	terpenoid metabolic process (GO:0006721)	1/8	0.0423996	0.221518	0.0544255	0.278097	-3	9	CYP1A2
GO_Biological_Process_2018_	A	negative regulation of calcium ion import (GO:0090281)	1/8	0.0423996	0.221518	0.0544255	0.278097	-3	9	PLN
GO_Biological_Process_2018_	A	acetyl-CoA biosynthetic process (GO:0006085)	1/7	0.0371986	0.221518	0.0485259	0.278097	-3	9	ACLY
GO_Biological_Process_2018_	A	cardiac muscle cell development (GO:0055013)	2/28	0.00996538	0.120743	0.014761	0.185313	-2	9	MYH11;VEGFA
GO_Biological_Process_2018_	A	positive regulation of protein import into nucleus, translocation (GO:0033160)	1/7	0.0371986	0.221518	0.0485259	0.278097	-3	9	IGF1
GO_Biological_Process_2018_	A	proteoglycan biosynthetic process (GO:0030166)	2/25	0.00799264	0.105422	0.0120544	0.163769	-2	9	FOXL1;IGF1
GO_Biological_Process_2018_	A	regulation of cellular metabolic process (GO:0031323)	3/42	0.0015083	0.0471745	0.00270576	0.0854363	-1	9	ACLY;FASN;ACACA
GO_Biological_Process_2018_	A	granulocyte migration (GO:0097530)	1/8	0.0423996	0.221518	0.0544255	0.278097	-3	9	CCL3
GO_Biological_Process_2018_	A	pronephros development (GO:0048793)	1/7	0.0371986	0.221518	0.0485259	0.278097	-3	9	PAX8
GO_Biological_Process_2018_	A	regulation of cardiac muscle cell membrane potential (GO:0086036)	1/8	0.0423996	0.221518	0.0544255	0.278097	-3	9	PLN
GO_Biological_Process_2018_	A	negative regulation of cell cycle phase transition (GO:1901988)	1/7	0.0371986	0.221518	0.0485259	0.278097	-3	9	ATF5
GO_Biological_Process_2018_	A	muscle fiber development (GO:0048747)	2/28	0.00996538	0.120743	0.014761	0.185313	-2	9	MYH11;VEGFA
GO_Biological_Process_2018_	A	vascular smooth muscle cell development (GO:0097084)	1/7	0.0371986	0.221518	0.0485259	0.278097	-3	9	VEGFA
GO_Biological_Process_2018_	A	negative regulation of ion transport (GO:0043271)	2/21	0.00567395	0.0856849	0.00882915	0.135294	-2	9	PLN;PPIF
GO_Biological_Process_2018_	A	drug catabolic process (GO:0042737)	2/25	0.00799264	0.105422	0.0120544	0.163769	-2	9	CYP1A2;CYP3A5
GO_Biological_Process_2018_	A	glucose homeostasis (GO:0042593)	4/75	0.000727949	0.0280934	0.0014539	0.0561099	-1	9	KCNB1;IGF1;ADIPOR2;HK2
GO_Biological_Process_2018_	A	negative regulation of calcium ion transmembrane transport (GO:1903170)	1/9	0.0475727	0.221518	0.0602889	0.278097	-3	9	PLN
GO_Biological_Process_2018_	A	heterotypic cell-cell adhesion (GO:0034113)	2/26	0.00862838	0.109428	0.0129298	0.166332	-2	9	ITGAX;PARVA
GO_Biological_Process_2018_	A	release of sequestered calcium ion into cytosol by sarcoplasmic reticulum (GO:0014808)	1/7	0.0371986	0.221518	0.0485259	0.278097	-3	9	CCL3
GO_Biological_Process_2018_	A	positive regulation of autophagy of mitochondrion (GO:1903599)	1/8	0.0423996	0.221518	0.0544255	0.278097	-3	9	HK2
GO_Biological_Process_2018_	A	regulation of cellular biosynthetic process (GO:0031326)	2/30	0.0113881	0.134845	0.016697	0.197708	-2	9	PRG2;ADIPOR2
GO_Biological_Process_2018_	A	omega-hydroxylase P450 pathway (GO:0097267)	1/10	0.0527181	0.221518	0.0661164	0.278097	-3	9	CYP1A2
GO_Biological_Process_2018_	A	coronary vasculature morphogenesis (GO:0060977)	1/9	0.0475727	0.221518	0.0602889	0.278097	-3	9	VEGFA
GO_Biological_Process_2018_	A	cellular response to gonadotropin stimulus (GO:0071371)	1/8	0.0423996	0.221518	0.0544255	0.278097	-3	9	PAX8
GO_Biological_Process_2018_	A	positive regulation of protein kinase C signaling (GO:0090037)	1/8	0.0423996	0.221518	0.0544255	0.278097	-3	9	VEGFA
GO_Biological_Process_2018_	A	regulation of peptide hormone secretion (GO:0090276)	3/74	0.00751858	0.103084	0.0121019	0.163769	-2	9	PAX8;KCNB1;RASL10B
GO_Biological_Process_2018_	A	negative regulation of transporter activity (GO:0032410)	1/8	0.0423996	0.221518	0.0544255	0.278097	-3	9	PPIF
GO_Biological_Process_2018_	A	carboxylic acid transmembrane transport (GO:1905039)	2/36	0.0161508	0.171725	0.0231059	0.245677	-2	8	SLC36A2;SLC16A7
GO_Biological_Process_2018_	A	regulation of cyclic nucleotide metabolic process (GO:0030799)	1/8	0.0423996	0.221518	0.0544255	0.278097	-3	8	VEGFA
GO_Biological_Process_2018_	A	endothelial cell chemotaxis (GO:0035767)	1/10	0.0527181	0.221518	0.0661164	0.278097	-3	8	VEGFA
GO_Biological_Process_2018_	A	long-chain fatty acid metabolic process (GO:0001676)	3/56	0.00344824	0.0665383	0.00582458	0.114513	-1	8	ACSL1;SLC27A2;FADS1
GO_Biological_Process_2018_	A	positive regulation of blood vessel endothelial cell proliferation involved in sprouting angiogenesis (GO:1903589)	1/8	0.0423996	0.221518	0.0544255	0.278097	-3	8	VEGFA
GO_Biological_Process_2018_	A	positive regulation of adenylate cyclase activity (GO:0045762)	2/34	0.0144827	0.162268	0.0208722	0.233859	-2	8	ADRB3;ADCY2
GO_Biological_Process_2018_	A	regulation of smooth muscle cell apoptotic process (GO:0034391)	1/9	0.0475727	0.221518	0.0602889	0.278097	-3	8	IGF1
GO_Biological_Process_2018_	A	surfactant homeostasis (GO:0043129)	1/7	0.0371986	0.221518	0.0485259	0.278097	-3	8	VEGFA
GO_Biological_Process_2018_	A	vascular endothelial growth factor signaling pathway (GO:0038084)	1/8	0.0423996	0.221518	0.0544255	0.278097	-3	8	VEGFA
GO_Biological_Process_2018_	A	DNA dealkylation involved in DNA repair (GO:0006307)	1/11	0.057836	0.221518	0.0719081	0.278097	-3	8	ASCC2
GO_Biological_Process_2018_	A	substrate adhesion-dependent cell spreading (GO:0034446)	2/33	0.0136785	0.158366	0.0197914	0.22914	-2	8	PARVA;SRCIN1
GO_Biological_Process_2018_	A	angiogenesis involved in wound healing (GO:0060055)	1/9	0.0475727	0.221518	0.0602889	0.278097	-3	8	ADIPOR2
GO_Biological_Process_2018_	A	regulation of sensory perception (GO:0051931)	1/9	0.0475727	0.221518	0.0602889	0.278097	-3	8	CCL3
GO_Biological_Process_2018_	A	negative regulation of digestive system process (GO:0060457)	1/7	0.0371986	0.221518	0.0485259	0.278097	-2	8	HAMP
GO_Biological_Process_2018_	A	carboxylic acid transport (GO:0046942)	3/52	0.00279236	0.0642379	0.00478475	0.109162	-1	8	SLC36A2;SLC16A7;SLC16A10
GO_Biological_Process_2018_	A	negative regulation of membrane protein ectodomain proteolysis (GO:0051045)	1/8	0.0423996	0.221518	0.0544255	0.278097	-3	8	PTPN3
GO_Biological_Process_2018_	A	negative regulation of platelet aggregation (GO:0090331)	1/9	0.0475727	0.221518	0.0602889	0.278097	-3	8	C1QTNF1
GO_Biological_Process_2018_	A	cellular glucose homeostasis (GO:0001678)	2/34	0.0144827	0.162268	0.0208722	0.233859	-2	8	KCNB1;HK2
GO_Biological_Process_2018_	A	positive regulation of insulin-like growth factor receptor signaling pathway (GO:0043568)	1/8	0.0423996	0.221518	0.0544255	0.278097	-2	8	IGF1
GO_Biological_Process_2018_	A	negative regulation of response to reactive oxygen species (GO:1901032)	1/10	0.0527181	0.221518	0.0661164	0.278097	-3	8	GPR37
GO_Biological_Process_2018_	A	secondary alcohol biosynthetic process (GO:1902653)	2/37	0.0170142	0.177288	0.0242582	0.25277	-2	8	ACLY;DHCR7
GO_Biological_Process_2018_	A	acidic amino acid transport (GO:0015800)	1/10	0.0527181	0.221518	0.0661164	0.278097	-3	8	SLC1A3
GO_Biological_Process_2018_	A	negative regulation of homotypic cell-cell adhesion (GO:0034111)	1/11	0.057836	0.221518	0.0719081	0.278097	-3	8	C1QTNF1
GO_Biological_Process_2018_	A	skeletal muscle myosin thick filament assembly (GO:0030241)	1/8	0.0423996	0.221518	0.0544255	0.278097	-2	8	MYH11
GO_Biological_Process_2018_	A	smooth muscle cell migration (GO:0014909)	1/8	0.0423996	0.221518	0.0544255	0.278097	-2	8	PARVA
GO_Biological_Process_2018_	A	venous blood vessel morphogenesis (GO:0048845)	1/7	0.0371986	0.221518	0.0485259	0.278097	-2	8	VEGFA
GO_Biological_Process_2018_	A	protein kinase B signaling (GO:0043491)	2/36	0.0161508	0.171725	0.0231059	0.245677	-2	8	CCL3;IGF1
GO_Biological_Process_2018_	A	L-amino acid import (GO:0043092)	1/7	0.0371986	0.221518	0.0485259	0.278097	-2	8	SLC1A3
GO_Biological_Process_2018_	A	cellular iron ion homeostasis (GO:0006879)	2/57	0.0380356	0.221518	0.0517479	0.278097	-2	8	TF;HAMP
GO_Biological_Process_2018_	A	elastic fiber assembly (GO:0048251)	1/8	0.0423996	0.221518	0.0544255	0.278097	-2	8	MYH11
GO_Biological_Process_2018_	A	L-alanine transport (GO:0015808)	1/8	0.0423996	0.221518	0.0544255	0.278097	-2	8	SLC36A2
GO_Biological_Process_2018_	A	positive regulation of vasculature development (GO:1904018)	3/105	0.019287	0.193241	0.0294705	0.278097	-2	8	ANGPTL4;HK2;VEGFA
GO_Biological_Process_2018_	A	glutamate catabolic process (GO:0006538)	1/7	0.0371986	0.221518	0.0485259	0.278097	-2	8	GLUL
GO_Biological_Process_2018_	A	metanephric nephron tubule development (GO:0072234)	1/8	0.0423996	0.221518	0.0544255	0.278097	-2	8	PAX8
GO_Biological_Process_2018_	A	regulation of natural killer cell chemotaxis (GO:2000501)	1/8	0.0423996	0.221518	0.0544255	0.278097	-2	8	CCL3
GO_Biological_Process_2018_	A	monoterpenoid metabolic process (GO:0016098)	1/7	0.0371986	0.221518	0.0485259	0.278097	-2	8	CYP1A2
GO_Biological_Process_2018_	A	positive regulation of epithelial cell differentiation involved in kidney development (GO:2000698)	1/8	0.0423996	0.221518	0.0544255	0.278097	-2	7	PAX8
GO_Biological_Process_2018_	A	fatty acid alpha-oxidation (GO:0001561)	1/9	0.0475727	0.221518	0.0602889	0.278097	-2	7	SLC27A2
GO_Biological_Process_2018_	A	DNA dealkylation (GO:0035510)	1/11	0.057836	0.221518	0.0719081	0.278097	-3	7	ASCC2
GO_Biological_Process_2018_	A	platelet degranulation (GO:0002576)	4/125	0.0047254	0.0820644	0.00843194	0.135294	-1	7	TF;IGF1;F5;VEGFA
GO_Biological_Process_2018_	A	cellular response to iron ion (GO:0071281)	1/7	0.0371986	0.221518	0.0485259	0.278097	-2	7	TF
GO_Biological_Process_2018_	A	cell differentiation involved in metanephros development (GO:0072202)	1/11	0.057836	0.221518	0.0719081	0.278097	-3	7	PAX8
GO_Biological_Process_2018_	A	positive regulation of calcium-mediated signaling (GO:0050850)	2/29	0.0106661	0.127748	0.0157161	0.190421	-2	7	CCL3;IGF1
GO_Biological_Process_2018_	A	release of sequestered calcium ion into cytosol by endoplasmic reticulum (GO:1903514)	1/8	0.0423996	0.221518	0.0544255	0.278097	-2	7	CCL3
GO_Biological_Process_2018_	A	mesenchymal to epithelial transition involved in metanephros morphogenesis (GO:0003337)	1/7	0.0371986	0.221518	0.0485259	0.278097	-2	7	PAX8
GO_Biological_Process_2018_	A	positive regulation of receptor-mediated endocytosis (GO:0048260)	2/42	0.0216158	0.202916	0.0303599	0.278097	-2	7	TF;VEGFA
GO_Biological_Process_2018_	A	insulin-like growth factor receptor signaling pathway (GO:0048009)	1/11	0.057836	0.221518	0.0719081	0.278097	-3	7	IGF1
GO_Biological_Process_2018_	A	thyroid gland development (GO:0030878)	1/11	0.057836	0.221518	0.0719081	0.278097	-3	7	PAX8
GO_Biological_Process_2018_	A	polyol biosynthetic process (GO:0046173)	1/9	0.0475727	0.221518	0.0602889	0.278097	-2	7	IP6K3
GO_Biological_Process_2018_	A	response to forskolin (GO:1904321)	1/9	0.0475727	0.221518	0.0602889	0.278097	-2	7	ADCY2
GO_Biological_Process_2018_	A	positive regulation of calcium ion import (GO:0090280)	1/11	0.057836	0.221518	0.0719081	0.278097	-3	7	CCL3
GO_Biological_Process_2018_	A	carbohydrate homeostasis (GO:0033500)	3/64	0.00502384	0.0825849	0.00828388	0.135294	-1	7	KCNB1;IGF1;ADIPOR2
GO_Biological_Process_2018_	A	mesenchymal to epithelial transition (GO:0060231)	1/11	0.057836	0.221518	0.0719081	0.278097	-3	7	PAX8
GO_Biological_Process_2018_	A	T cell chemotaxis (GO:0010818)	1/11	0.057836	0.221518	0.0719081	0.278097	-3	7	CCL3
GO_Biological_Process_2018_	A	glycine transport (GO:0015816)	1/10	0.0527181	0.221518	0.0661164	0.278097	-2	7	SLC36A2
GO_Biological_Process_2018_	A	regulation of sensory perception of pain (GO:0051930)	1/10	0.0527181	0.221518	0.0661164	0.278097	-2	7	CCL3
GO_Biological_Process_2018_	A	photoreceptor cell development (GO:0042461)	1/12	0.0629265	0.221518	0.0776643	0.278097	-3	7	VEGFA
GO_Biological_Process_2018_	A	regulation of extent of cell growth (GO:0061387)	1/7	0.0371986	0.221518	0.0485259	0.278097	-2	7	NRCAM
GO_Biological_Process_2018_	A	activation of adenylate cyclase activity (GO:0007190)	2/33	0.0136785	0.158366	0.0197914	0.22914	-2	7	ADRB3;ADCY2
GO_Biological_Process_2018_	A	regulation of hydrogen peroxide-induced cell death (GO:1903205)	1/12	0.0629265	0.221518	0.0776643	0.278097	-3	7	GPR37
GO_Biological_Process_2018_	A	cholesterol biosynthetic process (GO:0006695)	2/36	0.0161508	0.171725	0.0231059	0.245677	-2	7	ACLY;DHCR7
GO_Biological_Process_2018_	A	positive regulation of macromolecule metabolic process (GO:0010604)	5/277	0.0172614	0.177877	0.0307859	0.278097	-2	7	C1QTNF1;MUSK;CCL3;IGF1;VEGFA
GO_Biological_Process_2018_	A	neuronal ion channel clustering (GO:0045161)	1/10	0.0527181	0.221518	0.0661164	0.278097	-2	7	NRCAM
GO_Biological_Process_2018_	A	nucleotide metabolic process (GO:0009117)	1/14	0.0730258	0.231001	0.089071	0.28519	-3	7	PDE8B
GO_Biological_Process_2018_	A	regulation of neuroblast proliferation (GO:1902692)	1/11	0.057836	0.221518	0.0719081	0.278097	-2	7	VEGFA
GO_Biological_Process_2018_	A	cellular nitrogen compound catabolic process (GO:0044270)	1/7	0.0371986	0.221518	0.0485259	0.278097	-2	7	CYP3A5
GO_Biological_Process_2018_	A	amino acid import across plasma membrane (GO:0089718)	1/8	0.0423996	0.221518	0.0544255	0.278097	-2	7	SLC1A3
GO_Biological_Process_2018_	A	coenzyme A metabolic process (GO:0015936)	1/11	0.057836	0.221518	0.0719081	0.278097	-2	7	ACLY
GO_Biological_Process_2018_	A	creatine metabolic process (GO:0006600)	1/11	0.057836	0.221518	0.0719081	0.278097	-2	7	SLC6A8
GO_Biological_Process_2018_	A	neuron projection fasciculation (GO:0106030)	1/11	0.057836	0.221518	0.0719081	0.278097	-2	7	NRCAM
GO_Biological_Process_2018_	A	L-glutamate transport (GO:0015813)	1/11	0.057836	0.221518	0.0719081	0.278097	-2	7	SLC1A3
GO_Biological_Process_2018_	A	negative regulation of heterotypic cell-cell adhesion (GO:0034115)	1/10	0.0527181	0.221518	0.0661164	0.278097	-2	7	IL1RN
GO_Biological_Process_2018_	A	fatty acid transmembrane transport (GO:1902001)	1/12	0.0629265	0.221518	0.0776643	0.278097	-2	7	ACACA
GO_Biological_Process_2018_	A	regulation of cell-cell adhesion involved in gastrulation (GO:0070587)	1/10	0.0527181	0.221518	0.0661164	0.278097	-2	7	IL1RN
GO_Biological_Process_2018_	A	regulation of actin filament-based movement (GO:1903115)	1/11	0.057836	0.221518	0.0719081	0.278097	-2	7	PLN
GO_Biological_Process_2018_	A	negative regulation of mitochondrion organization (GO:0010823)	2/34	0.0144827	0.162268	0.0208722	0.233859	-2	7	PPIF;IGF1
GO_Biological_Process_2018_	A	macrophage migration (GO:1905517)	1/11	0.057836	0.221518	0.0719081	0.278097	-2	7	CCL3
GO_Biological_Process_2018_	A	negative regulation of proteolysis (GO:0045861)	2/42	0.0216158	0.202916	0.0303599	0.278097	-2	7	TM4SF20;PTPN3
GO_Biological_Process_2018_	A	pantothenate metabolic process (GO:0015939)	1/9	0.0475727	0.221518	0.0602889	0.278097	-2	7	FASN
GO_Biological_Process_2018_	A	regulation of relaxation of muscle (GO:1901077)	1/8	0.0423996	0.221518	0.0544255	0.278097	-2	7	PLN
GO_Biological_Process_2018_	A	regulation of protein kinase C signaling (GO:0090036)	1/12	0.0629265	0.221518	0.0776643	0.278097	-2	7	VEGFA
GO_Biological_Process_2018_	A	positive regulation of mesenchymal cell proliferation (GO:0002053)	1/12	0.0629265	0.221518	0.0776643	0.278097	-2	7	VEGFA
GO_Biological_Process_2018_	A	branching morphogenesis of an epithelial tube (GO:0048754)	2/44	0.023585	0.215661	0.0329536	0.278097	-2	7	PAX8;VEGFA
GO_Biological_Process_2018_	A	cellular response to arsenic-containing substance (GO:0071243)	1/13	0.0679897	0.225171	0.0833852	0.282102	-2	7	PPIF
GO_Biological_Process_2018_	A	protein localization to mitochondrion (GO:0070585)	1/11	0.057836	0.221518	0.0719081	0.278097	-2	7	HK2
GO_Biological_Process_2018_	A	biotin metabolic process (GO:0006768)	1/12	0.0629265	0.221518	0.0776643	0.278097	-2	7	ACACA
GO_Biological_Process_2018_	A	eye photoreceptor cell development (GO:0042462)	1/13	0.0679897	0.225171	0.0833852	0.282102	-2	7	VEGFA
GO_Biological_Process_2018_	A	negative regulation of cell activation (GO:0050866)	1/11	0.057836	0.221518	0.0719081	0.278097	-2	7	C1QTNF1
GO_Biological_Process_2018_	A	cellular response to forskolin (GO:1904322)	1/9	0.0475727	0.221518	0.0602889	0.278097	-2	7	ADCY2
GO_Biological_Process_2018_	A	regulation of glycoprotein biosynthetic process (GO:0010559)	1/10	0.0527181	0.221518	0.0661164	0.278097	-2	6	IGF1
GO_Biological_Process_2018_	A	positive regulation of cardiac muscle cell differentiation (GO:2000727)	1/11	0.057836	0.221518	0.0719081	0.278097	-2	6	IGF1
GO_Biological_Process_2018_	A	positive regulation of vascular endothelial growth factor receptor signaling pathway (GO:0030949)	1/13	0.0679897	0.225171	0.0833852	0.282102	-2	6	VEGFA
GO_Biological_Process_2018_	A	proline transport (GO:0015824)	1/10	0.0527181	0.221518	0.0661164	0.278097	-2	6	SLC36A2
GO_Biological_Process_2018_	A	carnitine shuttle (GO:0006853)	1/12	0.0629265	0.221518	0.0776643	0.278097	-2	6	ACACA
GO_Biological_Process_2018_	A	cellular response to cytokine stimulus (GO:0071345)	8/457	0.00335975	0.0660539	0.00814291	0.135294	-1	6	IL1RN;CISH;USP10;ITGAX;CCL3;MT1X;JUNB;VEGFA
GO_Biological_Process_2018_	A	positive regulation of histone deacetylation (GO:0031065)	1/12	0.0629265	0.221518	0.0776643	0.278097	-2	6	VEGFA
GO_Biological_Process_2018_	A	monocyte differentiation (GO:0030224)	1/12	0.0629265	0.221518	0.0776643	0.278097	-2	6	VEGFA
GO_Biological_Process_2018_	A	positive regulation of cellular process (GO:0048522)	8/520	0.00720771	0.100613	0.0165585	0.197708	-1	6	ACLY;FASN;NACC1;IGF1;JUNB;EIF4G2;ACACA;VEGFA
GO_Biological_Process_2018_	A	regulation of nephron tubule epithelial cell differentiation (GO:0072182)	1/10	0.0527181	0.221518	0.0661164	0.278097	-2	6	PAX8
GO_Biological_Process_2018_	A	sterol biosynthetic process (GO:0016126)	2/41	0.0206583	0.199314	0.0290952	0.278097	-2	6	ACLY;DHCR7
GO_Biological_Process_2018_	A	sprouting angiogenesis (GO:0002040)	2/45	0.0245963	0.220942	0.034282	0.278097	-2	6	PARVA;VEGFA
GO_Biological_Process_2018_	A	alanine transport (GO:0032328)	1/10	0.0527181	0.221518	0.0661164	0.278097	-2	6	SLC36A2
GO_Biological_Process_2018_	A	natural killer cell activation (GO:0030101)	2/37	0.0170142	0.177288	0.0242582	0.25277	-2	6	ULBP2;ULBP3
GO_Biological_Process_2018_	A	regulation of insulin receptor signaling pathway (GO:0046626)	2/35	0.0153069	0.169678	0.0219772	0.243619	-2	6	CISH;IGF1
GO_Biological_Process_2018_	A	organic cyclic compound catabolic process (GO:1901361)	1/12	0.0629265	0.221518	0.0776643	0.278097	-2	6	CYP1A2
GO_Biological_Process_2018_	A	mesonephros development (GO:0001823)	1/12	0.0629265	0.221518	0.0776643	0.278097	-2	6	PAX8
GO_Biological_Process_2018_	A	negative regulation of heart rate (GO:0010459)	1/8	0.0423996	0.221518	0.0544255	0.278097	-2	6	PLN
GO_Biological_Process_2018_	A	induction of positive chemotaxis (GO:0050930)	1/11	0.057836	0.221518	0.0719081	0.278097	-2	6	VEGFA
GO_Biological_Process_2018_	A	cell-substrate junction assembly (GO:0007044)	1/12	0.0629265	0.221518	0.0776643	0.278097	-2	6	LAMB3
GO_Biological_Process_2018_	A	negative regulation of bone mineralization (GO:0030502)	1/12	0.0629265	0.221518	0.0776643	0.278097	-2	6	CCL3
GO_Biological_Process_2018_	A	regulation of macromolecule biosynthetic process (GO:0010556)	1/14	0.0730258	0.231001	0.089071	0.28519	-2	6	PRG2
GO_Biological_Process_2018_	A	response to metal ion (GO:0010038)	3/73	0.00724183	0.100613	0.0116819	0.163769	-1	6	MT1A;MT1X;HAMP
GO_Biological_Process_2018_	A	relaxation of muscle (GO:0090075)	1/12	0.0629265	0.221518	0.0776643	0.278097	-2	6	PLN
GO_Biological_Process_2018_	A	icosanoid biosynthetic process (GO:0046456)	1/12	0.0629265	0.221518	0.0776643	0.278097	-2	6	FADS1
GO_Biological_Process_2018_	A	regulation of mesenchymal cell proliferation (GO:0010464)	1/13	0.0679897	0.225171	0.0833852	0.282102	-2	6	VEGFA
GO_Biological_Process_2018_	A	dicarboxylic acid catabolic process (GO:0043649)	1/14	0.0730258	0.231001	0.089071	0.28519	-2	6	GLUL
GO_Biological_Process_2018_	A	vasodilation (GO:0042311)	1/10	0.0527181	0.221518	0.0661164	0.278097	-2	6	ADRB3
GO_Biological_Process_2018_	A	glutamine metabolic process (GO:0006541)	1/11	0.057836	0.221518	0.0719081	0.278097	-2	6	GLUL
GO_Biological_Process_2018_	A	positive regulation of peptide secretion (GO:0002793)	2/36	0.0161508	0.171725	0.0231059	0.245677	-1	6	RASL10B;IGF1
GO_Biological_Process_2018_	A	lactation (GO:0007595)	1/10	0.0527181	0.221518	0.0661164	0.278097	-2	6	VEGFA
GO_Biological_Process_2018_	A	macrophage differentiation (GO:0030225)	1/12	0.0629265	0.221518	0.0776643	0.278097	-2	6	VEGFA
GO_Biological_Process_2018_	A	negative regulation of ATP metabolic process (GO:1903579)	1/13	0.0679897	0.225171	0.0833852	0.282102	-2	6	PPIF
GO_Biological_Process_2018_	A	neuron migration (GO:0001764)	2/41	0.0206583	0.199314	0.0290952	0.278097	-2	6	NRCAM;VEGFA
GO_Biological_Process_2018_	A	regulation of cytokine biosynthetic process (GO:0042035)	1/13	0.0679897	0.225171	0.0833852	0.282102	-2	6	PRG2
GO_Biological_Process_2018_	A	positive regulation of calcineurin-NFAT signaling cascade (GO:0070886)	1/8	0.0423996	0.221518	0.0544255	0.278097	-2	6	IGF1
GO_Biological_Process_2018_	A	relaxation of cardiac muscle (GO:0055119)	1/12	0.0629265	0.221518	0.0776643	0.278097	-2	6	PLN
GO_Biological_Process_2018_	A	positive regulation of secretion by cell (GO:1903532)	2/53	0.0332983	0.221518	0.0456269	0.278097	-2	6	KCNB1;IGF1
GO_Biological_Process_2018_	A	fatty acid oxidation (GO:0019395)	2/51	0.0310237	0.221518	0.0426752	0.278097	-2	6	SLC27A2;ADIPOR2
GO_Biological_Process_2018_	A	regulation of leukocyte migration (GO:0002685)	1/14	0.0730258	0.231001	0.089071	0.28519	-2	6	VEGFA
GO_Biological_Process_2018_	A	positive regulation of insulin receptor signaling pathway (GO:0046628)	1/8	0.0423996	0.221518	0.0544255	0.278097	-2	6	IGF1
GO_Biological_Process_2018_	A	regulation of protein import into nucleus, translocation (GO:0033158)	1/13	0.0679897	0.225171	0.0833852	0.282102	-2	6	IGF1
GO_Biological_Process_2018_	A	response to sterol (GO:0036314)	1/12	0.0629265	0.221518	0.0776643	0.278097	-2	6	CCL3
GO_Biological_Process_2018_	A	regulation of release of cytochrome c from mitochondria (GO:0090199)	2/41	0.0206583	0.199314	0.0290952	0.278097	-2	6	PPIF;IGF1
GO_Biological_Process_2018_	A	positive regulation of angiogenesis (GO:0045766)	3/104	0.0188082	0.190273	0.0287776	0.278097	-1	6	ANGPTL4;HK2;VEGFA
GO_Biological_Process_2018_	A	response to glucose (GO:0009749)	2/48	0.0277342	0.221518	0.0383898	0.278097	-2	6	KCNB1;IGF1
GO_Biological_Process_2018_	A	positive regulation of endothelial cell chemotaxis (GO:2001028)	1/14	0.0730258	0.231001	0.089071	0.28519	-2	6	VEGFA
GO_Biological_Process_2018_	A	regulation of blood vessel endothelial cell proliferation involved in sprouting angiogenesis (GO:1903587)	1/12	0.0629265	0.221518	0.0776643	0.278097	-2	6	VEGFA
GO_Biological_Process_2018_	A	regulation of primary metabolic process (GO:0080090)	4/140	0.00702954	0.100339	0.0122706	0.163922	-1	6	ACSL1;PSMD3;ANGPTL4;FADS1
GO_Biological_Process_2018_	A	positive regulation of MAPK cascade (GO:0043410)	6/290	0.00491615	0.0825849	0.0101588	0.149092	-1	6	GPR37;MUSK;ADRB3;CCL3;IGF1;VEGFA
GO_Biological_Process_2018_	A	N-terminal protein amino acid acetylation (GO:0006474)	1/16	0.0830173	0.233847	0.100338	0.28519	-2	6	NAA50
GO_Biological_Process_2018_	A	regulation of ion transmembrane transporter activity (GO:0032412)	2/43	0.0225914	0.210181	0.0316461	0.278097	-1	6	PPIF;PTPN3
GO_Biological_Process_2018_	A	eye photoreceptor cell differentiation (GO:0001754)	1/13	0.0679897	0.225171	0.0833852	0.282102	-2	6	VEGFA
GO_Biological_Process_2018_	A	negative regulation by host of viral transcription (GO:0043922)	1/13	0.0679897	0.225171	0.0833852	0.282102	-2	6	CCL3
GO_Biological_Process_2018_	A	negative regulation of heart contraction (GO:0045822)	1/12	0.0629265	0.221518	0.0776643	0.278097	-2	6	PLN
GO_Biological_Process_2018_	A	serine family amino acid biosynthetic process (GO:0009070)	1/13	0.0679897	0.225171	0.0833852	0.282102	-2	6	PSAT1
GO_Biological_Process_2018_	A	glutathione biosynthetic process (GO:0006750)	1/12	0.0629265	0.221518	0.0776643	0.278097	-2	6	GGCT
GO_Biological_Process_2018_	A	glutamine family amino acid biosynthetic process (GO:0009084)	1/14	0.0730258	0.231001	0.089071	0.28519	-2	6	GLUL
GO_Biological_Process_2018_	A	cellular response to nutrient levels (GO:0031669)	2/55	0.0356361	0.221518	0.0486519	0.278097	-2	6	KCNB1;FADS1
GO_Biological_Process_2018_	A	positive regulation of glycoprotein biosynthetic process (GO:0010560)	1/12	0.0629265	0.221518	0.0776643	0.278097	-2	6	IGF1
GO_Biological_Process_2018_	A	sarcoplasmic reticulum calcium ion transport (GO:0070296)	1/10	0.0527181	0.221518	0.0661164	0.278097	-2	6	CCL3
GO_Biological_Process_2018_	A	aromatic compound biosynthetic process (GO:0019438)	1/13	0.0679897	0.225171	0.0833852	0.282102	-2	6	PSAT1
GO_Biological_Process_2018_	A	skeletal myofibril assembly (GO:0014866)	1/13	0.0679897	0.225171	0.0833852	0.282102	-2	6	MYH11
GO_Biological_Process_2018_	A	negative regulation of biomineral tissue development (GO:0070168)	1/15	0.078035	0.231001	0.0947219	0.28519	-2	6	CCL3
GO_Biological_Process_2018_	A	carboxylic acid biosynthetic process (GO:0046394)	2/45	0.0245963	0.220942	0.034282	0.278097	-1	5	GLUL;FADS1
GO_Biological_Process_2018_	A	negative regulation of lipase activity (GO:0060192)	1/9	0.0475727	0.221518	0.0602889	0.278097	-2	5	ANGPTL4
GO_Biological_Process_2018_	A	negative regulation of apoptotic signaling pathway (GO:2001234)	2/66	0.0495552	0.221518	0.066501	0.278097	-2	5	PPIF;IGF1
GO_Biological_Process_2018_	A	cell migration involved in sprouting angiogenesis (GO:0002042)	1/15	0.078035	0.231001	0.0947219	0.28519	-2	5	VEGFA
GO_Biological_Process_2018_	A	myotube cell development (GO:0014904)	1/15	0.078035	0.231001	0.0947219	0.28519	-2	5	IGF1
GO_Biological_Process_2018_	A	axonal fasciculation (GO:0007413)	1/13	0.0679897	0.225171	0.0833852	0.282102	-2	5	NRCAM
GO_Biological_Process_2018_	A	striated muscle myosin thick filament assembly (GO:0071688)	1/14	0.0730258	0.231001	0.089071	0.28519	-2	5	MYH11
GO_Biological_Process_2018_	A	negative regulation of hydrogen peroxide-induced cell death (GO:1903206)	1/15	0.078035	0.231001	0.0947219	0.28519	-2	5	GPR37
GO_Biological_Process_2018_	A	mononuclear cell differentiation (GO:1903131)	1/12	0.0629265	0.221518	0.0776643	0.278097	-2	5	VEGFA
GO_Biological_Process_2018_	A	epithelial cell differentiation involved in kidney development (GO:0035850)	1/8	0.0423996	0.221518	0.0544255	0.278097	-2	5	PAX8
GO_Biological_Process_2018_	A	positive regulation of cell migration involved in sprouting angiogenesis (GO:0090050)	1/17	0.087973	0.233847	0.10592	0.28519	-2	5	VEGFA
GO_Biological_Process_2018_	A	regulation of ATPase activity (GO:0043462)	2/41	0.0206583	0.199314	0.0290952	0.278097	-1	5	PLN;PPIF
GO_Biological_Process_2018_	A	regulation of axon guidance (GO:1902667)	1/14	0.0730258	0.231001	0.089071	0.28519	-2	5	VEGFA
GO_Biological_Process_2018_	A	nonribosomal peptide biosynthetic process (GO:0019184)	1/13	0.0679897	0.225171	0.0833852	0.282102	-2	5	GGCT
GO_Biological_Process_2018_	A	molybdopterin cofactor biosynthetic process (GO:0032324)	1/8	0.0423996	0.221518	0.0544255	0.278097	-2	5	MOCOS
GO_Biological_Process_2018_	A	positive regulation of CREB transcription factor activity (GO:0032793)	1/16	0.0830173	0.233847	0.100338	0.28519	-2	5	VEGFA
GO_Biological_Process_2018_	A	artery development (GO:0060840)	1/17	0.087973	0.233847	0.10592	0.28519	-2	5	VEGFA
GO_Biological_Process_2018_	A	modified amino acid transport (GO:0072337)	1/15	0.078035	0.231001	0.0947219	0.28519	-2	5	SLC6A8
GO_Biological_Process_2018_	A	regulation of calcium ion transport (GO:0051924)	2/53	0.0332983	0.221518	0.0456269	0.278097	-2	5	PLN;CCL3
GO_Biological_Process_2018_	A	cellular response to interleukin-1 (GO:0071347)	4/151	0.00912417	0.113183	0.0156994	0.190421	-1	5	IL1RN;USP10;PSMD3;CCL3
GO_Biological_Process_2018_	A	cell morphogenesis involved in differentiation (GO:0000904)	2/55	0.0356361	0.221518	0.0486519	0.278097	-2	5	PARVA;SRCIN1
GO_Biological_Process_2018_	A	intracellular lipid transport (GO:0032365)	1/16	0.0830173	0.233847	0.100338	0.28519	-2	5	ACACA
GO_Biological_Process_2018_	A	macrophage chemotaxis (GO:0048246)	1/11	0.057836	0.221518	0.0719081	0.278097	-2	5	CCL3
GO_Biological_Process_2018_	A	smooth muscle contraction (GO:0006939)	1/15	0.078035	0.231001	0.0947219	0.28519	-2	5	MYH11
GO_Biological_Process_2018_	A	cAMP biosynthetic process (GO:0006171)	1/15	0.078035	0.231001	0.0947219	0.28519	-2	5	ADCY2
GO_Biological_Process_2018_	A	regulation of fatty acid metabolic process (GO:0019217)	1/15	0.078035	0.231001	0.0947219	0.28519	-2	5	ADIPOR2
GO_Biological_Process_2018_	A	positive regulation of cellular response to insulin stimulus (GO:1900078)	1/16	0.0830173	0.233847	0.100338	0.28519	-2	5	IGF1
GO_Biological_Process_2018_	A	body fluid secretion (GO:0007589)	1/16	0.0830173	0.233847	0.100338	0.28519	-2	5	VEGFA
GO_Biological_Process_2018_	A	N-terminal protein amino acid modification (GO:0031365)	1/18	0.0929021	0.237265	0.111468	0.288928	-2	5	NAA50
GO_Biological_Process_2018_	A	negative regulation of translational initiation (GO:0045947)	1/17	0.087973	0.233847	0.10592	0.28519	-2	5	EIF4EBP1
GO_Biological_Process_2018_	A	positive regulation of coenzyme metabolic process (GO:0051197)	1/16	0.0830173	0.233847	0.100338	0.28519	-2	5	IGF1
GO_Biological_Process_2018_	A	positive regulation of vascular smooth muscle cell proliferation (GO:1904707)	1/15	0.078035	0.231001	0.0947219	0.28519	-2	5	IGF1
GO_Biological_Process_2018_	A	steroid catabolic process (GO:0006706)	1/14	0.0730258	0.231001	0.089071	0.28519	-2	5	CYP1A2
GO_Biological_Process_2018_	A	regulation of calcineurin-NFAT signaling cascade (GO:0070884)	1/15	0.078035	0.231001	0.0947219	0.28519	-2	5	IGF1
GO_Biological_Process_2018_	A	purine ribonucleotide metabolic process (GO:0009150)	2/67	0.0509043	0.221518	0.0682181	0.278097	-2	5	ACLY;SULT4A1
GO_Biological_Process_2018_	A	branching involved in blood vessel morphogenesis (GO:0001569)	1/15	0.078035	0.231001	0.0947219	0.28519	-2	5	VEGFA
GO_Biological_Process_2018_	A	regulation of epithelial cell proliferation (GO:0050678)	2/73	0.059269	0.221518	0.0788194	0.280306	-2	5	IGF1;VEGFA
GO_Biological_Process_2018_	A	regulation of platelet aggregation (GO:0090330)	1/15	0.078035	0.231001	0.0947219	0.28519	-2	5	C1QTNF1
GO_Biological_Process_2018_	A	positive regulation of glycogen biosynthetic process (GO:0045725)	1/14	0.0730258	0.231001	0.089071	0.28519	-2	5	IGF1
GO_Biological_Process_2018_	A	positive regulation of stem cell proliferation (GO:2000648)	1/18	0.0929021	0.237265	0.111468	0.288928	-2	5	VEGFA
GO_Biological_Process_2018_	A	neuron differentiation (GO:0030182)	3/140	0.0402687	0.221518	0.059144	0.278097	-2	5	TENM3;TUBB3;VEGFA
GO_Biological_Process_2018_	A	regulation of lipid metabolic process (GO:0019216)	3/101	0.0174122	0.177877	0.026752	0.275995	-1	5	ACSL1;ANGPTL4;FADS1
GO_Biological_Process_2018_	A	kidney development (GO:0001822)	2/64	0.0468972	0.221518	0.0631119	0.278097	-2	5	PAX8;VEGFA
GO_Biological_Process_2018_	A	response to corticosteroid (GO:0031960)	1/12	0.0629265	0.221518	0.0776643	0.278097	-2	5	IL1RN
GO_Biological_Process_2018_	A	mitotic sister chromatid cohesion (GO:0007064)	1/16	0.0830173	0.233847	0.100338	0.28519	-2	5	NAA50
GO_Biological_Process_2018_	A	regulation of systemic arterial blood pressure by hormone (GO:0001990)	1/17	0.087973	0.233847	0.10592	0.28519	-2	5	RASL10B
GO_Biological_Process_2018_	A	regulation of mitochondrial membrane permeability (GO:0046902)	1/19	0.0978049	0.242073	0.116981	0.294431	-2	5	PPIF
GO_Biological_Process_2018_	A	myotube differentiation (GO:0014902)	1/16	0.0830173	0.233847	0.100338	0.28519	-2	5	IGF1
GO_Biological_Process_2018_	A	negative regulation of platelet activation (GO:0010544)	1/16	0.0830173	0.233847	0.100338	0.28519	-2	5	C1QTNF1
GO_Biological_Process_2018_	A	purine ribonucleoside bisphosphate metabolic process (GO:0034035)	1/20	0.102681	0.242617	0.122461	0.294698	-2	5	SULT4A1
GO_Biological_Process_2018_	A	positive regulation of mitotic cell cycle (GO:0045931)	2/53	0.0332983	0.221518	0.0456269	0.278097	-1	5	EIF4EBP1;IGF1
GO_Biological_Process_2018_	A	tricarboxylic acid metabolic process (GO:0072350)	1/14	0.0730258	0.231001	0.089071	0.28519	-2	5	ACLY
GO_Biological_Process_2018_	A	cytokine-mediated signaling pathway (GO:0019221)	8/634	0.0215592	0.202916	0.0453642	0.278097	-1	5	IL1RN;CISH;PSMD3;ITGAX;CCL3;JUNB;ADIPOR2;VEGFA
GO_Biological_Process_2018_	A	positive regulation of calcium ion-dependent exocytosis (GO:0045956)	1/15	0.078035	0.231001	0.0947219	0.28519	-2	5	KCNB1
GO_Biological_Process_2018_	A	positive regulation of carbohydrate metabolic process (GO:0045913)	1/19	0.0978049	0.242073	0.116981	0.294431	-2	5	IGF1
GO_Biological_Process_2018_	A	positive regulation of glycogen metabolic process (GO:0070875)	1/15	0.078035	0.231001	0.0947219	0.28519	-2	5	IGF1
GO_Biological_Process_2018_	A	regulation of long term synaptic depression (GO:1900452)	1/9	0.0475727	0.221518	0.0602889	0.278097	-2	5	KCNB1
GO_Biological_Process_2018_	A	extracellular matrix assembly (GO:0085029)	1/17	0.087973	0.233847	0.10592	0.28519	-2	5	MYH11
GO_Biological_Process_2018_	A	T cell migration (GO:0072678)	1/17	0.087973	0.233847	0.10592	0.28519	-2	5	CCL3
GO_Biological_Process_2018_	A	postsynaptic membrane organization (GO:0001941)	1/17	0.087973	0.233847	0.10592	0.28519	-2	5	MUSK
GO_Biological_Process_2018_	A	positive regulation of cardiac muscle tissue growth (GO:0055023)	1/17	0.087973	0.233847	0.10592	0.28519	-2	5	IGF1
GO_Biological_Process_2018_	A	programmed necrotic cell death (GO:0097300)	1/17	0.087973	0.233847	0.10592	0.28519	-2	5	PPIF
GO_Biological_Process_2018_	A	regulation of oxidative phosphorylation (GO:0002082)	1/10	0.0527181	0.221518	0.0661164	0.278097	-2	5	PPIF
GO_Biological_Process_2018_	A	positive regulation of glycolytic process (GO:0045821)	1/16	0.0830173	0.233847	0.100338	0.28519	-2	5	IGF1
GO_Biological_Process_2018_	A	lipopolysaccharide-mediated signaling pathway (GO:0031663)	1/17	0.087973	0.233847	0.10592	0.28519	-2	5	CCL3
GO_Biological_Process_2018_	A	positive regulation of immune system process (GO:0002684)	1/17	0.087973	0.233847	0.10592	0.28519	-2	5	VEGFA
GO_Biological_Process_2018_	A	peptidyl-threonine dephosphorylation (GO:0035970)	1/17	0.087973	0.233847	0.10592	0.28519	-2	5	DUSP4
GO_Biological_Process_2018_	A	fatty acid catabolic process (GO:0009062)	2/66	0.0495552	0.221518	0.066501	0.278097	-2	5	LPIN1;SLC27A2
GO_Biological_Process_2018_	A	heart development (GO:0007507)	3/150	0.0477463	0.221518	0.0694694	0.278097	-2	5	ALPK3;FOXL1;VEGFA
GO_Biological_Process_2018_	A	release of cytochrome c from mitochondria (GO:0001836)	1/19	0.0978049	0.242073	0.116981	0.294431	-2	5	GGCT
GO_Biological_Process_2018_	A	triglyceride metabolic process (GO:0006641)	2/53	0.0332983	0.221518	0.0456269	0.278097	-1	5	MOGAT2;LPIN1
GO_Biological_Process_2018_	A	positive regulation of positive chemotaxis (GO:0050927)	1/17	0.087973	0.233847	0.10592	0.28519	-2	5	VEGFA
GO_Biological_Process_2018_	A	positive regulation of small GTPase mediated signal transduction (GO:0051057)	1/16	0.0830173	0.233847	0.100338	0.28519	-2	5	IGF1
GO_Biological_Process_2018_	A	positive regulation of neural precursor cell proliferation (GO:2000179)	1/15	0.078035	0.231001	0.0947219	0.28519	-2	4	VEGFA
GO_Biological_Process_2018_	A	negative regulation of insulin secretion (GO:0046676)	1/16	0.0830173	0.233847	0.100338	0.28519	-2	4	KCNB1
GO_Biological_Process_2018_	A	negative regulation of cation transmembrane transport (GO:1904063)	1/15	0.078035	0.231001	0.0947219	0.28519	-2	4	HAMP
GO_Biological_Process_2018_	A	negative regulation of programmed cell death (GO:0043069)	6/409	0.0235944	0.215661	0.0439482	0.278097	-1	4	MUSK;PPIF;IGF1;ANGPTL4;ATF5;VEGFA
GO_Biological_Process_2018_	A	response to cholesterol (GO:0070723)	1/16	0.0830173	0.233847	0.100338	0.28519	-2	4	CCL3
GO_Biological_Process_2018_	A	regulation of sprouting angiogenesis (GO:1903670)	1/20	0.102681	0.242617	0.122461	0.294698	-2	4	VEGFA
GO_Biological_Process_2018_	A	positive regulation of cardiac muscle hypertrophy (GO:0010613)	1/17	0.087973	0.233847	0.10592	0.28519	-2	4	IGF1
GO_Biological_Process_2018_	A	negative regulation of peptide hormone secretion (GO:0090278)	1/17	0.087973	0.233847	0.10592	0.28519	-2	4	KCNB1
GO_Biological_Process_2018_	A	glutamine family amino acid catabolic process (GO:0009065)	1/17	0.087973	0.233847	0.10592	0.28519	-2	4	GLUL
GO_Biological_Process_2018_	A	maintenance of protein localization in organelle (GO:0072595)	1/19	0.0978049	0.242073	0.116981	0.294431	-2	4	HK2
GO_Biological_Process_2018_	A	nitrogen compound transport (GO:0071705)	2/75	0.062156	0.221518	0.0824614	0.282102	-2	4	SLC36A2;SLC16A10
GO_Biological_Process_2018_	A	positive regulation of nitrogen compound metabolic process (GO:0051173)	1/18	0.0929021	0.237265	0.111468	0.288928	-2	4	PAX8
GO_Biological_Process_2018_	A	iron ion homeostasis (GO:0055072)	2/64	0.0468972	0.221518	0.0631119	0.278097	-1	4	TF;HAMP
GO_Biological_Process_2018_	A	positive regulation of focal adhesion assembly (GO:0051894)	1/18	0.0929021	0.237265	0.111468	0.288928	-2	4	VEGFA
GO_Biological_Process_2018_	A	positive regulation of peptidyl-tyrosine phosphorylation (GO:0050731)	3/117	0.0255571	0.221518	0.0384685	0.278097	-1	4	IGF1;SRCIN1;VEGFA
GO_Biological_Process_2018_	A	hemidesmosome assembly (GO:0031581)	1/12	0.0629265	0.221518	0.0776643	0.278097	-2	4	LAMB3
GO_Biological_Process_2018_	A	cell projection assembly (GO:0030031)	1/21	0.107532	0.247347	0.127907	0.298832	-2	4	PARVA
GO_Biological_Process_2018_	A	regulation of insulin-like growth factor receptor signaling pathway (GO:0043567)	1/18	0.0929021	0.237265	0.111468	0.288928	-2	4	IGF1
GO_Biological_Process_2018_	A	positive regulation of leukocyte chemotaxis (GO:0002690)	2/62	0.044294	0.221518	0.0597842	0.278097	-1	4	CCL3;VEGFA
GO_Biological_Process_2018_	A	dephosphorylation (GO:0016311)	3/125	0.030275	0.221518	0.0451585	0.278097	-1	4	DUSP4;DUSP2;PTPN3
GO_Biological_Process_2018_	A	regulation of multicellular organism growth (GO:0040014)	1/18	0.0929021	0.237265	0.111468	0.288928	-2	4	IGF1
GO_Biological_Process_2018_	A	positive regulation of hormone secretion (GO:0046887)	1/18	0.0929021	0.237265	0.111468	0.288928	-2	4	RASL10B
GO_Biological_Process_2018_	A	positive regulation of lymphocyte migration (GO:2000403)	1/18	0.0929021	0.237265	0.111468	0.288928	-2	4	CCL3
GO_Biological_Process_2018_	A	cell chemotaxis (GO:0060326)	2/61	0.0430134	0.221518	0.0581441	0.278097	-1	4	PARVA;VEGFA
GO_Biological_Process_2018_	A	L-serine metabolic process (GO:0006563)	1/12	0.0629265	0.221518	0.0776643	0.278097	-2	4	PSAT1
GO_Biological_Process_2018_	A	response to purine-containing compound (GO:0014074)	1/18	0.0929021	0.237265	0.111468	0.288928	-2	4	JUNB
GO_Biological_Process_2018_	A	positive chemotaxis (GO:0050918)	1/18	0.0929021	0.237265	0.111468	0.288928	-2	4	VEGFA
GO_Biological_Process_2018_	A	adenylate cyclase-inhibiting G-protein coupled receptor signaling pathway (GO:0007193)	2/64	0.0468972	0.221518	0.0631119	0.278097	-1	4	GPR37;ADCY2
GO_Biological_Process_2018_	A	cyclic nucleotide biosynthetic process (GO:0009190)	1/20	0.102681	0.242617	0.122461	0.294698	-2	4	ADCY2
GO_Biological_Process_2018_	A	response to organophosphorus (GO:0046683)	1/19	0.0978049	0.242073	0.116981	0.294431	-2	4	JUNB
GO_Biological_Process_2018_	A	branching involved in ureteric bud morphogenesis (GO:0001658)	1/21	0.107532	0.247347	0.127907	0.298832	-2	4	PAX8
GO_Biological_Process_2018_	A	zinc II ion transport (GO:0006829)	1/22	0.112356	0.25016	0.133319	0.300041	-2	4	SLC39A14
GO_Biological_Process_2018_	A	positive regulation of neuron apoptotic process (GO:0043525)	1/20	0.102681	0.242617	0.122461	0.294698	-2	4	CCL3
GO_Biological_Process_2018_	A	protein dephosphorylation (GO:0006470)	3/126	0.0308949	0.221518	0.0460329	0.278097	-1	4	DUSP4;DUSP2;PTPN3
GO_Biological_Process_2018_	A	negative regulation of intracellular transport (GO:0032387)	1/18	0.0929021	0.237265	0.111468	0.288928	-2	4	PLN
GO_Biological_Process_2018_	A	L-alpha-amino acid transmembrane transport (GO:1902475)	1/16	0.0830173	0.233847	0.100338	0.28519	-2	4	SLC1A3
GO_Biological_Process_2018_	A	macromolecule biosynthetic process (GO:0009059)	1/20	0.102681	0.242617	0.122461	0.294698	-2	4	EIF4G2
GO_Biological_Process_2018_	A	adrenergic receptor signaling pathway (GO:0071875)	1/21	0.107532	0.247347	0.127907	0.298832	-2	4	ADRB3
GO_Biological_Process_2018_	A	adenylate cyclase-activating adrenergic receptor signaling pathway (GO:0071880)	1/21	0.107532	0.247347	0.127907	0.298832	-2	4	ADRB3
GO_Biological_Process_2018_	A	glycoprotein biosynthetic process (GO:0009101)	2/73	0.059269	0.221518	0.0788194	0.280306	-1	4	FOXL1;IGF1
GO_Biological_Process_2018_	A	renal system development (GO:0072001)	2/60	0.0417471	0.221518	0.0565202	0.278097	-1	4	PAX8;VEGFA
GO_Biological_Process_2018_	A	negative regulation of osteoclast differentiation (GO:0045671)	1/19	0.0978049	0.242073	0.116981	0.294431	-2	4	CCL3
GO_Biological_Process_2018_	A	ureteric bud morphogenesis (GO:0060675)	1/21	0.107532	0.247347	0.127907	0.298832	-2	4	PAX8
GO_Biological_Process_2018_	A	long-chain fatty-acyl-CoA biosynthetic process (GO:0035338)	1/19	0.0978049	0.242073	0.116981	0.294431	-2	4	ACSL1
GO_Biological_Process_2018_	A	positive regulation of regulated secretory pathway (GO:1903307)	1/17	0.087973	0.233847	0.10592	0.28519	-2	4	KCNB1
GO_Biological_Process_2018_	A	regulation of smooth muscle cell migration (GO:0014910)	1/19	0.0978049	0.242073	0.116981	0.294431	-2	4	IGF1
GO_Biological_Process_2018_	A	adenylate cyclase-modulating G-protein coupled receptor signaling pathway (GO:0007188)	3/135	0.0367727	0.221518	0.0542776	0.278097	-1	4	GPR37;ADRB3;ADCY2
GO_Biological_Process_2018_	A	cellular amide metabolic process (GO:0043603)	2/63	0.0455886	0.221518	0.0614402	0.278097	-1	4	FASN;ACACA
GO_Biological_Process_2018_	A	regulation of lipoprotein lipase activity (GO:0051004)	1/21	0.107532	0.247347	0.127907	0.298832	-2	4	ANGPTL4
GO_Biological_Process_2018_	A	myoblast differentiation (GO:0045445)	1/17	0.087973	0.233847	0.10592	0.28519	-2	4	IGF1
GO_Biological_Process_2018_	A	positive regulation of p38MAPK cascade (GO:1900745)	1/19	0.0978049	0.242073	0.116981	0.294431	-2	4	VEGFA
GO_Biological_Process_2018_	A	regulation of platelet activation (GO:0010543)	1/20	0.102681	0.242617	0.122461	0.294698	-2	4	C1QTNF1
GO_Biological_Process_2018_	A	positive regulation of transcription from RNA polymerase II promoter involved in cellular response to chemical stimulus (GO:1901522)	1/22	0.112356	0.25016	0.133319	0.300041	-2	4	VEGFA
GO_Biological_Process_2018_	A	cellular response to interleukin-7 (GO:0098761)	1/20	0.102681	0.242617	0.122461	0.294698	-2	4	CISH
GO_Biological_Process_2018_	A	regulation of peptidyl-tyrosine phosphorylation (GO:0050730)	2/86	0.0788409	0.232726	0.103359	0.28519	-2	4	IGF1;VEGFA
GO_Biological_Process_2018_	A	phosphatidylethanolamine biosynthetic process (GO:0006646)	1/16	0.0830173	0.233847	0.100338	0.28519	-2	4	LPIN1
GO_Biological_Process_2018_	A	epoxygenase P450 pathway (GO:0019373)	1/22	0.112356	0.25016	0.133319	0.300041	-2	4	CYP1A2
GO_Biological_Process_2018_	A	mammary gland development (GO:0030879)	1/25	0.126675	0.253547	0.149359	0.304602	-2	4	VEGFA
GO_Biological_Process_2018_	A	dopaminergic neuron differentiation (GO:0071542)	1/21	0.107532	0.247347	0.127907	0.298832	-2	4	VEGFA
GO_Biological_Process_2018_	A	ERK1 and ERK2 cascade (GO:0070371)	1/22	0.112356	0.25016	0.133319	0.300041	-2	4	IGF1
GO_Biological_Process_2018_	A	regulation of vascular endothelial growth factor receptor signaling pathway (GO:0030947)	1/23	0.117155	0.253547	0.138699	0.303622	-2	4	VEGFA
GO_Biological_Process_2018_	A	heterocycle biosynthetic process (GO:0018130)	1/18	0.0929021	0.237265	0.111468	0.288928	-2	4	MOCOS
GO_Biological_Process_2018_	A	TOR signaling (GO:0031929)	1/24	0.121928	0.253547	0.144045	0.304602	-2	4	EIF4EBP1
GO_Biological_Process_2018_	A	positive regulation of axon extension (GO:0045773)	1/20	0.102681	0.242617	0.122461	0.294698	-2	4	VEGFA
GO_Biological_Process_2018_	A	primary alcohol metabolic process (GO:0034308)	1/20	0.102681	0.242617	0.122461	0.294698	-2	4	IGF1
GO_Biological_Process_2018_	A	zinc II ion transmembrane transport (GO:0071577)	1/24	0.121928	0.253547	0.144045	0.304602	-2	4	SLC39A14
GO_Biological_Process_2018_	A	positive regulation of activated T cell proliferation (GO:0042104)	1/20	0.102681	0.242617	0.122461	0.294698	-2	4	IGF1
GO_Biological_Process_2018_	A	protein complex localization (GO:0031503)	1/23	0.117155	0.253547	0.138699	0.303622	-2	4	ALPK3
GO_Biological_Process_2018_	A	negative regulation of protein tyrosine kinase activity (GO:0061099)	1/22	0.112356	0.25016	0.133319	0.300041	-2	4	SRCIN1
GO_Biological_Process_2018_	A	negative regulation of MAP kinase activity (GO:0043407)	2/62	0.044294	0.221518	0.0597842	0.278097	-1	4	DUSP4;DUSP2
GO_Biological_Process_2018_	A	energy reserve metabolic process (GO:0006112)	1/22	0.112356	0.25016	0.133319	0.300041	-2	4	ADRB3
GO_Biological_Process_2018_	A	negative regulation of cellular catabolic process (GO:0031330)	2/57	0.0380356	0.221518	0.0517479	0.278097	-1	4	EIF4G2;PTPN3
GO_Biological_Process_2018_	A	protein transport along microtubule (GO:0098840)	1/17	0.087973	0.233847	0.10592	0.28519	-2	4	ALPK3
GO_Biological_Process_2018_	A	phosphatidylethanolamine metabolic process (GO:0046337)	1/21	0.107532	0.247347	0.127907	0.298832	-2	4	LPIN1
GO_Biological_Process_2018_	A	regulation of membrane depolarization (GO:0003254)	1/17	0.087973	0.233847	0.10592	0.28519	-2	4	PTPN3
GO_Biological_Process_2018_	A	outflow tract septum morphogenesis (GO:0003148)	1/23	0.117155	0.253547	0.138699	0.303622	-2	4	PARVA
GO_Biological_Process_2018_	A	interleukin-7-mediated signaling pathway (GO:0038111)	1/20	0.102681	0.242617	0.122461	0.294698	-2	4	CISH
GO_Biological_Process_2018_	A	regulation of cardiac muscle hypertrophy (GO:0010611)	1/22	0.112356	0.25016	0.133319	0.300041	-2	4	IGF1
GO_Biological_Process_2018_	A	adenylate cyclase-activating G-protein coupled receptor signaling pathway (GO:0007189)	2/79	0.0680698	0.225171	0.0898969	0.28519	-1	4	ADRB3;ADCY2
GO_Biological_Process_2018_	A	glutamate metabolic process (GO:0006536)	1/22	0.112356	0.25016	0.133319	0.300041	-2	4	GLUL
GO_Biological_Process_2018_	A	regulation of spindle organization (GO:0090224)	1/19	0.0978049	0.242073	0.116981	0.294431	-2	4	ANKRD53
GO_Biological_Process_2018_	A	metanephros development (GO:0001656)	1/24	0.121928	0.253547	0.144045	0.304602	-2	4	PAX8
GO_Biological_Process_2018_	A	mitochondrial membrane organization (GO:0007006)	1/20	0.102681	0.242617	0.122461	0.294698	-2	4	PPIF
GO_Biological_Process_2018_	A	positive regulation of ATP metabolic process (GO:1903580)	1/24	0.121928	0.253547	0.144045	0.304602	-2	4	IGF1
GO_Biological_Process_2018_	A	cholesterol metabolic process (GO:0008203)	2/69	0.0536418	0.221518	0.0716958	0.278097	-1	4	ACLY;DHCR7
GO_Biological_Process_2018_	A	regulation of angiogenesis (GO:0045765)	3/178	0.0719822	0.231001	0.102283	0.28519	-1	4	ANGPTL4;HK2;VEGFA
GO_Biological_Process_2018_	A	neuromuscular junction development (GO:0007528)	1/21	0.107532	0.247347	0.127907	0.298832	-2	4	MUSK
GO_Biological_Process_2018_	A	positive regulation of embryonic development (GO:0040019)	1/26	0.131397	0.253547	0.15464	0.304602	-2	4	IGF1
GO_Biological_Process_2018_	A	cellular response to hexose stimulus (GO:0071331)	1/22	0.112356	0.25016	0.133319	0.300041	-2	4	KCNB1
GO_Biological_Process_2018_	A	positive regulation of protein autophosphorylation (GO:0031954)	1/23	0.117155	0.253547	0.138699	0.303622	-2	4	VEGFA
GO_Biological_Process_2018_	A	negative regulation of cell cycle G2/M phase transition (GO:1902750)	2/70	0.0550298	0.221518	0.0734561	0.278097	-1	4	PSMD3;ATF5
GO_Biological_Process_2018_	A	positive regulation of protein phosphorylation (GO:0001934)	5/413	0.0732205	0.231001	0.117672	0.294698	-1	4	GPR37;MUSK;ADRB3;IGF1;VEGFA
GO_Biological_Process_2018_	A	urogenital system development (GO:0001655)	1/23	0.117155	0.253547	0.138699	0.303622	-2	4	PAX8
GO_Biological_Process_2018_	A	regulation of axon extension involved in axon guidance (GO:0048841)	1/24	0.121928	0.253547	0.144045	0.304602	-2	4	VEGFA
GO_Biological_Process_2018_	A	regulation of glycogen biosynthetic process (GO:0005979)	1/21	0.107532	0.247347	0.127907	0.298832	-2	3	IGF1
GO_Biological_Process_2018_	A	positive regulation of neurogenesis (GO:0050769)	2/70	0.0550298	0.221518	0.0734561	0.278097	-1	3	NRCAM;VEGFA
GO_Biological_Process_2018_	A	regulation of heterotypic cell-cell adhesion (GO:0034114)	1/20	0.102681	0.242617	0.122461	0.294698	-2	3	IL1RN
GO_Biological_Process_2018_	A	negative regulation of calcium ion transport (GO:0051926)	1/20	0.102681	0.242617	0.122461	0.294698	-2	3	PLN
GO_Biological_Process_2018_	A	negative regulation of ion transmembrane transporter activity (GO:0032413)	1/22	0.112356	0.25016	0.133319	0.300041	-2	3	PLN
GO_Biological_Process_2018_	A	mesoderm development (GO:0007498)	1/22	0.112356	0.25016	0.133319	0.300041	-2	3	VEGFA
GO_Biological_Process_2018_	A	positive regulation of muscle hypertrophy (GO:0014742)	1/15	0.078035	0.231001	0.0947219	0.28519	-1	3	IGF1
GO_Biological_Process_2018_	A	positive regulation of adherens junction organization (GO:1903393)	1/20	0.102681	0.242617	0.122461	0.294698	-1	3	VEGFA
GO_Biological_Process_2018_	A	exogenous drug catabolic process (GO:0042738)	1/24	0.121928	0.253547	0.144045	0.304602	-2	3	CYP1A2
GO_Biological_Process_2018_	A	water-soluble vitamin metabolic process (GO:0006767)	2/78	0.0665743	0.225171	0.0880197	0.28519	-1	3	FASN;ACACA
GO_Biological_Process_2018_	A	blood vessel endothelial cell migration (GO:0043534)	1/19	0.0978049	0.242073	0.116981	0.294431	-1	3	VEGFA
GO_Biological_Process_2018_	A	regulation of dendritic spine morphogenesis (GO:0061001)	1/24	0.121928	0.253547	0.144045	0.304602	-2	3	SRCIN1
GO_Biological_Process_2018_	A	negative regulation of viral transcription (GO:0032897)	1/24	0.121928	0.253547	0.144045	0.304602	-2	3	CCL3
GO_Biological_Process_2018_	A	positive regulation of cellular component movement (GO:0051272)	1/22	0.112356	0.25016	0.133319	0.300041	-2	3	VEGFA
GO_Biological_Process_2018_	A	protein O-linked fucosylation (GO:0036066)	1/16	0.0830173	0.233847	0.100338	0.28519	-1	3	SPON1
GO_Biological_Process_2018_	A	regulation of membrane protein ectodomain proteolysis (GO:0051043)	1/23	0.117155	0.253547	0.138699	0.303622	-2	3	PTPN3
GO_Biological_Process_2018_	A	transition metal ion homeostasis (GO:0055076)	1/25	0.126675	0.253547	0.149359	0.304602	-2	3	TF
GO_Biological_Process_2018_	A	positive regulation of transcription regulatory region DNA binding (GO:2000679)	1/20	0.102681	0.242617	0.122461	0.294698	-1	3	IGF1
GO_Biological_Process_2018_	A	ear morphogenesis (GO:0042471)	1/25	0.126675	0.253547	0.149359	0.304602	-2	3	PAX8
GO_Biological_Process_2018_	A	cellular response to amyloid-beta (GO:1904646)	1/24	0.121928	0.253547	0.144045	0.304602	-2	3	IGF1
GO_Biological_Process_2018_	A	acylglycerol homeostasis (GO:0055090)	1/23	0.117155	0.253547	0.138699	0.303622	-2	3	ANGPTL4
GO_Biological_Process_2018_	A	negative regulation of oxidative stress-induced cell death (GO:1903202)	1/25	0.126675	0.253547	0.149359	0.304602	-2	3	GPR37
GO_Biological_Process_2018_	A	neutral amino acid transport (GO:0015804)	1/26	0.131397	0.253547	0.15464	0.304602	-2	3	SLC36A2
GO_Biological_Process_2018_	A	activation of protein kinase A activity (GO:0034199)	1/17	0.087973	0.233847	0.10592	0.28519	-1	3	ADCY2
GO_Biological_Process_2018_	A	regulation of protein targeting to membrane (GO:0090313)	1/28	0.140765	0.260846	0.165104	0.31223	-2	3	KCNB1
GO_Biological_Process_2018_	A	digestive system development (GO:0055123)	1/23	0.117155	0.253547	0.138699	0.303622	-2	3	CLMP
GO_Biological_Process_2018_	A	cGMP biosynthetic process (GO:0006182)	1/25	0.126675	0.253547	0.149359	0.304602	-2	3	ADCY2
GO_Biological_Process_2018_	A	positive regulation of cell junction assembly (GO:1901890)	1/24	0.121928	0.253547	0.144045	0.304602	-2	3	VEGFA
GO_Biological_Process_2018_	A	positive regulation of release of cytochrome c from mitochondria (GO:0090200)	1/27	0.136093	0.255512	0.159888	0.30682	-2	3	PPIF
GO_Biological_Process_2018_	A	ATP generation from ADP (GO:0006757)	1/25	0.126675	0.253547	0.149359	0.304602	-2	3	HK2
GO_Biological_Process_2018_	A	positive regulation of protein targeting to membrane (GO:0090314)	1/23	0.117155	0.253547	0.138699	0.303622	-1	3	KCNB1
GO_Biological_Process_2018_	A	peptidyl-tyrosine dephosphorylation (GO:0035335)	1/26	0.131397	0.253547	0.15464	0.304602	-2	3	DUSP4
GO_Biological_Process_2018_	A	bile acid biosynthetic process (GO:0006699)	1/27	0.136093	0.255512	0.159888	0.30682	-2	3	SLC27A2
GO_Biological_Process_2018_	A	striated muscle cell development (GO:0055002)	1/21	0.107532	0.247347	0.127907	0.298832	-1	3	IGF1
GO_Biological_Process_2018_	A	positive regulation of glucose transport (GO:0010828)	1/26	0.131397	0.253547	0.15464	0.304602	-2	3	IGF1
GO_Biological_Process_2018_	A	long-chain fatty-acyl-CoA metabolic process (GO:0035336)	1/26	0.131397	0.253547	0.15464	0.304602	-2	3	ACSL1
GO_Biological_Process_2018_	A	regulation of centrosome cycle (GO:0046605)	1/27	0.136093	0.255512	0.159888	0.30682	-2	3	ATF5
GO_Biological_Process_2018_	A	negative regulation of insulin receptor signaling pathway (GO:0046627)	1/26	0.131397	0.253547	0.15464	0.304602	-2	3	CISH
GO_Biological_Process_2018_	A	respiratory tube development (GO:0030323)	1/26	0.131397	0.253547	0.15464	0.304602	-2	3	VEGFA
GO_Biological_Process_2018_	A	positive regulation of interleukin-1 beta secretion (GO:0050718)	1/26	0.131397	0.253547	0.15464	0.304602	-2	3	CCL3
GO_Biological_Process_2018_	A	cAMP metabolic process (GO:0046058)	1/25	0.126675	0.253547	0.149359	0.304602	-2	3	ADCY2
GO_Biological_Process_2018_	A	regulation of cardiac muscle cell contraction (GO:0086004)	1/27	0.136093	0.255512	0.159888	0.30682	-2	3	PLN
GO_Biological_Process_2018_	A	negative regulation of peptidyl-tyrosine phosphorylation (GO:0050732)	1/28	0.140765	0.260846	0.165104	0.31223	-2	3	SRCIN1
GO_Biological_Process_2018_	A	steroid biosynthetic process (GO:0006694)	2/80	0.0695765	0.229426	0.0917861	0.28519	-1	3	DHCR7;SLC27A2
GO_Biological_Process_2018_	A	cellular response to vascular endothelial growth factor stimulus (GO:0035924)	1/26	0.131397	0.253547	0.15464	0.304602	-2	3	VEGFA
GO_Biological_Process_2018_	A	regulation of microtubule cytoskeleton organization (GO:0070507)	1/24	0.121928	0.253547	0.144045	0.304602	-1	3	ATF5
GO_Biological_Process_2018_	A	regulation of transcription from RNA polymerase II promoter in response to hypoxia (GO:0061418)	2/79	0.0680698	0.225171	0.0898969	0.28519	-1	3	PSMD3;VEGFA
GO_Biological_Process_2018_	A	positive regulation of microtubule polymerization (GO:0031116)	1/25	0.126675	0.253547	0.149359	0.304602	-1	3	ANKRD53
GO_Biological_Process_2018_	A	cGMP metabolic process (GO:0046068)	1/29	0.145411	0.26351	0.170289	0.31517	-2	3	ADCY2
GO_Biological_Process_2018_	A	internal peptidyl-lysine acetylation (GO:0018393)	1/27	0.136093	0.255512	0.159888	0.30682	-2	3	NAA50
GO_Biological_Process_2018_	A	regulation of catecholamine secretion (GO:0050433)	1/23	0.117155	0.253547	0.138699	0.303622	-1	3	KCNB1
GO_Biological_Process_2018_	A	response to alcohol (GO:0097305)	1/26	0.131397	0.253547	0.15464	0.304602	-1	3	CCL3
GO_Biological_Process_2018_	A	lipid modification (GO:0030258)	1/27	0.136093	0.255512	0.159888	0.30682	-2	3	CYP3A5
GO_Biological_Process_2018_	A	in utero embryonic development (GO:0001701)	1/26	0.131397	0.253547	0.15464	0.304602	-1	3	VEGFA
GO_Biological_Process_2018_	A	interleukin-1-mediated signaling pathway (GO:0070498)	2/96	0.0950673	0.242073	0.123459	0.296416	-1	3	IL1RN;PSMD3
GO_Biological_Process_2018_	A	acute-phase response (GO:0006953)	1/19	0.0978049	0.242073	0.116981	0.294431	-1	3	IL1RN
GO_Biological_Process_2018_	A	cellular response to hydrogen peroxide (GO:0070301)	1/29	0.145411	0.26351	0.170289	0.31517	-2	3	PPIF
GO_Biological_Process_2018_	A	oxoacid metabolic process (GO:0043436)	1/33	0.163749	0.276094	0.190709	0.32634	-2	3	SULT4A1
GO_Biological_Process_2018_	A	regulation of calcium ion transmembrane transporter activity (GO:1901019)	1/28	0.140765	0.260846	0.165104	0.31223	-2	3	PLN
GO_Biological_Process_2018_	A	negative regulation of cellular response to insulin stimulus (GO:1900077)	1/27	0.136093	0.255512	0.159888	0.30682	-1	3	CISH
GO_Biological_Process_2018_	A	cellular lipid catabolic process (GO:0044242)	1/25	0.126675	0.253547	0.149359	0.304602	-1	3	LPIN1
GO_Biological_Process_2018_	A	positive regulation of glucose import (GO:0046326)	1/27	0.136093	0.255512	0.159888	0.30682	-1	3	IGF1
GO_Biological_Process_2018_	A	positive regulation of nuclear division (GO:0051785)	1/26	0.131397	0.253547	0.15464	0.304602	-1	3	IGF1
GO_Biological_Process_2018_	A	glycolytic process (GO:0006096)	1/24	0.121928	0.253547	0.144045	0.304602	-1	3	HK2
GO_Biological_Process_2018_	A	positive regulation of receptor internalization (GO:0002092)	1/22	0.112356	0.25016	0.133319	0.300041	-1	3	VEGFA
GO_Biological_Process_2018_	A	steroid metabolic process (GO:0008202)	2/100	0.101805	0.242617	0.131748	0.300041	-1	3	CYP1A2;CYP3A5
GO_Biological_Process_2018_	A	positive regulation of microtubule polymerization or depolymerization (GO:0031112)	1/25	0.126675	0.253547	0.149359	0.304602	-1	3	ANKRD53
GO_Biological_Process_2018_	A	response to amyloid-beta (GO:1904645)	1/26	0.131397	0.253547	0.15464	0.304602	-1	3	IGF1
GO_Biological_Process_2018_	A	response to interleukin-1 (GO:0070555)	2/77	0.06509	0.225171	0.0861545	0.28519	-1	3	USP10;CCL3
GO_Biological_Process_2018_	A	response to glucocorticoid (GO:0051384)	1/25	0.126675	0.253547	0.149359	0.304602	-1	3	IL1RN
GO_Biological_Process_2018_	A	regulation of vascular smooth muscle cell proliferation (GO:1904705)	1/26	0.131397	0.253547	0.15464	0.304602	-1	3	IGF1
GO_Biological_Process_2018_	A	receptor clustering (GO:0043113)	1/25	0.126675	0.253547	0.149359	0.304602	-1	3	MUSK
GO_Biological_Process_2018_	A	regulation of mitotic cell cycle (GO:0007346)	3/166	0.0610183	0.221518	0.087551	0.28519	-1	3	ANKRD53;EIF4EBP1;PTPN3
GO_Biological_Process_2018_	A	extracellular matrix disassembly (GO:0022617)	2/79	0.0680698	0.225171	0.0898969	0.28519	-1	3	ADAMTS4;LAMB3
GO_Biological_Process_2018_	A	nucleotide biosynthetic process (GO:0009165)	1/27	0.136093	0.255512	0.159888	0.30682	-1	3	ADCY2
GO_Biological_Process_2018_	A	mitotic sister chromatid segregation (GO:0000070)	2/83	0.0741616	0.231001	0.0975227	0.28519	-1	3	NAA50;ANKRD53
GO_Biological_Process_2018_	A	regulation of transcription regulatory region DNA binding (GO:2000677)	1/27	0.136093	0.255512	0.159888	0.30682	-1	3	IGF1
GO_Biological_Process_2018_	A	amino acid transmembrane transport (GO:0003333)	1/30	0.150033	0.267695	0.175441	0.319985	-2	3	SLC36A2
GO_Biological_Process_2018_	A	endocrine system development (GO:0035270)	1/27	0.136093	0.255512	0.159888	0.30682	-1	3	PAX8
GO_Biological_Process_2018_	A	GTP metabolic process (GO:0046039)	1/22	0.112356	0.25016	0.133319	0.300041	-1	3	MOCOS
GO_Biological_Process_2018_	A	cation transmembrane transport (GO:0098655)	1/27	0.136093	0.255512	0.159888	0.30682	-1	3	SLC36A2
GO_Biological_Process_2018_	A	dicarboxylic acid transport (GO:0006835)	1/30	0.150033	0.267695	0.175441	0.319985	-2	3	SLC1A3
GO_Biological_Process_2018_	A	glucose catabolic process to pyruvate (GO:0061718)	1/26	0.131397	0.253547	0.15464	0.304602	-1	3	HK2
GO_Biological_Process_2018_	A	cyclic purine nucleotide metabolic process (GO:0052652)	1/31	0.154629	0.270796	0.180562	0.32383	-2	3	ADCY2
GO_Biological_Process_2018_	A	regulation of receptor internalization (GO:0002090)	1/29	0.145411	0.26351	0.170289	0.31517	-1	3	VEGFA
GO_Biological_Process_2018_	A	cellular modified amino acid biosynthetic process (GO:0042398)	1/25	0.126675	0.253547	0.149359	0.304602	-1	3	GGCT
GO_Biological_Process_2018_	A	regulation of cell cycle G2/M phase transition (GO:1902749)	2/85	0.0772709	0.231001	0.101403	0.28519	-1	3	HAUS7;ATF5
GO_Biological_Process_2018_	A	regulation of lipid biosynthetic process (GO:0046890)	1/29	0.145411	0.26351	0.170289	0.31517	-1	3	ADIPOR2
GO_Biological_Process_2018_	A	positive regulation of sprouting angiogenesis (GO:1903672)	1/29	0.145411	0.26351	0.170289	0.31517	-1	3	VEGFA
GO_Biological_Process_2018_	A	glycolytic process through glucose-6-phosphate (GO:0061620)	1/26	0.131397	0.253547	0.15464	0.304602	-1	3	HK2
GO_Biological_Process_2018_	A	activation of protein kinase B activity (GO:0032148)	1/31	0.154629	0.270796	0.180562	0.32383	-2	3	IGF1
GO_Biological_Process_2018_	A	cellular response to glucose stimulus (GO:0071333)	1/28	0.140765	0.260846	0.165104	0.31223	-1	3	KCNB1
GO_Biological_Process_2018_	A	protein homooligomerization (GO:0051260)	3/191	0.0847807	0.233847	0.119275	0.294698	-1	3	NACC1;FGFRL1;ACACA
GO_Biological_Process_2018_	A	positive regulation of transcription from RNA polymerase II promoter in response to stress (GO:0036003)	1/30	0.150033	0.267695	0.175441	0.319985	-1	3	VEGFA
GO_Biological_Process_2018_	A	signal transduction in response to DNA damage (GO:0042770)	1/26	0.131397	0.253547	0.15464	0.304602	-1	3	USP10
GO_Biological_Process_2018_	A	monocarboxylic acid catabolic process (GO:0072329)	1/26	0.131397	0.253547	0.15464	0.304602	-1	3	LPIN1
GO_Biological_Process_2018_	A	cellular protein modification process (GO:0006464)	9/1002	0.0922204	0.237265	0.173544	0.319985	-1	3	DUSP4;DUSP2;TF;CISH;PSMD3;ALPK3;IP6K3;F5;PTPN3
GO_Biological_Process_2018_	A	eosinophil chemotaxis (GO:0048245)	1/25	0.126675	0.253547	0.149359	0.304602	-1	3	CCL3
GO_Biological_Process_2018_	A	cellular response to hormone stimulus (GO:0032870)	2/81	0.0710941	0.231001	0.0936869	0.28519	-1	3	PAX8;JUNB
GO_Biological_Process_2018_	A	canonical glycolysis (GO:0061621)	1/26	0.131397	0.253547	0.15464	0.304602	-1	3	HK2
GO_Biological_Process_2018_	A	cellular response to ketone (GO:1901655)	1/29	0.145411	0.26351	0.170289	0.31517	-1	3	ADCY2
GO_Biological_Process_2018_	A	phosphate-containing compound metabolic process (GO:0006796)	3/184	0.0777736	0.231001	0.109998	0.288928	-1	3	DUSP4;MOCOS;IP6K3
GO_Biological_Process_2018_	A	negative regulation of apoptotic process (GO:0043066)	6/486	0.0481834	0.221518	0.0847868	0.28519	-1	3	MUSK;PPIF;IGF1;ANGPTL4;ATF5;VEGFA
GO_Biological_Process_2018_	A	proton transport (GO:0015992)	1/32	0.159201	0.273291	0.185651	0.325124	-1	3	SLC36A2
GO_Biological_Process_2018_	A	triglyceride homeostasis (GO:0070328)	1/29	0.145411	0.26351	0.170289	0.31517	-1	3	ANGPTL4
GO_Biological_Process_2018_	A	positive regulation of interleukin-1 secretion (GO:0050716)	1/30	0.150033	0.267695	0.175441	0.319985	-1	3	CCL3
GO_Biological_Process_2018_	A	positive regulation of protein tyrosine kinase activity (GO:0061098)	1/29	0.145411	0.26351	0.170289	0.31517	-1	3	SRCIN1
GO_Biological_Process_2018_	A	regulation of p38MAPK cascade (GO:1900744)	1/27	0.136093	0.255512	0.159888	0.30682	-1	3	VEGFA
GO_Biological_Process_2018_	A	positive regulation of phosphorylation (GO:0042327)	3/209	0.10397	0.245107	0.144384	0.304602	-1	3	MUSK;IGF1;VEGFA
GO_Biological_Process_2018_	A	eosinophil migration (GO:0072677)	1/25	0.126675	0.253547	0.149359	0.304602	-1	3	CCL3
GO_Biological_Process_2018_	A	cyclic-nucleotide-mediated signaling (GO:0019935)	1/33	0.163749	0.276094	0.190709	0.32634	-1	3	ADCY2
GO_Biological_Process_2018_	A	regulation of cell migration involved in sprouting angiogenesis (GO:0090049)	1/31	0.154629	0.270796	0.180562	0.32383	-1	3	VEGFA
GO_Biological_Process_2018_	A	inner ear morphogenesis (GO:0042472)	1/23	0.117155	0.253547	0.138699	0.303622	-1	3	PAX8
GO_Biological_Process_2018_	A	positive regulation of fibroblast proliferation (GO:0048146)	1/29	0.145411	0.26351	0.170289	0.31517	-1	3	IGF1
GO_Biological_Process_2018_	A	negative regulation of myeloid leukocyte differentiation (GO:0002762)	1/28	0.140765	0.260846	0.165104	0.31223	-1	3	CCL3
GO_Biological_Process_2018_	A	lung development (GO:0030324)	1/30	0.150033	0.267695	0.175441	0.319985	-1	3	VEGFA
GO_Biological_Process_2018_	A	bile acid metabolic process (GO:0008206)	1/31	0.154629	0.270796	0.180562	0.32383	-1	3	SLC27A2
GO_Biological_Process_2018_	A	erythrocyte differentiation (GO:0030218)	1/36	0.177246	0.28768	0.205698	0.337539	-2	3	VEGFA
GO_Biological_Process_2018_	A	epithelium development (GO:0060429)	2/116	0.129957	0.253547	0.166044	0.313438	-1	3	PAX8;VEGFA
GO_Biological_Process_2018_	A	response to hexose (GO:0009746)	1/28	0.140765	0.260846	0.165104	0.31223	-1	3	IGF1
GO_Biological_Process_2018_	A	neutrophil degranulation (GO:0043312)	5/480	0.118478	0.253547	0.182249	0.325124	-1	3	ACLY;PSMD3;PRG2;ITGAX;SLC27A2
GO_Biological_Process_2018_	A	renal water homeostasis (GO:0003091)	1/32	0.159201	0.273291	0.185651	0.325124	-1	3	ADCY2
GO_Biological_Process_2018_	A	regulation of protein tyrosine kinase activity (GO:0061097)	1/32	0.159201	0.273291	0.185651	0.325124	-1	3	SRCIN1
GO_Biological_Process_2018_	A	organonitrogen compound biosynthetic process (GO:1901566)	3/182	0.0758208	0.231001	0.107402	0.288435	-1	3	MOCOS;LPIN1;GLUL
GO_Biological_Process_2018_	A	cellular amino acid biosynthetic process (GO:0008652)	1/29	0.145411	0.26351	0.170289	0.31517	-1	3	GLUL
GO_Biological_Process_2018_	A	regulation of transcription from RNA polymerase II promoter in response to stress (GO:0043618)	2/94	0.091749	0.237265	0.119365	0.294698	-1	3	PSMD3;VEGFA
GO_Biological_Process_2018_	A	positive regulation of cell migration (GO:0030335)	3/222	0.118801	0.253547	0.163517	0.31223	-1	3	CCL3;IGF1;VEGFA
GO_Biological_Process_2018_	A	regulation of neuron apoptotic process (GO:0043523)	2/90	0.0852196	0.233847	0.111285	0.288928	-1	3	KCNB1;CCL3
GO_Biological_Process_2018_	A	modulation by host of viral transcription (GO:0043921)	1/28	0.140765	0.260846	0.165104	0.31223	-1	3	CCL3
GO_Biological_Process_2018_	A	regulation of dendritic spine development (GO:0060998)	1/32	0.159201	0.273291	0.185651	0.325124	-1	3	SRCIN1
GO_Biological_Process_2018_	A	positive regulation of cell motility (GO:2000147)	3/180	0.0738902	0.231001	0.10483	0.28519	-1	3	CCL3;IGF1;VEGFA
GO_Biological_Process_2018_	A	negative regulation of cell-cell adhesion (GO:0022408)	1/32	0.159201	0.273291	0.185651	0.325124	-1	3	IL1RN
GO_Biological_Process_2018_	A	respiratory system development (GO:0060541)	1/30	0.150033	0.267695	0.175441	0.319985	-1	3	VEGFA
GO_Biological_Process_2018_	A	regulation of gene expression (GO:0010468)	9/1038	0.108492	0.249007	0.199589	0.335197	-1	2	C1QTNF1;MUSK;CCL3;ALPK3;ASCC2;IGF1;ATF5;FADS1;VEGFA
GO_Biological_Process_2018_	A	endodermal cell differentiation (GO:0035987)	1/33	0.163749	0.276094	0.190709	0.32634	-1	2	LAMB3
GO_Biological_Process_2018_	A	regulation of cation transmembrane transport (GO:1904062)	1/31	0.154629	0.270796	0.180562	0.32383	-1	2	PPIF
GO_Biological_Process_2018_	A	negative regulation of catalytic activity (GO:0043086)	1/27	0.136093	0.255512	0.159888	0.30682	-1	2	PLN
GO_Biological_Process_2018_	A	positive regulation of interleukin-1 beta production (GO:0032731)	1/32	0.159201	0.273291	0.185651	0.325124	-1	2	CCL3
GO_Biological_Process_2018_	A	positive regulation of tumor necrosis factor superfamily cytokine production (GO:1903557)	1/33	0.163749	0.276094	0.190709	0.32634	-1	2	CCL3
GO_Biological_Process_2018_	A	regulation of protein autophosphorylation (GO:0031952)	1/32	0.159201	0.273291	0.185651	0.325124	-1	2	VEGFA
GO_Biological_Process_2018_	A	positive regulation of cell growth (GO:0030307)	2/99	0.100109	0.242617	0.129664	0.300041	-1	2	IGF1;EIF4G2
GO_Biological_Process_2018_	A	neutrophil mediated immunity (GO:0002446)	5/488	0.124614	0.253547	0.190731	0.32634	-1	2	ACLY;PSMD3;PRG2;ITGAX;SLC27A2
GO_Biological_Process_2018_	A	phosphatidylcholine biosynthetic process (GO:0006656)	1/33	0.163749	0.276094	0.190709	0.32634	-1	2	LPIN1
GO_Biological_Process_2018_	A	retina homeostasis (GO:0001895)	1/39	0.190527	0.300802	0.220412	0.350105	-1	2	TF
GO_Biological_Process_2018_	A	regulation of glucose import (GO:0046324)	1/32	0.159201	0.273291	0.185651	0.325124	-1	2	IGF1
GO_Biological_Process_2018_	A	regulation of sodium ion transmembrane transport (GO:1902305)	1/31	0.154629	0.270796	0.180562	0.32383	-1	2	PTPN3
GO_Biological_Process_2018_	A	response to glucagon (GO:0033762)	1/35	0.172771	0.284404	0.200732	0.335197	-1	2	ADCY2
GO_Biological_Process_2018_	A	positive regulation of DNA replication (GO:0045740)	1/36	0.177246	0.28768	0.205698	0.337539	-1	2	IGF1
GO_Biological_Process_2018_	A	carboxylic acid metabolic process (GO:0019752)	1/34	0.168272	0.280993	0.195736	0.332178	-1	2	CYP1A2
GO_Biological_Process_2018_	A	regulation of MAPK cascade (GO:0043408)	3/204	0.0984772	0.242617	0.137239	0.303622	-1	2	GPR37;ADRB3;IGF1
GO_Biological_Process_2018_	A	negative regulation of hydrolase activity (GO:0051346)	2/109	0.117422	0.253547	0.150838	0.304602	-1	2	PLN;PPIF
GO_Biological_Process_2018_	A	mitochondrial transmembrane transport (GO:1990542)	1/33	0.163749	0.276094	0.190709	0.32634	-1	2	ACACA
GO_Biological_Process_2018_	A	vasculogenesis (GO:0001570)	1/33	0.163749	0.276094	0.190709	0.32634	-1	2	VEGFA
GO_Biological_Process_2018_	A	circulatory system development (GO:0072359)	2/110	0.119193	0.253547	0.152992	0.304602	-1	2	ALPK3;FOXL1
GO_Biological_Process_2018_	A	alpha-amino acid metabolic process (GO:1901605)	1/32	0.159201	0.273291	0.185651	0.325124	-1	2	SLC6A8
GO_Biological_Process_2018_	A	3'-phosphoadenosine 5'-phosphosulfate metabolic process (GO:0050427)	1/26	0.131397	0.253547	0.15464	0.304602	-1	2	SULT4A1
GO_Biological_Process_2018_	A	positive regulation of cell differentiation (GO:0045597)	3/195	0.0889024	0.235716	0.124704	0.298717	-1	2	PAX8;IGF1;JUNB
GO_Biological_Process_2018_	A	positive regulation of neuron death (GO:1901216)	1/39	0.190527	0.300802	0.220412	0.350105	-1	2	CCL3
GO_Biological_Process_2018_	A	epithelial tube morphogenesis (GO:0060562)	1/35	0.172771	0.284404	0.200732	0.335197	-1	2	VEGFA
GO_Biological_Process_2018_	A	positive regulation of calcium ion transport (GO:0051928)	1/34	0.168272	0.280993	0.195736	0.332178	-1	2	CCL3
GO_Biological_Process_2018_	A	cellular response to glucagon stimulus (GO:0071377)	1/33	0.163749	0.276094	0.190709	0.32634	-1	2	ADCY2
GO_Biological_Process_2018_	A	cofactor biosynthetic process (GO:0051188)	1/32	0.159201	0.273291	0.185651	0.325124	-1	2	MOCOS
GO_Biological_Process_2018_	A	negative regulation of calcium ion transmembrane transporter activity (GO:1901020)	1/33	0.163749	0.276094	0.190709	0.32634	-1	2	PLN
GO_Biological_Process_2018_	A	positive regulation of smooth muscle cell proliferation (GO:0048661)	1/38	0.186124	0.295192	0.215537	0.34341	-1	2	IGF1
GO_Biological_Process_2018_	A	carbohydrate catabolic process (GO:0016052)	1/36	0.177246	0.28768	0.205698	0.337539	-1	2	HK2
GO_Biological_Process_2018_	A	positive regulation of epithelial cell proliferation (GO:0050679)	2/108	0.115658	0.253547	0.148689	0.304602	-1	2	IGF1;VEGFA
GO_Biological_Process_2018_	A	positive regulation of cell-matrix adhesion (GO:0001954)	1/34	0.168272	0.280993	0.195736	0.332178	-1	2	VEGFA
GO_Biological_Process_2018_	A	regulation of cell differentiation (GO:0045595)	2/122	0.140937	0.260846	0.179284	0.32383	-1	2	JUNB;FADS1
GO_Biological_Process_2018_	A	positive regulation of DNA binding (GO:0043388)	1/35	0.172771	0.284404	0.200732	0.335197	-1	2	IGF1
GO_Biological_Process_2018_	A	regulation of synapse assembly (GO:0051963)	1/36	0.177246	0.28768	0.205698	0.337539	-1	2	MUSK
GO_Biological_Process_2018_	A	transferrin transport (GO:0033572)	1/37	0.181697	0.291274	0.210633	0.340449	-1	2	TF
GO_Biological_Process_2018_	A	regulation of axon extension (GO:0030516)	1/35	0.172771	0.284404	0.200732	0.335197	-1	2	NRCAM
GO_Biological_Process_2018_	A	regulation of sodium ion transmembrane transporter activity (GO:2000649)	1/38	0.186124	0.295192	0.215537	0.34341	-1	2	PTPN3
GO_Biological_Process_2018_	A	acyl-CoA metabolic process (GO:0006637)	1/40	0.194907	0.304487	0.225256	0.355094	-1	2	ACACA
GO_Biological_Process_2018_	A	regulation of cardiac muscle contraction (GO:0055117)	1/36	0.177246	0.28768	0.205698	0.337539	-1	2	PLN
GO_Biological_Process_2018_	A	regulation of cell migration (GO:0030334)	4/317	0.0928715	0.237265	0.13832	0.303622	-1	2	CCL3;IGF1;SRCIN1;VEGFA
GO_Biological_Process_2018_	A	positive regulation of osteoblast differentiation (GO:0045669)	1/36	0.177246	0.28768	0.205698	0.337539	-1	2	IGF1
GO_Biological_Process_2018_	A	protein peptidyl-prolyl isomerization (GO:0000413)	1/38	0.186124	0.295192	0.215537	0.34341	-1	2	PPIF
GO_Biological_Process_2018_	A	cellular response to calcium ion (GO:0071277)	1/43	0.207906	0.315798	0.239612	0.366631	-1	2	PPIF
GO_Biological_Process_2018_	A	positive regulation of leukocyte migration (GO:0002687)	1/35	0.172771	0.284404	0.200732	0.335197	-1	2	VEGFA
GO_Biological_Process_2018_	A	regulation of receptor-mediated endocytosis (GO:0048259)	1/37	0.181697	0.291274	0.210633	0.340449	-1	2	TF
GO_Biological_Process_2018_	A	positive regulation of neuron differentiation (GO:0045666)	2/99	0.100109	0.242617	0.129664	0.300041	-1	2	TENM3;NRCAM
GO_Biological_Process_2018_	A	endothelial cell migration (GO:0043542)	1/36	0.177246	0.28768	0.205698	0.337539	-1	2	VEGFA
GO_Biological_Process_2018_	A	organic cyclic compound biosynthetic process (GO:1901362)	1/38	0.186124	0.295192	0.215537	0.34341	-1	2	MOCOS
GO_Biological_Process_2018_	A	negative regulation of protein kinase activity (GO:0006469)	2/110	0.119193	0.253547	0.152992	0.304602	-1	2	CISH;SRCIN1
GO_Biological_Process_2018_	A	positive regulation of mitochondrion organization (GO:0010822)	2/129	0.153988	0.270796	0.194927	0.332178	-1	2	ITGAX;PPIF
GO_Biological_Process_2018_	A	regulation of mitotic spindle organization (GO:0060236)	1/36	0.177246	0.28768	0.205698	0.337539	-1	2	ANKRD53
GO_Biological_Process_2018_	A	sensory organ development (GO:0007423)	1/41	0.199263	0.306694	0.230071	0.356747	-1	2	PAX8
GO_Biological_Process_2018_	A	ferric iron transport (GO:0015682)	1/37	0.181697	0.291274	0.210633	0.340449	-1	2	TF
GO_Biological_Process_2018_	A	negative regulation of cytokine-mediated signaling pathway (GO:0001960)	1/41	0.199263	0.306694	0.230071	0.356747	-1	2	IL1RN
GO_Biological_Process_2018_	A	regulation of blood circulation (GO:1903522)	1/37	0.181697	0.291274	0.210633	0.340449	-1	2	PLN
GO_Biological_Process_2018_	A	regulation of fatty acid biosynthetic process (GO:0042304)	1/29	0.145411	0.26351	0.170289	0.31517	-1	2	ADIPOR2
GO_Biological_Process_2018_	A	positive regulation of gene expression (GO:0010628)	7/772	0.124326	0.253547	0.207867	0.340028	-1	2	C1QTNF1;PAX8;MUSK;CCL3;IGF1;ATF5;VEGFA
GO_Biological_Process_2018_	A	regulation of osteoclast differentiation (GO:0045670)	1/38	0.186124	0.295192	0.215537	0.34341	-1	2	CCL3
GO_Biological_Process_2018_	A	negative regulation of STAT cascade (GO:1904893)	1/42	0.203596	0.311066	0.234856	0.362012	-1	2	CISH
GO_Biological_Process_2018_	A	protein acetylation (GO:0006473)	1/34	0.168272	0.280993	0.195736	0.332178	-1	2	NAA50
GO_Biological_Process_2018_	A	artery morphogenesis (GO:0048844)	1/31	0.154629	0.270796	0.180562	0.32383	-1	2	VEGFA
GO_Biological_Process_2018_	A	phosphatidylinositol 3-kinase signaling (GO:0014065)	1/31	0.154629	0.270796	0.180562	0.32383	-1	2	IGF1
GO_Biological_Process_2018_	A	positive regulation of peptide hormone secretion (GO:0090277)	1/40	0.194907	0.304487	0.225256	0.355094	-1	2	RASL10B
GO_Biological_Process_2018_	A	inositol lipid-mediated signaling (GO:0048017)	1/40	0.194907	0.304487	0.225256	0.355094	-1	2	IGF1
GO_Biological_Process_2018_	A	extracellular matrix organization (GO:0030198)	3/230	0.128298	0.253547	0.175654	0.319985	-1	2	ADAMTS4;LAMB3;ITGAX
GO_Biological_Process_2018_	A	phospholipid biosynthetic process (GO:0008654)	1/38	0.186124	0.295192	0.215537	0.34341	-1	2	FADS1
GO_Biological_Process_2018_	A	glutamate receptor signaling pathway (GO:0007215)	1/37	0.181697	0.291274	0.210633	0.340449	-1	2	KCNB1
GO_Biological_Process_2018_	A	positive regulation of intracellular signal transduction (GO:1902533)	5/480	0.118478	0.253547	0.182249	0.325124	-1	2	GPR37;ADRB3;CCL3;IGF1;VEGFA
GO_Biological_Process_2018_	A	positive regulation of mitotic nuclear division (GO:0045840)	1/41	0.199263	0.306694	0.230071	0.356747	-1	2	IGF1
GO_Biological_Process_2018_	A	inositol phosphate metabolic process (GO:0043647)	1/48	0.22911	0.332034	0.262956	0.383753	-1	2	IP6K3
GO_Biological_Process_2018_	A	positive regulation of Ras protein signal transduction (GO:0046579)	1/41	0.199263	0.306694	0.230071	0.356747	-1	2	IGF1
GO_Biological_Process_2018_	A	peptidyl-proline modification (GO:0018208)	1/41	0.199263	0.306694	0.230071	0.356747	-1	2	PPIF
GO_Biological_Process_2018_	A	response to cAMP (GO:0051591)	1/41	0.199263	0.306694	0.230071	0.356747	-1	2	JUNB
GO_Biological_Process_2018_	A	response to hydrogen peroxide (GO:0042542)	1/44	0.212192	0.319977	0.244338	0.371138	-1	2	PPIF
GO_Biological_Process_2018_	A	negative regulation of macromolecule metabolic process (GO:0010605)	2/125	0.1465	0.265023	0.185964	0.325125	-1	2	CCL3;VEGFA
GO_Biological_Process_2018_	A	regulation of protein secretion (GO:0050708)	2/108	0.115658	0.253547	0.148689	0.304602	-1	2	KCNB1;IGF1
GO_Biological_Process_2018_	A	response to peptide hormone (GO:0043434)	1/41	0.199263	0.306694	0.230071	0.356747	-1	2	IGF1
GO_Biological_Process_2018_	A	muscle cell differentiation (GO:0042692)	1/37	0.181697	0.291274	0.210633	0.340449	-1	2	IGF1
GO_Biological_Process_2018_	A	cellular response to peptide (GO:1901653)	1/42	0.203596	0.311066	0.234856	0.362012	-1	2	IGF1
GO_Biological_Process_2018_	A	positive regulation of cell development (GO:0010720)	1/35	0.172771	0.284404	0.200732	0.335197	-1	2	IGF1
GO_Biological_Process_2018_	A	negative regulation of blood coagulation (GO:0030195)	1/37	0.181697	0.291274	0.210633	0.340449	-1	2	C1QTNF1
GO_Biological_Process_2018_	A	regulation of activated T cell proliferation (GO:0046006)	1/30	0.150033	0.267695	0.175441	0.319985	-1	2	IGF1
GO_Biological_Process_2018_	A	negative regulation of epidermal growth factor receptor signaling pathway (GO:0042059)	1/41	0.199263	0.306694	0.230071	0.356747	-1	2	PTPN3
GO_Biological_Process_2018_	A	regulation of smooth muscle cell proliferation (GO:0048660)	1/45	0.216456	0.323597	0.249036	0.374452	-1	2	IGF1
GO_Biological_Process_2018_	A	regulation of focal adhesion assembly (GO:0051893)	1/45	0.216456	0.323597	0.249036	0.374452	-1	2	VEGFA
GO_Biological_Process_2018_	A	positive regulation of blood vessel endothelial cell migration (GO:0043536)	1/46	0.220696	0.328054	0.253704	0.379283	-1	2	VEGFA
GO_Biological_Process_2018_	A	negative regulation of ERBB signaling pathway (GO:1901185)	1/44	0.212192	0.319977	0.244338	0.371138	-1	2	PTPN3
GO_Biological_Process_2018_	A	translesion synthesis (GO:0019985)	1/43	0.207906	0.315798	0.239612	0.366631	-1	2	USP10
GO_Biological_Process_2018_	A	G-protein coupled receptor signaling pathway, coupled to cyclic nucleotide second messenger (GO:0007187)	2/126	0.148365	0.267695	0.188199	0.32634	-1	2	ADRB3;ADCY2
GO_Biological_Process_2018_	A	signal transduction by p53 class mediator (GO:0072331)	1/40	0.194907	0.304487	0.225256	0.355094	-1	2	USP10
GO_Biological_Process_2018_	A	nuclear envelope disassembly (GO:0051081)	1/47	0.224914	0.330085	0.258344	0.381296	-1	2	LPIN1
GO_Biological_Process_2018_	A	mitotic nuclear envelope disassembly (GO:0007077)	1/45	0.216456	0.323597	0.249036	0.374452	-1	2	LPIN1
GO_Biological_Process_2018_	A	regulation of fibroblast proliferation (GO:0048145)	1/47	0.224914	0.330085	0.258344	0.381296	-1	2	IGF1
GO_Biological_Process_2018_	A	negative regulation of ERK1 and ERK2 cascade (GO:0070373)	1/41	0.199263	0.306694	0.230071	0.356747	-1	2	DUSP4
GO_Biological_Process_2018_	A	positive regulation of tumor necrosis factor production (GO:0032760)	1/48	0.22911	0.332034	0.262956	0.383753	-1	2	CCL3
GO_Biological_Process_2018_	A	neutrophil activation involved in immune response (GO:0002283)	5/484	0.121528	0.253547	0.186472	0.325467	-1	2	ACLY;PSMD3;PRG2;ITGAX;SLC27A2
GO_Biological_Process_2018_	A	mitotic metaphase plate congression (GO:0007080)	1/44	0.212192	0.319977	0.244338	0.371138	-1	2	ANKRD53
GO_Biological_Process_2018_	A	cellular calcium ion homeostasis (GO:0006874)	2/124	0.144641	0.26351	0.183733	0.325124	-1	2	PLN;CCL3
GO_Biological_Process_2018_	A	regulation of microtubule polymerization (GO:0031113)	1/36	0.177246	0.28768	0.205698	0.337539	-1	2	ANKRD53
GO_Biological_Process_2018_	A	negative regulation of transport (GO:0051051)	1/41	0.199263	0.306694	0.230071	0.356747	-1	2	HAMP
GO_Biological_Process_2018_	A	regulation of interleukin-1 beta secretion (GO:0050706)	1/35	0.172771	0.284404	0.200732	0.335197	-1	2	CCL3
GO_Biological_Process_2018_	A	regulation of macromolecule metabolic process (GO:0060255)	2/130	0.155871	0.272513	0.197176	0.334078	-1	2	ALPK3;IGF1
GO_Biological_Process_2018_	A	negative regulation of protein catabolic process (GO:0042177)	1/40	0.194907	0.304487	0.225256	0.355094	-1	2	PTPN3
GO_Biological_Process_2018_	A	negative regulation of JAK-STAT cascade (GO:0046426)	1/48	0.22911	0.332034	0.262956	0.383753	-1	2	CISH
GO_Biological_Process_2018_	A	activation of protein kinase activity (GO:0032147)	3/234	0.133146	0.255512	0.181816	0.325124	-1	2	ADCY2;IGF1;VEGFA
GO_Biological_Process_2018_	A	sensory perception (GO:0007600)	1/55	0.257854	0.358723	0.294451	0.411836	-1	2	NTSR2
GO_Biological_Process_2018_	A	negative regulation of ossification (GO:0030279)	1/46	0.220696	0.328054	0.253704	0.379283	-1	2	CCL3
GO_Biological_Process_2018_	A	intraciliary transport (GO:0042073)	1/47	0.224914	0.330085	0.258344	0.381296	-1	2	ALPK3
GO_Biological_Process_2018_	A	generation of neurons (GO:0048699)	2/131	0.157759	0.273291	0.199429	0.335197	-1	2	TUBB3;NRCAM
GO_Biological_Process_2018_	A	postreplication repair (GO:0006301)	1/48	0.22911	0.332034	0.262956	0.383753	-1	2	USP10
GO_Biological_Process_2018_	A	negative regulation of protein secretion (GO:0050709)	1/43	0.207906	0.315798	0.239612	0.366631	-1	2	KCNB1
GO_Biological_Process_2018_	A	regulation of cellular amine metabolic process (GO:0033238)	1/52	0.245667	0.347606	0.281119	0.400172	-1	2	PSMD3
GO_Biological_Process_2018_	A	regulation of calcium-mediated signaling (GO:0050848)	1/42	0.203596	0.311066	0.234856	0.362012	-1	2	CCL3
GO_Biological_Process_2018_	A	regulation of cellular amino acid metabolic process (GO:0006521)	1/52	0.245667	0.347606	0.281119	0.400172	-1	2	PSMD3
GO_Biological_Process_2018_	A	cellular response to hypoxia (GO:0071456)	2/133	0.161548	0.276094	0.203944	0.337539	-1	2	PSMD3;VEGFA
GO_Biological_Process_2018_	A	regulation of apoptotic process (GO:0042981)	7/816	0.152434	0.270796	0.248143	0.374452	-1	2	PAX8;MUSK;PPIF;IGF1;ANGPTL4;ATF5;VEGFA
GO_Biological_Process_2018_	A	post-translational protein modification (GO:0043687)	4/358	0.128826	0.253547	0.186815	0.325521	-1	2	TF;CISH;PSMD3;F5
GO_Biological_Process_2018_	A	fatty acid beta-oxidation (GO:0006635)	1/51	0.241561	0.343861	0.27662	0.395932	-1	2	SLC27A2
GO_Biological_Process_2018_	A	polyol metabolic process (GO:0019751)	1/48	0.22911	0.332034	0.262956	0.383753	-1	2	IP6K3
GO_Biological_Process_2018_	A	regulation of dendrite morphogenesis (GO:0048814)	1/45	0.216456	0.323597	0.249036	0.374452	-1	2	SRCIN1
GO_Biological_Process_2018_	A	heart morphogenesis (GO:0003007)	1/51	0.241561	0.343861	0.27662	0.395932	-1	2	VEGFA
GO_Biological_Process_2018_	A	regulation of blood vessel endothelial cell migration (GO:0043535)	1/51	0.241561	0.343861	0.27662	0.395932	-1	2	VEGFA
GO_Biological_Process_2018_	A	nicotinamide nucleotide metabolic process (GO:0046496)	1/46	0.220696	0.328054	0.253704	0.379283	-1	2	HK2
GO_Biological_Process_2018_	A	positive regulation of tyrosine phosphorylation of STAT protein (GO:0042531)	1/54	0.253813	0.354047	0.290034	0.40675	-1	2	IGF1
GO_Biological_Process_2018_	A	positive regulation of ion transport (GO:0043270)	1/47	0.224914	0.330085	0.258344	0.381296	-1	2	CCL3
GO_Biological_Process_2018_	A	regulation of cellular component movement (GO:0051270)	1/47	0.224914	0.330085	0.258344	0.381296	-1	2	VEGFA
GO_Biological_Process_2018_	A	regulation of metal ion transport (GO:0010959)	1/38	0.186124	0.295192	0.215537	0.34341	-1	2	PLN
GO_Biological_Process_2018_	A	negative regulation of mitotic cell cycle (GO:0045930)	1/49	0.233282	0.336211	0.267539	0.388808	-1	2	PTPN3
GO_Biological_Process_2018_	A	arachidonic acid metabolic process (GO:0019369)	1/52	0.245667	0.347606	0.281119	0.400172	-1	2	CYP1A2
GO_Biological_Process_2018_	A	negative regulation of I-kappaB kinase/NF-kappaB signaling (GO:0043124)	1/48	0.22911	0.332034	0.262956	0.383753	-1	2	USP10
GO_Biological_Process_2018_	A	digestive tract development (GO:0048565)	1/44	0.212192	0.319977	0.244338	0.371138	-1	2	CLMP
GO_Biological_Process_2018_	A	regulation of intrinsic apoptotic signaling pathway (GO:2001242)	1/48	0.22911	0.332034	0.262956	0.383753	-1	2	PPIF
GO_Biological_Process_2018_	A	lymphocyte chemotaxis (GO:0048247)	1/45	0.216456	0.323597	0.249036	0.374452	-1	2	CCL3
GO_Biological_Process_2018_	A	glutathione metabolic process (GO:0006749)	1/50	0.237433	0.341248	0.272093	0.393233	-1	1	GGCT
GO_Biological_Process_2018_	A	heterophilic cell-cell adhesion via plasma membrane cell adhesion molecules (GO:0007157)	1/48	0.22911	0.332034	0.262956	0.383753	-1	1	TENM3
GO_Biological_Process_2018_	A	skeletal system development (GO:0001501)	2/147	0.188496	0.2985	0.235827	0.362971	-1	1	ADAMTS4;IGF1
GO_Biological_Process_2018_	A	establishment of protein localization to organelle (GO:0072594)	1/63	0.289405	0.386121	0.328818	0.439831	-1	1	HK2
GO_Biological_Process_2018_	A	positive regulation of intracellular protein transport (GO:0090316)	2/153	0.200232	0.307731	0.24959	0.374744	-1	1	KCNB1;ITGAX
GO_Biological_Process_2018_	A	transmembrane receptor protein tyrosine kinase signaling pathway (GO:0007169)	4/397	0.167586	0.280993	0.2373	0.364699	-1	1	MUSK;IGF1;FGFRL1;VEGFA
GO_Biological_Process_2018_	A	cellular response to organic cyclic compound (GO:0071407)	2/136	0.167263	0.280993	0.210739	0.340449	-1	1	CCL3;ADCY2
GO_Biological_Process_2018_	A	regulation of G2/M transition of mitotic cell cycle (GO:0010389)	2/150	0.194352	0.304487	0.242704	0.370817	-1	1	HAUS7;PSMD3
GO_Biological_Process_2018_	A	blood circulation (GO:0008015)	1/51	0.241561	0.343861	0.27662	0.395932	-1	1	PLN
GO_Biological_Process_2018_	A	pyruvate metabolic process (GO:0006090)	1/47	0.224914	0.330085	0.258344	0.381296	-1	1	HK2
GO_Biological_Process_2018_	A	icosanoid metabolic process (GO:0006690)	1/47	0.224914	0.330085	0.258344	0.381296	-1	1	FADS1
GO_Biological_Process_2018_	A	positive regulation of chemotaxis (GO:0050921)	1/49	0.233282	0.336211	0.267539	0.388808	-1	1	VEGFA
GO_Biological_Process_2018_	A	negative regulation of autophagy (GO:0010507)	1/47	0.224914	0.330085	0.258344	0.381296	-1	1	EIF4G2
GO_Biological_Process_2018_	A	regulation of protein metabolic process (GO:0051246)	1/60	0.277732	0.376819	0.316128	0.430034	-1	1	PRG2
GO_Biological_Process_2018_	A	regulation of tyrosine phosphorylation of STAT protein (GO:0042509)	1/62	0.285535	0.382919	0.324614	0.436449	-1	1	IGF1
GO_Biological_Process_2018_	A	regulation of calcium ion-dependent exocytosis (GO:0017158)	1/54	0.253813	0.354047	0.290034	0.40675	-1	1	KCNB1
GO_Biological_Process_2018_	A	regulation of bone mineralization (GO:0030500)	1/51	0.241561	0.343861	0.27662	0.395932	-1	1	CCL3
GO_Biological_Process_2018_	A	positive regulation of ossification (GO:0045778)	1/53	0.249751	0.351349	0.28559	0.403779	-1	1	IGF1
GO_Biological_Process_2018_	A	positive regulation of developmental growth (GO:0048639)	1/52	0.245667	0.347606	0.281119	0.400172	-1	1	IGF1
GO_Biological_Process_2018_	A	regulation of axonogenesis (GO:0050770)	1/56	0.261872	0.36286	0.29884	0.415742	-1	1	NRCAM
GO_Biological_Process_2018_	A	cellular response to organic substance (GO:0071310)	2/134	0.163449	0.276094	0.206206	0.337841	-1	1	CCL3;JUNB
GO_Biological_Process_2018_	A	monocyte chemotaxis (GO:0002548)	1/42	0.203596	0.311066	0.234856	0.362012	-1	1	CCL3
GO_Biological_Process_2018_	A	regulation of glycolytic process (GO:0006110)	1/58	0.269845	0.369485	0.307537	0.422206	-1	1	IGF1
GO_Biological_Process_2018_	A	regulation of epidermal growth factor receptor signaling pathway (GO:0042058)	1/59	0.273799	0.373917	0.311846	0.426996	-1	1	PTPN3
GO_Biological_Process_2018_	A	cell-cell adhesion via plasma-membrane adhesion molecules (GO:0098742)	2/143	0.180728	0.291274	0.226677	0.356747	-1	1	TENM3;FGFRL1
GO_Biological_Process_2018_	A	positive regulation of protein transport (GO:0051222)	1/57	0.265869	0.365483	0.303202	0.418459	-1	1	IGF1
GO_Biological_Process_2018_	A	myeloid leukocyte differentiation (GO:0002573)	1/51	0.241561	0.343861	0.27662	0.395932	-1	1	VEGFA
GO_Biological_Process_2018_	A	muscle contraction (GO:0006936)	2/138	0.171092	0.284404	0.215281	0.34341	-1	1	SLC6A8;MYH11
GO_Biological_Process_2018_	A	establishment of protein localization to mitochondrion (GO:0072655)	1/50	0.237433	0.341248	0.272093	0.393233	-1	1	HK2
GO_Biological_Process_2018_	A	regulation of cytosolic calcium ion concentration (GO:0051480)	2/138	0.171092	0.284404	0.215281	0.34341	-1	1	PLN;C1QTNF1
GO_Biological_Process_2018_	A	monocarboxylic acid transport (GO:0015718)	1/54	0.253813	0.354047	0.290034	0.40675	-1	1	SLC16A7
GO_Biological_Process_2018_	A	positive regulation of phosphatidylinositol 3-kinase signaling (GO:0014068)	1/54	0.253813	0.354047	0.290034	0.40675	-1	1	IGF1
GO_Biological_Process_2018_	A	positive regulation of protein import into nucleus (GO:0042307)	1/54	0.253813	0.354047	0.290034	0.40675	-1	1	IGF1
GO_Biological_Process_2018_	A	metaphase plate congression (GO:0051310)	1/45	0.216456	0.323597	0.249036	0.374452	-1	1	ANKRD53
GO_Biological_Process_2018_	A	phosphatidylinositol-mediated signaling (GO:0048015)	1/57	0.265869	0.365483	0.303202	0.418459	-1	1	IGF1
GO_Biological_Process_2018_	A	action potential (GO:0001508)	1/55	0.257854	0.358723	0.294451	0.411836	-1	1	KCNB1
GO_Biological_Process_2018_	A	chemokine-mediated signaling pathway (GO:0070098)	1/53	0.249751	0.351349	0.28559	0.403779	-1	1	CCL3
GO_Biological_Process_2018_	A	regulation of cellular ketone metabolic process (GO:0010565)	1/62	0.285535	0.382919	0.324614	0.436449	-1	1	PSMD3
GO_Biological_Process_2018_	A	cell morphogenesis (GO:0000902)	1/60	0.277732	0.376819	0.316128	0.430034	-1	1	TENM3
GO_Biological_Process_2018_	A	axon guidance (GO:0007411)	2/159	0.212052	0.319977	0.26338	0.383835	-1	1	TUBB3;VEGFA
GO_Biological_Process_2018_	A	negative regulation of G2/M transition of mitotic cell cycle (GO:0010972)	1/63	0.289405	0.386121	0.328818	0.439831	-1	1	PSMD3
GO_Biological_Process_2018_	A	regulation of JAK-STAT cascade (GO:0046425)	1/66	0.300892	0.391911	0.341274	0.446183	-1	1	CISH
GO_Biological_Process_2018_	A	neutrophil chemotaxis (GO:0030593)	1/54	0.253813	0.354047	0.290034	0.40675	-1	1	CCL3
GO_Biological_Process_2018_	A	regulation of ERK1 and ERK2 cascade (GO:0070372)	3/248	0.150602	0.268252	0.203827	0.337539	-1	1	DUSP4;MUSK;CCL3
GO_Biological_Process_2018_	A	chordate embryonic development (GO:0043009)	1/57	0.265869	0.365483	0.303202	0.418459	-1	1	VEGFA
GO_Biological_Process_2018_	A	organonitrogen compound catabolic process (GO:1901565)	1/57	0.265869	0.365483	0.303202	0.418459	-1	1	CYP3A5
GO_Biological_Process_2018_	A	chloride transmembrane transport (GO:1902476)	1/58	0.269845	0.369485	0.307537	0.422206	-1	1	SLC1A3
GO_Biological_Process_2018_	A	positive regulation of JAK-STAT cascade (GO:0046427)	1/65	0.297083	0.389385	0.337147	0.443011	-1	1	IGF1
GO_Biological_Process_2018_	A	sterol metabolic process (GO:0016125)	1/60	0.277732	0.376819	0.316128	0.430034	-1	1	DHCR7
GO_Biological_Process_2018_	A	regulation of tumor necrosis factor production (GO:0032680)	1/62	0.285535	0.382919	0.324614	0.436449	-1	1	CCL3
GO_Biological_Process_2018_	A	mitochondrion organization (GO:0007005)	2/168	0.229905	0.332724	0.284073	0.403275	-1	1	PPIF;HK2
GO_Biological_Process_2018_	A	cilium assembly (GO:0060271)	3/289	0.205368	0.313314	0.271226	0.393071	-1	1	HAUS7;ALPK3;PARVA
GO_Biological_Process_2018_	A	regulation of cellular catabolic process (GO:0031329)	1/56	0.261872	0.36286	0.29884	0.415742	-1	1	USP10
GO_Biological_Process_2018_	A	dicarboxylic acid metabolic process (GO:0043648)	1/60	0.277732	0.376819	0.316128	0.430034	-1	1	ACLY
GO_Biological_Process_2018_	A	regulation of mitotic cell cycle phase transition (GO:1901990)	2/185	0.263858	0.365126	0.322989	0.436449	-1	1	HAUS7;PSMD3
GO_Biological_Process_2018_	A	negative regulation of intracellular signal transduction (GO:1902532)	2/162	0.217989	0.325422	0.270279	0.392244	-1	1	USP10;PPIF
GO_Biological_Process_2018_	A	MAPK cascade (GO:0000165)	3/279	0.191583	0.302012	0.254485	0.379905	-1	1	PSMD3;CCL3;IGF1
GO_Biological_Process_2018_	A	protein autophosphorylation (GO:0046777)	2/176	0.245859	0.347606	0.30243	0.418459	-1	1	MUSK;ALPK3
GO_Biological_Process_2018_	A	regulation of DNA binding (GO:0051101)	1/53	0.249751	0.351349	0.28559	0.403779	-1	1	IGF1
GO_Biological_Process_2018_	A	regulation of cardiac conduction (GO:1903779)	1/68	0.308447	0.399753	0.349451	0.45516	-1	1	PLN
GO_Biological_Process_2018_	A	actin cytoskeleton reorganization (GO:0031532)	1/62	0.285535	0.382919	0.324614	0.436449	-1	1	PARVA
GO_Biological_Process_2018_	A	protein homotetramerization (GO:0051289)	1/58	0.269845	0.369485	0.307537	0.422206	-1	1	ACACA
GO_Biological_Process_2018_	A	negative regulation of intrinsic apoptotic signaling pathway (GO:2001243)	1/63	0.289405	0.386121	0.328818	0.439831	-1	1	PPIF
GO_Biological_Process_2018_	A	fat cell differentiation (GO:0045444)	1/56	0.261872	0.36286	0.29884	0.415742	-1	1	ATF5
GO_Biological_Process_2018_	A	second-messenger-mediated signaling (GO:0019932)	1/63	0.289405	0.386121	0.328818	0.439831	-1	1	CCL3
GO_Biological_Process_2018_	A	positive regulation of protein kinase activity (GO:0045860)	2/173	0.23987	0.343861	0.295553	0.412823	-1	1	SRCIN1;VEGFA
GO_Biological_Process_2018_	A	glycerophospholipid metabolic process (GO:0006650)	1/65	0.297083	0.389385	0.337147	0.443011	-1	1	IP6K3
GO_Biological_Process_2018_	A	synapse assembly (GO:0007416)	1/64	0.293255	0.388274	0.332995	0.442014	-1	1	NRCAM
GO_Biological_Process_2018_	A	phosphatidylcholine metabolic process (GO:0046470)	1/72	0.323315	0.409847	0.365505	0.466042	-1	1	LPIN1
GO_Biological_Process_2018_	A	muscle organ development (GO:0007517)	1/61	0.281644	0.381134	0.320384	0.434688	-1	1	IGF1
GO_Biological_Process_2018_	A	granulocyte chemotaxis (GO:0071621)	1/57	0.265869	0.365483	0.303202	0.418459	-1	1	CCL3
GO_Biological_Process_2018_	A	neutrophil migration (GO:1990266)	1/59	0.273799	0.373917	0.311846	0.426996	-1	1	CCL3
GO_Biological_Process_2018_	A	vesicle coating (GO:0006901)	1/64	0.293255	0.388274	0.332995	0.442014	-1	1	F5
GO_Biological_Process_2018_	A	vesicle targeting, rough ER to cis-Golgi (GO:0048207)	1/64	0.293255	0.388274	0.332995	0.442014	-1	1	F5
GO_Biological_Process_2018_	A	histone acetylation (GO:0016573)	1/72	0.323315	0.409847	0.365505	0.466042	-1	1	NAA50
GO_Biological_Process_2018_	A	positive regulation of cell adhesion (GO:0045785)	1/65	0.297083	0.389385	0.337147	0.443011	-1	1	VEGFA
GO_Biological_Process_2018_	A	response to organic cyclic compound (GO:0014070)	1/70	0.315921	0.405905	0.357527	0.462213	-1	1	CCL3
GO_Biological_Process_2018_	A	positive regulation of T cell proliferation (GO:0042102)	1/62	0.285535	0.382919	0.324614	0.436449	-1	1	IGF1
GO_Biological_Process_2018_	A	regulation of proteolysis (GO:0030162)	1/64	0.293255	0.388274	0.332995	0.442014	-1	1	TM4SF20
GO_Biological_Process_2018_	A	positive regulation of endothelial cell migration (GO:0010595)	1/71	0.319628	0.408366	0.361528	0.463932	-1	1	VEGFA
GO_Biological_Process_2018_	A	regulation of extrinsic apoptotic signaling pathway (GO:2001236)	1/60	0.277732	0.376819	0.316128	0.430034	-1	1	IGF1
GO_Biological_Process_2018_	A	regulation of protein complex assembly (GO:0043254)	1/74	0.33063	0.41458	0.373384	0.471025	-1	1	VEGFA
GO_Biological_Process_2018_	A	regulation of osteoblast differentiation (GO:0045667)	1/70	0.315921	0.405905	0.357527	0.462213	-1	1	IGF1
GO_Biological_Process_2018_	A	negative regulation of ubiquitin-protein ligase activity involved in mitotic cell cycle (GO:0051436)	1/72	0.323315	0.409847	0.365505	0.466042	-1	1	PSMD3
GO_Biological_Process_2018_	A	homophilic cell adhesion via plasma membrane adhesion molecules (GO:0007156)	1/65	0.297083	0.389385	0.337147	0.443011	-1	1	TENM3
GO_Biological_Process_2018_	A	COPII vesicle coating (GO:0048208)	1/64	0.293255	0.388274	0.332995	0.442014	-1	1	F5
GO_Biological_Process_2018_	A	fibroblast growth factor receptor signaling pathway (GO:0008543)	1/79	0.348576	0.425312	0.392662	0.483062	-1	1	FGFRL1
GO_Biological_Process_2018_	A	positive regulation of endocytosis (GO:0045807)	1/65	0.297083	0.389385	0.337147	0.443011	-1	1	TF
GO_Biological_Process_2018_	A	positive regulation of growth (GO:0045927)	1/72	0.323315	0.409847	0.365505	0.466042	-1	1	EIF4G2
GO_Biological_Process_2018_	A	cellular response to reactive oxygen species (GO:0034614)	1/66	0.300892	0.391911	0.341274	0.446183	-1	1	PPIF
GO_Biological_Process_2018_	A	positive regulation of endothelial cell proliferation (GO:0001938)	1/68	0.308447	0.399753	0.349451	0.45516	-1	1	VEGFA
GO_Biological_Process_2018_	A	positive regulation of cell projection organization (GO:0031346)	1/64	0.293255	0.388274	0.332995	0.442014	-1	1	TENM3
GO_Biological_Process_2018_	A	DNA synthesis involved in DNA repair (GO:0000731)	1/66	0.300892	0.391911	0.341274	0.446183	-1	1	USP10
GO_Biological_Process_2018_	A	vascular endothelial growth factor receptor signaling pathway (GO:0048010)	1/71	0.319628	0.408366	0.361528	0.463932	-1	1	VEGFA
GO_Biological_Process_2018_	A	SCF-dependent proteasomal ubiquitin-dependent protein catabolic process (GO:0031146)	1/73	0.326982	0.412488	0.369457	0.468338	-1	1	PSMD3
GO_Biological_Process_2018_	A	positive regulation of inflammatory response (GO:0050729)	1/74	0.33063	0.41458	0.373384	0.471025	-1	1	CCL3
GO_Biological_Process_2018_	A	phospholipid metabolic process (GO:0006644)	1/71	0.319628	0.408366	0.361528	0.463932	-1	1	FADS1
GO_Biological_Process_2018_	A	calcium-mediated signaling (GO:0019722)	1/71	0.319628	0.408366	0.361528	0.463932	-1	1	CCL3
GO_Biological_Process_2018_	A	positive regulation of DNA metabolic process (GO:0051054)	1/83	0.362589	0.430807	0.407661	0.487136	-1	1	IGF1
GO_Biological_Process_2018_	A	positive regulation of protein polymerization (GO:0032273)	1/65	0.297083	0.389385	0.337147	0.443011	-1	1	ANKRD53
GO_Biological_Process_2018_	A	response to insulin (GO:0032868)	1/72	0.323315	0.409847	0.365505	0.466042	-1	1	IGF1
GO_Biological_Process_2018_	A	regulation of DNA replication (GO:0006275)	1/62	0.285535	0.382919	0.324614	0.436449	-1	1	IGF1
GO_Biological_Process_2018_	A	gland development (GO:0048732)	1/76	0.337866	0.418617	0.381167	0.47623	-1	1	PAX8
GO_Biological_Process_2018_	A	inorganic anion transmembrane transport (GO:0098661)	1/65	0.297083	0.389385	0.337147	0.443011	-1	1	SLC1A3
GO_Biological_Process_2018_	A	positive regulation of defense response (GO:0031349)	1/75	0.334258	0.417622	0.377288	0.474799	-1	1	CCL3
GO_Biological_Process_2018_	A	positive regulation of MAP kinase activity (GO:0043406)	2/178	0.249856	0.351349	0.307009	0.422206	-1	1	IGF1;VEGFA
GO_Biological_Process_2018_	A	nervous system development (GO:0007399)	4/456	0.232759	0.336211	0.318661	0.432913	-1	1	PAX8;PCDH10;NRCAM;VEGFA
GO_Biological_Process_2018_	A	positive regulation of protein modification process (GO:0031401)	2/164	0.221955	0.329455	0.274878	0.395932	-1	1	MUSK;VEGFA
GO_Biological_Process_2018_	A	spindle assembly (GO:0051225)	1/81	0.35562	0.428389	0.400208	0.484903	-1	1	HAUS7
GO_Biological_Process_2018_	A	negative regulation of mitotic cell cycle phase transition (GO:1901991)	1/80	0.352108	0.42712	0.396446	0.484148	-1	1	PSMD3
GO_Biological_Process_2018_	A	COPII-coated vesicle budding (GO:0090114)	1/69	0.312194	0.402606	0.353502	0.458716	-1	1	F5
GO_Biological_Process_2018_	A	negative regulation of ubiquitin protein ligase activity (GO:1904667)	1/78	0.345025	0.42296	0.388854	0.480647	-1	1	PSMD3
GO_Biological_Process_2018_	A	positive regulation of ubiquitin-protein ligase activity involved in regulation of mitotic cell cycle transition (GO:0051437)	1/77	0.341455	0.42007	0.385022	0.47818	-1	1	PSMD3
GO_Biological_Process_2018_	A	central nervous system development (GO:0007417)	2/218	0.329631	0.41458	0.396797	0.484148	-1	1	PAX8;NRCAM
GO_Biological_Process_2018_	A	NIK/NF-kappaB signaling (GO:0038061)	1/81	0.35562	0.428389	0.400208	0.484903	-1	1	PSMD3
GO_Biological_Process_2018_	A	regulation of endothelial cell proliferation (GO:0001936)	1/80	0.352108	0.42712	0.396446	0.484148	-1	1	VEGFA
GO_Biological_Process_2018_	A	response to interferon-gamma (GO:0034341)	1/69	0.312194	0.402606	0.353502	0.458716	-1	1	CCL3
GO_Biological_Process_2018_	A	anaphase-promoting complex-dependent catabolic process (GO:0031145)	1/80	0.352108	0.42712	0.396446	0.484148	-1	1	PSMD3
GO_Biological_Process_2018_	A	regulation of hematopoietic progenitor cell differentiation (GO:1901532)	1/78	0.345025	0.42296	0.388854	0.480647	-1	1	PSMD3
GO_Biological_Process_2018_	A	positive regulation of protein targeting to mitochondrion (GO:1903955)	1/82	0.359114	0.430606	0.403946	0.487136	-1	1	ITGAX
GO_Biological_Process_2018_	A	cilium organization (GO:0044782)	2/193	0.279865	0.37922	0.341142	0.446183	-1	1	ALPK3;PARVA
GO_Biological_Process_2018_	A	positive regulation of ubiquitin protein ligase activity (GO:1904668)	1/83	0.362589	0.430807	0.407661	0.487136	-1	1	PSMD3
GO_Biological_Process_2018_	A	positive regulation of cellular component biogenesis (GO:0044089)	1/88	0.379686	0.445032	0.425895	0.502017	-1	1	VEGFA
GO_Biological_Process_2018_	A	negative regulation of phosphorylation (GO:0042326)	1/76	0.337866	0.418617	0.381167	0.47623	-1	1	PPIF
GO_Biological_Process_2018_	A	positive regulation of binding (GO:0051099)	1/82	0.359114	0.430606	0.403946	0.487136	-1	1	IGF1
GO_Biological_Process_2018_	A	positive regulation of apoptotic signaling pathway (GO:2001235)	1/77	0.341455	0.42007	0.385022	0.47818	-1	1	PPIF
GO_Biological_Process_2018_	A	C-terminal protein lipidation (GO:0006501)	1/76	0.337866	0.418617	0.381167	0.47623	-1	1	ULBP2
GO_Biological_Process_2018_	A	epidermis development (GO:0008544)	1/82	0.359114	0.430606	0.403946	0.487136	-1	1	LAMB3
GO_Biological_Process_2018_	A	nucleic acid-templated transcription (GO:0097659)	1/77	0.341455	0.42007	0.385022	0.47818	-1	1	PAX8
GO_Biological_Process_2018_	A	positive regulation of epithelial cell migration (GO:0010634)	1/75	0.334258	0.417622	0.377288	0.474799	-1	1	VEGFA
GO_Biological_Process_2018_	A	cellular response to decreased oxygen levels (GO:0036294)	1/65	0.297083	0.389385	0.337147	0.443011	-1	1	VEGFA
GO_Biological_Process_2018_	A	chloride transport (GO:0006821)	1/74	0.33063	0.41458	0.373384	0.471025	-1	1	SLC1A3
GO_Biological_Process_2018_	A	positive regulation of cell cycle (GO:0045787)	1/83	0.362589	0.430807	0.407661	0.487136	-1	1	EIF4EBP1
GO_Biological_Process_2018_	A	regulation of inflammatory response (GO:0050727)	2/167	0.227916	0.332034	0.281775	0.400559	-1	1	FNDC4;CCL3
GO_Biological_Process_2018_	A	negative regulation of inflammatory response (GO:0050728)	1/79	0.348576	0.425312	0.392662	0.483062	-1	1	FNDC4
GO_Biological_Process_2018_	A	antigen processing and presentation of exogenous peptide antigen via MHC class I, TAP-dependent (GO:0002479)	1/76	0.337866	0.418617	0.381167	0.47623	-1	1	PSMD3
GO_Biological_Process_2018_	A	response to calcium ion (GO:0051592)	1/80	0.352108	0.42712	0.396446	0.484148	-1	1	PPIF
GO_Biological_Process_2018_	A	regulation of cytokinesis (GO:0032465)	1/78	0.345025	0.42296	0.388854	0.480647	-1	1	ANKRD53
GO_Biological_Process_2018_	A	regulation of endothelial cell migration (GO:0010594)	1/70	0.315921	0.405905	0.357527	0.462213	-1	1	VEGFA
GO_Biological_Process_2018_	A	positive regulation of peptidyl-serine phosphorylation (GO:0033138)	1/84	0.366046	0.433924	0.411353	0.489863	-1	1	VEGFA
GO_Biological_Process_2018_	A	purine ribonucleotide biosynthetic process (GO:0009152)	1/76	0.337866	0.418617	0.381167	0.47623	-1	1	ADCY2
GO_Biological_Process_2018_	A	regulation of ubiquitin-protein ligase activity involved in mitotic cell cycle (GO:0051439)	1/73	0.326982	0.412488	0.369457	0.468338	-1	1	PSMD3
GO_Biological_Process_2018_	A	cellular response to tumor necrosis factor (GO:0071356)	2/195	0.283865	0.382919	0.345658	0.451349	-1	1	PSMD3;CCL3
GO_Biological_Process_2018_	A	antigen processing and presentation of exogenous peptide antigen via MHC class I (GO:0042590)	1/79	0.348576	0.425312	0.392662	0.483062	-1	1	PSMD3
GO_Biological_Process_2018_	A	negative regulation of cysteine-type endopeptidase activity involved in apoptotic process (GO:0043154)	1/69	0.312194	0.402606	0.353502	0.458716	-1	1	VEGFA
GO_Biological_Process_2018_	A	regulation of protein targeting to mitochondrion (GO:1903214)	1/89	0.383051	0.445965	0.429475	0.502259	-1	1	ITGAX
GO_Biological_Process_2018_	A	divalent metal ion transport (GO:0070838)	1/89	0.383051	0.445965	0.429475	0.502259	-1	1	CCL3
GO_Biological_Process_2018_	A	positive regulation of protein secretion (GO:0050714)	1/83	0.362589	0.430807	0.407661	0.487136	-1	1	IGF1
GO_Biological_Process_2018_	A	negative regulation of cell communication (GO:0010648)	1/79	0.348576	0.425312	0.392662	0.483062	-1	1	MUSK
GO_Biological_Process_2018_	A	calcium ion homeostasis (GO:0055074)	1/88	0.379686	0.445032	0.425895	0.502017	-1	1	CCL3
GO_Biological_Process_2018_	A	positive regulation of protein ubiquitination involved in ubiquitin-dependent protein catabolic process (GO:2000060)	1/88	0.379686	0.445032	0.425895	0.502017	-1	1	PSMD3
GO_Biological_Process_2018_	A	negative regulation of extrinsic apoptotic signaling pathway (GO:2001237)	1/77	0.341455	0.42007	0.385022	0.47818	-1	1	IGF1
GO_Biological_Process_2018_	A	regulation of hematopoietic stem cell differentiation (GO:1902036)	1/77	0.341455	0.42007	0.385022	0.47818	-1	1	PSMD3
GO_Biological_Process_2018_	A	positive regulation of protein complex assembly (GO:0031334)	1/89	0.383051	0.445965	0.429475	0.502259	-1	1	VEGFA
GO_Biological_Process_2018_	A	positive regulation of stress-activated MAPK cascade (GO:0032874)	1/81	0.35562	0.428389	0.400208	0.484903	-1	1	VEGFA
GO_Biological_Process_2018_	A	regulation of establishment of planar polarity (GO:0090175)	1/90	0.386397	0.448858	0.433033	0.50472	-1	1	PSMD3
GO_Biological_Process_2018_	A	regulation of phosphatidylinositol 3-kinase signaling (GO:0014066)	1/81	0.35562	0.428389	0.400208	0.484903	-1	1	IGF1
GO_Biological_Process_2018_	A	negative regulation of defense response (GO:0031348)	1/81	0.35562	0.428389	0.400208	0.484903	-1	1	FNDC4
GO_Biological_Process_2018_	A	positive regulation of response to external stimulus (GO:0032103)	1/91	0.389726	0.450715	0.436568	0.506575	-1	1	CCL3
GO_Biological_Process_2018_	A	C-terminal protein amino acid modification (GO:0018410)	1/83	0.362589	0.430807	0.407661	0.487136	-1	1	ULBP2
GO_Biological_Process_2018_	A	negative regulation of cell cycle (GO:0045786)	1/73	0.326982	0.412488	0.369457	0.468338	-1	1	PTPN3
GO_Biological_Process_2018_	A	regulation of stem cell differentiation (GO:2000736)	1/89	0.383051	0.445965	0.429475	0.502259	-1	1	PSMD3
GO_Biological_Process_2018_	A	negative regulation of cysteine-type endopeptidase activity (GO:2000117)	1/73	0.326982	0.412488	0.369457	0.468338	-1	1	VEGFA
GO_Biological_Process_2018_	A	regulation of peptidyl-serine phosphorylation (GO:0033135)	1/87	0.376304	0.443323	0.422293	0.500034	-1	1	VEGFA
GO_Biological_Process_2018_	A	regulation of cell cycle process (GO:0010564)	1/91	0.389726	0.450715	0.436568	0.506575	-1	1	ATF5
GO_Biological_Process_2018_	A	cellular macromolecule biosynthetic process (GO:0034645)	3/368	0.319795	0.408366	0.404974	0.487136	-1	1	PAX8;IGF1;EIF4G2
GO_Biological_Process_2018_	A	regulation of cell death (GO:0010941)	1/97	0.409324	0.46512	0.457329	0.521946	-1	1	JUNB
GO_Biological_Process_2018_	A	Wnt signaling pathway, planar cell polarity pathway (GO:0060071)	1/89	0.383051	0.445965	0.429475	0.502259	-1	1	PSMD3
GO_Biological_Process_2018_	A	regulation of neuron differentiation (GO:0045664)	1/85	0.369483	0.43651	0.415022	0.492544	-1	1	NRCAM
GO_Biological_Process_2018_	A	regulation of mitotic nuclear division (GO:0007088)	1/85	0.369483	0.43651	0.415022	0.492544	-1	1	IGF1
GO_Biological_Process_2018_	A	negative regulation of MAPK cascade (GO:0043409)	1/81	0.35562	0.428389	0.400208	0.484903	-1	1	DUSP4
GO_Biological_Process_2018_	A	cellular response to acid chemical (GO:0071229)	1/92	0.393036	0.453035	0.440082	0.508388	-1	1	VEGFA
GO_Biological_Process_2018_	A	DNA damage response, signal transduction by p53 class mediator (GO:0030330)	1/83	0.362589	0.430807	0.407661	0.487136	-1	1	USP10
GO_Biological_Process_2018_	A	negative regulation of kinase activity (GO:0033673)	1/92	0.393036	0.453035	0.440082	0.508388	-1	1	CISH
GO_Biological_Process_2018_	A	negative regulation of translation (GO:0017148)	1/89	0.383051	0.445965	0.429475	0.502259	-1	1	EIF4EBP1
GO_Biological_Process_2018_	A	cellular response to fibroblast growth factor stimulus (GO:0044344)	1/95	0.402861	0.461806	0.450494	0.517547	-1	1	FGFRL1
GO_Biological_Process_2018_	A	cAMP-mediated signaling (GO:0019933)	1/76	0.337866	0.418617	0.381167	0.47623	-1	1	ADCY2
GO_Biological_Process_2018_	A	positive regulation of supramolecular fiber organization (GO:1902905)	1/85	0.369483	0.43651	0.415022	0.492544	-1	1	ANKRD53
GO_Biological_Process_2018_	A	cation transport (GO:0006812)	1/80	0.352108	0.42712	0.396446	0.484148	-1	1	SLC36A2
GO_Biological_Process_2018_	A	regulation of cell growth (GO:0001558)	2/202	0.297847	0.389406	0.361387	0.463932	-1	1	CISH;EIF4G2
GO_Biological_Process_2018_	A	negative regulation of signaling (GO:0023057)	1/84	0.366046	0.433924	0.411353	0.489863	-1	1	MUSK
GO_Biological_Process_2018_	A	regulation of MAP kinase activity (GO:0043405)	1/88	0.379686	0.445032	0.425895	0.502017	-1	1	VEGFA
GO_Biological_Process_2018_	A	positive regulation of protein localization to membrane (GO:1905477)	1/96	0.406101	0.463989	0.453922	0.520338	-1	1	KCNB1
GO_Biological_Process_2018_	A	protein oligomerization (GO:0051259)	2/218	0.329631	0.41458	0.396797	0.484148	-1	1	NACC1;FGFRL1
GO_Biological_Process_2018_	A	positive regulation of signal transduction (GO:0009967)	2/207	0.307811	0.399753	0.372539	0.471025	-1	1	IGF1;VEGFA
GO_Biological_Process_2018_	A	regulation of autophagy (GO:0010506)	2/204	0.301835	0.39265	0.365856	0.466042	-1	1	USP10;EIF4G2
GO_Biological_Process_2018_	A	epithelial cell differentiation (GO:0030855)	1/97	0.409324	0.46512	0.457329	0.521946	-1	1	VEGFA
GO_Biological_Process_2018_	A	positive regulation of transcription from RNA polymerase II promoter (GO:0045944)	6/849	0.309769	0.400967	0.437946	0.507608	-1	1	PAX8;IGF1;LPIN1;ATF5;JUNB;VEGFA
GO_Biological_Process_2018_	A	plasma membrane bounded cell projection assembly (GO:0120031)	2/242	0.376527	0.443323	0.448174	0.51602	-1	1	ALPK3;PARVA
GO_Biological_Process_2018_	A	monovalent inorganic cation transport (GO:0015672)	1/105	0.434488	0.487338	0.483838	0.545626	-1	1	SLC36A2
GO_Biological_Process_2018_	A	axon development (GO:0061564)	1/95	0.402861	0.461806	0.450494	0.517547	-1	1	NRCAM
GO_Biological_Process_2018_	A	protein tetramerization (GO:0051262)	1/91	0.389726	0.450715	0.436568	0.506575	-1	1	ACACA
GO_Biological_Process_2018_	A	negative regulation of cellular protein metabolic process (GO:0032269)	1/90	0.386397	0.448858	0.433033	0.50472	-1	1	TM4SF20
GO_Biological_Process_2018_	A	apoptotic process (GO:0006915)	2/232	0.357128	0.429708	0.427046	0.502259	-1	1	PPIF;HK2
GO_Biological_Process_2018_	A	regulation of translation (GO:0006417)	2/214	0.321715	0.409847	0.388022	0.480647	-1	1	EIF5;EIF4G2
GO_Biological_Process_2018_	A	regulation of cysteine-type endopeptidase activity involved in apoptotic process (GO:0043281)	1/94	0.399604	0.459082	0.447045	0.515289	-1	1	VEGFA
GO_Biological_Process_2018_	A	regulation of kinase activity (GO:0043549)	1/102	0.425178	0.477924	0.47405	0.535749	-1	1	MUSK
GO_Biological_Process_2018_	A	organelle assembly (GO:0070925)	3/377	0.333109	0.417187	0.419966	0.497844	-1	1	HAUS7;ALPK3;PARVA
GO_Biological_Process_2018_	A	cell cycle G1/S phase transition (GO:0044843)	1/93	0.396329	0.455822	0.443574	0.511854	-1	1	EIF4EBP1
GO_Biological_Process_2018_	A	positive regulation of establishment of protein localization to mitochondrion (GO:1903749)	1/111	0.452661	0.501247	0.502875	0.558036	-1	1	ITGAX
GO_Biological_Process_2018_	A	mitotic cell cycle phase transition (GO:0044772)	2/222	0.337522	0.418617	0.405515	0.487136	-1	1	HAUS7;EIF4EBP1
GO_Biological_Process_2018_	A	ciliary basal body-plasma membrane docking (GO:0097711)	1/97	0.409324	0.46512	0.457329	0.521946	-1	1	HAUS7
GO_Biological_Process_2018_	A	response to tumor necrosis factor (GO:0034612)	1/98	0.412529	0.467234	0.460715	0.524088	-1	1	CCL3
GO_Biological_Process_2018_	A	cellular metal ion homeostasis (GO:0006875)	1/97	0.409324	0.46512	0.457329	0.521946	-1	1	CCL3
GO_Biological_Process_2018_	A	regulation of Ras protein signal transduction (GO:0046578)	1/91	0.389726	0.450715	0.436568	0.506575	-1	1	IGF1
GO_Biological_Process_2018_	A	calcium ion transport (GO:0006816)	1/119	0.475995	0.519903	0.527182	0.578845	-1	1	CCL3
GO_Biological_Process_2018_	A	phosphatidylinositol metabolic process (GO:0046488)	1/113	0.45859	0.506734	0.509065	0.564304	-1	1	IP6K3
GO_Biological_Process_2018_	A	regulation of signal transduction (GO:0009966)	2/234	0.361025	0.430807	0.431305	0.503834	-1	1	MUSK;FOXL1
GO_Biological_Process_2018_	A	histone modification (GO:0016570)	1/99	0.415717	0.4683	0.46408	0.526193	-1	1	NAA50
GO_Biological_Process_2018_	A	negative regulation of binding (GO:0051100)	1/83	0.362589	0.430807	0.407661	0.487136	-1	1	PLN
GO_Biological_Process_2018_	A	positive regulation of cell cycle process (GO:0090068)	1/108	0.443648	0.494419	0.493445	0.551684	-1	1	IGF1
GO_Biological_Process_2018_	A	positive regulation of ERK1 and ERK2 cascade (GO:0070374)	2/202	0.297847	0.389406	0.361387	0.463932	0	1	MUSK;CCL3
GO_Biological_Process_2018_	A	cellular response to lipopolysaccharide (GO:0071222)	1/92	0.393036	0.453035	0.440082	0.508388	-1	1	CCL3
GO_Biological_Process_2018_	A	G1/S transition of mitotic cell cycle (GO:0000082)	1/106	0.437558	0.490253	0.48706	0.548666	-1	1	EIF4EBP1
GO_Biological_Process_2018_	A	regulation of Wnt signaling pathway (GO:0030111)	1/110	0.449673	0.499059	0.499751	0.555753	-1	1	FOXL1
GO_Biological_Process_2018_	A	cellular response to starvation (GO:0009267)	1/108	0.443648	0.494419	0.493445	0.551684	-1	1	FADS1
GO_Biological_Process_2018_	A	regulation of insulin secretion (GO:0050796)	1/99	0.415717	0.4683	0.46408	0.526193	-1	1	KCNB1
GO_Biological_Process_2018_	A	small GTPase mediated signal transduction (GO:0007264)	1/100	0.418888	0.471362	0.467424	0.529408	-1	1	IGF1
GO_Biological_Process_2018_	A	positive regulation of kinase activity (GO:0033674)	1/114	0.46153	0.508366	0.512132	0.565897	-1	1	MUSK
GO_Biological_Process_2018_	A	cell morphogenesis involved in neuron differentiation (GO:0048667)	1/98	0.412529	0.467234	0.460715	0.524088	-1	1	NRCAM
GO_Biological_Process_2018_	A	protein localization to cell periphery (GO:1990778)	1/118	0.473133	0.517862	0.524209	0.576796	-1	1	KCNB1
GO_Biological_Process_2018_	A	positive regulation of developmental process (GO:0051094)	1/114	0.46153	0.508366	0.512132	0.565897	-1	1	JUNB
GO_Biological_Process_2018_	A	positive regulation of cellular catabolic process (GO:0031331)	1/107	0.440611	0.492615	0.490262	0.549896	-1	1	IGF1
GO_Biological_Process_2018_	A	axonogenesis (GO:0007409)	2/224	0.341458	0.42007	0.409852	0.489193	0	1	TUBB3;NRCAM
GO_Biological_Process_2018_	A	regulation of heart contraction (GO:0008016)	1/96	0.406101	0.463989	0.453922	0.520338	-1	0	PLN
GO_Biological_Process_2018_	A	tumor necrosis factor-mediated signaling pathway (GO:0033209)	1/124	0.490076	0.531383	0.541773	0.59051	-1	0	PSMD3
GO_Biological_Process_2018_	A	positive regulation of cellular component organization (GO:0051130)	1/107	0.440611	0.492615	0.490262	0.549896	-1	0	VEGFA
GO_Biological_Process_2018_	A	regulation of cell motility (GO:2000145)	1/110	0.449673	0.499059	0.499751	0.555753	-1	0	SRCIN1
GO_Biological_Process_2018_	A	protein modification by small protein removal (GO:0070646)	2/262	0.414582	0.4683	0.489104	0.549781	-1	0	USP10;PSMD3
GO_Biological_Process_2018_	A	regulation of cytokine production (GO:0001817)	1/109	0.446669	0.497253	0.496608	0.554031	-1	0	PRG2
GO_Biological_Process_2018_	A	protein deubiquitination (GO:0016579)	2/258	0.407058	0.464572	0.481066	0.543089	-1	0	USP10;PSMD3
GO_Biological_Process_2018_	A	response to molecule of bacterial origin (GO:0002237)	1/99	0.415717	0.4683	0.46408	0.526193	-1	0	JUNB
GO_Biological_Process_2018_	A	regulation of protein phosphorylation (GO:0001932)	2/262	0.414582	0.4683	0.489104	0.549781	-1	0	MUSK;VEGFA
GO_Biological_Process_2018_	A	enzyme linked receptor protein signaling pathway (GO:0007167)	1/121	0.481673	0.524455	0.533073	0.582856	-1	0	MUSK
GO_Biological_Process_2018_	A	cellular response to peptide hormone stimulus (GO:0071375)	1/111	0.452661	0.501247	0.502875	0.558036	-1	0	ADCY2
GO_Biological_Process_2018_	A	negative regulation of response to external stimulus (GO:0032102)	1/108	0.443648	0.494419	0.493445	0.551684	-1	0	FNDC4
GO_Biological_Process_2018_	A	protein O-linked glycosylation (GO:0006493)	1/116	0.467363	0.513705	0.518208	0.572005	-1	0	SPON1
GO_Biological_Process_2018_	A	regulation of immune response (GO:0050776)	2/252	0.395688	0.455588	0.468869	0.530468	0	0	CD300LB;ULBP3
GO_Biological_Process_2018_	A	positive regulation of neuron projection development (GO:0010976)	1/98	0.412529	0.467234	0.460715	0.524088	0	0	TENM3
GO_Biological_Process_2018_	A	cytoskeleton organization (GO:0007010)	1/127	0.498343	0.538263	0.550313	0.596641	-1	0	CCL3
GO_Biological_Process_2018_	A	cellular response to growth factor stimulus (GO:0071363)	1/140	0.532662	0.567519	0.585537	0.625338	-1	0	VEGFA
GO_Biological_Process_2018_	A	protein localization to plasma membrane (GO:0072659)	1/131	0.509161	0.545829	0.561455	0.604376	-1	0	KCNB1
GO_Biological_Process_2018_	A	protein lipidation (GO:0006497)	1/128	0.50107	0.538263	0.553124	0.596641	-1	0	ULBP2
GO_Biological_Process_2018_	A	regulation of cell proliferation (GO:0042127)	5/741	0.371399	0.438276	0.494486	0.552255	0	0	NACC1;IGF1;ATF5;JUNB;VEGFA
GO_Biological_Process_2018_	A	modification-dependent protein catabolic process (GO:0019941)	1/142	0.537731	0.570006	0.590708	0.627439	-1	0	PSMD3
GO_Biological_Process_2018_	A	regulation of mRNA stability (GO:0043488)	1/129	0.503781	0.540618	0.555918	0.599035	-1	0	PSMD3
GO_Biological_Process_2018_	A	regulation of neuron projection development (GO:0010975)	1/120	0.478842	0.522464	0.530136	0.581476	-1	0	TENM3
GO_Biological_Process_2018_	A	activation of MAPK activity (GO:0000187)	1/118	0.473133	0.517862	0.524209	0.576796	-1	0	IGF1
GO_Biological_Process_2018_	A	sulfur compound biosynthetic process (GO:0044272)	1/123	0.48729	0.529464	0.538891	0.587983	-1	0	GGCT
GO_Biological_Process_2018_	A	G2/M transition of mitotic cell cycle (GO:0000086)	1/127	0.498343	0.538263	0.550313	0.596641	-1	0	HAUS7
GO_Biological_Process_2018_	A	innate immune response activating cell surface receptor signaling pathway (GO:0002220)	1/125	0.492847	0.533832	0.544637	0.591775	-1	0	PSMD3
GO_Biological_Process_2018_	A	positive regulation of transferase activity (GO:0051347)	1/138	0.527538	0.563211	0.580301	0.621453	-1	0	MUSK
GO_Biological_Process_2018_	A	positive regulation of canonical Wnt signaling pathway (GO:0090263)	1/114	0.46153	0.508366	0.512132	0.565897	0	0	PSMD3
GO_Biological_Process_2018_	A	ion transport (GO:0006811)	2/290	0.465861	0.512594	0.543168	0.590839	0	0	SLC36A2;SLC1A3
GO_Biological_Process_2018_	A	negative regulation of response to stimulus (GO:0048585)	1/128	0.50107	0.538263	0.553124	0.596641	-1	0	MUSK
GO_Biological_Process_2018_	A	stimulatory C-type lectin receptor signaling pathway (GO:0002223)	1/122	0.484489	0.526971	0.535991	0.585432	-1	0	PSMD3
GO_Biological_Process_2018_	A	DNA replication (GO:0006260)	1/121	0.481673	0.524455	0.533073	0.582856	-1	0	IGF1
GO_Biological_Process_2018_	A	cell cycle G2/M phase transition (GO:0044839)	1/128	0.50107	0.538263	0.553124	0.596641	-1	0	HAUS7
GO_Biological_Process_2018_	A	negative regulation of signal transduction (GO:0009968)	2/284	0.455088	0.503399	0.531915	0.582813	0	0	CISH;MUSK
GO_Biological_Process_2018_	A	positive regulation of macromolecule biosynthetic process (GO:0010557)	1/143	0.540245	0.572089	0.593269	0.629518	-1	0	IGF1
GO_Biological_Process_2018_	A	positive regulation of cell proliferation (GO:0008284)	3/425	0.403669	0.462224	0.497537	0.554475	0	0	NACC1;IGF1;VEGFA
GO_Biological_Process_2018_	A	negative regulation of canonical Wnt signaling pathway (GO:0090090)	1/149	0.555048	0.585384	0.60831	0.643511	-1	0	PSMD3
GO_Biological_Process_2018_	A	positive regulation of cytosolic calcium ion concentration (GO:0007204)	1/134	0.517122	0.553225	0.569632	0.611914	-1	0	C1QTNF1
GO_Biological_Process_2018_	A	response to lipid (GO:0033993)	1/141	0.535203	0.567904	0.58813	0.625338	-1	0	JUNB
GO_Biological_Process_2018_	A	positive regulation of protein kinase B signaling (GO:0051897)	1/128	0.50107	0.538263	0.553124	0.596641	0	0	CCL3
GO_Biological_Process_2018_	A	protein localization to membrane (GO:0072657)	1/161	0.583251	0.610802	0.636759	0.668854	-1	0	KCNB1
GO_Biological_Process_2018_	A	positive regulation of protein serine/threonine kinase activity (GO:0071902)	1/119	0.475995	0.519903	0.527182	0.578845	0	0	VEGFA
GO_Biological_Process_2018_	A	positive regulation of Wnt signaling pathway (GO:0030177)	1/141	0.535203	0.567904	0.58813	0.625338	-1	0	PSMD3
GO_Biological_Process_2018_	A	regulation of protein kinase activity (GO:0045859)	1/148	0.552614	0.583408	0.605842	0.641552	-1	0	CISH
GO_Biological_Process_2018_	A	neuron development (GO:0048666)	1/145	0.545233	0.576784	0.598345	0.634258	-1	0	TENM3
GO_Biological_Process_2018_	A	non-canonical Wnt signaling pathway (GO:0035567)	1/128	0.50107	0.538263	0.553124	0.596641	0	0	PSMD3
GO_Biological_Process_2018_	A	protein phosphorylation (GO:0006468)	3/471	0.469277	0.515266	0.566856	0.60956	0	0	MUSK;ALPK3;IP6K3
GO_Biological_Process_2018_	A	mitochondrial transport (GO:0006839)	1/136	0.522358	0.558253	0.575	0.617044	0	0	PPIF
GO_Biological_Process_2018_	A	regulation of cellular component organization (GO:0051128)	1/141	0.535203	0.567904	0.58813	0.625338	0	0	CISH
GO_Biological_Process_2018_	A	male gamete generation (GO:0048232)	1/155	0.569378	0.598077	0.6228	0.656175	-1	0	ALPK3
GO_Biological_Process_2018_	A	cellular response to interferon-gamma (GO:0071346)	1/117	0.470256	0.515797	0.521218	0.574718	0	0	CCL3
GO_Biological_Process_2018_	A	positive regulation of cellular biosynthetic process (GO:0031328)	1/160	0.58097	0.609025	0.634469	0.667121	-1	0	IGF1
GO_Biological_Process_2018_	A	T cell receptor signaling pathway (GO:0050852)	1/164	0.590021	0.616033	0.643546	0.673945	-1	0	PSMD3
GO_Biological_Process_2018_	A	spermatogenesis (GO:0007283)	1/154	0.567022	0.596805	0.620422	0.654332	-1	0	ALPK3
GO_Biological_Process_2018_	A	negative regulation of gene expression (GO:0010629)	4/619	0.43042	0.483294	0.543209	0.590839	0	0	NACC1;CCL3;ATF5;VEGFA
GO_Biological_Process_2018_	A	glycerophospholipid biosynthetic process (GO:0046474)	1/165	0.592253	0.617745	0.645781	0.675606	-1	0	LPIN1
GO_Biological_Process_2018_	A	protein stabilization (GO:0050821)	1/153	0.564653	0.594912	0.61803	0.652469	0	0	IGF1
GO_Biological_Process_2018_	A	cellular protein metabolic process (GO:0044267)	3/485	0.488636	0.530374	0.586792	0.625338	0	0	TF;IGF1;F5
GO_Biological_Process_2018_	A	negative regulation of protein phosphorylation (GO:0001933)	1/179	0.622268	0.645177	0.675645	0.704022	-1	0	CISH
GO_Biological_Process_2018_	A	negative regulation of Wnt signaling pathway (GO:0030178)	1/175	0.613923	0.638431	0.667376	0.6968	-1	0	PSMD3
GO_Biological_Process_2018_	A	response to cytokine (GO:0034097)	1/139	0.530107	0.565375	0.582927	0.623624	0	0	JUNB
GO_Biological_Process_2018_	A	Fc-epsilon receptor signaling pathway (GO:0038095)	1/183	0.630434	0.652346	0.683711	0.710296	-1	0	PSMD3
GO_Biological_Process_2018_	A	inorganic cation transmembrane transport (GO:0098662)	1/141	0.535203	0.567904	0.58813	0.625338	0	0	SLC39A14
GO_Biological_Process_2018_	A	Fc receptor signaling pathway (GO:0038093)	1/184	0.632448	0.653781	0.685696	0.711649	-1	0	PSMD3
GO_Biological_Process_2018_	A	response to lipopolysaccharide (GO:0032496)	1/156	0.571722	0.599933	0.625163	0.657999	0	0	JUNB
GO_Biological_Process_2018_	A	regulation of GTPase activity (GO:0043087)	1/189	0.642357	0.662709	0.695439	0.720325	-1	0	CCL3
GO_Biological_Process_2018_	A	positive regulation of GTPase activity (GO:0043547)	1/193	0.650092	0.669364	0.703018	0.72601	-1	0	CCL3
GO_Biological_Process_2018_	A	neuron projection morphogenesis (GO:0048812)	1/164	0.590021	0.616033	0.643546	0.673945	0	0	NRCAM
GO_Biological_Process_2018_	A	regulation of protein kinase B signaling (GO:0051896)	1/164	0.590021	0.616033	0.643546	0.673945	0	0	CCL3
GO_Biological_Process_2018_	A	cellular response to lipid (GO:0071396)	1/179	0.622268	0.645177	0.675645	0.704022	0	0	ADCY2
GO_Biological_Process_2018_	A	positive regulation of hydrolase activity (GO:0051345)	1/173	0.609682	0.634654	0.663164	0.693096	0	0	CCL3
GO_Biological_Process_2018_	A	positive regulation of sequence-specific DNA binding transcription factor activity (GO:0051091)	1/216	0.691462	0.708459	0.743111	0.762128	-1	0	VEGFA
GO_Biological_Process_2018_	A	regulation of I-kappaB kinase/NF-kappaB signaling (GO:0043122)	1/205	0.672319	0.690884	0.724652	0.746134	0	0	USP10
GO_Biological_Process_2018_	A	Ras protein signal transduction (GO:0007265)	1/224	0.704684	0.720589	0.755762	0.77434	0	0	IGF1
GO_Biological_Process_2018_	A	regulation of canonical Wnt signaling pathway (GO:0060828)	1/214	0.688066	0.706369	0.739849	0.760278	0	0	PSMD3
GO_Biological_Process_2018_	A	negative regulation of transcription, DNA-templated (GO:0045892)	5/814	0.449727	0.499059	0.578608	0.620277	0	0	NACC1;ATF5;JUNB;HAMP;VEGFA
GO_Biological_Process_2018_	A	negative regulation of transcription from RNA polymerase II promoter (GO:0000122)	3/566	0.593282	0.6182	0.690392	0.715809	0	0	JUNB;HAMP;VEGFA
GO_Biological_Process_2018_	A	regulation of cell cycle (GO:0051726)	1/216	0.691462	0.708459	0.743111	0.762128	0	0	JUNB
GO_Biological_Process_2018_	A	ER to Golgi vesicle-mediated transport (GO:0006888)	1/181	0.626373	0.648788	0.679703	0.706837	0	0	F5
GO_Biological_Process_2018_	A	regulation of programmed cell death (GO:0043067)	1/269	0.769248	0.781244	0.816254	0.829792	-1	0	PAX8
GO_Biological_Process_2018_	A	anterograde trans-synaptic signaling (GO:0098916)	1/241	0.730945	0.74598	0.780635	0.796691	0	0	SLC1A3
GO_Biological_Process_2018_	A	proteasomal protein catabolic process (GO:0010498)	1/238	0.726485	0.742155	0.776435	0.793182	0	0	PSMD3
GO_Biological_Process_2018_	A	positive regulation of nucleic acid-templated transcription (GO:1903508)	3/503	0.513024	0.549405	0.61157	0.646304	0	0	PAX8;IGF1;ATF5
GO_Biological_Process_2018_	A	antigen receptor-mediated signaling pathway (GO:0050851)	1/258	0.754891	0.768161	0.803	0.817116	0	0	PSMD3
GO_Biological_Process_2018_	A	defense response to bacterium (GO:0042742)	1/242	0.732416	0.746749	0.782017	0.797321	0	0	HAMP
GO_Biological_Process_2018_	A	regulation of transcription from RNA polymerase II promoter (GO:0006357)	8/1479	0.550851	0.582137	0.714824	0.736742	0	0	PAX8;FOXL1;IGF1;LPIN1;ATF5;JUNB;HAMP;VEGFA
GO_Biological_Process_2018_	A	negative regulation of nucleic acid-templated transcription (GO:1903507)	2/445	0.696457	0.712877	0.769509	0.786877	0	0	NACC1;ATF5
GO_Biological_Process_2018_	A	protein transport (GO:0015031)	1/327	0.832239	0.838678	0.872844	0.879597	-1	0	TF
GO_Biological_Process_2018_	A	inflammatory response (GO:0006954)	1/253	0.748076	0.76197	0.796667	0.811464	0	0	CCL3
GO_Biological_Process_2018_	A	chemical synaptic transmission (GO:0007268)	1/290	0.794381	0.803636	0.839156	0.848933	0	0	SLC1A3
GO_Biological_Process_2018_	A	DNA repair (GO:0006281)	1/289	0.793248	0.80327	0.838132	0.848721	0	0	ASCC2
GO_Biological_Process_2018_	A	protein complex assembly (GO:0006461)	1/190	0.644306	0.664063	0.697351	0.721589	0	0	F5
GO_Biological_Process_2018_	A	cellular response to DNA damage stimulus (GO:0006974)	1/330	0.834987	0.840634	0.875248	0.881167	0	0	USP10
GO_Biological_Process_2018_	A	regulation of cellular macromolecule biosynthetic process (GO:2000112)	3/632	0.667802	0.68692	0.759661	0.777571	0	0	ASCC2;ATF5;FADS1
GO_Biological_Process_2018_	A	DNA metabolic process (GO:0006259)	1/315	0.820787	0.827938	0.862764	0.870281	0	0	IGF1
GO_Biological_Process_2018_	A	positive regulation of apoptotic process (GO:0043065)	1/308	0.813752	0.821637	0.856523	0.864822	0	0	CCL3
GO_Biological_Process_2018_	A	regulation of transcription, DNA-templated (GO:0006355)	9/1599	0.499139	0.538263	0.677073	0.704805	0	0	PAX8;NACC1;ASCC2;FOXL1;IGF1;ATF5;JUNB;FADS1;VEGFA
GO_Biological_Process_2018_	A	negative regulation of cellular macromolecule biosynthetic process (GO:2000113)	2/513	0.768602	0.781244	0.833718	0.845072	0	0	NACC1;ATF5
GO_Biological_Process_2018_	A	proteasome-mediated ubiquitin-dependent protein catabolic process (GO:0043161)	1/292	0.796628	0.805128	0.841184	0.850159	0	0	PSMD3
GO_Biological_Process_2018_	A	protein polyubiquitination (GO:0000209)	1/284	0.787491	0.798215	0.832917	0.845072	0	0	PSMD3
GO_Biological_Process_2018_	A	ubiquitin-dependent protein catabolic process (GO:0006511)	1/342	0.845539	0.850436	0.88442	0.889542	0	0	PSMD3
GO_Biological_Process_2018_	A	regulation of nucleic acid-templated transcription (GO:1903506)	3/608	0.641889	0.662709	0.736021	0.757092	0	0	ASCC2;ATF5;FADS1
GO_Biological_Process_2018_	A	positive regulation of transcription, DNA-templated (GO:0045893)	6/1121	0.568154	0.597393	0.708339	0.730781	0	0	PAX8;IGF1;LPIN1;ATF5;JUNB;VEGFA
GO_Biological_Process_2018_	A	transmembrane transport (GO:0055085)	1/379	0.874046	0.87657	0.908707	0.911331	0	0	PSMD3
GO_Biological_Process_2018_	A	Golgi vesicle transport (GO:0048193)	1/272	0.773016	0.784307	0.819713	0.832496	0	0	F5
GO_Biological_Process_2018_	A	negative regulation of cell proliferation (GO:0008285)	1/364	0.863179	0.866505	0.899538	0.903005	0	0	ATF5
GO_Biological_Process_2018_	A	gene expression (GO:0010467)	1/412	0.895036	0.896757	0.926067	0.927847	0	0	PAX8
GO_Biological_Process_2018_	A	transcription, DNA-templated (GO:0006351)	1/357	0.857795	0.861931	0.894953	0.899268	0	0	PAX8
GO_Biological_Process_2018_	A	phosphorylation (GO:0016310)	2/387	0.621263	0.645177	0.69895	0.722525	0	0	ALPK3;IP6K3
GO_Biological_Process_2018_	A	protein ubiquitination (GO:0016567)	1/507	0.938001	0.938902	0.959826	0.960748	0	0	PSMD3
GO_Biological_Process_2018_	A	negative regulation of cellular process (GO:0048523)	1/535	0.946939	0.946939	0.966462	0.966462	0	0	ATF5
GO_Biological_Process_2018_	B	triglyceride biosynthetic process (GO:0019432)	4/20	1.46474e-06	0.00104143	5.20206e-06	0.00369867	-2	28	DGAT2;MOGAT1;PNPLA3;PCK1
GO_Biological_Process_2018_	B	succinyl-CoA metabolic process (GO:0006104)	2/7	0.000378454	0.0298979	0.000831888	0.0657192	-4	28	SUCLG2;ACOT4
GO_Biological_Process_2018_	B	citrate metabolic process (GO:0006101)	2/7	0.000378454	0.0298979	0.000831888	0.0657192	-3	25	GHR;ACO1
GO_Biological_Process_2018_	B	tricarboxylic acid metabolic process (GO:0072350)	3/14	2.70017e-05	0.00959911	7.27687e-05	0.0258144	-2	22	GHR;IDH3G;ACO1
GO_Biological_Process_2018_	B	acylglycerol biosynthetic process (GO:0046463)	3/20	8.30021e-05	0.0116701	0.000185567	0.0258144	-2	21	DGAT2;MOGAT1;PNPLA3
GO_Biological_Process_2018_	B	cellular triglyceride homeostasis (GO:0035356)	2/7	0.000378454	0.0298979	0.000831888	0.0657192	-3	21	DGAT2;FITM2
GO_Biological_Process_2018_	B	lipid particle organization (GO:0034389)	2/15	0.0018504	0.0822273	0.00306411	0.145239	-3	18	PNPLA3;FITM2
GO_Biological_Process_2018_	B	lipid homeostasis (GO:0055088)	4/50	6.31067e-05	0.0116701	0.000138597	0.0258144	-2	18	CEBPA;DGAT2;ORMDL3;PNPLA3
GO_Biological_Process_2018_	B	cytochrome complex assembly (GO:0017004)	2/11	0.000980155	0.0580742	0.00177973	0.105449	-2	17	SCO1;COX10
GO_Biological_Process_2018_	B	negative regulation of axon regeneration (GO:0048681)	1/8	0.0338926	0.247853	0.0432156	0.304092	-4	15	RTN4RL1
GO_Biological_Process_2018_	B	acylglycerol acyl-chain remodeling (GO:0036155)	2/9	0.000645156	0.0458706	0.00126291	0.089793	-2	14	DGAT2;PNPLA3
GO_Biological_Process_2018_	B	triglyceride metabolic process (GO:0006641)	4/53	7.94563e-05	0.0116701	0.00017121	0.0258144	-1	14	DGAT2;FABP5;MOGAT1;PNPLA3
GO_Biological_Process_2018_	B	positive regulation of fatty acid beta-oxidation (GO:0032000)	1/8	0.0338926	0.247853	0.0432156	0.304092	-4	13	ABCD2
GO_Biological_Process_2018_	B	fatty acid metabolic process (GO:0006631)	5/107	9.84823e-05	0.0116701	0.000217843	0.0258144	-1	12	GGT5;GHR;ABCD2;PNPLA3;ACOT4
GO_Biological_Process_2018_	B	liver development (GO:0001889)	2/32	0.00833667	0.219532	0.0119801	0.304092	-2	12	CEBPA;PCK1
GO_Biological_Process_2018_	B	negative regulation of neuron projection regeneration (GO:0070571)	1/9	0.0380485	0.247853	0.0479022	0.304092	-4	11	RTN4RL1
GO_Biological_Process_2018_	B	dicarboxylic acid metabolic process (GO:0043648)	3/60	0.00220111	0.0920583	0.00361775	0.151307	-2	11	GHR;SHMT1;ACOT4
GO_Biological_Process_2018_	B	short-chain fatty acid catabolic process (GO:0019626)	1/9	0.0380485	0.247853	0.0479022	0.304092	-3	11	PCK1
GO_Biological_Process_2018_	B	oxaloacetate metabolic process (GO:0006107)	1/8	0.0338926	0.247853	0.0432156	0.304092	-3	11	GHR
GO_Biological_Process_2018_	B	monocarboxylic acid metabolic process (GO:0032787)	4/109	0.00125761	0.0687815	0.00227201	0.118419	-2	11	GGT5;GHR;PCK1;ACOT4
GO_Biological_Process_2018_	B	synaptic transmission, glycinergic (GO:0060012)	1/7	0.0297189	0.247853	0.0385063	0.304092	-3	11	GLRB
GO_Biological_Process_2018_	B	apoptotic cell clearance (GO:0043277)	2/27	0.00598212	0.193331	0.0088075	0.284642	-2	11	FCN2;TYRO3
GO_Biological_Process_2018_	B	hormone transport (GO:0009914)	1/7	0.0297189	0.247853	0.0385063	0.304092	-3	11	FFAR4
GO_Biological_Process_2018_	B	mitochondrial DNA metabolic process (GO:0032042)	1/8	0.0338926	0.247853	0.0432156	0.304092	-3	11	PARP1
GO_Biological_Process_2018_	B	tRNA 3'-end processing (GO:0042780)	1/8	0.0338926	0.247853	0.0432156	0.304092	-3	11	HSD17B10
GO_Biological_Process_2018_	B	positive regulation of ERK1 and ERK2 cascade (GO:0070374)	5/202	0.00179659	0.0822273	0.00342529	0.151307	-2	11	ALK;NDRG4;CCL4;TYRO3;FFAR4
GO_Biological_Process_2018_	B	COPI-coated vesicle budding (GO:0035964)	1/7	0.0297189	0.247853	0.0385063	0.304092	-3	11	ARFGAP2
GO_Biological_Process_2018_	B	positive regulation of sequestering of triglyceride (GO:0010890)	1/8	0.0338926	0.247853	0.0432156	0.304092	-3	11	FITM2
GO_Biological_Process_2018_	B	transmembrane receptor protein tyrosine phosphatase signaling pathway (GO:0007185)	1/7	0.0297189	0.247853	0.0385063	0.304092	-3	10	PTPRF
GO_Biological_Process_2018_	B	axon regeneration (GO:0031103)	1/8	0.0338926	0.247853	0.0432156	0.304092	-3	10	RTN4RL1
GO_Biological_Process_2018_	B	COPI coating of Golgi vesicle (GO:0048205)	1/7	0.0297189	0.247853	0.0385063	0.304092	-3	10	ARFGAP2
GO_Biological_Process_2018_	B	purine nucleobase biosynthetic process (GO:0009113)	1/7	0.0297189	0.247853	0.0385063	0.304092	-3	10	SHMT1
GO_Biological_Process_2018_	B	fatty acid beta-oxidation (GO:0006635)	3/51	0.00137729	0.0699464	0.00233173	0.118419	-2	10	HADHB;GCDH;ABCD2
GO_Biological_Process_2018_	B	semaphorin-plexin signaling pathway involved in axon guidance (GO:1902287)	1/10	0.0421867	0.247853	0.0525661	0.304092	-3	10	PLXNA4
GO_Biological_Process_2018_	B	organic hydroxy compound catabolic process (GO:1901616)	1/7	0.0297189	0.247853	0.0385063	0.304092	-3	10	ADH4
GO_Biological_Process_2018_	B	regulation of response to oxidative stress (GO:1902882)	1/9	0.0380485	0.247853	0.0479022	0.304092	-3	10	STOX1
GO_Biological_Process_2018_	B	Golgi transport vesicle coating (GO:0048200)	1/7	0.0297189	0.247853	0.0385063	0.304092	-3	10	ARFGAP2
GO_Biological_Process_2018_	B	branched-chain amino acid metabolic process (GO:0009081)	2/23	0.00436019	0.155005	0.00659052	0.246624	-2	9	GHR;HSD17B10
GO_Biological_Process_2018_	B	acylglycerol catabolic process (GO:0046464)	2/31	0.00783738	0.219532	0.0113109	0.304092	-2	9	FABP5;PNPLA3
GO_Biological_Process_2018_	B	triglyceride catabolic process (GO:0019433)	2/23	0.00436019	0.155005	0.00659052	0.246624	-2	9	FABP5;PNPLA3
GO_Biological_Process_2018_	B	very long-chain fatty acid metabolic process (GO:0000038)	2/30	0.00735215	0.217807	0.0106588	0.304092	-2	9	ABCD2;ACOT4
GO_Biological_Process_2018_	B	leukotriene D4 biosynthetic process (GO:1901750)	1/11	0.0463074	0.247853	0.0572075	0.304092	-3	9	GGT5
GO_Biological_Process_2018_	B	positive regulation of multicellular organism growth (GO:0040018)	1/8	0.0338926	0.247853	0.0432156	0.304092	-3	9	GHR
GO_Biological_Process_2018_	B	respiratory chain complex IV assembly (GO:0008535)	2/26	0.00555444	0.188057	0.00822594	0.278507	-2	9	SCO1;COX10
GO_Biological_Process_2018_	B	positive regulation of fatty acid oxidation (GO:0046321)	1/12	0.0504105	0.247853	0.0618265	0.304092	-3	9	ABCD2
GO_Biological_Process_2018_	B	acyl-CoA metabolic process (GO:0006637)	2/40	0.0128223	0.247853	0.0179309	0.304092	-2	9	SUCLG2;ACOT4
GO_Biological_Process_2018_	B	valine metabolic process (GO:0006573)	1/8	0.0338926	0.247853	0.0432156	0.304092	-3	9	GHR
GO_Biological_Process_2018_	B	gluconeogenesis (GO:0006094)	2/42	0.0140757	0.247853	0.019578	0.304092	-2	9	PCK1;PGM1
GO_Biological_Process_2018_	B	peroxisome fission (GO:0016559)	1/10	0.0421867	0.247853	0.0525661	0.304092	-3	9	PEX11A
GO_Biological_Process_2018_	B	L-ascorbic acid metabolic process (GO:0019852)	1/10	0.0421867	0.247853	0.0525661	0.304092	-3	9	CYB5A
GO_Biological_Process_2018_	B	sulfur compound catabolic process (GO:0044273)	2/36	0.010472	0.247853	0.0148252	0.304092	-2	9	GGT5;CSPG5
GO_Biological_Process_2018_	B	carnitine metabolic process (GO:0009437)	1/12	0.0504105	0.247853	0.0618265	0.304092	-3	9	SHMT1
GO_Biological_Process_2018_	B	regulation of axon regeneration (GO:0048679)	1/11	0.0463074	0.247853	0.0572075	0.304092	-3	9	RTN4RL1
GO_Biological_Process_2018_	B	cardiolipin acyl-chain remodeling (GO:0035965)	1/7	0.0297189	0.247853	0.0385063	0.304092	-2	9	HADHB
GO_Biological_Process_2018_	B	triglyceride homeostasis (GO:0070328)	2/29	0.00688111	0.212716	0.0100241	0.304092	-2	8	DGAT2;FITM2
GO_Biological_Process_2018_	B	cellular response to growth hormone stimulus (GO:0071378)	1/11	0.0463074	0.247853	0.0572075	0.304092	-3	8	GHR
GO_Biological_Process_2018_	B	mitochondrion organization (GO:0007005)	5/168	0.000792854	0.0512472	0.00157173	0.101591	-1	8	ACSS2;PARP1;AIFM2;CHCHD10;HSD17B10
GO_Biological_Process_2018_	B	regulation of ATP biosynthetic process (GO:2001169)	1/9	0.0380485	0.247853	0.0479022	0.304092	-3	8	PARP1
GO_Biological_Process_2018_	B	regulation of natural killer cell chemotaxis (GO:2000501)	1/8	0.0338926	0.247853	0.0432156	0.304092	-2	8	CCL4
GO_Biological_Process_2018_	B	ATP synthesis coupled electron transport (GO:0042773)	1/10	0.0421867	0.247853	0.0525661	0.304092	-3	8	NDUFV3
GO_Biological_Process_2018_	B	glycine metabolic process (GO:0006544)	1/11	0.0463074	0.247853	0.0572075	0.304092	-3	8	SHMT1
GO_Biological_Process_2018_	B	chemical homeostasis (GO:0048878)	2/39	0.012215	0.247853	0.0171306	0.304092	-2	8	CEBPA;PNPLA3
GO_Biological_Process_2018_	B	insulin-like growth factor receptor signaling pathway (GO:0048009)	1/11	0.0463074	0.247853	0.0572075	0.304092	-3	8	GHR
GO_Biological_Process_2018_	B	galactose metabolic process (GO:0006012)	1/11	0.0463074	0.247853	0.0572075	0.304092	-3	8	PGM1
GO_Biological_Process_2018_	B	ATP metabolic process (GO:0046034)	2/57	0.0250326	0.247853	0.0337903	0.304092	-2	8	PARP1;CHCHD10
GO_Biological_Process_2018_	B	response to axon injury (GO:0048678)	1/12	0.0504105	0.247853	0.0618265	0.304092	-3	8	RTN4RL1
GO_Biological_Process_2018_	B	serine family amino acid catabolic process (GO:0009071)	1/10	0.0421867	0.247853	0.0525661	0.304092	-3	8	SHMT1
GO_Biological_Process_2018_	B	mitochondrial RNA processing (GO:0000963)	1/7	0.0297189	0.247853	0.0385063	0.304092	-2	8	HSD17B10
GO_Biological_Process_2018_	B	photoreceptor cell development (GO:0042461)	1/12	0.0504105	0.247853	0.0618265	0.304092	-3	8	RORB
GO_Biological_Process_2018_	B	hexose metabolic process (GO:0019318)	2/46	0.016734	0.247853	0.0230544	0.304092	-2	8	PCK1;PGM1
GO_Biological_Process_2018_	B	granulocyte differentiation (GO:0030851)	1/9	0.0380485	0.247853	0.0479022	0.304092	-2	8	CEBPA
GO_Biological_Process_2018_	B	internal protein amino acid acetylation (GO:0006475)	1/12	0.0504105	0.247853	0.0618265	0.304092	-3	8	PCK1
GO_Biological_Process_2018_	B	neuron projection regeneration (GO:0031102)	1/11	0.0463074	0.247853	0.0572075	0.304092	-3	8	RTN4RL1
GO_Biological_Process_2018_	B	complement activation, lectin pathway (GO:0001867)	1/11	0.0463074	0.247853	0.0572075	0.304092	-3	8	FCN2
GO_Biological_Process_2018_	B	adipose tissue development (GO:0060612)	1/10	0.0421867	0.247853	0.0525661	0.304092	-2	8	DGAT2
GO_Biological_Process_2018_	B	motor neuron axon guidance (GO:0008045)	1/11	0.0463074	0.247853	0.0572075	0.304092	-3	8	PLXNA4
GO_Biological_Process_2018_	B	carboxylic acid metabolic process (GO:0019752)	2/34	0.00937696	0.238108	0.0133694	0.304092	-2	8	CYB5A;ACOT4
GO_Biological_Process_2018_	B	regulation of fatty acid beta-oxidation (GO:0031998)	1/11	0.0463074	0.247853	0.0572075	0.304092	-2	8	ABCD2
GO_Biological_Process_2018_	B	N-acetylglucosamine metabolic process (GO:0006044)	1/15	0.0626155	0.25586	0.07555	0.311012	-3	8	MGAT3
GO_Biological_Process_2018_	B	creatine metabolic process (GO:0006600)	1/11	0.0463074	0.247853	0.0572075	0.304092	-2	8	GHR
GO_Biological_Process_2018_	B	regulation of receptor binding (GO:1900120)	1/9	0.0380485	0.247853	0.0479022	0.304092	-2	8	PTPRF
GO_Biological_Process_2018_	B	lagging strand elongation (GO:0006273)	1/9	0.0380485	0.247853	0.0479022	0.304092	-2	8	PARP1
GO_Biological_Process_2018_	B	positive regulation of transcription from RNA polymerase III promoter (GO:0045945)	1/11	0.0463074	0.247853	0.0572075	0.304092	-2	7	CEBPA
GO_Biological_Process_2018_	B	eye photoreceptor cell development (GO:0042462)	1/13	0.0544962	0.247853	0.0664231	0.304092	-3	7	RORB
GO_Biological_Process_2018_	B	cellular modified amino acid catabolic process (GO:0042219)	1/13	0.0544962	0.247853	0.0664231	0.304092	-3	7	GGT5
GO_Biological_Process_2018_	B	positive regulation of ruffle assembly (GO:1900029)	1/13	0.0544962	0.247853	0.0664231	0.304092	-3	7	FAM98A
GO_Biological_Process_2018_	B	acylglycerol metabolic process (GO:0006639)	2/37	0.0110397	0.247853	0.0155776	0.304092	-2	7	DGAT2;PNPLA3
GO_Biological_Process_2018_	B	quinone metabolic process (GO:1901661)	1/11	0.0463074	0.247853	0.0572075	0.304092	-2	7	ADH4
GO_Biological_Process_2018_	B	carbohydrate derivative transport (GO:1901264)	1/13	0.0544962	0.247853	0.0664231	0.304092	-2	7	SLC29A2
GO_Biological_Process_2018_	B	glucosamine-containing compound metabolic process (GO:1901071)	1/14	0.0585645	0.247853	0.0709976	0.304092	-3	7	MGAT3
GO_Biological_Process_2018_	B	alanine transport (GO:0032328)	1/10	0.0421867	0.247853	0.0525661	0.304092	-2	7	SLC7A10
GO_Biological_Process_2018_	B	semaphorin-plexin signaling pathway involved in neuron projection guidance (GO:1902285)	1/14	0.0585645	0.247853	0.0709976	0.304092	-3	7	PLXNA4
GO_Biological_Process_2018_	B	tetrahydrofolate metabolic process (GO:0046653)	1/14	0.0585645	0.247853	0.0709976	0.304092	-3	7	SHMT1
GO_Biological_Process_2018_	B	fatty acid homeostasis (GO:0055089)	1/10	0.0421867	0.247853	0.0525661	0.304092	-2	7	DGAT2
GO_Biological_Process_2018_	B	regulation of ceramide biosynthetic process (GO:2000303)	1/12	0.0504105	0.247853	0.0618265	0.304092	-2	7	ORMDL3
GO_Biological_Process_2018_	B	positive regulation of cell cycle G2/M phase transition (GO:1902751)	1/18	0.0746655	0.257673	0.0890755	0.311012	-3	7	STOX1
GO_Biological_Process_2018_	B	hexose biosynthetic process (GO:0019319)	2/45	0.0160508	0.247853	0.0221629	0.304092	-2	7	PCK1;PGM1
GO_Biological_Process_2018_	B	alcohol catabolic process (GO:0046164)	1/12	0.0504105	0.247853	0.0618265	0.304092	-2	7	ADH4
GO_Biological_Process_2018_	B	dicarboxylic acid catabolic process (GO:0043649)	1/14	0.0585645	0.247853	0.0709976	0.304092	-2	7	ACOT4
GO_Biological_Process_2018_	B	DNA ligation involved in DNA repair (GO:0051103)	1/13	0.0544962	0.247853	0.0664231	0.304092	-2	7	PARP1
GO_Biological_Process_2018_	B	positive regulation of G2/M transition of mitotic cell cycle (GO:0010971)	1/17	0.0706659	0.257673	0.0845888	0.311012	-3	7	STOX1
GO_Biological_Process_2018_	B	fatty acid oxidation (GO:0019395)	2/51	0.0203315	0.247853	0.0277276	0.304092	-2	7	HADHB;ABCD2
GO_Biological_Process_2018_	B	regulation of sequestering of triglyceride (GO:0010889)	1/13	0.0544962	0.247853	0.0664231	0.304092	-2	7	FITM2
GO_Biological_Process_2018_	B	negative regulation of ATP metabolic process (GO:1903579)	1/13	0.0544962	0.247853	0.0664231	0.304092	-2	7	PARP1
GO_Biological_Process_2018_	B	retinol metabolic process (GO:0042572)	1/13	0.0544962	0.247853	0.0664231	0.304092	-2	7	ADH4
GO_Biological_Process_2018_	B	macrophage differentiation (GO:0030225)	1/12	0.0504105	0.247853	0.0618265	0.304092	-2	7	PARP1
GO_Biological_Process_2018_	B	succinate metabolic process (GO:0006105)	1/9	0.0380485	0.247853	0.0479022	0.304092	-2	7	GHR
GO_Biological_Process_2018_	B	lysine catabolic process (GO:0006554)	1/13	0.0544962	0.247853	0.0664231	0.304092	-2	7	GCDH
GO_Biological_Process_2018_	B	leukotriene D4 metabolic process (GO:1901748)	1/11	0.0463074	0.247853	0.0572075	0.304092	-2	7	GGT5
GO_Biological_Process_2018_	B	galactose catabolic process (GO:0019388)	1/9	0.0380485	0.247853	0.0479022	0.304092	-2	7	PGM1
GO_Biological_Process_2018_	B	lysine metabolic process (GO:0006553)	1/13	0.0544962	0.247853	0.0664231	0.304092	-2	7	GCDH
GO_Biological_Process_2018_	B	eye photoreceptor cell differentiation (GO:0001754)	1/13	0.0544962	0.247853	0.0664231	0.304092	-2	7	RORB
GO_Biological_Process_2018_	B	regulation of response to stress (GO:0080134)	1/11	0.0463074	0.247853	0.0572075	0.304092	-2	7	STOX1
GO_Biological_Process_2018_	B	mitochondrial genome maintenance (GO:0000002)	1/14	0.0585645	0.247853	0.0709976	0.304092	-2	7	PARP1
GO_Biological_Process_2018_	B	glycerolipid metabolic process (GO:0046486)	1/11	0.0463074	0.247853	0.0572075	0.304092	-2	7	PNPLA3
GO_Biological_Process_2018_	B	chondroitin sulfate catabolic process (GO:0030207)	1/14	0.0585645	0.247853	0.0709976	0.304092	-2	7	CSPG5
GO_Biological_Process_2018_	B	purine nucleobase metabolic process (GO:0006144)	1/12	0.0504105	0.247853	0.0618265	0.304092	-2	7	SHMT1
GO_Biological_Process_2018_	B	response to iron ion (GO:0010039)	1/14	0.0585645	0.247853	0.0709976	0.304092	-2	7	ACO1
GO_Biological_Process_2018_	B	nitric oxide biosynthetic process (GO:0006809)	1/12	0.0504105	0.247853	0.0618265	0.304092	-2	7	GCHFR
GO_Biological_Process_2018_	B	short-chain fatty acid metabolic process (GO:0046459)	1/10	0.0421867	0.247853	0.0525661	0.304092	-2	6	ACOT4
GO_Biological_Process_2018_	B	negative regulation by host of viral transcription (GO:0043922)	1/13	0.0544962	0.247853	0.0664231	0.304092	-2	6	CCL4
GO_Biological_Process_2018_	B	regulation of triglyceride biosynthetic process (GO:0010866)	1/14	0.0585645	0.247853	0.0709976	0.304092	-2	6	FITM2
GO_Biological_Process_2018_	B	regulation of axon guidance (GO:1902667)	1/14	0.0585645	0.247853	0.0709976	0.304092	-2	6	PLXNA4
GO_Biological_Process_2018_	B	anterior/posterior axis specification (GO:0009948)	1/19	0.078648	0.257673	0.0935405	0.311012	-2	6	WLS
GO_Biological_Process_2018_	B	tetrahydrofolate interconversion (GO:0035999)	1/8	0.0338926	0.247853	0.0432156	0.304092	-2	6	SHMT1
GO_Biological_Process_2018_	B	pentose-phosphate shunt (GO:0006098)	1/13	0.0544962	0.247853	0.0664231	0.304092	-2	6	PGD
GO_Biological_Process_2018_	B	response to insulin (GO:0032868)	2/72	0.0384708	0.247853	0.0509147	0.304092	-2	6	PARP1;PCK1
GO_Biological_Process_2018_	B	DNA strand elongation involved in DNA replication (GO:0006271)	1/17	0.0706659	0.257673	0.0845888	0.311012	-2	6	PARP1
GO_Biological_Process_2018_	B	diacylglycerol metabolic process (GO:0046339)	1/14	0.0585645	0.247853	0.0709976	0.304092	-2	6	DGAT2
GO_Biological_Process_2018_	B	fatty acid beta-oxidation using acyl-CoA dehydrogenase (GO:0033539)	1/16	0.0666493	0.257673	0.0800803	0.311012	-2	6	GCDH
GO_Biological_Process_2018_	B	regulation of platelet-derived growth factor receptor signaling pathway (GO:0010640)	1/11	0.0463074	0.247853	0.0572075	0.304092	-2	6	NDRG4
GO_Biological_Process_2018_	B	fatty acid catabolic process (GO:0009062)	2/66	0.0328207	0.247853	0.043747	0.304092	-2	6	HADHB;ABCD2
GO_Biological_Process_2018_	B	dermatan sulfate biosynthetic process (GO:0030208)	1/13	0.0544962	0.247853	0.0664231	0.304092	-2	6	CSPG5
GO_Biological_Process_2018_	B	protein homotetramerization (GO:0051289)	2/58	0.0258553	0.247853	0.0348468	0.304092	-2	6	SHMT1;HSD17B10
GO_Biological_Process_2018_	B	purine ribonucleoside triphosphate biosynthetic process (GO:0009206)	1/28	0.113737	0.273911	0.132767	0.324486	-3	6	CHCHD10
GO_Biological_Process_2018_	B	pyruvate metabolic process (GO:0006090)	2/47	0.0174295	0.247853	0.0239604	0.304092	-1	6	PCK1;PGM1
GO_Biological_Process_2018_	B	dermatan sulfate metabolic process (GO:0030205)	1/14	0.0585645	0.247853	0.0709976	0.304092	-2	6	CSPG5
GO_Biological_Process_2018_	B	2-oxoglutarate metabolic process (GO:0006103)	1/18	0.0746655	0.257673	0.0890755	0.311012	-2	6	GHR
GO_Biological_Process_2018_	B	mitochondrial tRNA modification (GO:0070900)	1/9	0.0380485	0.247853	0.0479022	0.304092	-2	6	HSD17B10
GO_Biological_Process_2018_	B	nitric oxide metabolic process (GO:0046209)	1/13	0.0544962	0.247853	0.0664231	0.304092	-2	6	GCHFR
GO_Biological_Process_2018_	B	regulation of ERK1 and ERK2 cascade (GO:0070372)	5/248	0.00433895	0.155005	0.00793344	0.278507	-1	6	ALK;NDRG4;CCL4;TYRO3;FFAR4
GO_Biological_Process_2018_	B	positive regulation of lipid storage (GO:0010884)	1/20	0.0826136	0.257673	0.0979839	0.311012	-2	6	FITM2
GO_Biological_Process_2018_	B	dermatan sulfate proteoglycan biosynthetic process (GO:0050651)	1/16	0.0666493	0.257673	0.0800803	0.311012	-2	6	CSPG5
GO_Biological_Process_2018_	B	leukotriene biosynthetic process (GO:0019370)	1/19	0.078648	0.257673	0.0935405	0.311012	-2	6	GGT5
GO_Biological_Process_2018_	B	negative regulation of receptor binding (GO:1900121)	1/12	0.0504105	0.247853	0.0618265	0.304092	-2	6	PTPRF
GO_Biological_Process_2018_	B	regulation of glucose transport (GO:0010827)	1/17	0.0706659	0.257673	0.0845888	0.311012	-2	6	FFAR4
GO_Biological_Process_2018_	B	long-chain fatty acid metabolic process (GO:0001676)	2/56	0.0242209	0.247853	0.0327466	0.304092	-1	6	PNPLA3;ACOT4
GO_Biological_Process_2018_	B	positive regulation of lipid catabolic process (GO:0050996)	1/19	0.078648	0.257673	0.0935405	0.311012	-2	6	ABCD2
GO_Biological_Process_2018_	B	negative regulation of telomere maintenance (GO:0032205)	1/18	0.0746655	0.257673	0.0890755	0.311012	-2	5	PARP1
GO_Biological_Process_2018_	B	negative regulation of response to wounding (GO:1903035)	1/17	0.0706659	0.257673	0.0845888	0.311012	-2	5	RTN4RL1
GO_Biological_Process_2018_	B	mitochondrial electron transport, cytochrome c to oxygen (GO:0006123)	1/22	0.0904942	0.26155	0.106806	0.312508	-2	5	COX10
GO_Biological_Process_2018_	B	myeloid leukocyte differentiation (GO:0002573)	2/51	0.0203315	0.247853	0.0277276	0.304092	-1	5	CEBPA;PARP1
GO_Biological_Process_2018_	B	fatty-acyl-CoA metabolic process (GO:0035337)	1/20	0.0826136	0.257673	0.0979839	0.311012	-2	5	DGAT2
GO_Biological_Process_2018_	B	negative regulation of inflammatory response (GO:0050728)	2/79	0.0454923	0.247853	0.0597676	0.304092	-2	5	TYRO3;FFAR4
GO_Biological_Process_2018_	B	regulation of telomere maintenance via telomere lengthening (GO:1904356)	1/18	0.0746655	0.257673	0.0890755	0.311012	-2	5	PARP1
GO_Biological_Process_2018_	B	glucan biosynthetic process (GO:0009250)	1/19	0.078648	0.257673	0.0935405	0.311012	-2	5	PGM1
GO_Biological_Process_2018_	B	negative regulation of response to external stimulus (GO:0032102)	3/108	0.0113305	0.247853	0.0171098	0.304092	-1	5	RTN4RL1;TYRO3;FFAR4
GO_Biological_Process_2018_	B	ribosomal small subunit assembly (GO:0000028)	1/20	0.0826136	0.257673	0.0979839	0.311012	-2	5	MRPS11
GO_Biological_Process_2018_	B	regulation of ruffle assembly (GO:1900027)	1/22	0.0904942	0.26155	0.106806	0.312508	-2	5	FAM98A
GO_Biological_Process_2018_	B	positive regulation of lymphocyte migration (GO:2000403)	1/18	0.0746655	0.257673	0.0890755	0.311012	-2	5	CCL4
GO_Biological_Process_2018_	B	positive regulation of MAPK cascade (GO:0043410)	5/290	0.00829985	0.219532	0.0147008	0.304092	-1	5	ALK;NDRG4;CCL4;TYRO3;FFAR4
GO_Biological_Process_2018_	B	hexose catabolic process (GO:0019320)	1/10	0.0421867	0.247853	0.0525661	0.304092	-2	5	PGM1
GO_Biological_Process_2018_	B	heme biosynthetic process (GO:0006783)	1/17	0.0706659	0.257673	0.0845888	0.311012	-2	5	COX10
GO_Biological_Process_2018_	B	cardiolipin metabolic process (GO:0032048)	1/14	0.0585645	0.247853	0.0709976	0.304092	-2	5	HADHB
GO_Biological_Process_2018_	B	protein tetramerization (GO:0051262)	2/91	0.0585163	0.247853	0.0760517	0.311012	-2	5	SHMT1;HSD17B10
GO_Biological_Process_2018_	B	positive regulation of cardiac muscle hypertrophy (GO:0010613)	1/17	0.0706659	0.257673	0.0845888	0.311012	-2	5	PARP1
GO_Biological_Process_2018_	B	mitochondrial ATP synthesis coupled electron transport (GO:0042775)	2/86	0.0529455	0.247853	0.0691066	0.304092	-2	5	NDUFV3;COX10
GO_Biological_Process_2018_	B	cellular response to glucocorticoid stimulus (GO:0071385)	1/18	0.0746655	0.257673	0.0890755	0.311012	-2	5	PCK1
GO_Biological_Process_2018_	B	regulation of multicellular organism growth (GO:0040014)	1/18	0.0746655	0.257673	0.0890755	0.311012	-2	5	GHR
GO_Biological_Process_2018_	B	retrograde vesicle-mediated transport, Golgi to ER (GO:0006890)	2/81	0.0475791	0.247853	0.0623881	0.304092	-2	5	COPB2;ARFGAP2
GO_Biological_Process_2018_	B	anion homeostasis (GO:0055081)	1/19	0.078648	0.257673	0.0935405	0.311012	-2	5	DGAT2
GO_Biological_Process_2018_	B	ribose phosphate metabolic process (GO:0019693)	1/13	0.0544962	0.247853	0.0664231	0.304092	-2	5	PGD
GO_Biological_Process_2018_	B	regulation of smooth muscle cell migration (GO:0014910)	1/19	0.078648	0.257673	0.0935405	0.311012	-2	5	NDRG4
GO_Biological_Process_2018_	B	oxidative phosphorylation (GO:0006119)	1/12	0.0504105	0.247853	0.0618265	0.304092	-2	5	CHCHD10
GO_Biological_Process_2018_	B	negative regulation of defense response (GO:0031348)	2/81	0.0475791	0.247853	0.0623881	0.304092	-2	5	TYRO3;FFAR4
GO_Biological_Process_2018_	B	growth hormone receptor signaling pathway (GO:0060396)	1/21	0.0865623	0.259687	0.102406	0.312508	-2	5	GHR
GO_Biological_Process_2018_	B	NADP metabolic process (GO:0006739)	1/20	0.0826136	0.257673	0.0979839	0.311012	-2	5	PGD
GO_Biological_Process_2018_	B	negative regulation of protein localization to plasma membrane (GO:1903077)	1/20	0.0826136	0.257673	0.0979839	0.311012	-2	5	MRAP
GO_Biological_Process_2018_	B	L-serine metabolic process (GO:0006563)	1/12	0.0504105	0.247853	0.0618265	0.304092	-2	5	SHMT1
GO_Biological_Process_2018_	B	folic acid metabolic process (GO:0046655)	1/20	0.0826136	0.257673	0.0979839	0.311012	-2	5	SHMT1
GO_Biological_Process_2018_	B	hepaticobiliary system development (GO:0061008)	1/22	0.0904942	0.26155	0.106806	0.312508	-2	5	CEBPA
GO_Biological_Process_2018_	B	leukotriene metabolic process (GO:0006691)	1/20	0.0826136	0.257673	0.0979839	0.311012	-2	5	GGT5
GO_Biological_Process_2018_	B	cellular amide metabolic process (GO:0043603)	2/63	0.0301303	0.247853	0.0403183	0.304092	-1	5	GHR;ORMDL3
GO_Biological_Process_2018_	B	glyceraldehyde-3-phosphate metabolic process (GO:0019682)	1/19	0.078648	0.257673	0.0935405	0.311012	-2	5	PGD
GO_Biological_Process_2018_	B	ER to Golgi vesicle-mediated transport (GO:0006888)	3/181	0.0432144	0.247853	0.0613676	0.304092	-2	5	COPB2;TRAPPC1;ARFGAP2
GO_Biological_Process_2018_	B	aspartate family amino acid catabolic process (GO:0009068)	1/20	0.0826136	0.257673	0.0979839	0.311012	-2	5	GCDH
GO_Biological_Process_2018_	B	carbohydrate homeostasis (GO:0033500)	2/64	0.0310168	0.247853	0.0414493	0.304092	-1	5	CEBPA;PCK1
GO_Biological_Process_2018_	B	porphyrin-containing compound biosynthetic process (GO:0006779)	1/19	0.078648	0.257673	0.0935405	0.311012	-2	5	COX10
GO_Biological_Process_2018_	B	negative regulation of innate immune response (GO:0045824)	1/21	0.0865623	0.259687	0.102406	0.312508	-2	5	TYRO3
GO_Biological_Process_2018_	B	regulation of transport (GO:0051049)	1/21	0.0865623	0.259687	0.102406	0.312508	-2	5	FFAR4
GO_Biological_Process_2018_	B	fat cell differentiation (GO:0045444)	2/56	0.0242209	0.247853	0.0327466	0.304092	-1	5	CEBPA;EGR2
GO_Biological_Process_2018_	B	regulation of cellular protein localization (GO:1903827)	1/26	0.106055	0.267395	0.124197	0.317281	-2	5	PARP1
GO_Biological_Process_2018_	B	negative regulation of platelet-derived growth factor receptor signaling pathway (GO:0010642)	1/16	0.0666493	0.257673	0.0800803	0.311012	-2	5	NDRG4
GO_Biological_Process_2018_	B	negative regulation of protein localization to cell periphery (GO:1904376)	1/20	0.0826136	0.257673	0.0979839	0.311012	-2	5	MRAP
GO_Biological_Process_2018_	B	peptide catabolic process (GO:0043171)	1/26	0.106055	0.267395	0.124197	0.317281	-2	5	GGT5
GO_Biological_Process_2018_	B	DNA ligation (GO:0006266)	1/19	0.078648	0.257673	0.0935405	0.311012	-2	5	PARP1
GO_Biological_Process_2018_	B	cellular response to fatty acid (GO:0071398)	1/13	0.0544962	0.247853	0.0664231	0.304092	-2	5	DGAT2
GO_Biological_Process_2018_	B	mitochondrial respiratory chain complex IV assembly (GO:0033617)	1/21	0.0865623	0.259687	0.102406	0.312508	-2	5	SCO1
GO_Biological_Process_2018_	B	glucan catabolic process (GO:0009251)	1/19	0.078648	0.257673	0.0935405	0.311012	-2	5	PGM1
GO_Biological_Process_2018_	B	ATP biosynthetic process (GO:0006754)	1/33	0.132656	0.284093	0.153831	0.333457	-2	5	CHCHD10
GO_Biological_Process_2018_	B	primary alcohol metabolic process (GO:0034308)	1/20	0.0826136	0.257673	0.0979839	0.311012	-2	5	ADH4
GO_Biological_Process_2018_	B	protein ADP-ribosylation (GO:0006471)	1/20	0.0826136	0.257673	0.0979839	0.311012	-2	4	PARP1
GO_Biological_Process_2018_	B	peripheral nervous system development (GO:0007422)	1/23	0.0944094	0.263236	0.111186	0.314953	-2	4	EGR2
GO_Biological_Process_2018_	B	peptidyl-tyrosine dephosphorylation (GO:0035335)	1/26	0.106055	0.267395	0.124197	0.317281	-2	4	PTPRF
GO_Biological_Process_2018_	B	nucleotide-excision repair, preincision complex stabilization (GO:0006293)	1/22	0.0904942	0.26155	0.106806	0.312508	-2	4	PARP1
GO_Biological_Process_2018_	B	folic acid-containing compound metabolic process (GO:0006760)	1/24	0.0983079	0.264779	0.115544	0.317188	-2	4	SHMT1
GO_Biological_Process_2018_	B	regulation of primary metabolic process (GO:0080090)	3/140	0.0225303	0.247853	0.0329735	0.304092	-1	4	PSMB6;PEX11A;G0S2
GO_Biological_Process_2018_	B	regulation of axon extension involved in axon guidance (GO:0048841)	1/24	0.0983079	0.264779	0.115544	0.317188	-2	4	PLXNA4
GO_Biological_Process_2018_	B	glucose metabolic process (GO:0006006)	2/65	0.0319137	0.247853	0.0425922	0.304092	-1	4	PCK1;PGM1
GO_Biological_Process_2018_	B	regulation of cardiac muscle hypertrophy (GO:0010611)	1/22	0.0904942	0.26155	0.106806	0.312508	-2	4	PARP1
GO_Biological_Process_2018_	B	positive regulation of canonical Wnt signaling pathway (GO:0090263)	2/114	0.0864729	0.259687	0.110519	0.314953	-2	4	PSMB6;WLS
GO_Biological_Process_2018_	B	negative regulation of cellular amide metabolic process (GO:0034249)	2/76	0.0424283	0.247853	0.0559114	0.304092	-1	4	SHMT1;ORMDL3
GO_Biological_Process_2018_	B	water-soluble vitamin metabolic process (GO:0006767)	2/78	0.044462	0.247853	0.0584721	0.304092	-1	4	CYB5A;SHMT1
GO_Biological_Process_2018_	B	carboxylic acid catabolic process (GO:0046395)	1/29	0.117553	0.273911	0.137021	0.324486	-2	4	ACOT4
GO_Biological_Process_2018_	B	regulation of toll-like receptor signaling pathway (GO:0034121)	1/21	0.0865623	0.259687	0.102406	0.312508	-2	4	TYRO3
GO_Biological_Process_2018_	B	lipid biosynthetic process (GO:0008610)	2/73	0.0394462	0.247853	0.052148	0.304092	-1	4	ACSS2;FITM2
GO_Biological_Process_2018_	B	transcription, DNA-templated (GO:0006351)	4/357	0.0679951	0.257673	0.100549	0.312508	-2	4	CEBPA;EGR2;PARP1;GLIS1
GO_Biological_Process_2018_	B	negative regulation of viral transcription (GO:0032897)	1/24	0.0983079	0.264779	0.115544	0.317188	-2	4	CCL4
GO_Biological_Process_2018_	B	neutral amino acid transport (GO:0015804)	1/26	0.106055	0.267395	0.124197	0.317281	-2	4	SLC7A10
GO_Biological_Process_2018_	B	semaphorin-plexin signaling pathway (GO:0071526)	1/30	0.121353	0.273911	0.141254	0.324486	-2	4	PLXNA4
GO_Biological_Process_2018_	B	regulation of centrosome cycle (GO:0046605)	1/27	0.109904	0.272271	0.128492	0.321683	-2	4	FBXW5
GO_Biological_Process_2018_	B	mitochondrial respiratory chain complex assembly (GO:0033108)	2/98	0.0666378	0.257673	0.086128	0.311012	-2	4	SCO1;NDUFV3
GO_Biological_Process_2018_	B	ATP generation from ADP (GO:0006757)	1/25	0.10219	0.267395	0.119881	0.317281	-2	4	PGM1
GO_Biological_Process_2018_	B	JAK-STAT cascade involved in growth hormone signaling pathway (GO:0060397)	1/16	0.0666493	0.257673	0.0800803	0.311012	-2	4	GHR
GO_Biological_Process_2018_	B	cellular response to hexose stimulus (GO:0071331)	1/22	0.0904942	0.26155	0.106806	0.312508	-2	4	PCK1
GO_Biological_Process_2018_	B	negative regulation of cyclin-dependent protein serine/threonine kinase activity (GO:0045736)	1/25	0.10219	0.267395	0.119881	0.317281	-2	4	CEBPA
GO_Biological_Process_2018_	B	STAT cascade (GO:0097696)	1/23	0.0944094	0.263236	0.111186	0.314953	-2	4	GHR
GO_Biological_Process_2018_	B	calcium-independent cell-cell adhesion via plasma membrane cell-adhesion molecules (GO:0016338)	1/21	0.0865623	0.259687	0.102406	0.312508	-2	4	CLDN2
GO_Biological_Process_2018_	B	negative regulation of telomere maintenance via telomere lengthening (GO:1904357)	1/27	0.109904	0.272271	0.128492	0.321683	-2	4	PARP1
GO_Biological_Process_2018_	B	nucleotide-excision repair, DNA damage recognition (GO:0000715)	1/24	0.0983079	0.264779	0.115544	0.317188	-2	4	PARP1
GO_Biological_Process_2018_	B	embryonic heart tube development (GO:0035050)	1/17	0.0706659	0.257673	0.0845888	0.311012	-2	4	NDRG4
GO_Biological_Process_2018_	B	nucleotide-excision repair, DNA duplex unwinding (GO:0000717)	1/23	0.0944094	0.263236	0.111186	0.314953	-2	4	PARP1
GO_Biological_Process_2018_	B	amino acid transmembrane transport (GO:0003333)	1/30	0.121353	0.273911	0.141254	0.324486	-2	4	SLC7A10
GO_Biological_Process_2018_	B	positive regulation of transcription from RNA polymerase II promoter (GO:0045944)	7/849	0.0727461	0.257673	0.124561	0.317281	-2	4	CEBPA;EGR2;PARP1;MLX;RORB;KLF14;GLIS1
GO_Biological_Process_2018_	B	positive regulation of muscle hypertrophy (GO:0014742)	1/15	0.0626155	0.25586	0.07555	0.311012	-1	4	PARP1
GO_Biological_Process_2018_	B	regulation of transcription from RNA polymerase III promoter (GO:0006359)	1/23	0.0944094	0.263236	0.111186	0.314953	-2	4	CEBPA
GO_Biological_Process_2018_	B	SCF-dependent proteasomal ubiquitin-dependent protein catabolic process (GO:0031146)	2/73	0.0394462	0.247853	0.052148	0.304092	-1	4	PSMB6;FBXW5
GO_Biological_Process_2018_	B	mitochondrial respiratory chain complex IV biogenesis (GO:0097034)	1/22	0.0904942	0.26155	0.106806	0.312508	-2	4	SCO1
GO_Biological_Process_2018_	B	cellular polysaccharide catabolic process (GO:0044247)	1/20	0.0826136	0.257673	0.0979839	0.311012	-2	4	PGM1
GO_Biological_Process_2018_	B	phospholipid metabolic process (GO:0006644)	2/71	0.0375048	0.247853	0.0496922	0.304092	-1	4	PNPLA3;FITM2
GO_Biological_Process_2018_	B	purine-containing compound biosynthetic process (GO:0072522)	1/23	0.0944094	0.263236	0.111186	0.314953	-2	4	SHMT1
GO_Biological_Process_2018_	B	glucose 6-phosphate metabolic process (GO:0051156)	1/17	0.0706659	0.257673	0.0845888	0.311012	-2	4	PGD
GO_Biological_Process_2018_	B	negative regulation of smooth muscle cell migration (GO:0014912)	1/15	0.0626155	0.25586	0.07555	0.311012	-1	4	NDRG4
GO_Biological_Process_2018_	B	negative regulation of cyclin-dependent protein kinase activity (GO:1904030)	1/22	0.0904942	0.26155	0.106806	0.312508	-2	4	CEBPA
GO_Biological_Process_2018_	B	regulation of centrosome duplication (GO:0010824)	1/26	0.106055	0.267395	0.124197	0.317281	-2	4	FBXW5
GO_Biological_Process_2018_	B	peroxisome organization (GO:0007031)	1/24	0.0983079	0.264779	0.115544	0.317188	-2	4	PEX11A
GO_Biological_Process_2018_	B	nucleotide-excision repair, DNA incision, 3'-to lesion (GO:0006295)	1/23	0.0944094	0.263236	0.111186	0.314953	-2	4	PARP1
GO_Biological_Process_2018_	B	branched-chain amino acid catabolic process (GO:0009083)	1/22	0.0904942	0.26155	0.106806	0.312508	-2	4	HSD17B10
GO_Biological_Process_2018_	B	positive regulation of kinase activity (GO:0033674)	2/114	0.0864729	0.259687	0.110519	0.314953	-2	4	ALK;TYRO3
GO_Biological_Process_2018_	B	protein O-linked fucosylation (GO:0036066)	1/16	0.0666493	0.257673	0.0800803	0.311012	-1	4	SLC35C1
GO_Biological_Process_2018_	B	negative regulation of cell communication (GO:0010648)	2/79	0.0454923	0.247853	0.0597676	0.304092	-1	4	ALK;TYRO3
GO_Biological_Process_2018_	B	regulation of transcription from RNA polymerase II promoter in response to hypoxia (GO:0061418)	2/79	0.0454923	0.247853	0.0597676	0.304092	-1	4	PSMB6;STOX1
GO_Biological_Process_2018_	B	proteasomal ubiquitin-independent protein catabolic process (GO:0010499)	1/25	0.10219	0.267395	0.119881	0.317281	-2	4	PSMB6
GO_Biological_Process_2018_	B	negative regulation of protein localization to membrane (GO:1905476)	1/25	0.10219	0.267395	0.119881	0.317281	-2	4	MRAP
GO_Biological_Process_2018_	B	negative regulation of smooth muscle cell proliferation (GO:0048662)	1/28	0.113737	0.273911	0.132767	0.324486	-2	4	NDRG4
GO_Biological_Process_2018_	B	macromolecule modification (GO:0043412)	1/25	0.10219	0.267395	0.119881	0.317281	-2	4	PARP1
GO_Biological_Process_2018_	B	cellular response to peptide hormone stimulus (GO:0071375)	2/111	0.0826293	0.257673	0.105815	0.312508	-2	4	PARP1;PCK1
GO_Biological_Process_2018_	B	cellular nitrogen compound biosynthetic process (GO:0044271)	1/24	0.0983079	0.264779	0.115544	0.317188	-2	4	GCHFR
GO_Biological_Process_2018_	B	positive regulation of cyclin-dependent protein kinase activity (GO:1904031)	1/27	0.109904	0.272271	0.128492	0.321683	-2	4	STOX1
GO_Biological_Process_2018_	B	glucose homeostasis (GO:0042593)	2/75	0.0414251	0.247853	0.0546465	0.304092	-1	4	CEBPA;PCK1
GO_Biological_Process_2018_	B	negative regulation of signaling (GO:0023057)	2/84	0.0507738	0.247853	0.0663912	0.304092	-1	4	ALK;TYRO3
GO_Biological_Process_2018_	B	long-chain fatty-acyl-CoA metabolic process (GO:0035336)	1/26	0.106055	0.267395	0.124197	0.317281	-2	4	DGAT2
GO_Biological_Process_2018_	B	protein modification process (GO:0036211)	2/85	0.0518556	0.247853	0.0677443	0.304092	-1	4	PARP1;MMP15
GO_Biological_Process_2018_	B	regulation of cytokine secretion (GO:0050707)	1/32	0.128905	0.279425	0.149659	0.331018	-2	4	FFAR4
GO_Biological_Process_2018_	B	cellular response to glucose stimulus (GO:0071333)	1/28	0.113737	0.273911	0.132767	0.324486	-2	4	PCK1
GO_Biological_Process_2018_	B	respiratory tube development (GO:0030323)	1/26	0.106055	0.267395	0.124197	0.317281	-2	4	CEBPA
GO_Biological_Process_2018_	B	positive regulation of peptidyl-threonine phosphorylation (GO:0010800)	1/26	0.106055	0.267395	0.124197	0.317281	-2	4	STOX1
GO_Biological_Process_2018_	B	tRNA methylation (GO:0030488)	1/27	0.109904	0.272271	0.128492	0.321683	-2	4	HSD17B10
GO_Biological_Process_2018_	B	protein-DNA complex assembly (GO:0065004)	2/92	0.059654	0.249494	0.0774666	0.311012	-1	4	PARP1;NAP1L4
GO_Biological_Process_2018_	B	negative regulation of transferase activity (GO:0051348)	1/31	0.125137	0.274606	0.145467	0.326267	-2	4	CHCHD10
GO_Biological_Process_2018_	B	cellular response to hormone stimulus (GO:0032870)	2/81	0.0475791	0.247853	0.0623881	0.304092	-1	4	GHR;FFAR4
GO_Biological_Process_2018_	B	cellular response to acid chemical (GO:0071229)	2/92	0.059654	0.249494	0.0774666	0.311012	-1	4	SHMT1;RORB
GO_Biological_Process_2018_	B	lung development (GO:0030324)	1/30	0.121353	0.273911	0.141254	0.324486	-2	4	CEBPA
GO_Biological_Process_2018_	B	protein export from nucleus (GO:0006611)	1/29	0.117553	0.273911	0.137021	0.324486	-2	4	EGR2
GO_Biological_Process_2018_	B	protein alkylation (GO:0008213)	1/30	0.121353	0.273911	0.141254	0.324486	-2	4	FAM98A
GO_Biological_Process_2018_	B	glycolytic process (GO:0006096)	1/24	0.0983079	0.264779	0.115544	0.317188	-2	4	PGM1
GO_Biological_Process_2018_	B	purine ribonucleoside monophosphate biosynthetic process (GO:0009168)	1/40	0.158475	0.302503	0.182476	0.351775	-2	4	CHCHD10
GO_Biological_Process_2018_	B	organelle fission (GO:0048285)	1/29	0.117553	0.273911	0.137021	0.324486	-2	4	PEX11A
GO_Biological_Process_2018_	B	substrate adhesion-dependent cell spreading (GO:0034446)	1/33	0.132656	0.284093	0.153831	0.333457	-2	4	TYRO3
GO_Biological_Process_2018_	B	regulation of developmental growth (GO:0048638)	1/31	0.125137	0.274606	0.145467	0.326267	-2	4	GHR
GO_Biological_Process_2018_	B	nucleotide-excision repair, DNA incision, 5'-to lesion (GO:0006296)	1/38	0.151177	0.296107	0.174391	0.343467	-2	4	PARP1
GO_Biological_Process_2018_	B	glycogen biosynthetic process (GO:0005978)	1/19	0.078648	0.257673	0.0935405	0.311012	-1	4	PGM1
GO_Biological_Process_2018_	B	cellular amino acid catabolic process (GO:0009063)	1/24	0.0983079	0.264779	0.115544	0.317188	-2	4	HSD17B10
GO_Biological_Process_2018_	B	chondroitin sulfate proteoglycan biosynthetic process (GO:0050650)	1/26	0.106055	0.267395	0.124197	0.317281	-2	4	CSPG5
GO_Biological_Process_2018_	B	regulation of cellular biosynthetic process (GO:0031326)	1/30	0.121353	0.273911	0.141254	0.324486	-2	4	FITM2
GO_Biological_Process_2018_	B	respiratory system development (GO:0060541)	1/30	0.121353	0.273911	0.141254	0.324486	-2	4	CEBPA
[truncated: 7,877 more rows]

## Sheet: Cluster secretome
Source.Name		Cluster	Term	Overlap	P-value	Adjusted P-value	Old P-value	Old Adjusted P-value	Z-score	Combined Score	Genes	Term2
KEGG_2019_Human		C	Glycine, serine and threonine metabolism	1/40	0.0354093	0.10078	0.0562684	0.160148	-302	1008	AOC3	Glycine, serine and threonine metabolism
KEGG_2019_Human		I	Arachidonic acid metabolism	2/63	0.0070523	0.0455687	0.010618	0.0686085	-118	584	PLA2G2D;GGT1	Arachidonic acid metabolism
KEGG_2019_Human		H	Toll-like receptor signaling pathway	3/104	0.000105305	0.00166573	0.000380429	0.00774748	-54	491	CXCL9;CCL5;SPP1	Toll-like receptor signaling pathway
KEGG_2019_Human		H	Basal cell carcinoma	2/63	0.00144632	0.0151863	0.00357151	0.0375008	-68	443	WNT10B;WNT1	Basal cell carcinoma
KEGG_2019_Human		A	Ferroptosis	2/40	0.000878417	0.0264277	0.00322362	0.0983205	-57	400	TF;SLC39A14	Ferroptosis
KEGG_2019_Human		B	Arachidonic acid metabolism	1/63	0.0432221	0.100852	0.063735	0.148715	-120	376	GGT5	Arachidonic acid metabolism
KEGG_2019_Human		I	Toll-like receptor signaling pathway	3/104	0.00117343	0.016428	0.00205689	0.0287965	-52	348	CXCL10;CXCL11;CTSK	Toll-like receptor signaling pathway
KEGG_2019_Human		E	Retinol metabolism	1/67	0.0199349	0.080984	0.0343988	0.138975	-86	335	RDH12	Retinol metabolism
KEGG_2019_Human		I	Basal cell carcinoma	2/63	0.0070523	0.0455687	0.010618	0.0686085	-65	324	WNT6;WNT16	Basal cell carcinoma
KEGG_2019_Human		J	Complement and coagulation cascades	3/79	0.000354422	0.00553689	0.000372745	0.0058016	-40	319	C1S;F2RL3;C2	Complement and coagulation cascades
KEGG_2019_Human		B	Salmonella infection	1/86	0.0585645	0.109539	0.0857553	0.159589	-107	304	CCL4	Salmonella infection
KEGG_2019_Human		A	Asthma	1/31	0.0335681	0.153804	0.0635765	0.276218	-83	281	PRG2	Asthma
KEGG_2019_Human		I	Osteoclast differentiation	4/127	0.000118717	0.00498613	0.000239733	0.0100688	-31	281	IFNG;CTSK;ACP5;TREM2	Osteoclast differentiation
KEGG_2019_Human		I	Rheumatoid arthritis	3/91	0.000797	0.0133896	0.0014171	0.0238073	-37	263	IFNG;CTSK;ACP5	Rheumatoid arthritis
KEGG_2019_Human		I	TGF-beta signaling pathway	3/90	0.000771791	0.0133896	0.00137398	0.0238073	-36	257	IFNG;GDF6;DCN	TGF-beta signaling pathway
KEGG_2019_Human		A	Complement and coagulation cascades	2/79	0.00338089	0.0515586	0.0115802	0.176598	-39	224	ITGAX;F5	Complement and coagulation cascades
KEGG_2019_Human		A	Renal cell carcinoma	1/69	0.0732498	0.153804	0.13415	0.276218	-85	222	VEGFA	Renal cell carcinoma
KEGG_2019_Human		K	Alanine, aspartate and glutamate metabolism	1/35	0.0293487	0.155161	0.0363023	0.19036	-63	222	IL4I1	Alanine, aspartate and glutamate metabolism
KEGG_2019_Human		A	Salmonella infection	1/86	0.0904942	0.153804	0.164079	0.276218	-92	221	CCL3	Salmonella infection
KEGG_2019_Human		J	Staphylococcus aureus infection	2/68	0.006304	0.0294187	0.0067121	0.0313231	-42	212	C1S;C2	Staphylococcus aureus infection
KEGG_2019_Human		C	Retinol metabolism	1/67	0.0586375	0.120533	0.0917347	0.188566	-74	211	RETSAT	Retinol metabolism
KEGG_2019_Human		B	Fatty acid elongation	1/27	0.0187411	0.100852	0.0283364	0.148715	-52	205	HADHB	Fatty acid elongation
KEGG_2019_Human		C	Fatty acid biosynthesis	1/13	0.0116405	0.0615284	0.0195475	0.103322	-46	205	ACACB	Fatty acid biosynthesis
KEGG_2019_Human		I	Linoleic acid metabolism	1/29	0.0564433	0.148164	0.0704969	0.191024	-71	203	PLA2G2D	Linoleic acid metabolism
KEGG_2019_Human		K	Lysine degradation	1/59	0.0490029	0.16195	0.0598584	0.197578	-67	201	PLOD2	Lysine degradation
KEGG_2019_Human		A	Rheumatoid arthritis	2/91	0.00445791	0.0543865	0.0150735	0.183897	-37	200	CCL3;VEGFA	Rheumatoid arthritis
KEGG_2019_Human		E	Glycerolipid metabolism	1/61	0.0181633	0.080984	0.0313999	0.138975	-49	197	PNLIPRP3	Glycerolipid metabolism
KEGG_2019_Human		K	Basal cell carcinoma	1/63	0.0522419	0.16195	0.063735	0.197578	-66	195	WNT3	Basal cell carcinoma
KEGG_2019_Human		A	Long-term depression	1/60	0.0639945	0.153804	0.117901	0.276218	-70	191	IGF1	Long-term depression
KEGG_2019_Human		A	Dilated cardiomyopathy (DCM)	1/91	0.0955075	0.153804	0.172696	0.276218	-80	189	IGF1	Dilated cardiomyopathy (DCM)
KEGG_2019_Human		C	Basal cell carcinoma	1/63	0.0552299	0.120206	0.0865581	0.188391	-64	186	WNT9B	Basal cell carcinoma
KEGG_2019_Human		F	Amino sugar and nucleotide sugar metabolism	1/48	0.0284306	0.144073	0.0491252	0.243844	-52	184	CHIT1	Amino sugar and nucleotide sugar metabolism
KEGG_2019_Human		K	Cysteine and methionine metabolism	1/47	0.0392231	0.155161	0.0481441	0.19036	-55	179	IL4I1	Cysteine and methionine metabolism
KEGG_2019_Human		D	Ether lipid metabolism	1/47	0.0140192	0.0369692	0.0122643	0.0321194	-42	177	AGPS	Ether lipid metabolism
KEGG_2019_Human		A	Aldosterone-regulated sodium reabsorption	1/37	0.0399396	0.153804	0.075067	0.276218	-55	176	IGF1	Aldosterone-regulated sodium reabsorption
KEGG_2019_Human		B	Fatty acid degradation	1/44	0.0303731	0.100852	0.0451957	0.148715	-49	170	HADHB	Fatty acid degradation
KEGG_2019_Human		B	Cytosolic DNA-sensing pathway	1/63	0.0432221	0.100852	0.063735	0.148715	-52	164	CCL4	Cytosolic DNA-sensing pathway
KEGG_2019_Human		I	Graft-versus-host disease	1/41	0.0788795	0.174365	0.0973552	0.215206	-61	155	IFNG	Graft-versus-host disease
KEGG_2019_Human		I	African trypanosomiasis	1/37	0.0714592	0.174365	0.0884852	0.215206	-58	153	IFNG	African trypanosomiasis
KEGG_2019_Human		J	ECM-receptor interaction	3/82	0.000395492	0.00553689	0.0004144	0.0058016	-19	149	COMP;COL1A1;THBS3	ECM-receptor interaction
KEGG_2019_Human		H	Cytosolic DNA-sensing pathway	1/63	0.0552299	0.115983	0.0865581	0.181772	-50	144	CCL5	Cytosolic DNA-sensing pathway
KEGG_2019_Human		H	TNF signaling pathway	1/110	0.0945431	0.13236	0.145723	0.211048	-60	143	CCL5	TNF signaling pathway
KEGG_2019_Human		I	RIG-I-like receptor signaling pathway	1/70	0.130974	0.212082	0.15926	0.262012	-70	143	CXCL10	RIG-I-like receptor signaling pathway
KEGG_2019_Human		G	Ether lipid metabolism	1/47	0.0324125	0.126157	0.0539934	0.205976	-41	140	PLA2G7	Ether lipid metabolism
KEGG_2019_Human		C	Glycerolipid metabolism	1/61	0.0535218	0.120206	0.0839597	0.188391	-46	136	LPL	Glycerolipid metabolism
KEGG_2019_Human		I	Salmonella infection	1/86	0.158475	0.233542	0.19167	0.282741	-74	136	IFNG	Salmonella infection
KEGG_2019_Human		K	Salivary secretion	1/90	0.0738355	0.163493	0.0895383	0.198263	-52	136	KCNN4	Salivary secretion
KEGG_2019_Human		A	Small cell lung cancer	1/93	0.0975054	0.153804	0.176119	0.276218	-57	132	LAMB3	Small cell lung cancer
KEGG_2019_Human		I	Cytokine-cytokine receptor interaction	6/294	2.41723e-05	0.00203047	5.38572e-05	0.00452401	-12	128	CXCL10;CXCL11;IFNG;GDF15;EPO;GDF6	Cytokine-cytokine receptor interaction
KEGG_2019_Human		B	Toll-like receptor signaling pathway	1/104	0.0704119	0.109539	0.102671	0.159589	-48	127	CCL4	Toll-like receptor signaling pathway
KEGG_2019_Human		G	Staphylococcus aureus infection	1/68	0.046577	0.126157	0.0767891	0.205976	-42	127	ITGAL	Staphylococcus aureus infection
KEGG_2019_Human		I	Allograft rejection	1/38	0.0733197	0.174365	0.0907104	0.215206	-48	124	IFNG	Allograft rejection
KEGG_2019_Human		H	Th17 cell differentiation	1/107	0.0920806	0.13236	0.142054	0.211048	-51	122	CD3D	Th17 cell differentiation
KEGG_2019_Human		A	Starch and sucrose metabolism	1/36	0.0388805	0.153804	0.0731611	0.276218	-37	121	TREH	Starch and sucrose metabolism
KEGG_2019_Human		C	PPAR signaling pathway	2/74	0.00198858	0.0268663	0.00485246	0.0810322	-19	121	ADIPOQ;LPL	PPAR signaling pathway
KEGG_2019_Human		A	Bladder cancer	1/41	0.0441651	0.153804	0.0826537	0.276218	-37	116	VEGFA	Bladder cancer
KEGG_2019_Human		J	Malaria	2/49	0.00332277	0.0232594	0.00361316	0.0252921	-20	116	COMP;THBS3	Malaria
KEGG_2019_Human		G	Complement and coagulation cascades	1/79	0.0539194	0.126157	0.0885338	0.205976	-38	111	C4BPB	Complement and coagulation cascades
KEGG_2019_Human		G	Human T-cell leukemia virus 1 infection	2/219	0.00995978	0.101372	0.0251642	0.192926	-23	107	MMP7;ITGAL	Human T-cell leukemia virus 1 infection
KEGG_2019_Human		J	Platelet activation	2/124	0.0198539	0.055276	0.0206711	0.0551327	-27	106	COL1A1;F2RL3	Platelet activation
KEGG_2019_Human		I	Riboflavin metabolism	1/8	0.0158912	0.0730223	0.0216639	0.106629	-25	103	ACP5	Riboflavin metabolism
KEGG_2019_Human		G	Natural killer cell mediated cytotoxicity	1/131	0.0879237	0.134816	0.142275	0.218156	-42	102	ITGAL	Natural killer cell mediated cytotoxicity
KEGG_2019_Human		K	Complement and coagulation cascades	1/79	0.0650946	0.163493	0.0791019	0.198263	-38	102	F12	Complement and coagulation cascades
KEGG_2019_Human		G	Rheumatoid arthritis	1/91	0.0618695	0.126157	0.101194	0.205976	-36	100	ITGAL	Rheumatoid arthritis
KEGG_2019_Human		I	IL-17 signaling pathway	2/93	0.0148768	0.0730223	0.021829	0.106629	-24	100	CXCL10;IFNG	IL-17 signaling pathway
KEGG_2019_Human		A	Melanoma	1/72	0.0763155	0.153804	0.139503	0.276218	-38	99	IGF1	Melanoma
KEGG_2019_Human		B	Glutathione metabolism	1/56	0.0385068	0.100852	0.0569417	0.148715	-30	99	GGT5	Glutathione metabolism
KEGG_2019_Human		C	Adipocytokine signaling pathway	2/69	0.00173182	0.0268663	0.00424729	0.0810322	-15	97	ADIPOQ;ACACB	Adipocytokine signaling pathway
KEGG_2019_Human		I	Fat digestion and absorption	1/41	0.0788795	0.174365	0.0973552	0.215206	-38	97	PLA2G2D	Fat digestion and absorption
KEGG_2019_Human		F	Taurine and hypotaurine metabolism	1/11	0.00658188	0.122516	0.0122315	0.232398	-19	95	CSAD	Taurine and hypotaurine metabolism
KEGG_2019_Human		H	Complement and coagulation cascades	1/79	0.0687906	0.127816	0.107105	0.202532	-35	93	KLKB1	Complement and coagulation cascades
KEGG_2019_Human		B	Taurine and hypotaurine metabolism	1/11	0.00767502	0.100852	0.0122315	0.148715	-19	92	GGT5	Taurine and hypotaurine metabolism
KEGG_2019_Human		I	Cytosolic DNA-sensing pathway	1/63	0.118669	0.212082	0.144697	0.262012	-43	92	CXCL10	Cytosolic DNA-sensing pathway
KEGG_2019_Human		C	Cholesterol metabolism	1/50	0.0440747	0.108718	0.0695483	0.171552	-29	89	LPL	Cholesterol metabolism
KEGG_2019_Human		I	Antigen processing and presentation	2/77	0.0103815	0.062289	0.0154137	0.092482	-19	89	IFNG;CD8A	Antigen processing and presentation
KEGG_2019_Human		I	Glycerolipid metabolism	1/61	0.115122	0.212082	0.140492	0.262012	-41	89	LIPC	Glycerolipid metabolism
KEGG_2019_Human		G	NF-kappa B signaling pathway	1/95	0.0645056	0.126157	0.10538	0.205976	-32	87	CCL13	NF-kappa B signaling pathway
KEGG_2019_Human		I	Bladder cancer	1/41	0.0788795	0.174365	0.0973552	0.215206	-34	87	CDKN2A	Bladder cancer
KEGG_2019_Human		B	NF-kappa B signaling pathway	1/95	0.0645056	0.109539	0.0942478	0.159589	-31	86	CCL4	NF-kappa B signaling pathway
KEGG_2019_Human		B	Valine, leucine and isoleucine degradation	1/48	0.0330914	0.100852	0.0491252	0.148715	-25	85	HADHB	Valine, leucine and isoleucine degradation
KEGG_2019_Human		C	TGF-beta signaling pathway	1/90	0.0780068	0.151908	0.120986	0.235605	-32	83	ACVR1C	TGF-beta signaling pathway
KEGG_2019_Human		H	Rheumatoid arthritis	1/91	0.0788403	0.127816	0.122238	0.205527	-33	83	CCL5	Rheumatoid arthritis
KEGG_2019_Human		H	Chagas disease (American trypanosomiasis)	2/103	0.00380823	0.0199932	0.00909146	0.05149	-15	83	CCL5;CD3D	Chagas disease (American trypanosomiasis)
KEGG_2019_Human		A	Cholesterol metabolism	1/50	0.0536074	0.153804	0.099511	0.276218	-28	82	ANGPTL4	Cholesterol metabolism
KEGG_2019_Human		I	Ether lipid metabolism	1/47	0.0899017	0.184189	0.110507	0.226405	-34	82	PLA2G2D	Ether lipid metabolism
KEGG_2019_Human		G	Viral myocarditis	1/59	0.0405303	0.126157	0.06708	0.205976	-25	80	ITGAL	Viral myocarditis
KEGG_2019_Human		K	Valine, leucine and isoleucine degradation	1/48	0.0400417	0.155161	0.0491252	0.19036	-25	79	IL4I1	Valine, leucine and isoleucine degradation
KEGG_2019_Human		K	Thiamine metabolism	1/15	0.0126788	0.148365	0.0162795	0.189079	-18	79	AK4	Thiamine metabolism
KEGG_2019_Human		I	Inflammatory bowel disease (IBD)	1/65	0.122202	0.212082	0.148882	0.262012	-36	77	IFNG	Inflammatory bowel disease (IBD)
KEGG_2019_Human		D	Protein processing in endoplasmic reticulum	1/165	0.0484962	0.0484962	0.0420925	0.0420925	-25	76	EDEM2	Protein processing in endoplasmic reticulum
KEGG_2019_Human		C	beta-Alanine metabolism	1/31	0.027547	0.10078	0.0441694	0.160148	-21	75	AOC3	beta-Alanine metabolism
KEGG_2019_Human		I	T cell receptor signaling pathway	2/101	0.0173863	0.0730223	0.0253878	0.106629	-18	74	IFNG;CD8A	T cell receptor signaling pathway
KEGG_2019_Human		H	Cytokine-cytokine receptor interaction	4/294	0.000118981	0.00166573	0.000553391	0.00774748	-8	72	CXCL9;CCL5;XCL1;CCL19	Cytokine-cytokine receptor interaction
KEGG_2019_Human		K	Tyrosine metabolism	1/36	0.0301752	0.155161	0.0372941	0.19036	-20	72	IL4I1	Tyrosine metabolism
KEGG_2019_Human		A	Toll-like receptor signaling pathway	1/104	0.108419	0.153804	0.194711	0.276218	-32	71	CCL3	Toll-like receptor signaling pathway
KEGG_2019_Human		A	TGF-beta signaling pathway	1/90	0.0945069	0.153804	0.170979	0.276218	-29	69	HAMP	TGF-beta signaling pathway
KEGG_2019_Human		J	Phagosome	2/152	0.028983	0.0624249	0.030054	0.0647317	-19	69	COMP;THBS3	Phagosome
KEGG_2019_Human		C	Tyrosine metabolism	1/36	0.0319224	0.10078	0.0509084	0.160148	-20	68	AOC3	Tyrosine metabolism
KEGG_2019_Human		G	Malaria	1/49	0.0337699	0.126157	0.0561858	0.205976	-20	68	ITGAL	Malaria
KEGG_2019_Human		I	Taurine and hypotaurine metabolism	1/11	0.0217867	0.0871468	0.0287859	0.115144	-17	65	GGT1	Taurine and hypotaurine metabolism
KEGG_2019_Human		C	AMPK signaling pathway	2/120	0.00512965	0.0379594	0.0121307	0.0897668	-12	64	ADIPOQ;ACACB	AMPK signaling pathway
KEGG_2019_Human		H	NF-kappa B signaling pathway	1/95	0.0821674	0.127816	0.127231	0.205527	-25	61	CCL19	NF-kappa B signaling pathway
KEGG_2019_Human		G	Osteoclast differentiation	1/127	0.0853489	0.134816	0.138244	0.218156	-24	60	CALCR	Osteoclast differentiation
KEGG_2019_Human		I	Glutathione metabolism	1/56	0.106194	0.202734	0.129895	0.247981	-26	59	GGT1	Glutathione metabolism
KEGG_2019_Human		I	alpha-Linolenic acid metabolism	1/25	0.0488468	0.136771	0.0613772	0.177782	-20	59	PLA2G2D	alpha-Linolenic acid metabolism
KEGG_2019_Human		I	Melanoma	1/72	0.134459	0.212082	0.163377	0.262012	-29	59	CDKN2A	Melanoma
KEGG_2019_Human		I	Cholesterol metabolism	1/50	0.0953644	0.186293	0.117015	0.228587	-25	59	LIPC	Cholesterol metabolism
KEGG_2019_Human		K	Phenylalanine, tyrosine and tryptophan biosynthesis	1/5	0.0042432	0.131539	0.00613221	0.189079	-11	58	IL4I1	Phenylalanine, tyrosine and tryptophan biosynthesis
KEGG_2019_Human		C	Type II diabetes mellitus	1/46	0.0406174	0.107346	0.0642568	0.169822	-18	57	ADIPOQ	Type II diabetes mellitus
KEGG_2019_Human		F	ECM-receptor interaction	1/82	0.0481185	0.144073	0.0819585	0.243844	-19	56	TNN	ECM-receptor interaction
KEGG_2019_Human		I	TNF signaling pathway	1/110	0.198142	0.260061	0.238074	0.312472	-34	55	CXCL10	TNF signaling pathway
KEGG_2019_Human		J	Pertussis	2/76	0.00781826	0.031273	0.00827841	0.0331136	-11	55	C1S;C2	Pertussis
KEGG_2019_Human		K	Tryptophan metabolism	1/42	0.0351203	0.155161	0.0432256	0.19036	-16	55	IL4I1	Tryptophan metabolism
KEGG_2019_Human		E	Nicotine addiction	1/40	0.0119416	0.080984	0.0208485	0.138975	-12	54	GABRP	Nicotine addiction
KEGG_2019_Human		J	Tyrosine metabolism	1/36	0.0611603	0.122321	0.064325	0.12865	-19	54	DBH	Tyrosine metabolism
KEGG_2019_Human		J	Protein digestion and absorption	2/90	0.0108201	0.0378703	0.0113758	0.0398152	-12	54	COL1A1;COL22A1	Protein digestion and absorption
KEGG_2019_Human		A	HIF-1 signaling pathway	3/100	0.000174316	0.0106333	0.0010979	0.0669719	-6	53	TF;IGF1;VEGFA	HIF-1 signaling pathway
KEGG_2019_Human		C	Pyruvate metabolism	1/39	0.0345387	0.10078	0.054931	0.160148	-16	53	ACACB	Pyruvate metabolism
KEGG_2019_Human		E	Morphine addiction	1/91	0.0269947	0.080984	0.0463251	0.138975	-15	53	GABRP	Morphine addiction
KEGG_2019_Human		I	Chronic myeloid leukemia	1/76	0.141388	0.212082	0.171555	0.262012	-27	53	CDKN2A	Chronic myeloid leukemia
KEGG_2019_Human		A	Human cytomegalovirus infection	2/225	0.0251046	0.147351	0.0771274	0.276218	-14	52	CCL3;VEGFA	Human cytomegalovirus infection
KEGG_2019_Human		A	Toxoplasmosis	1/113	0.117254	0.162557	0.209629	0.290622	-24	52	LAMB3	Toxoplasmosis
KEGG_2019_Human		B	Adherens junction	1/72	0.0492531	0.103431	0.0724063	0.152053	-17	51	PTPRF	Adherens junction
KEGG_2019_Human		G	Pantothenate and CoA biosynthesis	1/19	0.0132225	0.101372	0.0228214	0.192926	-12	51	VNN1	Pantothenate and CoA biosynthesis
KEGG_2019_Human		J	Cytokine-cytokine receptor interaction	4/294	0.00167292	0.0156139	0.00153069	0.0142864	-8	51	TNFSF15;IL34;IFNLR1;CCL17	Cytokine-cytokine receptor interaction
KEGG_2019_Human		C	Cytokine-cytokine receptor interaction	3/294	0.00217835	0.0268663	0.00714862	0.0810322	-8	49	GDF10;CNTFR;ACVR1C	Cytokine-cytokine receptor interaction
KEGG_2019_Human		H	Th1 and Th2 cell differentiation	1/92	0.0796731	0.127816	0.123489	0.205527	-19	48	CD3D	Th1 and Th2 cell differentiation
KEGG_2019_Human		F	Adipocytokine signaling pathway	1/69	0.0406344	0.144073	0.0695237	0.243844	-15	47	LEP	Adipocytokine signaling pathway
KEGG_2019_Human		I	Th17 cell differentiation	1/107	0.193285	0.257713	0.232415	0.309886	-28	46	IFNG	Th17 cell differentiation
KEGG_2019_Human		K	Purine metabolism	1/129	0.10421	0.172094	0.125711	0.206972	-21	46	AK4	Purine metabolism
KEGG_2019_Human		A	VEGF signaling pathway	1/59	0.0629608	0.153804	0.116078	0.276218	-16	45	VEGFA	VEGF signaling pathway
KEGG_2019_Human		E	GABAergic synapse	1/89	0.026408	0.080984	0.0453355	0.138975	-12	45	GABRP	GABAergic synapse
KEGG_2019_Human		J	IL-17 signaling pathway	1/93	0.150637	0.233694	0.155943	0.241689	-24	45	CCL17	IL-17 signaling pathway
KEGG_2019_Human		K	Phenylalanine metabolism	1/17	0.0143579	0.148365	0.018298	0.189079	-11	45	IL4I1	Phenylalanine metabolism
KEGG_2019_Human		C	Signaling pathways regulating pluripotency of stem cells	2/139	0.00682131	0.0420647	0.0159863	0.0985821	-9	44	ACVR1C;WNT9B	Signaling pathways regulating pluripotency of stem cells
KEGG_2019_Human		C	Phenylalanine metabolism	1/17	0.0151964	0.0702832	0.0250683	0.115941	-10	44	AOC3	Phenylalanine metabolism
KEGG_2019_Human		F	Cytokine-cytokine receptor interaction	2/294	0.0128964	0.122516	0.0344593	0.243844	-10	44	CCL22;LEP	Cytokine-cytokine receptor interaction
KEGG_2019_Human		D	Peroxisome	1/83	0.0246461	0.0369692	0.0214129	0.0321194	-12	43	AGPS	Peroxisome
KEGG_2019_Human		H	ECM-receptor interaction	1/82	0.0713127	0.127816	0.11091	0.202532	-16	43	SPP1	ECM-receptor interaction
KEGG_2019_Human		I	Proteoglycans in cancer	4/201	0.000681686	0.0133896	0.00130392	0.0238073	-6	43	WNT6;LUM;WNT16;DCN	Proteoglycans in cancer
KEGG_2019_Human		B	Pentose phosphate pathway	1/30	0.0208032	0.100852	0.0313304	0.148715	-11	42	TKT	Pentose phosphate pathway
KEGG_2019_Human		C	Propanoate metabolism	1/32	0.0284236	0.10078	0.0455207	0.160148	-12	42	ACACB	Propanoate metabolism
KEGG_2019_Human		H	Signaling pathways regulating pluripotency of stem cells	2/139	0.00682131	0.0250498	0.0159863	0.0581961	-8	42	WNT10B;WNT1	Signaling pathways regulating pluripotency of stem cells
KEGG_2019_Human		I	Malaria	1/49	0.0935471	0.186293	0.11485	0.228587	-18	42	IFNG	Malaria
KEGG_2019_Human		B	N-Glycan biosynthesis	1/50	0.0344479	0.100852	0.0510846	0.148715	-12	41	MGAT3	N-Glycan biosynthesis
KEGG_2019_Human		A	PPAR signaling pathway	1/74	0.0783538	0.153804	0.143055	0.276218	-16	40	ANGPTL4	PPAR signaling pathway
KEGG_2019_Human		H	T cell receptor signaling pathway	1/101	0.0871367	0.130705	0.134671	0.209488	-16	40	CD3D	T cell receptor signaling pathway
KEGG_2019_Human		J	Systemic lupus erythematosus	2/133	0.0226307	0.055276	0.0235254	0.0551327	-11	40	C1S;C2	Systemic lupus erythematosus
KEGG_2019_Human		A	Pancreatic cancer	1/75	0.0793714	0.153804	0.144826	0.276218	-15	38	VEGFA	Pancreatic cancer
KEGG_2019_Human		A	ECM-receptor interaction	1/82	0.0864645	0.153804	0.157126	0.276218	-15	38	LAMB3	ECM-receptor interaction
KEGG_2019_Human		F	C-type lectin receptor signaling pathway	1/104	0.0606621	0.144073	0.102671	0.243844	-14	38	CCL22	C-type lectin receptor signaling pathway
KEGG_2019_Human		H	Breast cancer	2/147	0.00759973	0.0250498	0.0177492	0.0581961	-8	38	WNT10B;WNT1	Breast cancer
KEGG_2019_Human		H	Prion diseases	1/35	0.0310488	0.0724472	0.049564	0.115502	-11	38	CCL5	Prion diseases
KEGG_2019_Human		I	Type I diabetes mellitus	1/43	0.0825679	0.177839	0.101759	0.219174	-15	38	IFNG	Type I diabetes mellitus
KEGG_2019_Human		A	Ovarian steroidogenesis	1/49	0.0525627	0.153804	0.0976524	0.276218	-13	37	IGF1	Ovarian steroidogenesis
KEGG_2019_Human		A	Hypertrophic cardiomyopathy (HCM)	1/85	0.0894883	0.153804	0.162346	0.276218	-15	36	IGF1	Hypertrophic cardiomyopathy (HCM)
KEGG_2019_Human		E	Regulation of actin cytoskeleton	1/214	0.0625146	0.0968345	0.105722	0.163334	-13	36	FGFR4	Regulation of actin cytoskeleton
KEGG_2019_Human		H	Primary immunodeficiency	1/37	0.0327952	0.0724947	0.052251	0.115502	-10	36	CD3D	Primary immunodeficiency
KEGG_2019_Human		K	Insulin secretion	1/86	0.0706659	0.163493	0.0857553	0.198263	-13	36	KCNN4	Insulin secretion
KEGG_2019_Human		A	Rap1 signaling pathway	2/206	0.0213005	0.14437	0.0661964	0.276218	-9	35	IGF1;VEGFA	Rap1 signaling pathway
KEGG_2019_Human		F	Protein digestion and absorption	1/90	0.0526975	0.144073	0.0895383	0.243844	-12	35	COL7A1	Protein digestion and absorption
KEGG_2019_Human		A	Mineral absorption	1/51	0.0546511	0.153804	0.101366	0.276218	-12	34	TF	Mineral absorption
KEGG_2019_Human		G	Pertussis	1/76	0.0519222	0.126157	0.0853439	0.205976	-11	33	C4BPB	Pertussis
KEGG_2019_Human		C	Melanogenesis	2/101	0.00366496	0.0339008	0.00876023	0.0810322	-6	31	ASIP;WNT9B	Melanogenesis
KEGG_2019_Human		F	AMPK signaling pathway	1/120	0.0696894	0.147122	0.117477	0.248007	-12	31	LEP	AMPK signaling pathway
GO_Biological_Process_2018		I	regulation of tooth mineralization (GO:0070170)	2/7	8.13868e-05	0.00936396	0.000158553	0.0162553	-3	30	WNT6;ASPN	regulation of tooth mineralization
GO_Molecular_Function_2018		H	G-protein coupled receptor binding (GO:0001664)	5/134	1.00064e-07	9.96131e-07	2.8925e-07	2.93659e-06	-2	30	WNT10B;CCL5;XCL1;CCL19;WNT1	G-protein coupled receptor binding
GO_Molecular_Function_2018		J	serine-type carboxypeptidase activity (GO:0004185)	2/10	0.000132708	0.00155932	0.000228675	0.00268693	-3	30	AEBP1;CPZ	serine-type carboxypeptidase activity
KEGG_2019_Human		H	Melanogenesis	2/101	0.00366496	0.0199932	0.00876023	0.05149	-5	30	WNT10B;WNT1	Melanogenesis
KEGG_2019_Human		K	Protein digestion and absorption	1/90	0.0738355	0.163493	0.0895383	0.198263	-11	30	KCNN4	Protein digestion and absorption
GO_Biological_Process_2018		H	positive regulation of T cell chemotaxis (GO:0010820)	2/10	3.42801e-05	0.00107982	6.60042e-05	0.00206151	-3	29	CCL5;XCL1	positive regulation of T cell chemotaxis
KEGG_2019_Human		E	Rap1 signaling pathway	1/206	0.0602377	0.0968345	0.101946	0.163334	-10	29	FGFR4	Rap1 signaling pathway
KEGG_2019_Human		H	Hematopoietic cell lineage	2/97	0.00338622	0.0199932	0.00811473	0.05149	-5	29	CD5;CD3D	Hematopoietic cell lineage
KEGG_2019_Human		I	Wnt signaling pathway	3/158	0.00385771	0.0335665	0.00651137	0.0587331	-5	29	WNT6;SFRP2;WNT16	Wnt signaling pathway
GO_Molecular_Function_2018		H	chemokine activity (GO:0008009)	4/47	7.9944e-08	9.96131e-07	2.40503e-07	2.93659e-06	-2	28	CXCL9;CCL5;XCL1;CCL19	chemokine activity
GO_Molecular_Function_2018		J	serine-type exopeptidase activity (GO:0070008)	2/10	0.000132708	0.00155932	0.000228675	0.00268693	-3	28	AEBP1;CPZ	serine-type exopeptidase activity
KEGG_2019_Human		E	Signaling pathways regulating pluripotency of stem cells	1/139	0.0409872	0.0934114	0.0698458	0.159015	-9	28	FGFR4	Signaling pathways regulating pluripotency of stem cells
GO_Biological_Process_2018		H	regulation of natural killer cell chemotaxis (GO:2000501)	2/8	2.13526e-05	0.000846466	4.50569e-05	0.00170315	-3	27	CCL5;XCL1	regulation of natural killer cell chemotaxis
KEGG_2019_Human		I	Toxoplasmosis	1/113	0.20297	0.262299	0.243694	0.314927	-17	27	IFNG	Toxoplasmosis
GO_Biological_Process_2018		I	regulation of smooth muscle cell apoptotic process (GO:0034391)	2/9	0.000139167	0.00936396	0.000241586	0.0162553	-3	26	IFNG;CDKN2A	regulation of smooth muscle cell apoptotic process
KEGG_2019_Human		A	Natural killer cell mediated cytotoxicity	1/131	0.134675	0.16885	0.238691	0.299119	-13	26	ULBP3	Natural killer cell mediated cytotoxicity
KEGG_2019_Human		I	Th1 and Th2 cell differentiation	1/92	0.168567	0.244132	0.203516	0.294747	-15	26	IFNG	Th1 and Th2 cell differentiation
KEGG_2019_Human		I	Primary immunodeficiency	1/37	0.0714592	0.174365	0.0884852	0.215206	-10	26	CD8A	Primary immunodeficiency
GO_Biological_Process_2018		A	regulated exocytosis (GO:0045055)	4/149	1.94958e-05	0.00481545	4.13616e-05	0.0102163	-2	25	TF;IGF1;F5;VEGFA	regulated exocytosis
GO_Biological_Process_2018		H	regulation of T cell chemotaxis (GO:0010819)	2/11	4.18756e-05	0.0011596	7.79582e-05	0.00210487	-3	25	CCL5;XCL1	regulation of T cell chemotaxis
GO_Biological_Process_2018		H	cellular response to interferon-gamma (GO:0071346)	4/117	3.19488e-06	0.000402555	5.94912e-06	0.00074959	-2	25	CCL5;XCL1;CCL19;HLA-DQB2	cellular response to interferon-gamma
KEGG_2019_Human		F	Tight junction	1/170	0.0973896	0.153503	0.162376	0.254452	-11	25	CD1E	Tight junction
GO_Biological_Process_2018		H	positive regulation of T-helper 1 type immune response (GO:0002827)	2/13	5.93239e-05	0.00149496	0.000104818	0.00264141	-2	24	XCL1;CCL19	positive regulation of T-helper 1 type immune response
GO_Biological_Process_2018		H	lymphocyte chemotaxis (GO:0048247)	4/45	6.68551e-08	2.47221e-05	1.55044e-07	5.43655e-05	-1	24	CXCL9;CCL5;XCL1;CCL19	lymphocyte chemotaxis
GO_Biological_Process_2018		I	positive regulation of cAMP-mediated signaling (GO:0043950)	2/9	0.000139167	0.00936396	0.000241586	0.0162553	-3	24	CXCL10;CXCL11	positive regulation of cAMP-mediated signaling
GO_Biological_Process_2018		I	positive regulation of smooth muscle cell apoptotic process (GO:0034393)	2/9	0.000139167	0.00936396	0.000241586	0.0162553	-3	24	IFNG;CDKN2A	positive regulation of smooth muscle cell apoptotic process
GO_Molecular_Function_2018		H	chemokine receptor binding (GO:0042379)	4/50	1.03048e-07	9.96131e-07	3.03785e-07	2.93659e-06	-1	24	CXCL9;CCL5;XCL1;CCL19	chemokine receptor binding
KEGG_2019_Human		H	Chemokine signaling pathway	4/190	2.17577e-05	0.000913824	0.000106083	0.00445547	-2	24	CXCL9;CCL5;XCL1;CCL19	Chemokine signaling pathway
GO_Biological_Process_2018		A	response to iron ion (GO:0010039)	2/14	0.000104273	0.0171702	0.000194362	0.032005	-2	23	TF;HAMP	response to iron ion
GO_Biological_Process_2018		B	negative regulation of axon regeneration (GO:0048681)	1/8	0.00558727	0.0593028	0.0068351	0.0690838	-4	23	RTN4RL1	negative regulation of axon regeneration
GO_Biological_Process_2018		I	T cell chemotaxis (GO:0010818)	2/11	0.000212079	0.0124861	0.000341699	0.0201175	-3	23	CXCL10;CXCL11	T cell chemotaxis
GO_Molecular_Function_2018		H	CCR chemokine receptor binding (GO:0048020)	3/39	5.48172e-06	3.1794e-05	1.27224e-05	7.37901e-05	-2	23	CCL5;XCL1;CCL19	CCR chemokine receptor binding
KEGG_2019_Human		I	Proteasome	1/45	0.086242	0.181108	0.106143	0.222901	-10	23	IFNG	Proteasome
KEGG_2019_Human		I	Signaling pathways regulating pluripotency of stem cells	2/139	0.0314896	0.115005	0.0451712	0.164973	-7	23	WNT6;WNT16	Signaling pathways regulating pluripotency of stem cells
KEGG_2019_Human		I	Pancreatic cancer	1/75	0.139661	0.212082	0.169518	0.262012	-12	23	CDKN2A	Pancreatic cancer
KEGG_2019_Human		I	Non-small cell lung cancer	1/66	0.123964	0.212082	0.150967	0.262012	-11	23	CDKN2A	Non-small cell lung cancer
GO_Biological_Process_2018		H	chemokine-mediated signaling pathway (GO:0070098)	4/53	1.30805e-07	2.47221e-05	2.87648e-07	5.43655e-05	-1	22	CXCL9;CCL5;XCL1;CCL19	chemokine-mediated signaling pathway
KEGG_2019_Human		A	Progesterone-mediated oocyte maturation	1/99	0.103474	0.153804	0.18631	0.276218	-10	22	IGF1	Progesterone-mediated oocyte maturation
KEGG_2019_Human		A	Prostate cancer	1/97	0.101489	0.153804	0.182926	0.276218	-9	22	IGF1	Prostate cancer
GO_Biological_Process_2018		H	dendritic cell chemotaxis (GO:0002407)	2/17	0.000103216	0.00216754	0.000170294	0.00357618	-2	21	CCL5;CCL19	dendritic cell chemotaxis
KEGG_2019_Human		A	Chagas disease (American trypanosomiasis)	1/103	0.107432	0.153804	0.193037	0.276218	-9	21	CCL3	Chagas disease (American trypanosomiasis)
KEGG_2019_Human		H	Wnt signaling pathway	2/158	0.00873268	0.0250498	0.0203039	0.0581961	-4	21	WNT10B;WNT1	Wnt signaling pathway
KEGG_2019_Human		I	Breast cancer	2/147	0.0348832	0.119507	0.0498873	0.170417	-6	21	WNT6;WNT16	Breast cancer
KEGG_2019_Human		I	HIF-1 signaling pathway	2/100	0.0170633	0.0730223	0.0249306	0.106629	-5	21	IFNG;EPO	HIF-1 signaling pathway
KEGG_2019_Human		J	C-type lectin receptor signaling pathway	1/104	0.166924	0.233694	0.172635	0.241689	-12	21	CCL17	C-type lectin receptor signaling pathway
GO_Biological_Process_2018		H	positive regulation of lymphocyte migration (GO:2000403)	2/18	0.000116056	0.00230891	0.000189102	0.00376214	-2	20	CCL5;XCL1	positive regulation of lymphocyte migration
GO_Biological_Process_2018		H	positive regulation of calcium ion transmembrane transport (GO:1904427)	2/26	0.000245475	0.00343665	0.000374413	0.00524179	-2	20	CXCL9;XCL1	positive regulation of calcium ion transmembrane transport
GO_Cellular_Component_2018		A	platelet alpha granule lumen (GO:0031093)	3/68	5.5272e-05	0.00171343	0.000109932	0.00340789	-2	20	IGF1;F5;VEGFA	platelet alpha granule lumen
GO_Biological_Process_2018		A	chemical homeostasis within a tissue (GO:0048875)	1/7	0.00767578	0.060267	0.0104718	0.0769717	-4	19	VEGFA	chemical homeostasis within a tissue
GO_Biological_Process_2018		C	positive regulation of cholesterol storage (GO:0010886)	1/7	0.00628396	0.0544637	0.00827753	0.0669122	-4	19	LPL	positive regulation of cholesterol storage
GO_Biological_Process_2018		F	leptin-mediated signaling pathway (GO:0033210)	1/9	0.00538813	0.044506	0.00621631	0.050413	-4	19	LEP	leptin-mediated signaling pathway
GO_Biological_Process_2018		H	neutrophil chemotaxis (GO:0030593)	3/54	1.47528e-05	0.000846466	2.56143e-05	0.00155947	-2	19	CCL5;XCL1;CCL19	neutrophil chemotaxis
GO_Biological_Process_2018		I	replicative senescence (GO:0090399)	2/12	0.000254172	0.0133017	0.000398117	0.0208348	-2	19	CDKN2A;WNT16	replicative senescence
GO_Biological_Process_2018		I	sulfur compound catabolic process (GO:0044273)	3/36	5.05471e-05	0.00936396	7.73215e-05	0.0153422	-2	19	LUM;GGT1;DCN	sulfur compound catabolic process
GO_Biological_Process_2018		K	regulation of endothelial cell chemotaxis to fibroblast growth factor (GO:2000544)	1/8	0.00678099	0.0565791	0.0086902	0.0698098	-4	19	CXCL13	regulation of endothelial cell chemotaxis to fibroblast growth factor
GO_Cellular_Component_2018		K	rough endoplasmic reticulum (GO:0005791)	2/29	0.000272392	0.00272392	0.000257433	0.00257433	-2	19	F12;HGFAC	rough endoplasmic reticulum
GO_Molecular_Function_2018		H	cytokine activity (GO:0005125)	5/156	2.1372e-07	1.54947e-06	6.01289e-07	4.35935e-06	-1	19	CXCL9;CCL5;XCL1;CCL19;WNT1	cytokine activity
GO_Molecular_Function_2018		I	cAMP-dependent protein kinase regulator activity (GO:0008603)	1/8	0.0158912	0.0452899	0.0209656	0.0597519	-5	19	CXCL10	cAMP-dependent protein kinase regulator activity
GO_Molecular_Function_2018		I	CXCR chemokine receptor binding (GO:0045236)	2/18	0.00058476	0.0166657	0.000985028	0.0280733	-3	19	CXCL10;CXCL11	CXCR chemokine receptor binding
GO_Molecular_Function_2018		K	adenylate kinase activity (GO:0004017)	1/8	0.00678099	0.0637498	0.00860116	0.0748289	-4	19	AK4	adenylate kinase activity
KEGG_2019_Human		A	Glioma	1/75	0.0793714	0.153804	0.144826	0.276218	-7	19	IGF1	Glioma
KEGG_2019_Human		I	Pancreatic secretion	1/98	0.178542	0.245861	0.215197	0.296337	-11	19	PLA2G2D	Pancreatic secretion
KEGG_2019_Human		I	Melanogenesis	2/101	0.0173863	0.0730223	0.0253878	0.106629	-5	19	WNT6;WNT16	Melanogenesis
GO_Biological_Process_2018		A	positive regulation of axon guidance (GO:1902669)	1/7	0.00767578	0.060267	0.0104718	0.0769717	-4	18	VEGFA	positive regulation of axon guidance
GO_Biological_Process_2018		B	negative regulation of neuron projection regeneration (GO:0070571)	1/9	0.00628364	0.0593028	0.00759193	0.0690838	-4	18	RTN4RL1	negative regulation of neuron projection regeneration
GO_Biological_Process_2018		G	negative regulation of complement activation (GO:0045916)	1/7	0.00489045	0.0565981	0.00717832	0.0767837	-3	18	C4BPB	negative regulation of complement activation
GO_Biological_Process_2018		H	positive regulation of neutrophil chemotaxis (GO:0090023)	2/25	0.000226713	0.0034279	0.000347878	0.00524179	-2	18	XCL1;CCL19	positive regulation of neutrophil chemotaxis
GO_Biological_Process_2018		K	regulation of smooth muscle cell differentiation (GO:0051150)	1/8	0.00678099	0.0565791	0.0086902	0.0698098	-4	18	OLFM2	regulation of smooth muscle cell differentiation
GO_Biological_Process_2018		K	nucleotide phosphorylation (GO:0046939)	1/9	0.00762556	0.0565791	0.00965144	0.0698098	-4	18	AK4	nucleotide phosphorylation
GO_Cellular_Component_2018		A	HFE-transferrin receptor complex (GO:1990712)	1/9	0.00985851	0.0424241	0.0137668	0.0586437	-4	18	TF	HFE-transferrin receptor complex
GO_Cellular_Component_2018		D	endoplasmic reticulum quality control compartment (GO:0044322)	1/10	0.00299663	0.0269696	0.00253983	0.0228149	-3	18	EDEM2	endoplasmic reticulum quality control compartment
GO_Molecular_Function_2018		C	primary amine oxidase activity (GO:0008131)	1/7	0.00628396	0.0483734	0.00764881	0.0558102	-4	18	AOC3	primary amine oxidase activity
GO_Molecular_Function_2018		E	NADP-retinol dehydrogenase activity (GO:0052650)	1/9	0.0026973	0.0226092	0.00348538	0.0274344	-3	18	RDH12	NADP-retinol dehydrogenase activity
GO_Molecular_Function_2018		I	cytokine activity (GO:0005125)	6/156	6.30478e-07	3.59373e-05	1.66192e-06	9.47295e-05	-1	18	CXCL10;CXCL11;IFNG;GDF15;EPO;GDF6	cytokine activity
KEGG_2019_Human		I	Hematopoietic cell lineage	2/97	0.0161103	0.0730223	0.0235801	0.106629	-4	18	EPO;CD8A	Hematopoietic cell lineage
KEGG_2019_Human		J	Phosphatidylinositol signaling system	1/99	0.159559	0.233694	0.165086	0.241689	-10	18	CDS1	Phosphatidylinositol signaling system
GO_Biological_Process_2018		A	regulation of histone deacetylase activity (GO:1901725)	1/7	0.00767578	0.060267	0.0104718	0.0769717	-3	17	VEGFA	regulation of histone deacetylase activity
GO_Biological_Process_2018		A	cellular iron ion homeostasis (GO:0006879)	2/57	0.00177716	0.060267	0.00267949	0.0769717	-3	17	TF;HAMP	cellular iron ion homeostasis
GO_Biological_Process_2018		A	platelet degranulation (GO:0002576)	4/125	9.74852e-06	0.00481545	2.11668e-05	0.0102163	-1	17	TF;IGF1;F5;VEGFA	platelet degranulation
GO_Biological_Process_2018		B	synaptic transmission, glycinergic (GO:0060012)	1/7	0.00489045	0.0593028	0.00607775	0.0690838	-3	17	GLRB	synaptic transmission, glycinergic
GO_Biological_Process_2018		D	glycoprotein catabolic process (GO:0006516)	1/11	0.00329588	0.0113701	0.00332099	0.0109819	-3	17	EDEM2	glycoprotein catabolic process
GO_Biological_Process_2018		F	negative regulation of appetite (GO:0032099)	1/9	0.00538813	0.044506	0.00621631	0.050413	-3	17	LEP	negative regulation of appetite
GO_Biological_Process_2018		F	chitin metabolic process (GO:0006030)	1/8	0.00479077	0.044506	0.00559623	0.050413	-3	17	CHIT1	chitin metabolic process
GO_Biological_Process_2018		G	positive regulation of T cell differentiation in thymus (GO:0033089)	1/7	0.00489045	0.0565981	0.00717832	0.0767837	-3	17	VNN1	positive regulation of T cell differentiation in thymus
GO_Biological_Process_2018		H	positive regulation of T cell migration (GO:2000406)	2/21	0.000159038	0.00300582	0.000251352	0.00475055	-2	17	CCL5;XCL1	positive regulation of T cell migration
GO_Biological_Process_2018		H	inflammatory response (GO:0006954)	4/253	6.65494e-05	0.00157223	0.000114392	0.00270252	-2	17	CXCL9;CCL5;XCL1;CCL19	inflammatory response
GO_Biological_Process_2018		I	regulation of cAMP metabolic process (GO:0030814)	2/14	0.000349563	0.0164644	0.000523588	0.024661	-2	17	CXCL10;CXCL11	regulation of cAMP metabolic process
GO_Biological_Process_2018		J	positive regulation of microglial cell activation (GO:1903980)	1/7	0.0121877	0.0888574	0.0164781	0.115754	-4	17	FAM19A3	positive regulation of microglial cell activation
GO_Biological_Process_2018		K	nucleoside diphosphate metabolic process (GO:0009132)	1/8	0.00678099	0.0565791	0.0086902	0.0698098	-3	17	AK4	nucleoside diphosphate metabolic process
GO_Cellular_Component_2018		A	extrinsic component of external side of plasma membrane (GO:0031232)	1/8	0.00876772	0.0424241	0.012398	0.0586437	-4	17	TF	extrinsic component of external side of plasma membrane
GO_Molecular_Function_2018		B	omega peptidase activity (GO:0008242)	1/8	0.00558727	0.0417416	0.00860116	0.0598943	-3	17	GGT5	omega peptidase activity
GO_Molecular_Function_2018		C	macromolecule transmembrane transporter activity (GO:0022884)	1/10	0.00896565	0.0483734	0.0105034	0.0558102	-4	17	AZGP1	macromolecule transmembrane transporter activity
GO_Molecular_Function_2018		D	mannosyl-oligosaccharide 1,2-alpha-mannosidase activity (GO:0004571)	1/9	0.0026973	0.0115356	0.00261529	0.0109823	-3	17	EDEM2	mannosyl-oligosaccharide 1,2-alpha-mannosidase activity
GO_Molecular_Function_2018		F	chitinase activity (GO:0004568)	1/8	0.00479077	0.028713	0.00548302	0.0316465	-3	17	CHIT1	chitinase activity
GO_Molecular_Function_2018		H	phospholipase activator activity (GO:0016004)	1/7	0.00628396	0.0182235	0.00903242	0.026194	-3	17	CCL5	phospholipase activator activity
GO_Molecular_Function_2018		I	protein-lysine 6-oxidase activity (GO:0004720)	1/7	0.0139184	0.0452899	0.0186571	0.0597519	-4	17	LOXL1	protein-lysine 6-oxidase activity
GO_Molecular_Function_2018		J	protease binding (GO:0002020)	4/119	5.40929e-05	0.00155932	7.90307e-05	0.00268693	-2	17	COMP;COL1A1;CCBE1;FAP	protease binding
KEGG_2019_Human		B	Cell adhesion molecules (CAMs)	1/145	0.0968828	0.127159	0.140183	0.18399	-7	17	PTPRF	Cell adhesion molecules (CAMs)
KEGG_2019_Human		B	Insulin resistance	1/108	0.0730258	0.109539	0.106393	0.159589	-6	17	PTPRF	Insulin resistance
KEGG_2019_Human		G	Cell adhesion molecules (CAMs)	1/145	0.0968828	0.139269	0.156254	0.224616	-7	17	ITGAL	Cell adhesion molecules (CAMs)
KEGG_2019_Human		H	Epithelial cell signaling in Helicobacter pylori infection	1/68	0.0594875	0.118975	0.0930247	0.186049	-6	17	CCL5	Epithelial cell signaling in Helicobacter pylori infection
GO_Biological_Process_2018		A	positive regulation of cell migration by vascular endothelial growth factor signaling pathway (GO:0038089)	1/8	0.00876772	0.060267	0.0117735	0.0769717	-3	16	VEGFA	positive regulation of cell migration by vascular endothelial growth factor signaling pathway
GO_Biological_Process_2018		A	regulation of positive chemotaxis (GO:0050926)	1/9	0.00985851	0.060267	0.0130735	0.0769717	-4	16	VEGFA	regulation of positive chemotaxis
GO_Biological_Process_2018		A	zinc II ion transmembrane import (GO:0071578)	1/8	0.00876772	0.060267	0.0117735	0.0769717	-3	16	SLC39A14	zinc II ion transmembrane import
GO_Biological_Process_2018		A	positive regulation of deacetylase activity (GO:0090045)	1/7	0.00767578	0.060267	0.0104718	0.0769717	-3	16	VEGFA	positive regulation of deacetylase activity
GO_Biological_Process_2018		A	positive regulation of macromolecule metabolic process (GO:0010604)	4/277	0.00021635	0.0213754	0.000430628	0.042546	-2	16	C1QTNF1;CCL3;IGF1;VEGFA	positive regulation of macromolecule metabolic process
GO_Biological_Process_2018		B	semaphorin-plexin signaling pathway involved in axon guidance (GO:1902287)	1/10	0.00697956	0.0593028	0.00834823	0.0690838	-3	16	PLXNA4	semaphorin-plexin signaling pathway involved in axon guidance
GO_Biological_Process_2018		B	axon regeneration (GO:0031103)	1/8	0.00558727	0.0593028	0.0068351	0.0690838	-3	16	RTN4RL1	axon regeneration
GO_Biological_Process_2018		B	transmembrane receptor protein tyrosine phosphatase signaling pathway (GO:0007185)	1/7	0.00489045	0.0593028	0.00607775	0.0690838	-3	16	PTPRF	transmembrane receptor protein tyrosine phosphatase signaling pathway
GO_Biological_Process_2018		C	nodal signaling pathway (GO:0038092)	1/9	0.00807251	0.0544637	0.0103369	0.0669122	-3	16	ACVR1C	nodal signaling pathway
GO_Biological_Process_2018		C	regulation of macrophage derived foam cell differentiation (GO:0010743)	2/30	0.000327859	0.0420422	0.000490117	0.0616762	-2	16	ADIPOQ;LPL	regulation of macrophage derived foam cell differentiation
GO_Biological_Process_2018		C	regulation of RNA biosynthetic process (GO:2001141)	1/8	0.00717861	0.0544637	0.00930771	0.0669122	-3	16	FCN3	regulation of RNA biosynthetic process
GO_Biological_Process_2018		C	positive regulation of sequestering of triglyceride (GO:0010890)	1/8	0.00717861	0.0544637	0.00930771	0.0669122	-3	16	LPL	positive regulation of sequestering of triglyceride
GO_Biological_Process_2018		C	response to hexose (GO:0009746)	2/28	0.000285202	0.0420422	0.000430356	0.0616762	-2	16	ADIPOQ;LPL	response to hexose
GO_Biological_Process_2018		D	cellular lipid biosynthetic process (GO:0097384)	1/8	0.0023979	0.0113701	0.00249152	0.0109819	-3	16	AGPS	cellular lipid biosynthetic process
GO_Biological_Process_2018		D	myoblast fusion (GO:0007520)	1/8	0.0023979	0.0113701	0.00249152	0.0109819	-3	16	ADAM12	myoblast fusion
GO_Biological_Process_2018		E	regulation of extracellular matrix organization (GO:1903053)	1/8	0.0023979	0.0485945	0.00249152	0.0476947	-3	16	FGFR4	regulation of extracellular matrix organization
GO_Biological_Process_2018		F	cellular response to leptin stimulus (GO:0044320)	1/8	0.00479077	0.044506	0.00559623	0.050413	-3	16	LEP	cellular response to leptin stimulus
GO_Biological_Process_2018		F	negative regulation of osteoblast proliferation (GO:0033689)	1/8	0.00479077	0.044506	0.00559623	0.050413	-3	16	TNN	negative regulation of osteoblast proliferation
GO_Biological_Process_2018		H	positive regulation of chemotaxis (GO:0050921)	3/49	1.0989e-05	0.000830767	1.94068e-05	0.00146716	-1	16	CXCL9;XCL1;CCL19	positive regulation of chemotaxis
GO_Biological_Process_2018		H	positive regulation of leukocyte chemotaxis (GO:0002690)	3/62	2.23933e-05	0.000846466	3.80473e-05	0.00159799	-2	16	CXCL9;CCL5;XCL1	positive regulation of leukocyte chemotaxis
GO_Biological_Process_2018		H	positive regulation of granulocyte chemotaxis (GO:0071624)	2/27	0.000264972	0.00357712	0.000401907	0.00542574	-2	16	XCL1;CCL19	positive regulation of granulocyte chemotaxis
GO_Biological_Process_2018		H	positive regulation of neutrophil migration (GO:1902624)	2/26	0.000245475	0.00343665	0.000374413	0.00524179	-2	16	XCL1;CCL19	positive regulation of neutrophil migration
GO_Biological_Process_2018		H	positive regulation of activation of Janus kinase activity (GO:0010536)	1/7	0.00628396	0.0315791	0.00827753	0.0403231	-3	16	CCL5	positive regulation of activation of Janus kinase activity
GO_Biological_Process_2018		H	positive regulation of smooth muscle cell migration (GO:0014911)	1/11	0.00985802	0.0315791	0.0123923	0.0403231	-3	16	CCL5	positive regulation of smooth muscle cell migration
GO_Biological_Process_2018		H	regulation of leukocyte chemotaxis (GO:0002688)	2/31	0.000350283	0.00413772	0.000521424	0.00615932	-2	16	CXCL9;XCL1	regulation of leukocyte chemotaxis
GO_Biological_Process_2018		H	positive regulation of macrophage chemotaxis (GO:0010759)	1/8	0.00717861	0.0315791	0.00930771	0.0403231	-3	16	CCL5	positive regulation of macrophage chemotaxis
GO_Biological_Process_2018		I	T cell migration (GO:0072678)	2/17	0.000520445	0.0188561	0.00074313	0.0267935	-2	16	CXCL10;CXCL11	T cell migration
GO_Biological_Process_2018		I	positive regulation of calcium ion transmembrane transport (GO:1904427)	2/26	0.00122963	0.0298341	0.0016231	0.0394328	-2	16	CXCL10;CXCL11	positive regulation of calcium ion transmembrane transport
GO_Biological_Process_2018		I	positive regulation of cyclic nucleotide metabolic process (GO:0030801)	2/17	0.000520445	0.0188561	0.00074313	0.0267935	-2	16	CXCL10;CXCL11	positive regulation of cyclic nucleotide metabolic process
GO_Biological_Process_2018		J	aromatic compound catabolic process (GO:0019439)	1/7	0.0121877	0.0888574	0.0164781	0.115754	-4	16	PON1	aromatic compound catabolic process
GO_Biological_Process_2018		J	dopamine catabolic process (GO:0042420)	1/7	0.0121877	0.0888574	0.0164781	0.115754	-4	16	DBH	dopamine catabolic process
GO_Biological_Process_2018		K	nucleoside phosphate biosynthetic process (GO:1901293)	1/10	0.00846946	0.0565791	0.0106118	0.0698098	-3	16	AK4	nucleoside phosphate biosynthetic process
GO_Biological_Process_2018		K	protein autoprocessing (GO:0016540)	1/10	0.00846946	0.0565791	0.0106118	0.0698098	-3	16	F12	protein autoprocessing
GO_Biological_Process_2018		K	nucleoside diphosphate phosphorylation (GO:0006165)	1/9	0.00762556	0.0565791	0.00965144	0.0698098	-3	16	AK4	nucleoside diphosphate phosphorylation
GO_Biological_Process_2018		K	nucleoside triphosphate biosynthetic process (GO:0009142)	1/10	0.00846946	0.0565791	0.0106118	0.0698098	-3	16	AK4	nucleoside triphosphate biosynthetic process
GO_Molecular_Function_2018		A	phospholipase activator activity (GO:0016004)	1/7	0.00767578	0.0392309	0.00834089	0.0410372	-3	16	CCL3	phospholipase activator activity
GO_Molecular_Function_2018		A	sterol esterase activity (GO:0004771)	1/10	0.0109482	0.0392309	0.0114522	0.0410372	-4	16	CES4A	sterol esterase activity
GO_Molecular_Function_2018		A	vascular endothelial growth factor receptor 2 binding (GO:0043184)	1/7	0.00767578	0.0392309	0.00834089	0.0410372	-3	16	VEGFA	vascular endothelial growth factor receptor 2 binding
GO_Molecular_Function_2018		B	acetyl-CoA C-acyltransferase activity (GO:0003988)	1/7	0.00489045	0.0417416	0.00764881	0.0598943	-3	16	HADHB	acetyl-CoA C-acyltransferase activity
GO_Molecular_Function_2018		C	activin-activated receptor activity (GO:0017002)	1/8	0.00717861	0.0483734	0.00860116	0.0558102	-3	16	ACVR1C	activin-activated receptor activity
GO_Molecular_Function_2018		D	mannosyl-oligosaccharide mannosidase activity (GO:0015924)	1/11	0.00329588	0.0115356	0.0031378	0.0109823	-3	16	EDEM2	mannosyl-oligosaccharide mannosidase activity
GO_Molecular_Function_2018		E	dipeptidase activity (GO:0016805)	1/11	0.00329588	0.0226092	0.00418136	0.0274344	-3	16	DPEP3	dipeptidase activity
GO_Molecular_Function_2018		G	phospholipase A2 activity (GO:0004623)	2/31	0.000209145	0.00481034	0.000356122	0.00819082	-2	16	PLA2G15;PLA2G7	phospholipase A2 activity
GO_Molecular_Function_2018		H	cytokine receptor binding (GO:0005126)	3/138	0.000243112	0.00117504	0.000474953	0.00229561	-2	16	CCL5;XCL1;CCL19	cytokine receptor binding
KEGG_2019_Human		A	AMPK signaling pathway	1/120	0.124068	0.168182	0.221052	0.299119	-8	16	IGF1	AMPK signaling pathway
KEGG_2019_Human		A	p53 signaling pathway	1/72	0.0763155	0.153804	0.139503	0.276218	-6	16	IGF1	p53 signaling pathway
KEGG_2019_Human		G	Leukocyte transendothelial migration	1/112	0.0756329	0.133812	0.122975	0.217571	-6	16	ITGAL	Leukocyte transendothelial migration
KEGG_2019_Human		G	Lysosome	2/123	0.00325281	0.0748145	0.00849776	0.192926	-3	16	PLA2G15;DNASE2B	Lysosome
KEGG_2019_Human		K	Signaling pathways regulating pluripotency of stem cells	1/139	0.111846	0.172094	0.134781	0.206972	-7	16	WNT3	Signaling pathways regulating pluripotency of stem cells
GO_Biological_Process_2018		A	positive regulation of smooth muscle cell migration (GO:0014911)	1/11	0.0120367	0.060267	0.0156687	0.0769717	-3	15	IGF1	positive regulation of smooth muscle cell migration
GO_Biological_Process_2018		A	negative regulation of muscle cell apoptotic process (GO:0010656)	1/7	0.00767578	0.060267	0.0104718	0.0769717	-3	15	IGF1	negative regulation of muscle cell apoptotic process
GO_Biological_Process_2018		A	positive regulation of neuroblast proliferation (GO:0002052)	1/8	0.00876772	0.060267	0.0117735	0.0769717	-3	15	VEGFA	positive regulation of neuroblast proliferation
GO_Biological_Process_2018		B	leukotriene D4 biosynthetic process (GO:1901750)	1/11	0.00767502	0.0593028	0.00910401	0.0690838	-3	15	GGT5	leukotriene D4 biosynthetic process
GO_Biological_Process_2018		B	regulation of response to oxidative stress (GO:1902882)	1/9	0.00628364	0.0593028	0.00759193	0.0690838	-3	15	STOX1	regulation of response to oxidative stress
GO_Biological_Process_2018		C	negative regulation of receptor biosynthetic process (GO:0010871)	1/7	0.00628396	0.0544637	0.00827753	0.0669122	-3	15	ADIPOQ	negative regulation of receptor biosynthetic process
GO_Biological_Process_2018		E	phosphate ion homeostasis (GO:0055062)	1/12	0.00359505	0.0485945	0.00359737	0.0476947	-3	15	FGFR4	phosphate ion homeostasis
GO_Biological_Process_2018		E	regulation of bile acid biosynthetic process (GO:0070857)	1/10	0.00299663	0.0485945	0.00304456	0.0476947	-3	15	FGFR4	regulation of bile acid biosynthetic process
GO_Biological_Process_2018		E	regulation of cholesterol homeostasis (GO:2000188)	1/13	0.00389415	0.0485945	0.00387369	0.0476947	-3	15	FGFR4	regulation of cholesterol homeostasis
GO_Biological_Process_2018		F	negative regulation of glucose import (GO:0046325)	1/9	0.00538813	0.044506	0.00621631	0.050413	-3	15	LEP	negative regulation of glucose import
GO_Biological_Process_2018		F	tyrosine phosphorylation of STAT protein (GO:0007260)	1/9	0.00538813	0.044506	0.00621631	0.050413	-3	15	LEP	tyrosine phosphorylation of STAT protein
GO_Biological_Process_2018		F	glucosamine-containing compound catabolic process (GO:1901072)	1/11	0.00658188	0.044506	0.00745544	0.050413	-3	15	CHIT1	glucosamine-containing compound catabolic process
GO_Biological_Process_2018		F	regulation of natural killer cell activation (GO:0032814)	1/10	0.00598517	0.044506	0.00683605	0.050413	-3	15	LEP	regulation of natural killer cell activation
GO_Biological_Process_2018		F	chitin catabolic process (GO:0006032)	1/8	0.00479077	0.044506	0.00559623	0.050413	-3	15	CHIT1	chitin catabolic process
GO_Biological_Process_2018		G	deadenylation-dependent decapping of nuclear-transcribed mRNA (GO:0000290)	1/9	0.00628364	0.0565981	0.00896546	0.0767837	-3	15	PATL2	deadenylation-dependent decapping of nuclear-transcribed mRNA
GO_Biological_Process_2018		H	monocyte chemotaxis (GO:0002548)	3/42	6.87427e-06	0.000649619	1.25153e-05	0.00118269	-1	15	CCL5;XCL1;CCL19	monocyte chemotaxis
GO_Biological_Process_2018		H	negative regulation of T cell mediated immunity (GO:0002710)	1/8	0.00717861	0.0315791	0.00930771	0.0403231	-3	15	XCL1	negative regulation of T cell mediated immunity
GO_Biological_Process_2018		H	positive regulation of release of sequestered calcium ion into cytosol (GO:0051281)	2/32	0.000373436	0.00427754	0.000553681	0.00633836	-2	15	CXCL9;XCL1	positive regulation of release of sequestered calcium ion into cytosol
GO_Biological_Process_2018		H	negative regulation of sequestering of calcium ion (GO:0051283)	2/25	0.000226713	0.0034279	0.000347878	0.00524179	-2	15	XCL1;CCL19	negative regulation of sequestering of calcium ion
GO_Biological_Process_2018		H	granulocyte chemotaxis (GO:0071621)	3/57	1.73737e-05	0.000846466	2.99003e-05	0.00155947	-1	15	CCL5;XCL1;CCL19	granulocyte chemotaxis
GO_Biological_Process_2018		I	granzyme-mediated apoptotic signaling pathway (GO:0008626)	1/7	0.0139184	0.07338	0.017022	0.0883355	-3	15	GZMH	granzyme-mediated apoptotic signaling pathway
GO_Biological_Process_2018		I	negative regulation of myeloid cell apoptotic process (GO:0033033)	1/7	0.0139184	0.07338	0.017022	0.0883355	-3	15	EPO	negative regulation of myeloid cell apoptotic process
GO_Biological_Process_2018		J	negative regulation of macrophage activation (GO:0043031)	1/8	0.013917	0.0888574	0.0185193	0.115754	-4	15	FAM19A3	negative regulation of macrophage activation
GO_Biological_Process_2018		J	regulation of microglial cell activation (GO:1903978)	1/8	0.013917	0.0888574	0.0185193	0.115754	-3	15	FAM19A3	regulation of microglial cell activation
GO_Biological_Process_2018		K	peptidyl-lysine hydroxylation (GO:0017185)	1/9	0.00762556	0.0565791	0.00965144	0.0698098	-3	15	PLOD2	peptidyl-lysine hydroxylation
GO_Biological_Process_2018		K	Wnt signaling pathway involved in midbrain dopaminergic neuron differentiation (GO:1904953)	1/11	0.00931268	0.0565791	0.0115713	0.0698098	-3	15	WNT3	Wnt signaling pathway involved in midbrain dopaminergic neuron differentiation
GO_Cellular_Component_2018		A	platelet alpha granule (GO:0031091)	3/91	0.000131806	0.00204299	0.000253226	0.003925	-2	15	IGF1;F5;VEGFA	platelet alpha granule
GO_Cellular_Component_2018		G	G-protein coupled receptor dimeric complex (GO:0038037)	1/9	0.00628364	0.0691201	0.00576168	0.0633785	-3	15	CALCR	G-protein coupled receptor dimeric complex
GO_Cellular_Component_2018		I	multivesicular body membrane (GO:0032585)	1/8	0.0158912	0.0537726	0.00931456	0.0248388	-4	15	PMEL	multivesicular body membrane
GO_Molecular_Function_2018		A	transferrin receptor binding (GO:1990459)	1/9	0.00985851	0.0392309	0.0104161	0.0410372	-3	15	TF	transferrin receptor binding
GO_Molecular_Function_2018		B	enoyl-CoA hydratase activity (GO:0004300)	1/9	0.00628364	0.0417416	0.00955269	0.0598943	-3	15	HADHB	enoyl-CoA hydratase activity
GO_Molecular_Function_2018		F	peptide hormone receptor binding (GO:0051428)	1/12	0.00717826	0.028713	0.00791163	0.0316465	-3	15	LEP	peptide hormone receptor binding
GO_Molecular_Function_2018		J	arylesterase activity (GO:0004064)	1/7	0.0121877	0.0384763	0.0152319	0.0473323	-3	15	PON1	arylesterase activity
KEGG_2019_Human		H	Human papillomavirus infection	3/330	0.00302212	0.0199932	0.00980762	0.05149	-3	15	WNT10B;SPP1;WNT1	Human papillomavirus infection
KEGG_2019_Human		K	Breast cancer	1/147	0.117911	0.172094	0.141977	0.206972	-7	15	WNT3	Breast cancer
GO_Biological_Process_2018		A	regulation of developmental growth (GO:0048638)	2/31	0.00052682	0.0371784	0.000843875	0.0595535	-2	14	NRCAM;IGF1	regulation of developmental growth
GO_Biological_Process_2018		A	protein kinase B signaling (GO:0043491)	2/36	0.000711383	0.0437138	0.00111918	0.0691091	-2	14	CCL3;IGF1	protein kinase B signaling
GO_Biological_Process_2018		A	positive regulation of receptor-mediated endocytosis (GO:0048260)	2/42	0.000968347	0.0437138	0.00149897	0.0740492	-2	14	TF;VEGFA	positive regulation of receptor-mediated endocytosis
GO_Biological_Process_2018		A	coronary vasculature morphogenesis (GO:0060977)	1/9	0.00985851	0.060267	0.0130735	0.0769717	-3	14	VEGFA	coronary vasculature morphogenesis
GO_Biological_Process_2018		A	positive regulation of protein import into nucleus, translocation (GO:0033160)	1/7	0.00767578	0.060267	0.0104718	0.0769717	-3	14	IGF1	positive regulation of protein import into nucleus, translocation
GO_Biological_Process_2018		A	cellular transition metal ion homeostasis (GO:0046916)	3/94	0.000145122	0.0179225	0.000262712	0.0324449	-2	14	TF;HAMP;SLC39A14	cellular transition metal ion homeostasis
GO_Biological_Process_2018		A	granulocyte migration (GO:0097530)	1/8	0.00876772	0.060267	0.0117735	0.0769717	-3	14	CCL3	granulocyte migration
GO_Biological_Process_2018		A	vascular smooth muscle cell development (GO:0097084)	1/7	0.00767578	0.060267	0.0104718	0.0769717	-3	14	VEGFA	vascular smooth muscle cell development
GO_Biological_Process_2018		A	regulation of cyclic nucleotide metabolic process (GO:0030799)	1/8	0.00876772	0.060267	0.0117735	0.0769717	-3	14	VEGFA	regulation of cyclic nucleotide metabolic process
GO_Biological_Process_2018		A	negative regulation of homotypic cell-cell adhesion (GO:0034111)	1/11	0.0120367	0.060267	0.0156687	0.0769717	-3	14	C1QTNF1	negative regulation of homotypic cell-cell adhesion
GO_Biological_Process_2018		B	regulation of axon regeneration (GO:0048679)	1/11	0.00767502	0.0593028	0.00910401	0.0690838	-3	14	RTN4RL1	regulation of axon regeneration
GO_Biological_Process_2018		C	Wnt signaling pathway involved in midbrain dopaminergic neuron differentiation (GO:1904953)	1/11	0.00985802	0.0544637	0.0123923	0.0669122	-3	14	WNT9B	Wnt signaling pathway involved in midbrain dopaminergic neuron differentiation
GO_Biological_Process_2018		C	brown fat cell differentiation (GO:0050873)	1/8	0.00717861	0.0544637	0.00930771	0.0669122	-3	14	ADIPOQ	brown fat cell differentiation
GO_Biological_Process_2018		C	positive regulation of protein kinase A signaling (GO:0010739)	1/8	0.00717861	0.0544637	0.00930771	0.0669122	-3	14	ADIPOQ	positive regulation of protein kinase A signaling
GO_Biological_Process_2018		E	retinol metabolic process (GO:0042572)	1/13	0.00389415	0.0485945	0.00387369	0.0476947	-3	14	RDH12	retinol metabolic process
GO_Biological_Process_2018		G	positive regulation of protein kinase A signaling (GO:0010739)	1/8	0.00558727	0.0565981	0.00807226	0.0767837	-3	14	CALCR	positive regulation of protein kinase A signaling
GO_Biological_Process_2018		G	regulation of T cell differentiation in thymus (GO:0033081)	1/13	0.00906459	0.0565981	0.0125308	0.0767837	-3	14	VNN1	regulation of T cell differentiation in thymus
GO_Biological_Process_2018		G	positive regulation of calcium ion import (GO:0090280)	1/11	0.00767502	0.0565981	0.0107496	0.0767837	-3	14	CALCR	positive regulation of calcium ion import
GO_Biological_Process_2018		H	immunological synapse formation (GO:0001771)	1/7	0.00628396	0.0315791	0.00827753	0.0403231	-3	14	CCL19	immunological synapse formation
GO_Biological_Process_2018		H	eosinophil chemotaxis (GO:0048245)	2/25	0.000226713	0.0034279	0.000347878	0.00524179	-2	14	CCL5;XCL1	eosinophil chemotaxis
GO_Biological_Process_2018		H	regulation of neutrophil chemotaxis (GO:0090022)	2/30	0.000327859	0.00399776	0.000490117	0.00599725	-2	14	XCL1;CCL19	regulation of neutrophil chemotaxis
GO_Biological_Process_2018		H	release of sequestered calcium ion into cytosol (GO:0051209)	2/28	0.000285202	0.00371746	0.000430356	0.00560947	-2	14	XCL1;CCL19	release of sequestered calcium ion into cytosol
GO_Biological_Process_2018		H	positive regulation of macrophage migration (GO:1905523)	1/8	0.00717861	0.0315791	0.00930771	0.0403231	-3	14	CCL5	positive regulation of macrophage migration
GO_Biological_Process_2018		H	Wnt signaling pathway involved in midbrain dopaminergic neuron differentiation (GO:1904953)	1/11	0.00985802	0.0315791	0.0123923	0.0403231	-3	14	WNT1	Wnt signaling pathway involved in midbrain dopaminergic neuron differentiation
GO_Biological_Process_2018		H	positive regulation of calcium ion transport into cytosol (GO:0010524)	2/33	0.000397317	0.00429102	0.000586886	0.00633836	-2	14	CXCL9;XCL1	positive regulation of calcium ion transport into cytosol
GO_Biological_Process_2018		H	positive regulation of dendritic cell antigen processing and presentation (GO:0002606)	1/7	0.00628396	0.0315791	0.00827753	0.0403231	-3	14	CCL19	positive regulation of dendritic cell antigen processing and presentation
GO_Biological_Process_2018		H	neutrophil migration (GO:1990266)	3/59	1.92812e-05	0.000846466	3.30047e-05	0.00155947	-1	14	CCL5;XCL1;CCL19	neutrophil migration
GO_Biological_Process_2018		J	platelet dense granule organization (GO:0060155)	1/7	0.0121877	0.0888574	0.0164781	0.115754	-3	14	F2RL3	platelet dense granule organization
GO_Biological_Process_2018		J	collagen biosynthetic process (GO:0032964)	1/7	0.0121877	0.0888574	0.0164781	0.115754	-3	14	COL1A1	collagen biosynthetic process
GO_Biological_Process_2018		K	endothelial cell chemotaxis (GO:0035767)	1/10	0.00846946	0.0565791	0.0106118	0.0698098	-3	14	CXCL13	endothelial cell chemotaxis
GO_Biological_Process_2018		K	AMP metabolic process (GO:0046033)	1/8	0.00678099	0.0565791	0.0086902	0.0698098	-3	14	AK4	AMP metabolic process
GO_Molecular_Function_2018		B	3-hydroxyacyl-CoA dehydrogenase activity (GO:0003857)	1/9	0.00628364	0.0417416	0.00955269	0.0598943	-3	14	HADHB	3-hydroxyacyl-CoA dehydrogenase activity
GO_Molecular_Function_2018		C	peptide hormone receptor binding (GO:0051428)	1/12	0.0107496	0.0483734	0.0124023	0.0558102	-3	14	UCN2	peptide hormone receptor binding
GO_Molecular_Function_2018		F	lipoprotein lipase activity (GO:0004465)	1/9	0.00538813	0.028713	0.00609065	0.0316465	-3	14	AOAH	lipoprotein lipase activity
GO_Molecular_Function_2018		F	dipeptidase activity (GO:0016805)	1/11	0.00658188	0.028713	0.00730495	0.0316465	-3	14	DPEP2	dipeptidase activity
GO_Molecular_Function_2018		H	lipase activator activity (GO:0060229)	1/8	0.00717861	0.0189254	0.0101562	0.0267753	-3	14	CCL5	lipase activator activity
GO_Molecular_Function_2018		I	Wnt-activated receptor activity (GO:0042813)	2/23	0.00096086	0.0182563	0.00154408	0.0293375	-2	14	SFRP2;FRZB	Wnt-activated receptor activity
GO_Molecular_Function_2018		J	CDP-alcohol phosphatidyltransferase activity (GO:0017169)	1/8	0.013917	0.0384763	0.0171202	0.0473323	-3	14	CDS1	CDP-alcohol phosphatidyltransferase activity
GO_Molecular_Function_2018		J	metalloexopeptidase activity (GO:0008235)	3/55	0.000121011	0.00155932	0.000176005	0.00268693	-2	14	DPEP1;AEBP1;CPZ	metalloexopeptidase activity
KEGG_2019_Human		C	Insulin resistance	1/108	0.0929021	0.156245	0.143279	0.240968	-6	14	ACACB	Insulin resistance
KEGG_2019_Human		F	Hematopoietic cell lineage	1/97	0.0566875	0.144073	0.0961256	0.243844	-5	14	CD1E	Hematopoietic cell lineage
KEGG_2019_Human		I	Leishmaniasis	1/74	0.137931	0.212082	0.167476	0.262012	-7	14	IFNG	Leishmaniasis
KEGG_2019_Human		I	Cushing syndrome	3/155	0.00365583	0.0335665	0.00618031	0.0587331	-2	14	WNT6;CDKN2A;WNT16	Cushing syndrome
GO_Biological_Process_2018		A	release of sequestered calcium ion into cytosol by sarcoplasmic reticulum (GO:0014808)	1/7	0.00767578	0.060267	0.0104718	0.0769717	-3	13	CCL3	release of sequestered calcium ion into cytosol by sarcoplasmic reticulum
GO_Biological_Process_2018		A	endothelial cell chemotaxis (GO:0035767)	1/10	0.0109482	0.060267	0.0143719	0.0769717	-3	13	VEGFA	endothelial cell chemotaxis
GO_Biological_Process_2018		A	positive regulation of protein kinase C signaling (GO:0090037)	1/8	0.00876772	0.060267	0.0117735	0.0769717	-3	13	VEGFA	positive regulation of protein kinase C signaling
GO_Biological_Process_2018		A	regulation of smooth muscle cell apoptotic process (GO:0034391)	1/9	0.00985851	0.060267	0.0130735	0.0769717	-3	13	IGF1	regulation of smooth muscle cell apoptotic process
GO_Biological_Process_2018		A	surfactant homeostasis (GO:0043129)	1/7	0.00767578	0.060267	0.0104718	0.0769717	-3	13	VEGFA	surfactant homeostasis
GO_Biological_Process_2018		A	positive regulation of blood vessel endothelial cell proliferation involved in sprouting angiogenesis (GO:1903589)	1/8	0.00876772	0.060267	0.0117735	0.0769717	-3	13	VEGFA	positive regulation of blood vessel endothelial cell proliferation involved in sprouting angiogenesis
GO_Biological_Process_2018		A	negative regulation of platelet aggregation (GO:0090331)	1/9	0.00985851	0.060267	0.0130735	0.0769717	-3	13	C1QTNF1	negative regulation of platelet aggregation
GO_Biological_Process_2018		A	regulation of epithelial cell proliferation (GO:0050678)	2/73	0.00289532	0.060267	0.00429171	0.0769717	-2	13	IGF1;VEGFA	regulation of epithelial cell proliferation
GO_Biological_Process_2018		A	vascular endothelial growth factor signaling pathway (GO:0038084)	1/8	0.00876772	0.060267	0.0117735	0.0769717	-3	13	VEGFA	vascular endothelial growth factor signaling pathway
GO_Biological_Process_2018		A	positive regulation of calcium-mediated signaling (GO:0050850)	2/29	0.000460589	0.0371784	0.000744351	0.0595535	-2	13	CCL3;IGF1	positive regulation of calcium-mediated signaling
GO_Biological_Process_2018		A	regulation of sensory perception (GO:0051931)	1/9	0.00985851	0.060267	0.0130735	0.0769717	-3	13	CCL3	regulation of sensory perception
GO_Biological_Process_2018		A	negative regulation of digestive system process (GO:0060457)	1/7	0.00767578	0.060267	0.0104718	0.0769717	-3	13	HAMP	negative regulation of digestive system process
GO_Biological_Process_2018		B	response to axon injury (GO:0048678)	1/12	0.00837003	0.0593028	0.00985927	0.0690838	-3	13	RTN4RL1	response to axon injury
GO_Biological_Process_2018		B	complement activation, lectin pathway (GO:0001867)	1/11	0.00767502	0.0593028	0.00910401	0.0690838	-3	13	FCN2	complement activation, lectin pathway
GO_Biological_Process_2018		B	N-acetylglucosamine metabolic process (GO:0006044)	1/15	0.0104523	0.0611656	0.0121219	0.0709356	-3	13	MGAT3	N-acetylglucosamine metabolic process
GO_Biological_Process_2018		B	regulation of natural killer cell chemotaxis (GO:2000501)	1/8	0.00558727	0.0593028	0.0068351	0.0690838	-3	13	CCL4	regulation of natural killer cell chemotaxis
GO_Biological_Process_2018		B	cardiolipin acyl-chain remodeling (GO:0035965)	1/7	0.00489045	0.0593028	0.00607775	0.0690838	-2	13	HADHB	cardiolipin acyl-chain remodeling
GO_Biological_Process_2018		B	neuron projection regeneration (GO:0031102)	1/11	0.00767502	0.0593028	0.00910401	0.0690838	-3	13	RTN4RL1	neuron projection regeneration
GO_Biological_Process_2018		B	positive regulation of cell cycle G2/M phase transition (GO:1902751)	1/18	0.0125306	0.0638657	0.0143798	0.0732907	-3	13	STOX1	positive regulation of cell cycle G2/M phase transition
GO_Biological_Process_2018		B	cellular modified amino acid catabolic process (GO:0042219)	1/13	0.00906459	0.0593028	0.010614	0.0690838	-3	13	GGT5	cellular modified amino acid catabolic process
GO_Biological_Process_2018		B	motor neuron axon guidance (GO:0008045)	1/11	0.00767502	0.0593028	0.00910401	0.0690838	-3	13	PLXNA4	motor neuron axon guidance
GO_Biological_Process_2018		C	regulation of low-density lipoprotein particle receptor biosynthetic process (GO:0045714)	1/8	0.00717861	0.0544637	0.00930771	0.0669122	-3	13	ADIPOQ	regulation of low-density lipoprotein particle receptor biosynthetic process
GO_Biological_Process_2018		C	amine metabolic process (GO:0009308)	1/7	0.00628396	0.0544637	0.00827753	0.0669122	-3	13	AOC3	amine metabolic process
GO_Biological_Process_2018		C	positive regulation of myeloid cell apoptotic process (GO:0033034)	1/8	0.00717861	0.0544637	0.00930771	0.0669122	-3	13	ADIPOQ	positive regulation of myeloid cell apoptotic process
GO_Biological_Process_2018		C	positive regulation of epithelial cell differentiation involved in kidney development (GO:2000698)	1/8	0.00717861	0.0544637	0.00930771	0.0669122	-3	13	ADIPOQ	positive regulation of epithelial cell differentiation involved in kidney development
GO_Biological_Process_2018		C	very-low-density lipoprotein particle remodeling (GO:0034372)	1/10	0.00896565	0.0544637	0.0113651	0.0669122	-3	13	LPL	very-low-density lipoprotein particle remodeling
GO_Biological_Process_2018		C	regulation of vascular associated smooth muscle cell migration (GO:1904752)	1/9	0.00807251	0.0544637	0.0103369	0.0669122	-3	13	ADIPOQ	regulation of vascular associated smooth muscle cell migration
GO_Biological_Process_2018		C	negative regulation of phagocytosis (GO:0050765)	1/10	0.00896565	0.0544637	0.0113651	0.0669122	-3	13	ADIPOQ	negative regulation of phagocytosis
GO_Biological_Process_2018		D	positive regulation of protein exit from endoplasmic reticulum (GO:0070863)	1/11	0.00329588	0.0113701	0.00332099	0.0109819	-2	13	EDEM2	positive regulation of protein exit from endoplasmic reticulum
GO_Biological_Process_2018		D	positive regulation of ERAD pathway (GO:1904294)	1/14	0.00419318	0.0113701	0.00414995	0.0109819	-2	13	EDEM2	positive regulation of ERAD pathway
GO_Biological_Process_2018		D	protein alpha-1,2-demannosylation (GO:0036508)	1/25	0.00747753	0.0118394	0.00718502	0.0113763	-3	13	EDEM2	protein alpha-1,2-demannosylation
GO_Biological_Process_2018		F	response to leptin (GO:0044321)	1/9	0.00538813	0.044506	0.00621631	0.050413	-3	13	LEP	response to leptin
GO_Biological_Process_2018		F	regulation of brown fat cell differentiation (GO:0090335)	1/9	0.00538813	0.044506	0.00621631	0.050413	-2	13	LEP	regulation of brown fat cell differentiation
GO_Biological_Process_2018		F	regulation of lymphocyte activation (GO:0051249)	1/14	0.00837003	0.0457132	0.00931156	0.0508555	-3	13	LEP	regulation of lymphocyte activation
GO_Biological_Process_2018		F	phosphatidylserine acyl-chain remodeling (GO:0036150)	1/22	0.013124	0.0512575	0.0142461	0.0555348	-3	13	PLA1A	phosphatidylserine acyl-chain remodeling
GO_Biological_Process_2018		G	inflammatory response (GO:0006954)	3/253	0.000656752	0.0452539	0.00137915	0.0767837	-2	13	CCL13;VNN1;ITGAL	inflammatory response
GO_Biological_Process_2018		G	dimeric G-protein coupled receptor signaling pathway (GO:0038042)	1/9	0.00628364	0.0565981	0.00896546	0.0767837	-3	13	CALCR	dimeric G-protein coupled receptor signaling pathway
GO_Biological_Process_2018		H	regulation of T-helper 1 cell differentiation (GO:0045625)	1/8	0.00717861	0.0315791	0.00930771	0.0403231	-3	13	CCL19	regulation of T-helper 1 cell differentiation
GO_Biological_Process_2018		H	regulation of cell projection organization (GO:0031344)	1/8	0.00717861	0.0315791	0.00930771	0.0403231	-3	13	CCL19	regulation of cell projection organization
GO_Biological_Process_2018		H	regulation of T-helper 2 cell cytokine production (GO:2000551)	1/9	0.00807251	0.0315791	0.0103369	0.0403231	-3	13	XCL1	regulation of T-helper 2 cell cytokine production
GO_Biological_Process_2018		H	response to interferon-gamma (GO:0034341)	3/69	3.09006e-05	0.00106186	5.17228e-05	0.00177738	-1	13	CCL5;XCL1;CCL19	response to interferon-gamma
GO_Biological_Process_2018		H	positive regulation of production of molecular mediator of immune response (GO:0002702)	1/10	0.00896565	0.0315791	0.0113651	0.0403231	-3	13	XCL1	positive regulation of production of molecular mediator of immune response
GO_Biological_Process_2018		H	negative regulation of fat cell differentiation (GO:0045599)	2/33	0.000397317	0.00429102	0.000586886	0.00633836	-2	13	WNT10B;WNT1	negative regulation of fat cell differentiation
GO_Biological_Process_2018		H	positive regulation of hydrolase activity (GO:0051345)	3/173	0.000471717	0.00481917	0.000725937	0.00725306	-2	13	CCL5;XCL1;CCL19	positive regulation of hydrolase activity
GO_Biological_Process_2018		H	eosinophil migration (GO:0072677)	2/25	0.000226713	0.0034279	0.000347878	0.00524179	-2	13	CCL5;XCL1	eosinophil migration
GO_Biological_Process_2018		H	regulation of release of sequestered calcium ion into cytosol (GO:0051279)	2/50	0.000913492	0.00803024	0.00129465	0.0113809	-2	13	CXCL9;XCL1	regulation of release of sequestered calcium ion into cytosol
GO_Biological_Process_2018		H	negative regulation of dendritic cell apoptotic process (GO:2000669)	1/8	0.00717861	0.0315791	0.00930771	0.0403231	-3	13	CCL19	negative regulation of dendritic cell apoptotic process
GO_Biological_Process_2018		H	positive regulation of insulin-like growth factor receptor signaling pathway (GO:0043568)	1/8	0.00717861	0.0315791	0.00930771	0.0403231	-3	13	WNT1	positive regulation of insulin-like growth factor receptor signaling pathway
GO_Biological_Process_2018		H	positive regulation of bone resorption (GO:0045780)	1/11	0.00985802	0.0315791	0.0123923	0.0403231	-3	13	SPP1	positive regulation of bone resorption
GO_Biological_Process_2018		H	calcium ion transmembrane import into cytosol (GO:0097553)	2/37	0.000500094	0.00497462	0.000729143	0.00725306	-2	13	XCL1;CCL19	calcium ion transmembrane import into cytosol
GO_Biological_Process_2018		H	response to interleukin-4 (GO:0070670)	1/10	0.00896565	0.0315791	0.0113651	0.0403231	-3	13	XCL1	response to interleukin-4
GO_Biological_Process_2018		H	positive regulation of cAMP-mediated signaling (GO:0043950)	1/9	0.00807251	0.0315791	0.0103369	0.0403231	-3	13	CXCL9	positive regulation of cAMP-mediated signaling
GO_Biological_Process_2018		H	positive regulation of lipid transport (GO:0032370)	1/8	0.00717861	0.0315791	0.00930771	0.0403231	-3	13	SPP1	positive regulation of lipid transport
GO_Biological_Process_2018		H	positive regulation of immunoglobulin mediated immune response (GO:0002891)	1/9	0.00807251	0.0315791	0.0103369	0.0403231	-3	13	XCL1	positive regulation of immunoglobulin mediated immune response
GO_Biological_Process_2018		H	positive regulation of leukocyte migration (GO:0002687)	2/35	0.000447257	0.0046962	0.00065613	0.00688936	-2	13	CXCL9;XCL1	positive regulation of leukocyte migration
GO_Biological_Process_2018		H	response to interleukin-1 (GO:0070555)	3/77	4.29481e-05	0.0011596	7.08986e-05	0.00206151	-1	13	CCL5;XCL1;CCL19	response to interleukin-1
GO_Biological_Process_2018		I	negative regulation of cell proliferation (GO:0008285)	5/364	0.000757313	0.020982	0.0010345	0.0286617	-2	13	SFRP2;IFNG;FRZB;CDKN2A;IGFBP6	negative regulation of cell proliferation
GO_Biological_Process_2018		I	regulation of macrophage apoptotic process (GO:2000109)	1/7	0.0139184	0.07338	0.017022	0.0883355	-3	13	CDKN2A	regulation of macrophage apoptotic process
GO_Biological_Process_2018		I	positive regulation of cell aging (GO:0090343)	1/9	0.0178602	0.0737909	0.0212335	0.0885044	-3	13	CDKN2A	positive regulation of cell aging
GO_Biological_Process_2018		I	regulation of cell proliferation (GO:0042127)	9/741	1.22064e-05	0.00574922	1.85563e-05	0.00874004	-1	13	CXCL10;CXCL11;SFRP2;IFNG;FRZB;CDKN2A;EPO;MZB1;IGFBP6	regulation of cell proliferation
GO_Biological_Process_2018		I	regulation of protein deacetylation (GO:0090311)	1/9	0.0178602	0.0737909	0.0212335	0.0885044	-3	13	IFNG	regulation of protein deacetylation
GO_Biological_Process_2018		I	positive regulation of cellular senescence (GO:2000774)	1/8	0.0158912	0.07338	0.01913	0.0883355	-3	13	CDKN2A	positive regulation of cellular senescence
GO_Biological_Process_2018		I	negative regulation of growth (GO:0045926)	3/121	0.00181262	0.030851	0.00231993	0.0394328	-2	13	SFRP2;FRZB;CDKN2A	negative regulation of growth
GO_Biological_Process_2018		I	regulation of leukocyte chemotaxis (GO:0002688)	2/31	0.00174824	0.030851	0.00225212	0.0394328	-2	13	CXCL10;CXCL11	regulation of leukocyte chemotaxis
GO_Biological_Process_2018		J	norepinephrine biosynthetic process (GO:0042421)	1/8	0.013917	0.0888574	0.0185193	0.115754	-3	13	DBH	norepinephrine biosynthetic process
GO_Biological_Process_2018		J	positive regulation of catecholamine secretion (GO:0033605)	1/7	0.0121877	0.0888574	0.0164781	0.115754	-3	13	GDNF	positive regulation of catecholamine secretion
GO_Biological_Process_2018		J	venous blood vessel development (GO:0060841)	1/8	0.013917	0.0888574	0.0185193	0.115754	-3	13	CCBE1	venous blood vessel development
GO_Biological_Process_2018		J	catecholamine catabolic process (GO:0042424)	1/9	0.0156433	0.0888574	0.0205564	0.115754	-3	13	DBH	catecholamine catabolic process
GO_Biological_Process_2018		J	positive regulation of execution phase of apoptosis (GO:1900119)	1/11	0.0190872	0.0902534	0.0246183	0.115754	-3	13	FAP	positive regulation of execution phase of apoptosis
GO_Biological_Process_2018		J	insulin metabolic process (GO:1901142)	1/9	0.0156433	0.0888574	0.0205564	0.115754	-3	13	CPZ	insulin metabolic process
GO_Biological_Process_2018		K	B cell chemotaxis (GO:0035754)	1/7	0.00593574	0.0565791	0.0077281	0.0698098	-3	13	CXCL13	B cell chemotaxis
GO_Biological_Process_2018		K	positive regulation of T cell chemotaxis (GO:0010820)	1/10	0.00846946	0.0565791	0.0106118	0.0698098	-3	13	CXCL13	positive regulation of T cell chemotaxis
GO_Biological_Process_2018		K	erythrose 4-phosphate/phosphoenolpyruvate family amino acid catabolic process (GO:1902222)	1/12	0.0101552	0.0565791	0.01253	0.0698098	-3	13	IL4I1	erythrose 4-phosphate/phosphoenolpyruvate family amino acid catabolic process
GO_Cellular_Component_2018		A	axon initial segment (GO:0043194)	1/10	0.0109482	0.0424241	0.0151339	0.0586437	-3	13	NRCAM	axon initial segment
GO_Cellular_Component_2018		I	lysosomal lumen (GO:0043202)	3/87	0.000699234	0.00814155	8.70371e-05	0.0010113	-2	13	LUM;CTSK;DCN	lysosomal lumen
GO_Molecular_Function_2018		A	lipase activator activity (GO:0060229)	1/8	0.00876772	0.0392309	0.009379	0.0410372	-3	13	CCL3	lipase activator activity
GO_Molecular_Function_2018		A	vascular endothelial growth factor receptor binding (GO:0005172)	1/10	0.0109482	0.0392309	0.0114522	0.0410372	-3	13	VEGFA	vascular endothelial growth factor receptor binding
GO_Molecular_Function_2018		A	protein kinase C activity (GO:0004697)	1/11	0.0120367	0.0398136	0.0124874	0.0413044	-3	13	CCL3	protein kinase C activity
GO_Molecular_Function_2018		C	lipoprotein lipase activity (GO:0004465)	1/9	0.00807251	0.0483734	0.00955269	0.0558102	-3	13	LPL	lipoprotein lipase activity
GO_Molecular_Function_2018		D	FAD binding (GO:0071949)	1/20	0.00598577	0.0139668	0.00548684	0.0128026	-3	13	AGPS	FAD binding
GO_Molecular_Function_2018		I	omega peptidase activity (GO:0008242)	1/8	0.0158912	0.0452899	0.0209656	0.0597519	-3	13	GGT1	omega peptidase activity
GO_Molecular_Function_2018		J	serine-type peptidase activity (GO:0008236)	4/221	0.000580653	0.00389867	0.000795914	0.005344	-2	13	MMP11;FAP;C1S;C2	serine-type peptidase activity
GO_Molecular_Function_2018		J	GPI anchor binding (GO:0034235)	1/8	0.013917	0.0384763	0.0171202	0.0473323	-3	13	DPEP1	GPI anchor binding
GO_Molecular_Function_2018		J	metallocarboxypeptidase activity (GO:0004181)	2/29	0.00117259	0.0061235	0.00157599	0.00823015	-2	13	AEBP1;CPZ	metallocarboxypeptidase activity
KEGG_2019_Human		C	Breast cancer	1/147	0.124399	0.160631	0.189825	0.243656	-6	13	WNT9B	Breast cancer
GO_Biological_Process_2018		A	positive regulation of insulin-like growth factor receptor signaling pathway (GO:0043568)	1/8	0.00876772	0.060267	0.0117735	0.0769717	-3	12	IGF1	positive regulation of insulin-like growth factor receptor signaling pathway
GO_Biological_Process_2018		A	venous blood vessel morphogenesis (GO:0048845)	1/7	0.00767578	0.060267	0.0104718	0.0769717	-2	12	VEGFA	venous blood vessel morphogenesis
GO_Biological_Process_2018		A	positive regulation of calcium ion import (GO:0090280)	1/11	0.0120367	0.060267	0.0156687	0.0769717	-3	12	CCL3	positive regulation of calcium ion import
GO_Biological_Process_2018		A	positive regulation of cell migration (GO:0030335)	3/222	0.00177798	0.060267	0.00300105	0.0769717	-2	12	CCL3;IGF1;VEGFA	positive regulation of cell migration
GO_Biological_Process_2018		A	regulation of neuroblast proliferation (GO:1902692)	1/11	0.0120367	0.060267	0.0156687	0.0769717	-3	12	VEGFA	regulation of neuroblast proliferation
GO_Biological_Process_2018		A	camera-type eye morphogenesis (GO:0048593)	1/12	0.013124	0.060267	0.0169639	0.0769717	-3	12	VEGFA	camera-type eye morphogenesis
GO_Biological_Process_2018		A	insulin-like growth factor receptor signaling pathway (GO:0048009)	1/11	0.0120367	0.060267	0.0156687	0.0769717	-3	12	IGF1	insulin-like growth factor receptor signaling pathway
GO_Biological_Process_2018		A	regulation of natural killer cell chemotaxis (GO:2000501)	1/8	0.00876772	0.060267	0.0117735	0.0769717	-2	12	CCL3	regulation of natural killer cell chemotaxis
GO_Biological_Process_2018		A	T cell chemotaxis (GO:0010818)	1/11	0.0120367	0.060267	0.0156687	0.0769717	-3	12	CCL3	T cell chemotaxis
GO_Biological_Process_2018		A	photoreceptor cell development (GO:0042461)	1/12	0.013124	0.060267	0.0169639	0.0769717	-3	12	VEGFA	photoreceptor cell development
GO_Biological_Process_2018		A	regulation of sensory perception of pain (GO:0051930)	1/10	0.0109482	0.060267	0.0143719	0.0769717	-3	12	CCL3	regulation of sensory perception of pain
GO_Biological_Process_2018		A	release of sequestered calcium ion into cytosol by endoplasmic reticulum (GO:1903514)	1/8	0.00876772	0.060267	0.0117735	0.0769717	-2	12	CCL3	release of sequestered calcium ion into cytosol by endoplasmic reticulum
GO_Biological_Process_2018		A	regulation of protein kinase C signaling (GO:0090036)	1/12	0.013124	0.060267	0.0169639	0.0769717	-3	12	VEGFA	regulation of protein kinase C signaling
GO_Biological_Process_2018		B	glucosamine-containing compound metabolic process (GO:1901071)	1/14	0.00975869	0.0593028	0.0113682	0.0690838	-3	12	MGAT3	glucosamine-containing compound metabolic process
GO_Biological_Process_2018		B	positive regulation of G2/M transition of mitotic cell cycle (GO:0010971)	1/17	0.0118383	0.0638657	0.0136277	0.0732907	-3	12	STOX1	positive regulation of G2/M transition of mitotic cell cycle
GO_Biological_Process_2018		B	semaphorin-plexin signaling pathway involved in neuron projection guidance (GO:1902285)	1/14	0.00975869	0.0593028	0.0113682	0.0690838	-3	12	PLXNA4	semaphorin-plexin signaling pathway involved in neuron projection guidance
GO_Biological_Process_2018		B	regulation of receptor binding (GO:1900120)	1/9	0.00628364	0.0593028	0.00759193	0.0690838	-2	12	PTPRF	regulation of receptor binding
GO_Biological_Process_2018		C	complement activation, lectin pathway (GO:0001867)	1/11	0.00985802	0.0544637	0.0123923	0.0669122	-3	12	FCN3	complement activation, lectin pathway
GO_Biological_Process_2018		C	response to glucose (GO:0009749)	2/48	0.000842055	0.0474919	0.00119748	0.0669122	-2	12	ADIPOQ;LPL	response to glucose
GO_Biological_Process_2018		C	regulation of chemokine secretion (GO:0090196)	1/9	0.00807251	0.0544637	0.0103369	0.0669122	-3	12	LPL	regulation of chemokine secretion
GO_Biological_Process_2018		C	regulation of glycogen (starch) synthase activity (GO:2000465)	1/8	0.00717861	0.0544637	0.00930771	0.0669122	-2	12	ADIPOQ	regulation of glycogen (starch) synthase activity
GO_Biological_Process_2018		C	regulation of cholesterol storage (GO:0010885)	1/13	0.0116405	0.0544637	0.0144437	0.0669122	-3	12	LPL	regulation of cholesterol storage
GO_Biological_Process_2018		C	chylomicron remodeling (GO:0034371)	1/10	0.00896565	0.0544637	0.0113651	0.0669122	-3	12	LPL	chylomicron remodeling
GO_Biological_Process_2018		C	negative regulation of RNA biosynthetic process (GO:1902679)	1/13	0.0116405	0.0544637	0.0144437	0.0669122	-3	12	FCN3	negative regulation of RNA biosynthetic process
GO_Biological_Process_2018		C	regulation of granulocyte differentiation (GO:0030852)	1/11	0.00985802	0.0544637	0.0123923	0.0669122	-3	12	ADIPOQ	regulation of granulocyte differentiation
GO_Biological_Process_2018		C	carnitine shuttle (GO:0006853)	1/12	0.0107496	0.0544637	0.0134185	0.0669122	-3	12	ACACB	carnitine shuttle
GO_Biological_Process_2018		C	fatty acid transmembrane transport (GO:1902001)	1/12	0.0107496	0.0544637	0.0134185	0.0669122	-3	12	ACACB	fatty acid transmembrane transport
GO_Biological_Process_2018		C	regulation of monocyte chemotactic protein-1 production (GO:0071637)	1/8	0.00717861	0.0544637	0.00930771	0.0669122	-2	12	ADIPOQ	regulation of monocyte chemotactic protein-1 production
GO_Biological_Process_2018		C	negative regulation of reproductive process (GO:2000242)	1/11	0.00985802	0.0544637	0.0123923	0.0669122	-3	12	ACVR1C	negative regulation of reproductive process
GO_Biological_Process_2018		D	N-glycan processing (GO:0006491)	1/18	0.00538854	0.0113701	0.00525441	0.0109819	-2	12	EDEM2	N-glycan processing
GO_Biological_Process_2018		D	myotube differentiation (GO:0014902)	1/16	0.00479101	0.0113701	0.00470229	0.0109819	-2	12	ADAM12	myotube differentiation
GO_Biological_Process_2018		D	regulation of retrograde protein transport, ER to cytosol (GO:1904152)	1/13	0.00389415	0.0113701	0.00387369	0.0109819	-2	12	EDEM2	regulation of retrograde protein transport, ER to cytosol
GO_Biological_Process_2018		F	negative regulation of glucose transport (GO:0010829)	1/11	0.00658188	0.044506	0.00745544	0.050413	-2	12	LEP	negative regulation of glucose transport
GO_Biological_Process_2018		F	regulation of leukocyte mediated cytotoxicity (GO:0001910)	1/10	0.00598517	0.044506	0.00683605	0.050413	-2	12	LEP	regulation of leukocyte mediated cytotoxicity
GO_Biological_Process_2018		F	intestinal absorption (GO:0050892)	1/14	0.00837003	0.0457132	0.00931156	0.0508555	-3	12	LEP	intestinal absorption
GO_Biological_Process_2018		F	regulation of bone remodeling (GO:0046850)	1/13	0.00777431	0.0457132	0.0086932	0.0508555	-3	12	LEP	regulation of bone remodeling
GO_Biological_Process_2018		F	positive regulation of STAT cascade (GO:1904894)	1/20	0.0119375	0.0498566	0.0130146	0.0543549	-3	12	LEP	positive regulation of STAT cascade
GO_Biological_Process_2018		G	low-density lipoprotein particle remodeling (GO:0034374)	1/12	0.00837003	0.0565981	0.0116406	0.0767837	-3	12	PLA2G7	low-density lipoprotein particle remodeling
GO_Biological_Process_2018		G	pantothenate metabolic process (GO:0015939)	1/9	0.00628364	0.0565981	0.00896546	0.0767837	-2	12	VNN1	pantothenate metabolic process
GO_Biological_Process_2018		G	calcitonin family receptor signaling pathway (GO:0097646)	1/8	0.00558727	0.0565981	0.00807226	0.0767837	-2	12	CALCR	calcitonin family receptor signaling pathway
GO_Biological_Process_2018		H	response to tumor necrosis factor (GO:0034612)	3/98	8.82499e-05	0.00196226	0.000141936	0.00315598	-1	12	CCL5;XCL1;CCL19	response to tumor necrosis factor
GO_Biological_Process_2018		H	positive regulation of transforming growth factor beta production (GO:0071636)	1/9	0.00807251	0.0315791	0.0103369	0.0403231	-3	12	XCL1	positive regulation of transforming growth factor beta production
GO_Biological_Process_2018		H	T cell chemotaxis (GO:0010818)	1/11	0.00985802	0.0315791	0.0123923	0.0403231	-3	12	CXCL9	T cell chemotaxis
GO_Biological_Process_2018		H	positive regulation of lymphocyte apoptotic process (GO:0070230)	1/8	0.00717861	0.0315791	0.00930771	0.0403231	-2	12	CCL5	positive regulation of lymphocyte apoptotic process
GO_Biological_Process_2018		H	response to vitamin (GO:0033273)	1/10	0.00896565	0.0315791	0.0113651	0.0403231	-3	12	SPP1	response to vitamin
GO_Biological_Process_2018		H	positive regulation of plasma membrane bounded cell projection assembly (GO:0120034)	2/70	0.0017818	0.0137453	0.00246584	0.0190222	-2	12	CCL19;WNT1	positive regulation of plasma membrane bounded cell projection assembly
GO_Biological_Process_2018		H	positive regulation of ERK1 and ERK2 cascade (GO:0070374)	3/202	0.000740626	0.00666563	0.0011293	0.0101637	-2	12	CCL5;XCL1;CCL19	positive regulation of ERK1 and ERK2 cascade
GO_Biological_Process_2018		H	complement activation, lectin pathway (GO:0001867)	1/11	0.00985802	0.0315791	0.0123923	0.0403231	-3	12	COLEC11	complement activation, lectin pathway
GO_Biological_Process_2018		H	regulation of T cell proliferation (GO:0042129)	2/63	0.00144632	0.011885	0.00201507	0.0165955	-2	12	CCL5;CCL19	regulation of T cell proliferation
GO_Biological_Process_2018		H	regulation of dendritic cell antigen processing and presentation (GO:0002604)	1/9	0.00807251	0.0315791	0.0103369	0.0403231	-2	12	CCL19	regulation of dendritic cell antigen processing and presentation
GO_Biological_Process_2018		H	regulation of homotypic cell-cell adhesion (GO:0034110)	1/10	0.00896565	0.0315791	0.0113651	0.0403231	-2	12	CCL5	regulation of homotypic cell-cell adhesion
GO_Biological_Process_2018		H	positive regulation of bone remodeling (GO:0046852)	1/11	0.00985802	0.0315791	0.0123923	0.0403231	-2	12	SPP1	positive regulation of bone remodeling
GO_Biological_Process_2018		H	positive regulation of T cell apoptotic process (GO:0070234)	1/11	0.00985802	0.0315791	0.0123923	0.0403231	-2	12	CCL5	positive regulation of T cell apoptotic process
GO_Biological_Process_2018		H	positive regulation of lamellipodium assembly (GO:0010592)	1/14	0.0125306	0.032666	0.0154679	0.0403231	-3	12	WNT1	positive regulation of lamellipodium assembly
GO_Biological_Process_2018		I	positive regulation of protein phosphorylation (GO:0001934)	5/413	0.00133018	0.0298341	0.00179806	0.0394328	-2	12	SFRP2;IFNG;GDF15;TREM2;GDF6	positive regulation of protein phosphorylation
GO_Biological_Process_2018		I	positive regulation of purine nucleotide metabolic process (GO:1900544)	2/15	0.000402832	0.0172485	0.000592608	0.0253744	-2	12	CXCL10;CXCL11	positive regulation of purine nucleotide metabolic process
GO_Biological_Process_2018		I	positive regulation of protein import into nucleus, translocation (GO:0033160)	1/7	0.0139184	0.07338	0.017022	0.0883355	-3	12	IFNG	positive regulation of protein import into nucleus, translocation
GO_Biological_Process_2018		I	positive regulation of release of sequestered calcium ion into cytosol (GO:0051281)	2/32	0.00186244	0.030851	0.00238969	0.0394328	-2	12	CXCL10;CXCL11	positive regulation of release of sequestered calcium ion into cytosol
GO_Biological_Process_2018		I	riboflavin metabolic process (GO:0006771)	1/8	0.0158912	0.07338	0.01913	0.0883355	-3	12	ACP5	riboflavin metabolic process
GO_Biological_Process_2018		I	positive regulation of osteoblast proliferation (GO:0033690)	1/7	0.0139184	0.07338	0.017022	0.0883355	-3	12	TMEM119	positive regulation of osteoblast proliferation
GO_Biological_Process_2018		I	regulation of interleukin-23 production (GO:0032667)	1/8	0.0158912	0.07338	0.01913	0.0883355	-3	12	IFNG	regulation of interleukin-23 production
GO_Biological_Process_2018		I	leukotriene D4 biosynthetic process (GO:1901750)	1/11	0.0217867	0.0778489	0.0254276	0.0909331	-3	12	GGT1	leukotriene D4 biosynthetic process
GO_Biological_Process_2018		I	Wnt signaling pathway (GO:0016055)	4/110	6.79597e-05	0.00936396	9.77208e-05	0.0153422	-1	12	WNT6;SFRP2;FRZB;WNT16	Wnt signaling pathway
GO_Biological_Process_2018		I	regulation of vitamin D biosynthetic process (GO:0060556)	1/8	0.0158912	0.07338	0.01913	0.0883355	-3	12	IFNG	regulation of vitamin D biosynthetic process
GO_Biological_Process_2018		J	endothelial cell migration (GO:0043542)	2/36	0.00180561	0.0888574	0.00279147	0.115754	-2	12	FAP;SCG2	endothelial cell migration
GO_Biological_Process_2018		J	norepinephrine metabolic process (GO:0042415)	1/9	0.0156433	0.0888574	0.0205564	0.115754	-3	12	DBH	norepinephrine metabolic process
GO_Biological_Process_2018		J	regulation of protein processing (GO:0070613)	3/129	0.00147552	0.0888574	0.00251953	0.115754	-2	12	CCBE1;C1S;C2	regulation of protein processing
GO_Biological_Process_2018		J	proteolysis (GO:0006508)	4/292	0.00163166	0.0888574	0.00309662	0.115754	-2	12	FAP;HTRA4;AEBP1;CPZ	proteolysis
GO_Biological_Process_2018		J	heterocycle catabolic process (GO:0046700)	1/7	0.0121877	0.0888574	0.0164781	0.115754	-3	12	DPEP1	heterocycle catabolic process
GO_Biological_Process_2018		J	tooth mineralization (GO:0034505)	1/8	0.013917	0.0888574	0.0185193	0.115754	-3	12	COL1A1	tooth mineralization
GO_Biological_Process_2018		J	positive regulation of apoptotic cell clearance (GO:2000427)	1/8	0.013917	0.0888574	0.0185193	0.115754	-3	12	C2	positive regulation of apoptotic cell clearance
GO_Biological_Process_2018		K	positive regulation of hemostasis (GO:1900048)	1/10	0.00846946	0.0565791	0.0106118	0.0698098	-3	12	F12	positive regulation of hemostasis
GO_Biological_Process_2018		K	response to misfolded protein (GO:0051788)	1/8	0.00678099	0.0565791	0.0086902	0.0698098	-2	12	F12	response to misfolded protein
GO_Biological_Process_2018		K	mammary gland epithelium development (GO:0061180)	1/14	0.0118383	0.0595734	0.0144447	0.0726892	-3	12	WNT3	mammary gland epithelium development
GO_Biological_Process_2018		K	regulation of integrin activation (GO:0033623)	1/10	0.00846946	0.0565791	0.0106118	0.0698098	-3	12	CXCL13	regulation of integrin activation
GO_Biological_Process_2018		K	protein maturation (GO:0051604)	2/84	0.00227543	0.0565791	0.00304256	0.0698098	-2	12	F12;CPXM1	protein maturation
GO_Biological_Process_2018		K	L-phenylalanine metabolic process (GO:0006558)	1/12	0.0101552	0.0565791	0.01253	0.0698098	-3	12	IL4I1	L-phenylalanine metabolic process
GO_Biological_Process_2018		K	L-phenylalanine catabolic process (GO:0006559)	1/12	0.0101552	0.0565791	0.01253	0.0698098	-3	12	IL4I1	L-phenylalanine catabolic process
GO_Biological_Process_2018		K	regulation of T cell chemotaxis (GO:0010819)	1/11	0.00931268	0.0565791	0.0115713	0.0698098	-3	12	CXCL13	regulation of T cell chemotaxis
GO_Cellular_Component_2018		I	vacuolar lumen (GO:0005775)	3/162	0.00413731	0.0220656	0.000523668	0.0027929	-2	12	LUM;CTSK;DCN	vacuolar lumen
GO_Molecular_Function_2018		A	platelet-derived growth factor receptor binding (GO:0005161)	1/14	0.0152953	0.0438466	0.0155868	0.0446394	-3	12	VEGFA	platelet-derived growth factor receptor binding
GO_Molecular_Function_2018		A	calcium-dependent protein serine/threonine kinase activity (GO:0009931)	1/12	0.013124	0.0403095	0.0135215	0.0415303	-3	12	CCL3	calcium-dependent protein serine/threonine kinase activity
GO_Molecular_Function_2018		A	interleukin-1 binding (GO:0019966)	1/7	0.00767578	0.0392309	0.00834089	0.0410372	-2	12	IL1RN	interleukin-1 binding
GO_Molecular_Function_2018		A	signal recognition particle binding (GO:0005047)	1/9	0.00985851	0.0392309	0.0104161	0.0410372	-3	12	TF	signal recognition particle binding
GO_Molecular_Function_2018		A	natural killer cell lectin-like receptor binding (GO:0046703)	1/10	0.0109482	0.0392309	0.0114522	0.0410372	-3	12	ULBP3	natural killer cell lectin-like receptor binding
GO_Molecular_Function_2018		C	peptide transmembrane transporter activity (GO:1904680)	1/15	0.0134199	0.0497336	0.0152444	0.0560783	-3	12	AZGP1	peptide transmembrane transporter activity
GO_Molecular_Function_2018		C	neuropeptide receptor binding (GO:0071855)	1/12	0.0107496	0.0483734	0.0124023	0.0558102	-3	12	UCN2	neuropeptide receptor binding
GO_Molecular_Function_2018		E	retinol dehydrogenase activity (GO:0004745)	1/18	0.00538854	0.0226092	0.00661442	0.0274344	-2	12	RDH12	retinol dehydrogenase activity
GO_Molecular_Function_2018		G	endodeoxyribonuclease activity, producing 3'-phosphomonoesters (GO:0016889)	1/12	0.00837003	0.0385021	0.0112817	0.0518957	-2	12	DNASE2B	endodeoxyribonuclease activity, producing 3'-phosphomonoesters
GO_Molecular_Function_2018		H	MHC class II receptor activity (GO:0032395)	1/11	0.00985802	0.0238236	0.0135203	0.0326741	-3	12	HLA-DQB2	MHC class II receptor activity
GO_Molecular_Function_2018		H	serine-type peptidase activity (GO:0008236)	3/221	0.000960806	0.00348292	0.00181764	0.00658896	-2	12	GZMK;COLEC11;KLKB1	serine-type peptidase activity
GO_Molecular_Function_2018		H	frizzled binding (GO:0005109)	2/38	0.000527596	0.00218575	0.000902458	0.00373875	-2	12	WNT10B;WNT1	frizzled binding
GO_Molecular_Function_2018		J	dipeptidyl-peptidase activity (GO:0008239)	1/9	0.0156433	0.0408464	0.0190051	0.0496244	-3	12	FAP	dipeptidyl-peptidase activity
GO_Molecular_Function_2018		J	carboxypeptidase activity (GO:0004180)	2/40	0.00222573	0.0104609	0.00288115	0.0135414	-2	12	AEBP1;CPZ	carboxypeptidase activity
GO_Molecular_Function_2018		K	transmembrane-ephrin receptor activity (GO:0005005)	1/18	0.0151964	0.0637498	0.0180791	0.0748289	-3	12	EPHA7	transmembrane-ephrin receptor activity
KEGG_2019_Human		A	Oocyte meiosis	1/125	0.128905	0.16885	0.229117	0.299119	-6	12	IGF1	Oocyte meiosis
KEGG_2019_Human		A	Proteoglycans in cancer	2/201	0.0203437	0.14437	0.0634176	0.276218	-3	12	IGF1;VEGFA	Proteoglycans in cancer
KEGG_2019_Human		C	Longevity regulating pathway	1/102	0.0879625	0.156245	0.135906	0.240968	-5	12	ADIPOQ	Longevity regulating pathway
KEGG_2019_Human		I	Hepatocellular carcinoma	3/168	0.00457937	0.0349697	0.00769124	0.0587331	-2	12	WNT6;CDKN2A;WNT16	Hepatocellular carcinoma
KEGG_2019_Human		J	AGE-RAGE signaling pathway in diabetic complications	1/100	0.161037	0.233694	0.166601	0.241689	-6	12	COL1A1	AGE-RAGE signaling pathway in diabetic complications
KEGG_2019_Human		K	Melanogenesis	1/101	0.0824994	0.170499	0.099871	0.2064	-5	12	WNT3	Melanogenesis
GO_Biological_Process_2018		A	positive regulation of vascular endothelial growth factor receptor signaling pathway (GO:0030949)	1/13	0.0142102	0.060267	0.0182574	0.0769717	-3	11	VEGFA	positive regulation of vascular endothelial growth factor receptor signaling pathway
GO_Biological_Process_2018		A	cellular response to iron ion (GO:0071281)	1/7	0.00767578	0.060267	0.0104718	0.0769717	-2	11	TF	cellular response to iron ion
GO_Biological_Process_2018		A	neuronal ion channel clustering (GO:0045161)	1/10	0.0109482	0.060267	0.0143719	0.0769717	-3	11	NRCAM	neuronal ion channel clustering
GO_Biological_Process_2018		A	neuron migration (GO:0001764)	2/41	0.00092285	0.0437138	0.00143196	0.0740492	-2	11	NRCAM;VEGFA	neuron migration
GO_Biological_Process_2018		A	positive regulation of cardiac muscle cell differentiation (GO:2000727)	1/11	0.0120367	0.060267	0.0156687	0.0769717	-3	11	IGF1	positive regulation of cardiac muscle cell differentiation
GO_Biological_Process_2018		A	regulation of macromolecule biosynthetic process (GO:0010556)	1/14	0.0152953	0.060267	0.0195494	0.0769717	-3	11	PRG2	regulation of macromolecule biosynthetic process
GO_Biological_Process_2018		A	positive regulation of mesenchymal cell proliferation (GO:0002053)	1/12	0.013124	0.060267	0.0169639	0.0769717	-3	11	VEGFA	positive regulation of mesenchymal cell proliferation
GO_Biological_Process_2018		A	positive regulation of branching involved in ureteric bud morphogenesis (GO:0090190)	1/13	0.0142102	0.060267	0.0182574	0.0769717	-3	11	VEGFA	positive regulation of branching involved in ureteric bud morphogenesis
GO_Biological_Process_2018		A	neuron projection fasciculation (GO:0106030)	1/11	0.0120367	0.060267	0.0156687	0.0769717	-2	11	NRCAM	neuron projection fasciculation
GO_Biological_Process_2018		A	eye photoreceptor cell development (GO:0042462)	1/13	0.0142102	0.060267	0.0182574	0.0769717	-3	11	VEGFA	eye photoreceptor cell development
GO_Biological_Process_2018		A	regulation of glycoprotein biosynthetic process (GO:0010559)	1/10	0.0109482	0.060267	0.0143719	0.0769717	-2	11	IGF1	regulation of glycoprotein biosynthetic process
GO_Biological_Process_2018		A	regulation of leukocyte migration (GO:0002685)	1/14	0.0152953	0.060267	0.0195494	0.0769717	-3	11	VEGFA	regulation of leukocyte migration
GO_Biological_Process_2018		A	cell-substrate junction assembly (GO:0007044)	1/12	0.013124	0.060267	0.0169639	0.0769717	-3	11	LAMB3	cell-substrate junction assembly
GO_Biological_Process_2018		A	cardiac muscle fiber development (GO:0048739)	1/13	0.0142102	0.060267	0.0182574	0.0769717	-3	11	VEGFA	cardiac muscle fiber development
GO_Biological_Process_2018		A	macrophage migration (GO:1905517)	1/11	0.0120367	0.060267	0.0156687	0.0769717	-2	11	CCL3	macrophage migration
GO_Biological_Process_2018		A	regulation of extent of cell growth (GO:0061387)	1/7	0.00767578	0.060267	0.0104718	0.0769717	-2	11	NRCAM	regulation of extent of cell growth
GO_Biological_Process_2018		A	negative regulation of heterotypic cell-cell adhesion (GO:0034115)	1/10	0.0109482	0.060267	0.0143719	0.0769717	-2	11	IL1RN	negative regulation of heterotypic cell-cell adhesion
GO_Biological_Process_2018		A	regulation of cell-cell adhesion involved in gastrulation (GO:0070587)	1/10	0.0109482	0.060267	0.0143719	0.0769717	-2	11	IL1RN	regulation of cell-cell adhesion involved in gastrulation
GO_Biological_Process_2018		A	regulation of mesenchymal cell proliferation (GO:0010464)	1/13	0.0142102	0.060267	0.0182574	0.0769717	-3	11	VEGFA	regulation of mesenchymal cell proliferation
GO_Biological_Process_2018		A	negative regulation of bone mineralization (GO:0030502)	1/12	0.013124	0.060267	0.0169639	0.0769717	-2	11	CCL3	negative regulation of bone mineralization
GO_Biological_Process_2018		A	negative regulation of cell activation (GO:0050866)	1/11	0.0120367	0.060267	0.0156687	0.0769717	-2	11	C1QTNF1	negative regulation of cell activation
GO_Biological_Process_2018		A	monocyte differentiation (GO:0030224)	1/12	0.013124	0.060267	0.0169639	0.0769717	-2	11	VEGFA	monocyte differentiation
GO_Biological_Process_2018		A	positive regulation of histone deacetylation (GO:0031065)	1/12	0.013124	0.060267	0.0169639	0.0769717	-2	11	VEGFA	positive regulation of histone deacetylation
GO_Biological_Process_2018		A	positive regulation of vasculature development (GO:1904018)	2/105	0.00588888	0.060267	0.00855399	0.0769717	-2	11	ANGPTL4;VEGFA	positive regulation of vasculature development
GO_Biological_Process_2018		B	leukotriene D4 metabolic process (GO:1901748)	1/11	0.00767502	0.0593028	0.00910401	0.0690838	-2	11	GGT5	leukotriene D4 metabolic process
GO_Biological_Process_2018		B	regulation of axon guidance (GO:1902667)	1/14	0.00975869	0.0593028	0.0113682	0.0690838	-2	11	PLXNA4	regulation of axon guidance
GO_Biological_Process_2018		B	regulation of response to stress (GO:0080134)	1/11	0.00767502	0.0593028	0.00910401	0.0690838	-2	11	STOX1	regulation of response to stress
GO_Biological_Process_2018		B	negative regulation by host of viral transcription (GO:0043922)	1/13	0.00906459	0.0593028	0.010614	0.0690838	-2	11	CCL4	negative regulation by host of viral transcription
GO_Biological_Process_2018		C	biotin metabolic process (GO:0006768)	1/12	0.0107496	0.0544637	0.0134185	0.0669122	-3	11	ACACB	biotin metabolic process
GO_Biological_Process_2018		C	regulation of stem cell population maintenance (GO:2000036)	1/12	0.0107496	0.0544637	0.0134185	0.0669122	-3	11	WNT9B	regulation of stem cell population maintenance
GO_Biological_Process_2018		C	midbrain dopaminergic neuron differentiation (GO:1904948)	1/12	0.0107496	0.0544637	0.0134185	0.0669122	-3	11	WNT9B	midbrain dopaminergic neuron differentiation
GO_Biological_Process_2018		C	regulation of receptor binding (GO:1900120)	1/9	0.00807251	0.0544637	0.0103369	0.0669122	-2	11	ADIPOQ	regulation of receptor binding
GO_Biological_Process_2018		C	negative regulation of heterotypic cell-cell adhesion (GO:0034115)	1/10	0.00896565	0.0544637	0.0113651	0.0669122	-2	11	ADIPOQ	negative regulation of heterotypic cell-cell adhesion
GO_Biological_Process_2018		C	regulation of cell-cell adhesion involved in gastrulation (GO:0070587)	1/10	0.00896565	0.0544637	0.0113651	0.0669122	-2	11	ADIPOQ	regulation of cell-cell adhesion involved in gastrulation
GO_Biological_Process_2018		C	acetyl-CoA metabolic process (GO:0006084)	1/15	0.0134199	0.0548467	0.0164911	0.0669122	-3	11	ACACB	acetyl-CoA metabolic process
GO_Biological_Process_2018		C	retinol metabolic process (GO:0042572)	1/13	0.0116405	0.0544637	0.0144437	0.0669122	-2	11	RETSAT	retinol metabolic process
GO_Biological_Process_2018		C	negative regulation of oxidoreductase activity (GO:0051354)	1/13	0.0116405	0.0544637	0.0144437	0.0669122	-2	11	AOC3	negative regulation of oxidoreductase activity
GO_Biological_Process_2018		C	negative regulation of macrophage derived foam cell differentiation (GO:0010745)	1/14	0.0125306	0.0544637	0.0154679	0.0669122	-2	11	ADIPOQ	negative regulation of macrophage derived foam cell differentiation
GO_Biological_Process_2018		C	regulation of sequestering of triglyceride (GO:0010889)	1/13	0.0116405	0.0544637	0.0144437	0.0669122	-2	11	LPL	regulation of sequestering of triglyceride
GO_Biological_Process_2018		C	positive regulation of chemokine production (GO:0032722)	2/35	0.000447257	0.0420422	0.00065613	0.0616762	-1	11	ADIPOQ;LPL	positive regulation of chemokine production
GO_Biological_Process_2018		E	regulation of extracellular matrix disassembly (GO:0010715)	1/15	0.00449213	0.0485945	0.00442615	0.0476947	-2	11	FGFR4	regulation of extracellular matrix disassembly
GO_Biological_Process_2018		F	epidermis development (GO:0008544)	2/82	0.00106714	0.044506	0.00117198	0.050413	-2	11	COL7A1;CTGF	epidermis development
GO_Biological_Process_2018		G	amylin receptor signaling pathway (GO:0097647)	1/7	0.00489045	0.0565981	0.00717832	0.0767837	-2	11	CALCR	amylin receptor signaling pathway
GO_Biological_Process_2018		G	cytoplasmic mRNA processing body assembly (GO:0033962)	1/12	0.00837003	0.0565981	0.0116406	0.0767837	-2	11	PATL2	cytoplasmic mRNA processing body assembly
GO_Biological_Process_2018		G	glycerolipid metabolic process (GO:0046486)	1/11	0.00767502	0.0565981	0.0107496	0.0767837	-2	11	PLA2G15	glycerolipid metabolic process
GO_Biological_Process_2018		H	negative regulation of lymphocyte apoptotic process (GO:0070229)	1/10	0.00896565	0.0315791	0.0113651	0.0403231	-2	11	CCL5	negative regulation of lymphocyte apoptotic process
GO_Biological_Process_2018		H	cytokine-mediated signaling pathway (GO:0019221)	5/634	0.000191524	0.0034279	0.000345495	0.00524179	-1	11	CXCL9;CCL5;XCL1;CCL19;HLA-DQB2	cytokine-mediated signaling pathway
GO_Biological_Process_2018		H	response to vitamin D (GO:0033280)	1/9	0.00807251	0.0315791	0.0103369	0.0403231	-2	11	SPP1	response to vitamin D
GO_Biological_Process_2018		H	regulation of transforming growth factor beta production (GO:0071634)	1/11	0.00985802	0.0315791	0.0123923	0.0403231	-2	11	XCL1	regulation of transforming growth factor beta production
GO_Biological_Process_2018		H	positive regulation of type 2 immune response (GO:0002830)	1/11	0.00985802	0.0315791	0.0123923	0.0403231	-2	11	XCL1	positive regulation of type 2 immune response
GO_Biological_Process_2018		H	macrophage migration (GO:1905517)	1/11	0.00985802	0.0315791	0.0123923	0.0403231	-2	11	CCL5	macrophage migration
GO_Biological_Process_2018		H	regulation of glycoprotein biosynthetic process (GO:0010559)	1/10	0.00896565	0.0315791	0.0113651	0.0403231	-2	11	CCL19	regulation of glycoprotein biosynthetic process
GO_Biological_Process_2018		H	regulation of lymphocyte activation (GO:0051249)	1/14	0.0125306	0.032666	0.0154679	0.0403231	-3	11	CCL5	regulation of lymphocyte activation
GO_Biological_Process_2018		H	midbrain dopaminergic neuron differentiation (GO:1904948)	1/12	0.0107496	0.032666	0.0134185	0.0403231	-2	11	WNT1	midbrain dopaminergic neuron differentiation
GO_Biological_Process_2018		H	response to nitric oxide (GO:0071731)	1/12	0.0107496	0.032666	0.0134185	0.0403231	-2	11	CCL19	response to nitric oxide
GO_Biological_Process_2018		H	positive regulation of CD4-positive, alpha-beta T cell activation (GO:2000516)	1/8	0.00717861	0.0315791	0.00930771	0.0403231	-2	11	XCL1	positive regulation of CD4-positive, alpha-beta T cell activation
GO_Biological_Process_2018		H	cellular metal ion homeostasis (GO:0006875)	2/97	0.00338622	0.0220688	0.00460483	0.0300108	-2	11	CCL5;CCL19	cellular metal ion homeostasis
GO_Biological_Process_2018		H	negative regulation of oxidoreductase activity (GO:0051354)	1/13	0.0116405	0.032666	0.0144437	0.0403231	-2	11	GZMK	negative regulation of oxidoreductase activity
GO_Biological_Process_2018		I	hyperosmotic response (GO:0006972)	1/8	0.0158912	0.07338	0.01913	0.0883355	-3	11	EPO	hyperosmotic response
GO_Biological_Process_2018		I	positive regulation of cAMP metabolic process (GO:0030816)	2/27	0.00132633	0.0298341	0.001741	0.0394328	-2	11	CXCL10;CXCL11	positive regulation of cAMP metabolic process
GO_Biological_Process_2018		I	regulation of protein ADP-ribosylation (GO:0010835)	1/9	0.0178602	0.0737909	0.0212335	0.0885044	-3	11	IFNG	regulation of protein ADP-ribosylation
GO_Biological_Process_2018		I	regulation of cAMP-mediated signaling (GO:0043949)	2/19	0.000652729	0.0192147	0.000910183	0.0267935	-2	11	CXCL10;CXCL11	regulation of cAMP-mediated signaling
GO_Biological_Process_2018		I	negative regulation of glucose import (GO:0046325)	1/9	0.0178602	0.0737909	0.0212335	0.0885044	-3	11	MZB1	negative regulation of glucose import
GO_Biological_Process_2018		I	extracellular matrix organization (GO:0030198)	4/230	0.00112537	0.0294471	0.00149049	0.039001	-2	11	LUM;CTSK;LOXL1;DCN	extracellular matrix organization
GO_Biological_Process_2018		I	heterochromatin assembly (GO:0031507)	1/9	0.0178602	0.0737909	0.0212335	0.0885044	-3	11	CDKN2A	heterochromatin assembly
GO_Biological_Process_2018		I	positive regulation of calcium ion transport into cytosol (GO:0010524)	2/33	0.00198009	0.0310875	0.00253114	0.039739	-2	11	CXCL10;CXCL11	positive regulation of calcium ion transport into cytosol
GO_Biological_Process_2018		I	positive regulation of chondrocyte differentiation (GO:0032332)	1/12	0.0237442	0.080457	0.0275181	0.0932446	-3	11	GDF6	positive regulation of chondrocyte differentiation
GO_Biological_Process_2018		I	proteolysis (GO:0006508)	4/292	0.00269	0.0372644	0.00349807	0.0484585	-2	11	CTSK;ADAM33;GGT1;GZMH	proteolysis
GO_Biological_Process_2018		I	T cell mediated immunity (GO:0002456)	1/10	0.0198254	0.0759167	0.0233327	0.0899126	-3	11	CD8A	T cell mediated immunity
GO_Biological_Process_2018		J	biomineral tissue development (GO:0031214)	1/9	0.0156433	0.0888574	0.0205564	0.115754	-3	11	COL1A1	biomineral tissue development
GO_Biological_Process_2018		J	regulation of extracellular matrix organization (GO:1903053)	1/8	0.013917	0.0888574	0.0185193	0.115754	-3	11	FAP	regulation of extracellular matrix organization
GO_Biological_Process_2018		J	positive regulation of monocyte differentiation (GO:0045657)	1/9	0.0156433	0.0888574	0.0205564	0.115754	-3	11	IL34	positive regulation of monocyte differentiation
GO_Biological_Process_2018		J	regulation of immune effector process (GO:0002697)	2/115	0.0172335	0.0893958	0.0243529	0.115754	-3	11	C1S;C2	regulation of immune effector process
GO_Biological_Process_2018		J	venous blood vessel morphogenesis (GO:0048845)	1/7	0.0121877	0.0888574	0.0164781	0.115754	-3	11	CCBE1	venous blood vessel morphogenesis
GO_Biological_Process_2018		J	elastic fiber assembly (GO:0048251)	1/8	0.013917	0.0888574	0.0185193	0.115754	-3	11	MFAP4	elastic fiber assembly
GO_Biological_Process_2018		J	collagen metabolic process (GO:0032963)	1/13	0.0225193	0.0913764	0.028664	0.115754	-3	11	COL1A1	collagen metabolic process
GO_Biological_Process_2018		J	membrane lipid catabolic process (GO:0046466)	1/9	0.0156433	0.0888574	0.0205564	0.115754	-3	11	SMPDL3B	membrane lipid catabolic process
GO_Biological_Process_2018		J	regulation of apoptotic cell clearance (GO:2000425)	1/9	0.0156433	0.0888574	0.0205564	0.115754	-3	11	C2	regulation of apoptotic cell clearance
GO_Biological_Process_2018		J	positive regulation of macrophage differentiation (GO:0045651)	1/9	0.0156433	0.0888574	0.0205564	0.115754	-3	11	IL34	positive regulation of macrophage differentiation
GO_Biological_Process_2018		J	cellular response to UV-B (GO:0071493)	1/9	0.0156433	0.0888574	0.0205564	0.115754	-3	11	MFAP4	cellular response to UV-B
GO_Biological_Process_2018		K	positive regulation of T cell receptor signaling pathway (GO:0050862)	1/11	0.00931268	0.0565791	0.0115713	0.0698098	-2	11	KCNN4	positive regulation of T cell receptor signaling pathway
GO_Cellular_Component_2018		A	anchored component of plasma membrane (GO:0046658)	2/41	0.00092285	0.00715208	0.0015377	0.0119172	-2	11	TREH;ULBP3	anchored component of plasma membrane
GO_Cellular_Component_2018		E	GABA-A receptor complex (GO:1902711)	1/20	0.00598577	0.0119715	0.00484596	0.00969192	-2	11	GABRP	GABA-A receptor complex
GO_Cellular_Component_2018		H	T cell receptor complex (GO:0042101)	1/17	0.0151964	0.0890913	0.0124086	0.0578736	-3	11	CD3D	T cell receptor complex
GO_Molecular_Function_2018		A	hormone activity (GO:0005179)	2/84	0.00381263	0.0392309	0.00349214	0.0410372	-2	11	IGF1;NTS	hormone activity
GO_Molecular_Function_2018		B	transferase activity, transferring amino-acyl groups (GO:0016755)	1/17	0.0118383	0.0417416	0.017135	0.0598943	-3	11	GGT5	transferase activity, transferring amino-acyl groups
GO_Molecular_Function_2018		B	semaphorin receptor activity (GO:0017154)	1/12	0.00837003	0.0417416	0.0124023	0.0598943	-2	11	PLXNA4	semaphorin receptor activity
GO_Molecular_Function_2018		B	transmembrane receptor protein phosphatase activity (GO:0019198)	1/16	0.0111455	0.0417416	0.0161901	0.0598943	-2	11	PTPRF	transmembrane receptor protein phosphatase activity
GO_Molecular_Function_2018		B	transmembrane receptor protein tyrosine phosphatase activity (GO:0005001)	1/16	0.0111455	0.0417416	0.0161901	0.0598943	-2	11	PTPRF	transmembrane receptor protein tyrosine phosphatase activity
GO_Molecular_Function_2018		B	glycine binding (GO:0016594)	1/14	0.00975869	0.0417416	0.0142979	0.0598943	-2	11	GLRB	glycine binding
GO_Molecular_Function_2018		B	inhibitory extracellular ligand-gated ion channel activity (GO:0005237)	1/16	0.0111455	0.0417416	0.0161901	0.0598943	-2	11	GLRB	inhibitory extracellular ligand-gated ion channel activity
GO_Molecular_Function_2018		B	C-acyltransferase activity (GO:0016408)	1/13	0.00906459	0.0417416	0.0133505	0.0598943	-2	11	HADHB	C-acyltransferase activity
GO_Molecular_Function_2018		C	oxidoreductase activity, acting on the CH-NH2 group of donors, oxygen as acceptor (GO:0016641)	1/16	0.0143085	0.0497336	0.0161901	0.0560783	-3	11	AOC3	oxidoreductase activity, acting on the CH-NH2 group of donors, oxygen as acceptor
GO_Molecular_Function_2018		E	GABA receptor activity (GO:0016917)	1/22	0.0065827	0.0226092	0.00800274	0.0274344	-2	11	GABRP	GABA receptor activity
GO_Molecular_Function_2018		E	extracellular ligand-gated ion channel activity (GO:0005230)	1/53	0.015797	0.0284112	0.0187129	0.0334451	-3	11	GABRP	extracellular ligand-gated ion channel activity
GO_Molecular_Function_2018		E	GABA-A receptor activity (GO:0004890)	1/20	0.00598577	0.0226092	0.00730877	0.0274344	-2	11	GABRP	GABA-A receptor activity
GO_Molecular_Function_2018		G	peptidase activity, acting on L-amino acid peptides (GO:0070011)	2/186	0.00727365	0.0385021	0.0110306	0.0518957	-2	11	MMP7;ADAMTS6	peptidase activity, acting on L-amino acid peptides
GO_Molecular_Function_2018		G	carboxylic ester hydrolase activity (GO:0052689)	2/104	0.0023397	0.0179377	0.00362807	0.0278152	-2	11	PLA2G15;PLA2G7	carboxylic ester hydrolase activity
GO_Molecular_Function_2018		I	insulin-like growth factor II binding (GO:0031995)	1/8	0.0158912	0.0452899	0.0209656	0.0597519	-3	11	IGFBP6	insulin-like growth factor II binding
GO_Molecular_Function_2018		I	cytokine receptor binding (GO:0005126)	3/138	0.00263482	0.0250308	0.00426893	0.0405548	-2	11	GDF15;EPO;GDF6	cytokine receptor binding
GO_Molecular_Function_2018		J	dipeptidase activity (GO:0016805)	1/11	0.0190872	0.0448549	0.0227645	0.0534966	-3	11	DPEP1	dipeptidase activity
GO_Molecular_Function_2018		K	oxidoreductase activity, acting on the CH-NH2 group of donors, oxygen as acceptor (GO:0016641)	1/16	0.0135187	0.0637498	0.0161901	0.0748289	-3	11	IL4I1	oxidoreductase activity, acting on the CH-NH2 group of donors, oxygen as acceptor
GO_Molecular_Function_2018		K	ephrin receptor activity (GO:0005003)	1/18	0.0151964	0.0637498	0.0180791	0.0748289	-3	11	EPHA7	ephrin receptor activity
KEGG_2019_Human		A	AGE-RAGE signaling pathway in diabetic complications	1/100	0.104465	0.153804	0.187996	0.276218	-5	11	VEGFA	AGE-RAGE signaling pathway in diabetic complications
KEGG_2019_Human		H	Measles	1/138	0.117224	0.153856	0.179293	0.235322	-5	11	CD3D	Measles
KEGG_2019_Human		I	Glioma	1/75	0.139661	0.212082	0.169518	0.262012	-6	11	CDKN2A	Glioma
GO_Biological_Process_2018		A	regulation of peptidyl-tyrosine phosphorylation (GO:0050730)	2/86	0.00399215	0.060267	0.00586038	0.0769717	-2	10	IGF1;VEGFA	regulation of peptidyl-tyrosine phosphorylation
GO_Biological_Process_2018		A	induction of positive chemotaxis (GO:0050930)	1/11	0.0120367	0.060267	0.0156687	0.0769717	-2	10	VEGFA	induction of positive chemotaxis
GO_Biological_Process_2018		A	regulation of cytokine biosynthetic process (GO:0042035)	1/13	0.0142102	0.060267	0.0182574	0.0769717	-2	10	PRG2	regulation of cytokine biosynthetic process
GO_Biological_Process_2018		A	macrophage differentiation (GO:0030225)	1/12	0.013124	0.060267	0.0169639	0.0769717	-2	10	VEGFA	macrophage differentiation
GO_Biological_Process_2018		A	regulation of blood vessel endothelial cell proliferation involved in sprouting angiogenesis (GO:1903587)	1/12	0.013124	0.060267	0.0169639	0.0769717	-2	10	VEGFA	regulation of blood vessel endothelial cell proliferation involved in sprouting angiogenesis
GO_Biological_Process_2018		A	regulation of branching involved in ureteric bud morphogenesis (GO:0090189)	1/16	0.017462	0.060267	0.0221284	0.0769717	-2	10	VEGFA	regulation of branching involved in ureteric bud morphogenesis
GO_Biological_Process_2018		A	lactation (GO:0007595)	1/10	0.0109482	0.060267	0.0143719	0.0769717	-2	10	VEGFA	lactation
GO_Biological_Process_2018		A	eye photoreceptor cell differentiation (GO:0001754)	1/13	0.0142102	0.060267	0.0182574	0.0769717	-2	10	VEGFA	eye photoreceptor cell differentiation
GO_Biological_Process_2018		A	myotube cell development (GO:0014904)	1/15	0.0163792	0.060267	0.0208397	0.0769717	-2	10	IGF1	myotube cell development
GO_Biological_Process_2018		A	positive regulation of endothelial cell chemotaxis (GO:2001028)	1/14	0.0152953	0.060267	0.0195494	0.0769717	-2	10	VEGFA	positive regulation of endothelial cell chemotaxis
GO_Biological_Process_2018		A	regulation of protein import into nucleus, translocation (GO:0033158)	1/13	0.0142102	0.060267	0.0182574	0.0769717	-2	10	IGF1	regulation of protein import into nucleus, translocation
GO_Biological_Process_2018		A	response to sterol (GO:0036314)	1/12	0.013124	0.060267	0.0169639	0.0769717	-2	10	CCL3	response to sterol
GO_Biological_Process_2018		A	positive regulation of carbohydrate metabolic process (GO:0045913)	1/19	0.0207036	0.0610762	0.025985	0.0769717	-2	10	IGF1	positive regulation of carbohydrate metabolic process
GO_Biological_Process_2018		A	regulation of axon guidance (GO:1902667)	1/14	0.0152953	0.060267	0.0195494	0.0769717	-2	10	VEGFA	regulation of axon guidance
GO_Biological_Process_2018		A	iron ion homeostasis (GO:0055072)	2/64	0.0022344	0.060267	0.00334081	0.0769717	-2	10	TF;HAMP	iron ion homeostasis
GO_Biological_Process_2018		B	leukotriene biosynthetic process (GO:0019370)	1/19	0.0132225	0.0652859	0.0151314	0.0747114	-2	10	GGT5	leukotriene biosynthetic process
GO_Biological_Process_2018		B	positive regulation of lymphocyte migration (GO:2000403)	1/18	0.0125306	0.0638657	0.0143798	0.0732907	-2	10	CCL4	positive regulation of lymphocyte migration
GO_Biological_Process_2018		B	negative regulation of response to wounding (GO:1903035)	1/17	0.0118383	0.0638657	0.0136277	0.0732907	-2	10	RTN4RL1	negative regulation of response to wounding
GO_Biological_Process_2018		B	peptide catabolic process (GO:0043171)	1/26	0.0180528	0.0705022	0.0203781	0.0794721	-2	10	GGT5	peptide catabolic process
GO_Biological_Process_2018		B	semaphorin-plexin signaling pathway (GO:0071526)	1/30	0.0208032	0.0730422	0.0233647	0.0820361	-2	10	PLXNA4	semaphorin-plexin signaling pathway
GO_Biological_Process_2018		B	peptidyl-tyrosine dephosphorylation (GO:0035335)	1/26	0.0180528	0.0705022	0.0203781	0.0794721	-2	10	PTPRF	peptidyl-tyrosine dephosphorylation
GO_Biological_Process_2018		C	cellular response to low-density lipoprotein particle stimulus (GO:0071404)	1/14	0.0125306	0.0544637	0.0154679	0.0669122	-2	10	LPL	cellular response to low-density lipoprotein particle stimulus
GO_Biological_Process_2018		C	regulation of cAMP-dependent protein kinase activity (GO:2000479)	1/14	0.0125306	0.0544637	0.0154679	0.0669122	-2	10	ADIPOQ	regulation of cAMP-dependent protein kinase activity
GO_Biological_Process_2018		C	negative regulation of cellular biosynthetic process (GO:0031327)	2/48	0.000842055	0.0474919	0.00119748	0.0669122	-1	10	FCN3;ADIPOQ	negative regulation of cellular biosynthetic process
GO_Biological_Process_2018		C	negative regulation of gluconeogenesis (GO:0045721)	1/10	0.00896565	0.0544637	0.0113651	0.0669122	-2	10	ADIPOQ	negative regulation of gluconeogenesis
GO_Biological_Process_2018		C	negative regulation of viral entry into host cell (GO:0046597)	1/16	0.0143085	0.0552741	0.0175133	0.0669122	-2	10	FCN3	negative regulation of viral entry into host cell
GO_Biological_Process_2018		C	regulation of trophoblast cell migration (GO:1901163)	1/12	0.0107496	0.0544637	0.0134185	0.0669122	-2	10	ACVR1C	regulation of trophoblast cell migration
GO_Biological_Process_2018		C	intracellular lipid transport (GO:0032365)	1/16	0.0143085	0.0552741	0.0175133	0.0669122	-2	10	ACACB	intracellular lipid transport
GO_Biological_Process_2018		C	negative regulation of vascular smooth muscle cell proliferation (GO:1904706)	1/13	0.0116405	0.0544637	0.0144437	0.0669122	-2	10	ADIPOQ	negative regulation of vascular smooth muscle cell proliferation
GO_Biological_Process_2018		C	positive regulation of lipid storage (GO:0010884)	1/20	0.0178553	0.0553319	0.0215922	0.0669122	-2	10	LPL	positive regulation of lipid storage
GO_Biological_Process_2018		C	regulation of cellular carbohydrate metabolic process (GO:0010675)	1/14	0.0125306	0.0544637	0.0154679	0.0669122	-2	10	ADIPOQ	regulation of cellular carbohydrate metabolic process
GO_Biological_Process_2018		C	positive regulation of cholesterol efflux (GO:0010875)	1/14	0.0125306	0.0544637	0.0154679	0.0669122	-2	10	ADIPOQ	positive regulation of cholesterol efflux
GO_Biological_Process_2018		C	triglyceride-rich lipoprotein particle remodeling (GO:0034370)	1/14	0.0125306	0.0544637	0.0154679	0.0669122	-2	10	LPL	triglyceride-rich lipoprotein particle remodeling
GO_Biological_Process_2018		D	ether lipid metabolic process (GO:0046485)	1/10	0.00299663	0.0113701	0.00304456	0.0109819	-2	10	AGPS	ether lipid metabolic process
GO_Biological_Process_2018		E	primary alcohol metabolic process (GO:0034308)	1/20	0.00598577	0.0531237	0.0058063	0.0515309	-2	10	RDH12	primary alcohol metabolic process
GO_Biological_Process_2018		E	regulation of cellular biosynthetic process (GO:0031326)	1/30	0.00896743	0.0610599	0.0085623	0.057157	-2	10	FGFR4	regulation of cellular biosynthetic process
GO_Biological_Process_2018		F	regulation of natural killer cell proliferation (GO:0032817)	1/7	0.00419308	0.044506	0.0049758	0.050413	-2	10	LEP	regulation of natural killer cell proliferation
GO_Biological_Process_2018		F	placenta development (GO:0001890)	1/14	0.00837003	0.0457132	0.00931156	0.0508555	-2	10	LEP	placenta development
GO_Biological_Process_2018		F	regulation of natural killer cell mediated cytotoxicity (GO:0042269)	1/23	0.0137168	0.0512575	0.0148614	0.0555348	-2	10	LEP	regulation of natural killer cell mediated cytotoxicity
GO_Biological_Process_2018		F	regulation of tissue remodeling (GO:0034103)	1/18	0.0107496	0.0492403	0.0117816	0.0539673	-2	10	LEP	regulation of tissue remodeling
GO_Biological_Process_2018		G	response to corticosteroid (GO:0031960)	1/12	0.00837003	0.0565981	0.0116406	0.0767837	-2	10	CALCR	response to corticosteroid
GO_Biological_Process_2018		G	glycerophospholipid catabolic process (GO:0046475)	1/16	0.0111455	0.0565981	0.0151971	0.0767837	-2	10	PLA2G15	glycerophospholipid catabolic process
GO_Biological_Process_2018		G	regulation of cAMP metabolic process (GO:0030814)	1/14	0.00975869	0.0565981	0.0134203	0.0767837	-2	10	CALCR	regulation of cAMP metabolic process
GO_Biological_Process_2018		G	cellular amide metabolic process (GO:0043603)	2/63	0.00086724	0.0452539	0.00150603	0.0767837	-1	10	PLA2G15;VNN1	cellular amide metabolic process
GO_Biological_Process_2018		G	apoptotic DNA fragmentation (GO:0006309)	1/16	0.0111455	0.0565981	0.0151971	0.0767837	-2	10	DNASE2B	apoptotic DNA fragmentation
GO_Biological_Process_2018		H	regulation of macrophage chemotaxis (GO:0010758)	1/16	0.0143085	0.0342318	0.0175133	0.0418989	-2	10	CCL5	regulation of macrophage chemotaxis
GO_Biological_Process_2018		H	neutrophil activation (GO:0042119)	1/15	0.0134199	0.0342318	0.0164911	0.0418989	-2	10	CCL5	neutrophil activation
GO_Biological_Process_2018		H	regulation of T cell mediated cytotoxicity (GO:0001914)	1/16	0.0143085	0.0342318	0.0175133	0.0418989	-2	10	XCL1	regulation of T cell mediated cytotoxicity
GO_Biological_Process_2018		H	regulation of mononuclear cell migration (GO:0071675)	1/13	0.0116405	0.032666	0.0144437	0.0403231	-2	10	CCL5	regulation of mononuclear cell migration
GO_Biological_Process_2018		H	regulation of granulocyte chemotaxis (GO:0071622)	1/14	0.0125306	0.032666	0.0154679	0.0403231	-2	10	CCL5	regulation of granulocyte chemotaxis
GO_Biological_Process_2018		H	positive regulation of STAT cascade (GO:1904894)	1/20	0.0178553	0.0385675	0.0215922	0.0471784	-3	10	CCL5	positive regulation of STAT cascade
GO_Biological_Process_2018		H	regulation of T-helper 1 type immune response (GO:0002825)	1/10	0.00896565	0.0315791	0.0113651	0.0403231	-2	10	XCL1	regulation of T-helper 1 type immune response
GO_Biological_Process_2018		H	positive regulation of T-helper cell differentiation (GO:0045624)	1/12	0.0107496	0.032666	0.0134185	0.0403231	-2	10	CCL19	positive regulation of T-helper cell differentiation
GO_Biological_Process_2018		H	negative regulation of cell aging (GO:0090344)	1/16	0.0143085	0.0342318	0.0175133	0.0418989	-2	10	WNT1	negative regulation of cell aging
GO_Biological_Process_2018		H	regulation of T cell apoptotic process (GO:0070232)	1/11	0.00985802	0.0315791	0.0123923	0.0403231	-2	10	CCL5	regulation of T cell apoptotic process
GO_Biological_Process_2018		H	negative regulation by host of viral transcription (GO:0043922)	1/13	0.0116405	0.032666	0.0144437	0.0403231	-2	10	CCL5	negative regulation by host of viral transcription
GO_Biological_Process_2018		H	embryonic axis specification (GO:0000578)	1/16	0.0143085	0.0342318	0.0175133	0.0418989	-2	10	WNT1	embryonic axis specification
GO_Biological_Process_2018		H	positive regulation of T cell cytokine production (GO:0002726)	1/13	0.0116405	0.032666	0.0144437	0.0403231	-2	10	XCL1	positive regulation of T cell cytokine production
GO_Biological_Process_2018		H	regulation of dendritic cell apoptotic process (GO:2000668)	1/11	0.00985802	0.0315791	0.0123923	0.0403231	-2	10	CCL19	regulation of dendritic cell apoptotic process
GO_Biological_Process_2018		H	positive regulation of NF-kappaB import into nucleus (GO:0042346)	1/16	0.0143085	0.0342318	0.0175133	0.0418989	-2	10	CCL19	positive regulation of NF-kappaB import into nucleus
GO_Biological_Process_2018		H	regulation of fibrinolysis (GO:0051917)	1/14	0.0125306	0.032666	0.0154679	0.0403231	-2	10	KLKB1	regulation of fibrinolysis
GO_Biological_Process_2018		H	positive regulation of glycoprotein biosynthetic process (GO:0010560)	1/12	0.0107496	0.032666	0.0134185	0.0403231	-2	10	CCL19	positive regulation of glycoprotein biosynthetic process
GO_Biological_Process_2018		H	plasminogen activation (GO:0031639)	1/13	0.0116405	0.032666	0.0144437	0.0403231	-2	10	KLKB1	plasminogen activation
GO_Biological_Process_2018		H	steroid catabolic process (GO:0006706)	1/14	0.0125306	0.032666	0.0154679	0.0403231	-2	10	SPP1	steroid catabolic process
GO_Biological_Process_2018		I	positive regulation of myeloid cell apoptotic process (GO:0033034)	1/8	0.0158912	0.07338	0.01913	0.0883355	-3	10	CDKN2A	positive regulation of myeloid cell apoptotic process
GO_Biological_Process_2018		I	positive regulation of killing of cells of other organism (GO:0051712)	1/8	0.0158912	0.07338	0.01913	0.0883355	-3	10	IFNG	positive regulation of killing of cells of other organism
GO_Biological_Process_2018		I	regulation of tyrosine phosphorylation of STAT protein (GO:0042509)	2/62	0.00683701	0.0585497	0.00825155	0.0706632	-2	10	IFNG;EPO	regulation of tyrosine phosphorylation of STAT protein
GO_Biological_Process_2018		I	cellular hyperosmotic response (GO:0071474)	1/7	0.0139184	0.07338	0.017022	0.0883355	-2	10	EPO	cellular hyperosmotic response
GO_Biological_Process_2018		I	negative regulation of embryonic development (GO:0045992)	1/11	0.0217867	0.0778489	0.0254276	0.0909331	-3	10	SFRP2	negative regulation of embryonic development
GO_Biological_Process_2018		I	elastic fiber assembly (GO:0048251)	1/8	0.0158912	0.07338	0.01913	0.0883355	-2	10	LOXL1	elastic fiber assembly
GO_Biological_Process_2018		I	negative regulation of cyclin-dependent protein serine/threonine kinase activity involved in G1/S transition of mitotic cell cycle (GO:0031658)	1/8	0.0158912	0.07338	0.01913	0.0883355	-2	10	CDKN2A	negative regulation of cyclin-dependent protein serine/threonine kinase activity involved in G1/S transition of mitotic cell cycle
GO_Biological_Process_2018		I	positive regulation of autophagy (GO:0010508)	2/68	0.00817431	0.0620984	0.00980624	0.0744958	-2	10	IFNG;DCN	positive regulation of autophagy
GO_Biological_Process_2018		I	very-low-density lipoprotein particle remodeling (GO:0034372)	1/10	0.0198254	0.0759167	0.0233327	0.0899126	-3	10	LIPC	very-low-density lipoprotein particle remodeling
GO_Biological_Process_2018		I	blood circulation (GO:0008015)	2/51	0.00467413	0.047859	0.00572325	0.0586011	-2	10	CXCL10;EPO	blood circulation
GO_Biological_Process_2018		I	negative regulation of cellular process (GO:0048523)	6/535	0.000631099	0.0192147	0.000882507	0.0267935	-1	10	SFRP2;FRZB;CDKN2A;EPO;IGFBP6;WNT16	negative regulation of cellular process
GO_Biological_Process_2018		I	positive regulation of pathway-restricted SMAD protein phosphorylation (GO:0010862)	2/48	0.00415089	0.0454668	0.00510813	0.0559519	-2	10	GDF15;GDF6	positive regulation of pathway-restricted SMAD protein phosphorylation
GO_Biological_Process_2018		I	negative regulation of epithelial cell differentiation (GO:0030857)	1/13	0.0256979	0.0818505	0.0296042	0.0940983	-3	10	IFNG	negative regulation of epithelial cell differentiation
GO_Biological_Process_2018		I	collagen fibril organization (GO:0030199)	2/30	0.00163752	0.030851	0.00211845	0.0394328	-2	10	LUM;LOXL1	collagen fibril organization
GO_Biological_Process_2018		I	positive regulation of peptidyl-serine phosphorylation (GO:0033138)	2/84	0.0122602	0.07338	0.0145298	0.0883355	-2	10	SFRP2;IFNG	positive regulation of peptidyl-serine phosphorylation
GO_Biological_Process_2018		I	sulfur amino acid biosynthetic process (GO:0000097)	1/8	0.0158912	0.07338	0.01913	0.0883355	-2	10	GGT1	sulfur amino acid biosynthetic process
GO_Biological_Process_2018		I	regulation of release of sequestered calcium ion into cytosol (GO:0051279)	2/50	0.00449649	0.0470633	0.0055146	0.0577195	-2	10	CXCL10;CXCL11	regulation of release of sequestered calcium ion into cytosol
GO_Biological_Process_2018		I	positive regulation of leukocyte migration (GO:0002687)	2/35	0.00222573	0.0327599	0.00282564	0.0415899	-2	10	CXCL10;CXCL11	positive regulation of leukocyte migration
GO_Biological_Process_2018		I	chylomicron remnant clearance (GO:0034382)	1/8	0.0158912	0.07338	0.01913	0.0883355	-2	10	LIPC	chylomicron remnant clearance
GO_Biological_Process_2018		I	stress-induced premature senescence (GO:0090400)	1/9	0.0178602	0.0737909	0.0212335	0.0885044	-2	10	WNT16	stress-induced premature senescence
GO_Biological_Process_2018		I	glycosaminoglycan catabolic process (GO:0006027)	2/57	0.00580686	0.0525967	0.00704984	0.0638553	-2	10	LUM;DCN	glycosaminoglycan catabolic process
GO_Biological_Process_2018		J	complement activation, lectin pathway (GO:0001867)	1/11	0.0190872	0.0902534	0.0246183	0.115754	-3	10	C1S	complement activation, lectin pathway
GO_Biological_Process_2018		J	cellular response to nitric oxide (GO:0071732)	1/9	0.0156433	0.0888574	0.0205564	0.115754	-2	10	DPEP1	cellular response to nitric oxide
GO_Biological_Process_2018		J	regulation of synaptic transmission, dopaminergic (GO:0032225)	1/9	0.0156433	0.0888574	0.0205564	0.115754	-2	10	GDNF	regulation of synaptic transmission, dopaminergic
GO_Biological_Process_2018		J	regulation of dopamine uptake involved in synaptic transmission (GO:0051584)	1/9	0.0156433	0.0888574	0.0205564	0.115754	-2	10	GDNF	regulation of dopamine uptake involved in synaptic transmission
GO_Biological_Process_2018		J	secretory granule organization (GO:0033363)	1/10	0.0173667	0.0893958	0.0225894	0.115754	-2	10	F2RL3	secretory granule organization
GO_Biological_Process_2018		J	epithelial cell migration (GO:0010631)	2/37	0.00190669	0.0888574	0.00293857	0.115754	-2	10	FAP;SCG2	epithelial cell migration
GO_Biological_Process_2018		J	positive regulation of branching involved in ureteric bud morphogenesis (GO:0090190)	1/13	0.0225193	0.0913764	0.028664	0.115754	-3	10	GDNF	positive regulation of branching involved in ureteric bud morphogenesis
GO_Biological_Process_2018		J	positive regulation of protein maturation (GO:1903319)	1/10	0.0173667	0.0893958	0.0225894	0.115754	-2	10	CCBE1	positive regulation of protein maturation
GO_Biological_Process_2018		J	homocysteine metabolic process (GO:0050667)	1/10	0.0173667	0.0893958	0.0225894	0.115754	-2	10	DPEP1	homocysteine metabolic process
GO_Biological_Process_2018		J	negative regulation of cellular response to transforming growth factor beta stimulus (GO:1903845)	2/54	0.00402119	0.0888574	0.00597517	0.115754	-2	10	HTRA4;ADAMTSL2	negative regulation of cellular response to transforming growth factor beta stimulus
GO_Biological_Process_2018		J	response to nitric oxide (GO:0071731)	1/12	0.0208047	0.0913764	0.0266432	0.115754	-2	10	DPEP1	response to nitric oxide
[truncated: 2,729 more rows]
