# Supplementary material for: The Transcriptomic Landscape of Age-Induced Changes in Human Visceral Fat and the Predicted Omentum-Liver Connectome in Males
Source: Biomedicines. 2023 May 14;11(5):1446. doi: 10.3390/biomedicines11051446 (PMC10216224; doi:10.3390/biomedicines11051446)
Supplement: Supplementary file 1 [file biomedicines-11-01446-s001.zip › Material_S5.xlsx]

## Sheet: Males
Subject ID	GTEX-111CU	GTEX-111YS	GTEX-117YW	GTEX-117YX	GTEX-1192X	GTEX-11DXY	GTEX-11DXZ	GTEX-11DYG	GTEX-11EQ9	GTEX-11GS4	GTEX-11GSO	GTEX-11LCK	GTEX-11NUK	GTEX-11NV4	GTEX-11OF3	GTEX-11P7K	GTEX-11P82	GTEX-11PRG	GTEX-11TT1	GTEX-11WQK	GTEX-11ZUS	GTEX-1212Z	GTEX-12584	GTEX-12696	GTEX-12BJ1	GTEX-12C56	GTEX-12KS4	GTEX-12WSA	GTEX-12WSC	GTEX-12WSF	GTEX-12WSI	GTEX-12WSL	GTEX-12WSM	GTEX-12ZZW	GTEX-13111	GTEX-13112	GTEX-131XE	GTEX-131XF	GTEX-131XH	GTEX-132NY	GTEX-132Q8	GTEX-132QS	GTEX-1339X	GTEX-1399T	GTEX-139T6	GTEX-139TU	GTEX-139YR	GTEX-13FHO	GTEX-13FTW
age	50-59	60-69	50-59	50-59	50-59	60-69	50-59	60-69	30-39	60-69	60-69	30-39	50-59	60-69	60-69	30-39	20-29	50-59	20-29	50-59	30-39	60-69	40-49	60-69	60-69	20-29	30-39	60-69	50-59	70-79	50-59	50-59	60-69	50-59	50-59	50-59	50-59	60-69	50-59	60-69	60-69	60-69	40-49	60-69	50-59	60-69	50-59	60-69	40-49
MicroenvironmentScore	1.0385	0.9441	0.9281	0.9863	0.9299	0.9154	0.9603	0.8666	1.075	0.923	1.0171	1.1704	0.7948	0.7996	0.8816	0.9996	1.0446	0.8876	0.7146	0.8422	0.8422	0.9108	0.9597	0.8533	0.9957	0.9866	0.9842	0.9299	0.8501	1.0594	0.9239	0.9623	0.8852	0.8636	1.0838	0.8988	1.0623	1.0752	0.886	0.9682	1.2013	1.0405	0.7686	0.8562	1.1402	0.8964	0.955	1.1817	1.212
iDC	0.2537	0.5876	0.9714	1.4814	0.5769	1.2289	0.9386	1.2641	0.5829	0.7528	0.9726	0.6172	0.8309	1.0594	1.0657	0.9653	0.7369	1.8078	0	0.6941	0.7764	1.7919	0.7084	0.8141	0.3529	0.6078	1.3132	0.8227	1.3374	1.9188	1.0226	0.3852	1.0957	1.0452	0.5048	0.552	1.0413	1.3566	1.5431	2.0117	0.5546	0.8571	0.6246	1.5623	0.8066	1.0931	0.9679	0.7546	0.8639
HSC	0.6217	0.8134	0.9699	0.4882	1.0781	1.0234	1.4285	1.0368	0.83	1.0272	0.8087	0.6288	1.3426	1.1882	1.2263	0.834	0.774	1.2968	0.405	0.517	1.1449	1.0382	0.7884	0.8047	0.8997	0.7416	0.9604	0.7779	0.7856	0.8059	1.2392	0.7262	0.8165	0.7212	0.6582	1.3154	0.7164	0.8374	0.9392	0.7878	0.8485	0.7701	0.4882	1.4533	0.9103	0.8095	0.692	0.7155	0.6148
StromaScore	0.8524	0.8016	0.7776	0.7204	0.8274	0.8066	0.8922	0.7914	0.7926	0.8366	0.8574	0.8461	0.7562	0.7633	0.8396	0.8441	0.7682	0.7472	0.67	0.7477	0.7951	0.7916	0.8254	0.7752	0.8796	0.8005	0.8354	0.7912	0.7204	0.8599	0.8248	0.8426	0.7731	0.7276	0.7448	0.8928	0.9507	0.8032	0.8004	0.8082	0.8388	0.8072	0.6674	0.8026	0.8418	0.7668	0.7857	0.854	0.8176
Endothelial cells	0.5905	0.5885	0.5822	0.4284	0.7925	0.5544	0.7578	0.6455	0.5651	0.6846	0.5785	0.5685	0.69	0.661	0.6743	0.7179	0.5683	0.6579	0.4208	0.6329	0.6479	0.5413	0.8138	0.6218	0.716	0.5757	0.6532	0.747	0.5007	0.5958	0.6812	0.6199	0.5793	0.5526	0.5854	0.7055	0.6765	0.6405	0.6159	0.5432	0.7192	0.6182	0.3966	0.6508	0.787	0.5496	0.5933	0.5754	0.5066
Smooth muscle	0.5593	0.5955	0.5691	0.703	0.5992	0.7036	0.5509	0.6697	0.5088	0.5629	0.6358	0.5622	0.607	0.7082	0.7	0.6239	0.5742	0.6742	0.7138	0.6746	0.7072	0.5479	0.5729	0.6263	0.4987	0.5161	0.6125	0.6252	0.6997	0.5626	0.6814	0.6841	0.6023	0.7247	0.5508	0.6935	0.6649	0.5899	0.6239	0.6927	0.531	0.5958	0.6925	0.7449	0.4807	0.5739	0.6187	0.6323	0.481
Fibroblasts	0.4638	0.4734	0.6252	0.502	0.6677	0.743	0.7134	0.733	0.4941	0.6715	0.6806	0.5302	0.6443	0.6142	0.6059	0.5368	0.4596	0.6468	0.3559	0.6068	0.5946	0.6673	0.5982	0.4633	0.5289	0.4313	0.5854	0.6194	0.6048	0.6989	0.6151	0.5796	0.5848	0.6965	0.4005	0.6957	0.6619	0.5118	0.5156	0.628	0.7086	0.47	0.3887	0.6365	0.5253	0.739	0.463	0.7042	0.5169
ly Endothelial cells	0.4778	0.4374	0.469	0.2616	0.6006	0.3989	0.5659	0.511	0.4621	0.5733	0.448	0.4507	0.5476	0.4984	0.5389	0.5737	0.449	0.5434	0.3019	0.4689	0.5184	0.4027	0.6469	0.4446	0.5756	0.46	0.4592	0.6075	0.3599	0.4275	0.5727	0.4682	0.4322	0.3747	0.4876	0.5876	0.5207	0.48	0.4698	0.3822	0.5439	0.4547	0.2311	0.5129	0.6507	0.4041	0.4373	0.4243	0.4048
Preadipocytes	0.3464	0.3568	0.387	0.6155	0.2625	0.3546	0.2574	0.462	0.2474	0.2414	0.4351	0.4574	0.3327	0.3971	0.4984	0.5647	0.5327	0.3419	0.354	0.4904	0.281	0.4091	0.2124	0.3482	0.23	0.4355	0.6374	0.2402	0.4765	0.5516	0.4607	0.3762	0.4413	0.4373	0.3644	0.3771	0.3827	0.5738	0.4853	0.4323	0.2644	0.4262	0.4941	0.3898	0.3393	0.4049	0.2104	0.3788	0.5544
Adipocytes	0.6506	0.5412	0.3477	0.5103	0.1947	0.3157	0.3131	0.2044	0.5259	0.317	0.4557	0.5935	0.1781	0.2514	0.3989	0.4335	0.5085	0.1896	0.5634	0.2557	0.3477	0.3746	0.2387	0.4653	0.5142	0.594	0.4321	0.2159	0.3353	0.4251	0.3532	0.4857	0.3821	0.2062	0.5037	0.3843	0.563	0.454	0.4693	0.4452	0.2498	0.5263	0.5496	0.318	0.3714	0.2451	0.515	0.4284	0.6118
mv Endothelial cells	0.2618	0.2433	0.2406	0.1697	0.35	0.2195	0.3395	0.2557	0.2774	0.2936	0.2409	0.2448	0.2798	0.2716	0.2744	0.312	0.2315	0.3007	0.1863	0.2811	0.2535	0.2417	0.3629	0.2481	0.3087	0.2436	0.2321	0.3422	0.1955	0.2131	0.3003	0.2537	0.228	0.1906	0.2757	0.3131	0.3147	0.2653	0.2601	0.2201	0.2834	0.271	0.1787	0.2486	0.353	0.1974	0.3084	0.2464	0.2258
Chondrocytes	0.1693	0.1425	0.197	0.2119	0.2934	0.2348	0.3214	0.2717	0.1112	0.2219	0.203	0.1925	0.2141	0.2662	0.2387	0.2039	0.2196	0.28	0.0302	0.1096	0.2977	0.2408	0.1569	0.2003	0.1648	0.164	0.2276	0.1708	0.3217	0.2365	0.3029	0.2527	0.2624	0.2032	0.1257	0.2325	0.1818	0.2069	0.2109	0.2148	0.1483	0.1348	0.1246	0.2241	0.1957	0.2243	0.1677	0.2296	0.1996
ImmuneScore	0.1861	0.1425	0.1505	0.2659	0.1025	0.1088	0.0681	0.0752	0.2824	0.0864	0.1597	0.3243	0.0386	0.0363	0.0421	0.1555	0.2764	0.1404	0.0445	0.0945	0.0471	0.1192	0.1343	0.0781	0.1161	0.1861	0.1489	0.1387	0.1297	0.1995	0.0991	0.1197	0.1121	0.136	0.339	0.006	0.1116	0.272	0.0856	0.16	0.3625	0.2332	0.1012	0.0535	0.2983	0.1295	0.1693	0.3277	0.3944
Monocytes	0.1978	0.1543	0.106	0.2191	0.0291	0.0434	0.0241	0.0137	0.3563	0.079	0.0983	0.3542	0	0	0	0.1274	0.2815	0.0351	0.0493	0.0662	0	0.0364	0.1576	0.0705	0.1333	0.2009	0.0891	0.1013	0.075	0.0962	0.0257	0.1224	0.0797	0.1152	0.3755	0	0.1157	0.2612	0.0334	0.07	0.0765	0.2423	0.1025	0	0.3076	0.0714	0.1698	0.3437	0.4325
CLP	0.1219	0.1615	0.1043	0.1683	0.1052	0.1285	0.0882	0.1368	0.1991	0.0764	0.1359	0.1331	0.1169	0.1251	0.1225	0.1654	0.1751	0.1551	0.259	0.1963	0.137	0.1102	0.1154	0.2196	0.1535	0.1782	0.1107	0.1443	0.1194	0.1599	0.165	0.1286	0.1394	0.1093	0.1752	0.1158	0.0952	0.1337	0.145	0.1327	0.0978	0.1787	0.2074	0.137	0.1211	0.0787	0.1254	0.101	0.1468
aDC	0.076	0.0688	0.3868	0	0.4448	0.0889	0.2426	0	0.0362	0.2614	0.0611	0.0882	0.1075	0	0	0.0748	0	0.1579	0.0039	0.0412	0.0681	0	0.1136	0	0.3925	0	0.2335	0.0136	0	0.1744	0.1579	0.125	0	0	0.1743	0	0.1021	0	0	0	0.2655	0.0636	0	0	0.0838	0.1934	0.1386	0.3499	0.1989
cDC	0	0.0627	0.1281	0.1274	0.0865	0.0667	0.0774	0.1019	0.0305	0.0899	0.1221	0.0254	0.1236	0.085	0.0834	0.0805	0.0572	0.3753	0	0.0369	0.0689	0.1906	0.0338	0.059	0.0118	0.016	0.1112	0.0137	0.1677	0.1927	0.1711	0.0306	0.0878	0.0301	0.0511	0.0358	0.0708	0.2019	0.1385	0.1405	0.0072	0.0643	0.0114	0.1571	0.0172	0.1044	0.0823	0.2243	0.0797
Mesangial cells	0.0765	0.0645	0.0568	0.0725	0.1038	0.0679	0.0828	0.0811	0.0282	0.0959	0.0732	0.0893	0.0475	0.0635	0.0644	0.0525	0.0814	0.0427	0	0.0348	0.0942	0.0773	0.0371	0.039	0.0692	0.0572	0.0899	0.0786	0.0681	0.113	0.0599	0.0805	0.0665	0.0808	0.074	0.0781	0.0672	0.0921	0.0359	0.0722	0.0803	0.0688	0.0335	0.05	0.1	0.093	0.0667	0.0917	0.0831
MEP	0.045	0.0569	0.0337	0.0755	0.0567	0.1132	0.1021	0.0955	0.0767	0.0559	0.0876	0.0158	0.0912	0.0587	0.0463	0.0845	0.1017	0.1013	0.0909	0.0623	0.0673	0.1672	0.0572	0.1089	0.0753	0.0826	0.0825	0.0352	0.1057	0.0891	0.1211	0.0198	0.0457	0.0617	0.0555	0.1311	0.0513	0.0783	0.0998	0.0769	0.0372	0.0868	0.0921	0.0823	0.0396	0.0617	0.0431	0.043	0.0764
Astrocytes	0	0	0.1218	0	0.1262	0.1155	0.2535	0.0963	0	0.0884	0.0295	0.0212	0.1169	0.0967	0.1172	0	0.0379	0.1259	0	0.0487	0.2004	0.1983	0.0384	0	0	0.0471	0.101	0.0008	0.0791	0.1393	0.1322	0.0238	0.0321	0	0	0.1213	0.0316	0	0.0378	0.1297	0	0.0298	0	0.1346	0.0062	0.0391	0	0.1217	0.0406
DC	0	0.0245	0.0899	0.1184	0.0457	0.0845	0.0509	0.0714	0.0098	0.0324	0.0679	0.0299	0.0418	0.0477	0.0508	0.0458	0.0234	0.1493	0	0.032	0.0368	0.0909	0.0201	0.0327	0.0196	0.0163	0.1064	0.0297	0.0851	0.1641	0.0772	0.0166	0.0638	0.0601	0.0153	0.009	0.0399	0.0862	0.087	0.1439	0.0326	0.0453	0.0222	0.0803	0.0289	0.0864	0.0583	0.0754	0.0541
Macrophages M2	0.0388	0.0673	0.0804	0.0768	0.091	0.0199	0.0463	0.0322	0.0558	0.0419	0.1275	0.0677	0.0037	0.0078	0.0063	0.0462	0.0391	0.0769	0.0293	0.0542	0.0094	0.0319	0.0385	0.0412	0.0263	0.0269	0.0202	0.0446	0.0301	0.0285	0.0783	0.0517	0.0392	0.0302	0.0417	0.0004	0.0246	0.0903	0.0244	0.0072	0.0613	0.0703	0.0291	0.0151	0.0658	0.0343	0.0612	0.1388	0.0685
Neutrophils	0.0813	0.0241	0.0069	0.0028	0.0018	0	0.0071	0.0055	0.0531	0.0056	0.0076	0.1018	0	0	0.0062	0.0514	0.0949	0	0.0088	0.0096	0.0098	0.0111	0.0238	0.014	0.0186	0.0619	0.0072	0.0381	0.0063	0.0193	0.0057	0.0405	0.0107	0.004	0.1154	0	0.0118	0.0258	0.0033	0.0066	0.0156	0.0457	0.0121	0	0.0905	0.0105	0.0259	0.0111	0.1045
Megakaryocytes	0.0262	0.0457	0.0348	0.0209	0.0315	0.0284	0.0363	0.0513	0.0268	0.0497	0.0239	0.0385	0.0289	0.0379	0.0322	0.0293	0.0234	0.0452	0.0071	0.0232	0.0501	0.0418	0.0474	0.0195	0.0473	0.0249	0.0206	0.0427	0.0224	0.0262	0.0511	0.0407	0.037	0.033	0.0215	0.0289	0.0144	0.0417	0.0317	0.0295	0.0416	0.0297	0.0166	0.0526	0.0351	0.0298	0.0265	0.0254	0.0242
Basophils	0.0387	0.0213	0.087	0	0.0163	0	0	0	0.0756	0.061	0.0668	0.0699	0	0	0	0	0.0426	0	0	0.0125	0	0.0638	0.1918	0	0.0051	0	0	0.0023	0.0379	0.0281	0	0	0.0177	0.0516	0.1206	0	0	0.0784	0	0	0	0.009	0.0102	0	0.0375	0.1195	0	0.0818	0.0416
MSC	0	0.0308	0.161	0	0	0.008	0	0	0.0837	0	0	0	0.2857	0	0	0	0	0.2711	0.118	0	0	0.1705	0	0.0568	0.1713	0	0	0	0	0	0	0	0	0	0	0	0	0	0.1036	0	0	0	0.0658	0.0849	0	0	0	0	0
NKT	0.0463	0.0596	0.0296	0.0176	0.0215	0	0.0173	0	0.051	0.0296	0.0431	0.0389	0	0	0	0.0541	0.0961	0	0.0805	0.0114	0.0052	0.062	0	0	0.0697	0.0939	0	0	0	0.0105	0.001	0.0262	0.0209	0	0.0625	0	0.0942	0.0137	0	0	0	0.0655	0.005	0	0	0	0	0	0.0482
Epithelial cells	0.0133	0.0267	0.0215	0.0166	0.0144	0.0221	0.0095	0.031	0.0068	0.0077	0.0277	0.0103	0.0231	0.0172	0.0155	0.0096	0.0083	0.0128	0.0124	0.0257	0.0092	0.0401	0.003	0.0148	0.0093	0.0065	0.0273	0.0137	0.034	0.0154	0.0139	0.0215	0.0242	0.0253	0.0003	0.0191	0.0125	0.0152	0.0176	0.0207	0.0115	0.0177	0.031	0.016	0.0155	0.0655	0.0002	0.0008	0.0071
GMP	0	0.0023	0	0.0441	0	0	0.0945	0	0.0438	0	0	0	0.0218	0.0267	0.0071	0.0007	0	0.02	0	0	0	0	0	0	0.0284	0	0.0314	0	0	0.0018	0.0237	0	0	0.0093	0	0.0138	0	0.0339	0	0	0	0.0047	0	0.0444	0.0052	0	0	0.0087	0.0328
Eosinophils	0	0.0003	0.0094	0.014	0.0253	0.0218	0.0201	0.0209	0	0.0126	0.0271	0	0.0161	0.0067	0.0061	0.0087	0.0148	0.0094	0	0.0145	0.0241	0.0321	0	0	0.0027	0	0.0206	0.039	0.0174	0.0196	0.025	0	0.014	0.0247	0	0	0	0.0177	0.0047	0.0195	0.0137	0.0013	0.0079	0	0.0205	0.0206	0	0.008	0
Th1 cells	0.01	0	0.0013	0.023	0.0548	0.0333	0	0.0014	0.0047	0.0165	0.0094	0	0	0.0201	0	0	0.0161	0.0178	0.1223	0.0464	0	0.0375	0.0249	0.0261	0.0274	0.0081	0	0.0184	0.0099	0.0015	0.0402	0	0.0004	0.0117	0	0.0032	0.0191	0	0.0238	0.0074	0.0322	0.0439	0.0666	0	0	0	0.0105	0	0.0106
CD8+ Tcm	0	0.0039	0.0411	0.0017	0.0412	0.0241	0	0.0127	0	0.0431	0.0004	0.0056	0	0.026	0.0022	0	0	0	0	0	0	0	0	0	0	0	0	0	0	0	0.0719	0	0.0323	0.0046	0	0	0	0	0	0	0.1341	0	0	0.0032	0	0.0162	0.0111	0	0
B-cells	0	0	0	0	0	0	0	0	0	0	0	0	0	0	0	0	0	0	0	0	0	0	0	0	0	0	0	0	0	0	0	0	0	0	0	0	0	0	0	0	0.3238	0	0	0	0	0	0	0	0
Osteoblast	0.0211	0.0042	0	0	0	0	0	0	0.0424	0	0	0	0	0	0	0	0.0186	0	0.1329	0.003	0	0	0.0048	0.0521	0.0087	0.0034	0	0.0009	0	0	0.0106	0	0	0	0.0421	0	0.0157	0	0	0	0	0.0539	0.0846	0	0	0	0.0373	0	0.0398
CD4+ Tcm	0	0	0.005	0	0.0743	0.0079	0	0.0151	0	0.0243	0.0059	0	0	0	0	0	0	0	0	0.0222	0	0	0	0	0	0	0	0.0283	0	0	0	0	0.0238	0.0438	0	0	0	0	0	0	0.0824	0	0	0	0	0.0261	0.0133	0.0078	0
Th2 cells	0	0.0224	0.0044	0.0381	0.0076	0	0	0	0	0	0	0.0129	0	0	0	0	0	0	0.0027	0	0	0	0	0	0.003	0.0069	0	0	0	0	0.0076	0.0169	0.0137	0	0	0	0	0	0	0	0.0069	0.0204	0	0	0	0	0.0216	0.0315	0.0254
Hepatocytes	0	0.0018	0	0	0.0078	0	0.0065	0.0048	0	0.0093	0.0064	0	0	0	0	0	0.007	0	0	0	0	0.0052	0	0	0	0.0034	0.0003	0	0	0.0002	0	0.0039	0.0003	0	0.0018	0	0.0072	0.0043	0	0	0.0031	0.0019	0	0	0.0161	0.0052	0	0.0055	0.0083
CD8+ Tem	0	0	0.0217	0	0.0459	0.0373	0.0044	0.0025	0	0.0328	0	0	0	0.0138	0	0	0	0	0	0	0	0	0	0	0	0	0	0.0126	0	0	0.015	0	0.0096	0	0	0	0	0	0	0	0.0804	0	0	0	0	0	0.0121	0	0
Myocytes	0	0.0055	0.0007	0.0083	0	0	0.0022	0	0	0	0.0048	0.0015	0.0007	0	0	0.011	0.0108	0	0.0159	0.0161	0.01	0.0298	0	0	0.0003	0.0029	0.0001	0.0015	0	0.0052	0.001	0.0109	0	0	0	0	0	0.0066	0.0036	0	0	0.0104	0.0186	0	0.0013	0	0.0043	0	0.0246
Macrophages	0	0.0106	0.0116	0.0446	0.0383	0	0	0	0.0044	0	0.0325	0.0005	0	0	0	0	0	0.0168	0.0087	0.0194	0	0	0	0	0	0	0	0	0	0	0.0151	0	0	0	0	0	0	0.013	0	0	0	0.0152	0.0071	0	0	0	0	0.0534	0.0005
CD4+ naive T-cells	0	0	0	0	0.0114	0.0173	0	0	0	0.0047	0	0	0	0	0	0	0	0	0	0	0	0	0	0	0	0	0	0	0	0	0	0	0	0	0	0	0	0	0	0	0.0552	0	0	0	0	0	0	0	0
Memory B-cells	0	0	0	0	0	0	0	0	0	0	0	0	0	0	0	0	0	0	0	0	0	0	0	0	0	0	0	0	0	0	0	0	0	0	0	0	0	0	0	0	0.1175	0	0	0	0	0	0	0	0
Class-switched memory B-cells	0	0	0	0	0.0179	0	0	0	0	0	0	0	0	0	0	0	0	0	0	0	0	0	0	0	0	0	0	0	0	0	0	0	0	0	0	0	0	0	0	0	0.1038	0	0	0	0	0	0	0.0015	0
CD8+ T-cells	0	0	0	0	0.0135	0	0	0	0	0	0	0	0	0	0	0	0	0	0	0	0	0	0	0	0	0	0	0	0	0	0	0	0	0	0	0	0	0	0	0	0.0815	0	0	0	0	0	0	0	0
CMP	0	0	0	0	0	0.0162	0.0152	0.008	0	0	0	0	0.016	0.0105	0.0016	0	0	0.0054	0	0	0	0.0158	0	0	0	0	0	0	0.0023	0	0.0094	0	0	0.0084	0	0.0065	0	0	0	0.0011	0	0	0	0.0062	0	0	0	0.0043	0
Skeletal muscle	0.0001	0	0.0088	0	0.0094	0.0062	0.01	0.0043	0	0.0131	0.0027	0	0.0101	0	0	0	0.0079	0.0114	0	0.0009	0	0.014	0	0.0067	0.0031	0	0	0	0	0	0	0	0	0	0	0.0049	0.0036	0	0.0065	0.001	0	0.0077	0.0036	0.008	0	0	0	0	0.0002
Neurons	0.001	0.0011	0.0012	0.001	0.0012	0.0019	0.0029	0.0026	0.0016	0.0025	0.0009	0.0012	0.0048	0.004	0.0043	0.0026	0.0022	0.0018	0.0009	0.003	0.0054	0.0043	0.0012	0.0012	0.0015	0.0023	0.0026	0.0019	0.0029	0.0021	0.0083	0.0015	0.0017	0.0023	0.0014	0.003	0.0012	0.0011	0.0026	0.0043	0.001	0.0014	0.0011	0.0042	0.0015	0.0024	0.0012	0.0006	0.0012
naive B-cells	0	0	0	0	0	0	0	0	0	0	0	0	0	0	0	0	0	0	0	0	0	0	0	0	0	0	0	0	0	0	0	0	0	0	0	0	0	0	0	0	0.0725	0	0	0	0	0	0	0	0
Pericytes	0	0	0	0	0	0	0.0726	0	0	0.0362	0	0	0	0	0	0	0	0	0	0	0	0	0	0	0	0	0	0	0	0	0	0	0	0	0	0	0	0	0	0	0	0	0	0	0.0092	0	0	0	0
Melanocytes	0.0085	0.0052	0.0051	0	0.0068	0	0.0053	0.0037	0.0093	0.0108	0.0043	0	0.0043	0	0	0	0.002	0.0094	0.0033	0.0007	0	0.0121	0	0.0044	0.0038	0	0	0	0	0	0	0	0	0	0	0.0045	0.0033	0	0.0066	0	0	0.0056	0.0033	0.0045	0	0	0	0	0
Plasma cells	0	0	0	0	0.0012	0	0	0	0	0	0	0	0	0	0	0	0	0	0.0169	0.0074	0	0	0	0	0	0	0	0	0	0	0	0	0	0	0	0	0	0	0	0	0.0188	0	0.0111	0	0	0	0	0	0
Mast cells	0	0	0.002	0	0	0.0135	0	0.0013	0	0	0.0062	0	0	0	0	0	0	0	0	0	0	0.0083	0	0	0	0	0	0	0.0108	0	0	0	0	0	0.0023	0	0	0.0041	0	0	0	0	0	0	0	0.0054	0	0	0
Macrophages M1	0	0	0	0.0051	0.0129	0	0	0	0	0	0	0	0	0	0	0.0017	0	0	0.0032	0.0104	0	0	0	0.0119	0	0	0	0	0	0	0	0	0	0	0	0	0	0	0	0	0	0.0028	0.013	0	0	0	0	0	0
CD8+ naive T-cells	0	0	0.004	0.0011	0.0041	0.0011	0	0.0076	0	0.0027	0.0034	0	0	0.0007	0	0	0	0.0009	0	0.0038	0	0.0041	0	0	0	0	0	0.0017	0	0	0.0079	0	0	0.0012	0	0	0	0	0.0018	0	0.0017	0	0.0001	0.0029	0	0.0001	0.0017	0	0
Tregs	0	0	0	0.0022	0	0	0	0	0	0	0	0	0	0	0	0	0	0	0	0	0	0	0	0	0	0	0	0	0	0	0	0	0	0	0	0	0	0	0	0	0	0	0	0	0	0	0	0	0.0101
CD4+ memory T-cells	0	0	0	0	0.0034	0	0	0	0	0	0	0	0	0	0	0	0	0	0	0	0	0	0	0	0	0	0	0	0	0	0	0	0	0	0	0	0	0	0	0	0.0067	0	0	0	0	0	0	0	0
CD4+ Tem	0	0	0	0	0	0	0	0	0	0	0	0	0	0	0	0	0	0	0	0	0	0	0	0	0	0	0	0	0	0	0	0	0	0	0	0	0	0	0	0	0	0	0	0	0	0	0	0	0
Keratinocytes	0	0.0023	0	0.0021	0	0	0	0	0	0	0	0	0	0	0	0	0	0	0	0.0012	0	0.0017	0	0.0009	0	0	0.0024	0	0.0007	0	0.0005	0	0	0	0	0	0	0	0.0001	0	0	0	0.0031	0	0	0.0034	0	0	0
pDC	0	0	0	0	0	0	0	0	0	0	0	0	0	0	0	0	0	0	0	0	0	0	0	0	0	0	0	0	0	0	0	0	0	0	0	0	0	0	0	0	0	0	0	0	0	0	0	0	0
CD4+ T-cells	0	0	0	0	0	0	0	0	0	0	0	0	0	0	0	0	0	0	0	0	0	0	0	0	0	0	0	0	0	0	0	0	0	0	0	0	0	0	0	0	0	0	0	0	0	0	0	0	0
pro B-cells	0	0	0	0	0	0	0	0	0	0	0	0	0	0	0	0	0	0	0	0	0	0	0	0	0	0	0	0	0	0	0	0	0	0	0	0	0	0	0	0	0	0	0	0	0	0	0	0	0
Erythrocytes	0	0	0	0	0	0	0	0	0	0	0	0	0	0	0	0	0	0	0	0	0	0	0	0	0	0	0	0	0	0	0	0	0	0.0005	0	0	0	0	0	0	0	0	0	0	0	0	0	0.0011	0
Sebocytes	0	0	0	0	0	0	0	0	0	0	0	0	0	0	0	0	0	0	0	0	0	0	0	0	0	0	0	0	0	0	0	0	0	0	0	0	0	0	0	0	0	0	0	0	0	0.0001	0	0	0
MPP	0	0	0	0	0	0	0	0	0	0	0	0	0	0	0	0	0	0	0	0	0	0	0	0	0	0	0	0	0	0	0	0	0	0	0	0	0	0	0	0	0	0	0	0	0	0	0	0	0
NK cells	0	0	0	0	0	0	0	0	0	0	0	0	0	0	0	0	0	0	0	0	0	0	0	0	0	0	0	0	0	0	0	0	0	0	0	0	0	0	0	0	0	0	0	0	0	0	0	0	0
Platelets	0	0	0	0	0	0	0	0	0	0	0	0	0	0	0	0	0	0	0	0	0	0	0	0	0	0	0	0	0	0	0	0	0	0	0	0	0	0	0	0	0	0	0	0	0	0	0	0	0
Tgd cells	0	0	0	0	0	0	0	0	0	0	0	0	0	0	0	0	0	0	0	0	0	0	0	0	0	0	0	0	0	0	0	0	0	0	0	0	0	0	0	0	0	0	0	0	0	0	0	0	0
[truncated: 192 more columns]

## Sheet: Females
Subject ID	GTEX-1117F	GTEX-1122O	GTEX-1128S	GTEX-113JC	GTEX-11DXX	GTEX-11EM3	GTEX-11I78	GTEX-11P81	GTEX-11VI4	GTEX-11XUK	GTEX-11ZTS	GTEX-1211K	GTEX-12WSG	GTEX-12WSK	GTEX-12ZZX	GTEX-13113	GTEX-1313W	GTEX-131XG	GTEX-131YS	GTEX-132AR	GTEX-133LE	GTEX-1399S	GTEX-139D8	GTEX-13CF3	GTEX-13D11	GTEX-13FH7	GTEX-13FTX	GTEX-13JUV	GTEX-13N11	GTEX-13OVJ	GTEX-13PL6	GTEX-13PL7	GTEX-13PVR	GTEX-13QBU	GTEX-13S7M	GTEX-13U4I	GTEX-13VXT	GTEX-13W3W	GTEX-13X6H	GTEX-13X6K	GTEX-145ME	GTEX-145MI	GTEX-146FH	GTEX-146FR	GTEX-14AS3	GTEX-14BIM	GTEX-14BIN	GTEX-14BMU	GTEX-14DAQ
age	60-69	60-69	60-69	50-59	60-69	20-29	50-59	30-39	40-49	40-49	60-69	60-69	50-59	40-49	40-49	60-69	50-59	50-59	60-69	50-59	20-29	30-39	30-39	60-69	50-59	50-59	20-29	40-49	50-59	50-59	40-49	60-69	60-69	40-49	60-69	40-49	20-29	60-69	50-59	60-69	40-49	60-69	50-59	60-69	40-49	60-69	50-59	20-29	60-69
MicroenvironmentScore	0.9225	0.836	1.0365	0.8285	0.8582	1.36	1.0612	1.0314	1.0457	0.9205	0.9993	0.9586	1.0607	1.108	0.826	1.1044	0.8783	1.0632	0.8188	1.2215	1.1424	1.0542	0.9598	0.8809	1.1118	0.8732	1.0481	0.8757	1.1545	1.0214	0.8479	1.1533	1.0402	1.078	0.8207	1.1111	1.0425	1.0269	1.1094	0.8861	0.9908	0.9109	1.1039	1.1943	0.8272	0.8461	0.8827	1.0553	0.8496
HSC	0.7758	0.636	0.808	1.1086	0.7935	0.7649	0.5682	0.6601	0.9691	0.5315	1.0613	0.6388	0.7391	0.8098	1.2667	0.6811	1.1962	0.5064	1.2576	0.6215	0.5431	0.5976	0.7825	0.6076	0.6816	0.6787	0.6594	1.0448	0.8267	0.7344	0.9482	0.6845	0.743	0.6333	0.7619	0.7444	0.7196	0.8251	0.5587	1.4177	0.7721	0.9282	0.6929	0.922	1.2451	1.0094	1.091	0.5212	1.0122
StromaScore	0.8304	0.7037	0.7976	0.7555	0.7686	0.7422	0.7555	0.8672	0.7803	0.7925	0.9214	0.7908	0.8372	0.8306	0.826	0.854	0.8746	0.7836	0.796	0.8822	0.7886	0.7642	0.8098	0.7882	0.8084	0.8234	0.8635	0.8426	0.871	0.795	0.7857	0.7528	0.7981	0.8163	0.7148	0.8031	0.7564	0.7383	0.6974	0.7932	0.7738	0.8264	0.8768	0.7787	0.8131	0.8232	0.7936	0.7792	0.7901
iDC	0.5868	0.3431	1.0196	0.4104	0.2341	0.7144	0.3066	0.9898	0.3534	0.3072	0.8917	0.4825	1.3373	0.9039	0.1888	0.575	0.1721	0.507	0.7427	1.5895	1.3349	0.872	1.2946	0.2424	0.7502	0.2531	0.7745	0.3554	1.1849	0.5814	0.9847	0.8318	0.849	0.8225	0.9241	1.8543	0.6297	0.8783	1.1111	0.626	0.9303	0.6679	1.4452	0.729	0.5642	0.4236	0.9577	0.6796	0.8836
Smooth muscle	0.6556	0.6158	0.6784	0.8112	0.6975	0.4118	0.4933	0.5867	0.4892	0.5139	0.7216	0.6298	0.6136	0.4954	0.7062	0.5256	0.6584	0.5903	0.669	0.6586	0.5491	0.4807	0.6443	0.4229	0.6044	0.6004	0.4514	0.6318	0.5571	0.6193	0.7879	0.4373	0.5215	0.4853	0.598	0.7116	0.562	0.603	0.6251	0.7039	0.65	0.658	0.7145	0.5066	0.5571	0.6963	0.6433	0.5949	0.6461
Endothelial cells	0.7618	0.5448	0.7332	0.6323	0.5361	0.6232	0.447	0.6131	0.7212	0.5415	0.5986	0.5624	0.5852	0.6599	0.7358	0.6383	0.745	0.4957	0.6097	0.5699	0.4971	0.4338	0.5577	0.6563	0.6702	0.6165	0.5781	0.8638	0.6653	0.6434	0.663	0.4999	0.6008	0.5908	0.5234	0.5958	0.5406	0.645	0.3886	0.768	0.6323	0.7729	0.5189	0.6589	0.7482	0.7539	0.6659	0.5149	0.5799
Fibroblasts	0.607	0.3392	0.6385	0.7469	0.5188	0.5352	0.4026	0.543	0.5611	0.4475	0.785	0.5352	0.728	0.5992	0.4962	0.604	0.598	0.4415	0.6243	0.6834	0.5139	0.4999	0.661	0.3841	0.5634	0.4129	0.4954	0.611	0.5013	0.5853	0.812	0.5435	0.5625	0.5458	0.7471	0.698	0.5756	0.6954	0.5874	0.5416	0.7414	0.6622	0.5777	0.5184	0.5493	0.5247	0.643	0.4401	0.6751
ly Endothelial cells	0.5501	0.4309	0.5088	0.4595	0.3729	0.4422	0.3271	0.4403	0.6168	0.4022	0.4284	0.4294	0.4373	0.4794	0.6237	0.4899	0.6252	0.3658	0.4771	0.3568	0.3427	0.3308	0.3692	0.4779	0.5013	0.4482	0.4491	0.7146	0.4678	0.4819	0.4613	0.3365	0.4685	0.4152	0.3809	0.4076	0.4124	0.4974	0.2829	0.6005	0.4386	0.567	0.3736	0.5322	0.5817	0.6128	0.6006	0.3468	0.4438
Adipocytes	0.2921	0.5234	0.2234	0.1318	0.4822	0.3261	0.6615	0.5784	0.2783	0.596	0.4592	0.4839	0.3613	0.4022	0.42	0.4658	0.4062	0.6299	0.3581	0.5111	0.5662	0.5947	0.4008	0.536	0.3833	0.6173	0.6535	0.2104	0.5754	0.3612	0.0963	0.4623	0.4329	0.496	0.1591	0.3124	0.3965	0.1361	0.4187	0.2769	0.174	0.2178	0.6569	0.3801	0.3286	0.3677	0.2784	0.6035	0.3252
Preadipocytes	0.3503	0.13	0.4663	0.4621	0.2398	0.5071	0.4984	0.3219	0.2699	0.4539	0.4922	0.4558	0.368	0.5676	0.245	0.376	0.3565	0.4028	0.3776	0.4197	0.5951	0.3334	0.3732	0.4348	0.4667	0.4189	0.3772	0.2297	0.2266	0.4189	0.4134	0.6001	0.5529	0.5371	0.3712	0.4831	0.5084	0.5087	0.307	0.2526	0.4634	0.2904	0.3869	0.3603	0.2353	0.2747	0.4553	0.4881	0.4747
mv Endothelial cells	0.295	0.268	0.3154	0.2049	0.2418	0.231	0.2221	0.2596	0.3282	0.2354	0.2161	0.2326	0.2659	0.2839	0.344	0.2788	0.3291	0.2525	0.2494	0.2673	0.2063	0.23	0.2296	0.279	0.2667	0.2618	0.2737	0.3681	0.3241	0.2837	0.2577	0.1804	0.2385	0.2203	0.2138	0.242	0.2285	0.2638	0.1885	0.3506	0.2489	0.294	0.233	0.2749	0.3653	0.3262	0.2706	0.1902	0.2206
Chondrocytes	0.166	0.1176	0.2739	0.2989	0.2745	0.2656	0.1237	0.2015	0.2893	0.1144	0.2245	0.2218	0.233	0.1744	0.202	0.2409	0.2174	0.1269	0.2098	0.1289	0.1529	0.1793	0.1998	0.1155	0.2515	0.1392	0.192	0.1876	0.202	0.1953	0.2808	0.2122	0.2667	0.2175	0.2705	0.2215	0.2203	0.299	0.1283	0.2541	0.2535	0.2293	0.2447	0.1695	0.1982	0.1743	0.2823	0.1588	0.2282
ImmuneScore	0.0921	0.1323	0.2389	0.073	0.0897	0.6178	0.3056	0.1641	0.2654	0.128	0.0779	0.1679	0.2234	0.2773	0	0.2503	0.0037	0.2796	0.0227	0.3393	0.3538	0.29	0.15	0.0927	0.3033	0.0499	0.1846	0.0331	0.2835	0.2265	0.0623	0.4005	0.2421	0.2617	0.1059	0.308	0.2862	0.2887	0.412	0.0929	0.217	0.0845	0.2271	0.4156	0.0142	0.0229	0.0891	0.2761	0.0595
Monocytes	0.092	0.1387	0.2263	0.0173	0.107	0.5945	0.3056	0.148	0.2637	0.154	0.0354	0.1897	0.1841	0.2766	0	0.283	0	0.3006	0	0.3174	0.351	0.3408	0.0976	0.1056	0.3137	0.0633	0.1965	0.0234	0.2927	0.1999	0.0128	0.345	0.2062	0.2677	0.0413	0.2469	0.2481	0.3232	0.474	0.0975	0.1936	0.0891	0.2023	0.3988	0	0	0.0452	0.2994	0
CLP	0.1033	0.1668	0.1495	0.1301	0.2176	0.1702	0.1746	0.105	0.1334	0.1802	0.0895	0.1998	0.0886	0.1324	0.1277	0.1378	0.1198	0.1299	0.1432	0.0913	0.2248	0.2013	0.1076	0.1688	0.1018	0.1998	0.1203	0.1452	0.0802	0.1234	0.0935	0.1607	0.1713	0.2314	0.1025	0.1249	0.1248	0.1239	0.1884	0.1403	0.1314	0.1524	0.1247	0.1138	0.1092	0.1592	0.1159	0.2048	0.0836
Mesangial cells	0.1244	0.0494	0.0953	0.0626	0.0493	0.081	0.037	0.0813	0.0756	0.0338	0.0717	0.0595	0.1105	0.087	0.0547	0.0636	0.081	0.0753	0.0826	0.0775	0.0659	0.0215	0.0902	0.0112	0.0757	0.0459	0.0815	0.0653	0.0723	0.0976	0.0692	0.0768	0.0695	0.0832	0.0613	0.0716	0.0657	0.0875	0.0359	0.0385	0.0619	0.0467	0.054	0.0748	0.0852	0.0859	0.0897	0.0653	0.0935
aDC	0.141	0.1002	0.3618	0	0.0972	0.0074	0.0203	0.1335	0.1829	0	0.1003	0	0.1286	0.0066	0	0.0463	0.0702	0.077	0	0.0755	0.1801	0.0814	0	0	0	0.0229	0	0.0771	0.1953	0.2769	0	0.1267	0	0	0.1606	0	0	0.0116	0.2462	0.0807	0.0061	0.0328	0.0863	0.0087	0.0441	0	0.077	0	0.0436
MEP	0.0373	0.0798	0.0705	0.0685	0.0889	0.0678	0.0936	0.056	0.0426	0.0533	0.0788	0.0508	0.0634	0.0617	0.0604	0.0461	0.1051	0.055	0.0971	0.0479	0.0892	0.1469	0.0785	0.0616	0.0227	0.0678	0.0551	0.0536	0.0542	0.0831	0.0526	0.0889	0.0616	0.0875	0.0951	0.1042	0.0856	0.0629	0.1591	0.0812	0.0585	0.0649	0.0683	0.0262	0.0614	0.0486	0.0583	0.0458	0.0805
cDC	0.0236	0.0605	0.0842	0.0252	0.0167	0.0108	0.0333	0.0865	0.0277	0	0.1063	0.0176	0.1352	0.0539	0.0193	0.0063	0.0115	0.0266	0.0342	0.1529	0.0999	0.0686	0.0664	0	0.0211	0.0092	0.0233	0.0125	0.1285	0.0895	0.055	0.105	0.0784	0.0266	0.0474	0.1528	0	0.0262	0.0774	0.1079	0.0795	0.0445	0.1522	0.0147	0.0223	0.01	0.0749	0.0098	0.0773
Macrophages M2	0.04	0.0702	0.0765	0.0067	0.0617	0.0446	0.0395	0.0444	0.0572	0.0477	0.014	0.047	0.0856	0.0523	0	0.0529	0.0042	0.0745	0.001	0.125	0.0413	0.0717	0.0676	0.0152	0.0505	0.0212	0.0345	0.0218	0.0988	0.1179	0.0102	0.1498	0.047	0.041	0.0302	0.032	0.0235	0.052	0.0704	0.0211	0.0312	0.0336	0.0681	0.0303	0.0186	0.0142	0.0176	0.0431	0
Astrocytes	0	0	0.0844	0.0534	0.0512	0.1156	0	0	0.0519	0	0.1244	0.0224	0.1044	0.0752	0.0293	0.0177	0.0623	0	0.1379	0.018	0.104	0.0109	0.0459	0	0	0	0.0197	0	0.0106	0	0.0964	0.0262	0	0.032	0.0409	0.0553	0.0541	0.1304	0.0731	0.0503	0	0.0697	0.0404	0.004	0.1254	0.0013	0.0955	0.0243	0.1534
Neutrophils	0.0053	0.0163	0.0063	0.0636	0.0078	0.3136	0.1449	0.0089	0.1169	0.0371	0.0146	0.0489	0.0046	0.0638	0	0.0772	0	0.0731	0	0.0266	0.048	0.0262	0.0152	0.0335	0.1055	0.0115	0.0272	0.018	0	0.0264	0.009	0.157	0.1117	0.0711	0.0092	0.0258	0.1489	0.054	0.0288	0.0316	0.0707	0.0089	0.0092	0.2027	0	0.0301	0.009	0.0857	0.004
DC	0.0206	0.0106	0.0847	0.0034	0	0.0186	0.0001	0.0731	0	0.0009	0.0481	0.0131	0.0988	0.0499	0	0.0106	0	0.0233	0.0245	0.1133	0.1099	0.035	0.0885	0	0.0338	0	0.033	0	0.0754	0.0421	0.046	0.0566	0.0362	0.0385	0.068	0.1506	0.0213	0.0384	0.0922	0.0102	0.0582	0.0232	0.0966	0.0219	0.0099	0	0.0521	0.029	0.0513
Basophils	0.127	0.008	0	0.0785	0	0.0631	0.0041	0.0455	0.0304	0.0573	0	0.0123	0	0.0464	0	0.0752	0	0.0311	0	0	0.0624	0.0626	0	0.0357	0.0965	0	0	0	0	0.0246	0	0.0801	0.0295	0.1172	0.056	0.0393	0.004	0.0382	0.1417	0	0.0472	0.0002	0.0382	0.1107	0	0	0.0602	0.0787	0.0384
NKT	0.004	0.0682	0	0	0.049	0.0504	0.0952	0.06	0.0647	0.0814	0	0.0989	0	0	0	0.087	0	0.033	0	0.0095	0.0774	0.0573	0	0.1139	0	0.0963	0.106	0	0.0526	0	0	0.0563	0.0565	0.0571	0	0.0239	0.1388	0	0.0533	0	0	0	0.0301	0	0	0	0	0.0229	0
Megakaryocytes	0.0236	0.0323	0.0323	0.0343	0.0199	0.0504	0.015	0.0227	0.0431	0.0121	0.0274	0.0227	0.0264	0.0488	0.0391	0.0385	0.035	0.0171	0.0241	0.024	0.0225	0.0142	0.0243	0.0271	0.0271	0.0318	0.0187	0.0845	0.0181	0.0404	0.019	0.0161	0.0283	0.0341	0.0428	0.0261	0.0223	0.0408	0.0087	0.0612	0.0369	0.0383	0.0257	0.0462	0.0381	0.0652	0.0355	0.0162	0.0241
MSC	0.0779	0	0.1633	0	0	0	0.1408	0	0	0.1247	0	0.0463	0	0	0.0627	0	0	0	0	0.0329	0	0.1945	0.048	0.3143	0	0.0632	0	0	0	0	0	0	0	0	0	0.0515	0.0485	0	0.2085	0	0	0	0	0.0491	0.134	0	0	0	0
Epithelial cells	0.0069	0.0189	0.0137	0.0096	0.0162	0.0205	0.0163	0.009	0.0073	0.0138	0.0059	0.0155	0.0031	0.0193	0.0073	0.0064	0.0064	0.0047	0.0266	0.0208	0.0277	0.0132	0.0239	0.0225	0.0182	0.017	0.0463	0.0033	0.0004	0	0.0259	0.0027	0.0257	0.0246	0.0215	0.0211	0.0176	0.0224	0.0241	0.0072	0.0213	0.0127	0.0164	0.0174	0.013	0.0568	0.0198	0.0136	0.0179
Th1 cells	0.0033	0.0572	0.0418	0	0.0375	0.0012	0.045	0.0313	0	0.0218	0	0.0107	0.0117	0.0073	0.0004	0.0056	0	0.0207	0	0.0106	0.0374	0.0653	0.0077	0.0363	0	0.0412	0.0181	0.0135	0.0189	0.0192	0.0165	0	0	0.0282	0.025	0.0222	0.0138	0	0.1032	0	0.0018	0.0227	0.0165	0	0	0.005	0	0.0089	0.0075
Osteoblast	0	0.1499	0	0	0.1426	0	0.0825	0	0	0.0024	0	0.0371	0.0185	0	0	0	0	0.0857	0	0	0	0.0643	0	0	0	0.0529	0	0	0	0	0	0	0	0	0	0	0	0	0	0	0	0	0.0279	0	0	0	0	0.0321	0
GMP	0	0	0	0.0526	0	0	0	0	0.0212	0	0.0623	0	0.0336	0.014	0.012	0	0.0098	0	0.0165	0	0	0	0	0	0	0	0	0	0.1345	0.0258	0	0.0071	0	0	0	0.0031	0	0	0	0.0312	0	0	0	0	0.0038	0	0	0	0.006
Eosinophils	0.0202	0	0.0016	0.0252	0	0	0	0.0132	0.0175	0	0.0048	0.0001	0.0152	0.0257	0	0.0047	0.0056	0	0.0096	0	0.0154	0	0.0237	0	0.002	0	0.0202	0.0083	0.028	0.0187	0.0256	0	0.0091	0.0152	0.0185	0.02	0.011	0.0174	0	0	0	0.0055	0	0	0.0114	0.0043	0.0273	0	0.0308
CD8+ Tcm	0.0414	0	0	0	0	0	0	0.0188	0	0	0.0062	0	0.0295	0	0.0082	0	0.036	0	0	0	0	0	0	0	0	0	0	0	0.0196	0	0	0.055	0	0	0.045	0	0	0	0	0	0	0.031	0	0.0106	0	0	0	0	0.0066
Macrophages	0	0.0329	0.0395	0	0.0197	0	0.0078	0.003	0	0	0	0	0.0163	0	0	0	0	0.0193	0	0.0429	0.0064	0.033	0	0	0	0	0	0	0.0291	0.0526	0	0.0349	0	0	0	0	0	0	0.023	0	0	0	0.0311	0	0	0	0	0	0
CD4+ Tcm	0.113	0	0	0	0	0	0	0.001	0	0	0	0	0.0147	0.0053	0	0	0.0055	0	0	0.003	0	0	0.0187	0	0	0	0	0.0043	0.0101	0	0.0167	0.0193	0	0	0.067	0	0	0	0	0	0.0268	0.0199	0	0	0	0	0	0	0.0039
Myocytes	0	0	0.0137	0	0.0154	0	0.0294	0	0.0186	0.0085	0	0.0217	0.0035	0.0064	0	0.0106	0.0035	0	0	0.0034	0.0089	0	0	0	0.0017	0.0012	0.0011	0.0109	0	0	0.0013	0	0.0142	0.0062	0.0011	0.004	0.0104	0.0279	0.0119	0.0051	0	0	0	0	0	0	0	0.0121	0
Th2 cells	0.0098	0.0225	0.0066	0	0	0	0.0062	0.0136	0	0	0.0369	0	0.0036	0.0238	0	0	0.0095	0.0251	0	0.0127	0.002	0.0628	0	0	0	0	0.0032	0	0	0	0	0.0511	0	0	0	0	0	0	0.0057	0	0.0021	0.0056	0	0	0	0	0	0	0
Hepatocytes	0.0085	0	0.0073	0.0116	0	0.0038	0.0003	0.0001	0.0165	0	0.0071	0.003	0	0.0067	0	0.0048	0.007	0	0.0008	0	0	0	0.0036	0	0.0084	0	0.0137	0.0039	0	0	0.0013	0	0.0075	0.0027	0.0058	0	0.008	0.017	0	0	0.0094	0.0026	0.0021	0	0	0.0074	0.0108	0.0002	0.0097
B-cells	0	0	0	0	0	0	0	0	0	0	0	0	0	0	0	0	0	0	0	0	0	0	0	0	0	0	0	0	0	0	0	0	0	0	0.0084	0	0	0	0	0	0	0	0	0	0	0	0	0	0
Skeletal muscle	0.0112	0	0.0037	0.0091	0.0101	0.0102	0.0121	0	0	0	0	0.0057	0	0.0042	0.0044	0	0.0017	0	0.008	0.0017	0	0.0034	0.0067	0	0	0	0	0	0.0003	0	0.0027	0	0	0	0.0019	0.0038	0.0109	0.0091	0.0037	0	0	0	0.0051	0.0071	0.0136	0.0015	0	0	0.0027
Melanocytes	0.0082	0.0065	0.0071	0.0028	0.0044	0.0088	0.0057	0	0	0.0086	0	0.0081	0	0	0.0059	0	0	0	0.0023	0.0045	0	0.0095	0.0065	0.0041	0	0.0053	0	0	0.0076	0	0	0.0038	0	0	0	0.0036	0.0049	0.0021	0.0097	0	0	0	0.0084	0.0056	0.0122	0.0039	0	0	0
Class-switched memory B-cells	0	0	0	0	0	0	0	0	0	0	0	0	0	0	0	0	0	0	0	0	0	0	0	0	0	0	0	0	0.0057	0	0	0.0011	0	0	0.0165	0	0	0	0	0	0	0	0	0	0	0	0	0	0
CD8+ Tem	0.0067	0	0	0	0	0	0	0.0216	0	0	0	0	0.0134	0	0	0	0.0287	0	0	0	0	0	0	0	0	0	0	0	0.0165	0	0.009	0	0	0	0.0104	0	0	0	0	0	0	0.001	0	0	0	0	0	0	0
CD4+ naive T-cells	0.0191	0	0	0	0	0	0	0.0303	0	0	0	0	0.0238	0	0	0	0	0	0	0.0206	0	0	0	0	0	0	0	0	0.0469	0	0	0	0	0	0.0401	0	0	0	0	0	0	0	0	0	0	0	0	0	0
Macrophages M1	0	0.0164	0.0099	0	0.0119	0	0	0	0	0	0	0.0039	0	0	0	0	0	0	0	0	0.0132	0.0156	0	0	0	0.0026	0	0	0	0.0089	0	0	0	0.0065	0	0	0	0	0.0098	0	0	0	0.0028	0	0	0	0	0	0
Neurons	0.002	0.0001	0.0006	0.0057	0.0025	0.0016	0.0013	0.0009	0.0039	0.0017	0.002	0.0022	0.0009	0.0014	0.0039	0.0022	0.0029	0.0011	0.0037	0.0009	0.0015	0.001	0.0016	0.0021	0.0017	0.0021	0.0016	0.0036	0.0012	0.0016	0.0033	0.001	0.0022	0.0015	0.0016	0.0014	0.0012	0.0027	0.0005	0.0022	0.0014	0.0023	0.001	0.0015	0.0025	0.0037	0.0036	0.0018	0.0036
Pericytes	0.0022	0	0	0	0	0	0	0	0.0289	0	0	0	0	0	0	0	0	0	0	0	0	0	0	0	0	0	0	0	0	0	0	0	0	0	0	0	0	0.0269	0	0	0	0	0	0	0	0	0	0	0
CMP	0	0	0	0.0037	0	0	0	0	0	0	0.0199	0	0.0053	0	0	0	0.0065	0	0.0046	0	0	0	0	0	0	0	0	0	0	0.0081	0	0	0	0	0.0004	0.0051	0	0	0	0.002	0	0	0	0	0.003	0	0.0032	0	0.0171
Mast cells	0	0	0	0	0	0	0	0	0	0	0.0139	0	0.0161	0	0	0	0	0.0031	0	0.0087	0	0	0	0	0	0	0	0	0	0	0	0.0072	0	0	0.0037	0.0187	0	0	0	0	0.003	0	0.0015	0	0	0	0	0	0.0032
Memory B-cells	0	0	0	0	0	0	0	0	0	0	0	0	0	0	0	0	0	0	0	0	0	0	0	0	0	0	0	0	0	0	0	0	0	0	0.011	0	0	0	0	0	0	0	0	0	0	0	0	0	0
Plasma cells	0.02	0.0005	0	0	0	0	0	0	0	0	0	0	0	0	0	0	0	0	0	0.0036	0	0	0	0	0	0	0	0	0	0	0	0	0	0	0.0136	0	0	0	0	0	0	0	0	0	0	0	0	0	0
CD8+ naive T-cells	0.0146	0	0	0	0	0	0	0	0	0	0	0	0.0048	0	0.0032	0	0.0008	0	0	0	0	0	0.0017	0	0	0	0	0	0	0	0.0021	0.0066	0	0.001	0.0011	0	0	0	0	0	0	0.0056	0	0	0	0	0	0	0.0028
Tregs	0	0	0	0	0	0	0	0	0	0	0	0	0	0.004	0	0	0	0	0	0	0	0	0	0	0	0	0	0	0	0	0	0.036	0	0	0	0	0	0	0	0	0	0	0	0	0	0	0	0	0
naive B-cells	0	0	0	0	0	0	0	0	0	0	0	0	0	0	0	0	0	0	0	0	0	0	0	0	0	0	0	0	0	0	0	0	0	0	0.0137	0	0	0	0	0	0	0	0	0	0	0	0	0	0
Keratinocytes	0	0	0	0	0	0	0	0	0	0	0	0	0	0.0002	0	0	0	0	0	0	0.0056	0	0	0.0013	0	0	0.0092	0	0	0	0	0	0.0028	0.0005	0	0	0.0002	0.0014	0.0014	0	0	0	0	0	0	0.0133	0	0.0004	0
CD8+ T-cells	0	0	0	0	0	0	0	0	0	0	0	0	0	0	0	0	0	0	0	0	0	0	0	0	0	0	0	0	0	0	0	0	0	0	0.0097	0	0	0	0	0	0	0	0	0	0	0	0	0	0
CD4+ memory T-cells	0.0126	0	0	0	0	0	0	0	0	0	0	0	0	0	0	0	0	0	0	0	0	0	0	0	0	0	0	0	0	0	0	0	0	0	0	0	0	0	0	0	0	0	0	0	0	0	0	0	0
Sebocytes	0	0	0	0	0	0	0	0	0	0	0	0	0	0	0	0	0	0	0	0	0	0	0	0	0	0	0	0	0	0	0	0	0	0	0	0	0	0	0.001	0	0	0	0	0	0	0.0047	0	0	0
CD4+ Tem	0	0	0	0	0	0	0	0	0	0	0	0	0	0	0	0	0	0	0	0	0	0	0	0	0	0	0	0	0	0	0	0.0082	0	0	0	0	0	0	0	0	0	0	0	0	0	0	0	0	0
Erythrocytes	0	0	0	0.0006	0	0	0	0	0	0	0	0	0	0	0	0	0	0	0	0	0	0	0	0	0	0	0	0	0	0	0	0	0	0	0	0	0	0	0	0	0	0	0	0	0	0	0	0	0
pDC	0	0	0	0	0	0	0	0	0	0	0	0	0	0	0	0	0	0	0	0	0	0	0	0	0	0	0	0	0	0	0	0	0	0	0	0	0	0	0	0	0	0	0	0	0	0	0	0	0
CD4+ T-cells	0	0	0	0	0	0	0	0	0	0	0	0	0	0	0	0	0	0	0	0	0	0	0	0	0	0	0	0	0	0	0	0	0	0	0	0	0	0	0	0	0	0	0	0	0	0	0	0	0
MPP	0	0	0	0	0	0	0	0	0	0	0	0	0	0	0	0	0	0	0	0	0	0	0	0	0	0	0	0	0	0	0	0	0	0	0	0	0	0	0	0	0	0	0	0	0	0	0	0	0
NK cells	0	0	0	0	0	0	0	0	0	0	0	0	0	0	0	0	0	0	0	0	0	0	0	0	0	0	0	0	0	0	0	0	0	0	0	0	0	0	0	0	0	0	0	0	0	0	0	0	0
Platelets	0	0	0	0	0	0	0	0	0	0	0	0	0	0	0	0	0	0	0	0	0	0	0	0	0	0	0	0	0	0	0	0	0	0	0	0	0	0	0	0	0	0	0	0	0	0	0	0	0
Tgd cells	0	0	0	0	0	0	0	0	0	0	0	0	0	0	0	0	0	0	0	0	0	0	0	0	0	0	0	0	0	0	0	0	0	0	0	0	0	0	0	0	0	0	0	0	0	0	0	0	0
pro B-cells	0	0	0	0	0	0	0	0	0	0	0	0	0	0	0	0	0	0	0	0	0	0	0	0	0	0	0	0	0	0	0	0	0	0	0	0	0	0	0	0	0	0	0	0	0	0	0	0	0
[truncated: 65 more columns]
