# Supplementary material for: The Transcriptomic Landscape of Age-Induced Changes in Human Visceral Fat and the Predicted Omentum-Liver Connectome in Males
Source: Biomedicines. 2023 May 14;11(5):1446. doi: 10.3390/biomedicines11051446 (PMC10216224; doi:10.3390/biomedicines11051446)
Supplement: Supplementary file 1 [file biomedicines-11-01446-s001.zip › Material_S6.xlsx]

## Sheet: GWAS_Catalog
ADIPOQ	PMID	LPL	PMID	FCN2	PMID	IL1RN	PMID	TF	PMID	IGF1	PMID	VEGFA	PMID	CXCL10	PMID	ASIP	PMID	LIPC	PMID	IFNG	PMID	ADIPOR2	PMID	MGRN1	PMID	SDC1	PMID	TFR2	PMID	ADIPOR1	PMID	F11R	PMID	SDC4	PMID	LRP1	PMID	IFNGR1	PMID	INSR1	PMID	IL1R1	PMID	ITGB1	PMID	GPC1	PMID
Adiponectin levels (BMI-adjusted)	26299439					Total cholesterol levels	30498476	HDL cholesterol	23505323	Fasting blood insulin	20081858	Abdominal adipose tissue volumes (adjusted for BMI and height)	35773277			C-reactive protein levels or LDL-cholesterol levels (pleiotropy)	27286809			BMI (adjusted for smoking behaviour)	28443625			HDL cholesterol	23505323	Hip circumference adjusted for BMI	25673412	Cholesterol levels in IDL	35213538	Subcutaneous adipose tissue	22589738			High density lipoprotein cholesterol levels	30498476	Aging	22773346	BMI (adjusted for smoking behaviour)	28443625							BMI x SSRI levels interaction in schizophrenia or bipolar disorder	33824429
								HDL cholesterol levels	17463246	Fasting blood insulin (BMI interaction)	22581228	Abdominal adipose tissue volumes to gluteofemoral adipose tissue volumes ratio	35773277			LDL cholesterol levels x long total sleep time interaction (2df test)	31719535							HDL cholesterol levels	17463246	Sex hormone-binding globulin levels adjusted for BMI	32042192	Cholesterol levels in large LDL	35213538					Non-HDL cholesterol levels	34887591	Fasting glucose	34610981
								High density lipoprotein cholesterol levels	30498476	Fasting glucose	34610981	Blood glucose levels	31928498			Total cholesterol levels	30498476							High density lipoprotein cholesterol levels	30498476			Clinical LDL cholesterol levels	35213538							Glucagon levels in response to oral glucose tolerance test (120 minutes)	33407418
								Low density lipoprotein cholesterol levels	30498476	Fasting insulin	33402679	Cholesterol levels in chylomicrons and extremely large VLDL	35213538			Waist-to-hip ratio adjusted for BMI (additive genetic model)	30778226							Sex hormone-binding globulin levels adjusted for BMI	32042192			Free cholesterol levels in IDL	29084231							Healthy aging	35927272
								Total cholesterol levels	30498476	Fasting plasma glucose	20152958	Cholesterol levels in large HDL	35213538															Free cholesterol levels in large LDL	29084231							High density lipoprotein cholesterol levels	30498476
										Glucagon levels in response to oral glucose tolerance test (fasting)	33407418	Cholesterol levels in large VLDL	35213538															Free cholesterol levels in LDL	35213538							Parental longevity (father's age at death or father's attained age)	31484785
										High density lipoprotein cholesterol levels	30498476	Cholesterol levels in medium HDL	35213538															Free cholesterol levels in medium LDL	35213538							Parental longevity (mother's age at death)	27015805
										Hip circumference adjusted for BMI	25673412	Cholesterol levels in very large HDL	35213538															Free cholesterol levels in small LDL	35213538
										Homeostasis model assessment of insulin resistance	20081858	Cholesterol levels in very large VLDL	35213538															LDL cholesterol	18802019
										Insulin-like growth factor 1 levels	33462484	Cholesterol to total lipids ratio in IDL	35213538															LDL cholesterol levels	17463246
										Insulin-related traits (multivariate analysis)	32002517	Cholesterol to total lipids ratio in large HDL	35213538															Low density lipoprotein cholesterol levels	30498476
										Low density lipoprotein cholesterol levels	30498476	Cholesterol to total lipids ratio in medium HDL	35213538															Phospholipid levels in large LDL	27005778
										Sex hormone-binding globulin levels adjusted for BMI	32042192	Cholesterol to total lipids ratio in medium VLDL	35213538															Phospholipid levels in LDL	35213538
										Total cholesterol levels	30498476	Cholesterol to total lipids ratio in small VLDL	35213538															Total lipid levels in large LDL	35213538
										Waist-to-hip ratio adjusted for BMI	30239722	Cholesterol to total lipids ratio in very large VLDL	35213538
												Cholesterol to total lipids ratio in very small VLDL	35213538
												Cholesteryl esters to total lipids ratio in large HDL	35213538
												Cholesteryl esters to total lipids ratio in large VLDL	35213538
												Cholesteryl esters to total lipids ratio in medium HDL	35213538
												Cholesteryl esters to total lipids ratio in medium VLDL	35213538
												Cholesteryl esters to total lipids ratio in very large VLDL	35213538
												Cholesteryl esters to total lipids ratio in very small VLDL	35213538
												Familial combined hyperlipidemia defined by Consensus criteria	34906840
												Familial combined hyperlipidemia defined by Dutch criteria	34906840
												Familial combined hyperlipidemia defined by Mexico criteria	34906840
												Fasting insulin	33402679
												Free cholesterol levels in chylomicrons and extremely large VLDL	35213538
												Free cholesterol levels in HDL	35213538
												Free cholesterol levels in large HDL	29084231
												Free cholesterol levels in large VLDL	35213538
												Free cholesterol levels in medium HDL	29084231
												Free cholesterol levels in very large HDL	29084231
												Free cholesterol levels in very large VLDL	35213538
												Free cholesterol levels in VLDL	35213538
												Free cholesterol to total lipids ratio in IDL	35213538
												Free cholesterol to total lipids ratio in large HDL	35213538
												Free cholesterol to total lipids ratio in large LDL	35213538
												Free cholesterol to total lipids ratio in medium HDL	35213538
												Free cholesterol to total lipids ratio in medium LDL	35213538
												Free cholesterol to total lipids ratio in medium VLDL	35213538
												Free cholesterol to total lipids ratio in small LDL	35213538
												Free cholesterol to total lipids ratio in small VLDL	35213538
												Free cholesterol to total lipids ratio in very large HDL	35213538
												Free cholesterol to total lipids ratio in very large VLDL	35213538
												Free cholesterol to total lipids ratio in very small VLDL	35213538
												Glucose levels	27005778
												Gluteofemoral adipose tissue volumes	35773277
												Gluteofemoral adipose tissue volumes (adjusted for BMI and height)	35773277
												HDL cholesterol	23505323
												HDL cholesterol levels	17463246
												HDL cholesterol levels in current drinkers	30698716
												HDL cholesterol levels x alcohol consumption (drinkers vs non-drinkers) interaction (2df)	30698716
												HDL cholesterol levels x alcohol consumption (regular vs non-regular drinkers) interaction (2df)	30698716
												HDL cholesterol levels x short total sleep time interaction (2df test)	31719535
												High density lipoprotein cholesterol levels	30498476
												Hip circumference adjusted for BMI	25673412
												Low density lipoprotein cholesterol levels	30498476
												Non-HDL cholesterol levels	34887591
												Phospholipid levels in chylomicrons and extremely large VLDL	35213538
												Phospholipid levels in large HDL	29084231
												Phospholipid levels in large VLDL	29084231
												Phospholipid levels in very large HDL	27005778
												Phospholipid levels in very large VLDL	29084231
												Phospholipid levels in VLDL	35213538
												Phospholipids to total lipids ratio in large HDL	32150548
												Phospholipids to total lipids ratio in large VLDL	35213538
												Phospholipids to total lipids ratio in medium HDL	35213538
												Phospholipids to total lipids ratio in medium VLDL	35213538
												Phospholipids to total lipids ratio in small VLDL	35213538
												Phospholipids to total lipids ratio in very large HDL	35213538
												Predicted visceral adipose tissue	31501611
												Sex hormone-binding globulin levels adjusted for BMI	32042192
												Total cholesterol levels	30498476
												Total lipid levels in chylomicrons and extremely large VLDL	35213538
												Total lipid levels in HDL	35213538
												Total lipid levels in large HDL	35213538
												Total lipid levels in large VLDL	35213538
												Total lipid levels in medium VLDL	35213538
												Total lipid levels in small VLDL	35213538
												Total lipid levels in very large HDL	35213538
												Total lipid levels in very large VLDL	35213538
												Total lipid levels in VLDL	35213538
												Triglycerides to total lipids ratio in IDL	35213538
												Triglycerides to total lipids ratio in large HDL	35213538
												Triglycerides to total lipids ratio in medium HDL	35213538
												Triglycerides to total lipids ratio in medium VLDL	35213538
												Triglycerides to total lipids ratio in small HDL	35213538
												Triglycerides to total lipids ratio in small LDL	35213538
												Triglycerides to total lipids ratio in small VLDL	35213538
												Triglycerides to total lipids ratio in very large HDL	35213538
												Triglycerides to total lipids ratio in very large VLDL	35213538
												Triglycerides to total lipids ratio in very small VLDL	32150548
												Visceral adipose tissue volumes (adjusted for BMI and height)	35773277
												Visceral adipose tissue volumes to abdominal adipose tissue volumes ratio	35773277
												Visceral adipose tissue volumes to gluteofemoral adipose tissue volumes ratio	35773277
												Waist circumference adjusted for BMI (adjusted for smoking behaviour)	28443625
												Waist circumference adjusted for BMI (joint analysis main effects and physical activity interaction)	28448500
												Waist circumference adjusted for BMI (joint analysis main effects and smoking interaction)	28443625
												Waist circumference adjusted for BMI in active individuals	28448500
												Waist circumference adjusted for BMI in inactive individuals	28448500
												Waist circumference adjusted for BMI in non-smokers	28443625
												Waist-to-hip ratio adjusted for BMI	30239722
												Waist-to-hip ratio adjusted for BMI (adjusted for smoking behaviour)	28443625
												Waist-to-hip ratio adjusted for BMI (age <50)	26426971
												Waist-to-hip ratio adjusted for BMI (age >50)	26426971
												Waist-to-hip ratio adjusted for BMI (joint analysis for main effect and physical activity interaction)	28448500
												Waist-to-hip ratio adjusted for BMI (joint analysis main effects and smoking interaction)	28443625
												Waist-to-hip ratio adjusted for BMI in active individuals	28448500
												Waist-to-hip ratio adjusted for BMI in non-smokers	28443625
												Waist-to-hip ratio adjusted for BMI x sex interaction	26426971
												Waist-to-hip ratio adjusted for BMI x sex x age interaction (4df test)	26426971

## Sheet: Gene_Age
ADIPOQ	PMID	LPL	PMID	FCN2	PMID	IL1RN	PMID	TF	PMID	IGF1	PMID	VEGFA	PMID	CXCL10	PMID	ASIP	PMID	LIPC	PMID	IFNG	PMID	ADIPOR2	PMID	MGRN1	PMID	SDC1	PMID	TFR2	PMID	ADIPOR1	PMID	F11R	PMID	SDC4	PMID	LRP1	PMID	IFNGR1	PMID	INSR1	PMID	IL1R1	PMID	ITGB1	PMID	GPC1	PMID
Longevity	22496539											Longevity	17574707							Longevity	11857058													Longevity	26254886
Longevity	20201642																			Longevity	11772518
