# Supplementary material for: The Transcriptomic Landscape of Age-Induced Changes in Human Visceral Fat and the Predicted Omentum-Liver Connectome in Males
Source: Biomedicines. 2023 May 14;11(5):1446. doi: 10.3390/biomedicines11051446 (PMC10216224; doi:10.3390/biomedicines11051446)
Supplement: Supplementary file 1 [file biomedicines-11-01446-s001.zip › Material_S7.xlsx]

## Sheet: Sheet1
gene name	Gene Ensembl ID	Cluster	Eigenvector centrality (STRING, A+B+C and I)
ADAM12	ENSG00000148848	D	Not used as input
ADAM23	ENSG00000114948	H	Not used as input
ADAMTS6	ENSG00000049192	g	Not used as input
ADAMTSL2	ENSG00000197859	J	Not used as input
ADORA1	ENSG00000163485	K	Not used as input
AEBP1	ENSG00000106624	J	Not used as input
AGPS	ENSG00000018510	D	Not used as input
AIM2	ENSG00000163568	g	Not used as input
AK4	ENSG00000162433	K	Not used as input
AKNAD1	ENSG00000162641	H	Not used as input
ALDOC	ENSG00000109107	E	Not used as input
ALOX15	ENSG00000161905	J	Not used as input
AMN	ENSG00000166126	D	Not used as input
ANGPTL5	ENSG00000187151	H	Not used as input
ANKFN1	ENSG00000153930	K	Not used as input
ANKRD30A	ENSG00000148513	H	Not used as input
AOAH	ENSG00000136250	F	Not used as input
APOBEC3B	ENSG00000179750	J	Not used as input
ARAP2	ENSG00000047365	J	Not used as input
ARHGEF25	ENSG00000240771	J	Not used as input
ARMC4	ENSG00000169126	J	Not used as input
ATF3	ENSG00000162772	K	Not used as input
AURKB	ENSG00000178999	g	Not used as input
AVEN	ENSG00000169857	D	Not used as input
BCAR3	ENSG00000137936	J	Not used as input
BMPR1B	ENSG00000138696	J	Not used as input
BPIFB2	ENSG00000078898	F	Not used as input
C12orf75	ENSG00000235162	J	Not used as input
C1orf115	ENSG00000162817	F	Not used as input
C1orf127	ENSG00000175262	g	Not used as input
C1QTNF2	ENSG00000145861	J	Not used as input
C1S	ENSG00000182326	J	Not used as input
C2	ENSG00000166278	J	Not used as input
C20orf141	ENSG00000258713	D	Not used as input
C3orf80	ENSG00000180044	F	Not used as input
C4BPB	ENSG00000123843	g	Not used as input
C5orf49	ENSG00000215217	K	Not used as input
C7orf57	ENSG00000164746	K	Not used as input
C8orf76	ENSG00000189376	F	Not used as input
CA3	ENSG00000164879	K	Not used as input
CA4	ENSG00000167434	F	Not used as input
CADM2	ENSG00000175161	F	Not used as input
CALB2	ENSG00000172137	J	Not used as input
CALCR	ENSG00000004948	g	Not used as input
CALD1	ENSG00000122786	J	Not used as input
CAT	ENSG00000121691	F	Not used as input
CCBE1	ENSG00000183287	J	Not used as input
CCDC8	ENSG00000169515	J	Not used as input
CCL13	ENSG00000181374	g	Not used as input
CCL17	ENSG00000102970	J	Not used as input
CCL19	ENSG00000172724	H	Not used as input
CCL22	ENSG00000102962	F	Not used as input
CCL5	ENSG00000161570	H	Not used as input
CCR6	ENSG00000112486	F	Not used as input
CD1C	ENSG00000158481	F	Not used as input
CD1E	ENSG00000158488	F	Not used as input
CD3D	ENSG00000167286	H	Not used as input
CD3E	ENSG00000198851	H	Not used as input
CD5	ENSG00000110448	H	Not used as input
CD69	ENSG00000110848	H	Not used as input
CD83	ENSG00000112149	K	Not used as input
CDH3	ENSG00000062038	J	Not used as input
CDHR4	ENSG00000187492	J	Not used as input
CDKN2B	ENSG00000147883	F	Not used as input
CDS1	ENSG00000163624	J	Not used as input
CEACAM1	ENSG00000079385	F	Not used as input
CENPA	ENSG00000115163	E	Not used as input
CENPM	ENSG00000100162	g	Not used as input
CEP55	ENSG00000138180	g	Not used as input
CHAC1	ENSG00000128965	K	Not used as input
CHD3	ENSG00000170004	J	Not used as input
CHIT1	ENSG00000133063	F	Not used as input
CHRNA1	ENSG00000138435	F	Not used as input
CLASP2	ENSG00000163539	E	Not used as input
CLDN1	ENSG00000163347	J	Not used as input
CLDN4	ENSG00000189143	g	Not used as input
CLEC18A	ENSG00000157322	K	Not used as input
CLECL1	ENSG00000184293	g	Not used as input
CNGA3	ENSG00000144191	J	Not used as input
COL1A1	ENSG00000108821	J	Not used as input
COL22A1	ENSG00000169436	J	Not used as input
COL7A1	ENSG00000114270	F	Not used as input
COLEC11	ENSG00000118004	H	Not used as input
COMP	ENSG00000105664	J	Not used as input
COQ2	ENSG00000173085	D	Not used as input
CPNE5	ENSG00000124772	J	Not used as input
CPXM1	ENSG00000088882	K	Not used as input
CPZ	ENSG00000109625	J	Not used as input
CRABP2	ENSG00000143320	J	Not used as input
CRISPLD1	ENSG00000121005	J	Not used as input
CRTAC1	ENSG00000095713	D	Not used as input
CRTAM	ENSG00000109943	H	Not used as input
CSAD	ENSG00000139631	F	Not used as input
CTGF	ENSG00000118523	F	Not used as input
CXCL13	ENSG00000156234	K	Not used as input
CXCL9	ENSG00000138755	H	Not used as input
CXCR3	ENSG00000186810	g	Not used as input
CXCR6	ENSG00000172215	D	Not used as input
CYP1A1	ENSG00000140465	E	Not used as input
DBH	ENSG00000123454	J	Not used as input
DCSTAMP	ENSG00000164935	E	Not used as input
DEFB132	ENSG00000186458	E	Not used as input
DHDH	ENSG00000104808	K	Not used as input
DIRAS1	ENSG00000176490	K	Not used as input
DLEU7	ENSG00000186047	g	Not used as input
DLX3	ENSG00000064195	F	Not used as input
DLX6	ENSG00000006377	J	Not used as input
DNASE2B	ENSG00000137976	g	Not used as input
DPEP1	ENSG00000015413	J	Not used as input
DPEP2	ENSG00000167261	F	Not used as input
DPEP3	ENSG00000141096	E	Not used as input
DPP10	ENSG00000175497	J	Not used as input
DPYS	ENSG00000147647	J	Not used as input
EDEM2	ENSG00000088298	D	Not used as input
EFCAB7	ENSG00000203965	J	Not used as input
ELOVL6	ENSG00000170522	K	Not used as input
EN2	ENSG00000164778	K	Not used as input
ENTPD2	ENSG00000054179	F	Not used as input
EPHA5	ENSG00000145242	J	Not used as input
EPHA7	ENSG00000135333	K	Not used as input
EPHB3	ENSG00000182580	J	Not used as input
EPHX4	ENSG00000172031	H	Not used as input
ERC2	ENSG00000187672	J	Not used as input
ESPNL	ENSG00000144488	J	Not used as input
ESRP2	ENSG00000103067	D	Not used as input
ETV7	ENSG00000010030	J	Not used as input
EYA4	ENSG00000112319	J	Not used as input
F12	ENSG00000131187	K	Not used as input
F2RL2	ENSG00000164220	H	Not used as input
F2RL3	ENSG00000127533	J	Not used as input
FAM153B	ENSG00000182230	J	Not used as input
FAM180B	ENSG00000196666	H	Not used as input
FAM19A3	ENSG00000184599	J	Not used as input
FAM83G	ENSG00000188522	K	Not used as input
FAM92B	ENSG00000153789	J	Not used as input
FAP	ENSG00000078098	J	Not used as input
FFAR2	ENSG00000126262	F	Not used as input
FFAR3	ENSG00000185897	F	Not used as input
FGF9	ENSG00000102678	J	Not used as input
FGFR4	ENSG00000160867	E	Not used as input
FLNC	ENSG00000128591	K	Not used as input
FOXRED1	ENSG00000110074	D	Not used as input
FRMD5	ENSG00000171877	K	Not used as input
GABRP	ENSG00000094755	E	Not used as input
GALR1	ENSG00000166573	K	Not used as input
GAPT	ENSG00000175857	F	Not used as input
GBP5	ENSG00000154451	g	Not used as input
GBP7	ENSG00000213512	H	Not used as input
GDNF	ENSG00000168621	J	Not used as input
GJB3	ENSG00000188910	E	Not used as input
GLI1	ENSG00000111087	K	Not used as input
GLI2	ENSG00000074047	J	Not used as input
GLT8D2	ENSG00000120820	J	Not used as input
GNAO1	ENSG00000087258	K	Not used as input
GNG2	ENSG00000186469	F	Not used as input
GPR12	ENSG00000132975	H	Not used as input
GPR42	ENSG00000126251	F	Not used as input
GPRIN2	ENSG00000204175	J	Not used as input
GRM7	ENSG00000196277	J	Not used as input
GZMK	ENSG00000113088	H	Not used as input
HAVCR1	ENSG00000113249	D	Not used as input
HES5	ENSG00000197921	H	Not used as input
HGFAC	ENSG00000109758	K	Not used as input
HLA-DQB2	ENSG00000232629	H	Not used as input
HORMAD1	ENSG00000143452	E	Not used as input
HTR7	ENSG00000148680	g	Not used as input
HTRA4	ENSG00000169495	J	Not used as input
HUNK	ENSG00000142149	J	Not used as input
ICOS	ENSG00000163600	F	Not used as input
IER3	ENSG00000137331	K	Not used as input
IFIT1B	ENSG00000204010	E	Not used as input
IFNLR1	ENSG00000185436	J	Not used as input
IGFN1	ENSG00000163395	K	Not used as input
IGLL5	ENSG00000254709	J	Not used as input
IGSF9	ENSG00000085552	J	Not used as input
IL12A	ENSG00000168811	J	Not used as input
IL34	ENSG00000157368	J	Not used as input
IL4I1	ENSG00000104951	K	Not used as input
ITGAL	ENSG00000005844	g	Not used as input
ITGB8	ENSG00000105855	J	Not used as input
JUN	ENSG00000177606	H	Not used as input
KCNB2	ENSG00000182674	J	Not used as input
KCNF1	ENSG00000162975	g	Not used as input
KCNN4	ENSG00000104783	K	Not used as input
KIF20A	ENSG00000112984	g	Not used as input
KIF21B	ENSG00000116852	H	Not used as input
KLHL31	ENSG00000124743	F	Not used as input
KLKB1	ENSG00000164344	H	Not used as input
KMO	ENSG00000117009	g	Not used as input
KRT222	ENSG00000213424	H	Not used as input
KRT24	ENSG00000167916	H	Not used as input
LDHAL6B	ENSG00000171989	J	Not used as input
LMO3	ENSG00000048540	H	Not used as input
LMO7	ENSG00000136153	J	Not used as input
LRP5	ENSG00000162337	F	Not used as input
LRRC15	ENSG00000172061	J	Not used as input
LSAMP	ENSG00000185565	J	Not used as input
LY6H	ENSG00000176956	J	Not used as input
MACC1	ENSG00000183742	g	Not used as input
MARCH2	ENSG00000099785	F	Not used as input
MAST2	ENSG00000086015	J	Not used as input
MATN1	ENSG00000162510	K	Not used as input
MCF2	ENSG00000101977	g	Not used as input
MDFI	ENSG00000112559	F	Not used as input
MESP1	ENSG00000166823	F	Not used as input
MEST	ENSG00000106484	D	Not used as input
MFAP4	ENSG00000166482	J	Not used as input
MIA	ENSG00000261857	K	Not used as input
MICAL1	ENSG00000135596	F	Not used as input
MMP11	ENSG00000099953	J	Not used as input
MMP7	ENSG00000137673	g	Not used as input
MS4A4E	ENSG00000214787	g	Not used as input
MSI1	ENSG00000135097	J	Not used as input
MUM1L1	ENSG00000157502	K	Not used as input
MUSTN1	ENSG00000272573	K	Not used as input
MYEOV	ENSG00000172927	g	Not used as input
NALCN	ENSG00000102452	J	Not used as input
NAP1L2	ENSG00000186462	K	Not used as input
NEDD4L	ENSG00000049759	K	Not used as input
NEK2	ENSG00000117650	g	Not used as input
NKAIN1	ENSG00000084628	K	Not used as input
NKD2	ENSG00000145506	K	Not used as input
NPC1L1	ENSG00000015520	K	Not used as input
NPR3	ENSG00000113389	H	Not used as input
NR0B1	ENSG00000169297	K	Not used as input
NTNG1	ENSG00000162631	J	Not used as input
OGN	ENSG00000106809	J	Not used as input
OLFM2	ENSG00000105088	K	Not used as input
OLR1	ENSG00000173391	K	Not used as input
OMG	ENSG00000126861	H	Not used as input
OPCML	ENSG00000183715	K	Not used as input
OR2I1P	ENSG00000237988	F	Not used as input
OTOA	ENSG00000155719	g	Not used as input
P2RX6	ENSG00000099957	H	Not used as input
P2RX7	ENSG00000089041	J	Not used as input
PAQR5	ENSG00000137819	J	Not used as input
PARVG	ENSG00000138964	g	Not used as input
PATL2	ENSG00000229474	g	Not used as input
PBK	ENSG00000168078	K	Not used as input
PCDHA13	ENSG00000239389	D	Not used as input
PCP4	ENSG00000183036	K	Not used as input
PDE6G	ENSG00000185527	g	Not used as input
PHC1	ENSG00000111752	J	Not used as input
PHF21A	ENSG00000135365	J	Not used as input
PKP2	ENSG00000057294	K	Not used as input
PLA1A	ENSG00000144837	F	Not used as input
PLA2G15	ENSG00000103066	g	Not used as input
PLA2G7	ENSG00000146070	g	Not used as input
PLOD2	ENSG00000152952	K	Not used as input
PMAIP1	ENSG00000141682	J	Not used as input
PNLIPRP3	ENSG00000203837	E	Not used as input
PODNL1	ENSG00000132000	g	Not used as input
PON1	ENSG00000005421	J	Not used as input
POPDC3	ENSG00000132429	g	Not used as input
PPP4R4	ENSG00000119698	J	Not used as input
PRAME	ENSG00000185686	g	Not used as input
PRKG2	ENSG00000138669	J	Not used as input
PTCH2	ENSG00000117425	D	Not used as input
PTCHD3	ENSG00000182077	H	Not used as input
PTGER3	ENSG00000050628	F	Not used as input
PTGFR	ENSG00000122420	J	Not used as input
RASGRF1	ENSG00000058335	D	Not used as input
RASL11B	ENSG00000128045	g	Not used as input
RASSF8	ENSG00000123094	J	Not used as input
RBM46	ENSG00000151962	D	Not used as input
RDH12	ENSG00000139988	E	Not used as input
RERGL	ENSG00000111404	F	Not used as input
RFX8	ENSG00000196460	J	Not used as input
ROR2	ENSG00000169071	J	Not used as input
RORC	ENSG00000143365	J	Not used as input
SAMD11	ENSG00000187634	J	Not used as input
SCARA3	ENSG00000168077	J	Not used as input
SCG2	ENSG00000171951	J	Not used as input
SCN4A	ENSG00000007314	F	Not used as input
SDR16C5	ENSG00000170786	F	Not used as input
SH2D1A	ENSG00000183918	H	Not used as input
SKA1	ENSG00000154839	g	Not used as input
SLAMF6	ENSG00000162739	g	Not used as input
SLAMF9	ENSG00000162723	J	Not used as input
SLC15A5	ENSG00000188991	F	Not used as input
SLC22A15	ENSG00000163393	J	Not used as input
SLC25A48	ENSG00000145832	E	Not used as input
SLC28A3	ENSG00000197506	J	Not used as input
SLC44A5	ENSG00000137968	J	Not used as input
SLC4A4	ENSG00000080493	J	Not used as input
SLC52A1	ENSG00000132517	H	Not used as input
SLC6A12	ENSG00000111181	g	Not used as input
SLC6A7	ENSG00000011083	K	Not used as input
SLFN14	ENSG00000236320	H	Not used as input
SMKR1	ENSG00000240204	J	Not used as input
SMPDL3B	ENSG00000130768	J	Not used as input
SOAT2	ENSG00000167780	H	Not used as input
SORCS2	ENSG00000184985	J	Not used as input
SOWAHD	ENSG00000187808	g	Not used as input
SPIB	ENSG00000269404	H	Not used as input
SPNS3	ENSG00000182557	J	Not used as input
SPP1	ENSG00000118785	H	Not used as input
SPSB4	ENSG00000175093	D	Not used as input
ST14	ENSG00000149418	g	Not used as input
STMN2	ENSG00000104435	g	Not used as input
SUSD4	ENSG00000143502	K	Not used as input
TACSTD2	ENSG00000184292	E	Not used as input
TBC1D10C	ENSG00000175463	g	Not used as input
TBX4	ENSG00000121075	K	Not used as input
TCEAL2	ENSG00000184905	J	Not used as input
TEX12	ENSG00000150783	E	Not used as input
TGM5	ENSG00000104055	H	Not used as input
THBS3	ENSG00000169231	J	Not used as input
TIGIT	ENSG00000181847	H	Not used as input
TM4SF19	ENSG00000145107	H	Not used as input
TMEM255A	ENSG00000125355	J	Not used as input
TMEM52B	ENSG00000165685	J	Not used as input
TMPRSS13	ENSG00000137747	g	Not used as input
TMSB15A	ENSG00000158164	J	Not used as input
TNFRSF17	ENSG00000048462	g	Not used as input
TNFSF15	ENSG00000181634	J	Not used as input
TNFSF18	ENSG00000120337	F	Not used as input
TNFSF9	ENSG00000125657	K	Not used as input
TNN	ENSG00000120332	F	Not used as input
TPPP3	ENSG00000159713	H	Not used as input
TREML1	ENSG00000161911	E	Not used as input
TRIM50	ENSG00000146755	g	Not used as input
TRPA1	ENSG00000104321	J	Not used as input
TRPC4	ENSG00000133107	J	Not used as input
TSPAN11	ENSG00000110900	H	Not used as input
TSPAN14	ENSG00000108219	F	Not used as input
TTC7B	ENSG00000165914	F	Not used as input
TYROBP	ENSG00000011600	g	Not used as input
UBD	ENSG00000213886	g	Not used as input
ULBP1	ENSG00000111981	K	Not used as input
URAD	ENSG00000183463	H	Not used as input
VASH2	ENSG00000143494	J	Not used as input
VAT1L	ENSG00000171724	J	Not used as input
VCAM1	ENSG00000162692	g	Not used as input
VNN1	ENSG00000112299	g	Not used as input
WISP1	ENSG00000104415	K	Not used as input
WISP2	ENSG00000064205	H	Not used as input
WNT1	ENSG00000125084	H	Not used as input
WNT10A	ENSG00000135925	J	Not used as input
WNT10B	ENSG00000169884	H	Not used as input
WNT3	ENSG00000108379	K	Not used as input
WSCD2	ENSG00000075035	H	Not used as input
XCL1	ENSG00000143184	H	Not used as input
ZC3H12B	ENSG00000102053	J	Not used as input
ZFR2	ENSG00000105278	J	Not used as input
ZNF250	ENSG00000196150	J	Not used as input
ZNF365	ENSG00000138311	D	Not used as input
ZNF385B	ENSG00000144331	H	Not used as input
ZNF469	ENSG00000225614	K	Not used as input
ABCA10	ENSG00000154263	I	Disconnected from main network
ABCB5	ENSG00000004846	I	Disconnected from main network
ACY3	ENSG00000132744	I	Disconnected from main network
ADAM33	ENSG00000149451	I	Disconnected from main network
ADAMTS16	ENSG00000145536	I	Disconnected from main network
ALPK3	ENSG00000136383	A	Disconnected from main network
ANKRD10	ENSG00000088448	I	Disconnected from main network
ANKRD20A8P	ENSG00000229089	A	Disconnected from main network
ANKRD53	ENSG00000144031	A	Disconnected from main network
APCDD1	ENSG00000154856	C	Disconnected from main network
APOBEC3H	ENSG00000100298	I	Disconnected from main network
ART5	ENSG00000167311	I	Disconnected from main network
ASCC2	ENSG00000100325	A	Disconnected from main network
ATMIN	ENSG00000166454	B	Disconnected from main network
BEND4	ENSG00000188848	I	Disconnected from main network
BEND6	ENSG00000151917	I	Disconnected from main network
BIRC7	ENSG00000101197	I	Disconnected from main network
BOK	ENSG00000176720	C	Disconnected from main network
BTBD16	ENSG00000138152	I	Disconnected from main network
C11orf45	ENSG00000174370	I	Disconnected from main network
C12orf60	ENSG00000182993	I	Disconnected from main network
C16orf89	ENSG00000153446	I	Disconnected from main network
C19orf71	ENSG00000183397	C	Disconnected from main network
C1QTNF1	ENSG00000173918	A	Disconnected from main network
C20orf203	ENSG00000198547	I	Disconnected from main network
C4orf19	ENSG00000154274	C	Disconnected from main network
C9orf50	ENSG00000179058	I	Disconnected from main network
C9orf66	ENSG00000183784	C	Disconnected from main network
CCDC110	ENSG00000168491	I	Disconnected from main network
CD248	ENSG00000174807	B	Disconnected from main network
CD300LB	ENSG00000178789	A	Disconnected from main network
CDH20	ENSG00000101542	C	Disconnected from main network
CDR1	ENSG00000184258	A	Disconnected from main network
CDX1	ENSG00000113722	I	Disconnected from main network
CHIC1	ENSG00000204116	I	Disconnected from main network
CLEC4F	ENSG00000152672	I	Disconnected from main network
CLMP	ENSG00000166250	A	Disconnected from main network
CNTFR	ENSG00000122756	C	Disconnected from main network
COX10	ENSG00000006695	B	Disconnected from main network
CPAMD8	ENSG00000160111	C	Disconnected from main network
CPNE4	ENSG00000196353	C	Disconnected from main network
CXorf65	ENSG00000204165	C	Disconnected from main network
DEFB124	ENSG00000180383	I	Disconnected from main network
ECEL1	ENSG00000171551	A	Disconnected from main network
ECHDC3	ENSG00000134463	B	Disconnected from main network
EDA2R	ENSG00000131080	I	Disconnected from main network
EPB41L4B	ENSG00000095203	C	Disconnected from main network
EXOC3L4	ENSG00000205436	I	Disconnected from main network
FAM177B	ENSG00000197520	I	Disconnected from main network
FAM72C	ENSG00000203817	C	Disconnected from main network
FAM72D	ENSG00000215784	C	Disconnected from main network
FAM83F	ENSG00000133477	C	Disconnected from main network
FAM89A	ENSG00000182118	C	Disconnected from main network
FAM98A	ENSG00000119812	B	Disconnected from main network
FCN2	ENSG00000160339	B	Disconnected from main network
FCN3	ENSG00000142748	C	Disconnected from main network
FCRL6	ENSG00000181036	I	Disconnected from main network
FGF14	ENSG00000102466	I	Disconnected from main network
FGF16	ENSG00000196468	I	Disconnected from main network
FIBCD1	ENSG00000130720	A	Disconnected from main network
FKBP7	ENSG00000079150	I	Disconnected from main network
FNDC4	ENSG00000115226	A	Disconnected from main network
GCDH	ENSG00000105607	B	Disconnected from main network
GCHFR	ENSG00000137880	B	Disconnected from main network
GDF10	ENSG00000107623	C	Disconnected from main network
GGT1	ENSG00000100031	I	Disconnected from main network
GLIS1	ENSG00000174332	B	Disconnected from main network
GPR1	ENSG00000183671	I	Disconnected from main network
GREB1L	ENSG00000141449	C	Disconnected from main network
GZMM	ENSG00000197540	I	Disconnected from main network
HAO2	ENSG00000116882	I	Disconnected from main network
HAPLN3	ENSG00000140511	C	Disconnected from main network
HKDC1	ENSG00000156510	I	Disconnected from main network
HSPB7	ENSG00000173641	C	Disconnected from main network
IGFBP6	ENSG00000167779	I	Disconnected from main network
IGLON5	ENSG00000142549	C	Disconnected from main network
JAKMIP2	ENSG00000176049	C	Disconnected from main network
KCNA6	ENSG00000151079	I	Disconnected from main network
KCNJ5	ENSG00000120457	I	Disconnected from main network
KHDRBS2	ENSG00000112232	I	Disconnected from main network
KIAA1755	ENSG00000149633	I	Disconnected from main network
KRT79	ENSG00000185640	B	Disconnected from main network
LIPC	ENSG00000166035	I	Disconnected from main network
LOXL1	ENSG00000129038	I	Disconnected from main network
MAP3K12	ENSG00000139625	I	Disconnected from main network
MCM10	ENSG00000065328	C	Disconnected from main network
MGAT3	ENSG00000128268	B	Disconnected from main network
MLX	ENSG00000108788	B	Disconnected from main network
MS4A14	ENSG00000166928	I	Disconnected from main network
NANOS1	ENSG00000188613	C	Disconnected from main network
NAP1L4	ENSG00000205531	B	Disconnected from main network
NDRG4	ENSG00000103034	B	Disconnected from main network
NDUFV3	ENSG00000160194	B	Disconnected from main network
NNAT	ENSG00000053438	C	Disconnected from main network
NUGGC	ENSG00000189233	I	Disconnected from main network
OLFML1	ENSG00000183801	I	Disconnected from main network
PAPLN	ENSG00000100767	I	Disconnected from main network
PCDH10	ENSG00000138650	A	Disconnected from main network
PDE1C	ENSG00000154678	I	Disconnected from main network
PI16	ENSG00000164530	I	Disconnected from main network
PITX3	ENSG00000107859	C	Disconnected from main network
PLEKHG6	ENSG00000008323	C	Disconnected from main network
PLN	ENSG00000198523	A	Disconnected from main network
PLXNC1	ENSG00000136040	I	Disconnected from main network
PRG2	ENSG00000186652	A	Disconnected from main network
PRRG3	ENSG00000130032	I	Disconnected from main network
PRRT2	ENSG00000167371	I	Disconnected from main network
PRRT4	ENSG00000224940	B	Disconnected from main network
PSORS1C1	ENSG00000204540	I	Disconnected from main network
PTCHD4	ENSG00000244694	I	Disconnected from main network
PYHIN1	ENSG00000163564	I	Disconnected from main network
RASL10B	ENSG00000141150	A	Disconnected from main network
RBP5	ENSG00000139194	I	Disconnected from main network
RNF157	ENSG00000141576	A	Disconnected from main network
ROBO2	ENSG00000185008	I	Disconnected from main network
RORB	ENSG00000198963	B	Disconnected from main network
RP1	ENSG00000104237	C	Disconnected from main network
RRAD	ENSG00000166592	C	Disconnected from main network
SARDH	ENSG00000123453	I	Disconnected from main network
SCML4	ENSG00000146285	I	Disconnected from main network
SCO1	ENSG00000133028	B	Disconnected from main network
SEL1L2	ENSG00000101251	A	Disconnected from main network
SEMA5B	ENSG00000082684	I	Disconnected from main network
SETBP1	ENSG00000152217	I	Disconnected from main network
SFI1	ENSG00000198089	I	Disconnected from main network
SLC16A10	ENSG00000112394	A	Disconnected from main network
SLC29A4	ENSG00000164638	C	Disconnected from main network
SLC35C1	ENSG00000181830	B	Disconnected from main network
SMIM3	ENSG00000256235	A	Disconnected from main network
SPTSSB	ENSG00000196542	I	Disconnected from main network
SRCIN1	ENSG00000017373	A	Disconnected from main network
SULT4A1	ENSG00000130540	A	Disconnected from main network
SYCP1	ENSG00000198765	C	Disconnected from main network
SYN2	ENSG00000157152	C	Disconnected from main network
TCF21	ENSG00000118526	I	Disconnected from main network
TENM3	ENSG00000218336	A	Disconnected from main network
TM4SF20	ENSG00000168955	A	Disconnected from main network
TMEM239	ENSG00000198326	A	Disconnected from main network
TMEM52	ENSG00000178821	A	Disconnected from main network
TRIM55	ENSG00000147573	A	Disconnected from main network
TTC36	ENSG00000172425	A	Disconnected from main network
TTC39A	ENSG00000085831	A	Disconnected from main network
TYRO3	ENSG00000092445	B	Disconnected from main network
VEPH1	ENSG00000197415	A	Disconnected from main network
WDR91	ENSG00000105875	I	Disconnected from main network
XKRX	ENSG00000182489	I	Disconnected from main network
ZFP37	ENSG00000136866	I	Disconnected from main network
ZMYND15	ENSG00000141497	I	Disconnected from main network
FASN	ENSG00000169710	A	0.275055
DGAT2	ENSG00000062282	B	0.247624
ACLY	ENSG00000131473	A	0.212761
ACSL1	ENSG00000151726	A	0.210049
GPAM	ENSG00000119927	C	0.200846
AGPAT2	ENSG00000169692	C	0.171523
PNPLA3	ENSG00000100344	B	0.166583
ACSS2	ENSG00000131069	B	0.164269
ABHD5	ENSG00000011198	C	0.117386
SLC27A2	ENSG00000140284	A	0.0998917
HADHB	ENSG00000138029	B	0.0780694
PGD	ENSG00000142657	B	0.0714084
IDH3G	ENSG00000067829	B	0.0533661
SUCLG2	ENSG00000172340	B	0.0410344
BDH1	ENSG00000161267	A	0.0389437
ADH4	ENSG00000198099	B	0.0306655
HSD17B10	ENSG00000072506	B	0.0150504
CYB5A	ENSG00000166347	B	0.0142314
GGT5	ENSG00000099998	B	0.0138705
NAT8L	ENSG00000185818	C	0.00899662
AKR1C2	ENSG00000151632	C	0.00423065
GGCT	ENSG00000006625	A	0.00216917
NAA50	ENSG00000121579	A	0.000491844
PLIN1	ENSG00000166819	C	0.20923
ADIPOQ	ENSG00000181092	C	0.191585
GPD1	ENSG00000167588	C	0.164353
GHR	ENSG00000112964	B	0.00238466
G0S2	ENSG00000123689	B	0.0473018
RETSAT	ENSG00000042445	C	0.00167305
SCD	ENSG00000099194	A	0.249389
PRKAR2B	ENSG00000005249	C	0.0157296
CEBPA	ENSG00000245848	B	0.0877134
MARC1	ENSG00000186205	C	0.000778272
CIDEC	ENSG00000187288	C	0.137687
CIDEA	ENSG00000176194	C	0.116212
LEP	ENSG00000174697	F	Not used as input
ACACB	ENSG00000076555	C	0.162737
LIPE	ENSG00000079435	C	0.231339
GYG2	ENSG00000056998	C	5.16578e-05
KLB	ENSG00000134962	C	0.0110572
LGALS12	ENSG00000133317	B	Disconnected from main network
AIFM2	ENSG00000042286	B	Disconnected from main network
ACO1	ENSG00000122729	B	0.0554243
PDE3B	ENSG00000152270	C	0.0865341
LPL	ENSG00000175445	C	Disconnected from main network
SLC19A3	ENSG00000135917	C	0.00423065
AOC3	ENSG00000131471	C	0.00378103
PCK1	ENSG00000124253	B	0.200489
ACVR1C	ENSG00000123612	C	0.000669945
MGST1	ENSG00000008394	C	0.00298637
MRAP	ENSG00000170262	B	0.00854472
SLC7A10	ENSG00000130876	B	0.000601393
ABCD2	ENSG00000173208	B	0.0458276
RBP4	ENSG00000138207	B	0.0233102
IGF1	ENSG00000017427	A	0.0389011
ANGPTL4	ENSG00000167772	A	0.0148119
AZGP1	ENSG00000160862	C	0.0431873
PGM1	ENSG00000079739	B	0.0245374
ALDH2	ENSG00000111275	C	0.0180289
TMEM132C	ENSG00000181234	C	3.05873e-05
TF	ENSG00000091513	A	0.00403779
PEX11A	ENSG00000166821	B	0.0321005
PC	ENSG00000173599	C	0.121251
DUSP4	ENSG00000120875	A	0.00109399
PTPN3	ENSG00000070159	A	0.000149316
HEBP2	ENSG00000051620	C	0.0175909
ORMDL3	ENSG00000172057	B	0.0148758
ECH1	ENSG00000104823	C	0.0276751
CTSK	ENSG00000143387	I	0.0772229
PTPRF	ENSG00000142949	B	2.68635e-05
ACACA	ENSG00000132142	A	0.232595
ISOC1	ENSG00000066583	C	0.0106563
VEGFA	ENSG00000112715	A	0.0503779
MPC1	ENSG00000060762	B	0.00665445
FOSB	ENSG00000125740	C	0.00325236
PSAT1	ENSG00000135069	A	0.00762405
ADRA1A	ENSG00000120907	C	0.0153293
PLXNA4	ENSG00000221866	B	0.00280643
NTSR2	ENSG00000169006	A	0.00240033
IFNG	ENSG00000111537	I	0.396654
AFF2	ENSG00000155966	C	0.000159845
FOS	ENSG00000170345	C	0.0179669
GPT	ENSG00000167701	B	0.127589
LPIN1	ENSG00000134324	A	0.218499
SLC39A14	ENSG00000104635	A	0.00372452
SLC16A7	ENSG00000118596	A	0.0021761
HCAR3	ENSG00000255398	C	0.00318993
FOLH1	ENSG00000086205	I	0.0236999
MT1X	ENSG00000187193	A	0.000243718
EGR1	ENSG00000120738	C	0.0198822
FOXL1	ENSG00000176678	A	5.6897e-07
NRCAM	ENSG00000091129	A	0.0019763
F5	ENSG00000198734	A	0.00638127
SHMT1	ENSG00000176974	B	0.0284918
DCN	ENSG00000011465	I	0.0174479
COPB2	ENSG00000184432	B	0.000130044
HAMP	ENSG00000105697	A	0.0112409
ALK	ENSG00000171094	B	0.0120321
PARVA	ENSG00000197702	A	0.004333
TM7SF2	ENSG00000149809	C	0.00250005
HK2	ENSG00000159399	A	0.0811122
DHCR7	ENSG00000172893	A	0.0628022
NSDHL	ENSG00000147383	B	0.0457832
PPIF	ENSG00000108179	A	0.00577215
SLC1A3	ENSG00000079215	A	0.00454061
GLUL	ENSG00000135821	A	0.0513284
FABP5	ENSG00000164687	B	0.0904153
AACS	ENSG00000081760	A	0.0524733
MAPT	ENSG00000186868	C	0.00381996
ASPN	ENSG00000106819	I	0.0114203
ADIPOR2	ENSG00000006831	A	0.0358456
CD8A	ENSG00000153563	I	0.177002
IP6K3	ENSG00000161896	A	0.00636245
ALDH1L1	ENSG00000144908	C	0.0159232
PARP1	ENSG00000143799	B	0.00280643
CCR3	ENSG00000183625	I	0.258043
POU2AF1	ENSG00000110777	I	0.0237536
ACOT4	ENSG00000177465	B	0.0319714
PEMT	ENSG00000133027	C	0.0484837
PPP1R1A	ENSG00000135447	C	0.00109039
SAR1B	ENSG00000152700	C	0.00137627
HEPACAM	ENSG00000165478	C	0.00643192
GPR37	ENSG00000170775	A	0.00318993
TRHDE	ENSG00000072657	C	0.0010843
APMAP	ENSG00000101474	B	8.07984e-08
CXCR4	ENSG00000121966	I	0.363784
CYP3A5	ENSG00000106258	A	0.00171645
TKT	ENSG00000163931	B	0.0774599
KIAA1549L	ENSG00000110427	A	1.77728e-06
EGR2	ENSG00000122877	B	0.00514747
FRZB	ENSG00000162998	I	0.00251756
HLA-DMB	ENSG00000242574	I	0.00158613
ACP5	ENSG00000102575	I	0.0237915
IL1RN	ENSG00000136689	A	0.019076
CYP1A2	ENSG00000140505	A	0.00834443
GDF15	ENSG00000130513	I	0.0275251
SLC2A4	ENSG00000181856	C	0.172132
LAMB3	ENSG00000196878	A	0.0025877
DMRTA1	ENSG00000176399	B	3.88222e-05
MMP15	ENSG00000102996	B	0.00497981
ADRB3	ENSG00000188778	A	0.0550441
CCL4	ENSG00000129277	B	0.0164332
WLS	ENSG00000116729	B	9.70591e-06
ADCY2	ENSG00000078295	A	0.0116553
MATK	ENSG00000007264	I	0.0685816
USP10	ENSG00000103194	A	0.00897931
MOCOS	ENSG00000075643	A	0.0101326
PDE8B	ENSG00000113231	A	0.000782414
CISH	ENSG00000114737	A	0.00291782
SH3KBP1	ENSG00000147010	C	0.00023302
RTN4	ENSG00000115310	C	1.53078e-06
TXNDC9	ENSG00000115514	C	0.000204114
MOGAT2	ENSG00000166391	A	0.0782642
CDKN2A	ENSG00000147889	I	0.0733311
LUM	ENSG00000139329	I	0.0419034
HTR2B	ENSG00000135914	I	0.00565179
JUNB	ENSG00000171223	A	0.00262805
ITGAX	ENSG00000140678	A	0.0162374
ATF5	ENSG00000169136	A	0.00697713
GPT2	ENSG00000166123	C	0.0494673
SCGN	ENSG00000079689	C	0.000110217
CD40LG	ENSG00000102245	I	0.40252
TREH	ENSG00000118094	A	0.0197633
RGS1	ENSG00000090104	I	0.0603928
CLDN2	ENSG00000165376	B	0.0010171
CCL3	ENSG00000006075	A	0.0059878
CXCL10	ENSG00000169245	I	0.324188
SLAMF7	ENSG00000026751	I	0.100558
PMEL	ENSG00000185664	I	0.16352
BLNK	ENSG00000095585	I	0.00923772
PRR18	ENSG00000176381	B	0.000499346
CD70	ENSG00000125726	I	0.122079
PAX8	ENSG00000125618	A	0.000681922
FASLG	ENSG00000117560	I	0.27041
MC5R	ENSG00000176136	B	0.00471315
PCYT1A	ENSG00000161217	C	0.0257778
EIF5	ENSG00000100664	A	6.05526e-05
SLC25A18	ENSG00000182902	C	0.000224095
GPR26	ENSG00000154478	I	0.000637711
ULBP3	ENSG00000131019	A	4.08366e-09
TNFRSF9	ENSG00000049249	C	0.010064
EIF4G2	ENSG00000110321	A	0.0010248
MOGAT1	ENSG00000124003	B	0.128117
LY9	ENSG00000122224	I	0.106341
MZB1	ENSG00000170476	I	0.00366023
SPON1	ENSG00000152268	A	1.67406e-05
TAGAP	ENSG00000164691	I	0.0139452
GLRB	ENSG00000109738	B	6.05526e-05
UBA3	ENSG00000144744	C	0.000187575
DUSP2	ENSG00000158050	A	0.00127663
KCNB1	ENSG00000158445	A	0.000879826
EIF4EBP1	ENSG00000187840	A	0.0060785
FADS1	ENSG00000149485	A	0.122225
RAC3	ENSG00000169750	B	0.000158636
SLC6A8	ENSG00000130821	A	0.00292572
MS4A1	ENSG00000156738	I	0.0426427
GPR15	ENSG00000154165	I	0.00388314
GLDN	ENSG00000186417	B	0.000109289
CHCHD10	ENSG00000250479	B	0.002917
FCER2	ENSG00000104921	I	0.0204261
SLC30A5	ENSG00000145740	C	0.000255099
PSMD3	ENSG00000108344	A	0.000814381
RTN4RL1	ENSG00000185924	B	1.53078e-06
PSMB6	ENSG00000142507	B	4.44819e-05
PPP1R1B	ENSG00000131771	C	0.00319384
SFRP2	ENSG00000145423	I	0.0115636
ARFGAP2	ENSG00000149182	B	0.000915435
EPO	ENSG00000130427	I	0.115249
TRAT1	ENSG00000163519	I	0.0255523
ASIP	ENSG00000101440	C	0.0101743
TUBB3	ENSG00000258947	A	0.000715634
FFAR4	ENSG00000186188	B	0.0212628
THEMIS	ENSG00000172673	I	0.0363158
TREM2	ENSG00000095970	I	0.0147203
MYH11	ENSG00000133392	A	0.00974469
P2RY10	ENSG00000078589	I	0.0403413
GDF6	ENSG00000156466	I	0.00242813
PLA2G2D	ENSG00000117215	I	0.00292594
CD52	ENSG00000169442	I	0.0883563
CXCL11	ENSG00000169248	I	0.272124
SLC29A2	ENSG00000174669	B	0.000348403
KCNJ1	ENSG00000151704	C	0.000172792
GZMH	ENSG00000100450	I	0.0255523
NTS	ENSG00000133636	A	0.00621365
USO1	ENSG00000138768	C	0.00143373
MUSK	ENSG00000030304	A	0.00238744
ULBP2	ENSG00000131015	A	8.07983e-08
TMEM119	ENSG00000183160	I	0.00203832
EOMES	ENSG00000163508	I	0.165689
WNT16	ENSG00000002745	I	0.00253176
FBXO27	ENSG00000161243	C	0.000187575
PLD4	ENSG00000166428	I	0.0213087
WNT6	ENSG00000115596	I	0.00253176
MT1M	ENSG00000205364	A	0.000218184
RTP4	ENSG00000136514	I	0.0498506
MCOLN2	ENSG00000153898	I	0.00738004
FGFRL1	ENSG00000127418	A	0.000131636
CSPG5	ENSG00000114646	B	0.000351688
MRPS11	ENSG00000181991	B	4.90271e-05
MYH14	ENSG00000105357	C	0.000541481
KLF14	ENSG00000174595	B	0.000519922
CMTM5	ENSG00000166091	C	2.765e-05
FBXW5	ENSG00000159069	B	0.000187575
C11orf86	ENSG00000173237	B	0.0066268
TPD52L2	ENSG00000101150	A	0.00641726
FOXS1	ENSG00000179772	I	0.00738004
MT1B	ENSG00000169688	A	0.000231626
HCAR2	ENSG00000182782	C	0.0261542
GIPR	ENSG00000010310	I	0.000637711
LGI3	ENSG00000168481	C	0.000134298
NCR1	ENSG00000189430	I	0.199001
NACC1	ENSG00000160877	A	0.000539703
SCIN	ENSG00000006747	I	0.0167665
HLA-DQA2	ENSG00000237541	I	0.0113274
MT1A	ENSG00000205362	A	0.000231626
STOX1	ENSG00000165730	B	0.00035974
UCN2	ENSG00000145040	C	0.0010171
NPAS4	ENSG00000174576	C	0.00262805
CTHRC1	ENSG00000164932	I	0.000309776
HAUS7	ENSG00000213397	A	0.00336693
ADAMTS4	ENSG00000158859	A	0.000283304
TRAPPC1	ENSG00000170043	B	0.0185721
TNFRSF13C	ENSG00000159958	I	0.109069
TRMT10A	ENSG00000145331	C	0.000822156
GRAMD4	ENSG00000075240	C	0.000158636
VANGL2	ENSG00000162738	I	0.00256062
WNT9B	ENSG00000158955	C	0.000171028
FITM2	ENSG00000197296	B	0.0330325
CES4A	ENSG00000172824	A	0.0142572
TMEM126A	ENSG00000171202	C	4.08366e-09
SLC36A2	ENSG00000186335	A	0.00641494
C2CD4B	ENSG00000205502	B	0.009526
TUBA3D	ENSG00000075886	B	0.000261553
FAM47E-STBD1	ENSG00000118804	A	0.000907561
