# Supplementary material for: The Transcriptomic Landscape of Age-Induced Changes in Human Visceral Fat and the Predicted Omentum-Liver Connectome in Males
Source: Biomedicines. 2023 May 14;11(5):1446. doi: 10.3390/biomedicines11051446 (PMC10216224; doi:10.3390/biomedicines11051446)
Supplement: Supplementary file 1 [file biomedicines-11-01446-s001.zip › Supplementari_material_description.txt]

Supplementary Material S1: Male DEGs. Supplementary Material S2: Female DEGs. Supplementary Material S3: Gene clusters. Supplementary Material S4: Enrichment results of each cluster. Sup-plementary Material S5: Deconvolution results of each sample. Supplementary Material S6: GWAS results of the connectome. Supplementary Material S7: Eigenvector centrality of the gene networks.
